# Supplementary material for: Transition-metal-free chemoselective catalytic hydrosilylation of tertiary amides to hemiaminals by Me2SiH2generated from controllable disproportionation of 1,1,3,3-tetramethyldisiloxane
Source: Royal Society of Chemistry journal article supplement (doi:10.1039/d2qo01766k), 2023-01-01

*Supporting Information*

**Transition-metal-free Chemoselective Catalytic  
Hydrosilylation of Tertiary Amides to Hemiaminals  
by Me<sub>2</sub>SiH<sub>2</sub> Generated from Controllable  
Disproportionation of 1,1,3,3-Tetramethyldisiloxane**

Xiaoyu Wu, Yue Wang, Liqun Yang, Xiaomin Xie\*<sup>†</sup> and Zhaoguo Zhang\*<sup>‡</sup>

<sup>†</sup> *Shanghai Key Laboratory for Molecular Engineering of Chiral Drugs, School of Chemistry and Chemical Engineering, Shanghai Jiao Tong University, 800 Dongchuan Road, Shanghai 200240, China*

<sup>‡</sup> *State Key Laboratory of Organometallic Chemistry, Shanghai Institute of Organic Chemistry, Chinese Academy of Sciences, 345 Lingling Road, Shanghai 200032,*

---

## Table of Contents

|                                                                                            |    |
|--------------------------------------------------------------------------------------------|----|
| Table of Contents                                                                          | 1  |
| 1. General Information                                                                     | 2  |
| 2. Optimization of the Reaction Conditions of Alkoxide-Catalyzed Hydrosilylation of Amides | 2  |
| 3. Time-Course of Hydrosilylation Reduction                                                | 4  |
| 4. Alkoxide-Catalyzed Hydrosilylation of Amides                                            | 7  |
| 4.1 General Experimental Procedures                                                        | 7  |
| 4.2 Characterization of Aldehydes                                                          | 7  |
| 4.3 Tandem Reduction and Nucleophilic Attack of Alkyl Amides and Lactams                   | 15 |
| 4.4 Unsuccessful Substrates                                                                | 17 |
| 5. Competitive Experiments                                                                 | 19 |
| 6. Mechanistic Experiments                                                                 | 20 |
| 6.1 NMR Analysis                                                                           | 20 |
| 6.2 ReactIR Analysis                                                                       | 26 |
| 6.3 GC-MS Analysis                                                                         | 26 |
| 6.4 Control Experiments                                                                    | 28 |
| 6.5 Kinetic Experiments                                                                    | 29 |
| 7. Synthetic Application Research                                                          | 31 |
| 7.1 Gram-scale Reaction                                                                    | 31 |
| 7.2 Chemoselective Reduction of Diamides                                                   | 31 |
| 7.3 Tandem Deoxygenative Functionalization                                                 | 32 |
| 7.4 Preparation of Pharmaceutical Intermediates                                            | 35 |
| 8. Synthesis and Characterization of Reactants                                             | 36 |
| 8.1 General Synthesis Procedure for Amides                                                 | 36 |
| 8.2 Characterization of amides                                                             | 37 |
| 8.3 General Synthesis Procedure and Characterization for Silane                            | 50 |
| 9. References                                                                              | 51 |
| 10. NMR Spectra Copies of the Amides, Aldehydes and Amines                                 | 52 |

## 1. General Information

Unless otherwise noted, all reactions were carried out under an atmosphere of nitrogen using standard Schlenk techniques. Materials were purchased from commercial suppliers and used without further purification. Anhydrous THF was freshly distilled from Sodium.  $^1\text{H}$  NMR and  $^{13}\text{C}$  NMR spectra were recorded on 500 MHz and 400 MHz spectrometer. The chemical shifts for  $^1\text{H}$  NMR were recorded in ppm downfield from tetramethylsilane (0.00 ppm) and deuteriochloroform (7.26 ppm) with the solvent resonance as the internal standard. The chemical shifts for  $^{13}\text{C}$  NMR were recorded in ppm downfield using the central peak of deuteriochloroform (77.1 ppm) as the internal standard. Coupling constants ( $J$ ) are reported in Hz and refer to apparent peak multiplications. HRMS were obtained on an ESI-TOF mass spectrometer. Flash column chromatography was performed on silica gel (300-400 mesh).

(Caution! combustible gas ( $\text{Me}_2\text{SiH}_2$ ) is generated under standard conditions)

## 2. Optimization of the Reaction Conditions of Alkoxide-Catalyzed

### Hydrosilylation of Amides

Table S1 Screening of silane

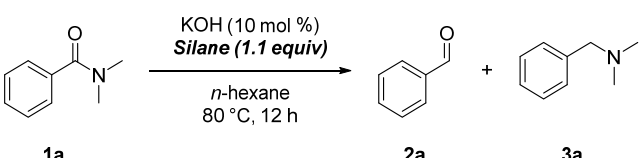

| Entry | Silane                       | Conv. (%) | Yield (%) |    |
|-------|------------------------------|-----------|-----------|----|
|       |                              |           | 2a        | 3a |
| 1     | $\text{Ph}_2\text{SiH}_2$    | 99        | 15        | 60 |
| 2     | $\text{PhSiH}_3$             | 90        | 3         | 63 |
| 3     | $\text{Ph}_3\text{SiH}$      | 71        | 21        | 38 |
| 4     | $\text{Ph}_2\text{MeSiH}$    | 69        | 26        | 22 |
| 5     | $\text{Et}_3\text{SiH}$      | 13        | 6         | 0  |
| 6     | $(\text{EtO})_3\text{SiH}$   | 47        | 4         | 8  |
| 7     | $(\text{MeO})_2\text{MeSiH}$ | 33        | 8         | 0  |
| 8     | TMDS                         | 98        | 62        | 23 |
| 9     | PMHS                         | 7         | 4         | 0  |

Reaction conditions: **1a** (298 mg, 2.0 mmol), KOH (11.2 mg, 0.2 mmol, 10 mol%), silane (1.1 equiv) and *n*-hexane (4.0 mL), 80 °C, 12 h. Conversion and yield were determined by GC analysis with 1,2,4,5-tetramethylbenzene as internal standard. Reaction was quenched by HCl (aq.)/THF solution.

Table S2 Screening of solvent

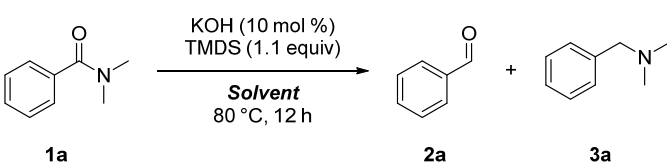

| Entry | Solvent | Conv. (%) | Yield (%) |  |
|-------|---------|-----------|-----------|--|
|-------|---------|-----------|-----------|--|

|    |                    |    | 2a | 3a |
|----|--------------------|----|----|----|
| 1  | Hexane             | 98 | 62 | 23 |
| 2  | Cyclohexane        | 99 | 65 | 12 |
| 3  | Heptane            | 99 | 56 | 29 |
| 4  | THF                | 56 | 17 | 37 |
| 5  | Dioxane            | 92 | 46 | 32 |
| 6  | Diglyme            | 97 | 43 | 34 |
| 7  | Toluene            | 95 | 40 | 35 |
| 8  | PhF                | 26 | 9  | 10 |
| 9  | CH <sub>3</sub> CN | 0  | 0  | 0  |
| 10 | DCE                | 0  | 0  | 0  |
| 11 | HMPA               | 31 | 0  | 18 |
| 12 | None               | 72 | 31 | 40 |

Reaction conditions: **1a** (298 mg, 2.0 mmol), KOH (11.2 mg, 0.2 mmol, 10 mol%), TMDS (295.5 mg, 2.2 mmol, 1.1 equiv) and solvent (4.0 mL), 80 °C, 12 h. Conversion and yield were determined by GC analysis with 1,2,4,5-tetramethylbenzene as internal standard. Reaction was quenched by HCl (aq.)/THF solution.

**Table S3 Screening of catalysts**

| Entry | Catalyst                           | Conv. (%) | Yield (%) |    |
|-------|------------------------------------|-----------|-----------|----|
|       |                                    |           | 2a        | 3a |
| 1     | <sup>t</sup> BuOK                  | 99        | 71        | 11 |
| 2     | TMSOK                              | 99        | 67        | 16 |
| 3     | CH <sub>3</sub> CH <sub>2</sub> OK | 99        | 51        | 28 |
| 4     | CH <sub>3</sub> OK                 | 79        | 23        | 38 |
| 5     | KOH                                | 99        | 65        | 12 |
| 6     | K <sub>2</sub> CO <sub>3</sub>     | 12        | 6         | 0  |
| 7     | KF                                 | 0         | 0         | 0  |
| 8     | DBU                                | 0         | 0         | 0  |
| 9     | 2,6-Lutidine                       | 0         | 0         | 0  |
| 10    | <sup>t</sup> BuONa                 | 29        | 21        | 0  |
| 11    | <sup>t</sup> BuOLi                 | 5         | 3         | 0  |

Reaction conditions: **1a** (298 mg, 2.0 mmol), base (10 mol%), TMDS (295.5 mg, 2.2 mmol, 1.1 equiv) and cyclohexane (4.0 mL), 80 °C, 12 h. Conversion and yield were determined by GC analysis with 1,2,4,5-tetramethylbenzene as internal standard. Reaction was quenched by HCl (aq.)/THF solution.

**Table S4 Screening of catalyst loading**

| Entry | X mol% | Conv. (%) | Yield (%) |
|-------|--------|-----------|-----------|
|       |        |           |           |

|   |    |    | 2a | 3a |
|---|----|----|----|----|
| 1 | 5  | 78 | 58 | 6  |
| 2 | 10 | 99 | 71 | 11 |
| 3 | 20 | 99 | 68 | 21 |
| 4 | 40 | 99 | 54 | 38 |

Reaction conditions: **1a** (298 mg, 2.0 mmol), <sup>t</sup>BuOK (X mol%), TMDS (295.5 mg, 2.2 mmol, 1.1 equiv) and cyclohexane (4.0 mL), 80 °C, 12 h. Conversion and yield were determined by GC analysis with 1,2,4,5-tetramethylbenzene as internal standard. Reaction was quenched by HCl (aq.)/THF solution.

**Table S5 Screening of temperature**

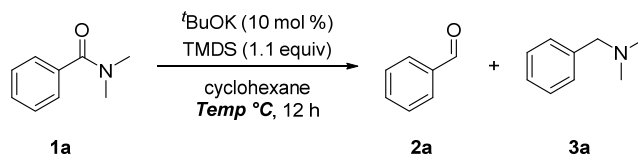

| Entry | Temp(°C)         | Conv. (%) | Yield (%) |    |
|-------|------------------|-----------|-----------|----|
|       |                  |           | 2a        | 3a |
| 1     | 35               | 96        | 76        | 5  |
| 2     | 50               | 98        | 72        | 9  |
| 3     | 80               | 99        | 71        | 11 |
| 4     | 100 <sup>a</sup> | 93        | 41        | 47 |

Reaction conditions: **1a** (298 mg, 2.0 mmol), <sup>t</sup>BuOK (22.4 mg, 0.2 mmol, 10 mol%), TMDS (295.5 mg, 2.2 mmol, 1.1 equiv) and cyclohexane (4.0 mL), 12 h. Conversion and yield were determined by GC analysis with 1,2,4,5-tetramethylbenzene as internal standard. Reaction was quenched by HCl (aq.)/THF solution. [a] *n*-heptane as solvent.

**Table S6 Screening of silane dosage**

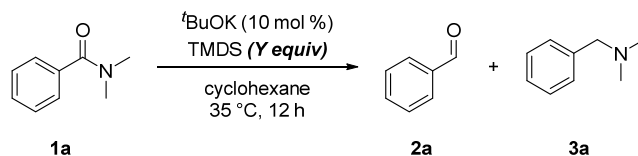

| Entry | Y (equiv) | Conv. (%) | Yield (%) |    |
|-------|-----------|-----------|-----------|----|
|       |           |           | 2a        | 7a |
| 1     | 1.1       | 96        | 76        | 5  |
| 2     | 1.5       | 99        | 78        | 4  |
| 3     | 2.1       | 99        | 71        | 7  |
| 4     | 4.1       | 99        | 68        | 18 |
| 5     | 0.8       | 64        | 57        | 3  |
| 6     | 0.6       | 49        | 43        | 2  |

Reaction conditions: **1a** (298 mg, 2.0 mmol), <sup>t</sup>BuOK (22.4 mg, 0.2 mmol, 10 mol%), TMDS (Y equiv) and cyclohexane (4.0 mL), 35 °C, 12 h. Conversion and yield were determined by GC analysis with 1,2,4,5-tetramethylbenzene as internal standard. Reaction was quenched by HCl (aq.)/THF solution.

### 3. Time-Course of Hydrosilylation Reduction

**Table S7 Time-course at 0.5 M concentration in cyclohexane**

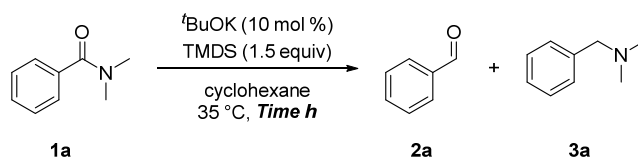

| Entry | Time (h) | Conv. (%) | Yield (%) |    |
|-------|----------|-----------|-----------|----|
|       |          |           | 2a        | 3a |
| 1     | 0.5      | 13        | 8         | 0  |
| 2     | 1.0      | 27        | 21        | 0  |
| 3     | 1.5      | 48        | 37        | 1  |
| 4     | 2.0      | 56        | 44        | 2  |
| 5     | 3.0      | 74        | 61        | 3  |
| 6     | 4.0      | 84        | 69        | 10 |
| 7     | 6.0      | 88        | 60        | 17 |
| 8     | 8.0      | 90        | 35        | 29 |
| 9     | 12.0     | 92        | 29        | 38 |

Reaction conditions: **1a** (298 mg, 2.0 mmol), <sup>t</sup>BuOK (22.4 mg, 0.2 mmol, 10 mol%), TMDS (402.9 mg, 3.0 mmol, 1.5 equiv) and cyclohexane (4.0 mL), 35 °C. Conversion and yield were determined by GC analysis with 1,2,4,5-tetramethylbenzene as internal standard. Reaction was quenched by HCl (aq.)/THF solution.

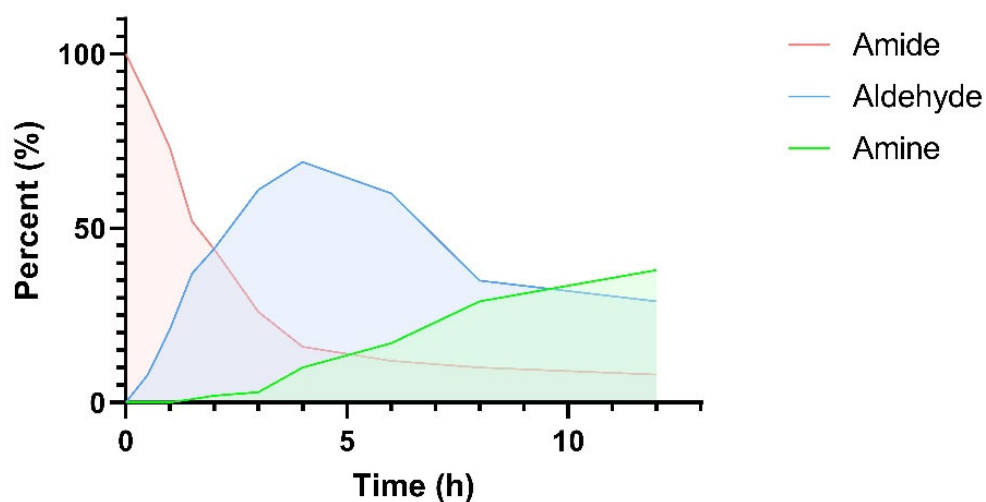

Figure S1. Time-course diagram of reduction at 0.5 M concentration in cyclohexane

Table S8 Time-course at 0.3 M concentration in cyclohexane

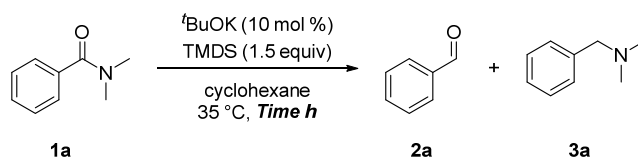

| Entry | Time (h) | Conv. (%) | Yield (%) |    |
|-------|----------|-----------|-----------|----|
|       |          |           | 2a        | 3a |
| 1     | 0.5      | 23        | 9         | 0  |
| 2     | 1.0      | 37        | 33        | 0  |

|   |      |    |    |   |
|---|------|----|----|---|
| 3 | 1.5  | 60 | 56 | 1 |
| 4 | 2.0  | 71 | 65 | 2 |
| 5 | 3.0  | 89 | 81 | 2 |
| 6 | 4.0  | 95 | 84 | 4 |
| 7 | 6.0  | 99 | 90 | 4 |
| 8 | 8.0  | 99 | 85 | 6 |
| 9 | 12.0 | 99 | 82 | 7 |

Reaction conditions: **1a** (149 mg, 1.0 mmol), <sup>t</sup>BuOK (11.2 mg, 0.1 mmol, 10 mol%), TMDS (201 mg, 1.5 mmol, 1.5 equiv) and cyclohexane (3.0 mL), 35 °C. Conversion and yield were determined by GC analysis with 1,2,4,5-tetramethylbenzene as internal standard. Reaction was quenched by HCl (aq.)/THF solution.

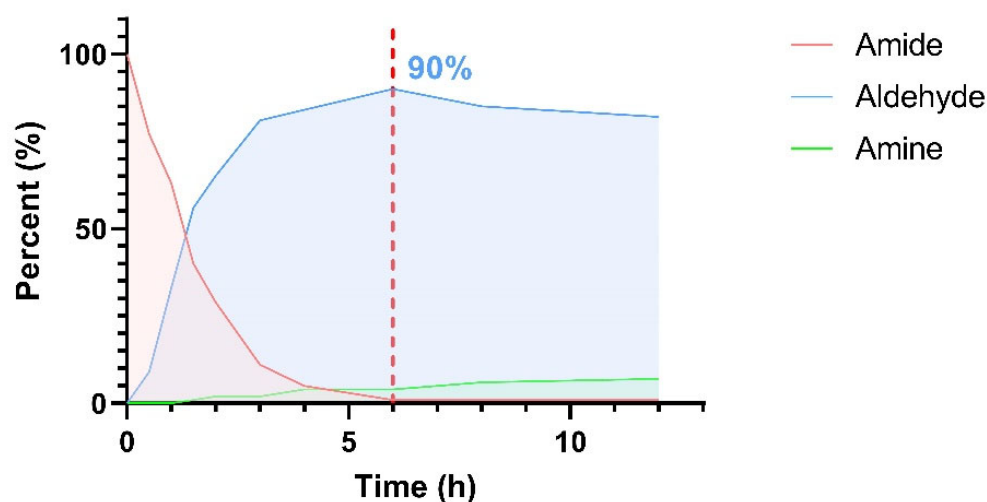

Figure S2. Time-course diagram of reduction at 0.3 M concentration in cyclohexane

Table S9 Time-course of **1n** at 0.3 M concentration in THF

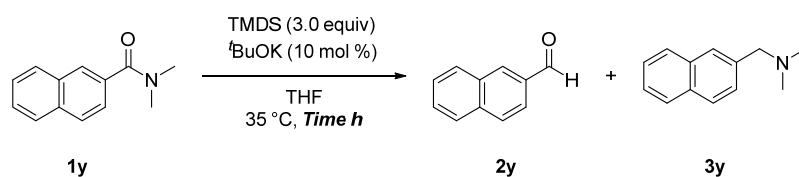

| Entry | Time (h) | Conv. (%) | Yield (%) |    |
|-------|----------|-----------|-----------|----|
|       |          |           | 2w        | 3w |
| 1     | 0        | 0         | 0         | 0  |
| 2     | 1        | 60        | 50        | 10 |
| 3     | 2        | 92        | 72        | 20 |
| 4     | 3        | 98        | 67        | 29 |
| 5     | 4        | 99        | 37        | 48 |
| 6     | 5        | 99        | 23        | 71 |
| 7     | 6        | 99        | 11        | 86 |
| 8     | 7        | 99        | 5         | 90 |
| 9     | 8        | 99        | 1         | 91 |

Reaction conditions: **1n** (199 mg, 1.0 mmol), <sup>t</sup>BuOK (11.2 mg, 0.1 mmol, 10 mol%), TMDS (402.9 mg, 3.0 mmol, 3.0 equiv) and THF (3.0 ml), 35 °C. Conversion and yield were determined by GC analysis with 1,2,4,5-tetramethylbenzene as internal standard. Reaction was quenched by HCl (aq.)/THF solution.

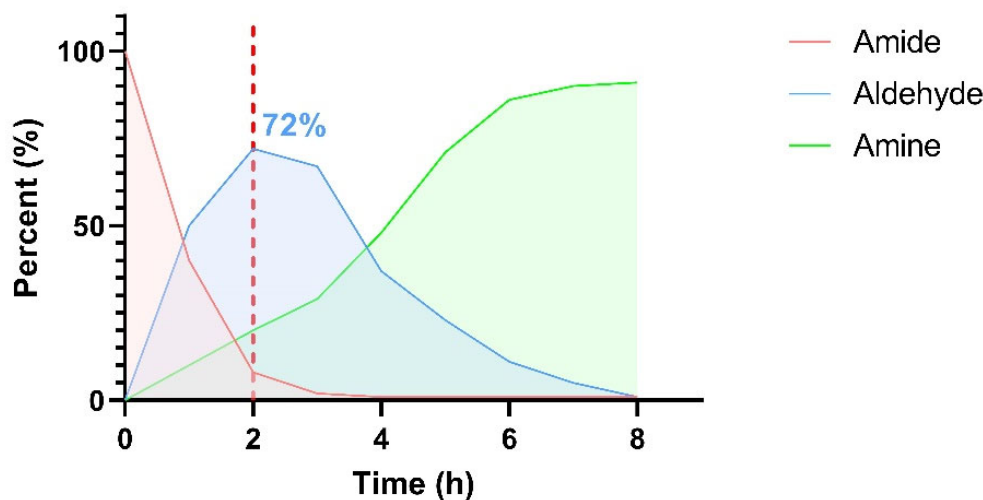

Figure S3. Time-course diagram of reduction at 0.3 M concentration in THF

## 4. Alkoxide-Catalyzed Hydrosilylation of Amides

### 4.1 General Experimental Procedures

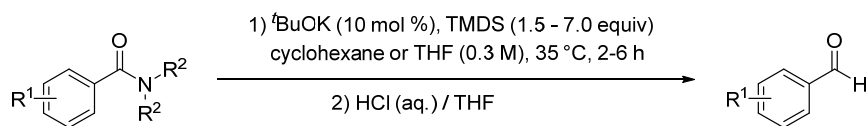

A dry reaction tube containing a magnetic stir bar was charged with amide (**1**, 1.0 mmol, 1.0 equiv) and <sup>t</sup>BuOK (11.2 mg, 0.1 mmol, 10 mol%), cyclohexane (3.0 mL) or THF (3.0 mL) was then added into the tube *via* syringe. TMDS was added dropwise into the tube slowly, the amount of TMDS depended on the kind of amide (the actual amount was listed in the manuscript). Then the tube was sealed with a rubber stopper and inserted into an oil bath preheated to 35 °C. The mixture was stirred for 2-6 h, removed from the oil bath, and allowed to cool to room temperature. HCl (aq.)/THF solution (*conc.* HCl : THF = 1 : 5, 2.0 mL) was added to quench the reaction for 10 min. The mixture was extracted with EtOAc (3.0 mL × 3), the combined organic phase was washed with brine and dried over Na<sub>2</sub>SO<sub>4</sub>. After removing the solvent under vacuum carefully, the residue was purified by column chromatography (silica gel) to give the product with Petroleum ether and EtOAc as eluent.

*Specially:* If the amide is liquid, the amide can be added dropwise after the solvent.

*Caution!* Combustible gas (Me<sub>2</sub>SiH<sub>2</sub>) is generated under standard conditions

### 4.2 Characterization of Aldehydes

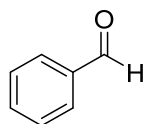



**Benzaldehyde (2a)**<sup>[1]</sup>: colorless liquid, the yields of **2a** prepared from various substituted amides are given in manuscript. 87% yield from **1a**.

**Purification**: flash column chromatography (300-400 mesh silica gel, PE : EA = 50 : 1).

**<sup>1</sup>H NMR (500 MHz, CDCl<sub>3</sub>)**: δ 10.00 (s, 1H), 7.90 – 7.88 (m, 2H), 7.65 – 7.62 (m, 1H), 7.55 – 7.52 (m, 2H).

**<sup>13</sup>C NMR (125 MHz, CDCl<sub>3</sub>)**: δ 192.5, 136.5, 134.6, 129.9, 129.1.

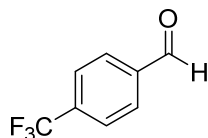

**4-(Trifluoromethyl)benzaldehyde (2b)**<sup>[2]</sup>: colorless liquid, 140 mg, 80% yield.

**Purification**: flash column chromatography (300-400 mesh silica gel, PE : EA = 50 : 1).

**<sup>1</sup>H NMR (500 MHz, CDCl<sub>3</sub>)**: δ 10.09 (s, 1H), 8.00 (d, *J* = 8.0 Hz, 2H), 7.80 (d, *J* = 8.0 Hz, 2H).

**<sup>13</sup>C NMR (125 MHz, CDCl<sub>3</sub>)**: δ 191.2, 138.8, 135.7 (q, <sup>2</sup>*J*<sub>C-F</sub> = 32.5 Hz), 130.0, 126.2 (q, <sup>3</sup>*J*<sub>C-F</sub> = 3.8 Hz), 123.6 (q, <sup>1</sup>*J*<sub>C-F</sub> = 271.2 Hz).

**<sup>19</sup>F NMR (470 MHz, CDCl<sub>3</sub>)**: δ -63.3.

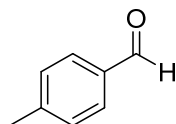

**4-Methylbenzaldehyde (2c)**<sup>[1]</sup>: colorless liquid, 108 mg, 90% yield.

**Purification**: flash column chromatography (300-400 mesh silica gel, PE : EA = 30 : 1).

**<sup>1</sup>H NMR (500 MHz, CDCl<sub>3</sub>)**: δ 9.96 (s, 1H), 7.78 (d, *J* = 8.0 Hz, 2H), 7.33 (d, *J* = 8.0 Hz, 2H), 2.44 (s, 3H).

**<sup>13</sup>C NMR (125 MHz, CDCl<sub>3</sub>)**: δ 192.1, 145.7, 134.3, 130.0, 129.8, 22.0.

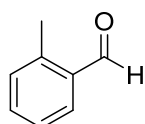

**2-Methylbenzaldehyde (2d)**<sup>[2]</sup>: colorless liquid, 86 mg, 72% yield.

**Purification**: flash column chromatography (300-400 mesh silica gel, PE : EA = 20 : 1).

**<sup>1</sup>H NMR (500 MHz, CDCl<sub>3</sub>)**: δ 10.28 (s, 1H), 7.81 (d, *J* = 7.5 Hz, 1H), 7.49 (t, *J* = 7.5 Hz, 1H), 7.37 (t, *J* = 7.5 Hz, 1H), 7.27 (d, *J* = 7.5 Hz, 1H), 2.69 (s, 3H).

**<sup>13</sup>C NMR (125 MHz, CDCl<sub>3</sub>)**: δ 192.9, 140.7, 134.3, 133.7, 132.1, 131.9, 126.4, 19.7.

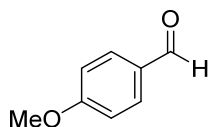

**4-Methoxybenzaldehyde (2f)**<sup>[1]</sup>: colorless liquid, 101 mg, 74% yield.

**Purification**: flash column chromatography (300-400 mesh silica gel, PE : EA = 10 : 1).

**<sup>1</sup>H NMR (500 MHz, CDCl<sub>3</sub>):** δ 9.82 (s, 1H), 7.77 (d, *J* = 8.5 Hz, 2H), 6.94 (d, *J* = 8.5 Hz, 2H), 3.82 (s, 3H).

**<sup>13</sup>C NMR (125 MHz, CDCl<sub>3</sub>):** δ 190.7, 164.6, 131.9, 129.9, 114.3, 55.5.

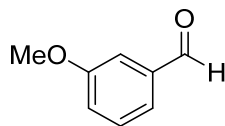

**3-Methoxybenzaldehyde (2g)**<sup>[3]</sup>: colorless liquid, 125 mg, 92% yield.

**Purification:** flash column chromatography (300-400 mesh silica gel, PE : EA = 10 : 1).

**<sup>1</sup>H NMR (500 MHz, CDCl<sub>3</sub>):** δ 9.88 (s, 1H), 7.38 – 7.30 (m, 3H), 7.10 – 7.07 (m, 1H), 3.77 (s, 3H).

**<sup>13</sup>C NMR (125 MHz, CDCl<sub>3</sub>):** δ 192.3, 160.3, 137.9, 130.2, 123.7, 121.7, 112.2, 55.6.

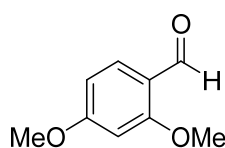

**2,4-Dimethoxybenzaldehyde (2h)**<sup>[4]</sup>: white solid, 150 mg, 90% yield, mp 58 – 60 °C.

**Purification:** flash column chromatography (300-400 mesh silica gel, PE : EA = 10 : 1).

**<sup>1</sup>H NMR (500 MHz, CDCl<sub>3</sub>):** δ 10.27 (s, 1H), 7.79 (d, *J* = 11.0 Hz, 1H), 6.53 (dd, *J* = 11.0, 3.0 Hz, 1H), 6.43 (d, *J* = 3.0 Hz, 1H), 3.89 (s, 3H), 3.86 (s, 3H).

**<sup>13</sup>C NMR (125 MHz, CDCl<sub>3</sub>):** δ 188.5, 166.3, 163.7, 130.9, 119.1, 105.9, 98.0, 55.74, 55.71.

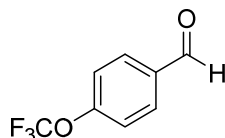

**4-(Trifluoromethoxy)benzaldehyde (2i)**<sup>[5]</sup>: colorless liquid, 173 mg, 91% yield.

**Purification:** flash column chromatography (300-400 mesh silica gel, PE : EA = 20 : 1).

**<sup>1</sup>H NMR (500 MHz, CDCl<sub>3</sub>):** δ 10.01 (s, 1H), 7.96 – 7.93 (m, 2H), 7.36 (d, *J* = 7.5 Hz, 2H).

**<sup>13</sup>C NMR (125 MHz, CDCl<sub>3</sub>):** δ 190.6, 153.7 (q, <sup>3</sup>*J*<sub>C-F</sub> = 2.0 Hz), 134.6, 131.7, 121.0, 120.4 (q, <sup>1</sup>*J*<sub>C-F</sub> = 257.9 Hz).

**<sup>19</sup>F NMR (470 MHz, CDCl<sub>3</sub>):** δ -57.6.

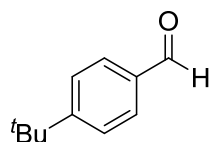

**4-(tert-Butyl)benzaldehyde (2j)**<sup>[4]</sup>: white solid, 148 mg, 91% yield, mp 148 – 150 °C.

**Purification:** flash column chromatography (300-400 mesh silica gel, PE : EA = 20 : 1).

**<sup>1</sup>H NMR (400 MHz, CDCl<sub>3</sub>):** δ 9.98 (s, 1H), 7.82 (d, *J* = 8.4 Hz, 2H), 7.55 (d, *J* = 8.4 Hz, 2H), 1.35 (s, 9H).

**<sup>13</sup>C NMR (100 MHz, CDCl<sub>3</sub>):** δ 192.2, 158.6, 134.2, 129.8, 126.1, 35.5, 31.2.

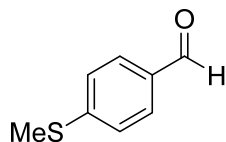

**4-(Methylthio)benzaldehyde (2k)**<sup>[3]</sup>: light yellow oil, 134 mg, 88% yield.

**Purification:** flash column chromatography (300-400 mesh silica gel, PE : EA = 5 : 1).

**<sup>1</sup>H NMR (400 MHz, CDCl<sub>3</sub>):** δ 9.91 (s, 1H), 7.76 (d, *J* = 8.4 Hz, 2H), 7.31 (d, *J* = 8.4 Hz, 2H), 2.52 (s, 3H).

**<sup>13</sup>C NMR (100 MHz, CDCl<sub>3</sub>):** δ 191.3, 148.0, 133.0, 130.1, 125.3, 14.8.

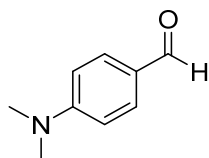

**4-(Dimethylamino)benzaldehyde (2l)**<sup>[6]</sup>: yellow solid, 107 mg, 72% yield, mp 70 – 72 °C.

**Purification:** flash column chromatography (300-400 mesh silica gel, PE : EA = 3 : 1).

**<sup>1</sup>H NMR (400 MHz, CDCl<sub>3</sub>):** δ 9.74 (s, 1H), 7.74 (d, *J* = 8.6 Hz, 2H), 6.70 (d, *J* = 8.6 Hz, 2H), 3.08 (s, 6H).

**<sup>13</sup>C NMR (100 MHz, CDCl<sub>3</sub>):** δ 190.4, 154.5, 132.1, 125.3, 111.1, 40.2.

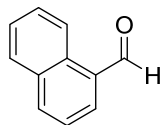

**1-Naphthaldehyde (2m)**<sup>[3]</sup>: yellow oil, 114 mg, 73% yield.

**Purification:** flash column chromatography (300-400 mesh silica gel, PE : EA = 5 : 1).

**<sup>1</sup>H NMR (500 MHz, CDCl<sub>3</sub>):** δ 10.39 (s, 1H), 9.26 – 9.25 (m, 1H), 8.08 – 8.07 (m, 1H), 7.98 – 7.95 (m, 1H), 7.91 – 7.90 (m, 1H), 7.70 – 7.67 (m, 1H), 7.62 – 7.60 (m, 2H).

**<sup>13</sup>C NMR (125 MHz, CDCl<sub>3</sub>):** δ 193.6, 136.7, 135.4, 133.8, 131.5, 130.6, 129.1, 128.6, 127.0, 125.0.

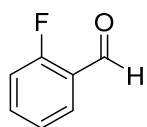

**2-Fluorobenzaldehyde (2n)**<sup>[7]</sup>: colorless liquid, 84 mg, 68% yield.

**Purification:** flash column chromatography (300-400 mesh silica gel, PE : EA = 20 : 1).

**<sup>1</sup>H NMR (500 MHz, CDCl<sub>3</sub>):** δ 10.33 (s, 1H), 7.85 – 7.82 (m, 1H), 7.60 – 7.55 (m, 1H), 7.25 – 7.22 (m, 1H), 7.16 – 7.12 (m, 1H).

**<sup>13</sup>C NMR (125 MHz, CDCl<sub>3</sub>):** δ 187.2 (d, <sup>3</sup>*J*<sub>C-F</sub> = 6.5 Hz), 164.7 (d, <sup>1</sup>*J*<sub>C-F</sub> = 257.1 Hz), 136.4 (d, <sup>3</sup>*J*<sub>C-F</sub> = 9.1 Hz), 128.8 (d, <sup>4</sup>*J*<sub>C-F</sub> = 1.9 Hz), 124.7 (d, <sup>3</sup>*J*<sub>C-F</sub> = 3.7 Hz), 124.2 (d, <sup>2</sup>*J*<sub>C-F</sub> = 8.0 Hz), 116.6 (d, <sup>2</sup>*J*<sub>C-F</sub> = 20.4 Hz).

**<sup>19</sup>F NMR (470 MHz, CDCl<sub>3</sub>):** δ -122.0.

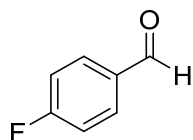

**4-Fluorobenzaldehyde (2o)**<sup>[3]</sup>: colorless liquid, 113 mg, 91% yield.

**Purification:** flash column chromatography (300-400 mesh silica gel, PE : EA = 30 : 1).

**<sup>1</sup>H NMR (500 MHz, CDCl<sub>3</sub>):** δ 9.97 (s, 1H), 7.93 – 7.90 (m, 2H), 7.24 – 7.20 (m, 2H).

**<sup>13</sup>C NMR (125 MHz, CDCl<sub>3</sub>):** δ 190.5, 166.5 (d, <sup>1</sup>J<sub>C-F</sub> = 255.1 Hz), 133.0 (d, <sup>3</sup>J<sub>C-F</sub> = 2.7 Hz), 132.2 (d, <sup>2</sup>J<sub>C-F</sub> = 9.6 Hz).

**<sup>19</sup>F NMR (470 MHz, CDCl<sub>3</sub>):** δ -102.4.

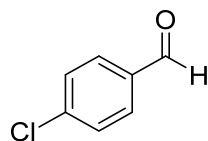

**4-Chlorobenzaldehyde (2p)**<sup>[3]</sup>: white solid, 118 mg, 84% yield, mp 44 – 46 °C.

**Purification:** flash column chromatography (300-400 mesh silica gel, PE : EA = 10 : 1).

**<sup>1</sup>H NMR (500 MHz, CDCl<sub>3</sub>):** δ 9.99 (s, 1H), 7.83 (d, *J* = 8.5 Hz, 2H), 7.52 (d, *J* = 8.5 Hz, 2H).

**<sup>13</sup>C NMR (125 MHz, CDCl<sub>3</sub>):** δ 191.0, 141.1, 134.9, 131.0, 129.6.

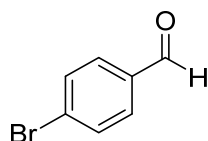

**4-Chlorobenzaldehyde (2q)**<sup>[3]</sup>: white solid, 115 mg, 62% yield, mp 53 – 55 °C.

**Purification:** flash column chromatography (300-400 mesh silica gel, PE : EA = 5 : 1).

**<sup>1</sup>H NMR (500 MHz, CDCl<sub>3</sub>):** δ 9.96 (s, 1H), 7.73 (d, *J* = 8.5 Hz, 2H), 6.67 (d, *J* = 8.5 Hz, 2H).

**<sup>13</sup>C NMR (125 MHz, CDCl<sub>3</sub>):** δ 191.2, 135.2, 132.5, 131.1, 129.9.

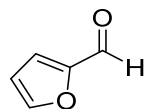

**Furan-2-carbaldehyde (2r)**<sup>[3]</sup>: yellow oil, 61 mg, 64% yield.

**Purification:** flash column chromatography (300-400 mesh silica gel, PE : EA = 20 : 1).

**<sup>1</sup>H NMR (500 MHz, CDCl<sub>3</sub>):** δ 9.58 (s, 1H), 7.63 (s, 1H), 7.20 – 7.19 (m, 1H), 6.54 – 6.53 (m, 1H).

**<sup>13</sup>C NMR (125 MHz, CDCl<sub>3</sub>):** δ 177.8, 152.9, 148.1, 121.2, 112.6.

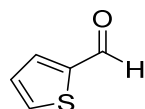

**Furan-2-carbaldehyde (2s)**<sup>[6]</sup>: orange oil, 85 mg, 76% yield.

**Purification:** flash column chromatography (300-400 mesh silica gel, PE : EA = 20 : 1).

**<sup>1</sup>H NMR (500 MHz, CDCl<sub>3</sub>):** δ 9.92 (s, 1H), 7.77 – 7.74 (m, 2H), 7.20 – 7.19 (m, 1H).

**<sup>13</sup>C NMR (125 MHz, CDCl<sub>3</sub>):** δ 183.1, 144.1, 136.4, 135.2, 128.4.

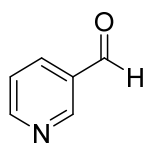

**Nicotinaldehyde (2t)**<sup>[3]</sup>: yellow oil, 91 mg, 85% yield.

**Purification:** flash column chromatography (300-400 mesh silica gel, PE : EA = 5 : 1).

**<sup>1</sup>H NMR (500 MHz, CDCl<sub>3</sub>):** δ 10.03 (s, 1H), 8.99 (s, 1H), 8.75 (d, *J* = 5.0 Hz, 1H), 8.08 (d, *J* = 7.5 Hz, 1H), 7.41 (dd, *J* = 8.0, 5.0 Hz, 1H).

**<sup>13</sup>C NMR (125 MHz, CDCl<sub>3</sub>):** δ 190.8, 154.7, 152.0, 135.8, 131.4, 124.0.

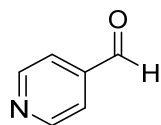

**Isonicotinaldehyde (2u)**<sup>[8]</sup>: yellow oil, 88 mg, 82% yield.

**Purification:** flash column chromatography (300-400 mesh silica gel, PE : EA = 5 : 1).

**<sup>1</sup>H NMR (500 MHz, CDCl<sub>3</sub>):** δ 9.99 (s, 1H), 8.79 – 8.78 (m, 2H), 7.62 – 7.61 (m, 2H).

**<sup>13</sup>C NMR (125 MHz, CDCl<sub>3</sub>):** δ 191.5, 151.2, 141.4, 122.0.

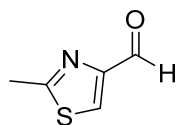

**2-Methylthiazole-4-carbaldehyde (2v)**<sup>[9]</sup>: yellow solid, 108 mg, 85% yield, mp 46 – 48 °C.

**Purification:** flash column chromatography (300-400 mesh silica gel, PE : EA = 5 : 1).

**<sup>1</sup>H NMR (500 MHz, CDCl<sub>3</sub>):** δ 9.96 (s, 1H), 8.04 (s, 1H), 2.77 (s, 3H).

**<sup>13</sup>C NMR (125 MHz, CDCl<sub>3</sub>):** δ 184.5, 167.8, 154.8, 128.4, 19.4.

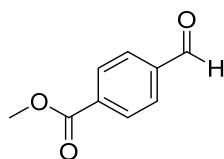

**Methyl 4-formylbenzoate (2w)**<sup>[3]</sup>: white solid, 71 mg, 43% yield, mp 83 – 85 °C.

**Purification:** flash column chromatography (300-400 mesh silica gel, PE : EA = 5 : 1).

**<sup>1</sup>H NMR (500 MHz, CDCl<sub>3</sub>):** δ 10.10 (s, 1H), 8.17 (d, *J* = 8.5 Hz, 2H), 7.93 (d, *J* = 8.5 Hz, 2H), 3.96 (s, 3H).

**<sup>13</sup>C NMR (125 MHz, CDCl<sub>3</sub>):** δ 191.7, 166.2, 139.3, 135.2, 130.3, 129.7, 129.6, 52.7.

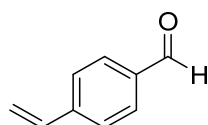

**4-Vinylbenzaldehyde (2x)**<sup>[10]</sup>: light yellow oil, 41 mg, 31% yield.

**Purification:** flash column chromatography (300-400 mesh silica gel, PE : EA = 10 : 1).

**<sup>1</sup>H NMR (500 MHz, CDCl<sub>3</sub>):** δ 9.98 (s, 1H), 7.84 (d, *J* = 8.5 Hz, 2H), 7.55 (d, *J* = 8.5 Hz, 2H), 6.77 (dd, *J* = 11.0 Hz, 18.0 Hz, 1H), 5.91 (d, *J* = 18.0 Hz, 1H), 5.44 (d, *J* = 11.0 Hz, 1H).

**<sup>13</sup>C NMR (125 MHz, CDCl<sub>3</sub>):** δ 191.9, 143.6, 136.0, 135.8, 130.2, 126.9, 117.6.

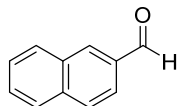

**2-Naphthaldehyde (2y)**<sup>[3]</sup>: white solid, 111 mg, 71% yield, mp 58 – 60 °C.

**Purification:** flash column chromatography (300-400 mesh silica gel, PE : EA = 5 : 1).

**<sup>1</sup>H NMR (500 MHz, CDCl<sub>3</sub>):** δ 10.16 (s, 1H), 8.34 (s, 1H), 8.02 – 8.00 (m, 1H), 7.97 – 7.90 (m, 3H), 7.66 – 7.63 (m, 1H), 7.61 – 7.58 (m, 1H).

**<sup>13</sup>C NMR (125 MHz, CDCl<sub>3</sub>):** δ 192.4, 136.6, 134.7, 134.3, 132.8, 129.7, 129.25, 129.23, 128.2, 127.2, 122.9.

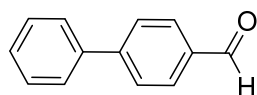

**[1,1'-Biphenyl]-4-carbaldehyde (2z)**<sup>[3]</sup>: white solid, 128 mg, 70% yield, mp 54 – 56 °C.

**Purification:** flash column chromatography (300-400 mesh silica gel, PE : EA = 10 : 1).

**<sup>1</sup>H NMR (400 MHz, CDCl<sub>3</sub>):** δ 10.06 (s, 1H), 7.95 (d, *J* = 8.0 Hz, 2H), 7.75 (d, *J* = 8.0 Hz, 2H), 7.64 (d, *J* = 7.6 Hz, 2H), 7.49 (t, *J* = 7.6 Hz, 2H), 7.42 (t, *J* = 7.6 Hz, 1H).

**<sup>13</sup>C NMR (100 MHz, CDCl<sub>3</sub>):** δ 192.0, 147.3, 139.8, 135.3, 130.3, 129.1, 128.6, 127.8, 127.4.

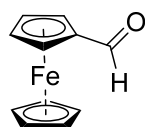

**Ferrocenecarboxaldehyde (2aa)**<sup>[11]</sup>: orange solid, 150 mg, 70% yield, mp 115 – 117 °C.

**Purification:** flash column chromatography (300-400 mesh silica gel, PE : EA = 10 : 1).

**<sup>1</sup>H NMR (400 MHz, CDCl<sub>3</sub>):** δ 9.95 (s, 1H), 4.79 (t, *J* = 2.0 Hz, 2H), 4.60 (t, *J* = 2.0 Hz, 2H), 4.27 (s, 5H).

**<sup>13</sup>C NMR (100 MHz, CDCl<sub>3</sub>):** δ 193.6, 77.5, 76.8, 73.3, 69.8.

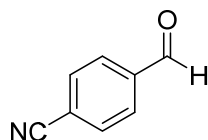

**4-Formylbenzonitrile (2bb)**<sup>[3]</sup>: white solid, 99 mg, 76% yield, mp 98 – 100 °C.

**Purification:** flash column chromatography (300-400 mesh silica gel, PE : EA = 5 : 1).

**<sup>1</sup>H NMR (500 MHz, CDCl<sub>3</sub>):** δ 10.10 (s, 1H), 8.00 (d, *J* = 8.0 Hz, 2H), 7.85 (d, *J* = 8.0 Hz, 2H).

**<sup>13</sup>C NMR (125 MHz, CDCl<sub>3</sub>):** δ 190.7, 138.9, 133.0, 130.0, 117.8, 117.7.

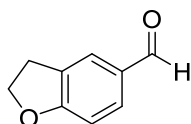

**2,3-Dihydrobenzofuran-5-carbaldehyde (2cc)**<sup>[12]</sup>: white solid, 104 mg, 70% yield, mp 189 – 191 °C.

**Purification:** flash column chromatography (300-400 mesh silica gel, PE : EA = 3 : 1).

**<sup>1</sup>H NMR (500 MHz, CDCl<sub>3</sub>):** δ 9.81 (s, 1H), 7.73 (s, 1H), 7.65 (d, *J* = 8.0 Hz, 1H), 6.85 (d, *J* = 8.0 Hz, 1H), 4.67 (t, *J* = 8.5 Hz, 2H), 3.25 (t, *J* = 8.5 Hz, 2H).

**<sup>13</sup>C NMR (125 MHz, CDCl<sub>3</sub>):** δ 190.7, 165.7, 133.1, 130.5, 128.5, 126.0, 109.7, 72.5, 28.8.

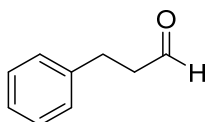

**3-Phenylpropanal (2dd)**<sup>[6]</sup>: colorless liquid, 83 mg, 62% yield.

**Purification:** flash column chromatography (300-400 mesh silica gel, PE : EA = 5 : 1).

**<sup>1</sup>H NMR (500 MHz, CDCl<sub>3</sub>):** δ 9.82 (s, 1H), 7.34 – 7.31 (m, 2H), 7.25 – 7.21 (m, 3H), 2.98 (t, *J* = 7.5 Hz, 2H), 2.78 (t, *J* = 7.5 Hz, 2H).

**<sup>13</sup>C NMR (125 MHz, CDCl<sub>3</sub>):** δ 201.5, 140.4, 128.6, 128.3, 126.3, 45.2, 28.1.

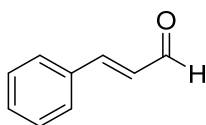

**Cinnamaldehyde (2ee)**<sup>[6]</sup>: colorless liquid, 71 mg, 53% yield.

**Purification:** flash column chromatography (300-400 mesh silica gel, PE : EA = 5 : 1).

**<sup>1</sup>H NMR (500 MHz, CDCl<sub>3</sub>):** δ 9.70 (d, *J* = 8.0 Hz, 1H), 7.57 – 7.55 (m, 2H), 7.49 – 7.46 (m, 1H), 7.44 – 7.42 (m, 3H), 6.74 – 6.69 (m, 1H).

**<sup>13</sup>C NMR (125 MHz, CDCl<sub>3</sub>):** δ 193.8, 152.9, 134.1, 131.4, 129.2, 128.7, 128.6.

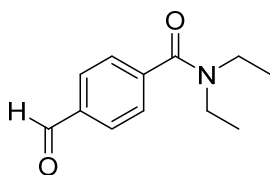

***N,N*-Diethyl-4-formylbenzamide (2nn)**<sup>[13]</sup>: yellow oil, 172 mg, 84% yield in cyclohexane; 155 mg, 76% yield in THF.

**Purification:** flash column chromatography (300-400 mesh silica gel, PE : EA = 3 : 1).

**<sup>1</sup>H NMR (500 MHz, CDCl<sub>3</sub>):** δ 10.02 (s, 1H), 7.90 (d, *J* = 8.5 Hz, 2H), 7.51 (d, *J* = 8.5 Hz, 2H), 3.73 (q, *J* = 7.5 Hz, 2H), 3.54 (q, *J* = 7.5 Hz, 2H), 1.24 (t, *J* = 8.5 Hz, 3H), 1.01 (t, *J* = 8.5 Hz, 3H).

**<sup>13</sup>C NMR (125 MHz, CDCl<sub>3</sub>):** δ 191.7, 170.0, 143.1, 136.6, 130.0, 127.0, 43.3, 39.5, 14.3, 13.0.

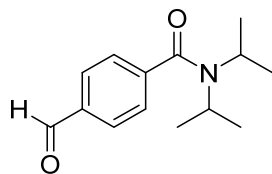

**4-Formyl-*N,N*-diisopropylbenzamide (2pp)**<sup>[14]</sup>: white solid: 189 mg, 81% yield, mp 83 – 85 °C.

**Purification:** flash column chromatography (300-400 mesh silica gel, PE : EA = 3 : 1).

**<sup>1</sup>H NMR (500 MHz, CDCl<sub>3</sub>):** δ 10.03 (s, 1H), 7.91 (d, *J* = 7.5 Hz, 2H), 7.46 (d, *J* = 7.5 Hz, 2H), 3.73 (s, 1H), 3.54 (s, 1H), 1.55 (s, 6H), 1.15 (s, 6H).

**<sup>13</sup>C NMR (125 MHz, CDCl<sub>3</sub>):** δ 191.7, 169.7, 144.5, 136.3, 130.2, 126.3, 51.1, 46.2, 20.7.

### 4.3 Tandem Reduction and Nucleophilic Attack of Alkyl Amides and Lactams

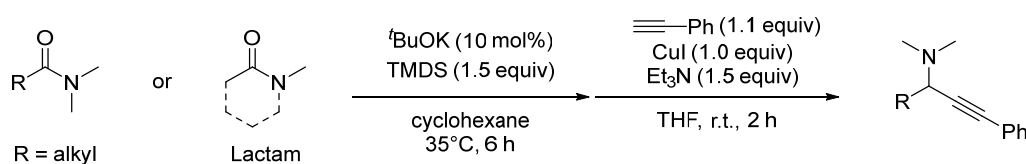

A dry reaction tube containing a magnetic stir bar was charged with amide (**1**, 1.0 mmol, 1.0 equiv) and <sup>t</sup>BuOK (11.2 mg, 0.1 mmol, 0.1 equiv), cyclohexane (3.0 mL) was then added into the tube *via* syringe. TMDS (201 mg, 1.5 mmol, 1.5 equiv) was added dropwise into the tube slowly. Then the tube was sealed with a rubber stopper and inserted into an oil bath preheated to 35 °C. The mixture was stirred for 6 h, removed from the oil bath, and allowed to cool to room temperature. Then the mixture was transferred into another reaction tube containing a magnetic stir bar which was charged with alkyne (1.1 mmol, 1.1 equiv), CuI (190 mg, 1.0 mmol, 1.0 equiv), Et<sub>3</sub>N (152 mg, 1.5 mmol, 1.5 equiv) and THF (4.0 mL). The reaction mixture was quenched by addition of 15% KOH solution and extracted with EtOAc (5.0 mL × 3). The combined organic phase was washed with brine and dried over Na<sub>2</sub>SO<sub>4</sub>. After removing the solvent under vacuum, the residue was purified by column chromatography (silica gel) to give the product with Petroleum ether and EtOAc as eluent.

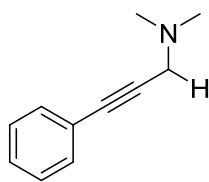

***N,N*-Dimethyl-3-phenylprop-2-yn-1-amine (4qq)**<sup>[15]</sup>: pale orange oil: 133 mg, 84% yield.

**Purification:** flash column chromatography (300-400 mesh silica gel, PE : EA = 1 : 2).

**<sup>1</sup>H NMR (400 MHz, CDCl<sub>3</sub>):** δ 7.45 – 7.43 (m, 2H), 7.31 – 7.28 (m, 3H), 3.47 (s, 2H), 2.37 (s, 6H).

**<sup>13</sup>C NMR (100 MHz, CDCl<sub>3</sub>):** δ 131.8, 128.4, 128.1, 123.4, 85.4, 84.7, 48.7, 44.4.

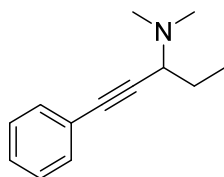

***N,N*-Dimethyl-1-phenylpent-1-yn-3-amine (4rr)**<sup>[16]</sup>: pale orange oil: 142 mg, 76% yield.



**Purification:** flash column chromatography (300-400 mesh silica gel, PE : EA= 1 : 2).

**<sup>1</sup>H NMR (400 MHz, CDCl<sub>3</sub>):** δ 7.45 – 7.42 (m, 2H), 7.31 – 7.28 (m, 3H), 3.43 (t, *J* = 7.2 Hz, 1H), 2.31 (s, 6H), 1.75 – 1.68 (m, 2H), 1.07 (t, *J* = 7.2 Hz, 3H).

**<sup>13</sup>C NMR (100 MHz, CDCl<sub>3</sub>):** δ 131.9, 128.4, 128.0, 123.6, 87.1, 86.1, 60.1, 41.7, 27.3, 11.5.

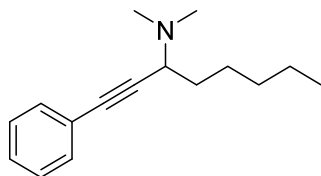

***N,N*-Dimethyl-1-phenyloct-1-yn-3-amine (4ss):** colorless oil: 170 mg, 74% yield.

**Purification:** flash column chromatography (300-400 mesh silica gel, PE : EA= 5 : 1).

**<sup>1</sup>H NMR (400 MHz, CDCl<sub>3</sub>):** δ 7.45 – 7.41 (m, 2H), 7.31 – 7.28 (m, 3H), 3.51 (t, *J* = 7.6 Hz, 1H), 2.32 (s, 6H), 1.73 – 1.66 (m, 2H), 1.59 – 1.44 (m, 2H), 1.37 – 1.33 (m, 4H), 0.91 (t, *J* = 6.8 Hz, 3H).

**<sup>13</sup>C NMR (100 MHz, CDCl<sub>3</sub>):** δ 131.9, 128.3, 128.0, 123.6, 87.2, 86.1, 58.4, 41.6, 34.1, 31.8, 26.5, 22.7, 14.2.

**IR (KBr)  $\nu$ (cm<sup>-1</sup>):** 3419, 2935, 1597, 1489, 1467, 1456, 1259, 1070, 1042, 1028, 803, 755.

**HRMS – ESI (m/z):** [M + H]<sup>+</sup> called for C<sub>16</sub>H<sub>24</sub>N, 230.1909, found 230.1916.

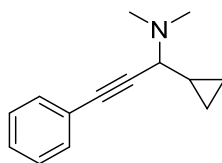

**1-Cyclopropyl-*N,N*-dimethyl-3-phenylprop-2-yn-1-amine (4tt):** colorless oil: 187 mg, 94% yield.

**Purification:** flash column chromatography (300-400 mesh silica gel, PE : EA= 1 : 2).

**<sup>1</sup>H NMR (400 MHz, CDCl<sub>3</sub>):** δ 7.45 – 7.40 (m, 2H), 7.31 – 7.27 (m, 3H), 3.51 (d, *J* = 5.6 Hz, 1H), 2.39 (s, 6H), 1.15 – 1.07 (m, 1H), 0.63 – 0.49 (m, 3H), 0.44 – 0.38 (m, 1H).

**<sup>13</sup>C NMR (100 MHz, CDCl<sub>3</sub>):** δ 131.9, 128.4, 128.1, 123.4, 86.5, 84.3, 61.7, 42.0, 13.6, 3.2, 2.5.

**IR (KBr)  $\nu$ (cm<sup>-1</sup>):** 3419, 3080, 3003, 2965, 2924, 1597, 1489, 1469, 1454, 1357, 1302, 1259, 1030, 914, 756.

**HRMS – ESI (m/z):** [M + H]<sup>+</sup> called for C<sub>14</sub>H<sub>18</sub>N, 200.1439, found 200.1440.

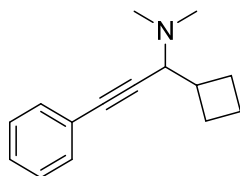

**1-Cyclobutyl-*N,N*-dimethyl-3-phenylprop-2-yn-1-amine (4uu):** colorless oil: 151 mg, 71% yield.

**Purification:** flash column chromatography (300-400 mesh silica gel, PE : EA= 1 : 2).

**<sup>1</sup>H NMR (400 MHz, CDCl<sub>3</sub>):** δ 7.46 – 7.42 (m, 2H), 7.31 – 7.28 (m, 3H), 3.48 (d, *J* = 8.4 Hz, 1H), 2.68 – 2.58 (m, 1H), 2.29 (s, 6H), 2.13 – 1.98 (m, 4H), 1.86 – 1.79 (m, 2H).

**<sup>13</sup>C NMR (100 MHz, CDCl<sub>3</sub>):** δ 131.9, 128.4, 128.0, 123.6, 86.9, 85.5, 64.1, 42.0, 38.3, 26.5, 26.3, 18.3.

**IR (KBr)  $\nu$ (cm<sup>-1</sup>):** 3423, 3079, 2973, 2937, 2860, 2822, 2823, 2778, 1597, 1488, 1468, 1454, 1442, 1330, 1272, 1257, 1016, 755.

**HRMS – ESI (m/z):** [M + H]<sup>+</sup> called for C<sub>15</sub>H<sub>19</sub>N, 214.1596, found 214.1600.

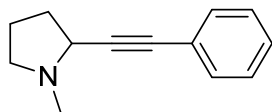

**1-Methyl-2-(phenylethynyl)pyrrolidine (4vv)**<sup>[17]</sup>: pale orange oil: 57 mg, 31% yield.

**Purification:** flash column chromatography (300-400 mesh silica gel, PE : EA : MeOH= 1 : 10 : 0.05).

**<sup>1</sup>H NMR (400 MHz, CDCl<sub>3</sub>):** δ 7.45 – 7.40 (m, 2H), 7.31 – 7.27 (m, 3H), 3.39 (t, *J* = 6.8 Hz, 1H), 2.97 – 2.92 (m, 1H), 2.51 (s, 3H), 2.48 – 2.44 (m, 1H), 2.26 – 2.18 (m, 1H), 2.08 – 1.91 (m, 2H), 1.87 – 1.78 (m, 1H).

**<sup>13</sup>C NMR (100 MHz, CDCl<sub>3</sub>):** δ 131.8, 128.3, 128.1, 123.3, 88.5, 84.7, 57.2, 54.9, 39.9, 32.4, 22.5.

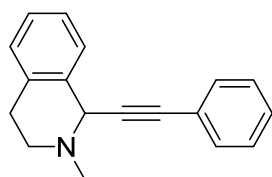

**2-Methyl-1-(phenylethynyl)-1,2,3,4-tetrahydroisoquinoline (4ww)**<sup>[18]</sup>: pale yellow oil: 210 mg, 85% yield.

**Purification:** flash column chromatography (300-400 mesh silica gel, PE : EA= 5 : 1).

**<sup>1</sup>H NMR (400 MHz, CDCl<sub>3</sub>):** δ 7.43 – 7.40 (m, 2H), 7.37 – 7.33 (m, 1H), 7.27 – 7.23 (m, 3H), 7.20 – 7.15 (m, 2H), 7.13 – 7.10 (m, 1H), 4.70 (s, 1H), 3.08 – 2.85 (m, 3H), 2.73 – 2.67 (m, 1H), 2.62 (s, 3H).

**<sup>13</sup>C NMR (100 MHz, CDCl<sub>3</sub>):** δ 135.3, 133.6, 131.9, 129.0, 128.3, 128.1, 127.7, 127.1, 126.0, 123.3, 87.6, 86.4, 57.1, 48.8, 43.9, 28.9.

#### 4.4 Unsuccessful Substrates

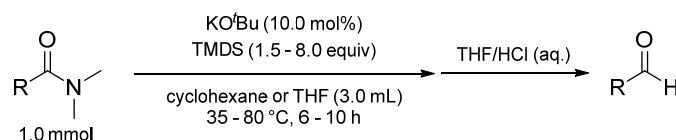

| R/Amide | Solvent     | TMDS (X equiv) | Temperature (°C) | Result      |
|---------|-------------|----------------|------------------|-------------|
|         | cyclohexane | 1.5            | 35               | Insoluble   |
|         | THF         | 8.0            | 80               | No Reaction |
|         | cyclohexane | 1.5            | 35               | Insoluble   |
|         | THF         | 8.0            | 80               | No Reaction |
|         | cyclohexane | 1.5            | 35               | Insoluble   |

|                                                                                     |             |     |    |              |
|-------------------------------------------------------------------------------------|-------------|-----|----|--------------|
| 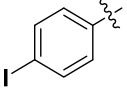   | THF         | 8.0 | 80 | No Reaction  |
|    | cyclohexane | 1.5 | 35 | Insoluble    |
|                                                                                     | THF         | 8.0 | 80 | Conv.% <10%  |
|    | cyclohexane | 1.5 | 35 | Insoluble    |
|                                                                                     | THF         | 8.0 | 80 | Conv.% = 15% |
|    | cyclohexane | 1.5 | 35 | Conv.% <10%  |
|                                                                                     | THF         | 8.0 | 80 | Conv.% <10%  |
|    | cyclohexane | 1.5 | 35 | Insoluble    |
|                                                                                     | THF         | 8.0 | 80 | Conv.% <10%  |
|   | cyclohexane | 1.5 | 35 | Insoluble    |
|                                                                                     | THF         | 8.0 | 80 | No Reaction  |
|  | cyclohexane | 1.5 | 35 | Insoluble    |
|                                                                                     | THF         | 8.0 | 80 | No Reaction  |
|  | cyclohexane | 1.5 | 35 | Conv.% <10%  |
|                                                                                     | THF         | 8.0 | 80 | No Reaction  |
|  | cyclohexane | 1.5 | 35 | No Detection |
|                                                                                     | THF         | 8.0 | 80 | No Detection |
|  | cyclohexane | 1.5 | 35 | Insoluble    |
|                                                                                     | THF         | 8.0 | 80 | No Reaction  |
|  | cyclohexane | 1.5 | 35 | Insoluble    |
|                                                                                     | THF         | 8.0 | 80 | No Reaction  |
|                                                                                     | cyclohexane | 1.5 | 35 | Insoluble    |

|                                                                                   |             |     |    |                                                                                            |
|-----------------------------------------------------------------------------------|-------------|-----|----|--------------------------------------------------------------------------------------------|
| 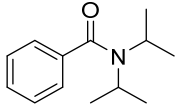 | THF         | 8.0 | 80 | No Reaction                                                                                |
|  | cyclohexane | 1.5 | 35 | No Reaction                                                                                |
|                                                                                   | THF         | 8.0 | 80 | No Reaction                                                                                |
|  | cyclohexane | 1.5 | 35 | Insoluble                                                                                  |
|                                                                                   | THF         | 8.0 | 80 | No Reaction                                                                                |
|  | THF         | 2.0 | 35 | <br>57% |

For the substrates **1w** and **1x**

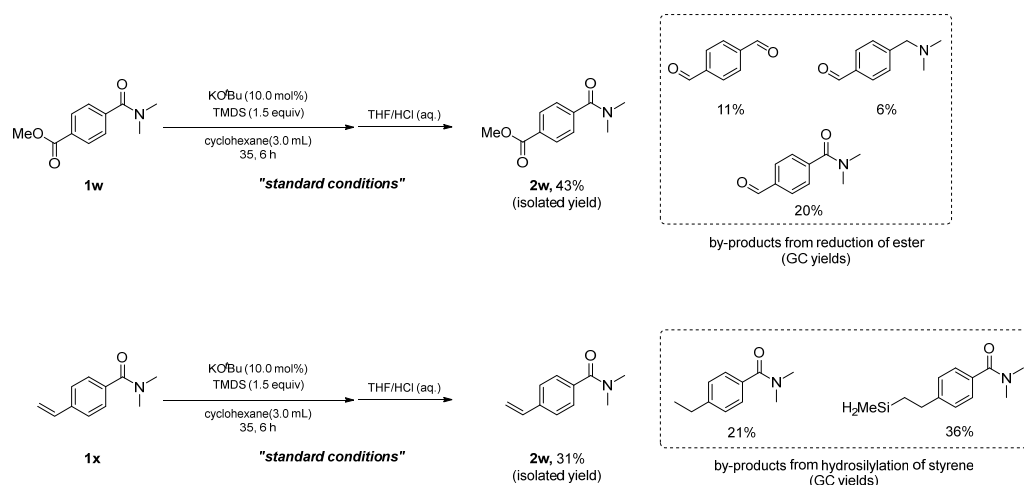

## 5. Competitive Experiments

**Experiment Procedure:** A dry reaction tube containing a magnetic stir bar was charged with amide *N,N*-dimethylbenzamide (**1a**, 149 mg, 1.0 mmol, 1.0 equiv), additive (1.0 equiv) and <sup>t</sup>BuOK (11.2 mg, 0.1 mmol, 0.1 equiv), THF (3.0 mL) was then added into the tube *via* syringe. TMDS (402 mg, 3.0 mmol, 3.0 equiv) was added dropwise into the tube slowly. Then the tube was sealed with a rubber stopper and inserted into an oil bath preheated to 35 °C. The mixture was stirred for 6 h, removed from the oil bath, and allowed to cool to the room temperature. HCl (aq.)/THF solution (*conc.* HCl : THF = 1 : 5, 2.0 mL) was added to quench the reaction for 10 min. The mixture was extracted with EtOAc (3.0 mL × 3), the combined organic phase was washed by brine and dried over Na<sub>2</sub>SO<sub>4</sub>. After removing the solvent under vacuum, the residue was purified by column chromatography (silica gel) to give **1a**, **2a** and additive.

**Result:** Under standard conditions (Part 4.4 of Supporting Information), most of the amides which are

insoluble in cyclohexane cannot be reduced successfully, including the amides bearing nitro, iodine, ketones, cyano, and methylsulfonyl. In order to understand whether the failures are caused by poor solubility, we change the solvent into THF to exclude the differences in solubility. Delightedly, model amide **1a** also can be reduced in good conversion but moderate chemoselectivity to give aldehyde. From the Table S9, we observed that cyano group cannot inhibit the model reaction, indicating that the amide **2bb** cannot be reduced, just because of its poor solubility; however, other additives, such as nitrobenzene, iodobenzene, benzenesulfone, and acetophenone, completely inhibited the occurrence of model reaction, and the significant reduction of this equivalent of additives were not detected. Based on the following studies on mechanism, we proposed a reasonable explanation that these strongly coordinative groups can competitively hinder the approach of amide to silane, thereby the disproportionation of TMDS is difficult to occur, and the reduction fail.

**Table S10 Competitive Experiments**

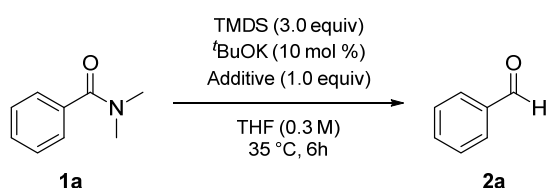

| Entry | Additive                          | Yield% of <b>2a</b> | Additive recovery (%) | Conv. % of <b>1a</b> |
|-------|-----------------------------------|---------------------|-----------------------|----------------------|
| 1     | none                              | 74                  | 0                     | >99                  |
| 2     | PhNO <sub>2</sub>                 | 0                   | 99                    | 0                    |
| 3     | PhI                               | 0                   | 96                    | 0                    |
| 4     | PhSO <sub>2</sub> CH <sub>3</sub> | 0                   | 87                    | 0                    |
| 5     | PhCN                              | 62                  | 99                    | 94                   |
| 6     | PhCOCH <sub>3</sub>               | 0                   | 91                    | 6                    |

## 6. Mechanistic Experiments

### 6.1 NMR Analysis

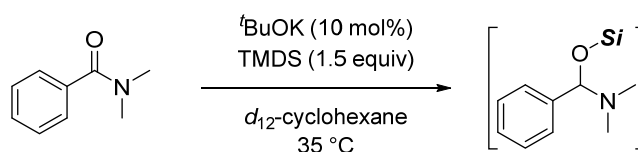

A dry reaction tube containing a magnetic stir bar was charged with *N,N*-dimethylbenzamide (**1**, 1.0 mmol, 1.0 equiv) and <sup>t</sup>BuOK (0.1 mmol, 0.1 equiv), *d*<sub>12</sub>-cyclohexane (3.0 mL) was then added into the tube *via* syringe. TMDS was added dropwise into the tube slowly. Then the tube was sealed with a rubber stopper and inserted into an oil bath preheated to 35 °C. The reaction was monitored by <sup>1</sup>H NMR at reaction time of 10 min, 120 min, 360 min, 600 min and 1440 min, respectively.

From the spectrum, *N,N*-dimethylbenzamide was consumed (the peak at 3.8 ppm gradually disappears) in 6 h, the intermediate was gradually formed at the same time (the peak at 5.5 ppm appears). After 1440 min (24 h), the disappearance of the peak at 5.5 ppm meant that the intermediate was further transformed

completely to amine. By the comparison with prior reports<sup>[19]</sup>, this intermediate was identified as the hemiaminal rather than imine (because there is not  $\alpha$ -H, the formation of enamine is impossible). Also from the spectrum, an unusual phenomenon was appeared that the original TMDS (the peak at 4.7 ppm) consumed rapidly in initial minutes and completely converted into newly active Si-H compound (the peak at 3.8 ppm), which was identified as  $\text{Me}_2\text{SiH}_2$ . Although  $\text{Me}_2\text{SiH}_2$  is gas at room temperature, it can still dissolve well in organic solvents, like cyclohexane and THF, and thus can maintain a comparative low concentration which is benefited for the chemoselective reduction, indeed, the integral of  $\text{Me}_2\text{SiH}_2$  was just half of the integral of original TMDS.

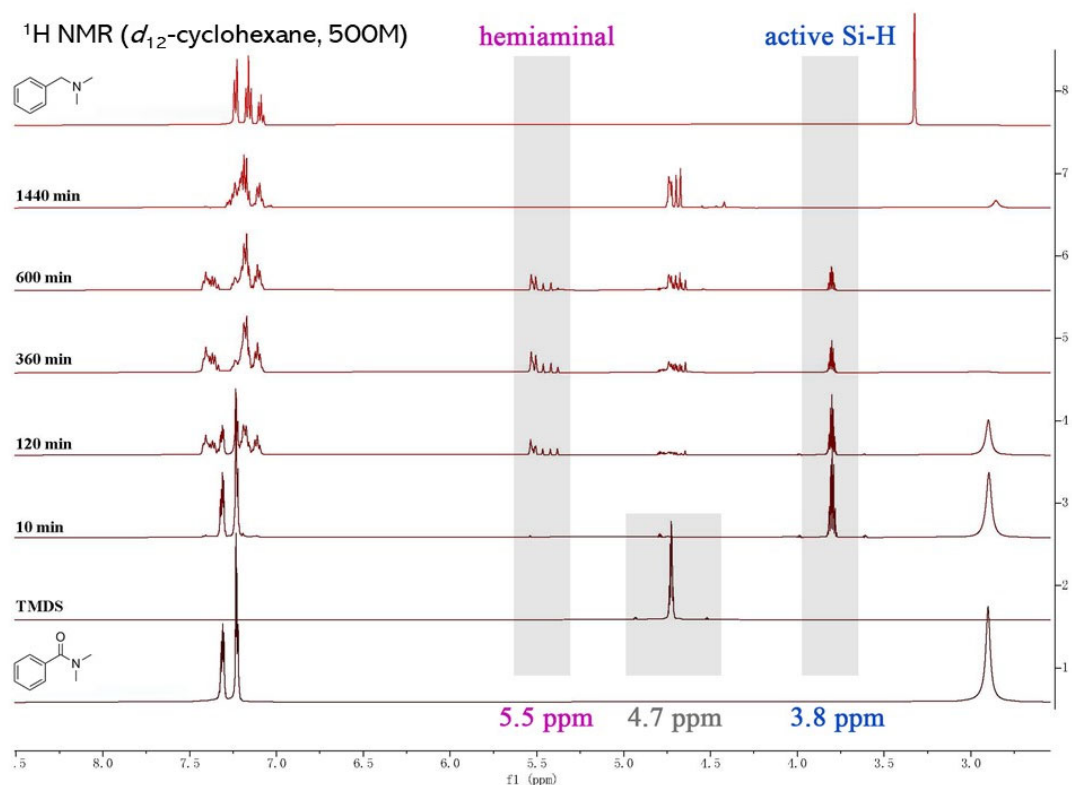

**Figure S4.**  $^1\text{H}$  NMR experiments of hydrosilylation reduction of *N,N*-dimethylbenzamide

In order to further clarify this special activation process of silane, we also monitored the reaction by  $^{29}\text{Si}$  NMR at reaction time of 10 min, 120 min, 360 min, 600 min and 1440 min, respectively.

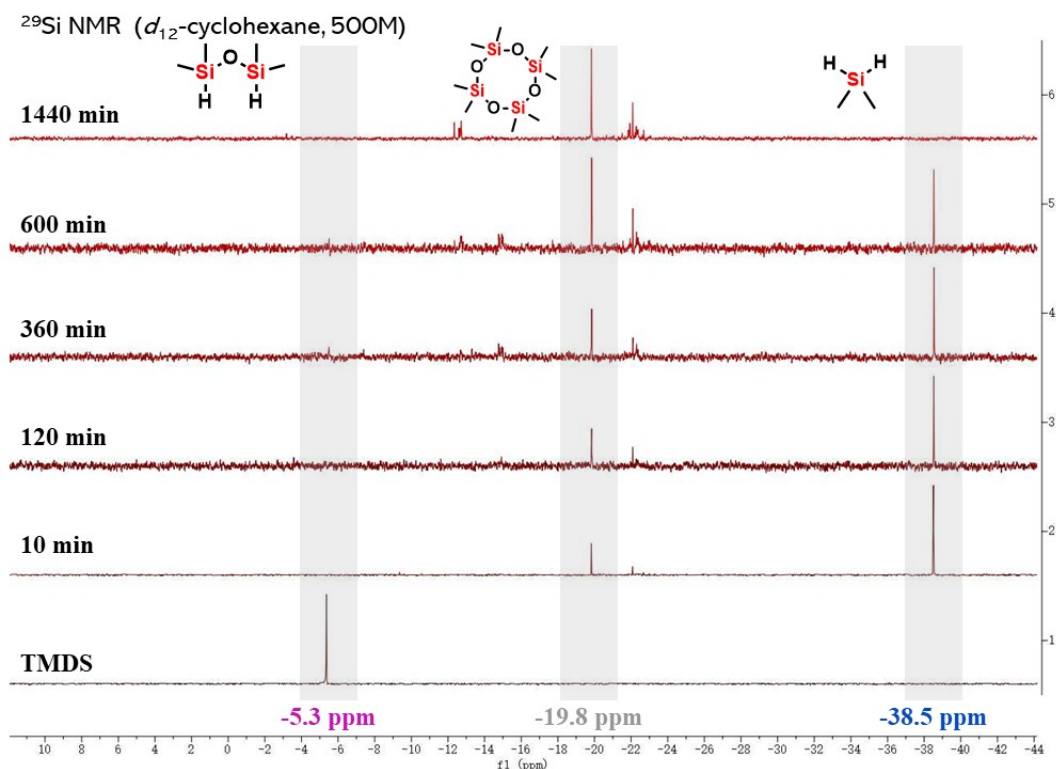

**Figure S5.**  $^{29}\text{Si}$  NMR experiments of hydrosilylation reduction of *N,N*-dimethylbenzamide

From the spectrum, TMDS was authentically disappeared (the peak at -5.3 ppm) rapidly in initial minutes and completely converted into mainly two parts (the peak at -19.8 ppm and -38.5 ppm), indicating that this activation process is actual a disproportionation of TMDS. From previous literatures, the peak at -19.8 ppm is refer to octamethylcyclotetrasiloxane<sup>[20]</sup> ( $\text{D}_4$ ) and the peak at -19.8 ppm is refer to dimethylsilane<sup>[20]</sup>. From the contrastive spectrum, we can discover that the amount of octamethylcyclotetrasiloxane do not decrease with the reaction but will increase evidently, while the amount of dimethylsilane decrease slowly, so we speculated that dimethylsilane is the actual reductant for the reduction.

Additionally, we also studied the effort of alkoxide and amides in this disproportionation process. The test procedure is following: A dry reaction tube containing a magnetic stir bar was charged with *N,N*-dimethylbenzamide (**1**) or  $t\text{BuOK}$ , and then  $d_{12}$ -cyclohexane (3.0 mL) was added into the tube *via* syringe. Then the tube was inserted into an oil bath preheated to  $35\text{ }^\circ\text{C}$  for 10 mins. Then TMDS was added quickly within 10 secs and the mixture kept stirring for 1 min. Then the NMR tests were carried out within 3 mins.

As shown in Figure S6, we found that amide play a crucial role in promoting the disproportionation, the disproportionation cannot occur in absent of alkoxide or amide (1.0 equiv). Specially, when no amide was added,  $\text{KO}^t\text{Bu}$  hardly caused any disproportionation or activation of TMDS, and even the stoichiometric amount did not work.

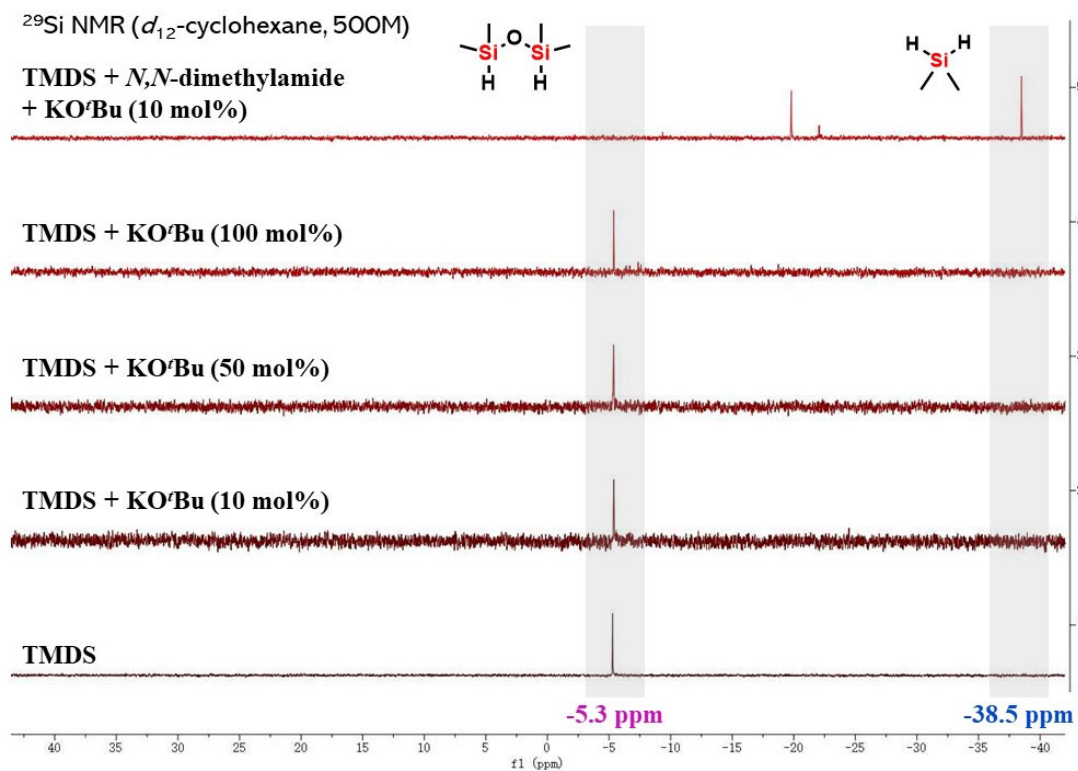

**Figure S6.** <sup>1</sup>H NMR experiments for the influence of KO<sup>t</sup>Bu in absent of amide

However, in the present of amides, the disproportionation occurred too rapidly to detect the behavior of the amides and alkoxide by NMR or ReactIR, as shown in Figure S7. Even very low loading of alkoxide (1.0 mol%) can make the disproportionation complete, further reducing the loading of alkoxide (< 0.5 mol%) made the disproportionation incomplete slightly (not listed). Another finding is that, with the increasing loading of alkoxide, the mode of disproportionation would be changed. Although the generation of Me<sub>2</sub>SiH<sub>2</sub> was always maintained, octamethylcyclotetrasiloxane would be no longer produced when the loading of alkoxide is more than 50 mol%, and hexamethylcyclotrisiloxane would be the main product. The reason for this change is unknown so far.



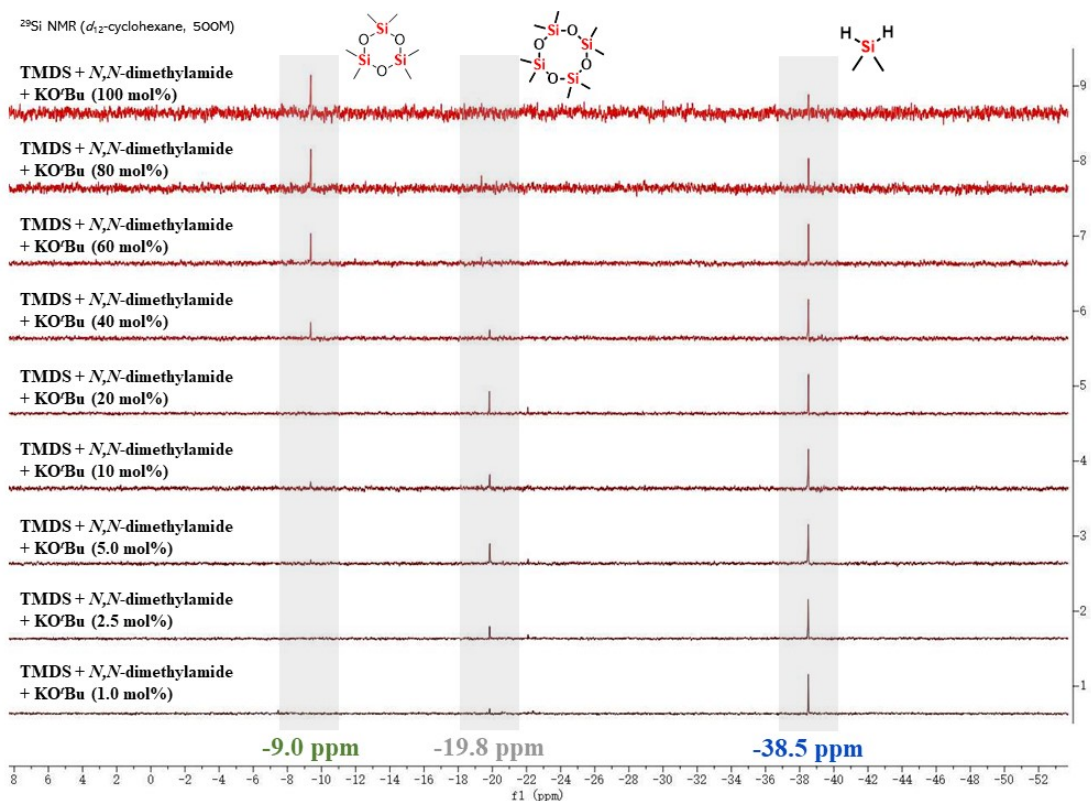

**Figure S7.** <sup>1</sup>H NMR experiments for the influence of KO<sup>t</sup>Bu in present of amide

We tried to detect the relationship of amide, alkoxide and silanes, however, all attempts were failed, no directed evidence can indicate the interaction among them, no visible difference was found in the displacement and shapes of characteristic peaks in NMR analysis and ReactIR. But we still have some findings to inspire our following research:

1) wide scope of amides can promote this kind of disproportionation of TMDS to produce Me<sub>2</sub>SiH<sub>2</sub> and cyclosiloxane, including DMF and DMA in cyclohexane as listed.

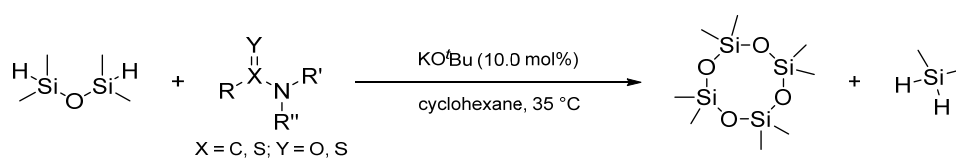

1.0 mmol

1.0 mmol

| Amide | Disproportionation of TMDS | Reduction of amide |
|-------|----------------------------|--------------------|
|       | ✓                          | ✓                  |
|       | ✓                          | ✗                  |

|                                                                                   |   |   |
|-----------------------------------------------------------------------------------|---|---|
| 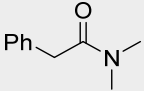 | ✓ | ✗ |
|  | ✗ | ✗ |
|  | ✗ | ✗ |
|  | ✓ | ✓ |
|  | ✗ | ✗ |
|  | ✗ | ✗ |

2) Silanes with similar structure to TMDS as listed, can undergo the same kind of disproportionation to produce corresponding secondary silane and cyclosiloxane, however, other common kinds of silane are failed to be converted in this system.

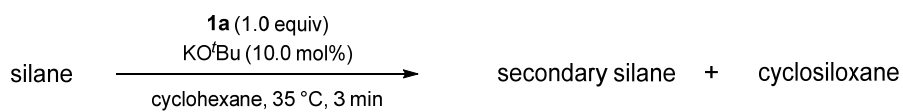

| Silane                                                                              | Products                         |                                    |
|-------------------------------------------------------------------------------------|----------------------------------|------------------------------------|
|                                                                                     | silane                           | cyclosiloxane                      |
| 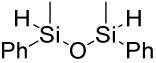 | PhMeSiH <sub>2</sub>             | (PhMeSiO) <sub>4</sub>             |
|  | Ph <sub>2</sub> SiH <sub>2</sub> | (Ph <sub>2</sub> SiO) <sub>4</sub> |
|  |                                  | Messy                              |
|  |                                  | Messy                              |
|  |                                  | No Reaction                        |
|  |                                  | No Reaction                        |
|  |                                  | Messy                              |
| (EtO) <sub>3</sub> SiH                                                              |                                  | No Reaction                        |

|                                  |             |
|----------------------------------|-------------|
| Et <sub>3</sub> SiH              | No Reaction |
| Et <sub>2</sub> SiH <sub>2</sub> | No Reaction |
| Ph <sub>2</sub> SiH <sub>2</sub> | No Reaction |
| PhSiH <sub>3</sub>               | No Reaction |

## 6.2 ReactIR Analysis

For the detailed evident of the generation of hemiaminal, we carried out the online ReactIR experiment in a 5.0 gram-scale reaction for 2 hours, the result was shown in Figure S8. As the reaction proceeded, the peak at 1655 cm<sup>-1</sup> gradually weakened and disappeared in 2 hours, at the same time the peak at 2517 cm<sup>-1</sup> is rapidly and maintained at a high intensity until the end of the test. By the comparison with prior reports<sup>[21]</sup>, the peak at 1655 cm<sup>-1</sup> is refer to the carbonyl in *N,N*-dimethylbenzamide, and the peak at 2517 cm<sup>-1</sup> is refer to the C-H bond in hemiaminal, there were no detectable characteristic peaks of imines and aldehydes. These phenomena exactly matched our expectations and NMR analysis.

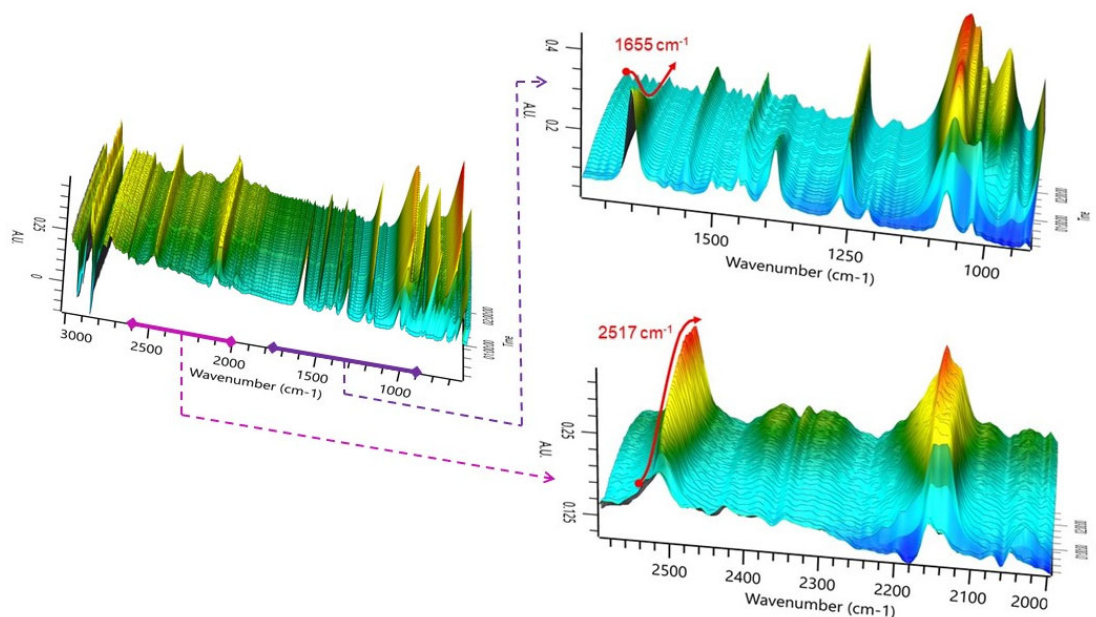

**Figure S8.** ReactIR study of hydrosilylation reduction of *N,N*-dimethylbenzamide

## 6.3 GC-MS Analysis

In the actual research process, in order to characterize the actual workable reductant, we mainly based on the results of GC-MS analysis. Firstly, we studied the light components in headspace gas, by comparison with the standard mixed gas, hydrogen and nitrogen can be detected. The nitrogen inevitably exists as inert protective gas, while the hydrogen maybe generated from the activation process of silane. However, the amount of hydrogen is very lower than amides (< 0.01 mmol), thus hydrogen are not the effective reductant.

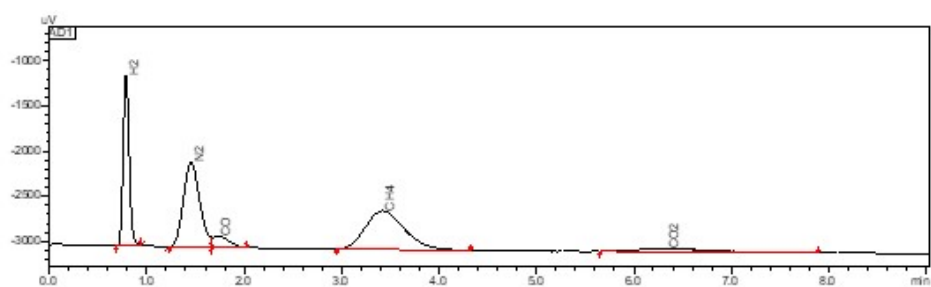

Mixed Standard Gas — 0.1 mL

| Entry | Name            | R. Time | Area  | Height | Conc. % |
|-------|-----------------|---------|-------|--------|---------|
| 1     | H <sub>2</sub>  | 0.787   | 8083  | 1879   | 0.100   |
| 2     | N <sub>2</sub>  | 1.456   | 10986 | 935    | 0.100   |
| 3     | CO              | 1.741   | 1336  | 115    | 0.100   |
| 4     | CH <sub>4</sub> | 3.421   | 11880 | 427    | 0.100   |
| 5     | CO <sub>2</sub> | 6.328   | 1634  | 30     | 0.100   |

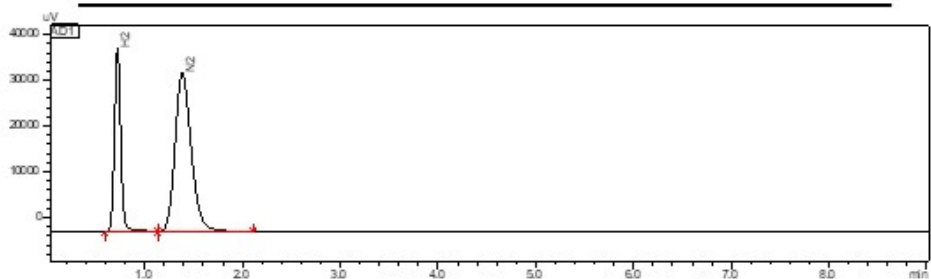

Reaction Top Gas — 1.0 mL

| Entry | Name            | R. Time | Area   | Height | Conc. % |
|-------|-----------------|---------|--------|--------|---------|
| 1     | H <sub>2</sub>  | 0.722   | 184740 | 40073  | 2.286   |
| 2     | N <sub>2</sub>  | 1.383   | 402005 | 34687  | 3.659   |
| 3     | CO              | 1.741   | 0      | 0      | 0.000   |
| 4     | CH <sub>4</sub> | 3.421   | 0      | 0      | 0.000   |
| 5     | CO <sub>2</sub> | 6.328   | 0      | 0      | 0.000   |

**Figure S9.** GC-MS analysis of hydrosilylation reduction of *N,N*-dimethylbenzamide (light components in headspace gas)

Then we analyzed the heavy components in headspace gas, two substances were detected. One is the cyclohexane, which is the solvent, and the another is the Me<sub>2</sub>SiH<sub>2</sub>, which is the actual workable reductant. Although dimethylsilane usually exists in gaseous form, it has sufficient solubility in organic solvents to participate in the reduction reaction, which is consist with NMR data. And because of this property, it can also maintain a relatively stable and low concentration in the system, so as to effectively realize the chemoselectivity control of reduction reaction.

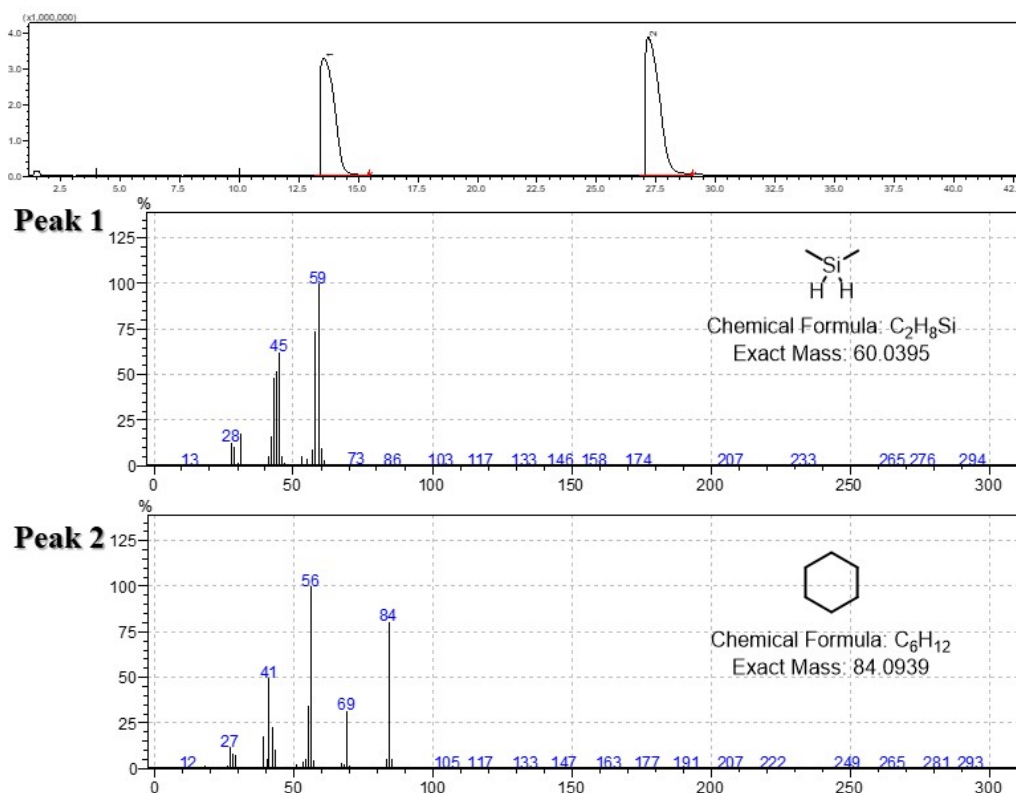

**Figure S10.** GC-MS analysis of hydrosilylation reduction of *N,N*-dimethylbenzamide (heavy components in headspace gas)

## 6.4 Control Experiments

Because it is difficult to obtain gaseous dimethylsilane, we carried out comparative experiments with other analogues, showing the special reduction ability of dimethylsilane, including: a) when commercially available diethylsilane was used as reductant, the reduction efficiency will be greatly reduced, indicating that the reducing ability of dimethylsilane is more efficient than diethylsilane; b) when 1,1,2,2-tetramethyldisilane (**6a**), which has quite similar properties to dimethylsilane, was used as reductant, **6a** also exhibited the very similar reduction efficiency to dimethylsilane under standard conditions, indicating that dimethylsilane is indeed the effective reductant for this system. However, the reduction would not occur in absent of KO<sup>t</sup>Bu, showing that the dimethylsilane must be activated by alkoxide to reduce amides; c) although we believe that hydrogen cannot be used as H-donor in this system, we have conducted validation test. It turns out that hydrogen is completely inactive for this reaction.

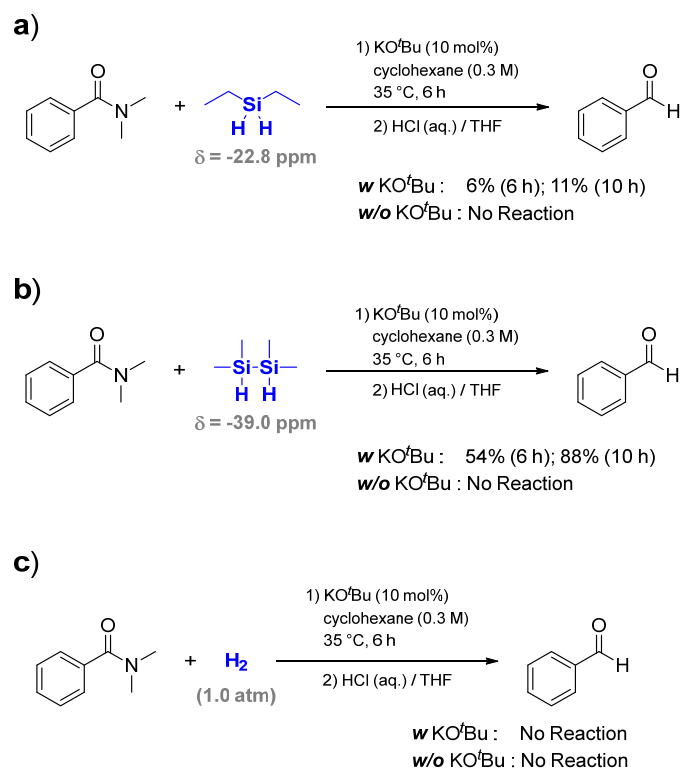

**Figure S11.** Control experiments

## 6.5 Kinetic Experiments

To understanding the rate determination step of our reaction, we conduct the kinetic experiments. A 25 mL three-neck round-bottom flask containing a magnetic stir bar, which was dried under vacuum, was charged with **1a** (X mmol) and *t*-BuOK (Z mmol). Dry cyclohexane (10.0 mL) was then added into the tube *via* syringe. An IR detector was fixed at one of three necks and the probe should be placed below the solvent surface. Then the flask was put into oil-bath at 35 °C. Meanwhile, IR data was allowed to be collected. TMDS (Y mmol) was added dropwise into the flask *via* syringe in 5-10 seconds. The mixture was further stirred at 35 °C for one hour. Then stop IR data acquisition and remove the detector from the flask. Repeat the above operations for different concentrations of each component. The data was listed in Table S11. It should be noted that we use the average rate of consumption of amide (1650 cm<sup>-1</sup>) in the first 15 minutes to refer to the initial rate of the reaction.

Through analysis and calculation, the reaction order is first order with respect to [TMDS] and [*t*-BuOK], nearly zero order with respect to [amide], meaning that silane and base are involved in RDS as reactants and amide is not transformed in RDS. Combined above data, we conjecture that the activation of silane to generate the pentavalent silicate is most likely to be the RDS.

**Table S11 Summary of Dynamic Data**

| Entry | Amide (mmol) | TMDS (mmol) | <i>t</i> -BuOK (mmol) | $k_0$ (M/s) |
|-------|--------------|-------------|-----------------------|-------------|
| 1     | 1.0          |             |                       | -0.5570     |
| 2     | 2.0          |             |                       | -0.4941     |
| 3     | 4.0          | 4.0         | 0.2                   | -0.5869     |
| 4     | 8.0          |             |                       | -0.5968     |

|    |     |      |     |         |
|----|-----|------|-----|---------|
| 5  |     | 2.0  |     | -0.3945 |
| 6  | 2.0 | 4.0  | 0.2 | -0.4941 |
| 7  |     | 8.0  |     | -0.8012 |
| 8  |     | 16.0 |     | -1.1448 |
| 9  |     |      | 0.1 | -0.1009 |
| 10 | 2.0 | 4.0  | 0.2 | -0.4941 |
| 11 |     |      | 0.4 | -1.7458 |
| 12 |     |      | 0.8 | -4.1247 |

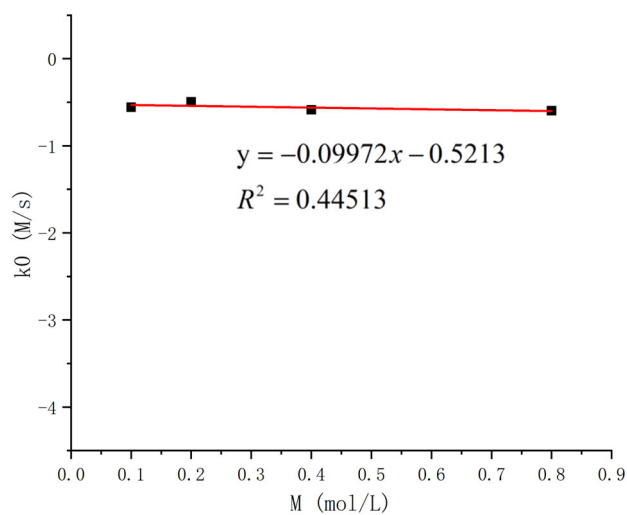

**Figure S12.** Determination of the Reaction Order in [amide (1a)]

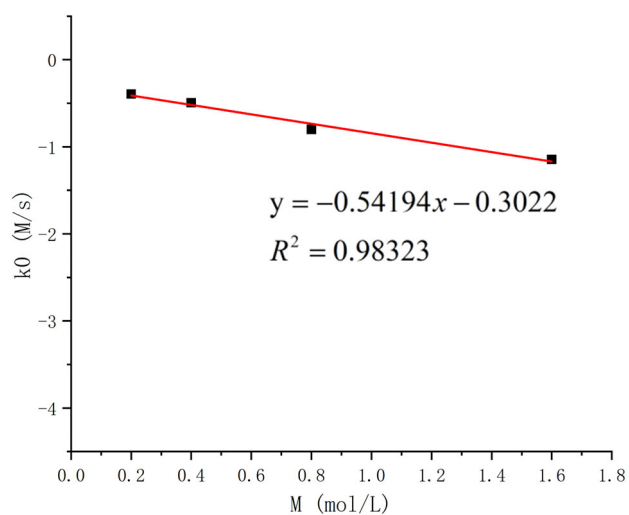

**Figure S13.** Determination of the Reaction Order in [TMDS]

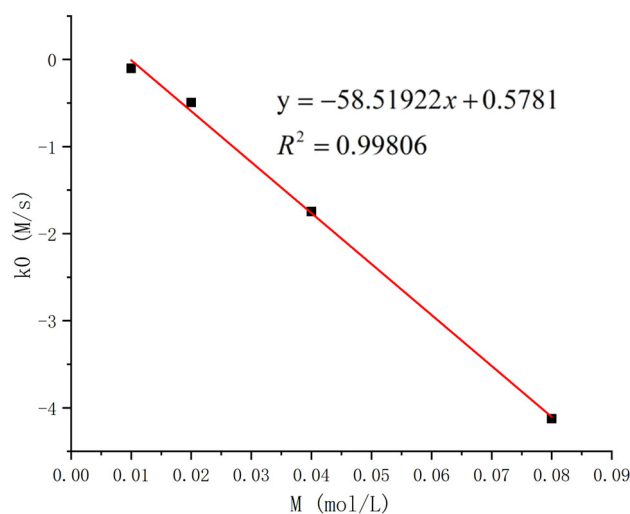

**Figure S14.** Determination of the Reaction Order in [*t*-BuOK]

## 7. Synthetic Application Research

### 7.1 Gram-scale Reaction

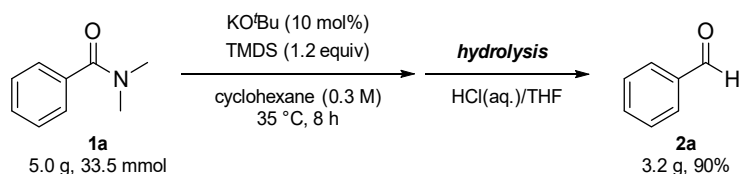

A dry reaction tube containing a magnetic stir bar was charged with amide *N,N*-dimethylbenzamide (**1a**, 5.0 g, 33.5 mmol, 1.0 equiv) and <sup>t</sup>BuOK (376 mg, 3.35 mmol, 0.1 equiv), cyclohexane (100.0 mL) was then added into the tube *via* syringe. Then the tube was sealed with a rubber stopper and inserted into an oil bath preheated to 35 °C. TMDS (5.4 g, 40.0 mmol, 1.2 equiv) was added dropwise into the tube slowly within 15 min. The mixture was stirred for 8 h, removed from the oil bath, and allowed to cool to the room temperature. HCl (aq.)/THF solution (30.0 mL) was added to quench the reaction for 10 min. The mixture was extracted with EtOAc (20.0 mL × 3), the combined organic phase was washed by brine and dried over Na<sub>2</sub>SO<sub>4</sub>. After removing the solvent under vacuum carefully, **2a** was obtained from the residue by distillation (177-178 °C) in 90% yield as colorless liquid.

### 7.2 Chemoselective Reduction of Diamides

A dry reaction tube containing a magnetic stir bar was charged with diamide (**1**, 1.0 mmol, 1.0 equiv) and <sup>t</sup>BuOK (11.2 mg, 0.1 mmol, 0.1 equiv), cyclohexane or THF (3.0 mL) was then added into the tube *via* syringe. TMDS (402 mg, 3.0 mmol, 3.0 equiv) was added dropwise into the tube slowly. Then the tube was sealed with a rubber stopper and inserted into an oil bath preheated to 35 °C. The mixture was stirred for 6 h, removed from the oil bath, and allowed to cool to the room temperature. HCl (aq.)/THF solution (2.0 mL) was added to quench the reaction for 10 min. The mixture was extracted with EtOAc



(3.0 mL × 3), the combined organic phase was washed by brine and dried over Na<sub>2</sub>SO<sub>4</sub>. After removing the solvent under vacuum, the residue was purified by column chromatography (silica gel) to give **2**.

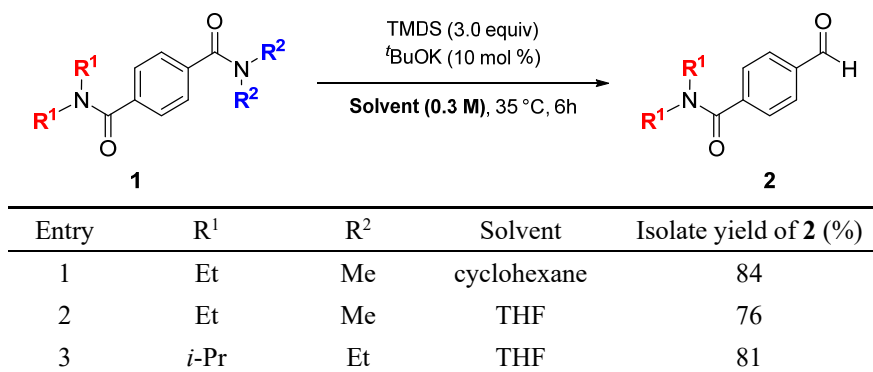

## 7.3 Tandem Deoxygenative Functionalization

### 7.3.1 Alkylation

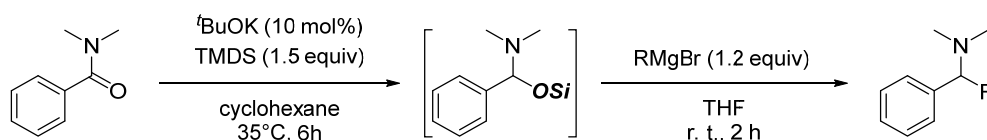

A dry reaction tube containing a magnetic stir bar was charged with *N,N*-dimethylbenzamide (**1a**, 149 g, 1.0 mmol, 1.0 equiv) and <sup>t</sup>BuOK (11.2 mg, 0.1 mmol, 0.1 equiv), cyclohexane (3.0 mL) was then added into the tube *via* syringe. TMDS (201 mg, 1.5 mmol, 1.5 equiv) was added dropwise into the tube slowly. Then the tube was sealed with a rubber stopper and inserted into an oil bath preheated to 35 °C. The mixture was stirred for 6 h, removed from the oil bath, and allowed to cool to room temperature. Then Grignard reagent (1.0 M in THF, 1.2 equiv) was added dropwise into the tube slowly *via* syringe. The mixture was stirred for 2 h at room temperature. Then EtOH (3.0 mL) was added to quench the reaction for 10 min. The mixture was extracted with EtOAc (3.0 mL × 3), the combined organic phase was extracted with *conc.* HCl (5.0 mL × 2). Then the water phase was adjusted to neutral with 15% KOH solution and extracted with DCM (5.0 mL × 3). The combined organic phase washed by brine and dried over Na<sub>2</sub>SO<sub>4</sub>. The product was afforded after removing the solvent under vacuum.

*Specially:* If the product was not pure, it can be purified by column chromatography (silica gel).

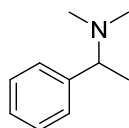

*N,N*-dimethyl-1-phenylethan-1-amine (**5a**)<sup>[22]</sup>: colorless liquid: 125 mg, 84% yield.

**Purification:** flash column chromatography (300-400 mesh silica gel, PE : EA : MeOH = 1 : 1 : 0.01).

**<sup>1</sup>H NMR (500 MHz, CDCl<sub>3</sub>):** δ 7.33 – 7.28 (m, 4H), 7.25 – 7.22 (m, 1H), 3.24 (q, *J* = 6.5 Hz, 1H), 2.20 (s, 6H), 1.37 (d, *J* = 6.5 Hz, 3H).

**<sup>13</sup>C NMR (125 MHz, CDCl<sub>3</sub>):** δ 144.3, 128.3, 127.7, 127.0, 66.1, 43.4, 20.4.

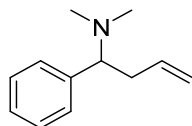

*N,N*-Dimethyl-1-phenylbut-3-en-1-amine (**5b**)<sup>[23]</sup>: colorless liquid: 159 mg, 91% yield.

**Purification:** flash column chromatography (300-400 mesh silica gel, PE : EA= 1 : 2).

**<sup>1</sup>H NMR (500 MHz, CDCl<sub>3</sub>):** δ 7.32 – 7.28 (m, 2H), 7.25 – 7.21 (m, 3H), 5.66 – 5.56 (m, 1H), 5.00 – 4.90 (m, 2H), 3.28 – 3.24 (m, 1H), 2.68 – 2.62 (m, 1H), 2.56 – 2.48 (m, 1H), 2.19 (s, 6H).

**<sup>13</sup>C NMR (125 MHz, CDCl<sub>3</sub>):** δ 140.2, 135.8, 128.7, 128.1, 127.2, 116.5, 70.7, 42.8, 37.9.

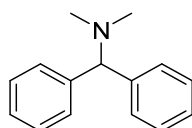

*N,N*-Dimethyl-1,1-diphenylmethanamine (**5c**)<sup>[24]</sup>: white solid: 185 mg, 88% yield, mp 61 – 63 °C.

**Purification:** flash column chromatography (300-400 mesh silica gel, PE : EA= 1 : 2).

**<sup>1</sup>H NMR (500 MHz, CDCl<sub>3</sub>):** δ 7.44 (d, *J* = 8.0 Hz, 4H), 7.27 (m, 4H), 7.17 (t, *J* = 7.0 Hz, 2H), 4.07 (s, 1H), 2.20 (s, 6H).

**<sup>13</sup>C NMR (125 MHz, CDCl<sub>3</sub>):** δ 143.6, 128.6, 127.9, 127.0, 78.2, 44.9.

### 7.3.2 Alkynylation

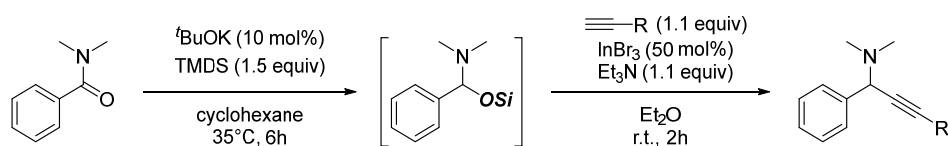

A dry reaction tube containing a magnetic stir bar was charged with *N,N*-dimethylbenzamide (**1a**, 149 mg, 1.0 mmol, 1.0 equiv) and <sup>t</sup>BuOK (11.2 mg, 0.1 mmol, 0.1 equiv), cyclohexane (3.0 mL) was then added into the tube *via* syringe. TMDS (201 mg, 1.5 mmol, 1.5 equiv) was added dropwise into the tube slowly. Then the tube was sealed with a rubber stopper and inserted into an oil bath preheated to 35 °C. The mixture was stirred for 6 h, removed from the oil bath, and allowed to cool to room temperature. Then the mixture was transferred into another reaction tube containing a magnetic stir bar which was charged with alkyne (1.1 equiv), InBr<sub>3</sub> (177 mg, 50 mol%, 0.2 equiv), Et<sub>3</sub>N (112 mg, 1.1 mmol, 1.1 equiv) and Et<sub>2</sub>O (4.0 mL). The mixture was stirred for 2 h at room temperature then was extracted with EtOAc (3.0 mL × 3). The combined organic phase was extracted with *conc.* HCl (5.0 mL × 2). Then the water phase was adjusted to neutral with 15% KOH solution and extracted with DCM (5.0 mL × 3). The combined organic phase washed by brine and dried over Na<sub>2</sub>SO<sub>4</sub>. The product was afforded after removing the solvent under vacuum.

*Specially:* If the product was not pure, it can be purified by column chromatography (silica gel).

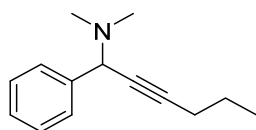

***N,N*-Dimethyl-1-phenylhex-2-yn-1-amine (6a)**: yellow liquid: 148 mg, 74% yield.

**Purification**: flash column chromatography (300-400 mesh silica gel, PE : EA= 1 : 2).

**<sup>1</sup>H NMR (500 MHz, CDCl<sub>3</sub>)**: δ 7.55 – 7.53 (m, 2H), 7.35 – 7.32 (m, 2H), 7.28 – 7.26 (m, 1H), 4.57 (s, 1H), 2.33 – 2.30 (m, 2H), 2.23 (s, 6H), 1.65 – 1.60 (m, 2H), 1.07 – 1.04 (m, 3H).

**<sup>13</sup>C NMR (125 MHz, CDCl<sub>3</sub>)**: δ 139.4, 128.6, 128.2, 127.5, 88.5, 75.1, 61.9, 41.6, 22.7, 20.9, 13.7.

**IR (KBr) ν(cm<sup>-1</sup>)**: 3476, 2929, 1632, 1394, 1265, 1216, 1085, 735, 636.

**HRMS – ESI (m/z)**: [M + H]<sup>+</sup> called for C<sub>14</sub>H<sub>20</sub>N, 202.1596, found 202.1598.

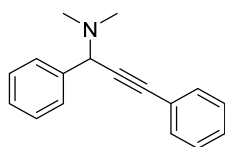

***N,N*-Dimethyl-1,3-diphenylprop-2-yn-1-amine (6b)**<sup>[25]</sup>: yellow liquid: 227 mg, 97% yield.

**Purification**: flash column chromatography (300-400 mesh silica gel, PE : EA= 1 : 1).

**<sup>1</sup>H NMR (500 MHz, CDCl<sub>3</sub>)**: δ 7.64 (d, *J* = 7.5 Hz, 2H), 7.56 – 7.54 (m, 2H), 7.41 – 7.31 (m, 6H), 4.86 (s, 1H), 2.35 (s, 6H).

**<sup>13</sup>C NMR (125 MHz, CDCl<sub>3</sub>)**: δ 138.7, 131.9, 128.6, 128.4, 128.32, 128.28, 128.0, 123.3, 88.5, 84.9, 62.3, 41.7.

### 7.3.3 Cyanation

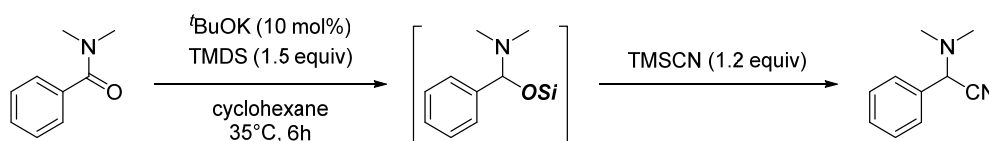

A dry reaction tube containing a magnetic stir bar was charged with *N,N*-dimethylbenzamide (**1a**, 149 mg, 1.0 mmol, 1.0 equiv) and <sup>t</sup>BuOK (11.2 mg, 0.1 mmol, 0.1 equiv), cyclohexane (3.0 mL) was then added into the tube *via* syringe. TMSD (201 mg, 1.5 mmol, 1.5 equiv) was added dropwise into the tube slowly. Then the tube was sealed with a rubber stopper and inserted into an oil bath preheated to 35 °C. The mixture was stirred for 6 h. Then TMSCN (119 mg, 1.2 mmol, 1.2 equiv) was added into the tube *via* syringe, and the mixture continued being stirred for another 2 h. Until the reaction completed, the mixture was removed from oil bath and cooled to room temperature. Then the solvent was evaporated and the desired product was obtained by column chromatography (silica gel).

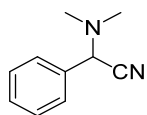

**2-(Dimethylamino)-2-phenylacetone nitrile (7a)**<sup>[26]</sup>: colorless oil: 125 mg, 78% yield.

**Purification**: flash column chromatography (300-400 mesh silica gel, PE : EA= 10 : 1).

**<sup>1</sup>H NMR (400 MHz, CDCl<sub>3</sub>)**: δ 7.53 – 7.50 (m, 2H), 7.43 – 7.35 (m, 3H), 4.85 (s, 1H), 2.33 (s, 6H).

**<sup>13</sup>C NMR (100 MHz, CDCl<sub>3</sub>)**: δ 133.6, 128.8, 128.7, 127.7, 115.0, 63.0, 41.7.

## 7.4 Preparation of Pharmaceutical Intermediates

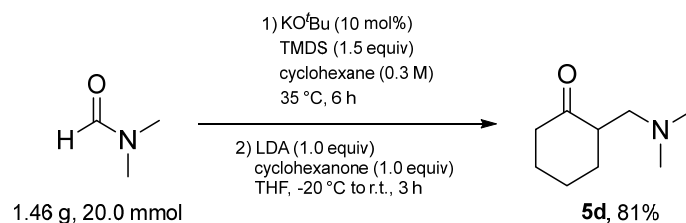

**Reaction bottle A:** a dry round-bottom flask containing a magnetic stir bar was charged with DMF (20.0 mmol, 1.0 equiv, 1.46 g), and <sup>t</sup>BuOK (2.0 mmol, 0.1 equiv), cyclohexane (60.0 mL) was then added into the tube *via* syringe. TMSD (30.0 mmol, 1.5 equiv) was added dropwise into the tube slowly within 15 min. Then the tube was sealed with a rubber stopper and inserted into an oil bath preheated to 35 °C. The mixture was stirred for 6 h, removed from the oil bath, and allowed to cool to room temperature.

**Reaction bottle B:** a dry round-bottom flask containing a magnetic stir bar was charged with cyclohexanone (20.0 mmol, 1.0 equiv), and THF (30.0 mL), then cooled to -20 °C. LDA (20.0 mmol, 1.0 equiv, 1.0 M in THF) was then added into the flask *via* funnel. Until the addition of LDA was completed, the reaction maintained at -20 °C, then slowly raise to room temperature for 1 h.

When both reactions have been ready, the mixture in **bottle A** was carefully transferred into funnel *via* syringe and funnel, and then slowly added into **bottle B** at 0 °C. Until the addition finished, the reaction continued at room temperature for 3 h. Then the saturated NH<sub>4</sub>Cl (aq., 10.0 mL) was added to quench the reaction, and the saturated Na<sub>2</sub>CO<sub>3</sub> (aq., 20 mL) was added to ensure the pH > 7.0. Then the mixture was transferred into separating funnel and extracted with EtOAc (30.0 mL × 3). The combined organic phase washed by brine and dried over Na<sub>2</sub>SO<sub>4</sub>. After removing the solvent under vacuum carefully, the **5d** was obtained from the residue by distillation as colorless oil.

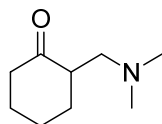

**2-((Dimethylamino)methyl)cyclohexan-1-one (5d)**<sup>[27]</sup>: colorless oil: 2.51 g, 81% yield.

**Purification:** Distillation (87 – 89 °C, 10 mmHg).

**<sup>1</sup>H NMR (400 MHz, CDCl<sub>3</sub>):** δ 2.69 – 2.64 (m, 1H), 2.51 – 2.43 (m, 1H), 2.41 – 2.36 (m, 1H), 2.33 – 2.25 (m, 1H), 2.21 – 2.16 (m, 8H), 2.05 – 1.95 (m, 1H), 1.87 – 1.81 (m, 1H), 1.74 – 1.59 (m, 2H), 1.43 – 1.33 (m, 1H).

**<sup>13</sup>C NMR (125 MHz, CDCl<sub>3</sub>):** δ 212.8, 59.1, 49.1, 45.9, 42.1, 32.6, 28.1, 24.7.

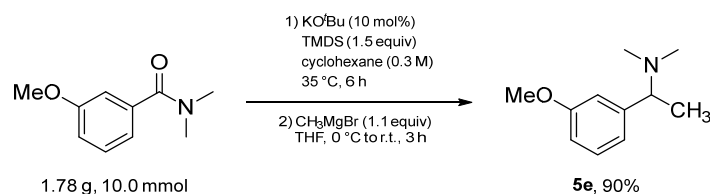

A dry round-bottom flask containing a magnetic stir bar was charged with **1g** (10.0 mmol, 1.0 equiv, 1.78 g), and <sup>t</sup>BuOK (1.0 mmol, 0.1 equiv), cyclohexane (30.0 mL) was then added into the tube *via* syringe. TMSD (15.0 mmol, 1.5 equiv) was added dropwise into the tube slowly within 15 min. Then the tube

was sealed with a rubber stopper and inserted into an oil bath preheated to 35 °C. The mixture was stirred for 6 h, removed from the oil bath, and allowed to cool to 0 °C in an ice bath. Then Grignard reagent (1.0 M in THF, 1.1 equiv) was added dropwise into the tube slowly *via* syringe. The mixture was stirred for 2 h and gradually returned to room temperature. Then EtOH (5.0 mL) was added to quench the reaction for 10 min. Then the mixture was transferred into separating funnel and extracted with EtOAc (10.0 mL × 3). The combined organic phase washed by brine and dried over Na<sub>2</sub>SO<sub>4</sub>. After removing the solvent under vacuum carefully, the **5e** was obtained from the residue by distillation as pale-yellow oil.

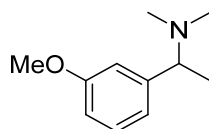

**1-(3-Methoxyphenyl)-N,N-dimethylethan-1-amine (5e)**<sup>[28]</sup>: pale yellow oil: 1.61 g, 90% yield.

**Purification:** Distillation (101 – 103 °C, 10 mmHg).

**<sup>1</sup>H NMR (400 MHz, CDCl<sub>3</sub>):** δ 7.24 – 7.20 (m, 1H), 6.87 – 6.86 (m, 2H), 6.80 – 6.77 (m, 1H), 3.81 (s, 3H), 3.21 (q, *J* = 6.8 Hz, 1H), 2.19 (s, 6H), 1.36 (d, *J* = 6.8 Hz, 3H).

**<sup>13</sup>C NMR (100 MHz, CDCl<sub>3</sub>):** δ 159.7, 145.9, 129.3, 120.2, 113.2, 112.4, 66.2, 55.3, 43.4, 20.5.

## 8. Synthesis and Characterization of Reactants

### 8.1 General Synthesis Procedure for Amides

**1h**, **1pp**, **1qq**, **1tt**, **1uu**, **1xx** and almost silanes are commercially available compounds. Methods for the preparation of the remaining amides and 1,1,2,2-tetramethyldisilane (**6a**) are described below. Their characterization data are also listed.

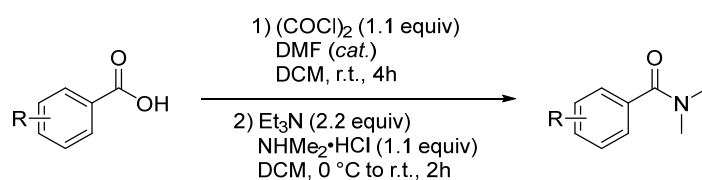

**Method A:** A dry flask containing a magnetic stir bar was charged with carboxylic acid (10.0 mmol, 1.0 equiv), DMF (0.1 mL) and DCM (40 mL). (COCl)<sub>2</sub> (1.5 g, 12.0 mmol, 1.2 equiv) was added dropwise into the flask slowly at room temperature. The mixture was stirred for 4 h after no more bubbles were generated. The solvent and excess oxalyl chloride were removed under reduced pressure to give the acid chloride product. The amine hydrochloride (15.0 mmol, 1.5 equiv) and DCM (40 mL) were added to the flask containing the acid chloride and a magnetic stir bar. Et<sub>3</sub>N (25.0 mmol, 2.5 equiv) in DCM (15 mL) solution was added dropwise into the flask *via* funnel at 0 °C. The mixture was stirred for 2 h and gradually returned to room temperature. The mixture was washed by brine and dried over Na<sub>2</sub>SO<sub>4</sub>. After removing the solvent under vacuum, the residue was purified by column chromatography (silica gel) to give the product.

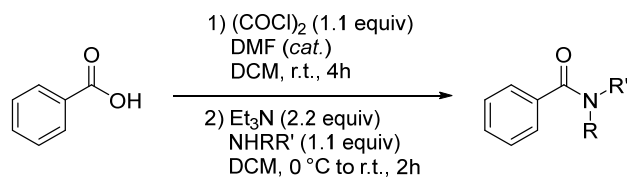

**Method B:** A dry flask containing a magnetic stir bar was charged with carboxylic acid (10.0 mmol, 1.0 equiv), DMF (0.1 mL) and DCM (40 mL).  $(\text{COCl})_2$  (1.5 g, 12.0 mmol, 1.2 equiv) was added dropwise into the flask slowly at room temperature. The mixture was stirred for 4 h after no more bubbles were generated. The solvent and excess oxalyl chloride were removed under reduced pressure to give the acid chloride product. The DCM (40 mL) was added to the flask containing the acid chloride and a magnetic stir bar.  $\text{Et}_3\text{N}$  (25.0 mmol, 2.5 equiv) and amine (15.0 mmol, 1.5 equiv) in DCM (15 mL) solution was added dropwise into the flask *via* funnel at 0 °C. The mixture was stirred for 2 h and gradually returned to room temperature. The mixture was washed by brine and dried over  $\text{Na}_2\text{SO}_4$ . After removing the solvent under vacuum, the residue was purified by column chromatography (silica gel) to give the product.

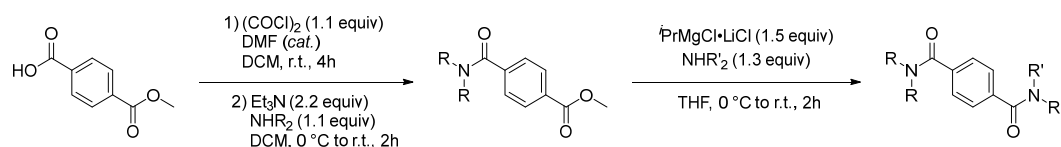

**Method C:** The methyl ester amides were prepared by **method A**. A dry flask containing a magnetic stir bar was charged with  ${}^i\text{PrMgCl}\cdot\text{LiCl}$  (1.0 M in THF, 7.5 mmol, 1.5 equiv). Amine (6.5 mmol, 1.3 equiv) was added dropwise into the flask slowly at 0 °C. The mixture was stirred for 1h. Methyl ester amide (5.0 mmol, 1.0 equiv) was dissolved in anhydrous THF and slowly added to the flask. The mixture was stirred for 2 h at 0 °C. Then  $\text{EtOH}$  (3.0 mL) and  $\text{H}_2\text{O}$  (5.0 mL) was added to quench the reaction for 10 min. The mixture was filtered to remove solids or insolubles. The liquid was extracted with DCM (5.0 mL  $\times$  3). The combined organic phase washed by brine and dried over  $\text{Na}_2\text{SO}_4$ . After removing the solvent under vacuum, the residue was purified by column chromatography (silica gel) to give the product.

## 8.2 Characterization of amides

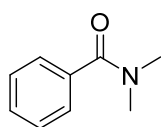

***N,N*-Dimethylbenzamide (1a)**<sup>[1]</sup>: prepared by method A, white solid: 1.13 g, 75% yield, mp 43 – 45 °C.

**Purification:** flash column chromatography (300-400 mesh silica gel, PE : EA = 2 : 1).

**${}^1\text{H NMR}$  (500 MHz,  $\text{CDCl}_3$ ):**  $\delta$  7.39 – 7.35 (m, 5H), 3.08 (s, 3H), 2.94 (s, 3H).

**${}^{13}\text{C NMR}$  (125 MHz,  $\text{CDCl}_3$ ):**  $\delta$  171.2, 136.4, 129.5, 128.4, 127.1, 39.6, 35.3.

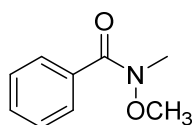

***N*-Methoxy-*N*-methylbenzamide (1ff)**<sup>[1]</sup>: prepared by method B, light yellow liquid: 1.29 g, 78% yield.

**Purification:** flash column chromatography (300-400 mesh silica gel, PE : EA = 2 : 1).

**<sup>1</sup>H NMR (500 MHz, CDCl<sub>3</sub>):** δ 7.61 – 7.60 (m, 2H), 7.40 – 7.31 (m, 3H), 3.48 (s, 3H), 3.28 (s, 3H).

**<sup>13</sup>C NMR (125 MHz, CDCl<sub>3</sub>):** δ 169.8, 134.1, 130.4, 128.0, 127.92, 127.89, 60.9, 33.6.

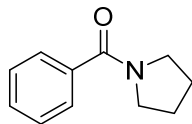

**Phenyl(pyrrolidin-1-yl)methanone (1gg)**<sup>[29]</sup>: prepared by method B, colorless oil: 1.51 g, 86% yield.

**Purification:** flash column chromatography (300-400 mesh silica gel, PE : EA = 1 : 1).

**<sup>1</sup>H NMR (400 MHz, CDCl<sub>3</sub>):** δ 7.54 – 7.48 (m, 2H), 7.42 – 7.36 (m, 3H), 3.63 – 3.48 (br, 4H), 1.91 (s, 4H).

**<sup>13</sup>C NMR (100 MHz, CDCl<sub>3</sub>):** δ 169.8, 137.4, 129.8, 128.3, 127.2, 49.7, 46.3, 26.5, 24.6.

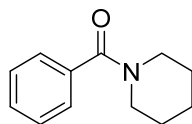

**Phenyl(piperidin-1-yl)methanone (1hh)**<sup>[30]</sup>: prepared by method B, light yellow liquid: 1.47 g, 78% yield.

**Purification:** flash column chromatography (300-400 mesh silica gel, PE : EA = 2 : 1).

**<sup>1</sup>H NMR (500 MHz, CDCl<sub>3</sub>):** δ 7.36 – 7.35 (m, 5H), 3.68 (s, 2H), 3.30 (s, 2H), 1.63 (s, 4H), 1.47 (s, 2H).

**<sup>13</sup>C NMR (125 MHz, CDCl<sub>3</sub>):** δ 170.2, 136.4, 129.2, 128.3, 126.7, 48.6, 43.0, 26.4, 25.5, 24.5.

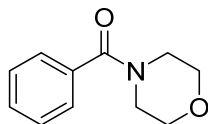

**Morpholino(phenyl)methanone (1ii)**<sup>[29]</sup>: prepared by method B, colorless oil: 1.49 g, 79% yield.

**Purification:** flash column chromatography (300-400 mesh silica gel, PE : EA = 2 : 1).

**<sup>1</sup>H NMR (400 MHz, CDCl<sub>3</sub>):** δ 7.44 – 7.38 (m, 5H), 3.83 – 3.42 (m, 8H).

**<sup>13</sup>C NMR (100 MHz, CDCl<sub>3</sub>):** δ 170.6, 135.5, 130.0, 128.7, 127.2, 67.0, 48.0, 42.8.

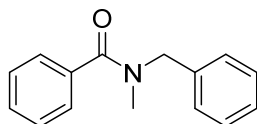

**N-Benzyl-N-methylbenzamide (1jj)**<sup>[29]</sup>: prepared by method B, colorless oil: 1.73 g, 77% yield.

**Purification:** flash column chromatography (300-400 mesh silica gel, PE : EA = 2 : 1).

**<sup>1</sup>H NMR (400 MHz, CDCl<sub>3</sub>):** δ 7.47 – 7.31 (m, 9H), 7.18 (s, 1H), 4.77 – 4.51 (br, 2H), 3.03 – 2.87 (br, 2H).

**<sup>13</sup>C NMR (100 MHz, CDCl<sub>3</sub>):** δ 172.3, 171.7, 137.2, 136.7, 136.4, 129.7, 128.9, 128.6, 128.3, 127.7, 127.1, 126.9, 55.3, 50.9, 37.6, 32.3.

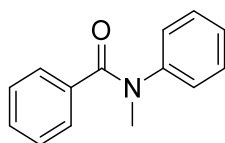

**N-Methyl-N-phenylbenzamide (1kk)**<sup>[31]</sup>: prepared by method B, pale orange oil: 1.69 g, 80% yield.

**Purification:** flash column chromatography (300-400 mesh silica gel, PE : EA = 4 : 1).

**<sup>1</sup>H NMR (400 MHz, CDCl<sub>3</sub>):** δ 7.31 – 7.28 (m, 2H), 7.25 – 7.20 (m, 3H), 7.17 – 7.13 (m, 3H), 7.05 – 7.02 (m, 2H), 3.50 (s, 3H).

**<sup>13</sup>C NMR (100 MHz, CDCl<sub>3</sub>):** δ 170.8, 145.0, 136.0, 129.7, 129.2, 128.8, 127.8, 127.0, 126.6, 39.5.

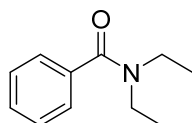

**N,N-Diethylbenzamide (1ll)**<sup>[1]</sup>: prepared by method B, light yellow liquid: 1.45 g, 82% yield.

**Purification:** flash column chromatography (300-400 mesh silica gel, PE : EA = 2 : 1).

**<sup>1</sup>H NMR (400 MHz, CDCl<sub>3</sub>):** δ 7.36 – 7.32 (m, 5H), 3.50 (s, 2H), 3.22 (s, 2H), 1.21 (s, 3H), 1.07 (s, 3H).

**<sup>13</sup>C NMR (100 MHz, CDCl<sub>3</sub>):** δ 171.3, 137.3, 129.1, 128.4, 126.3, 43.3, 39.2, 14.2, 12.9.

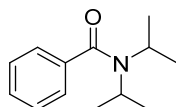

**N,N-Diisopropylbenzamide (1mm)**<sup>[1]</sup>: prepared by method B, white solid: 1.38 g, 67% yield, mp 61 – 63 °C.

**Purification:** flash column chromatography (300-400 mesh silica gel, PE : EA = 2 : 1).

**<sup>1</sup>H NMR (500 MHz, CDCl<sub>3</sub>):** δ 7.38 – 7.35 (m, 3H), 7.31 – 7.29 (m, 2H), 3.82 (s, 1H), 3.53 (s, 1H), 1.52 (s, 6H), 1.16 (s, 6H).

**<sup>13</sup>C NMR (125 MHz, CDCl<sub>3</sub>):** δ 171.2, 139.1, 128.7, 128.6, 125.7, 50.9, 45.9, 20.9.

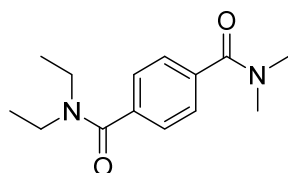

**N',N'-Diethyl-N,N'-dimethylterephthalamide (1nn)**: prepared by method C, white solid: 0.98 g, 79% yield, mp 121 – 123 °C.

**Purification:** flash column chromatography (300-400 mesh silica gel, PE : EA = 1 : 1).

**<sup>1</sup>H NMR (500 MHz, CDCl<sub>3</sub>):** δ 7.43 (d, *J* = 8.0 Hz, 2H), 7.39 (d, *J* = 8.0 Hz, 2H), 3.53 (s, 2H), 3.21 (s, 2H), 3.10 (s, 3H), 2.95 (s, 3H), 1.24 (s, 3H), 1.07 (s, 3H).

**<sup>13</sup>C NMR (125 MHz, CDCl<sub>3</sub>):** δ 171.1, 170.7, 138.5, 137.2, 127.3, 126.5, 43.3, 39.6, 39.4, 35.5, 14.3, 13.0.

**IR (KBr)  $\nu$ (cm<sup>-1</sup>):** 3428, 2986, 2935, 1618, 1517, 1430, 1393, 1095, 881, 737, 591.



**HRMS – ESI (m/z):**  $[M + H]^+$  called for  $C_{14}H_{21}N_2O_2$ , 249.1603, found 249.1604.

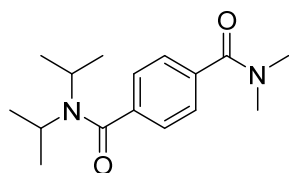

***N',N'*-Diisopropyl-*N,N'*-dimethylterephthalamide (100):** prepared by method C, white solid: 0.92 g, 67% yield, mp 152 – 154 °C.

**Purification:** flash column chromatography (300-400 mesh silica gel, PE : EA= 1 : 1).

**<sup>1</sup>H NMR (500 MHz, CDCl<sub>3</sub>):** δ 7.43 (d, *J* = 8.0 Hz, 2H), 7.33 (d, *J* = 8.0 Hz, 2H), 3.80 (s, 1H), 3.51 (br, 1H), 3.11 (s, 3H), 2.96 (s, 3H), 1.53 (s, 6H), 1.12 (s, 6H).

**<sup>13</sup>C NMR (125 MHz, CDCl<sub>3</sub>):** δ 171.2, 170.4, 140.1, 136.8, 127.3, 125.8, 51.1, 46.1, 39.7, 35.5, 20.8.

**IR (KBr)  $\nu$ (cm<sup>-1</sup>):** 3444, 3974, 2931, 1627, 1513, 1442, 1395, 1341, 1079, 855, 754.

**HRMS – ESI (m/z):**  $[M + H]^+$  called for  $C_{16}H_{24}N_2O_2Na$ , 299.1735, found 299.1734.

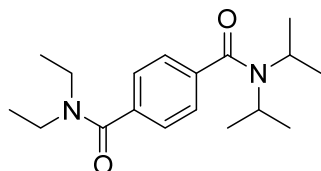

***N',N'*-Diethyl-*N,N'*-diisopropylterephthalamide (1pp):** prepared by method C, white solid: 0.78 g, 51% yield, mp 171 – 173 °C.

**Purification:** flash column chromatography (300-400 mesh silica gel, PE : EA= 1 : 1).

**<sup>1</sup>H NMR (500 MHz, CDCl<sub>3</sub>):** δ 7.38 – 7.36 (m, 2H), 7.33 – 7.31 (m, 2H), 3.81 (br, 1H), 3.56 – 3.48 (m, 3H), 3.23 – 3.21 (m, 2H), 1.53 (s, 6H), 1.25 – 1.06 (m, 12H).

**<sup>13</sup>C NMR (125 MHz, CDCl<sub>3</sub>):** δ 170.9, 170.5, 139.7, 137.7, 126.6, 125.9, 51.0, 46.1, 43.4, 39.4, 20.8, 14.3, 13.0.

**IR (KBr)  $\nu$ (cm<sup>-1</sup>):** 3428, 2969, 3931, 1624, 1510, 1443, 1424, 1344, 1099, 1037, 858, 830, 594.

**HRMS – ESI (m/z):**  $[M + H]^+$  called for  $C_{18}H_{29}N_2O_2$ , 305.2229, found 305.2228.

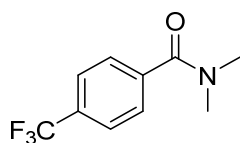

***N,N*-Dimethyl-4-(trifluoromethyl)benzamide (1b)<sup>2l</sup>:** prepared by method A, white solid: 1.63 g, 75% yield, mp 89 – 91 °C.

**Purification:** flash column chromatography (300-400 mesh silica gel, PE : EA= 3 : 1).

**<sup>1</sup>H NMR (500 MHz, CDCl<sub>3</sub>):** δ 7.67 (d, *J* = 8.0 Hz, 2H), 7.52 (d, *J* = 8.0 Hz, 2H), 3.12 (s, 3H), 2.96 (s, 3H).

**<sup>13</sup>C NMR (125 MHz, CDCl<sub>3</sub>):** δ 170.3, 140.0, 131.6 (q, <sup>2</sup>*J*<sub>C-F</sub> = 32.5 Hz), 127.5, 125.6 (q, <sup>3</sup>*J*<sub>C-F</sub> = 3.6 Hz), 123.9 (q, <sup>3</sup>*J*<sub>C-F</sub> = 270.5 Hz), 39.5, 35.4.

**<sup>19</sup>F NMR (470 MHz, CDCl<sub>3</sub>):** δ -62.9.

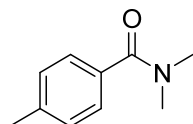

*N,N,4-Trimethylbenzamide (1c)*<sup>11</sup>: prepared by method A, white solid: 1.37 g, 84% yield, mp 42 – 44 °C.

**Purification:** flash column chromatography (300-400 mesh silica gel, PE : EA= 2 : 1).

**<sup>1</sup>H NMR (400 MHz, CDCl<sub>3</sub>):** δ 7.31 (d, *J* = 7.6 Hz, 2H), 7.18 (d, *J* = 7.6 Hz, 2H), 3.08 (s, 3H), 2.98 (s, 3H), 2.36 (s, 3H).

**<sup>13</sup>C NMR (100 MHz, CDCl<sub>3</sub>):** δ 171.9, 139.7, 133.5, 129.0, 127.3, 39.7, 35.5, 21.5.

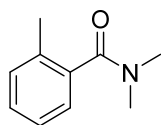

*N,N,2-Trimethylbenzamide (1d)*<sup>12</sup>: prepared by method A, colorless liquid: 1.27 g, 78% yield.

**Purification:** flash column chromatography (300-400 mesh silica gel, PE : EA= 2 : 1).

**<sup>1</sup>H NMR (500 MHz, CDCl<sub>3</sub>):** δ 7.30 – 7.17 (m, 4H), 3.15 (s, 3H), 2.85 (s, 3H), 2.30 (s, 6H).

**<sup>13</sup>C NMR (125 MHz, CDCl<sub>3</sub>):** δ 171.7, 136.8, 134.1, 130.4, 128.9, 126.0, 125.9, 38.5, 34.7, 19.0.

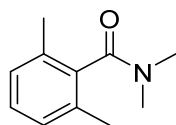

*N,N,2,6-Tetramethylbenzamide (1e)*<sup>12</sup>: prepared by method A, beige solid: 1.16 g, 65% yield, mp 55 – 57 °C.

**Purification:** flash column chromatography (300-400 mesh silica gel, PE : EA= 2 : 1).

**<sup>1</sup>H NMR (500 MHz, CDCl<sub>3</sub>):** δ 7.12 (t, *J* = 7.5 Hz, 1H), 7.00 (d, *J* = 7.5 Hz, 2H), 3.14 (s, 3H), 2.78 (s, 3H), 2.21 (s, 6H).

**<sup>13</sup>C NMR (125 MHz, CDCl<sub>3</sub>):** δ 171.4, 136.8, 133.6, 128.3, 127.5, 37.5, 34.2, 19.0.

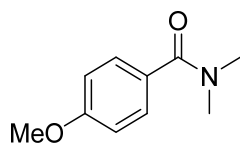

*4-Methoxy-N,N-dimethylbenzamide (1f)*<sup>11</sup>: prepared by method A, colorless liquid: 1.53 g, 85% yield.

**Purification:** flash column chromatography (300-400 mesh silica gel, PE : EA= 2 : 1).

**<sup>1</sup>H NMR (500 MHz, CDCl<sub>3</sub>):** δ 7.40 – 7.38 (m, 2H), 6.91 – 6.88 (m, 2H), 3.82 (s, 3H), 3.04 (s, 6H).

**<sup>13</sup>C NMR (125 MHz, CDCl<sub>3</sub>):** δ 171.6, 160.7, 129.2, 128.5, 113.7, 55.4, 39.9, 35.7.

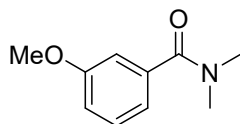

**3-Methoxy-*N,N*-dimethylbenzamide (1g)**<sup>[33]</sup>: prepared by method A, colorless oil: 1.56 g, 87% yield.

**Purification:** flash column chromatography (300-400 mesh silica gel, PE : EA= 2 : 1).

**<sup>1</sup>H NMR (400 MHz, CDCl<sub>3</sub>):** δ 7.30 (t, *J* = 7.6 Hz, 1H), 6.97 – 6.93 (m, 3H), 3.81 (s, 3H), 3.10 (s, 3H), 2.97 (s, 3H).

**<sup>13</sup>C NMR (100 MHz, CDCl<sub>3</sub>):** δ 171.4, 159.5, 137.7, 129.5, 119.1, 115.4, 112.4, 55.3, 39.5, 35.3.

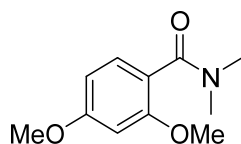

**3-Methoxy-*N,N*-dimethylbenzamide (1h)**<sup>[34]</sup>: prepared by method A, pale yellow oil: 1.88 g, 90% yield.

**Purification:** flash column chromatography (300-400 mesh silica gel, PE : EA= 2 : 1).

**<sup>1</sup>H NMR (500 MHz, CDCl<sub>3</sub>):** δ 7.13 (d, *J* = 8.5 Hz, 1H), 6.46 (dd, *J* = 8.5, 2.0 Hz, 1H), 6.41 (d, *J* = 2.0 Hz, 1H), 3.772 (s, 3H), 3.765 (s, 3H), 3.05 (s, 3H), 2.81 (s, 3H).

**<sup>13</sup>C NMR (125 MHz, CDCl<sub>3</sub>):** δ 169.4, 161.6, 156.7, 129.0, 119.1, 104.8, 98.5, 55.6, 55.5, 38.4, 34.9.

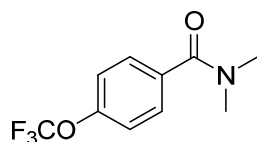

***N,N*-Dimethyl-4-(trifluoromethoxy)benzamide (1i)**<sup>[21]</sup>: prepared by method A, white solid: 1.72 g, 74% yield, mp 58 – 60 °C.

**Purification:** flash column chromatography (300-400 mesh silica gel, PE : EA= 3 : 1).

**<sup>1</sup>H NMR (400 MHz, CDCl<sub>3</sub>):** δ 7.46 (d, *J* = 8.0 Hz, 2H), 7.23 (d, *J* = 8.0 Hz, 2H), 3.10 (s, 3H), 2.97 (s, 3H).

**<sup>13</sup>C NMR (100 MHz, CDCl<sub>3</sub>):** δ 170.4, 150.0 (q, <sup>3</sup>*J*<sub>C-F</sub> = 1.8 Hz), 135.0, 129.0, 120.9, 120.5 (q, <sup>1</sup>*J*<sub>C-F</sub> = 256.3 Hz), 39.7, 35.5.

**<sup>19</sup>F NMR (470 MHz, CDCl<sub>3</sub>):** δ -57.8.

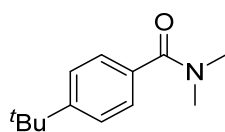

**4-(*tert*-Butyl)-*N,N*-dimethylbenzamide (1j)**<sup>[21]</sup>: prepared by method A, white solid: 1.60 g, 78% yield, mp 85 – 87 °C.

**Purification:** flash column chromatography (300-400 mesh silica gel, PE : EA= 2 : 1).

**<sup>1</sup>H NMR (500 MHz, CDCl<sub>3</sub>):** δ 7.40 (d, *J* = 8.0 Hz, 2H), 7.35 (d, *J* = 8.0 Hz, 2H), 3.09 (s, 3H), 3.00 (s, 3H), 1.31 (s, 9H).

**<sup>13</sup>C NMR (125 MHz, CDCl<sub>3</sub>):** δ 171.9, 152.8, 133.5, 127.1, 125.3, 39.8, 35.5, 34.9, 31.3.

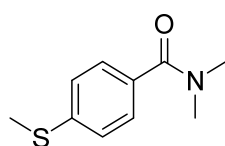

*N,N*-Dimethyl-4-(methylthio)benzamide (**1k**)<sup>[35]</sup>: prepared by method A, light yellow oil: 1.48 g, 76% yield.

**Purification:** flash column chromatography (300-400 mesh silica gel, PE : EA= 2 : 1).

**<sup>1</sup>H NMR (400 MHz, CDCl<sub>3</sub>):** δ 7.32 (d, *J* = 8.4 Hz, 2H), 7.21 (d, *J* = 8.4 Hz, 2H), 3.05 (s, 3H), 2.97 (s, 3H), 2.46 (s, 3H).

**<sup>13</sup>C NMR (100 MHz, CDCl<sub>3</sub>):** δ 171.2, 140.8, 132.6, 127.8, 125.7, 39.7, 35.5, 15.4.

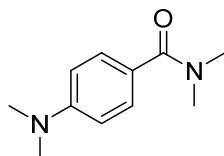

4-(Nimethylamino)-*N,N*-dimethylbenzamide (**1l**)<sup>[2]</sup>: prepared by method A, yellow solid: 1.69 g, 88% yield, mp 89 – 91 °C.

**Purification:** flash column chromatography (300-400 mesh silica gel, PE : EA= 2 : 1).

**<sup>1</sup>H NMR (400 MHz, CDCl<sub>3</sub>):** δ 7.36 (d, *J* = 8.4 Hz, 2H), 6.65 (d, *J* = 8.4 Hz, 2H), 3.04 (s, 6H), 2.97 (s, 6H).

**<sup>13</sup>C NMR (100 MHz, CDCl<sub>3</sub>):** δ 1172.2, 151.4, 129.3, 123.2, 111.1, 40.3 (4C).

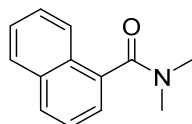

*N,N*-Dimethyl-1-naphthamideimethylbenzamide (**1m**)<sup>[35]</sup>: prepared by method A, yellow liquid: 1.44 g, 72% yield.

**Purification:** flash column chromatography (300-400 mesh silica gel, PE : EA= 2 : 1).

**<sup>1</sup>H NMR (500 MHz, CDCl<sub>3</sub>):** δ 7.84 – 7.82 (m, 2H), 7.78 – 7.76 (m, 1H), 7.51 – 7.43 (m, 3H), 7.40 – 7.38 (m, 1H), 3.21 (s, 3H), 2.75 (s, 3H).

**<sup>13</sup>C NMR (125 MHz, CDCl<sub>3</sub>):** δ 170.8, 134.7, 133.4, 129.4, 128.9, 128.4, 126.9, 126.3, 125.1, 124.8, 123.8, 38.8, 34.8.

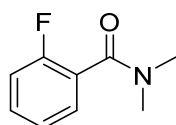

2-Fluoro-*N,N*-dimethylbenzamide (**1n**)<sup>[36]</sup>: prepared by method A, colorless liquid: 1.14 g, 68% yield.

**Purification:** flash column chromatography (300-400 mesh silica gel, PE : EA= 3 : 1).

**<sup>1</sup>H NMR (500 MHz, CDCl<sub>3</sub>):** δ 7.33 – 7.29 (m, 2H), 7.12 (t, *J* = 7.5 Hz, 1H), 7.01 (t, *J* = 9.0 Hz, 1H), 3.05 (s, 3H), 2.85 (s, 3H).

**<sup>13</sup>C NMR (125 MHz, CDCl<sub>3</sub>):** δ 166.7, 158.1 (d, <sup>1</sup>*J*<sub>C-F</sub> = 246.0 Hz), 131.1 (d, <sup>3</sup>*J*<sub>C-F</sub> = 7.9 Hz), 128.9 (d, <sup>2</sup>*J*<sub>C-F</sub> = 3.7 Hz), 124.7, 124.5 (d, <sup>3</sup>*J*<sub>C-F</sub> = 3.5 Hz), 115.6 (d, <sup>2</sup>*J*<sub>C-F</sub> = 21.4 Hz), 38.2 (d, *J*<sub>C-F</sub> = 2.7 Hz), 34.9.

**<sup>19</sup>F NMR (470 MHz, CDCl<sub>3</sub>):** δ -115.3.

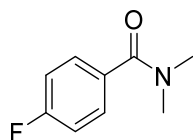

**4-Fluoro-*N,N*-dimethylbenzamide (1o)**<sup>[2]</sup>: prepared by method A, light yellow liquid: 1.20 g, 72% yield.

**Purification:** flash column chromatography (300-400 mesh silica gel, PE : EA = 3 : 1).

**<sup>1</sup>H NMR (500 MHz, CDCl<sub>3</sub>):** δ 7.43 – 7.40 (m, 2H), 7.09 – 7.05 (m, 2H), 3.09 (s, 3H), 2.98 (s, 3H).

**<sup>13</sup>C NMR (125 MHz, CDCl<sub>3</sub>):** δ 170.8, 163.4 (d, <sup>1</sup>J<sub>C-F</sub> = 248.0 Hz), 132.4 (d, <sup>4</sup>J<sub>C-F</sub> = 3.4 Hz), 129.4 (d, <sup>3</sup>J<sub>C-F</sub> = 8.5 Hz), 115.5 (d, <sup>3</sup>J<sub>C-F</sub> = 21.6 Hz), 39.8, 35.6.

**<sup>19</sup>F NMR (470 MHz, CDCl<sub>3</sub>):** δ -110.8.

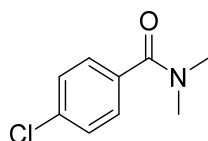

**4-Chloro-*N,N*-dimethylbenzamide (1p)**<sup>[1]</sup>: prepared by method A, colorless liquid: 1.38 g, 75% yield.

**Purification:** flash column chromatography (300-400 mesh silica gel, PE : EA = 3 : 1).

**<sup>1</sup>H NMR (500 MHz, CDCl<sub>3</sub>):** δ 7.33 (s, 4H), 3.06 (s, 3H), 2.93 (s, 3H).

**<sup>13</sup>C NMR (125 MHz, CDCl<sub>3</sub>):** δ 170.5, 135.6, 134.7, 128.65, 128.63, 39.6, 35.4.

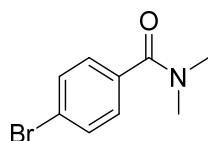

**4-Bromo-*N,N*-dimethylbenzamide (1q)**<sup>[37]</sup>: prepared by method A, white solid: 1.86 g, 82% yield, mp 52 – 54 °C.

**Purification:** flash column chromatography (300-400 mesh silica gel, PE : EA = 3 : 1).

**<sup>1</sup>H NMR (500 MHz, CDCl<sub>3</sub>):** δ 7.55 – 7.53 (m, 2H), 7.31 – 7.29 (m, 2H), 3.10 (s, 3H), 2.97 (s, 3H).

**<sup>13</sup>C NMR (125 MHz, CDCl<sub>3</sub>):** δ 170.5, 135.1, 131.6, 128.8, 123.8, 39.5, 35.4.

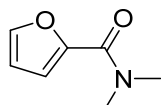

***N,N*-Dimethylfuran-2-carboxamide (1r)**<sup>[35]</sup>: prepared by method A, brown solid: 0.99 g, 71% yield, mp 32 – 34 °C.

**Purification:** flash column chromatography (300-400 mesh silica gel, PE : EA = 4 : 1).

**<sup>1</sup>H NMR (500 MHz, CDCl<sub>3</sub>):** δ 7.43 – 7.42 (m, 1H), 6.91 – 6.90 (m, 1H), 6.40 – 6.39 (m, 1H), 3.20 (s, 3H), 3.02 (s, 3H).

**<sup>13</sup>C NMR (125 MHz, CDCl<sub>3</sub>):** δ 160.3, 148.1, 143.7, 115.9, 111.1, 38.2, 36.3.

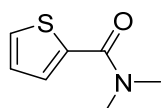

***N,N*-Dimethylthiophene-2-carboxamide (1s)**<sup>[35]</sup>: prepared by method A, yellow liquid: 1.21 g, 78%

yield.

**Purification:** flash column chromatography (300-400 mesh silica gel, PE : EA= 4 : 1).

**<sup>1</sup>H NMR (500 MHz, CDCl<sub>3</sub>):** δ 7.41 – 7.40 (m, 1H), 7.32 – 7.31 (m, 1H), 7.01 – 6.99 (m, 1H), 3.14 (s, 6H).

**<sup>13</sup>C NMR (125 MHz, CDCl<sub>3</sub>):** δ 164.4, 137.9, 129.2, 128.8, 126.7, 39.5, 36.6.

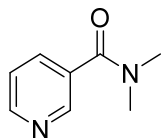

**N,N-Dimethylnicotinamide (1t)**<sup>[38]</sup>: prepared by method A, white solid: 1.23 g, 82% yield, mp 45 – 47 °C.

**Purification:** flash column chromatography (300-400 mesh silica gel, PE : EA= 4 : 1).

**<sup>1</sup>H NMR (500 MHz, CDCl<sub>3</sub>):** δ 8.63 – 8.62 (m, 1H), 8.60 – 8.59 (m, 1H), 7.72 – 7.70 (m, 1H), 7.31 – 7.29 (m, 1H), 3.07 (s, 3H), 2.96 (s, 3H).

**<sup>13</sup>C NMR (125 MHz, CDCl<sub>3</sub>):** δ 169.0, 150.6, 148.0, 134.9, 132.1, 123.4, 39.5, 35.4.

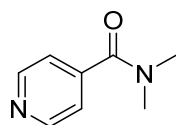

**N,N-Dimethylisonicotinamide (1u)**<sup>[38]</sup>: prepared by method A, brown solid: 1.14 g, 76% yield, mp 44 – 46 °C.

**Purification:** flash column chromatography (300-400 mesh silica gel, PE : EA= 4 : 1).

**<sup>1</sup>H NMR (500 MHz, CDCl<sub>3</sub>):** δ 8.67 – 8.66 (m, 2H), 7.28 – 7.27 (m, 2H), 3.10 (s, 3H), 2.93 (s, 3H).

**<sup>13</sup>C NMR (125 MHz, CDCl<sub>3</sub>):** δ 169.1, 150.3, 144.0, 121.3, 39.3, 35.3.

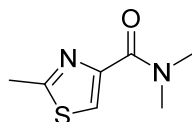

**N,N,2-Trimethylthiazole-4-carboxamide (1v)**: prepared by method A, yellow liquid: 1.24 g, 73% yield.

**Purification:** flash column chromatography (300-400 mesh silica gel, PE : EA= 5 : 1).

**<sup>1</sup>H NMR (500 MHz, CDCl<sub>3</sub>):** δ 7.65 (s, 1H), 3.21 (s, 3H), 3.07 (s, 3H), 2.70 (s, 3H).

**<sup>13</sup>C NMR (125 MHz, CDCl<sub>3</sub>):** δ 165.1, 164.5, 150.5, 123.0, 39.0, 36.1, 19.2.

**IR (KBr) ν(cm<sup>-1</sup>):** 3457, 2927, 1631, 1517, 1394, 1253, 1167, 961, 832, 748.

**HRMS – ESI (m/z):** [M + Na]<sup>+</sup> called for C<sub>7</sub>H<sub>10</sub>N<sub>2</sub>OSNa, 193.0412, found 193.0410.

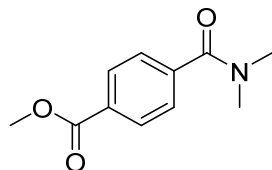

**Methyl 4-(dimethylcarbamoyl)benzoate (1w)**<sup>[35]</sup>: prepared by method A, white solid: 1.53 g, 74% yield,

mp 96 – 98 °C.

**Purification:** flash column chromatography (300-400 mesh silica gel, PE : EA= 2 : 1).

**<sup>1</sup>H NMR (500 MHz, CDCl<sub>3</sub>):** δ 8.07 (d, *J* = 8.5 Hz, 2H), 7.47 (d, *J* = 8.5 Hz, 2H), 3.92 (s, 3H), 3.12 (s, 3H), 2.94 (s, 3H).

**<sup>13</sup>C NMR (125 MHz, CDCl<sub>3</sub>):** δ 170.7, 166.5, 140.8, 131.1, 129.8, 127.1, 52.4, 39.5, 35.4.

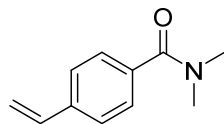

***N,N*-Dimethyl-4-vinylbenzamide (1x)<sup>[39]</sup>:** prepared by method A, yellow solid: 1.21 g, 69% yield, mp 51 – 53 °C.

**Purification:** flash column chromatography (300-400 mesh silica gel, PE : EA= 3 : 1).

**<sup>1</sup>H NMR (500 MHz, CDCl<sub>3</sub>):** δ 7.41 (d, *J* = 8.5 Hz, 2H), 7.37 (d, *J* = 8.5 Hz, 2H), 6.73 – 6.67 (m, 1H), 5.78 (d, *J* = 18.0 Hz, 1H), 5.29 (d, *J* = 11.0 Hz, 1H), 3.08 (s, 3H), 2.97 (s, 3H).

**<sup>13</sup>C NMR (125 MHz, CDCl<sub>3</sub>):** δ 171.3, 138.7, 136.1, 135.5, 127.5, 126.1, 115.1, 39.6, 35.4.

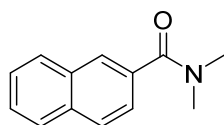

***N,N*-Dimethyl-2-naphthamideimethylbenzamide (1y)<sup>[40]</sup>:** prepared by method A, white solid: 1.56 g, 78% yield, mp 84 – 86 °C.

**Purification:** flash column chromatography (300-400 mesh silica gel, PE : EA= 2 : 1).

**<sup>1</sup>H NMR (500 MHz, CDCl<sub>3</sub>):** δ 7.91 (s, 1H), 7.88 – 7.84 (m, 3H), 7.53 – 7.50 (m, 3H), 3.16 (s, 3H), 3.03 (s, 3H).

**<sup>13</sup>C NMR (125 MHz, CDCl<sub>3</sub>):** δ 171.8, 133.8, 133.7, 132.8, 128.5, 128.3, 127.9, 127.1, 127.0, 126.7, 124.5, 39.8, 35.6.

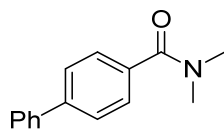

***N,N*-Dimethyl-[1,1'-biphenyl]-4-carboxamide (1z)<sup>[40]</sup>:** prepared by method A, white solid: 1.78 g, 79% yield, mp 104 – 106 °C.

**Purification:** flash column chromatography (300-400 mesh silica gel, PE : EA= 3 : 1).

**<sup>1</sup>H NMR (500 MHz, CDCl<sub>3</sub>):** δ 7.62 – 7.59 (m, 4H), 7.51 – 7.49 (m, 2H), 7.46 – 7.43 (m, 2H), 7.38 – 7.35 (m, 1H), 3.13 (s, 3H), 3.03 (s, 3H).

**<sup>13</sup>C NMR (125 MHz, CDCl<sub>3</sub>):** δ 171.5, 142.5, 140.4, 135.2, 128.9, 127.79, 127.73, 127.2, 127.1, 39.7, 35.5.

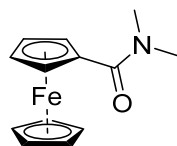

*N,N*-Dimethyl-ferrocenecarboxamide (**1aa**)<sup>[40]</sup>: prepared by method A, orange solid: 2.10 g, 82% yield, mp 110 – 112 °C.

**Purification**: flash column chromatography (300-400 mesh silica gel, PE : EA= 3 : 1).

**<sup>1</sup>H NMR (400 MHz, CDCl<sub>3</sub>)**: δ 4.62 (s, 2H), 4.30 (s, 2H), 4.22 (s, 5H), 3.12 (s, 6H).

**<sup>13</sup>C NMR (100 MHz, CDCl<sub>3</sub>)**: δ 170.9, 78.6, 70.7, 69.9, 69.4.

**IR (KBr) ν(cm<sup>-1</sup>)**: 3443, 3080, 2941, 1612, 1503, 1391, 1265, 1106, 1035, 819, 762, 682.

**HRMS – ESI (m/z)**: [M + H]<sup>+</sup> called for C<sub>13</sub>H<sub>16</sub>FeNO, 258.0581, found 258.0590.

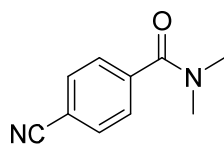

4-Cyano-*N,N*-dimethyl-3-phenylacrylamide (**1bb**)<sup>[35]</sup>: prepared by method A, beige solid: 1.39 g, 80% yield, mp 91 – 93 °C.

**Purification**: flash column chromatography (300-400 mesh silica gel, PE : EA= 2 : 1).

**<sup>1</sup>H NMR (500 MHz, CDCl<sub>3</sub>)**: δ 7.66 – 7.65 (m, 2H), 7.47 – 7.45 (m, 2H), 3.05 (s, 3H), 2.88 (s, 3H).

**<sup>13</sup>C NMR (125 MHz, CDCl<sub>3</sub>)**: δ 169.4, 140.7, 132.3, 127.7, 118.1, 113.2, 39.2, 35.2.

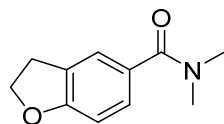

*N,N*-Dimethyl-2,3-dihydrobenzofuran-5-carboxamide (**1cc**): prepared by method A, yellow solid: 1.64 g, 86% yield, mp 63 – 65 °C.

**Purification**: flash column chromatography (300-400 mesh silica gel, PE : EA= 2 : 1).

**<sup>1</sup>H NMR (500 MHz, CDCl<sub>3</sub>)**: δ 7.32 (s, 1H), 7.20 – 7.18 (m, 1H), 6.77 – 6.75 (m, 1H), 4.60 (t, *J* = 9.0 Hz, 2H), 3.22 (t, *J* = 8.5 Hz, 2H), 3.05 (s, 6H).

**<sup>13</sup>C NMR (125 MHz, CDCl<sub>3</sub>)**: δ 171.9, 161.4, 128.5, 128.0, 127.3, 124.8, 108.8, 71.7, 39.9, 35.7, 29.5.

**IR (KBr) ν(cm<sup>-1</sup>)**: 3463, 2927, 1627, 1591, 1484, 1390, 1240, 982, 758.

**HRMS – ESI (m/z)**: [M + H]<sup>+</sup> called for C<sub>11</sub>H<sub>14</sub>NO<sub>2</sub>, 192.1025, found 192.1016.

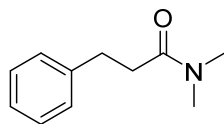

*N,N*-Dimethyl-3-phenylpropanamide (**1dd**)<sup>[41]</sup>: prepared by method A, light yellow liquid: 1.49 g, 84% yield.

**Purification**: flash column chromatography (300-400 mesh silica gel, PE : EA= 3 : 1).

**<sup>1</sup>H NMR (500 MHz, CDCl<sub>3</sub>)**: δ 7.32 – 7.29 (m, 2H), 7.25 – 7.20 (m, 3H), 2.99 (t, *J* = 8.5 Hz, 2H), 2.96 (s, 3H), 2.94 (s, 3H), 2.63 (t, *J* = 8.5 Hz, 2H).



**<sup>13</sup>C NMR (125 MHz, CDCl<sub>3</sub>):** δ 172.3, 141.6, 128.53, 128.49, 126.2, 37.2, 35.5, 35.4, 31.4.

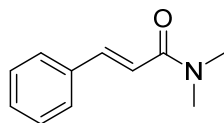

***N,N*-Dimethylcinnamamide (1ee)<sup>[33]</sup>:** prepared by method A, white solid: 1.50 g, 86% yield, mp 93 – 95 °C.

**Purification:** flash column chromatography (300-400 mesh silica gel, PE : EA= 2 : 1).

**<sup>1</sup>H NMR (500 MHz, CDCl<sub>3</sub>):** δ 7.66 (d, *J* = 15.5 Hz, 1H), 7.52 – 7.51 (m, 2H), 7.37 – 7.33 (m, 3H), 6.88 (d, *J* = 15.5 Hz, 1H), 3.16 (s, 3H), 3.06 (s, 3H).

**<sup>13</sup>C NMR (125 MHz, CDCl<sub>3</sub>):** δ 166.8, 142.4, 135.5, 129.6, 128.9, 127.9, 117.6, 37.5, 36.0.

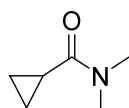

***N,N*-Dimethylcyclopropanecarboxamide (1tt)<sup>[42]</sup>:** prepared by method A, colorless oil: 1.03 g, 91% yield.

**Purification:** Distillation (70 – 71 °C, 5.0 mmHg).

**<sup>1</sup>H NMR (500 MHz, CDCl<sub>3</sub>):** δ 3.14 (s, 3H), 2.93 (s, 3H), 1.74 – 1.69 (m, 1H), 0.94 – 0.91 (m, 2H), 0.73 – 0.70 (m, 2H).

**<sup>13</sup>C NMR (125 MHz, CDCl<sub>3</sub>):** δ 173.5, 37.3, 35.9, 11.1, 7.4.

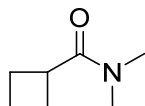

***N,N*-Dimethylcyclobutanecarboxamide (1uu)<sup>[43]</sup>:** prepared by method A, colorless oil: 1.13 g, 89% yield.

**Purification:** Distillation (68 – 70 °C, 0.1 mmHg).

**<sup>1</sup>H NMR (400 MHz, CDCl<sub>3</sub>):** δ 3.23 (m, 1H), 2.89 (s, 3H), 2.87 (s, 3H), 2.34 – 2.24 (m, 2H), 2.15 – 2.07 (m, 2H), 1.96 – 1.76 (m, 2H).

**<sup>13</sup>C NMR (100 MHz, CDCl<sub>3</sub>):** δ 174.6, 37.5, 36.6, 35.4, 25.1, 17.9.

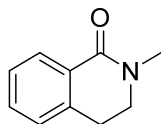

**2-Methyl-3,4-dihydroisoquinolin-1(2H)-one (1ww)<sup>[44]</sup>:** pale yellow oil: 1.47 g, 91% yield.

**Purification:** flash column chromatography (300-400 mesh silica gel, PE : EA= 1 : 2).

**<sup>1</sup>H NMR (400 MHz, CDCl<sub>3</sub>):** δ 8.07 (d, *J* = 7.6 Hz, 1H), 7.39 (t, *J* = 8.8 Hz, 1H), 7.32 (t, *J* = 7.6 Hz, 1H), 7.16 (d, *J* = 7.6 Hz, 1H), 3.56 (m, *J* = 6.5 Hz, 2H), 3.15 (s, 3H), 3.00 (t, *J* = 6.5 Hz, 2H).

**<sup>13</sup>C NMR (100 MHz, CDCl<sub>3</sub>):** δ 164.9, 138.1, 131.6, 129.5, 128.2, 127.1, 127.0, 48.2, 35.3, 28.0.

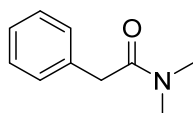

*N,N*-Dimethyl-2-phenylacetamide (**1xx**)<sup>[45]</sup>: prepared by method A, white solid: 1.16 g, 71% yield, mp 105 – 107 °C.

**Purification**: flash column chromatography (300-400 mesh silica gel, PE : EA = 3 : 1).

**<sup>1</sup>H NMR (400 MHz, CDCl<sub>3</sub>)**: δ 7.36 – 7.32 (m, 2H), 7.29 – 7.24 (m, 3H), 3.74 (s, 2H), 3.01 (s, 3H), 2.99 (s, 3H).

**<sup>13</sup>C NMR (100 MHz, CDCl<sub>3</sub>)**: δ 171.1, 135.2, 128.8, 128.7, 126.8, 41.1, 37.8, 35.7.

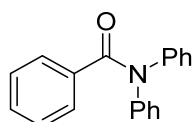

*N,N*-Diphenylbenzamide (**1zz**)<sup>[46]</sup>: prepared by method B, white solid: 2.64 g, 96% yield, mp 176 – 178 °C.

**Purification**: flash column chromatography (300-400 mesh silica gel, PE : EA : DCM = 2 : 1 : 0.05).

**<sup>1</sup>H NMR (500 MHz, CDCl<sub>3</sub>)**: δ 7.46 – 7.45 (m, 2H), 7.30 – 7.27 (m, 5H), 7.22 – 7.15 (m, 8H).

**<sup>13</sup>C NMR (125 MHz, CDCl<sub>3</sub>)**: δ 170.8, 144.0, 136.2, 130.3, 129.3, 129.2, 128.0, 127.6, 126.5.

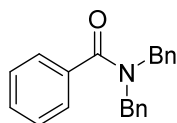

*N,N*-Dibenzylbenzamide (**1aaa**)<sup>[46]</sup>: prepared by method B, white solid: 2.58 g, 86% yield, mp 109 – 111 °C.

**Purification**: flash column chromatography (300-400 mesh silica gel, PE : EA : DCM = 2 : 1 : 0.05).

**<sup>1</sup>H NMR (500 MHz, CDCl<sub>3</sub>)**: δ 7.52 – 7.50 (m, 2H), 7.40 – 7.35 (m, 11H), 7.16 – 7.14 (m, 2H), 4.71 (s, 2H), 4.41 (s, 2H).

**<sup>13</sup>C NMR (125 MHz, CDCl<sub>3</sub>)**: δ 172.4, 137.1, 136.6, 136.3, 129.8, 129.0, 128.8, 128.7, 128.5, 127.8, 127.7, 127.2, 126.8, 51.7, 47.0.

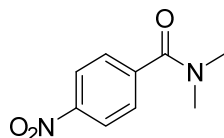

*N,N*-Dimethyl-4-nitrobenzamide (**1bbb**)<sup>[36]</sup>: prepared by method A, white solid: 1.48 g, 76% yield, mp 94 – 96 °C.

**Purification**: flash column chromatography (300-400 mesh silica gel, PE : EA = 1 : 1).

**<sup>1</sup>H NMR (500 MHz, CDCl<sub>3</sub>)**: δ 8.26 (d, *J* = 9.0 Hz, 2H), 7.57 (d, *J* = 8.5 Hz, 2H), 3.13 (s, 3H), 2.95 (s, 3H).

**<sup>13</sup>C NMR (125 MHz, CDCl<sub>3</sub>)**: δ 169.3, 148.4, 142.6, 128.2, 123.9, 39.4, 35.4.

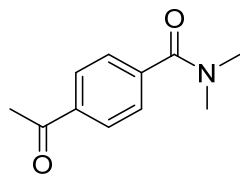

**4-Acetyl-*N,N*-dimethylbenzamide (1ccc)**<sup>471</sup>: prepared by method A, orange solid: 1.42 g, 74% yield, mp 61 – 63 °C.

**Purification**: flash column chromatography (300-400 mesh silica gel, PE : EA= 2 : 1).

**<sup>1</sup>H NMR (500 MHz, CDCl<sub>3</sub>)**: δ 7.95 (d, *J* = 8.5 Hz, 2H), 7.47 (d, *J* = 8.5 Hz, 2H), 3.09 (s, 3H), 2.92 (s, 3H), 2.59 (s, 3H).

**<sup>13</sup>C NMR (125 MHz, CDCl<sub>3</sub>)**: δ 197.5, 170.5, 140.8, 137.7, 128.5, 127.3, 39.4, 35.3, 26.8.

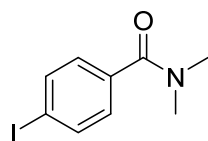

**4-Iodo-*N,N*-dimethylbenzamide (1ddd)**<sup>371</sup>: prepared by method A, white solid: 1.84 g, 67% yield, mp 111 – 113 °C.

**Purification**: flash column chromatography (300-400 mesh silica gel, PE : EA= 2 : 1).

**<sup>1</sup>H NMR (500 MHz, CDCl<sub>3</sub>)**: δ 7.76 – 7.74 (m, 2H), 7.17 – 7.15 (m, 2H), 3.09 (s, 3H), 2.97 (s, 3H).

**<sup>13</sup>C NMR (125 MHz, CDCl<sub>3</sub>)**: δ 170.8, 137.7, 135.8, 129.0, 95.8, 39.6, 35.5.

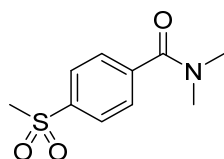

***N,N*-Dimethyl-4-(methylsulfonyl)benzamide (1eee)**: prepared by method A, white solid: 1.77 g, 78% yield, mp 152 – 154 °C.

**Purification**: flash column chromatography (300-400 mesh silica gel, PE : EA= 2 : 1).

**<sup>1</sup>H NMR (500 MHz, CDCl<sub>3</sub>)**: δ 7.98 (d, *J* = 6.5 Hz, 2H), 7.59 (d, *J* = 6.5 Hz, 2H), 3.12 (s, 3H), 3.05 (s, 3H), 2.94 (s, 3H).

**<sup>13</sup>C NMR (125 MHz, CDCl<sub>3</sub>)**: δ 169.7, 141.9, 141.5, 128.0, 127.8, 44.5, 39.4, 35.4.

**IR (KBr)  $\nu$ (cm<sup>-1</sup>)**: 3461, 3004, 2917, 1629, 1510, 1395, 1303, 1285, 1150, 1091, 1078, 966, 782.

**HRMS – ESI (m/z)**: [M + H]<sup>+</sup> called for C<sub>10</sub>H<sub>14</sub>NO<sub>3</sub>S, 228.0694, found 228.0682.

### 8.3 General Synthesis Procedure and Characterization for Silane

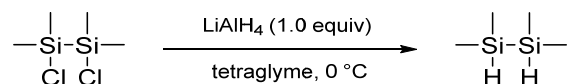

LiAlH<sub>4</sub> (759 mg, 20.0 mmol, 1.0 equiv) and dry tetraglyme (20.0 mL) were stirred in a dry three-neck round-bottomed flask at 0 °C until there are no bubbles. The solution of 1,2-dichloro-1,1,2,2-tetramethyldisilane (3.74 g, 20.0 mmol, 1.0 equiv) in dry tetraglyme (10.0 mL) was added dropwise into the flask within 10 min. The mixture was stirred for 15 min at 0 °C and for 2 h at room temperature. Then the product, 1,1,2,2-tetramethyldisilane, was vacuum-transferred into a clean cold trap (-40 °C).

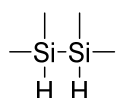

**1,1,2,2-Tetramethyldisilane**<sup>[48]</sup>: colorless liquid: 2.10 g, 89% yield.

**Purification**: trapped in cold (-40 °C) under vacuum (1.0 mmHg).

**<sup>1</sup>H NMR (500 MHz, CDCl<sub>3</sub>)**: δ 3.70 (m, 2H), 0.17 – 0.16 (m, 12H).

**<sup>13</sup>C NMR (125 MHz, CDCl<sub>3</sub>)**: δ -6.3.

**<sup>29</sup>Si NMR (99 MHz, CDCl<sub>3</sub>)**: δ -39.0.

## 9. References

- [1] C. L. Bailey, A. Y. Joh, Z. Q. Hurley, C. L. Anderson, B. Singaram, *J. Org. Chem.* **2016**, *81*, 3619-3628.
- [2] S. S. R. Gupta, A. V. Nakhate, K. B. Rasal, G. P. Deshmukh, L. K. Mannepilli, *New J. Chem.* **2017**, *41*, 15268-15276.
- [3] G.-F. Zha, W.-Y. Fang, J. Leng, H.-L. Qin, *Adv. Synth. Catal.* **2019**, *361*, 2262-2267.
- [4] I. Kumar, R. Kumar, S. S. Gupta, U. Sharma, *J. Org. Chem.* **2021**, *86*, 6449-6457.
- [5] D. Liu, H. Zhou, X. Gu, X. Shen, P. Li, *Chin. J. Chem.* **2014**, *32*, 117-122.
- [6] C. Cheng, M. Brookhart, *Angew. Chem. Int. Ed.* **2012**, *51*, 9422-9424.
- [7] Q. Feng, Q. Song, *J. Org. Chem.* **2014**, *79*, 1867-1871.
- [8] Z. Liu, Z. Yang, B. Yu, X. Yu, H. Zhang, Y. Zhao, P. Yang, Z. Liu, *Org. Lett.* **2018**, *20*, 5130-5134.
- [9] J. Wang, B.-F. Sun, K. Cui, G.-Q. Lin, *Org. Lett.* **2012**, *14*, 6354-6357.
- [10] C.-T. Yang, J. Han, J. Liu, Y. Li, F. Zhang, H.-Z. Yu, S. Hu, X. Wang, *Chem. Eur. J.* **2018**, *24*, 10324-10328.
- [11] R. A. Arthurs, M. Ismail, C. C. Prior, V. S. Oganessian, P. N. Horton, S. J. Coles, C. J. Richards, *Chem. Eur. J.* **2016**, *22*, 3065-3072.
- [12] M. Zhang, N. Li, X. Tao, R. Ruzi, S. Yu, C. Zhu, *Chem. Commun.* **2017**, *53*, 10228-10231.
- [13] G. Pelletier, W. S. Bechara, A. B. Charette, *J. Am. Chem. Soc.* **2010**, *132*, 12817-12819.
- [14] P. Xiao, Z. Tang, K. Wang, H. Chen, Q. Guo, Y. Chu, L. Gao, Z. Song, *J. Org. Chem.* **2018**, *83*, 1687-1700.
- [15] X.-F. Wu, H. Neumann, M. Beller, *Chem. Commun.* **2011**, *47*, 7959-7961.
- [16] L. Han, S.-J. Li, X.-T. Zhang, S.-K. Tian, *Chem. Eur. J.* **2021**, *27*, 3091-3097.
- [17] M. Perscheid, D. Schollmeyer, U. Nubbemeyer, *Eur. J. Org. Chem.* **2011**, *2011*, 5250-5253.
- [18] Y. Zhao, J. Jin, P. W. H. Chan, *Adv. Synth. Catal.* **2019**, *361*, 1313-1321.
- [19] S. Park, M. Brookhart, *J. Am. Chem. Soc.* **2012**, *134*, 640-653.
- [20] B. Pribanic, M. Trincado, F. Eiler, M. Vogt, A. Comas-Vives, H. Grützmacher, *Angew. Chem. Int. Ed.* **2020**, *59*, 15603-15609.
- [21] T. Arenz, H. Frauenrath, G. Raabe, M. Zorn, *Liebigs Ann. Chem.* **1994**, *1994*, 931-942.
- [22] S. E. Varjosaari, V. Skrypai, P. Suating, J. J. M. Hurley, A. M. D. Lio, T. M. Gilbert, M. J. Adler, *Adv. Synth. Catal.* **2017**, *359*, 1872-1878.
- [23] B. Hatano, K. Nagahashi, T. Kijima, *J. Org. Chem.* **2008**, *73*, 9188-9191.

- 
- [24] J. Liu, Y. Song, X. Zhuang, M. Zhang, L. Ma, *Green Chem.* **2021**, *23*, 4604-4617.
- [25] P.-Q. Huang, W. Ou, F. Han, *Chem. Commun.* **2016**, *52*, 11967-11970.
- [26] Á. L. Fuentes de Arriba, E. Lenci, M. Sonawane, O. Formery, D. J. Dixon, *Angew. Chem. Int. Ed.* **2017**, *56*, 3655-3659.
- [27] T. M. Monos, J. N. Jaworski, J. C. Stephens, T. F. Jamison, *Synlett* **2020**, *31*, 1888-1893.
- [28] M. A. Hussein, A. H. Dinh, V. T. Huynh, T. V. Nguyen, *Chem. Commun.* **2020**, *56*, 8691-8694.
- [29] J. Zhang, Y. Hou, Y. Ma, M. Szostak, *J. Org. Chem.* **2019**, *84*, 338-345.
- [30] S. Das, D. Addis, S. Zhou, K. Junge, M. Beller, *J. Am. Chem. Soc.* **2010**, *132*, 1770-1771.
- [31] W. Fan, Y. Yang, J. Lei, Q. Jiang, W. Zhou, *J. Org. Chem.* **2015**, *80*, 8782-8789.
- [32] L. Bannwart, S. Abele, S. Tortoioli, *Synthesis* **2016**, *48*, 2069-2078.
- [33] H. Li, J. Xie, Q. Xue, Y. Cheng, C. Zhu, *Tetrahedron Lett.* **2012**, *53*, 6479-6482.
- [34] A. Uehara, S. Olivero, B. Michelet, A. Martin-Mingot, S. Thibaudeau, E. Duñach, *Eur. J. Org. Chem.* **2019**, *2019*, 46-49.
- [35] Z. Liu, J. Zhang, S. Chen, E. Shi, Y. Xu, X. Wan, *Angew. Chem. Int. Ed.* **2012**, *51*, 3231-3235.
- [36] M.-Z. Zhang, Q.-H. Guo, W.-B. Sheng, C.-C. Guo, *Adv. Synth. Catal.* **2015**, *357*, 2855-2861.
- [37] P. S. Kumar, G. S. Kumar, R. A. Kumar, N. V. Reddy, K. Rajender Reddy, *Eur. J. Org. Chem.* **2013**, *2013*, 1218-1222.
- [38] X. Bi, J. Li, E. Shi, H. Wang, R. Gao, J. Xiao, *Tetrahedron* **2016**, *72*, 8210-8214.
- [39] W. Lu, C. Li, X. Wu, X. Xie, Z. Zhang, *Organometallics* **2020**, *39*, 3780-3788.
- [40] D. Y. Ong, D. Fan, D. J. Dixon, S. Chiba, *Angew. Chem. Int. Ed.* **2020**, *59*, 11903-11907.
- [41] Y.-X. Xie, R.-J. Song, X.-H. Yang, J.-N. Xiang, J.-H. Li, *Eur. J. Org. Chem.* **2013**, *2013*, 5737-5742.
- [42] M. Kobeissi, K. Cherry, W. Jomaa, *Synth. Commun.* **2013**, *43*, 2955-2965.
- [43] T. Cuvigny, P. Hullot, P. Mulot, M. Larcheveque, H. Normant, *Can. J. Chem.* **1979**, *57*, 1201-1205.
- [44] S. Liu, M. Tian, X. Bu, H. Tian, X. Yang, *Chem. Eur. J.* **2021**, *27*, 7738-7744.
- [45] T. Slagbrand, A. Volkov, P. Trillo, F. Tinnis, H. Adolfsson, *ACS Catal.* **2017**, *7*, 1771-1775.
- [46] P. Ye, Y. Shao, X. Ye, F. Zhang, R. Li, J. Sun, B. Xu, J. Chen, *Org. Lett.* **2020**, *22*, 1306-1310.
- [47] S. K. Aavula, A. Chikkulapally, N. Hanumanthappa, I. Jyothi, C. H. V. Kumar, S. G. Manjunatha, S. K. Sythana, *J. Chem. Res.* **2013**, *37*, 155-159.
- [48] A. G. Sturm, T. Santowski, J. I. Schweizer, L. Meyer, K. M. Lewis, T. Felder, N. Auner, M. C. Holthausen, *Chem. Eur. J.* **2019**, *25*, 8499-8502.

## 10. NMR Spectra Copies of the Amides, Aldehydes and Amines

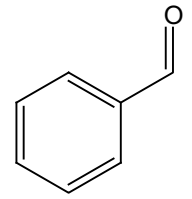

**2a**

**<sup>1</sup>H NMR (500 MHz, CDCl<sub>3</sub>)**

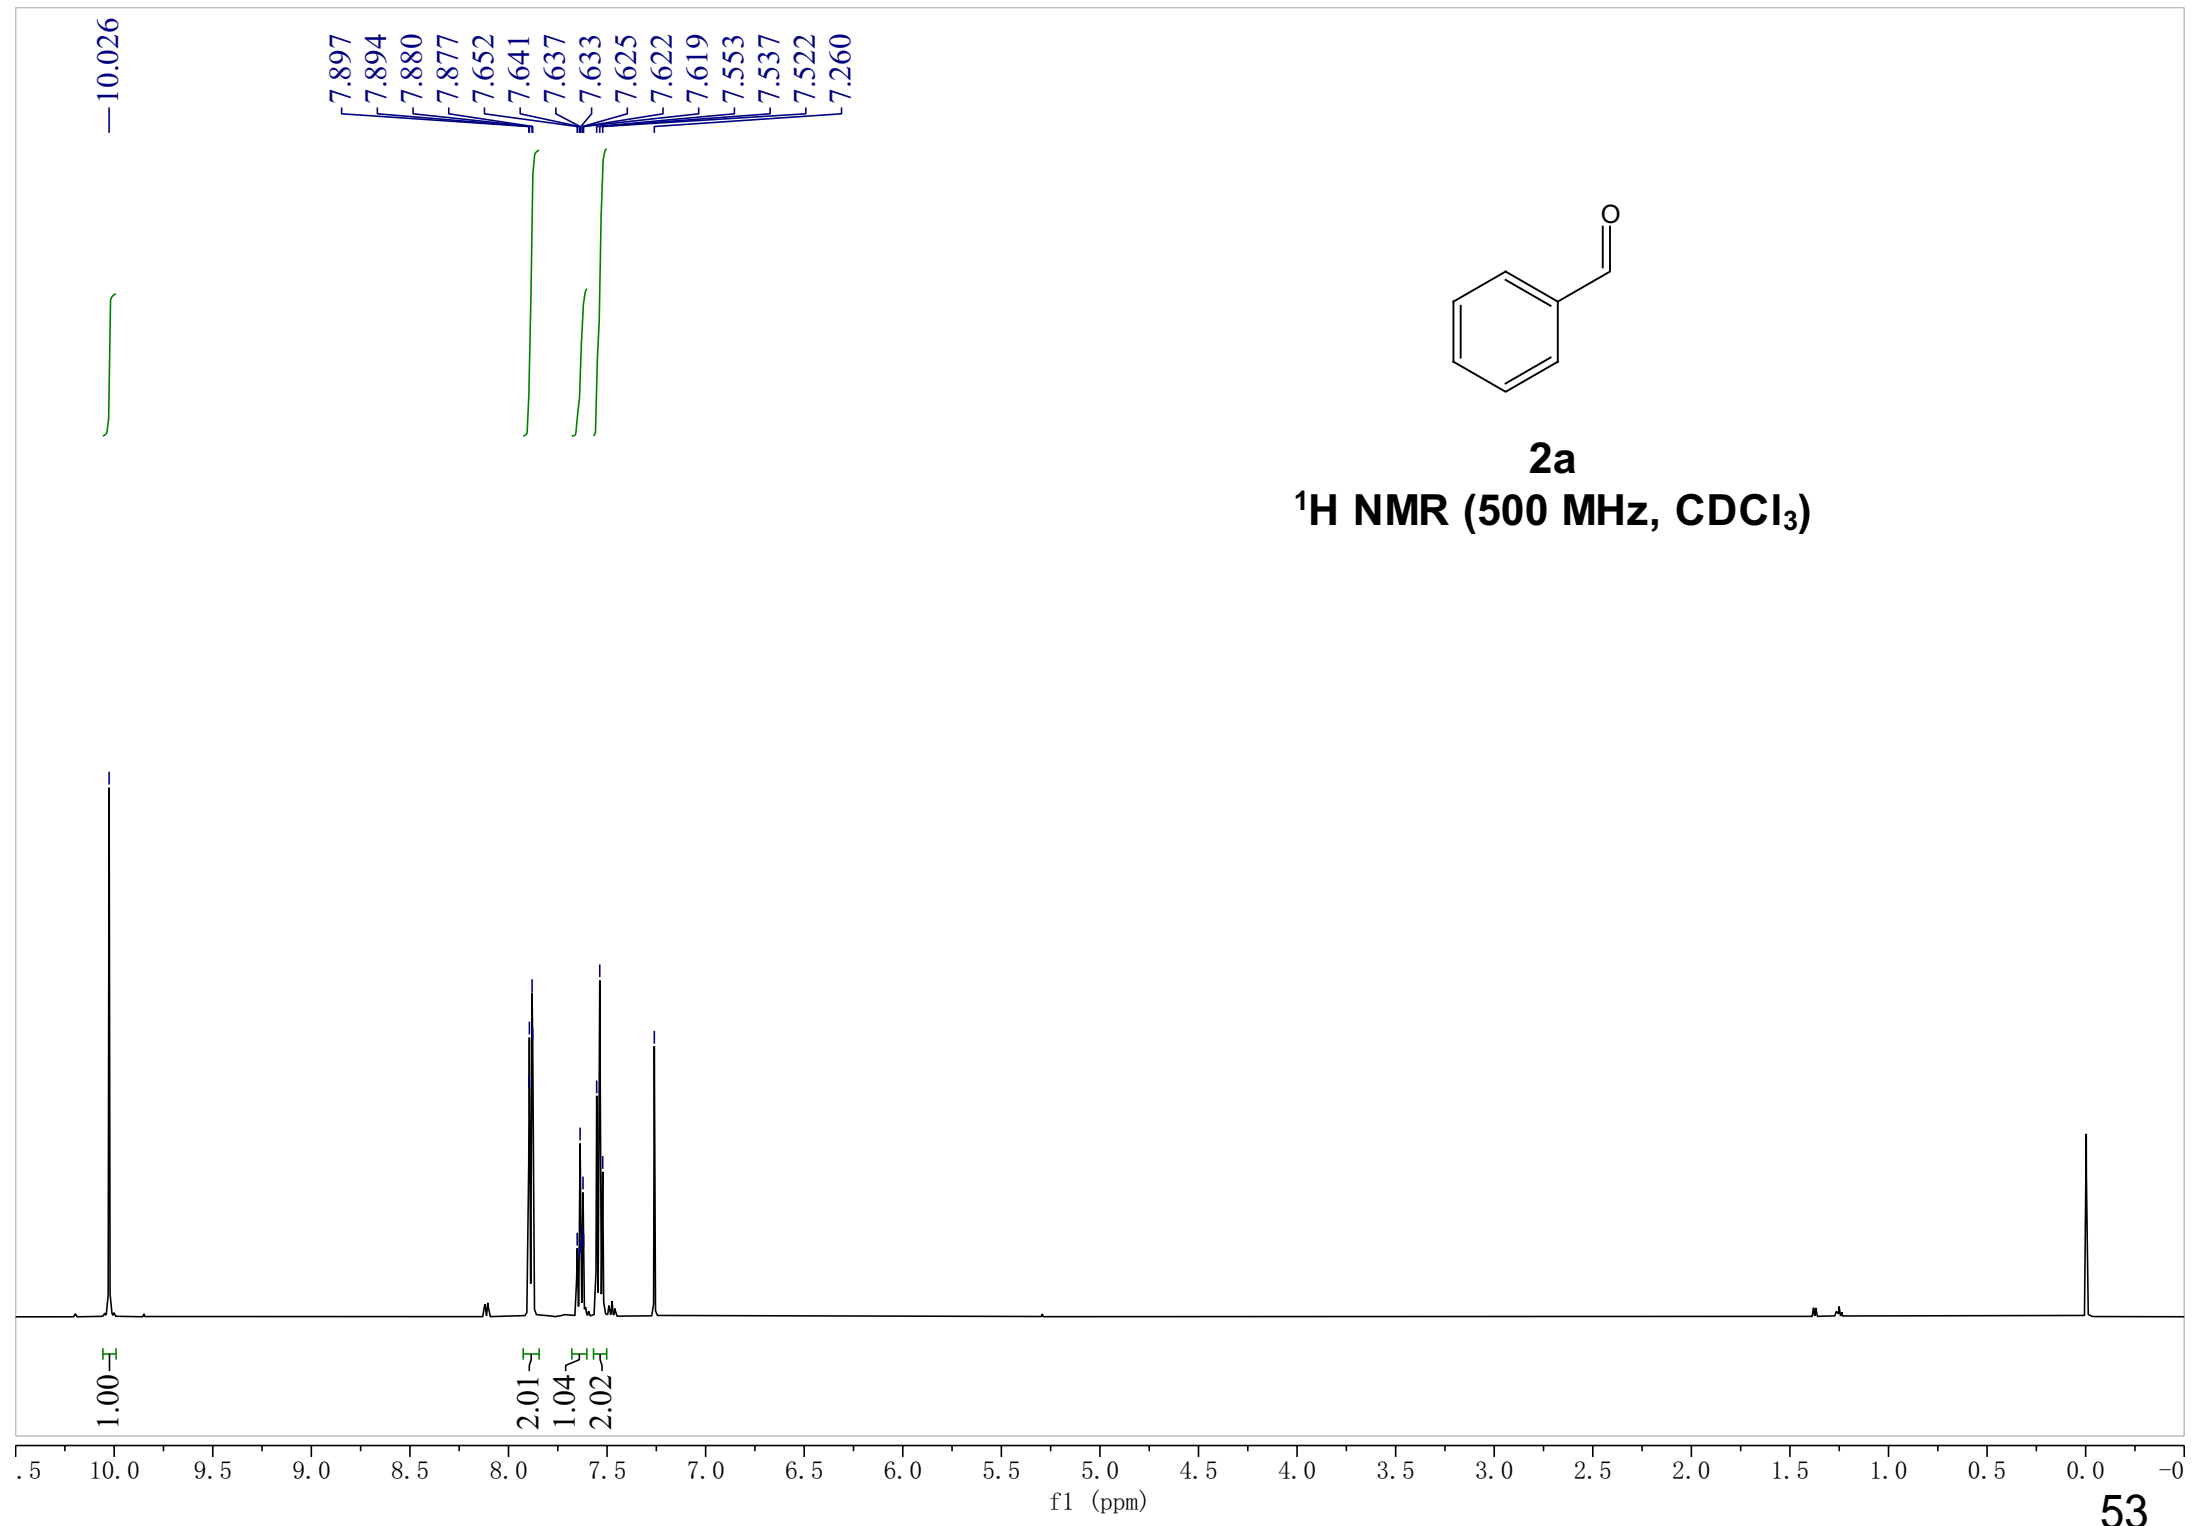

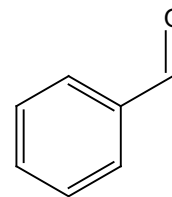

**2a**

**<sup>13</sup>C NMR (125 MHz, CDCl<sub>3</sub>)**

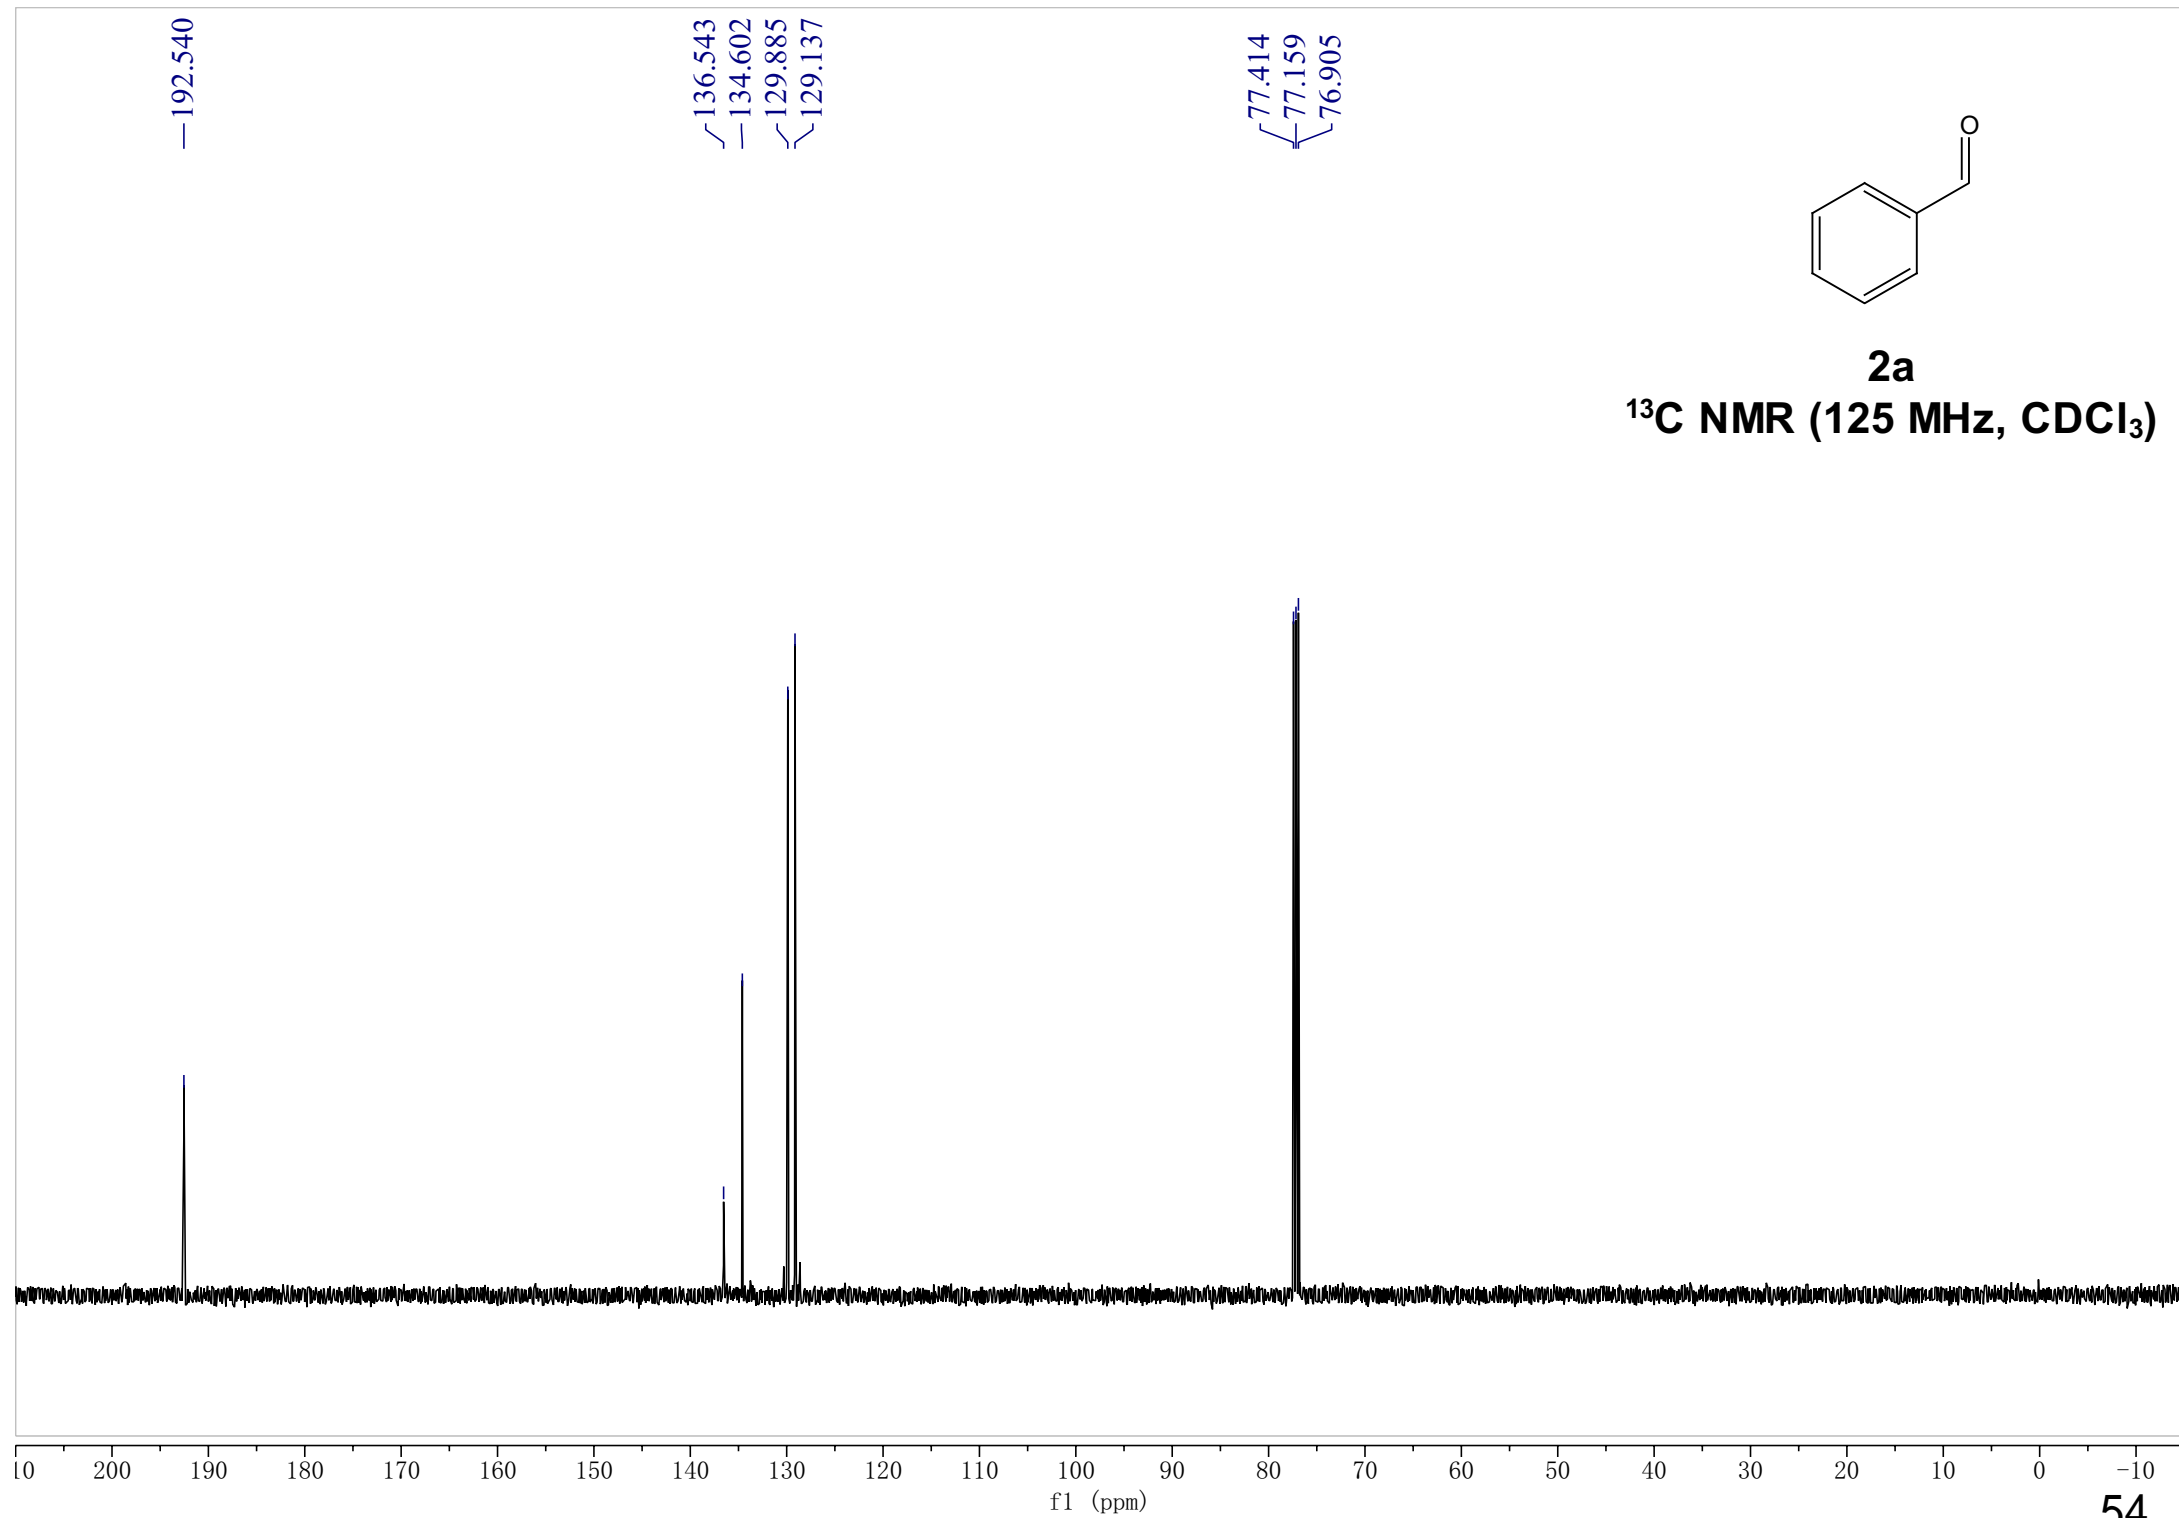

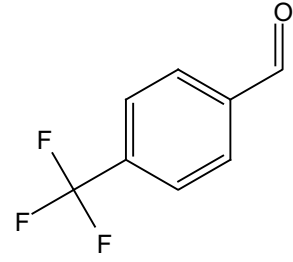

**2b**

**<sup>1</sup>H NMR (500 MHz, CDCl<sub>3</sub>)**

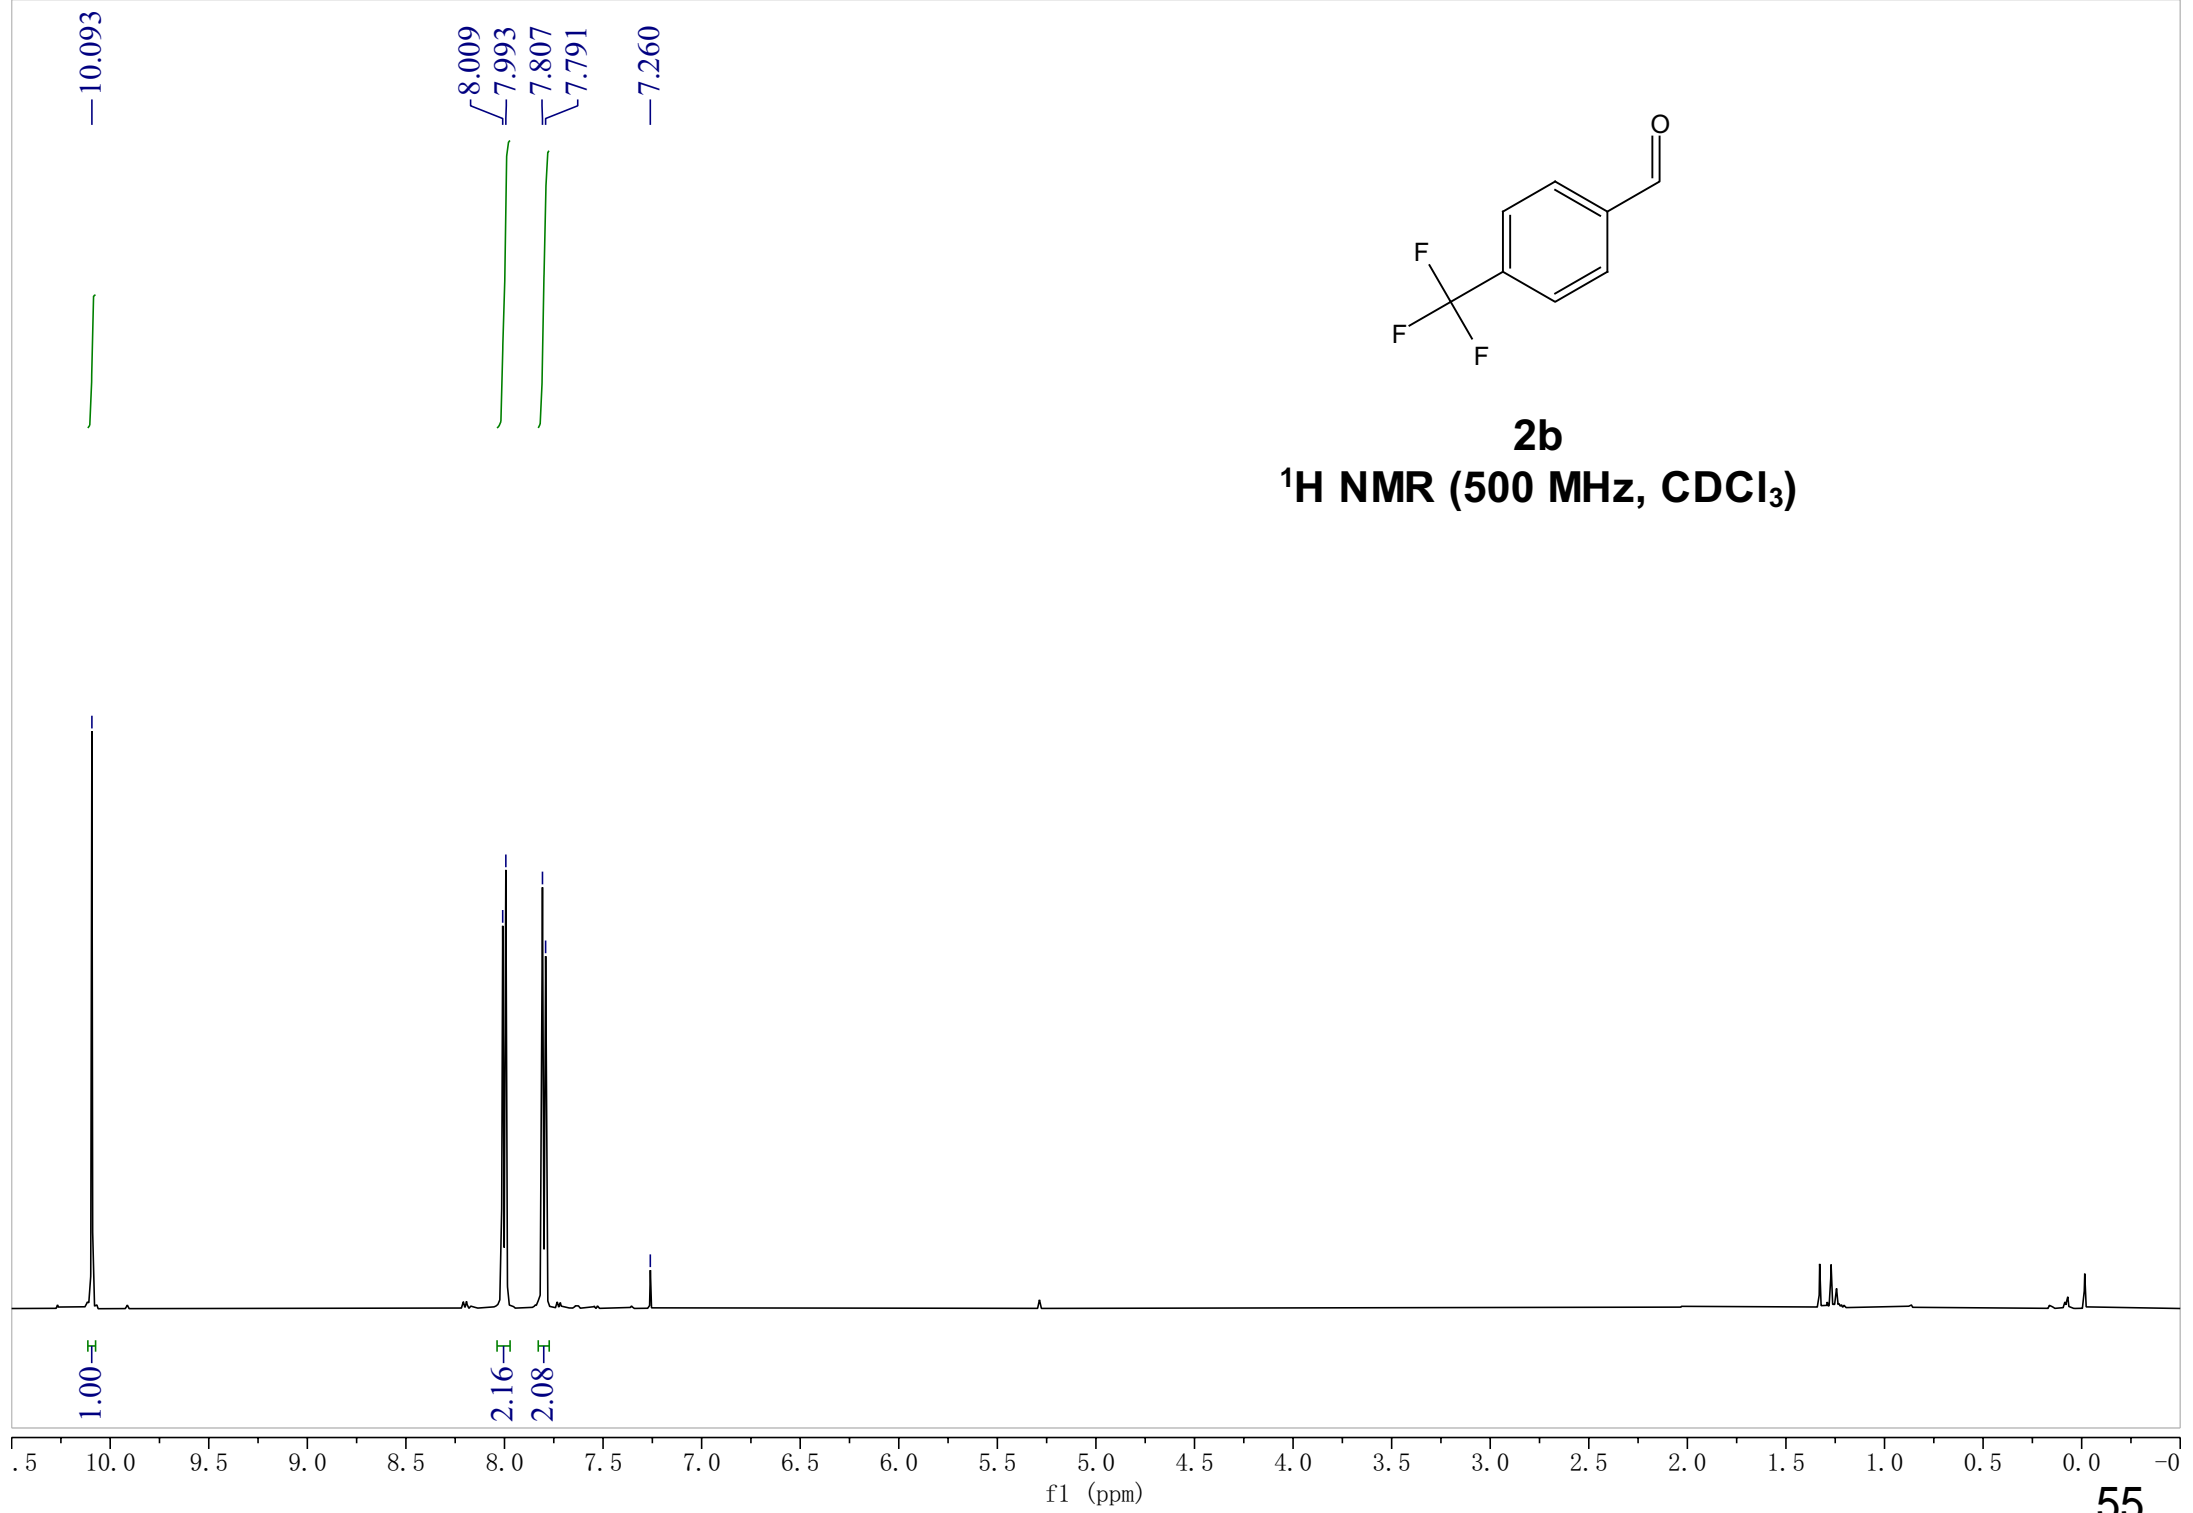



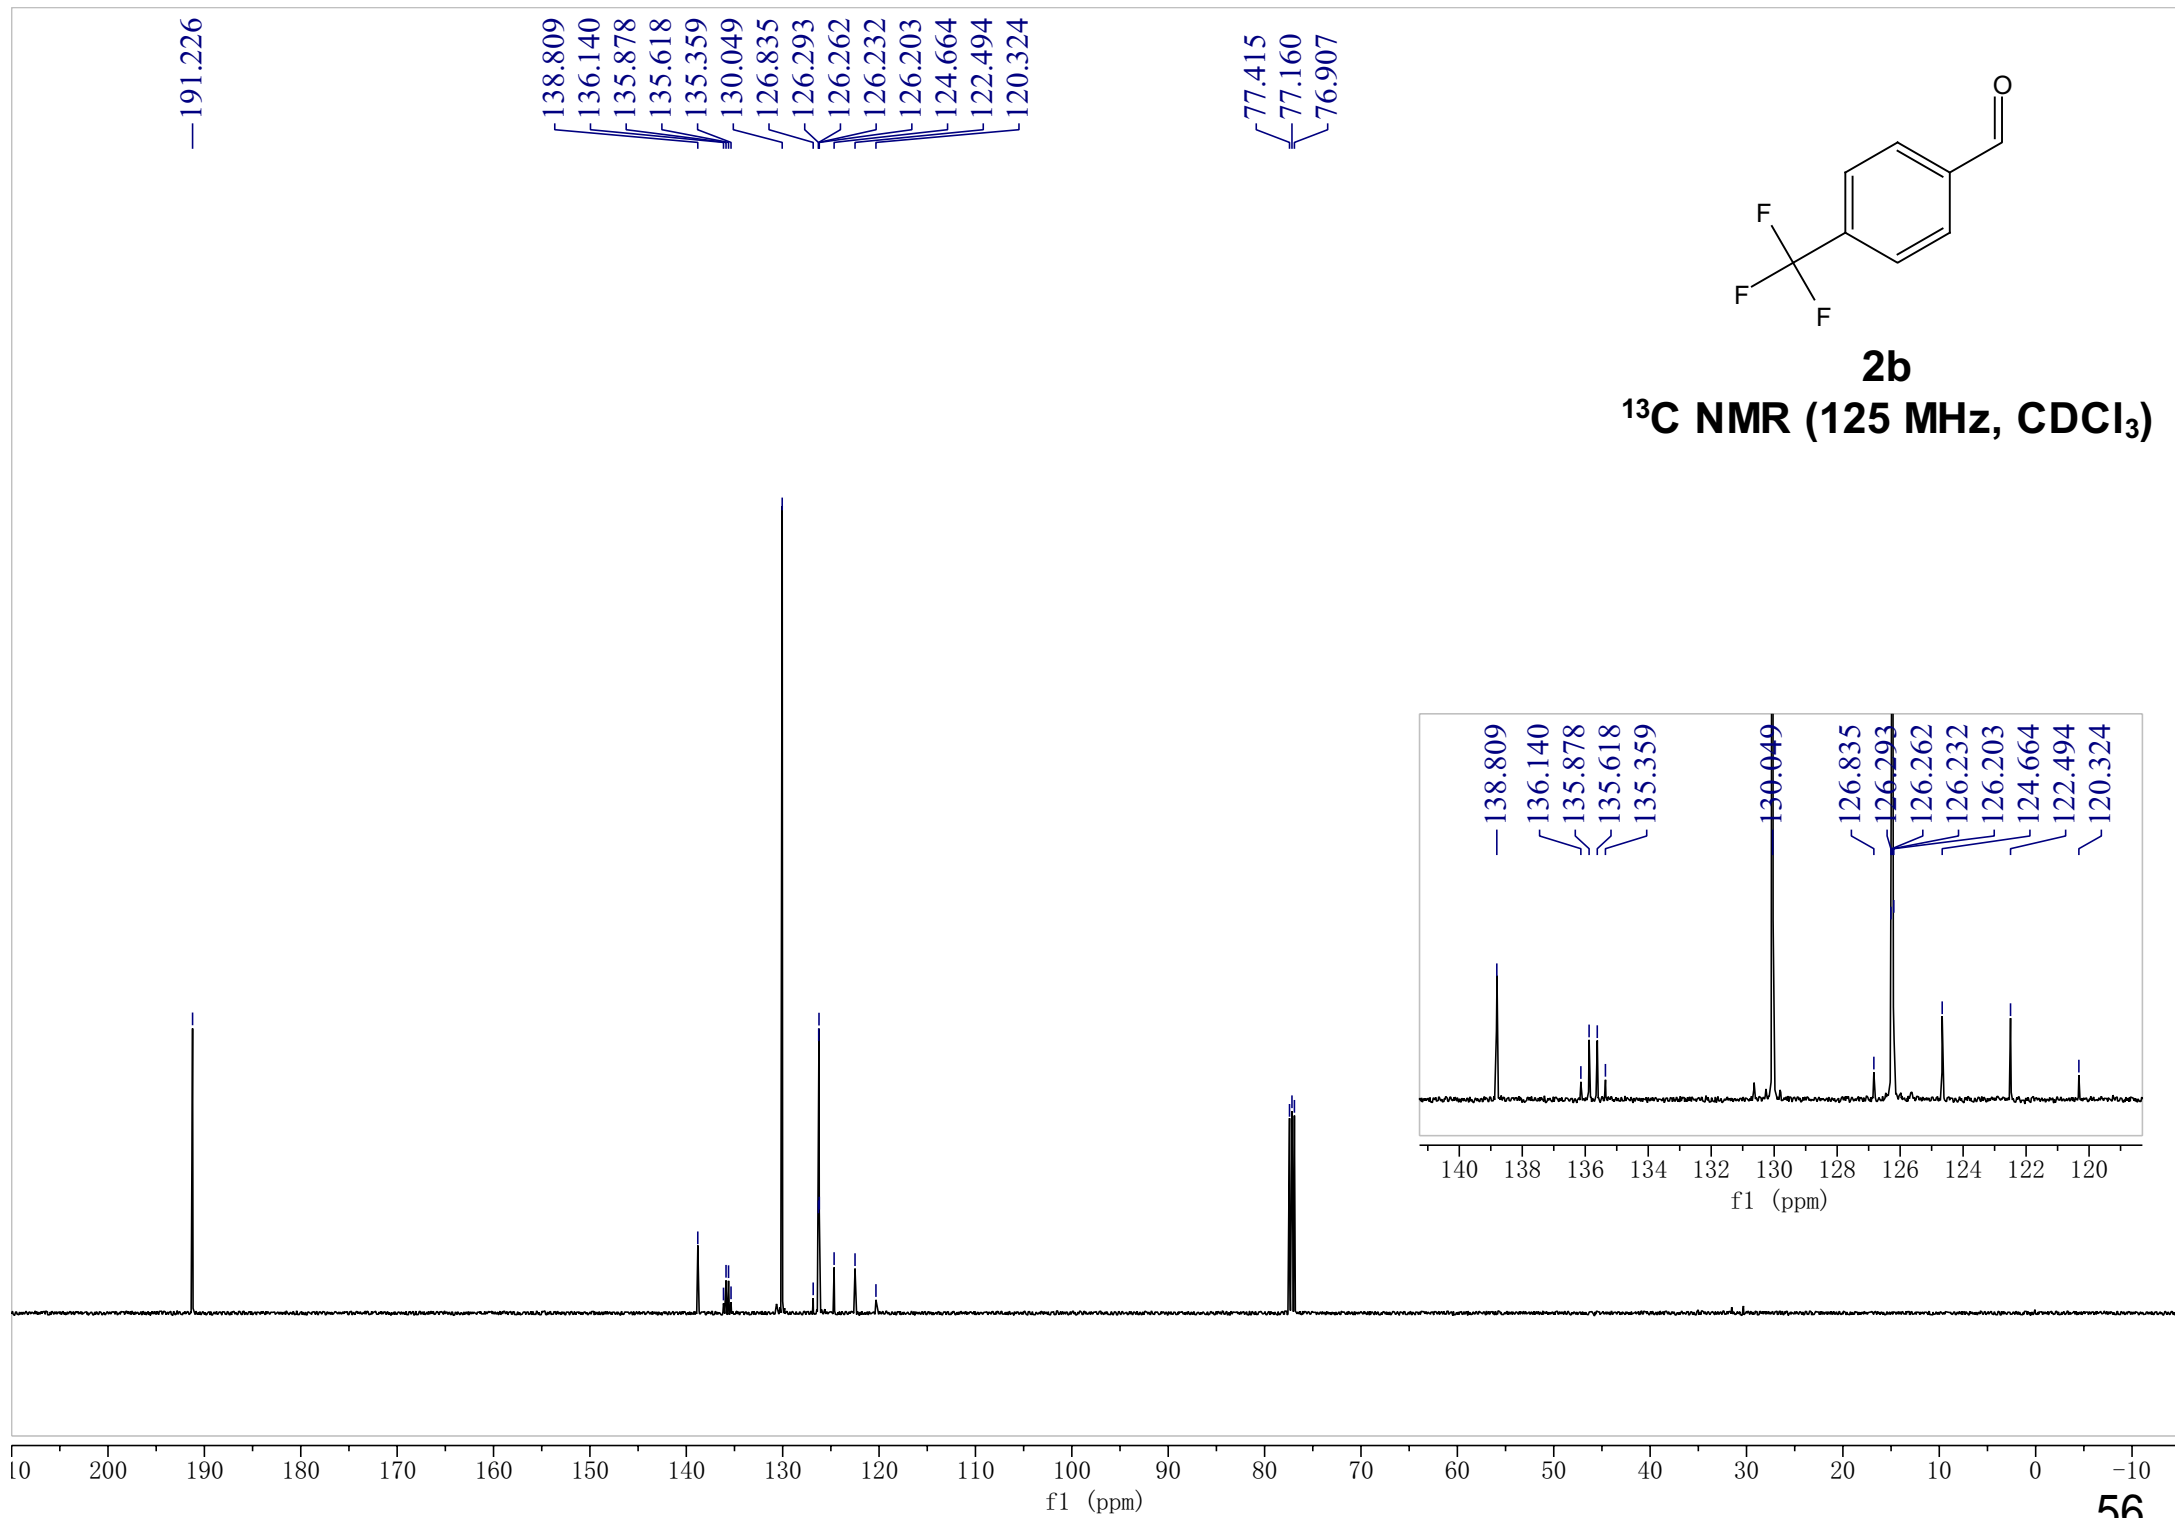

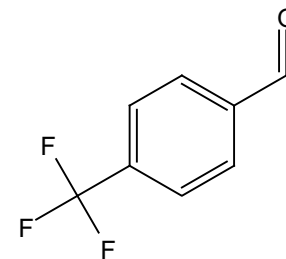

**2b**

**$^{19}\text{F}$  NMR (470 MHz,  $\text{CDCl}_3$ )**

— -63.261

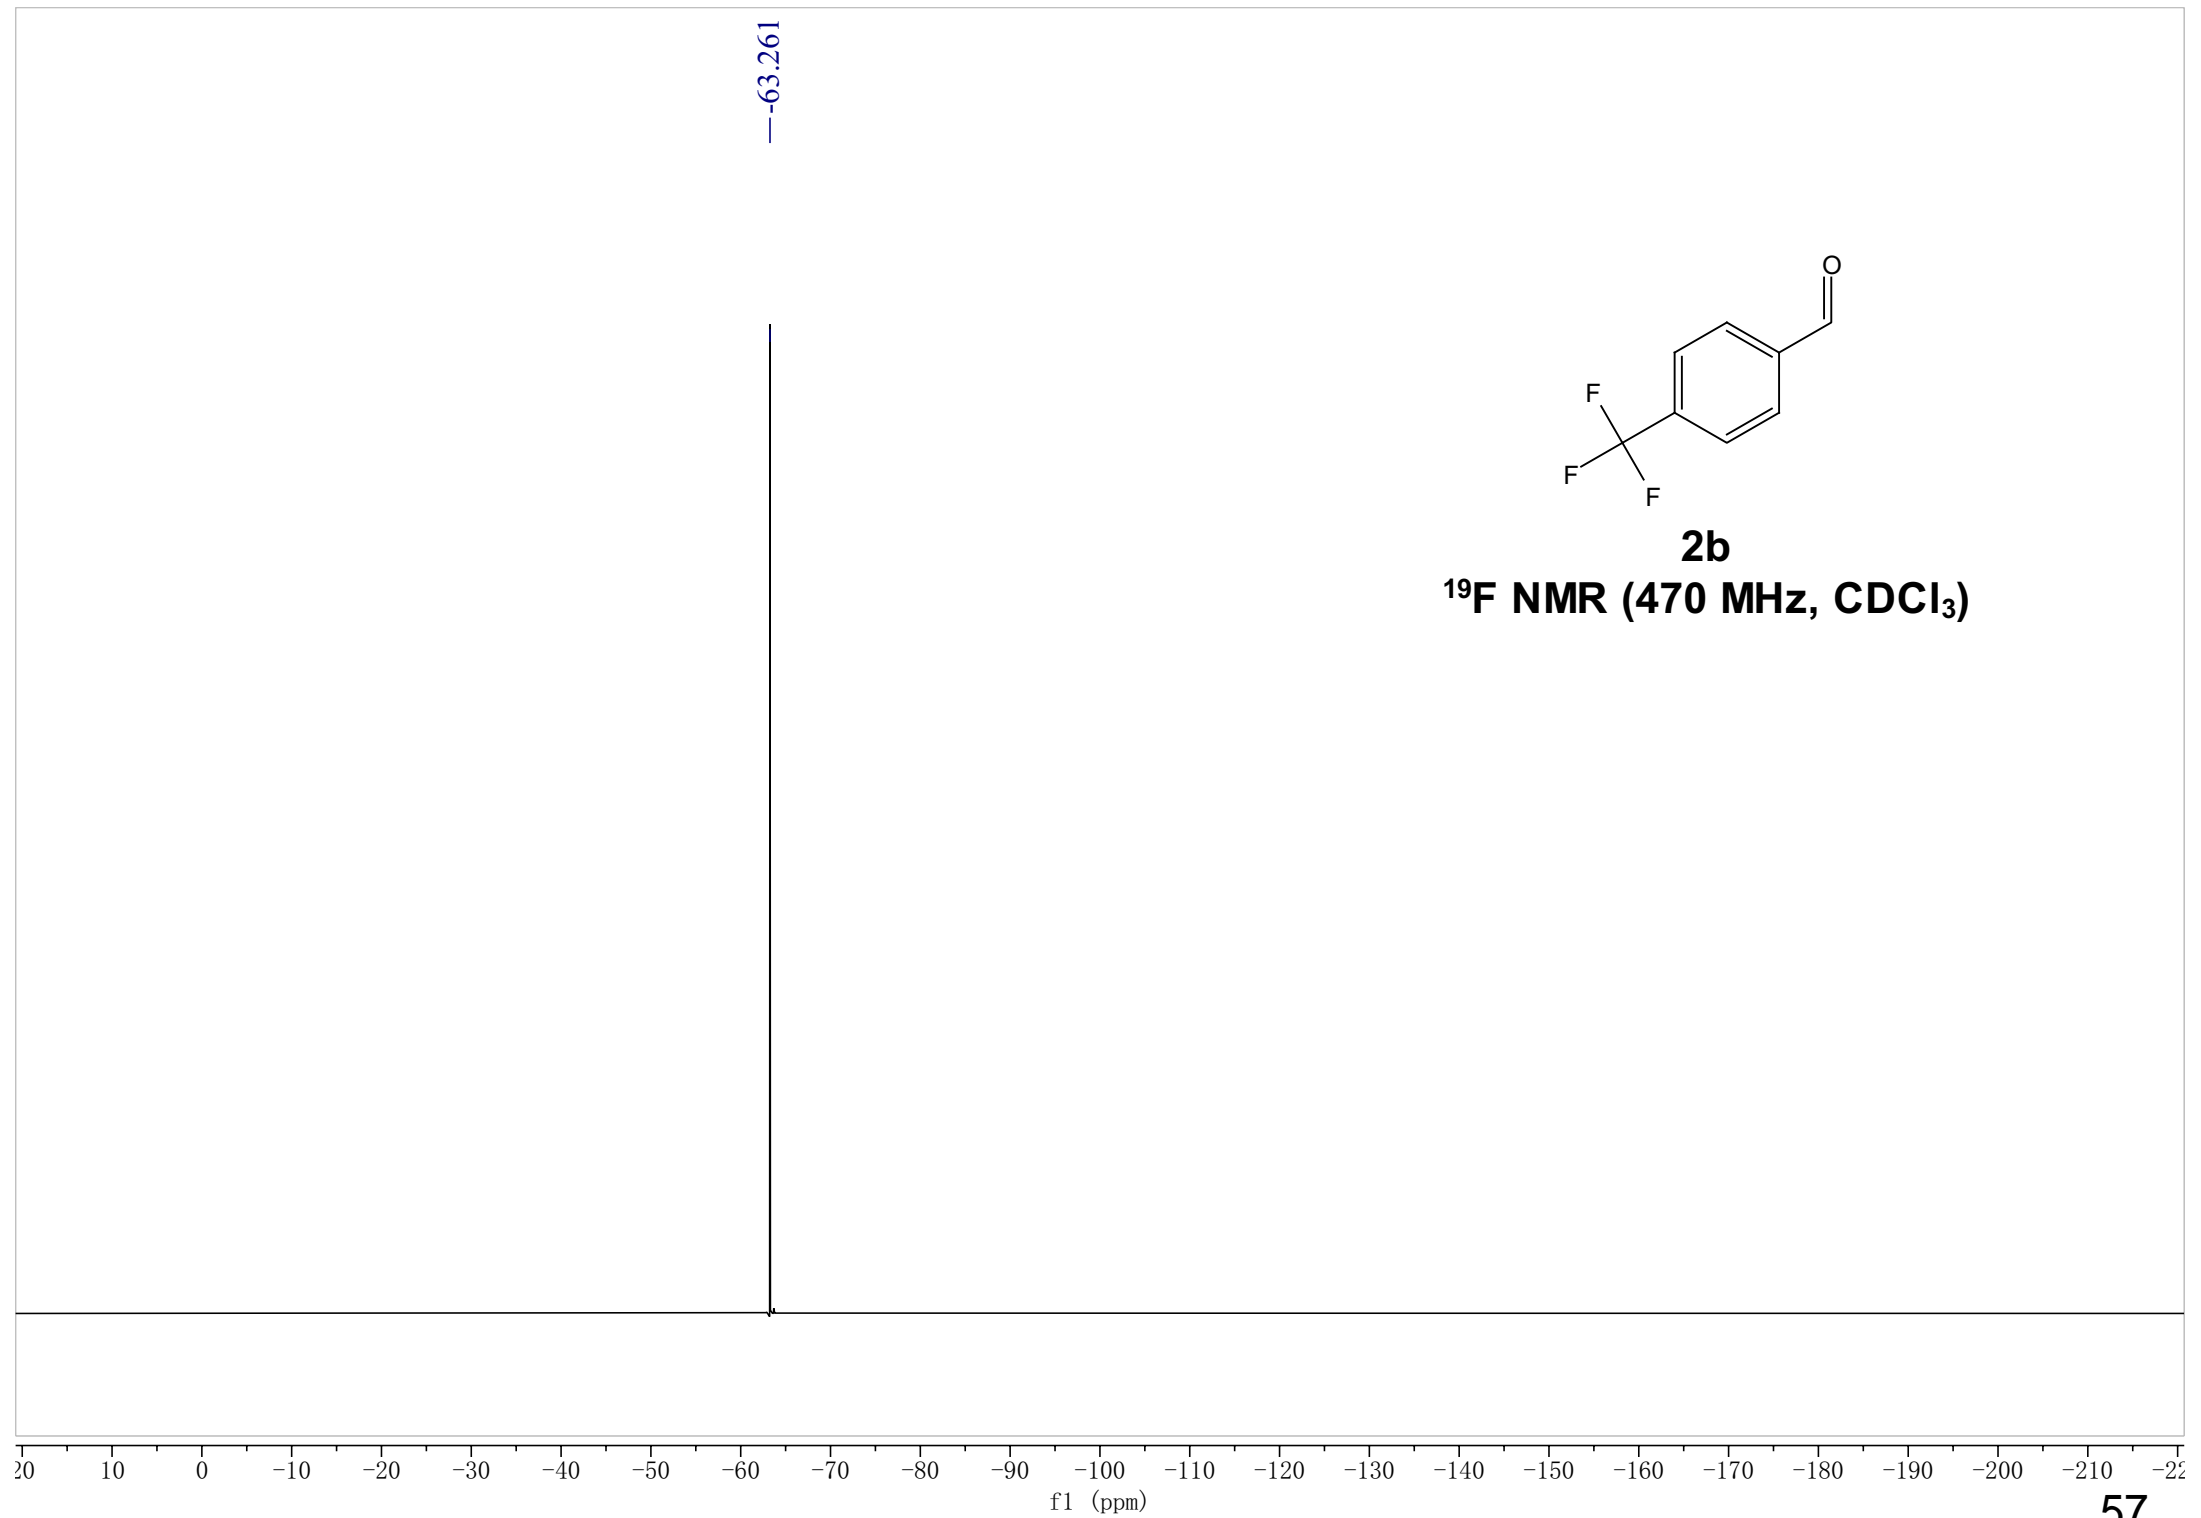

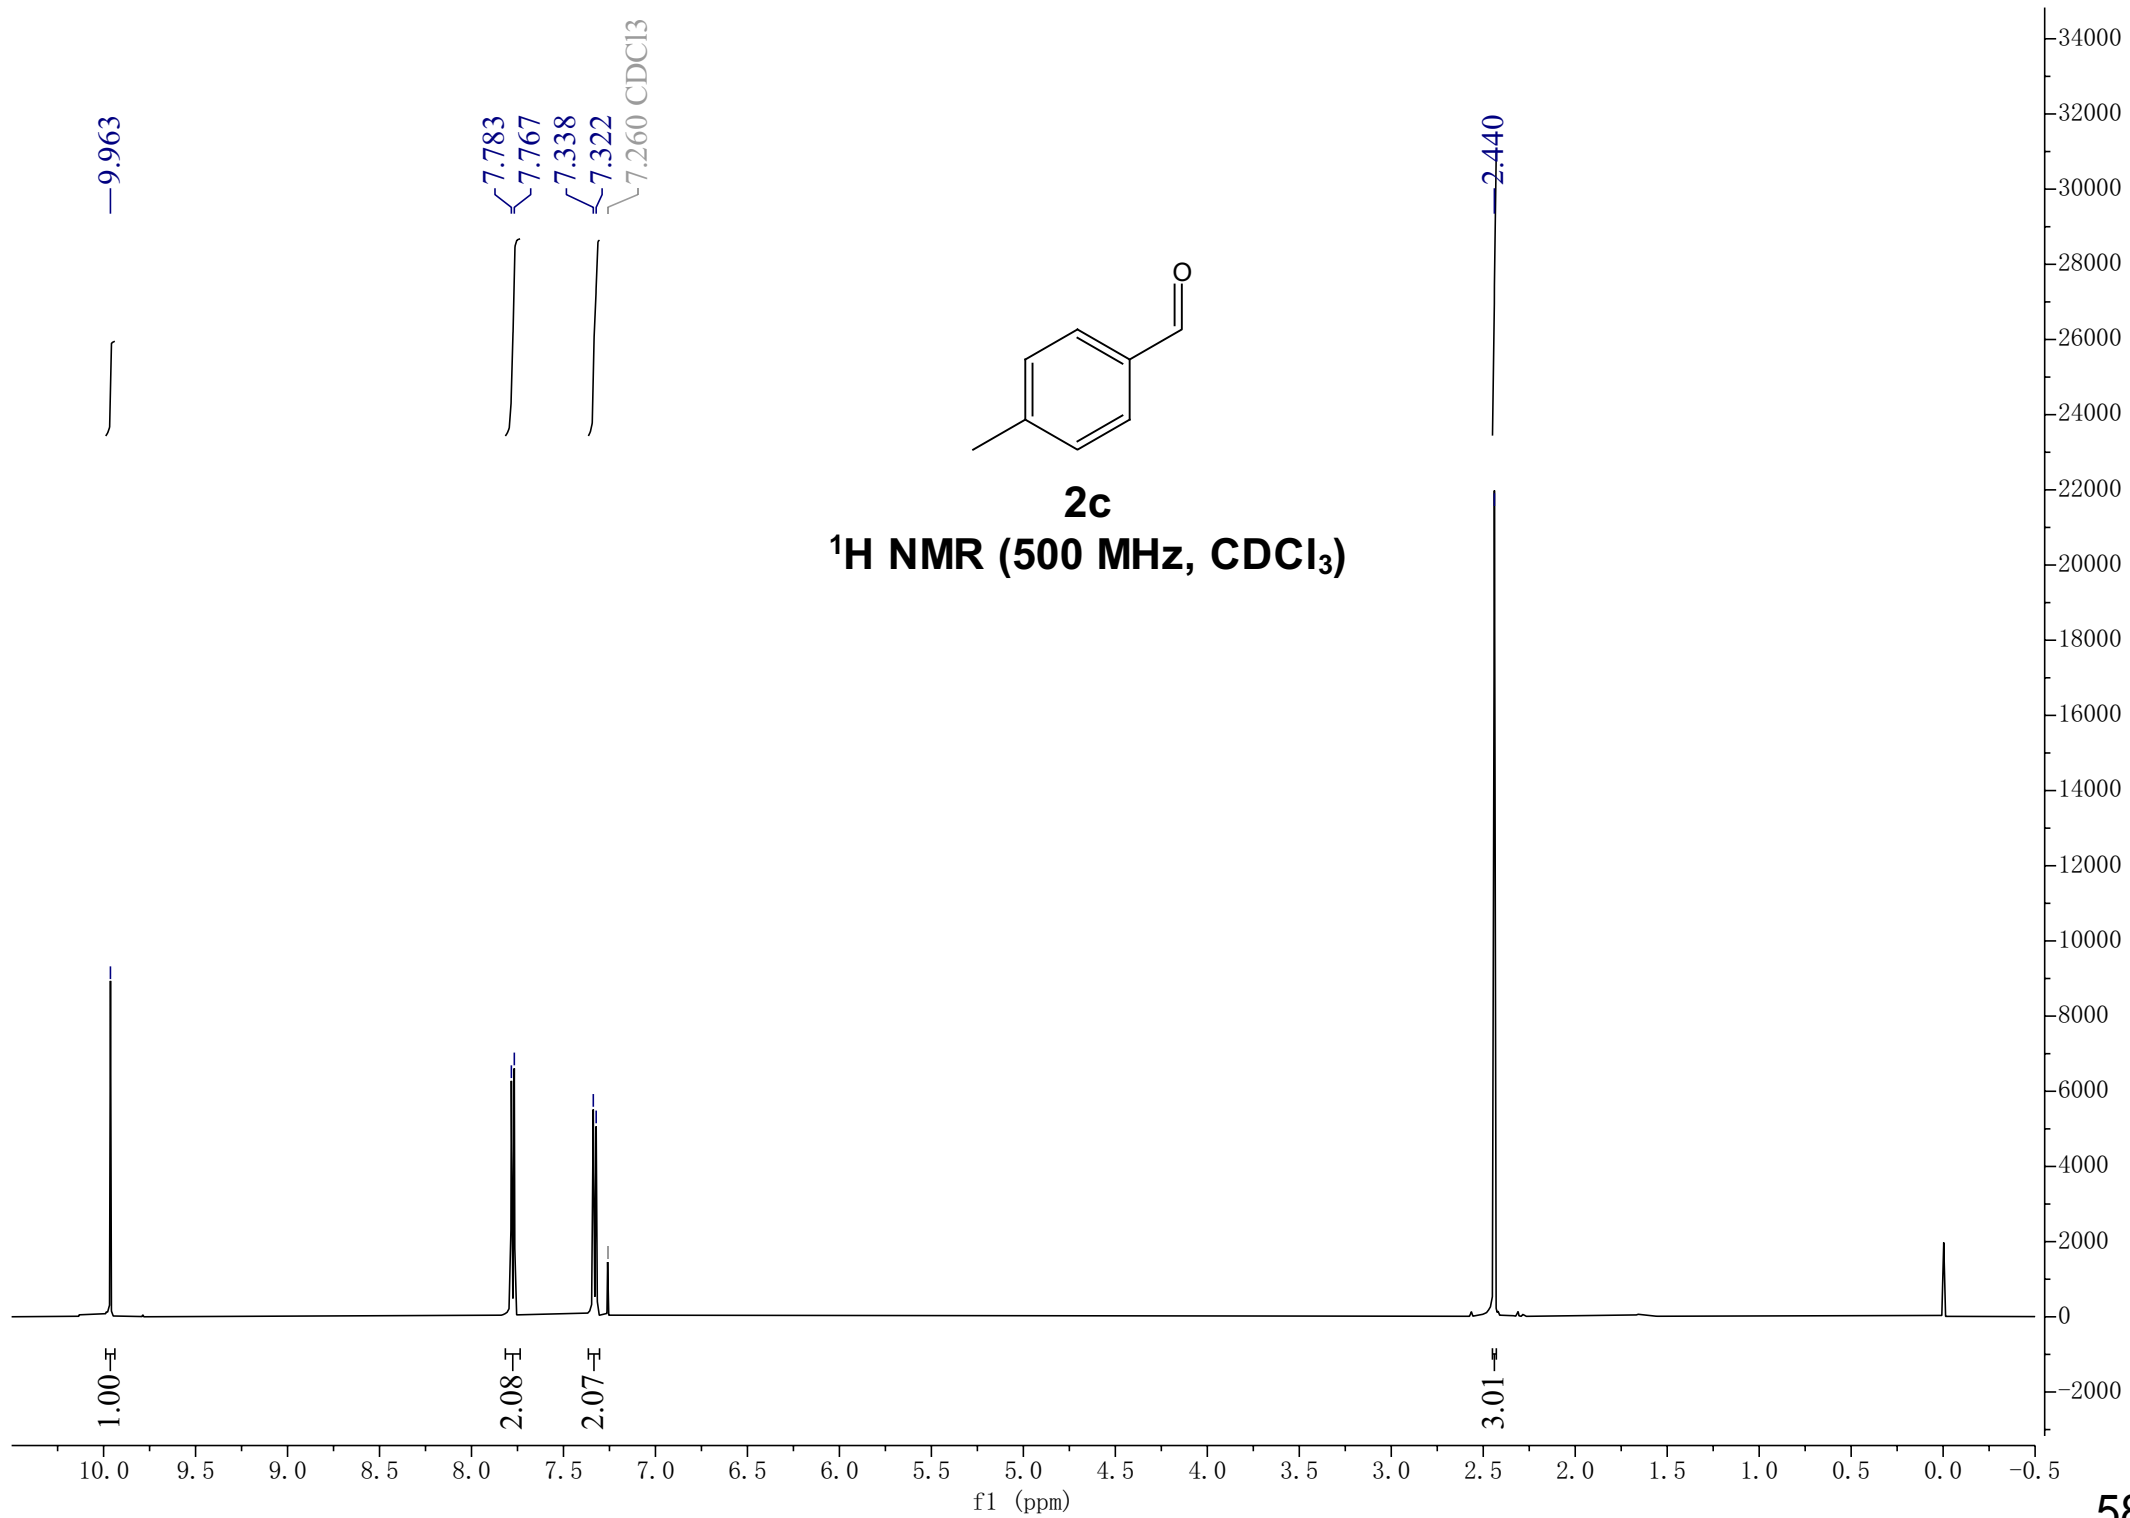

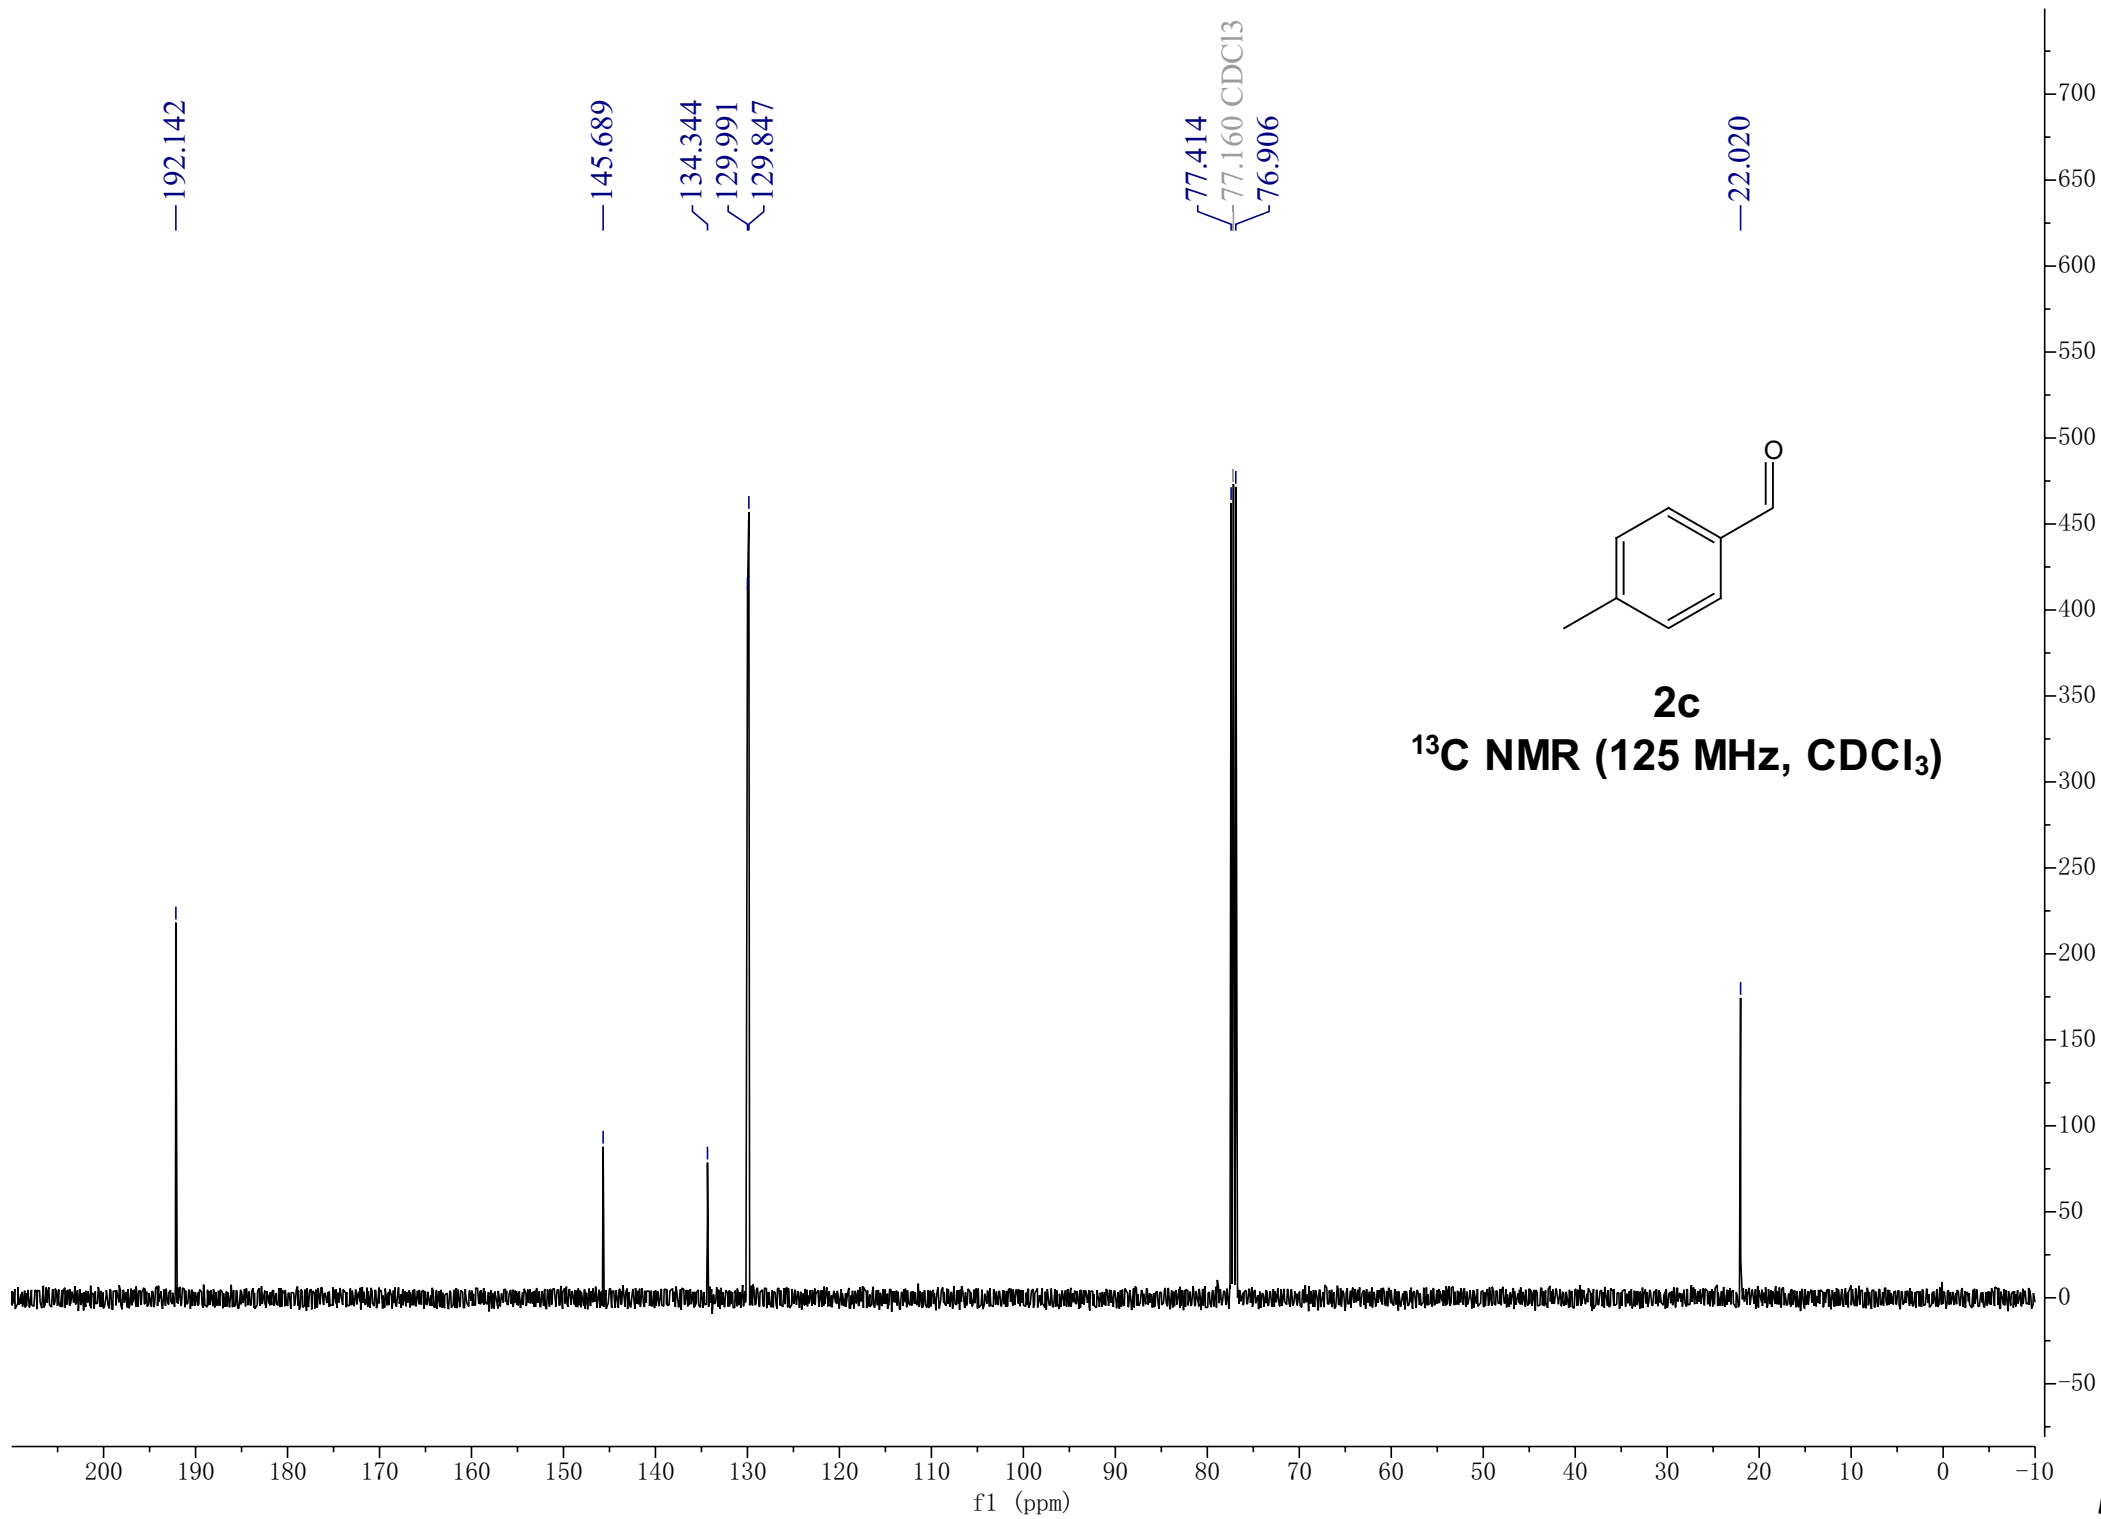

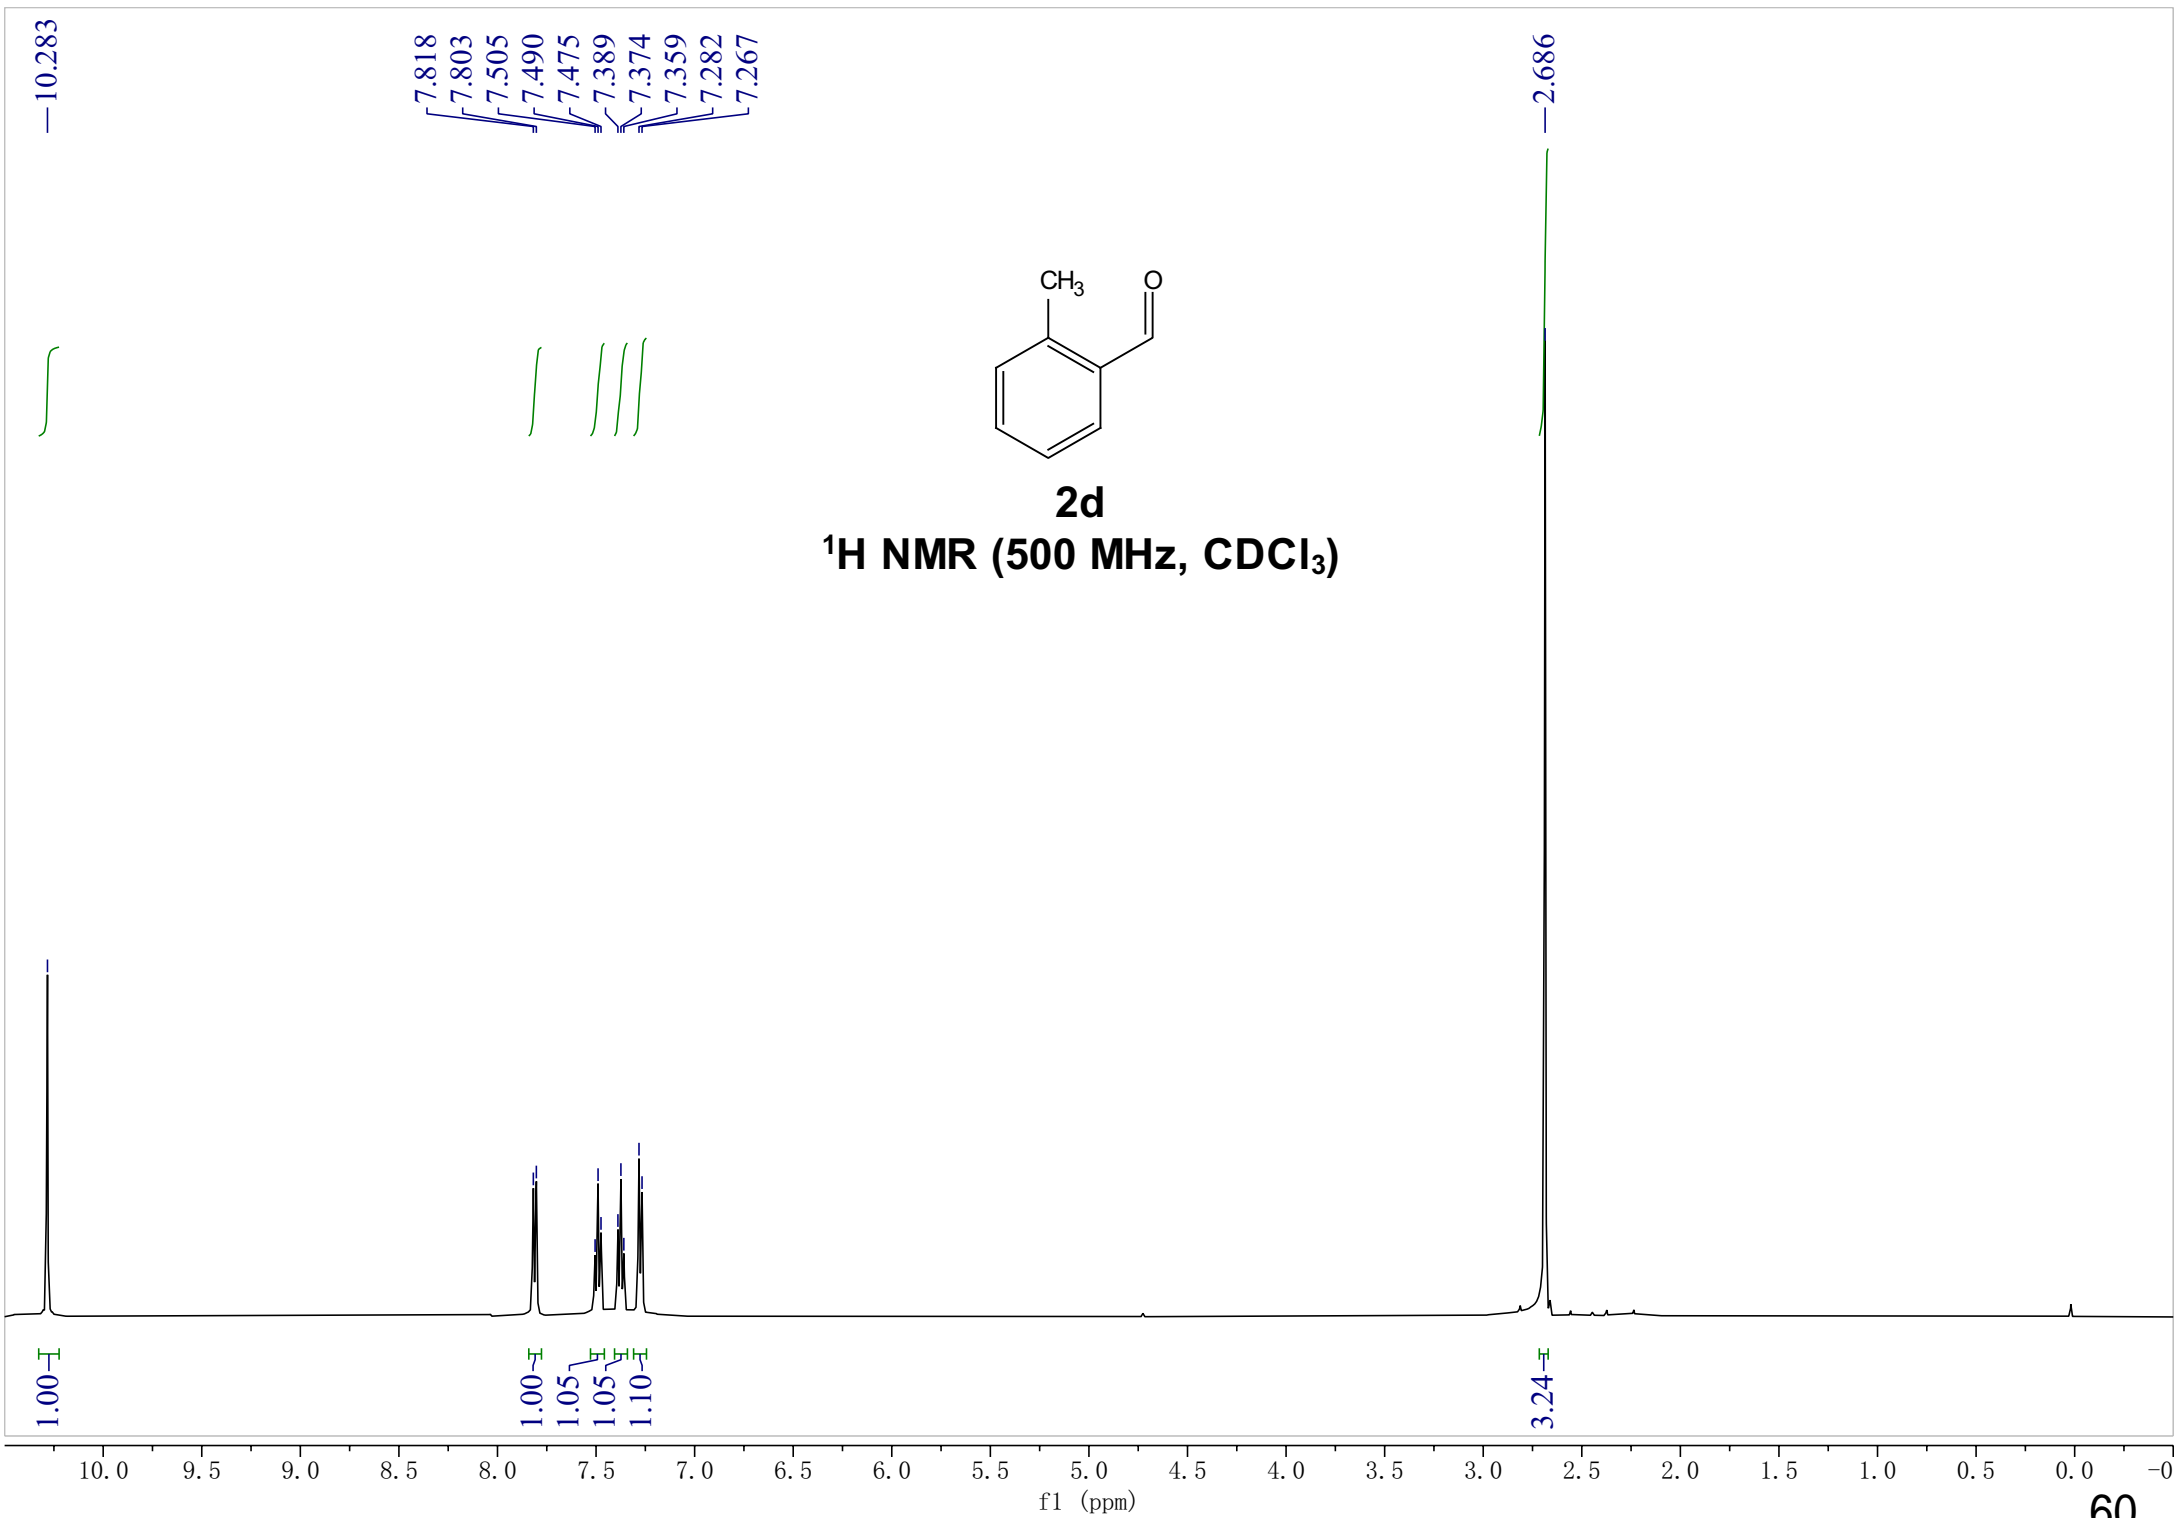

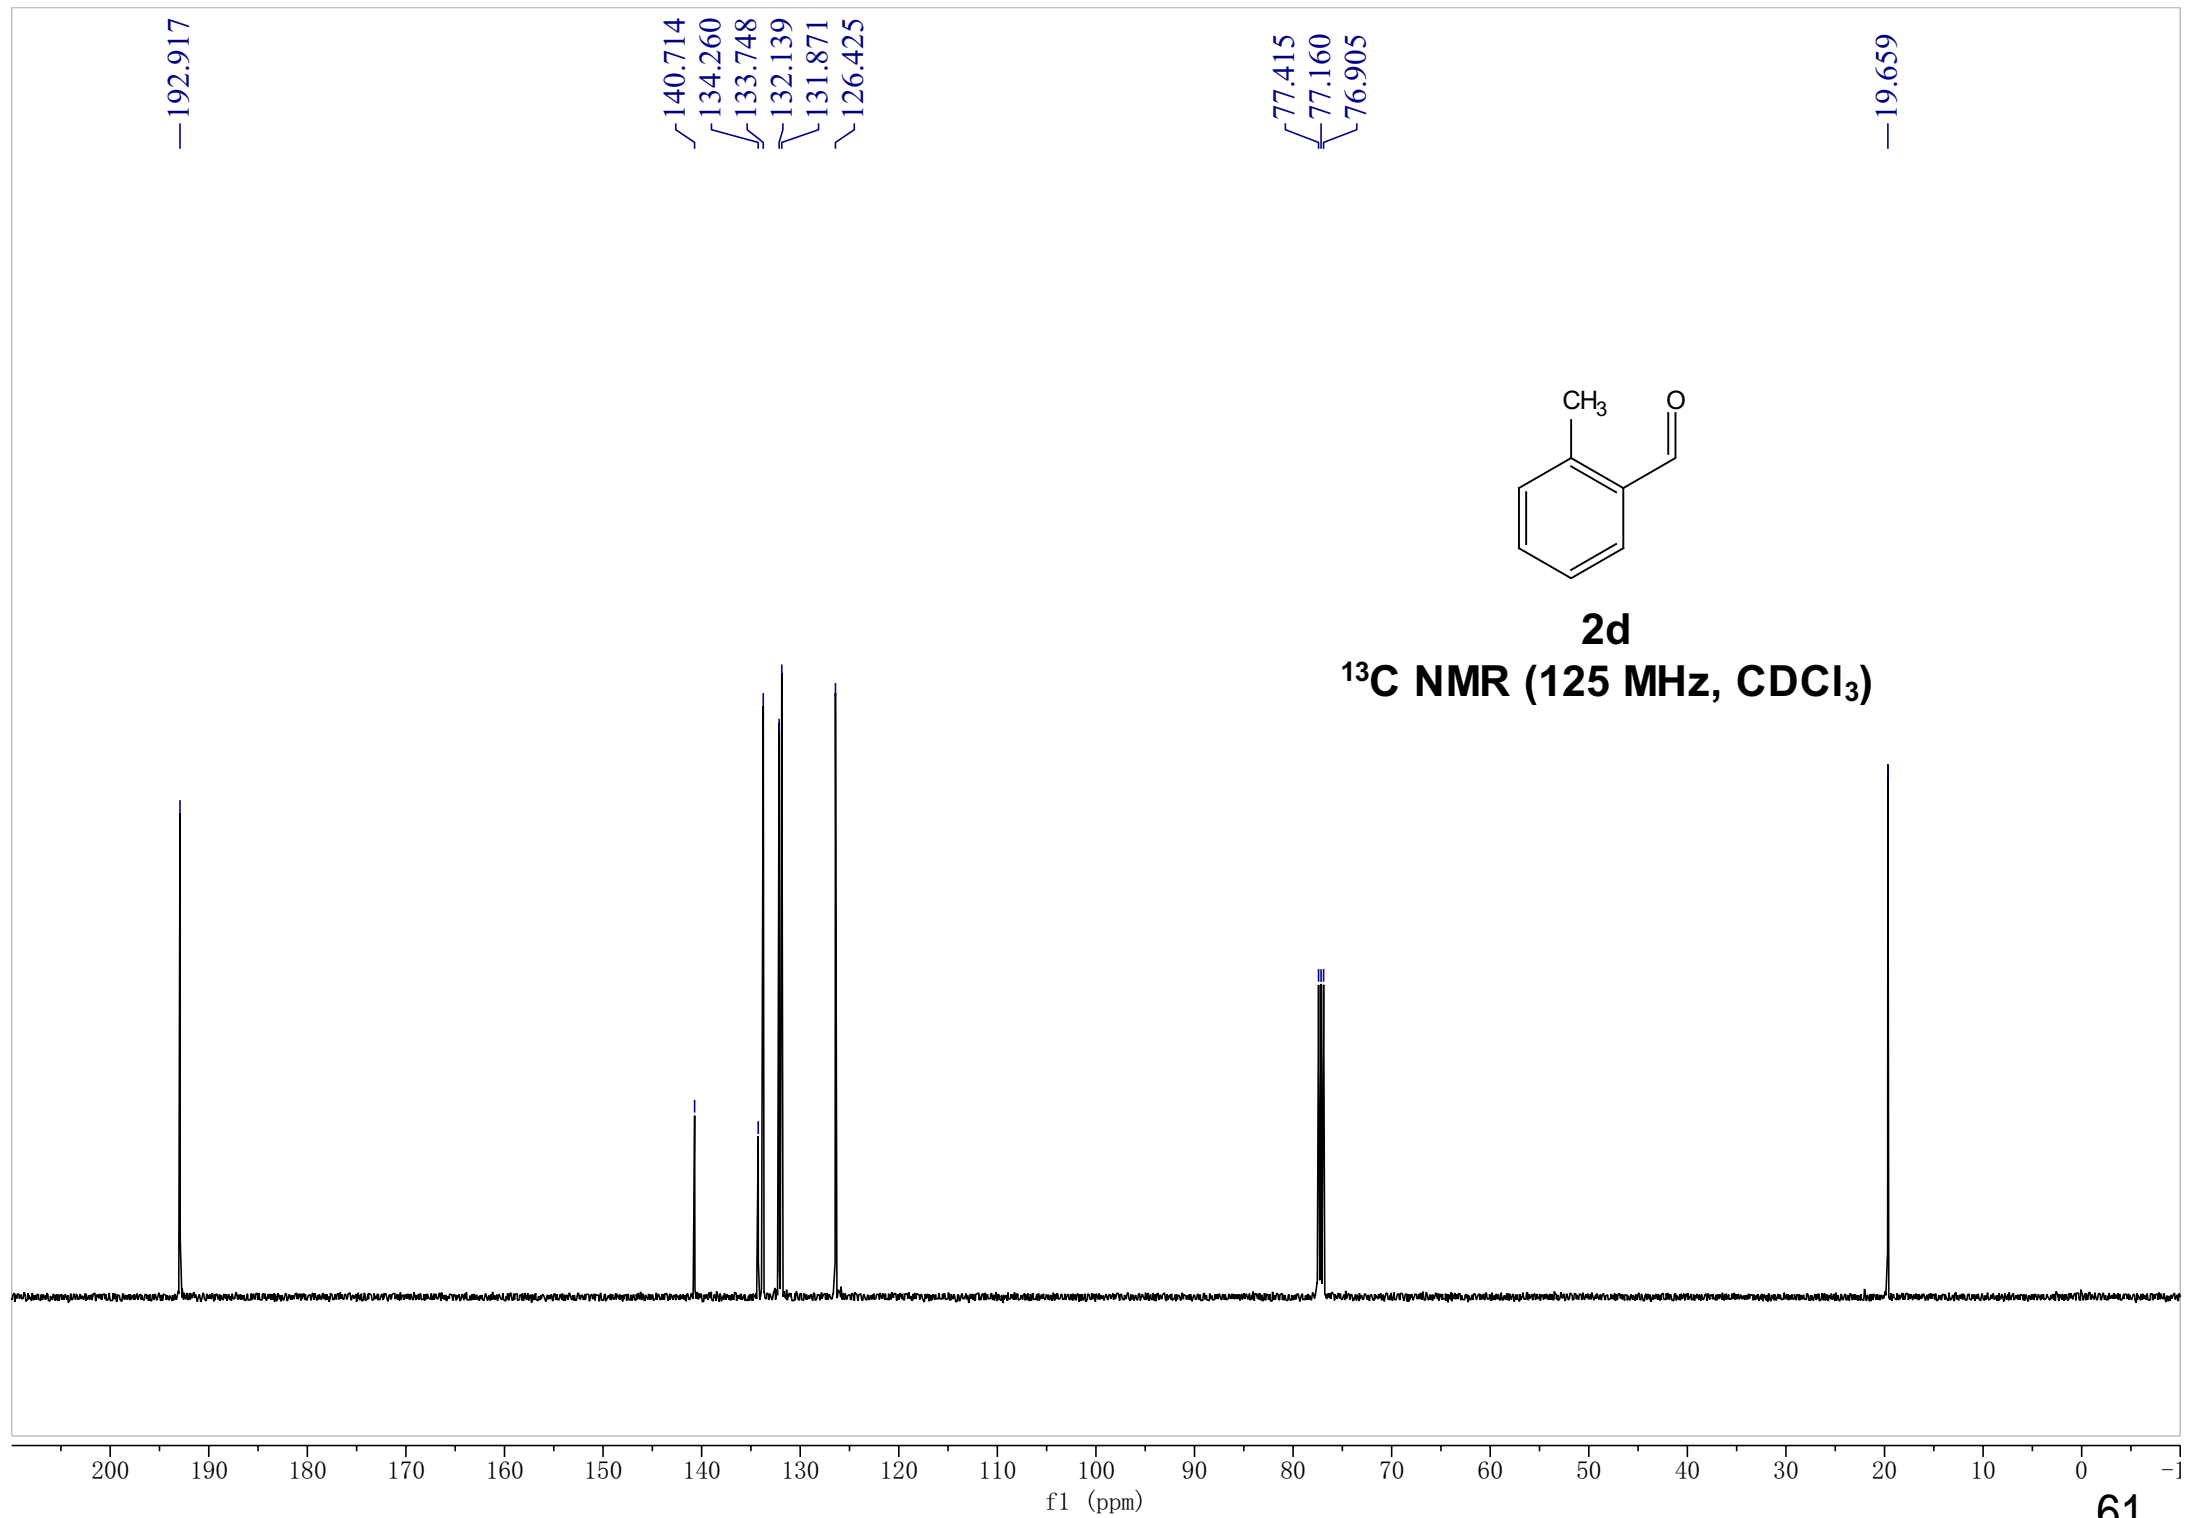

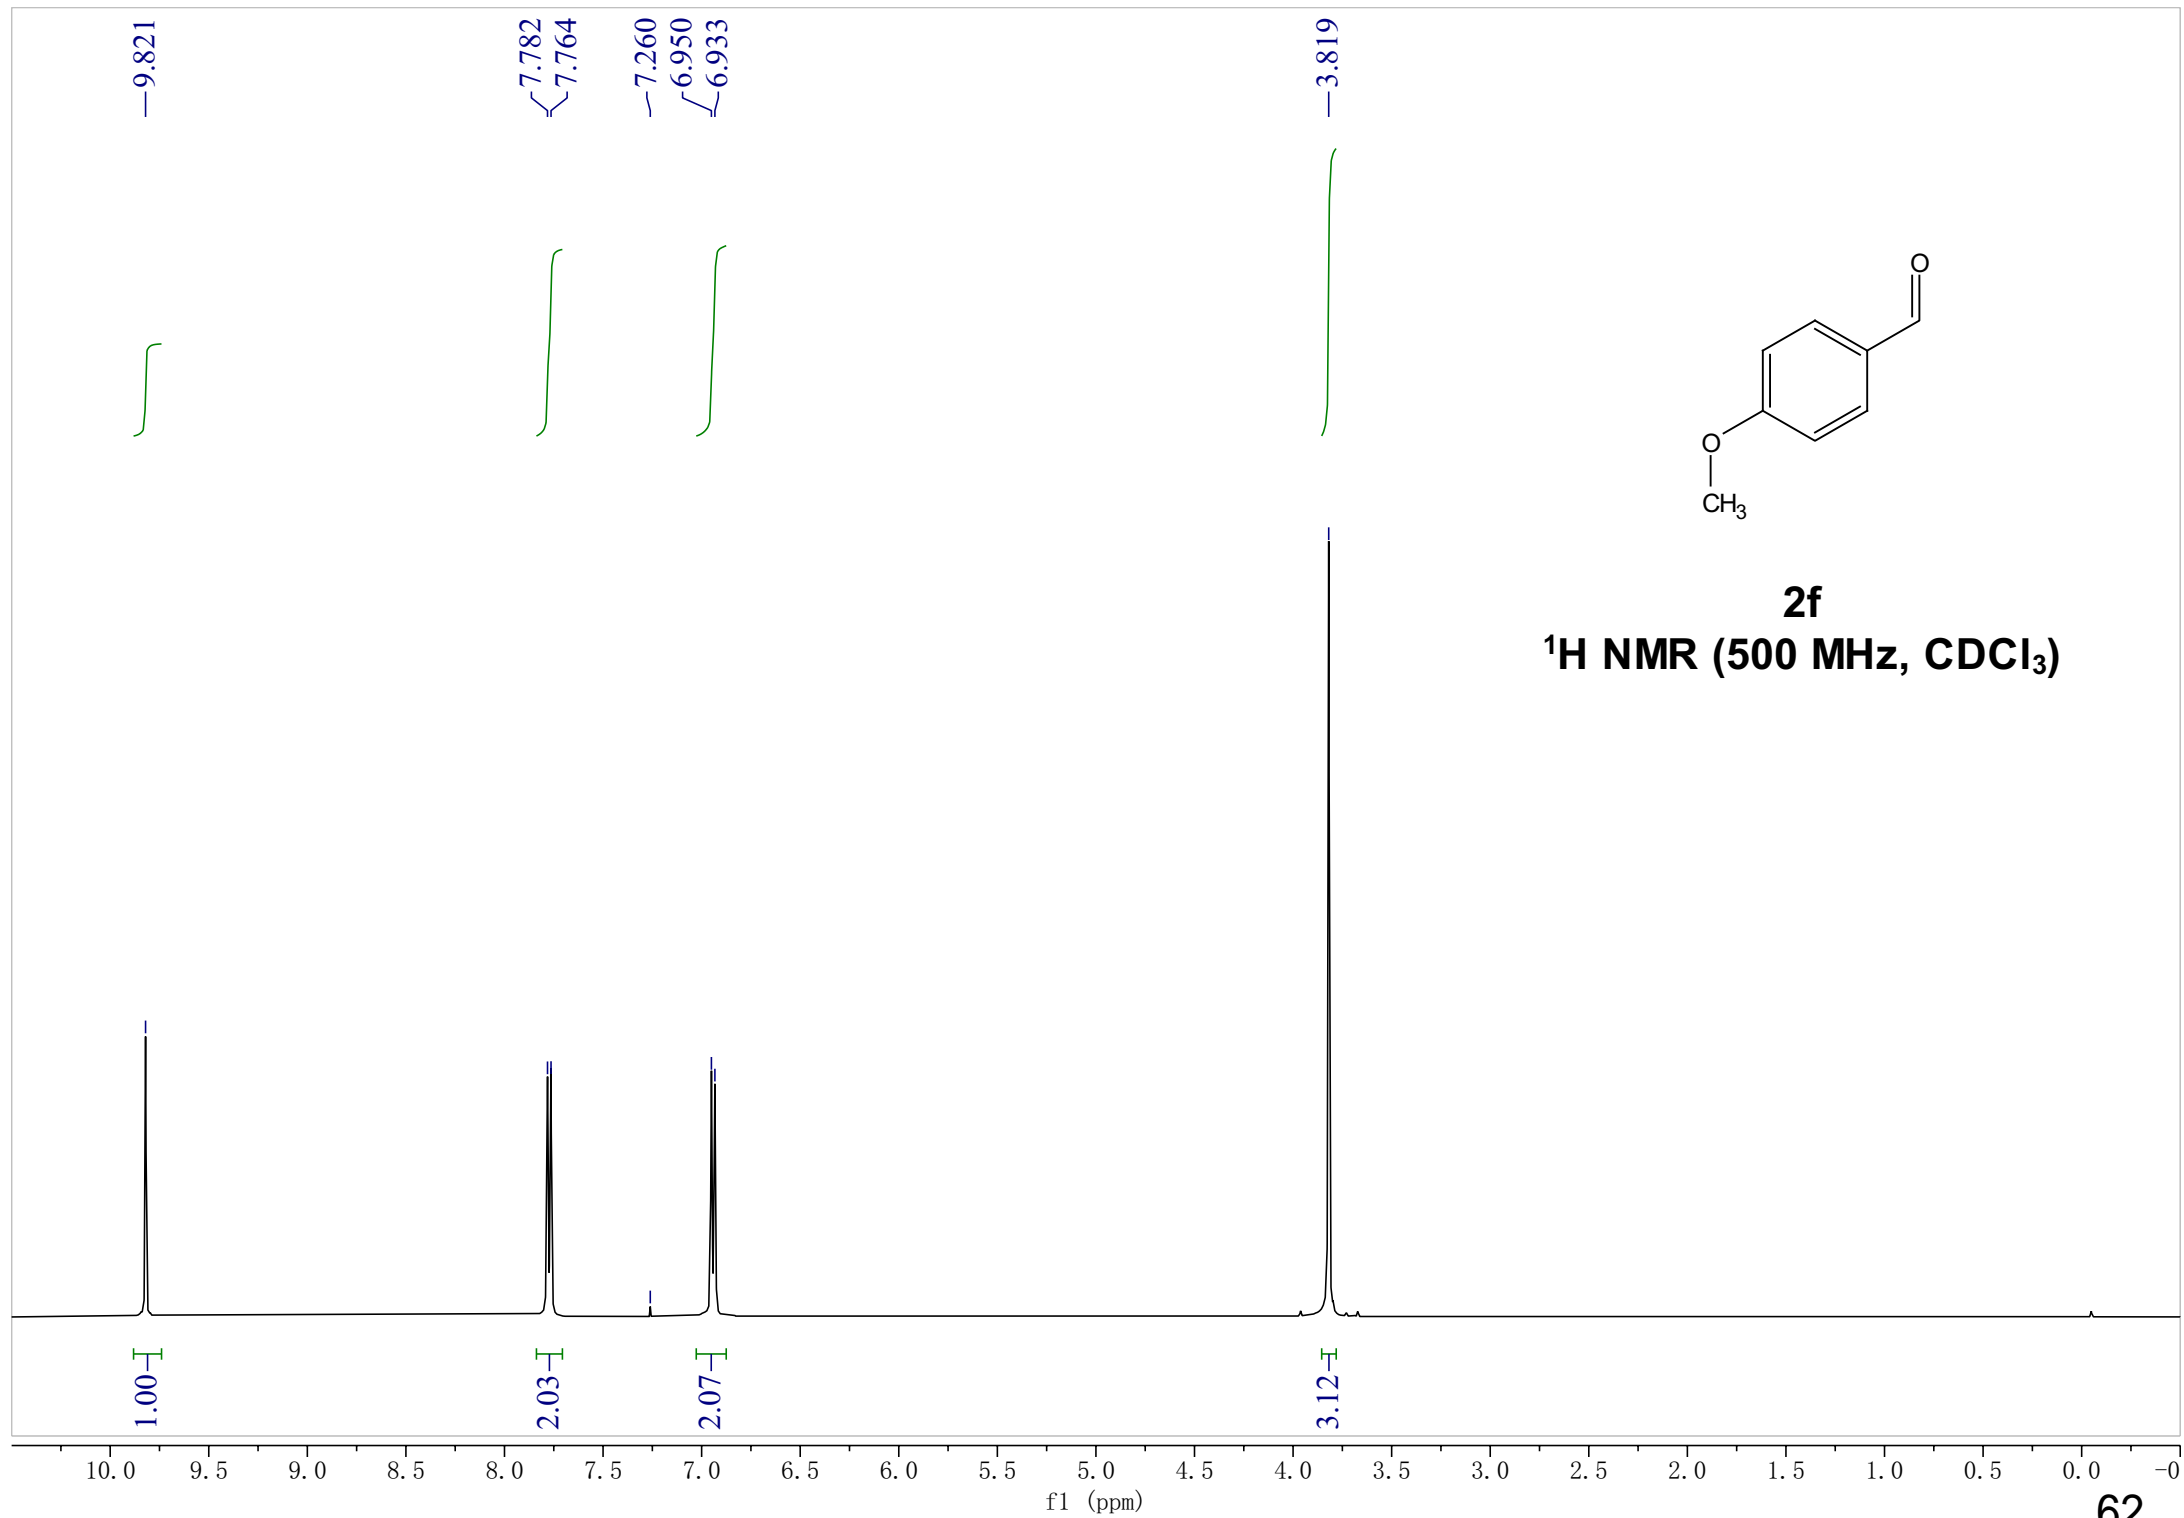

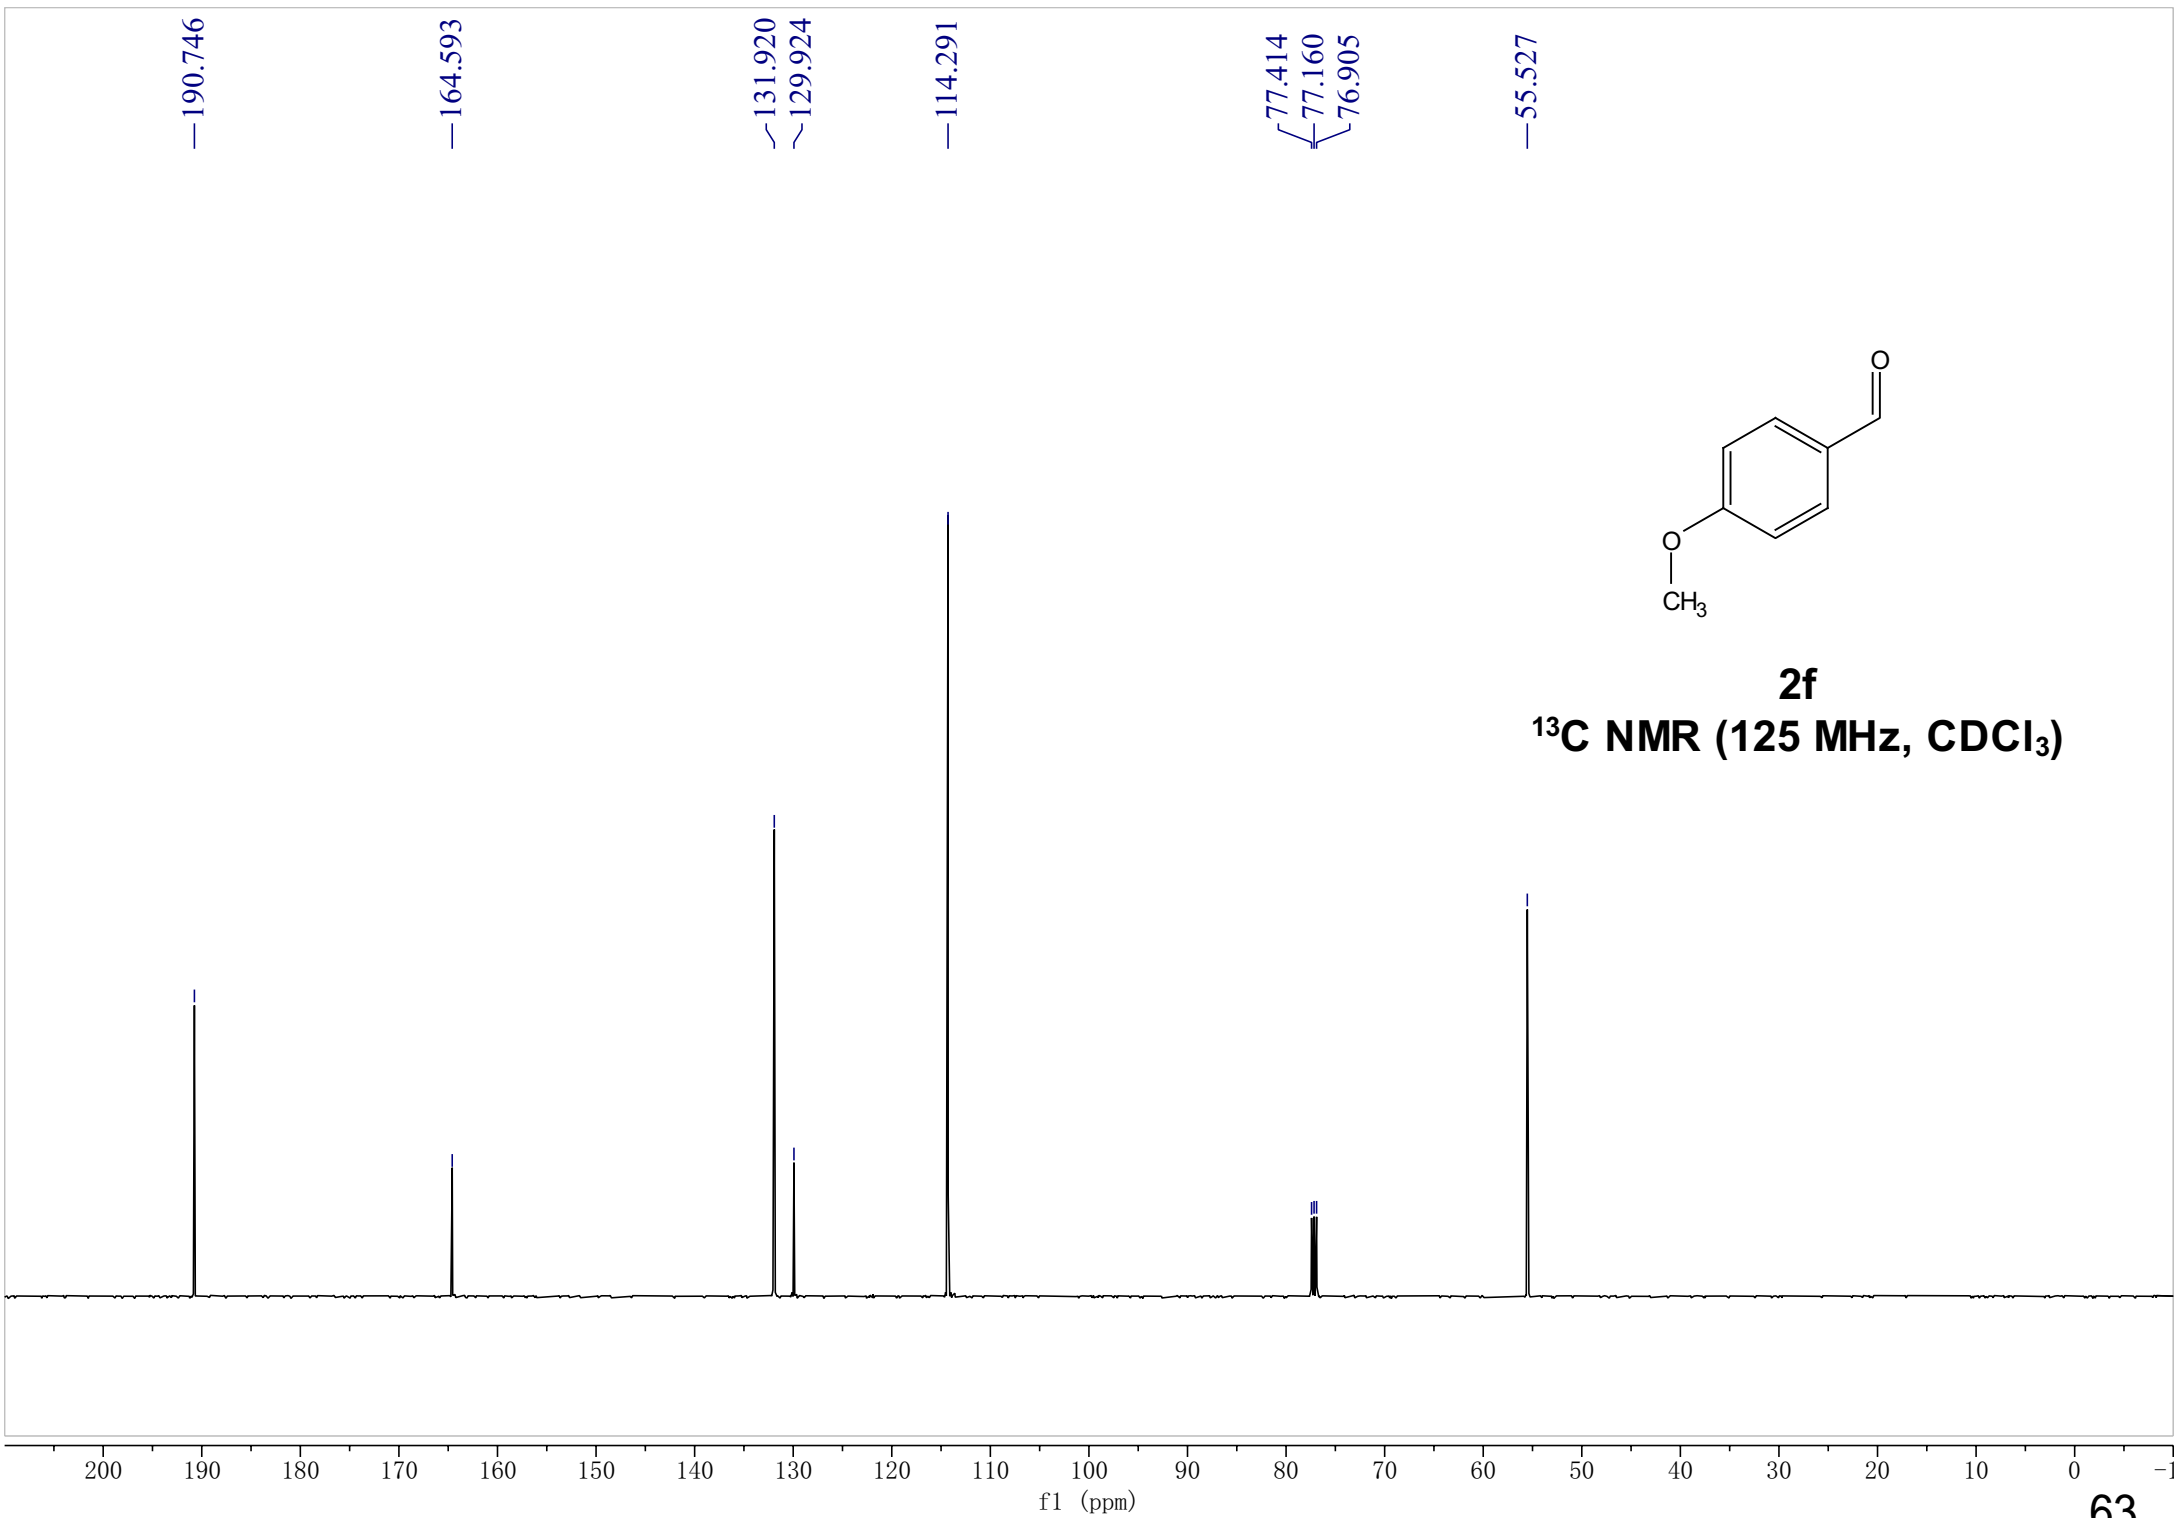



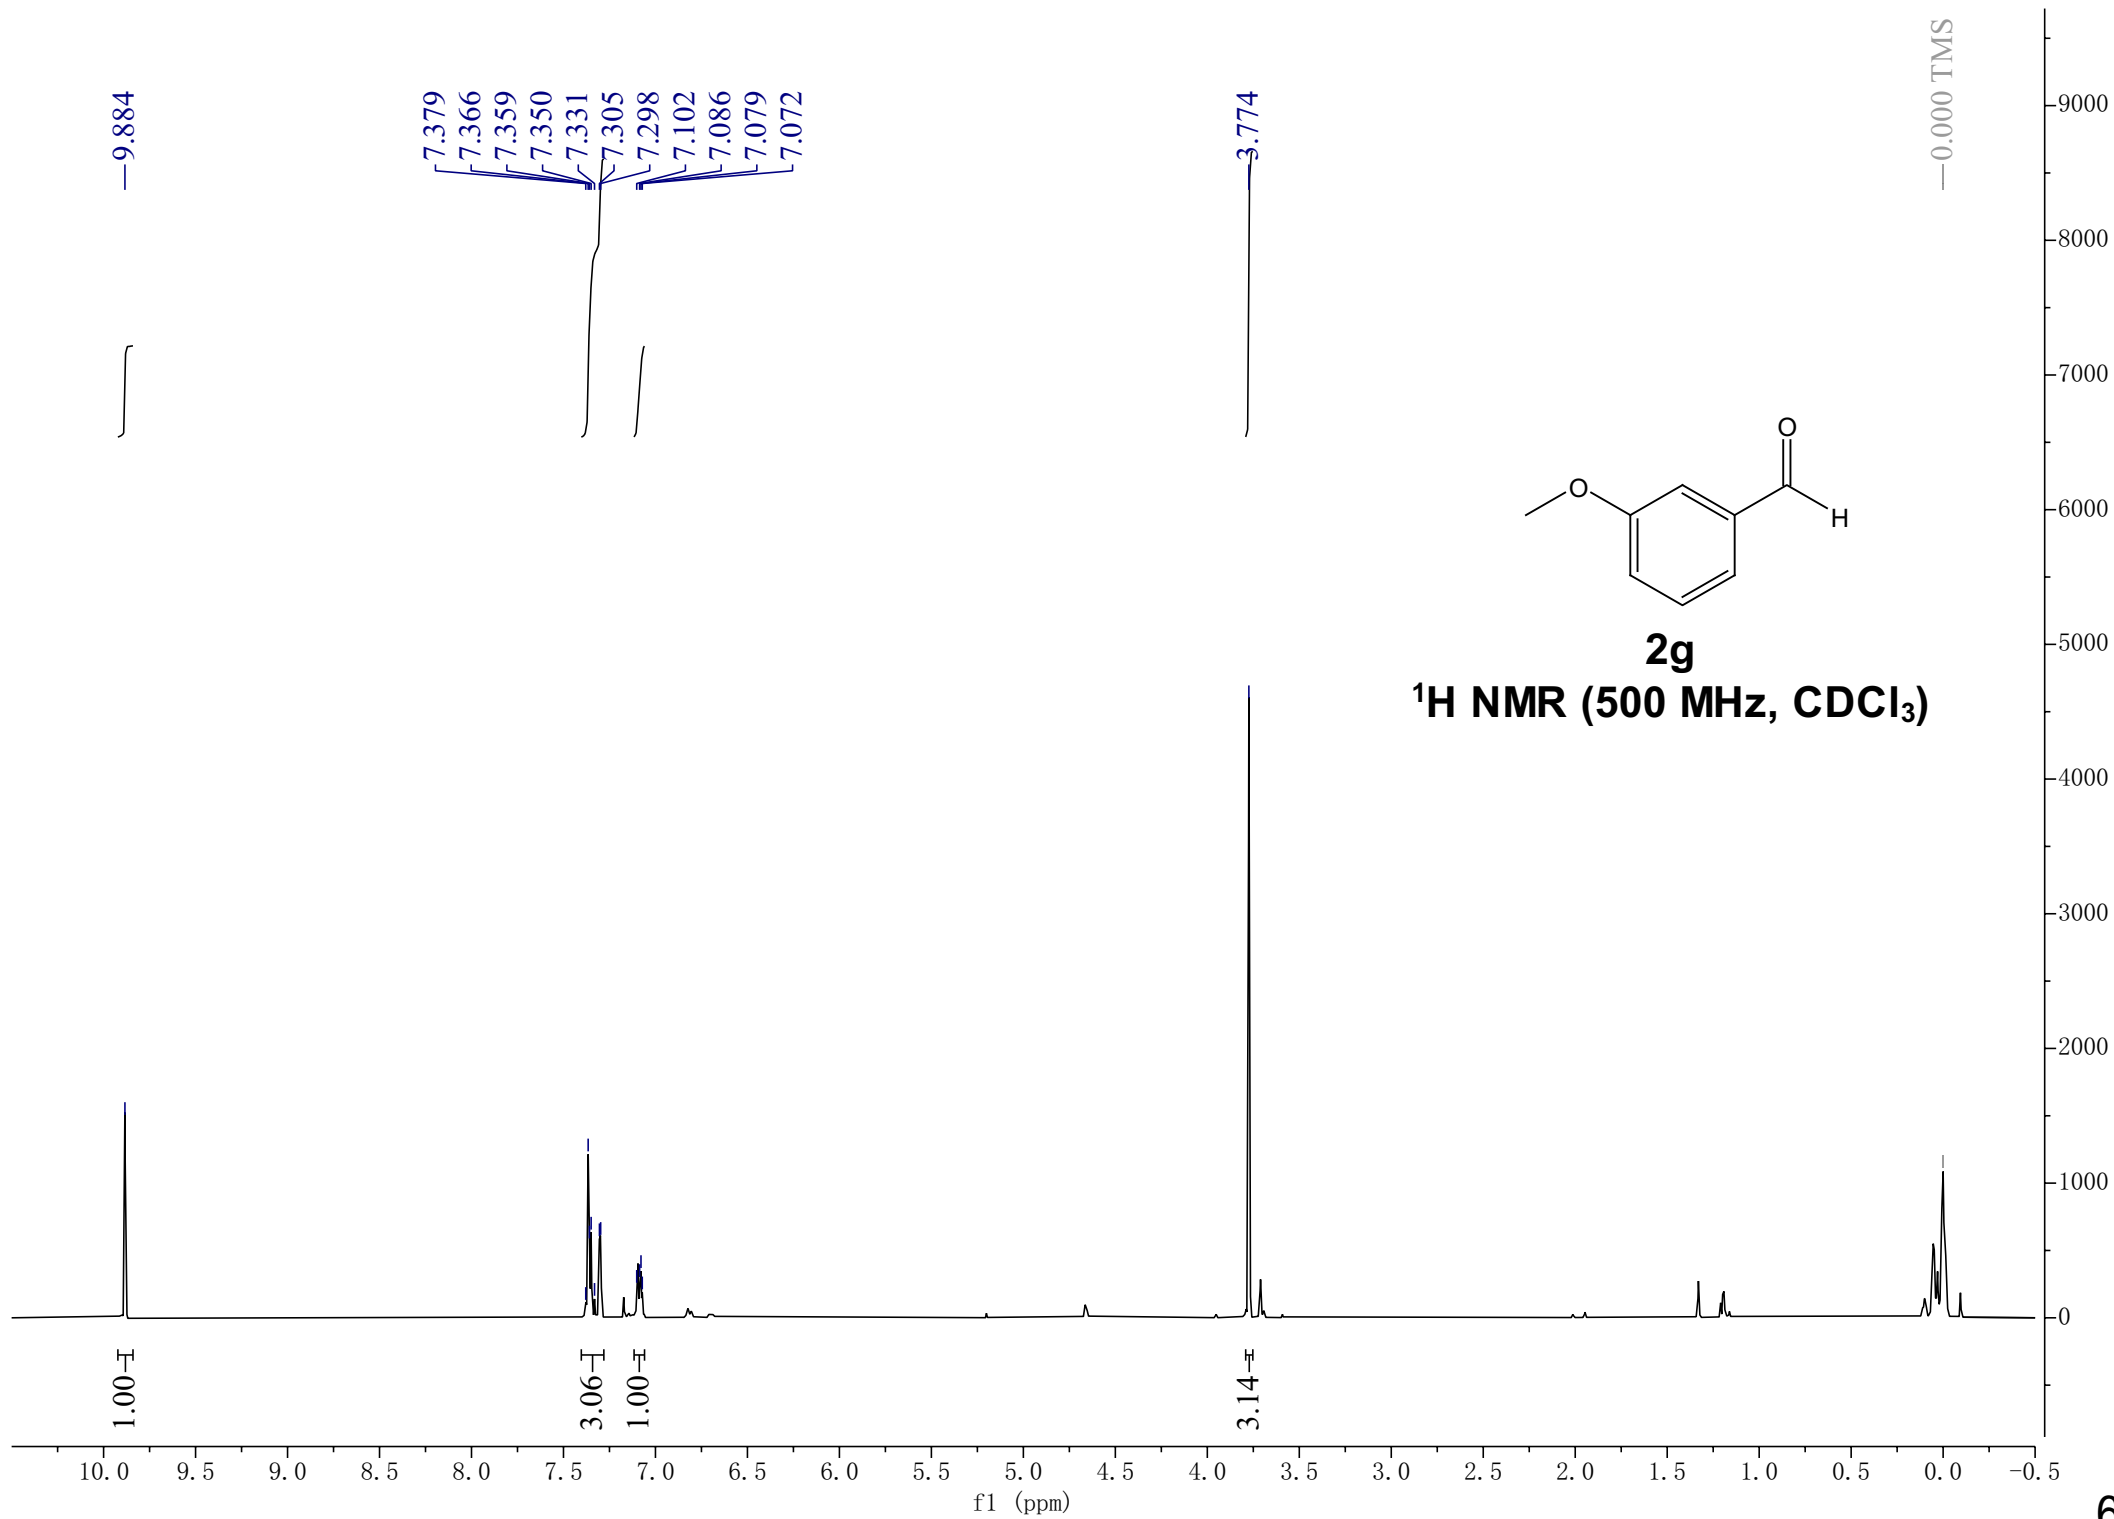

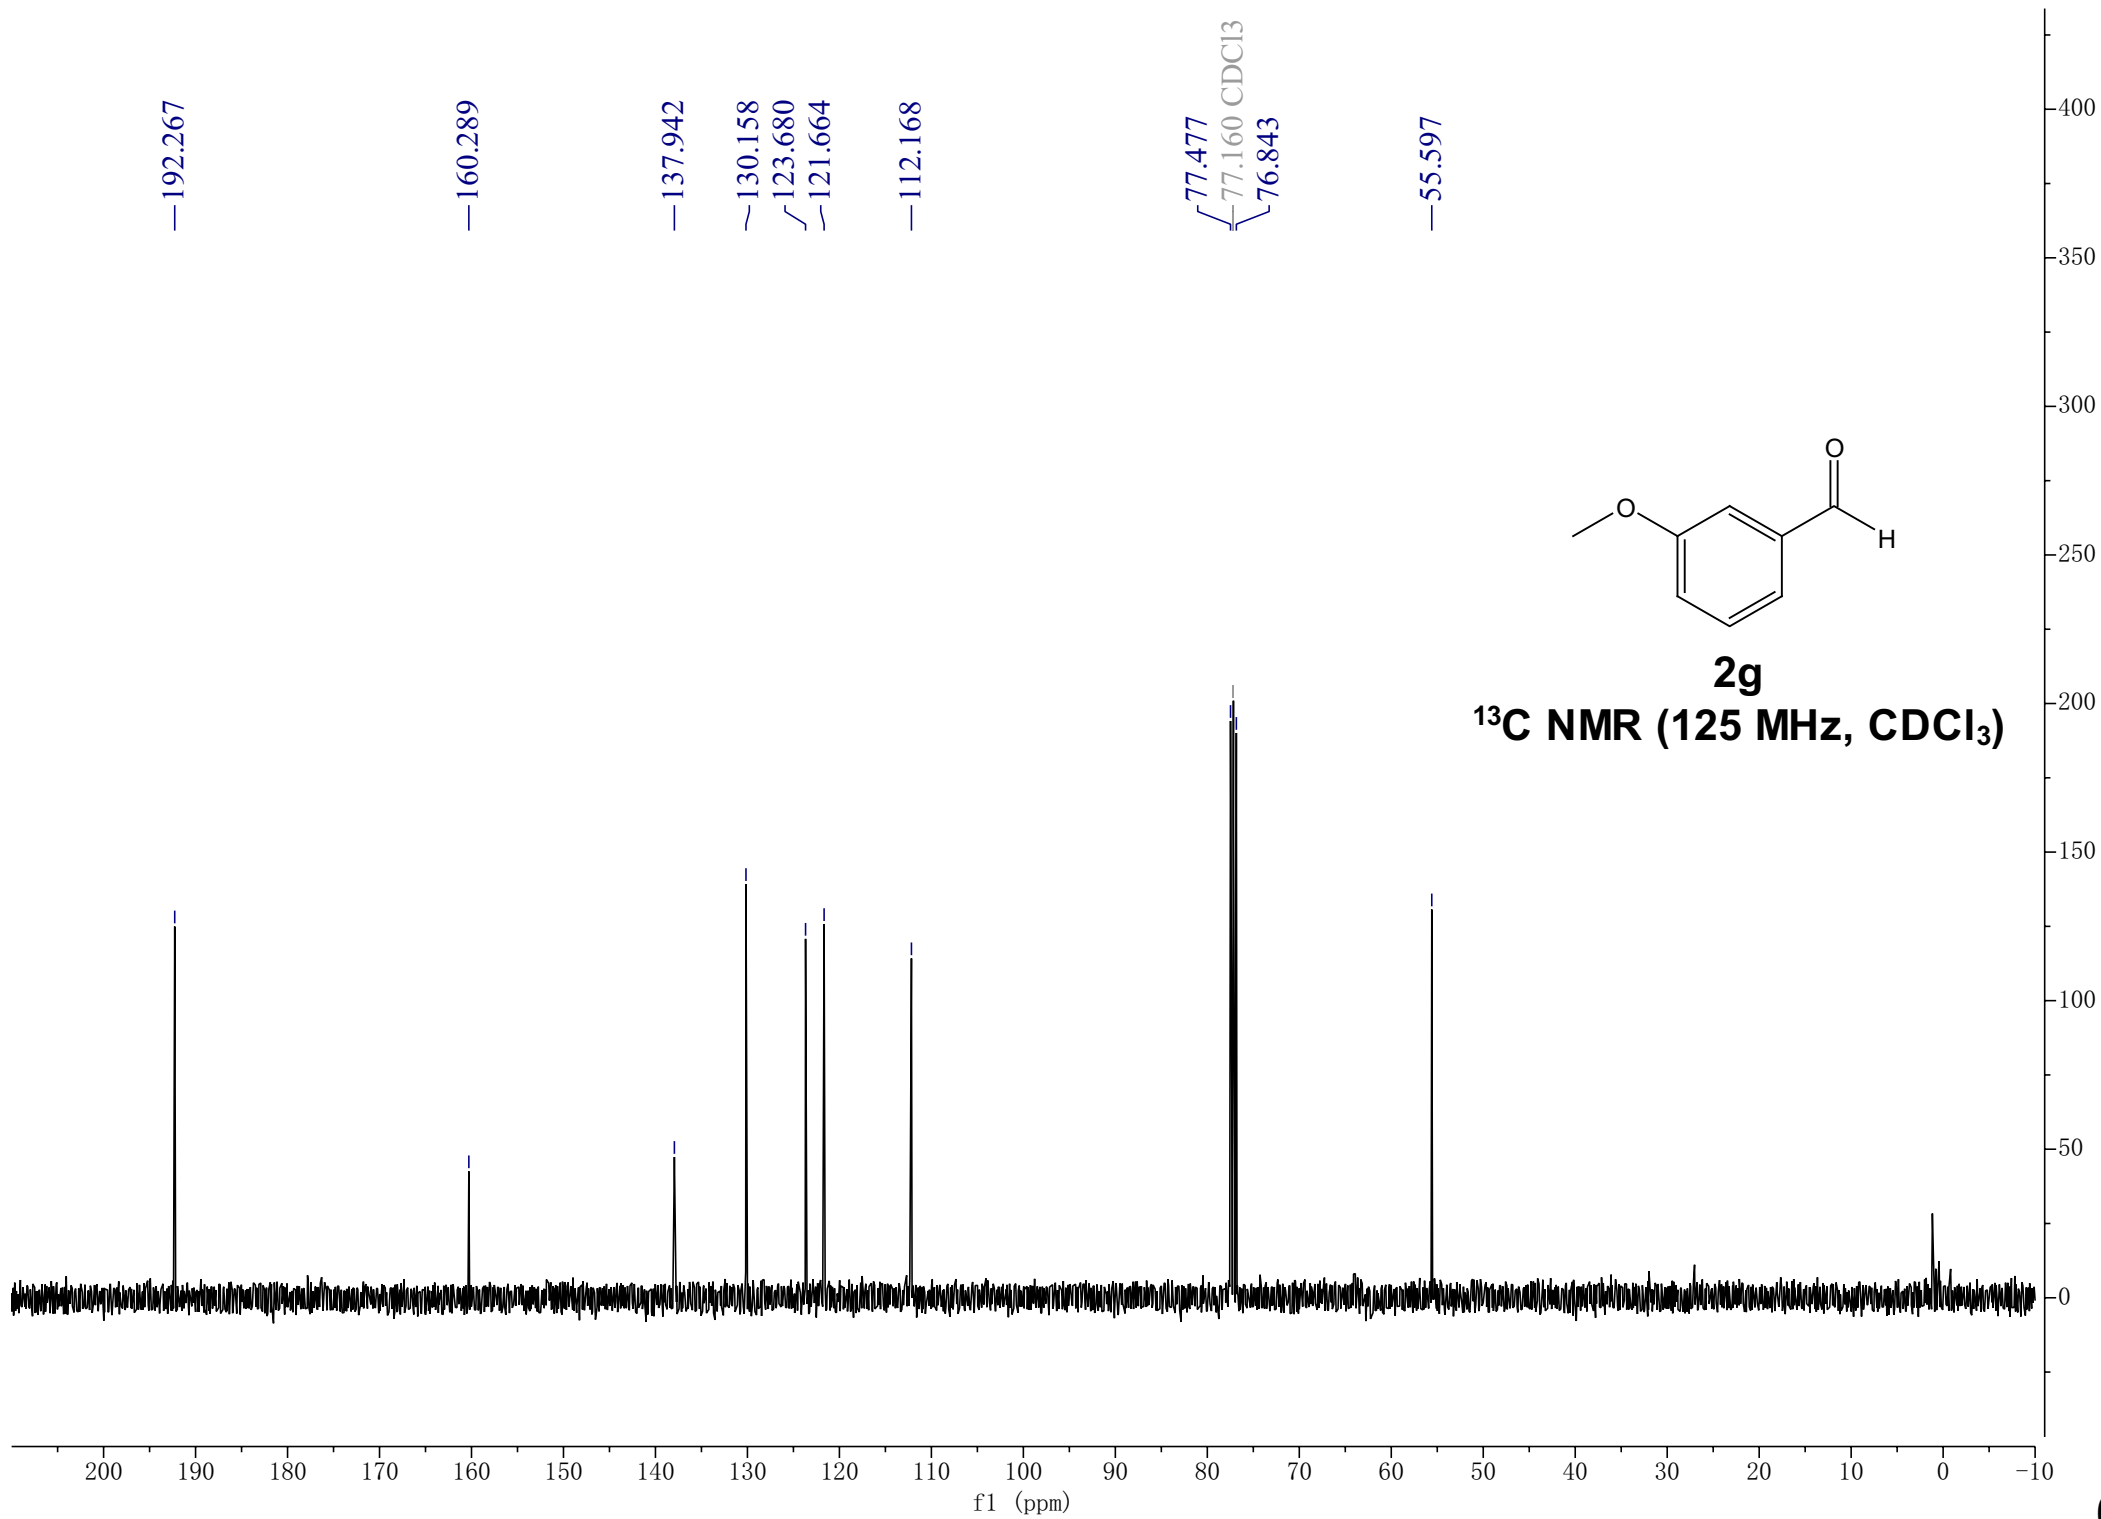

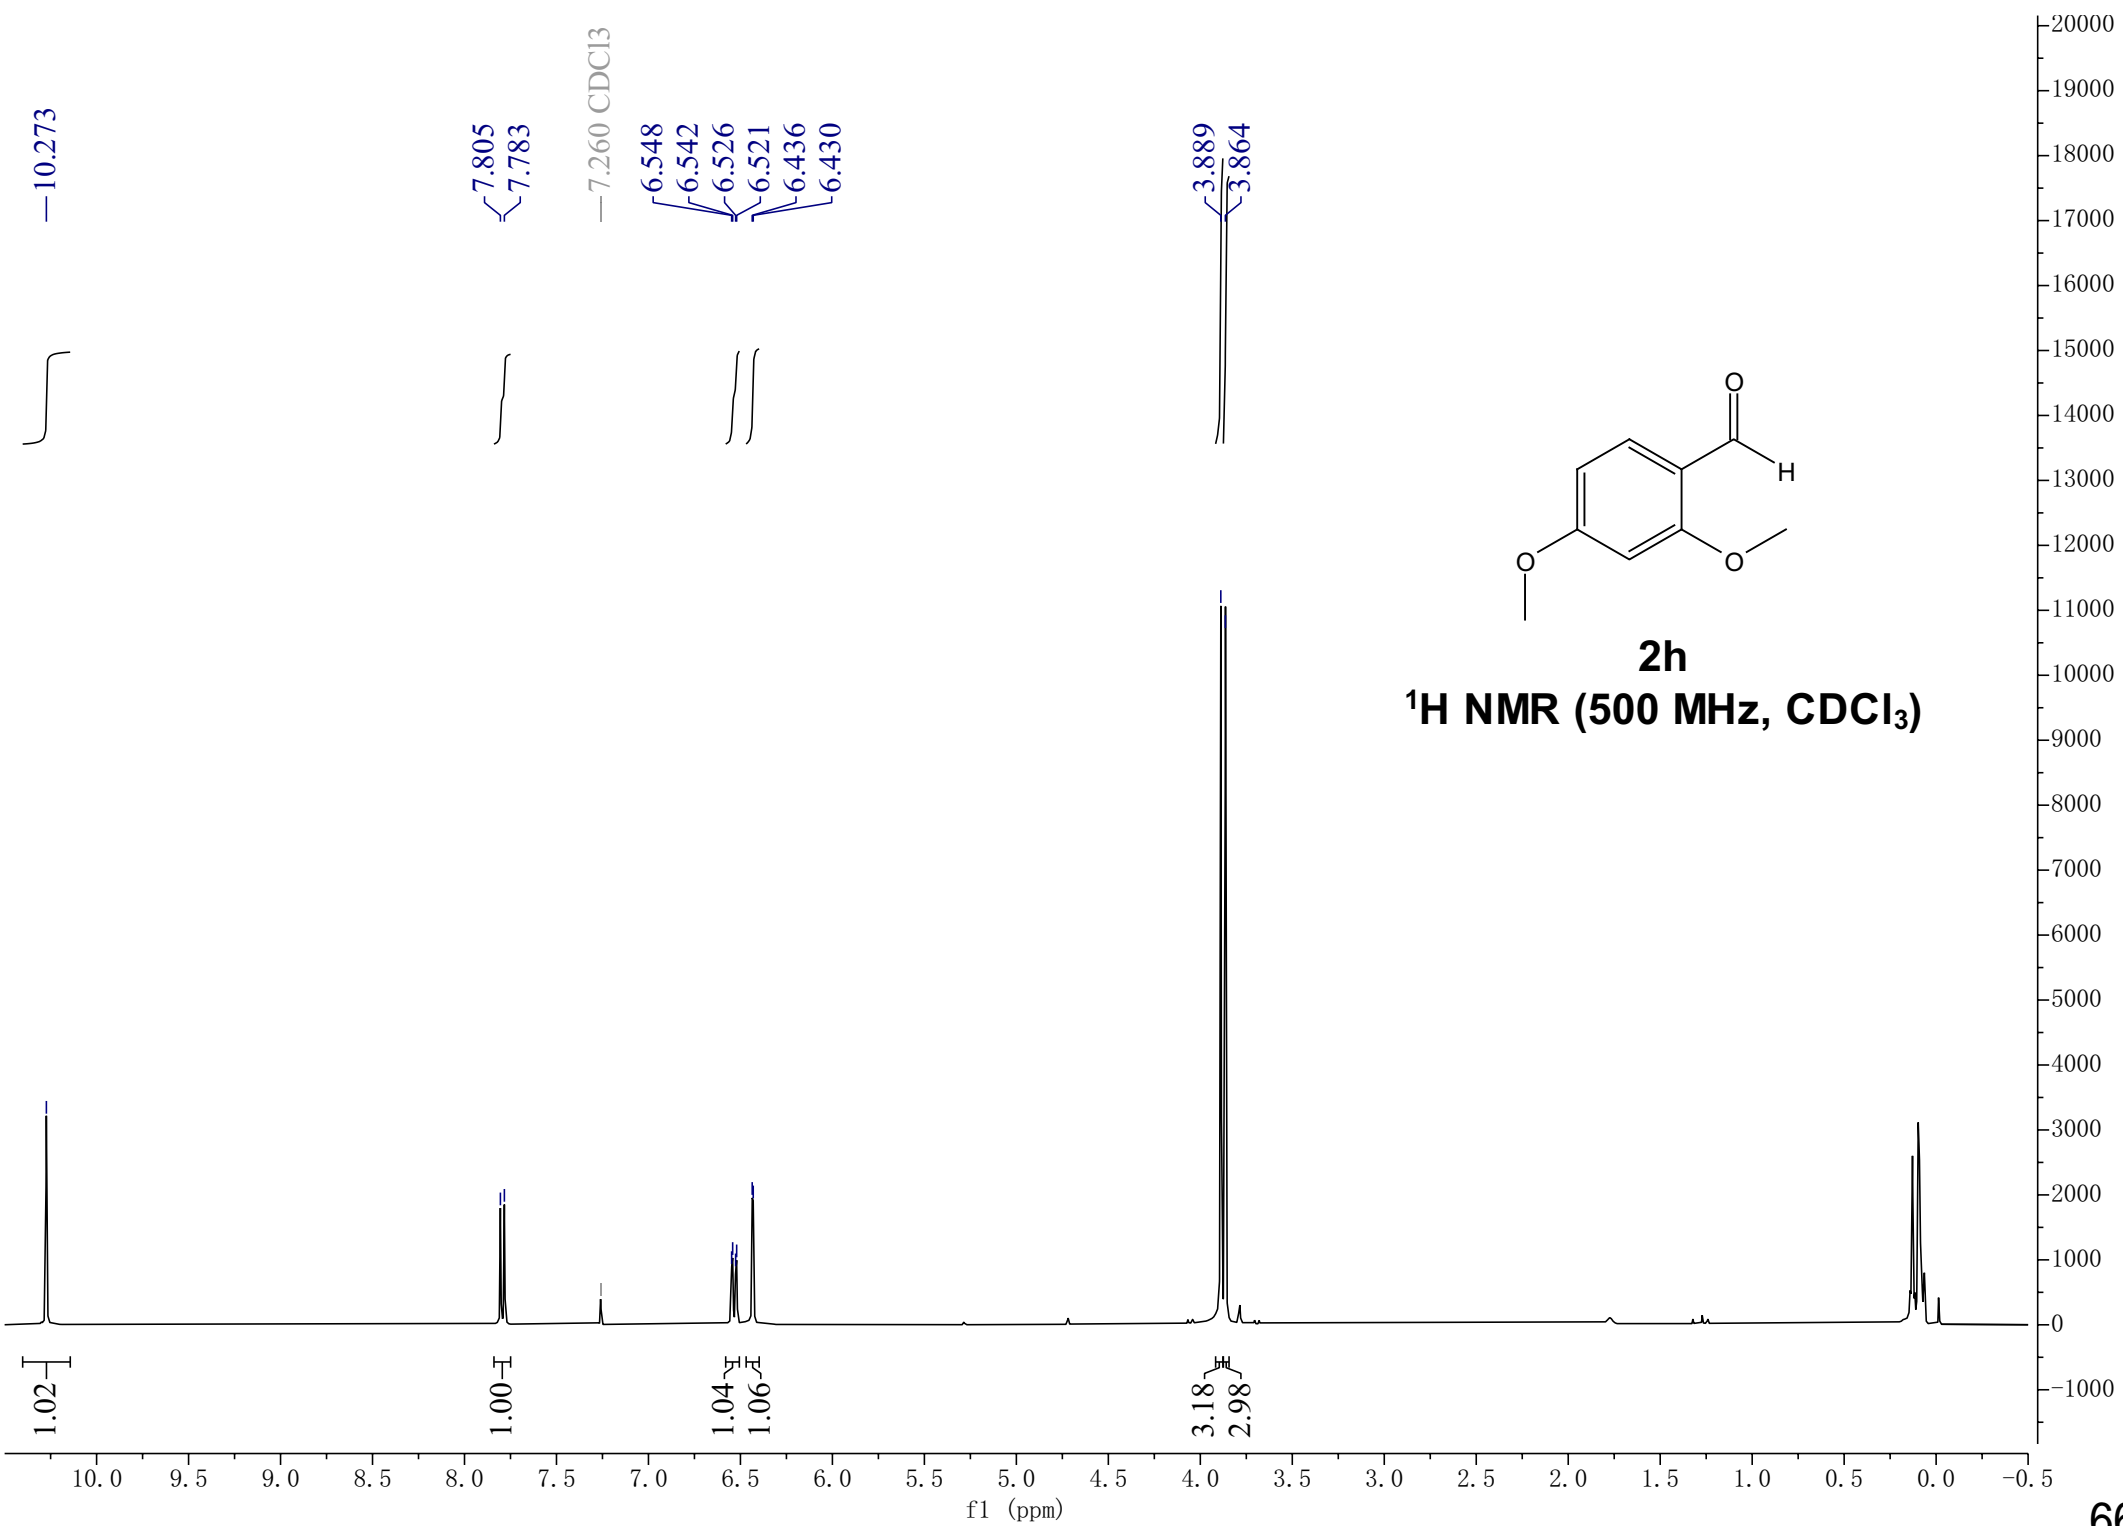

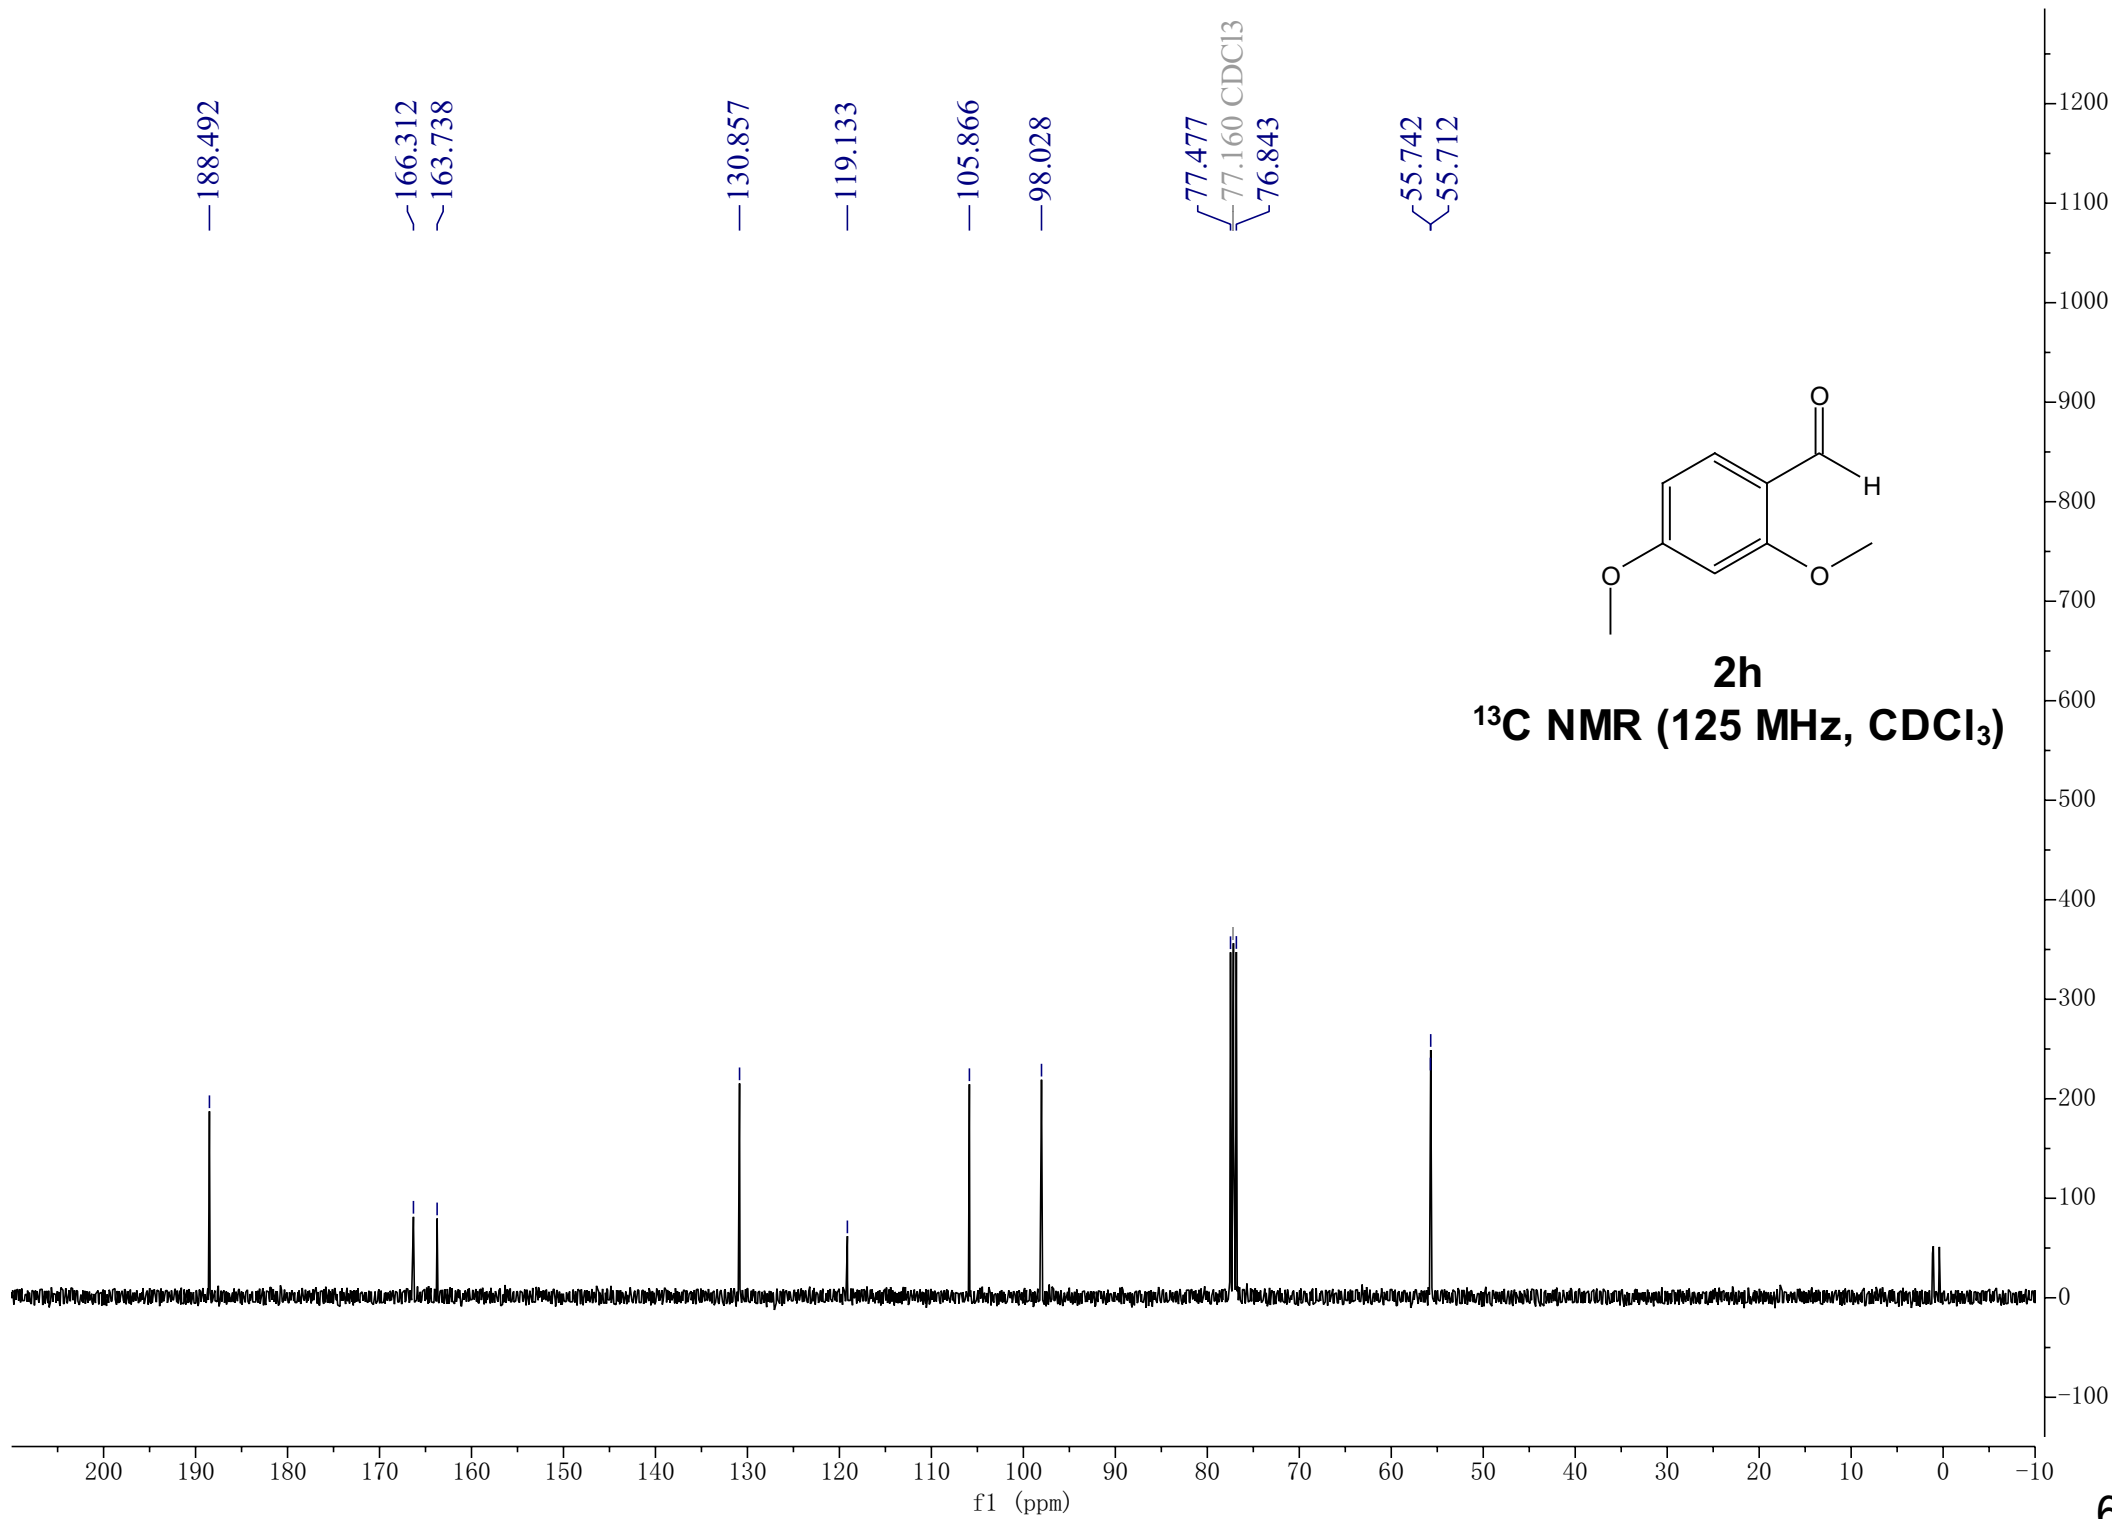

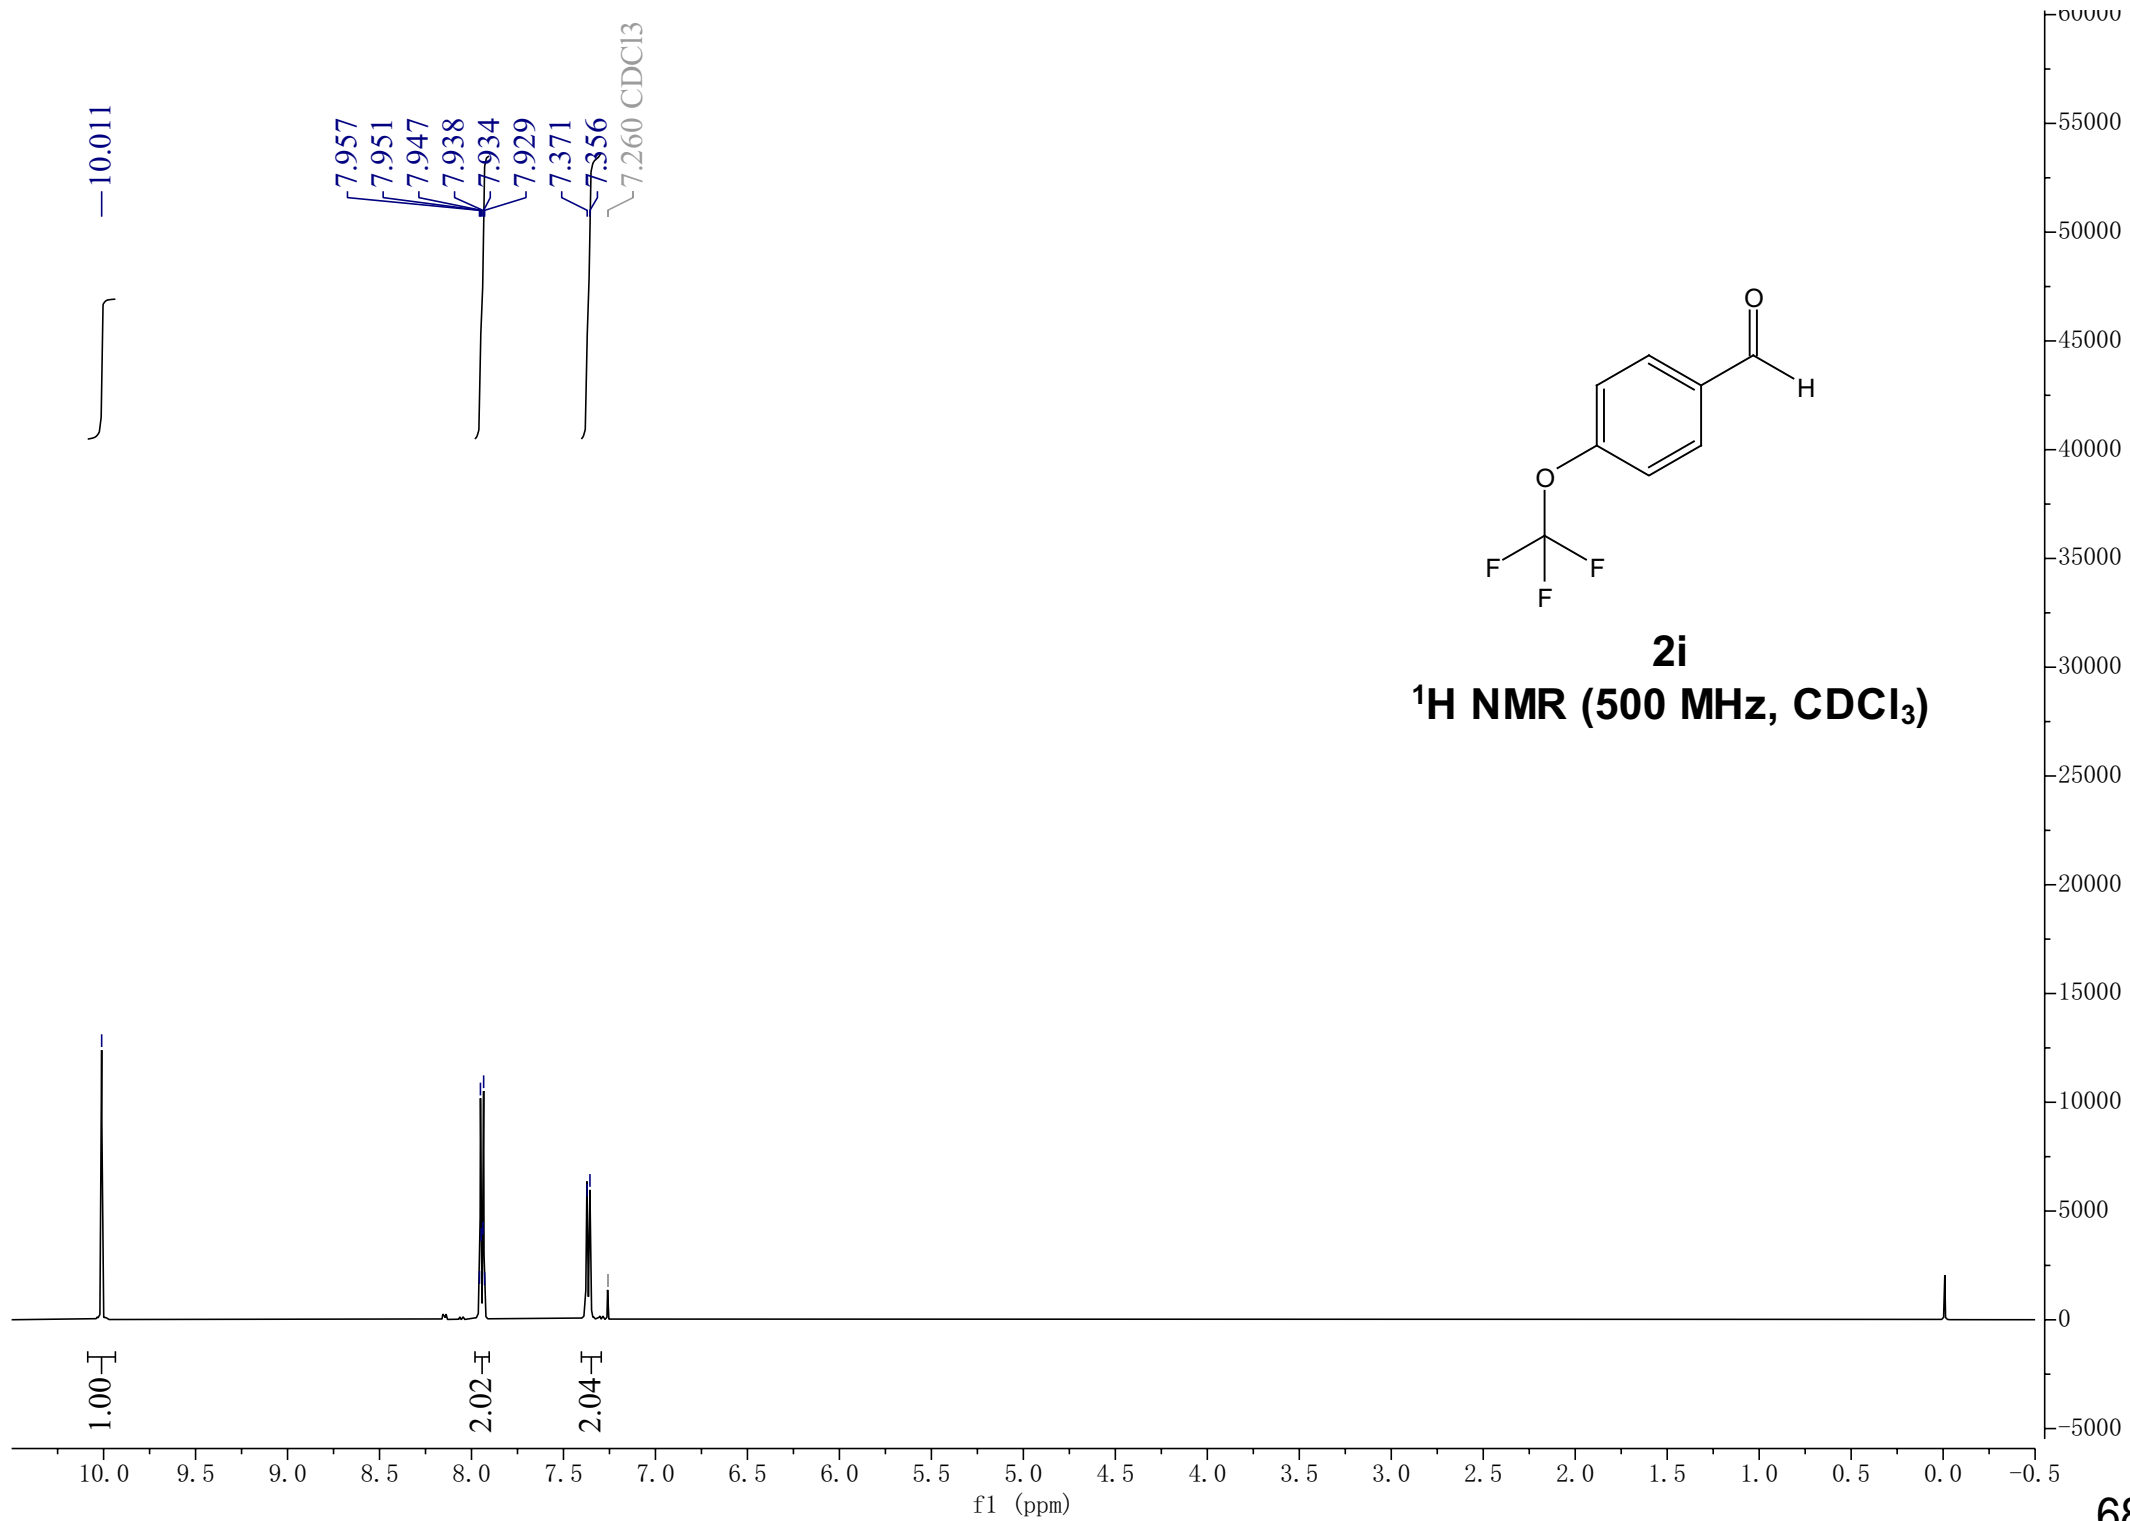

—190.648

153.720  
153.701  
153.685  
153.670

134.651  
131.720  
123.488  
121.429  
120.959  
119.366  
117.303

77.414  
77.160 CDCl<sub>3</sub>  
76.902

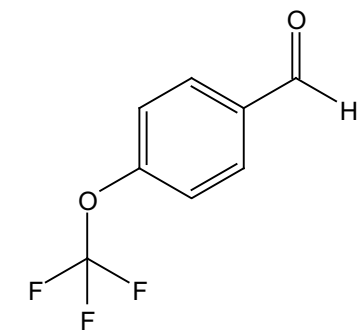

**2i**

**<sup>13</sup>C NMR (125 MHz, CDCl<sub>3</sub>)**

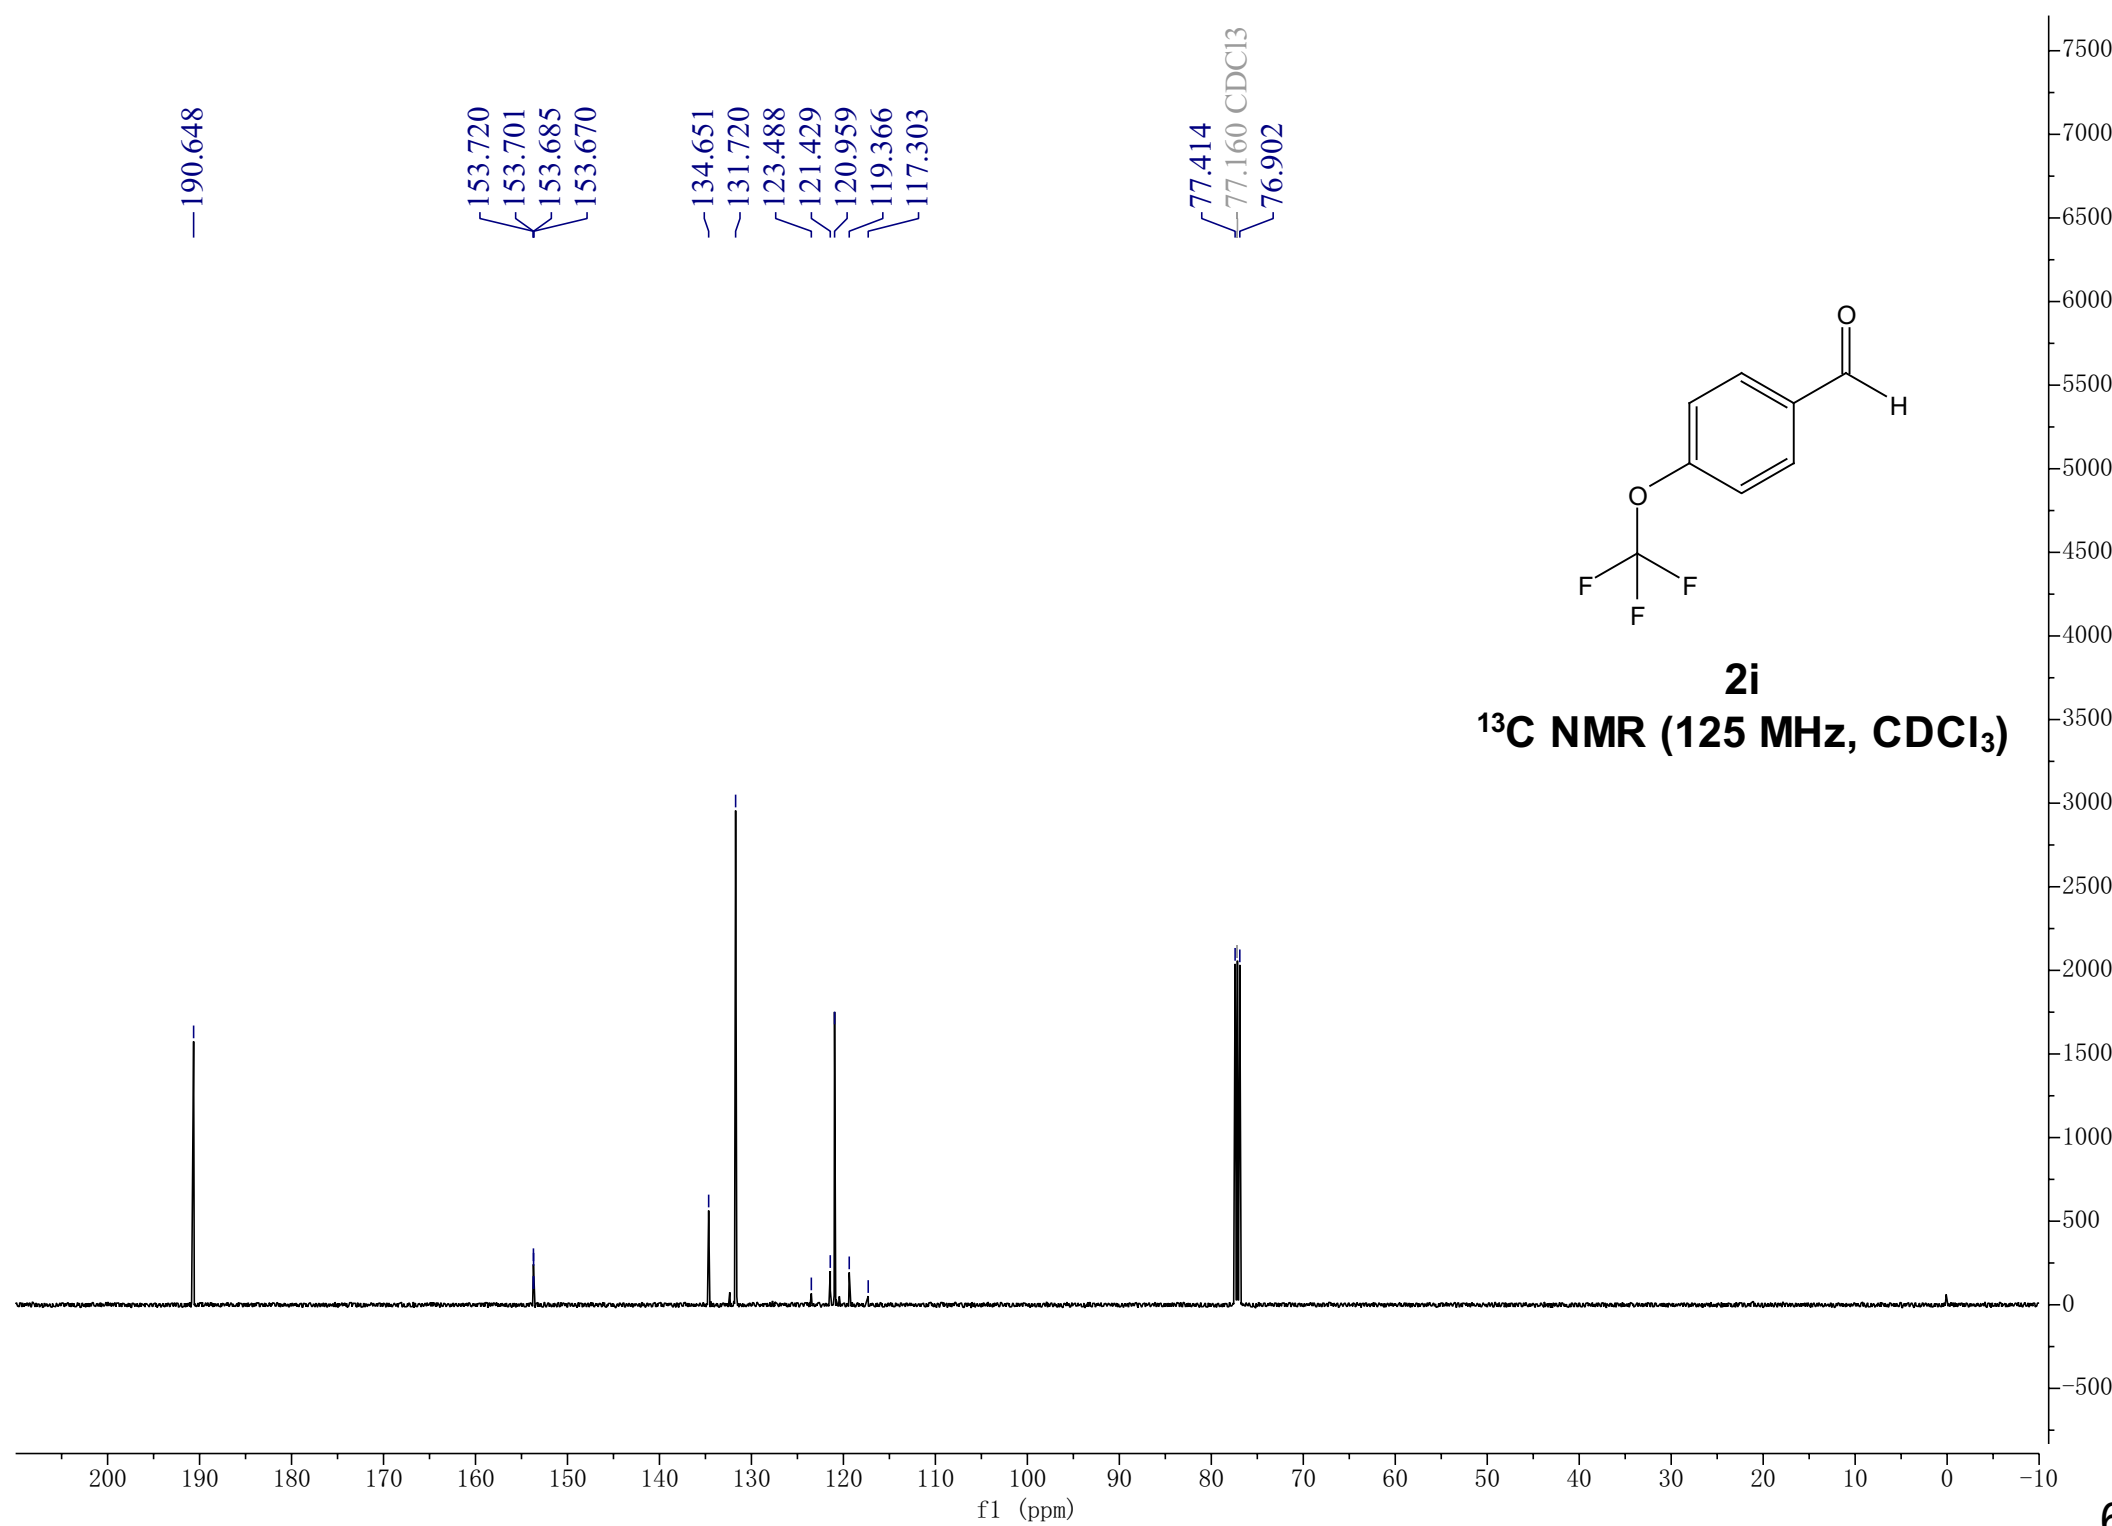

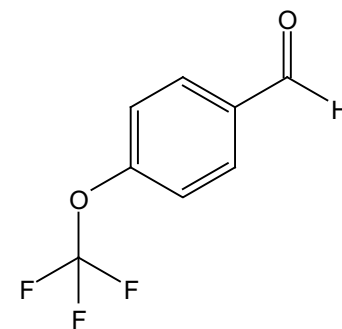

**2i**  
**<sup>19</sup>F NMR (470 MHz, CDCl<sub>3</sub>)**

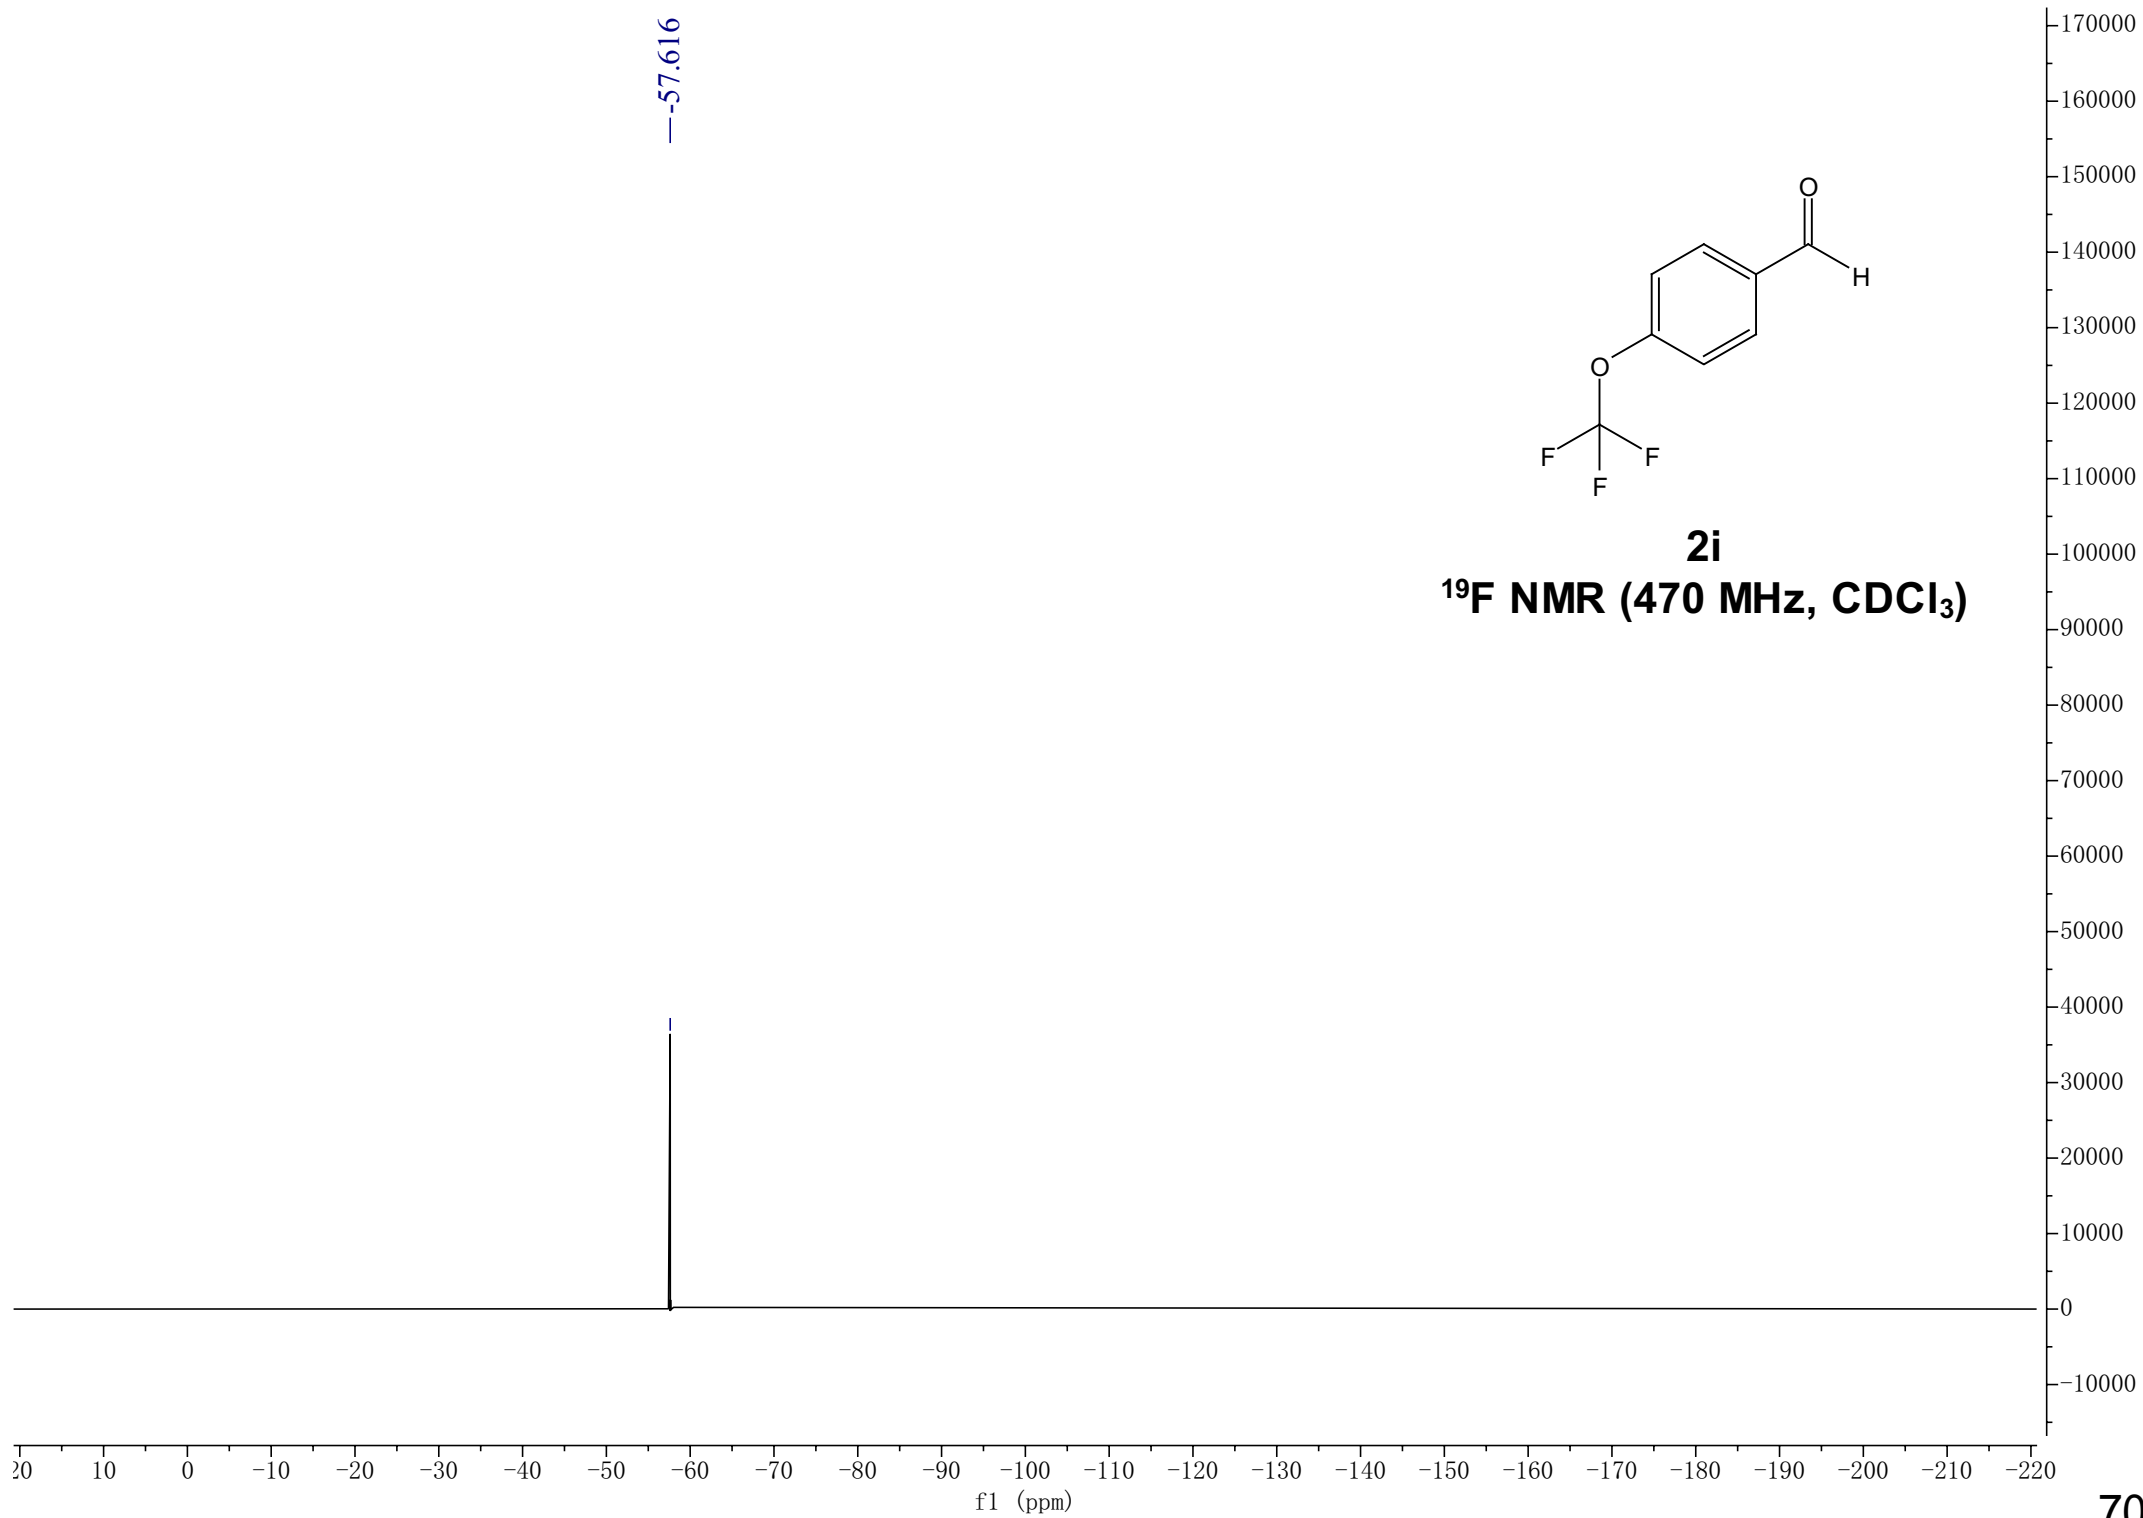

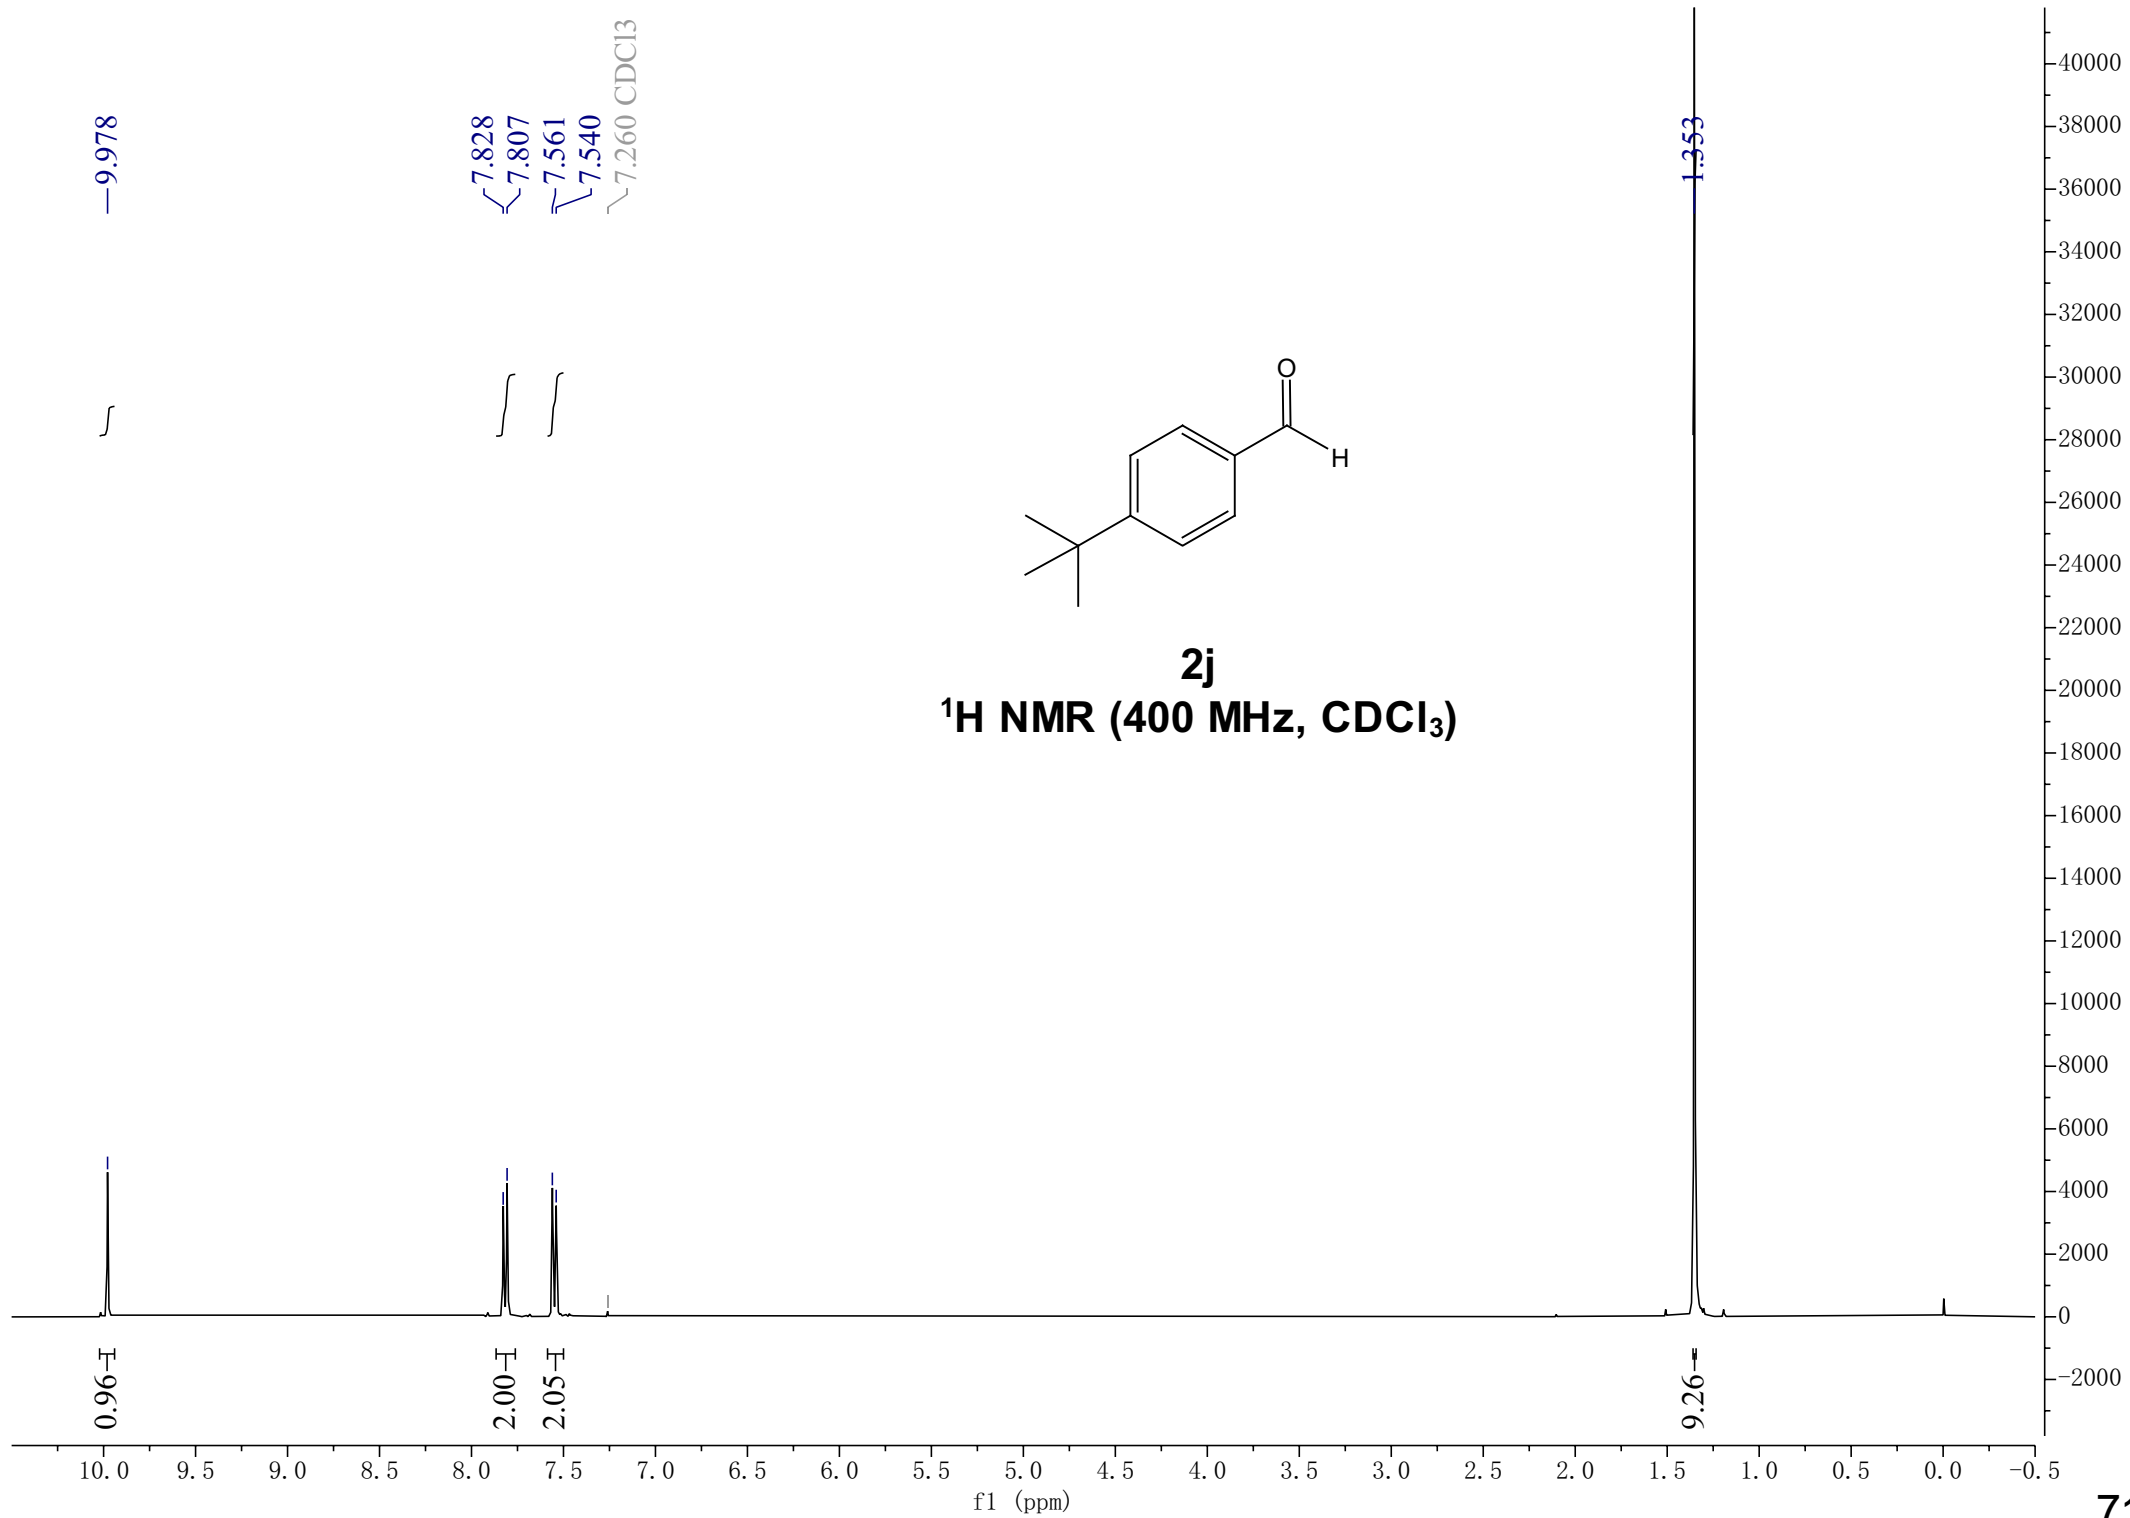



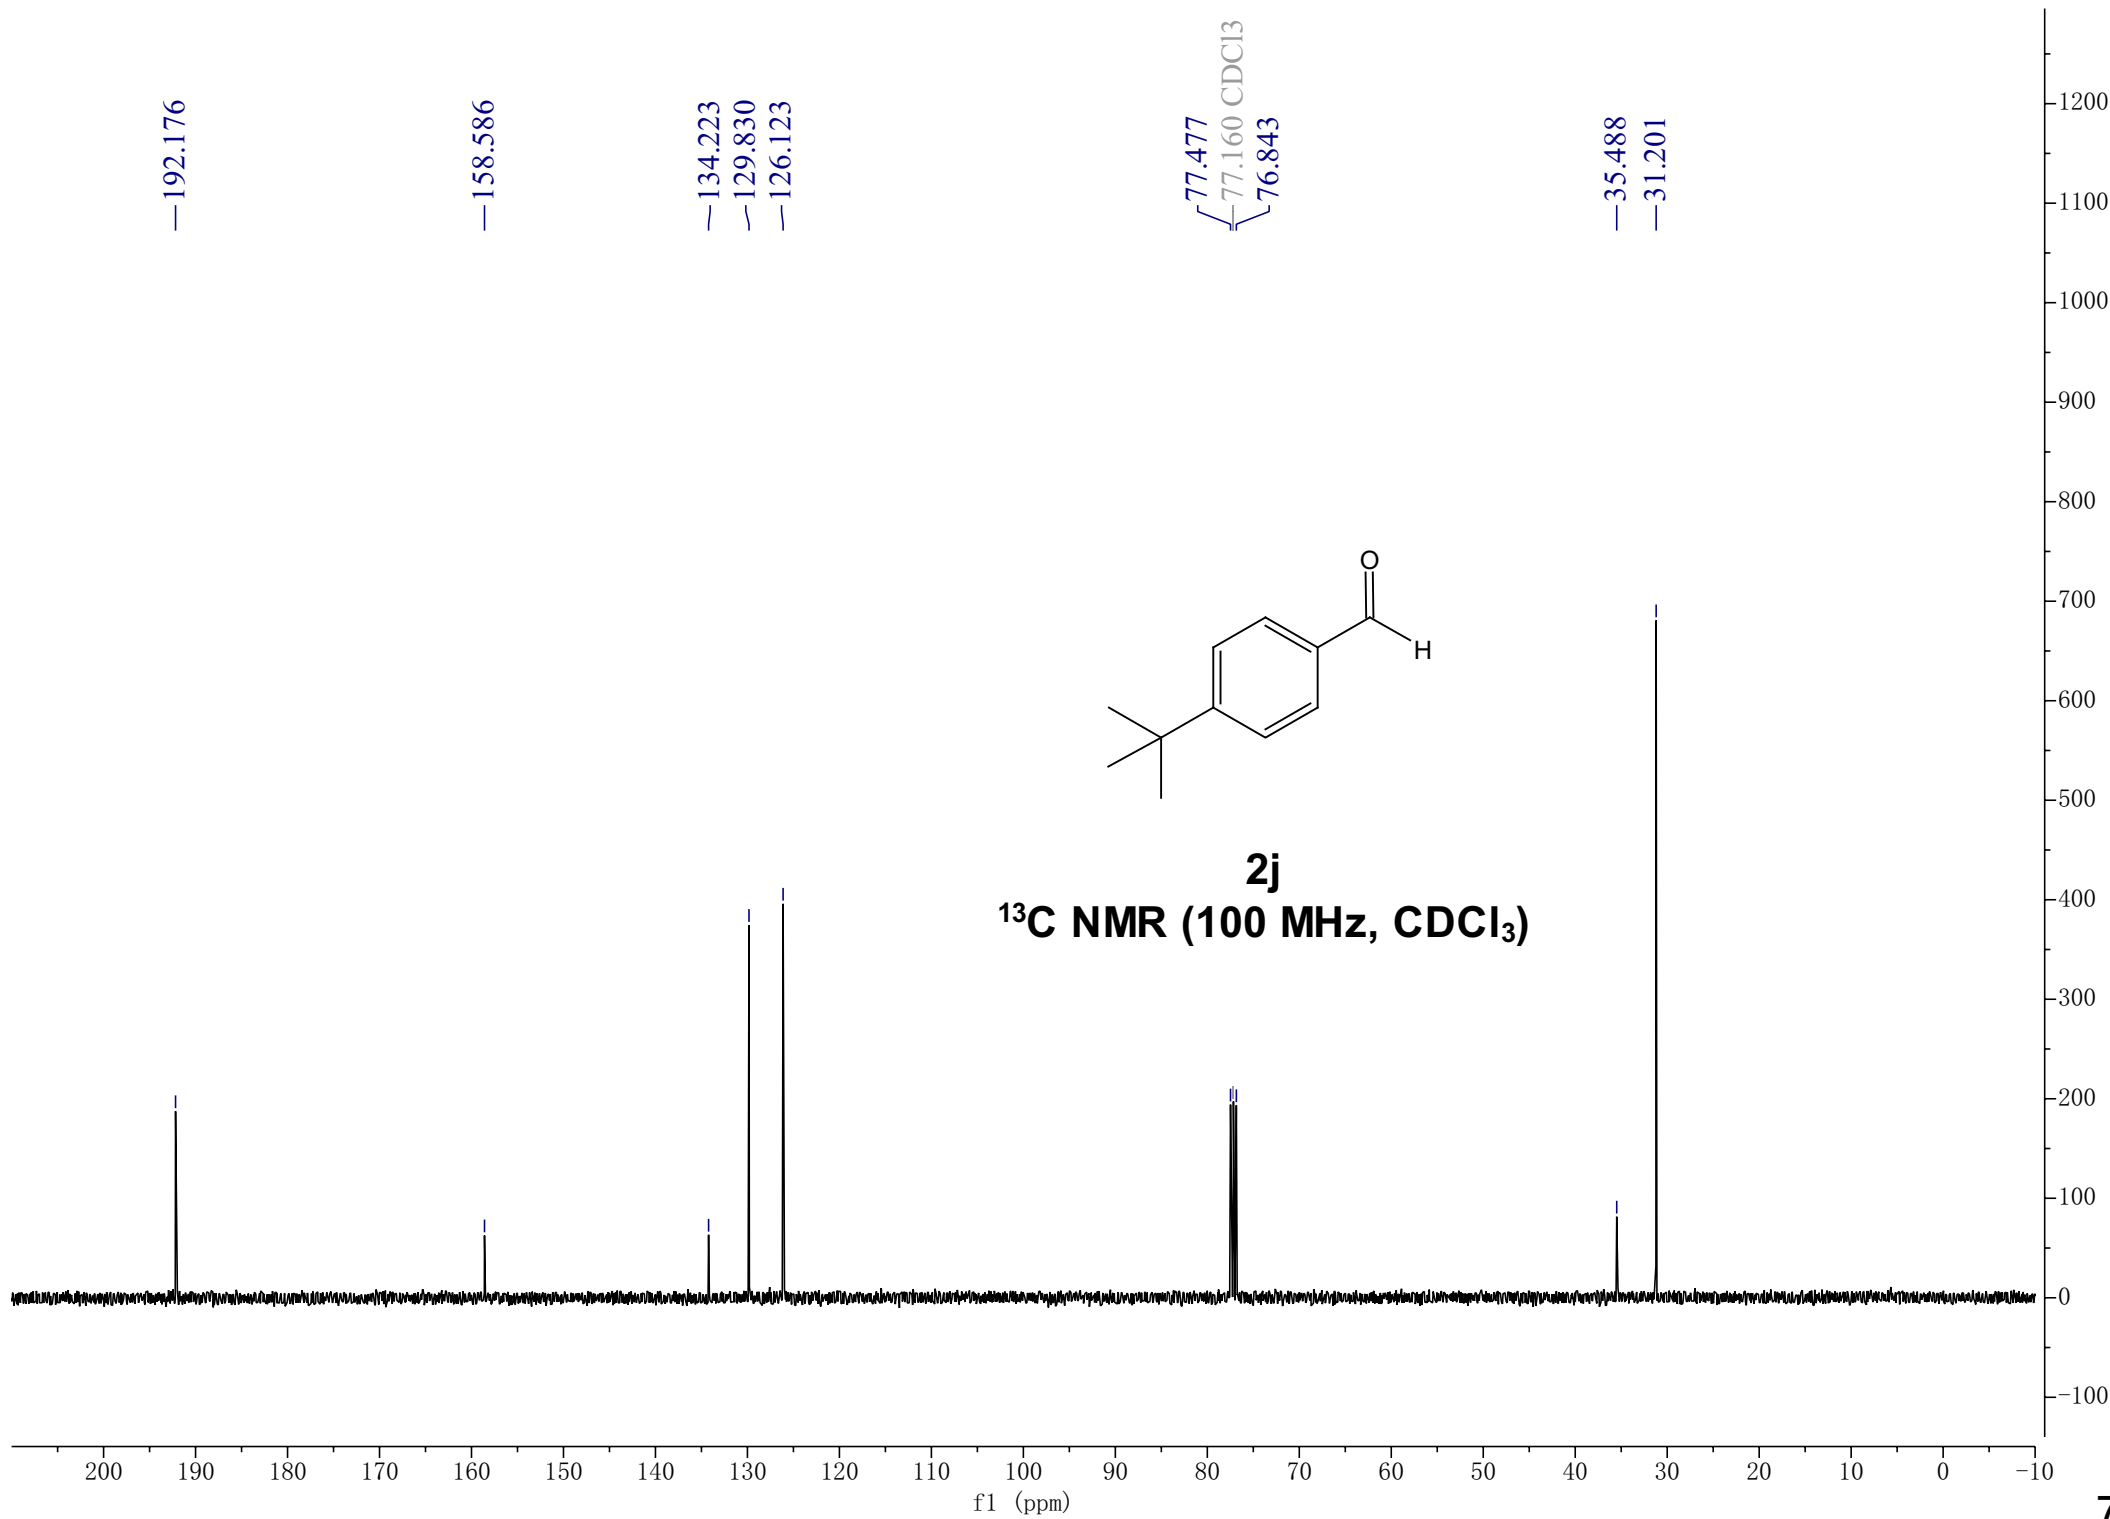

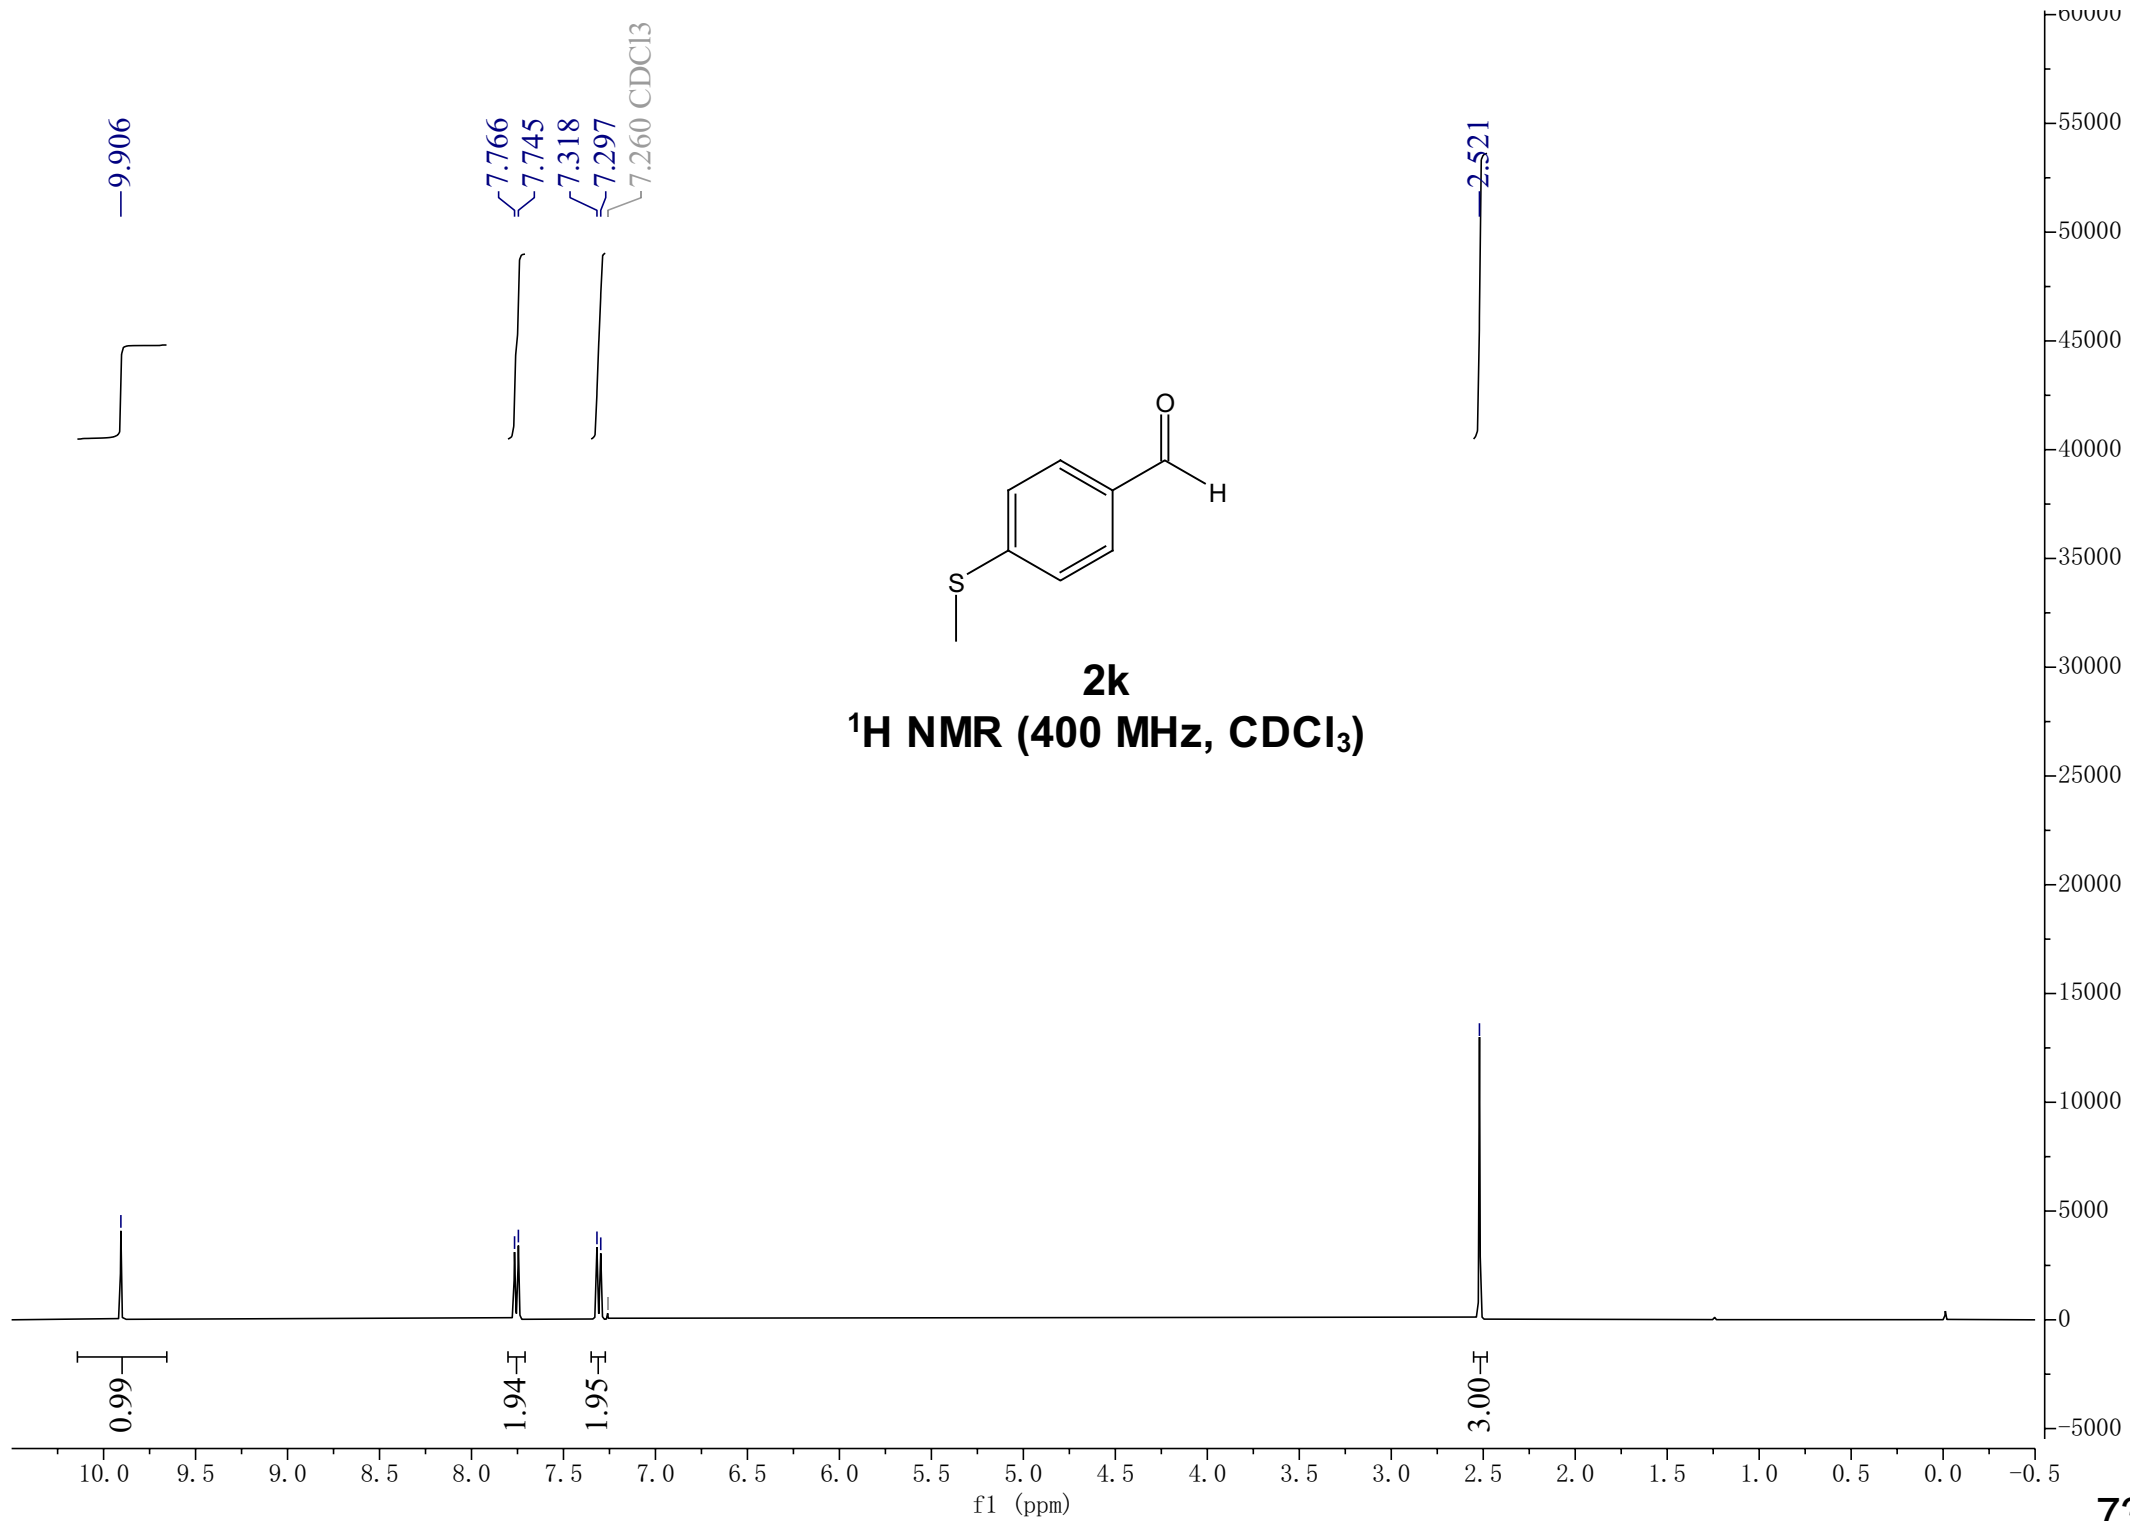

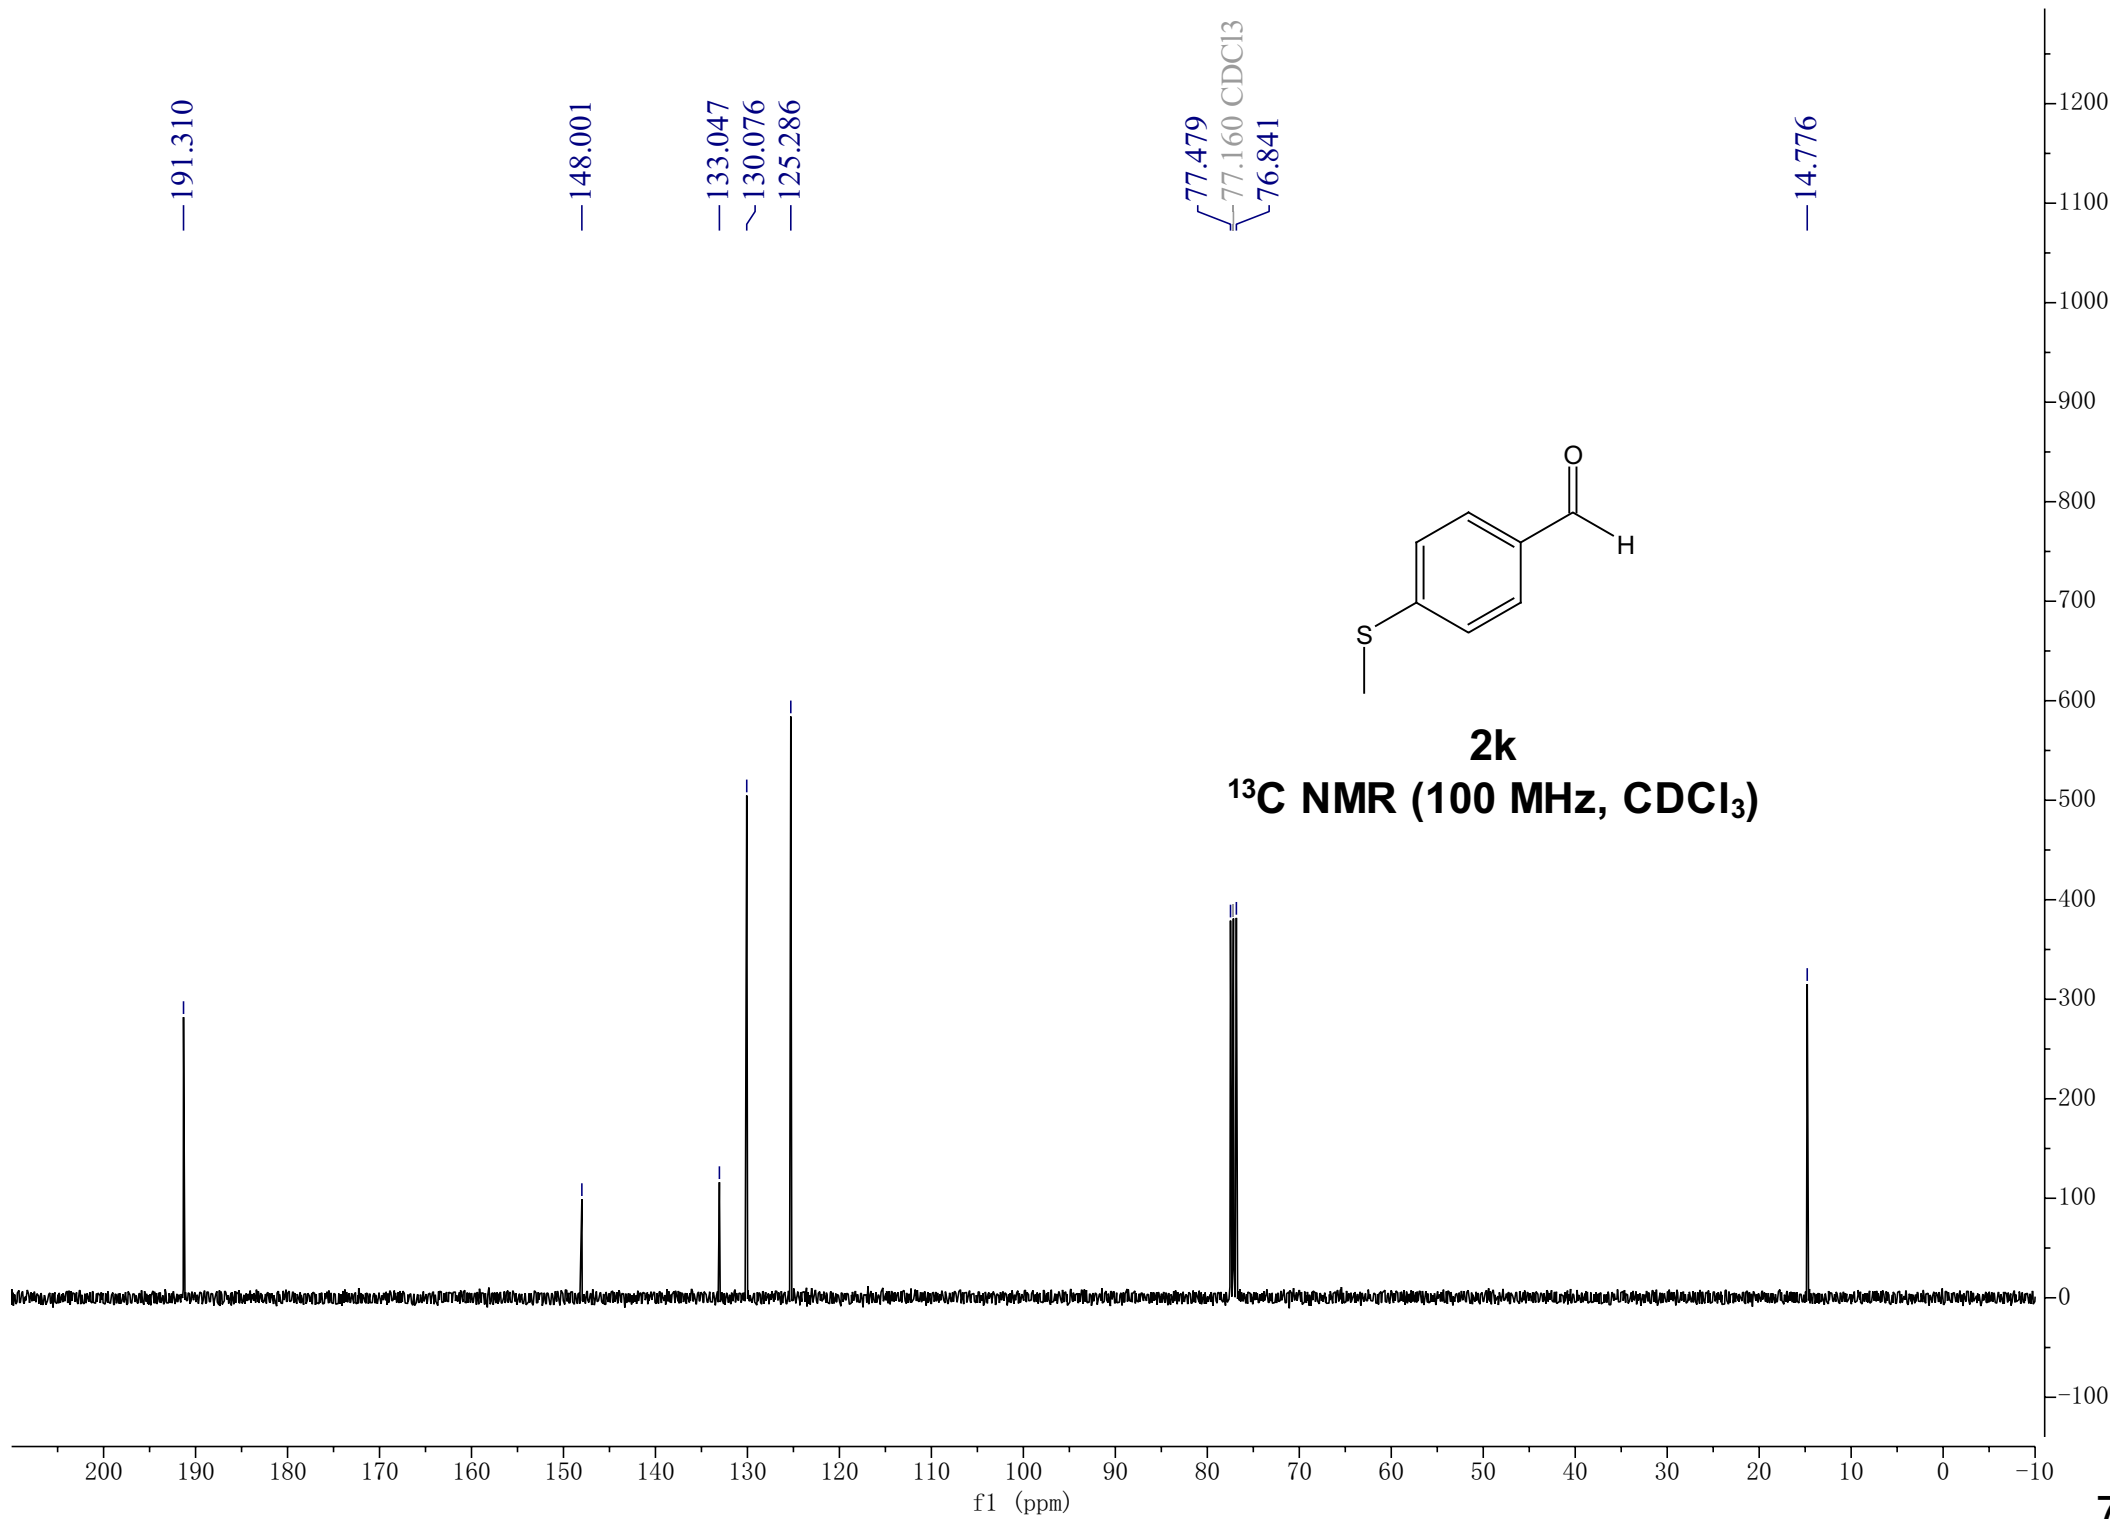

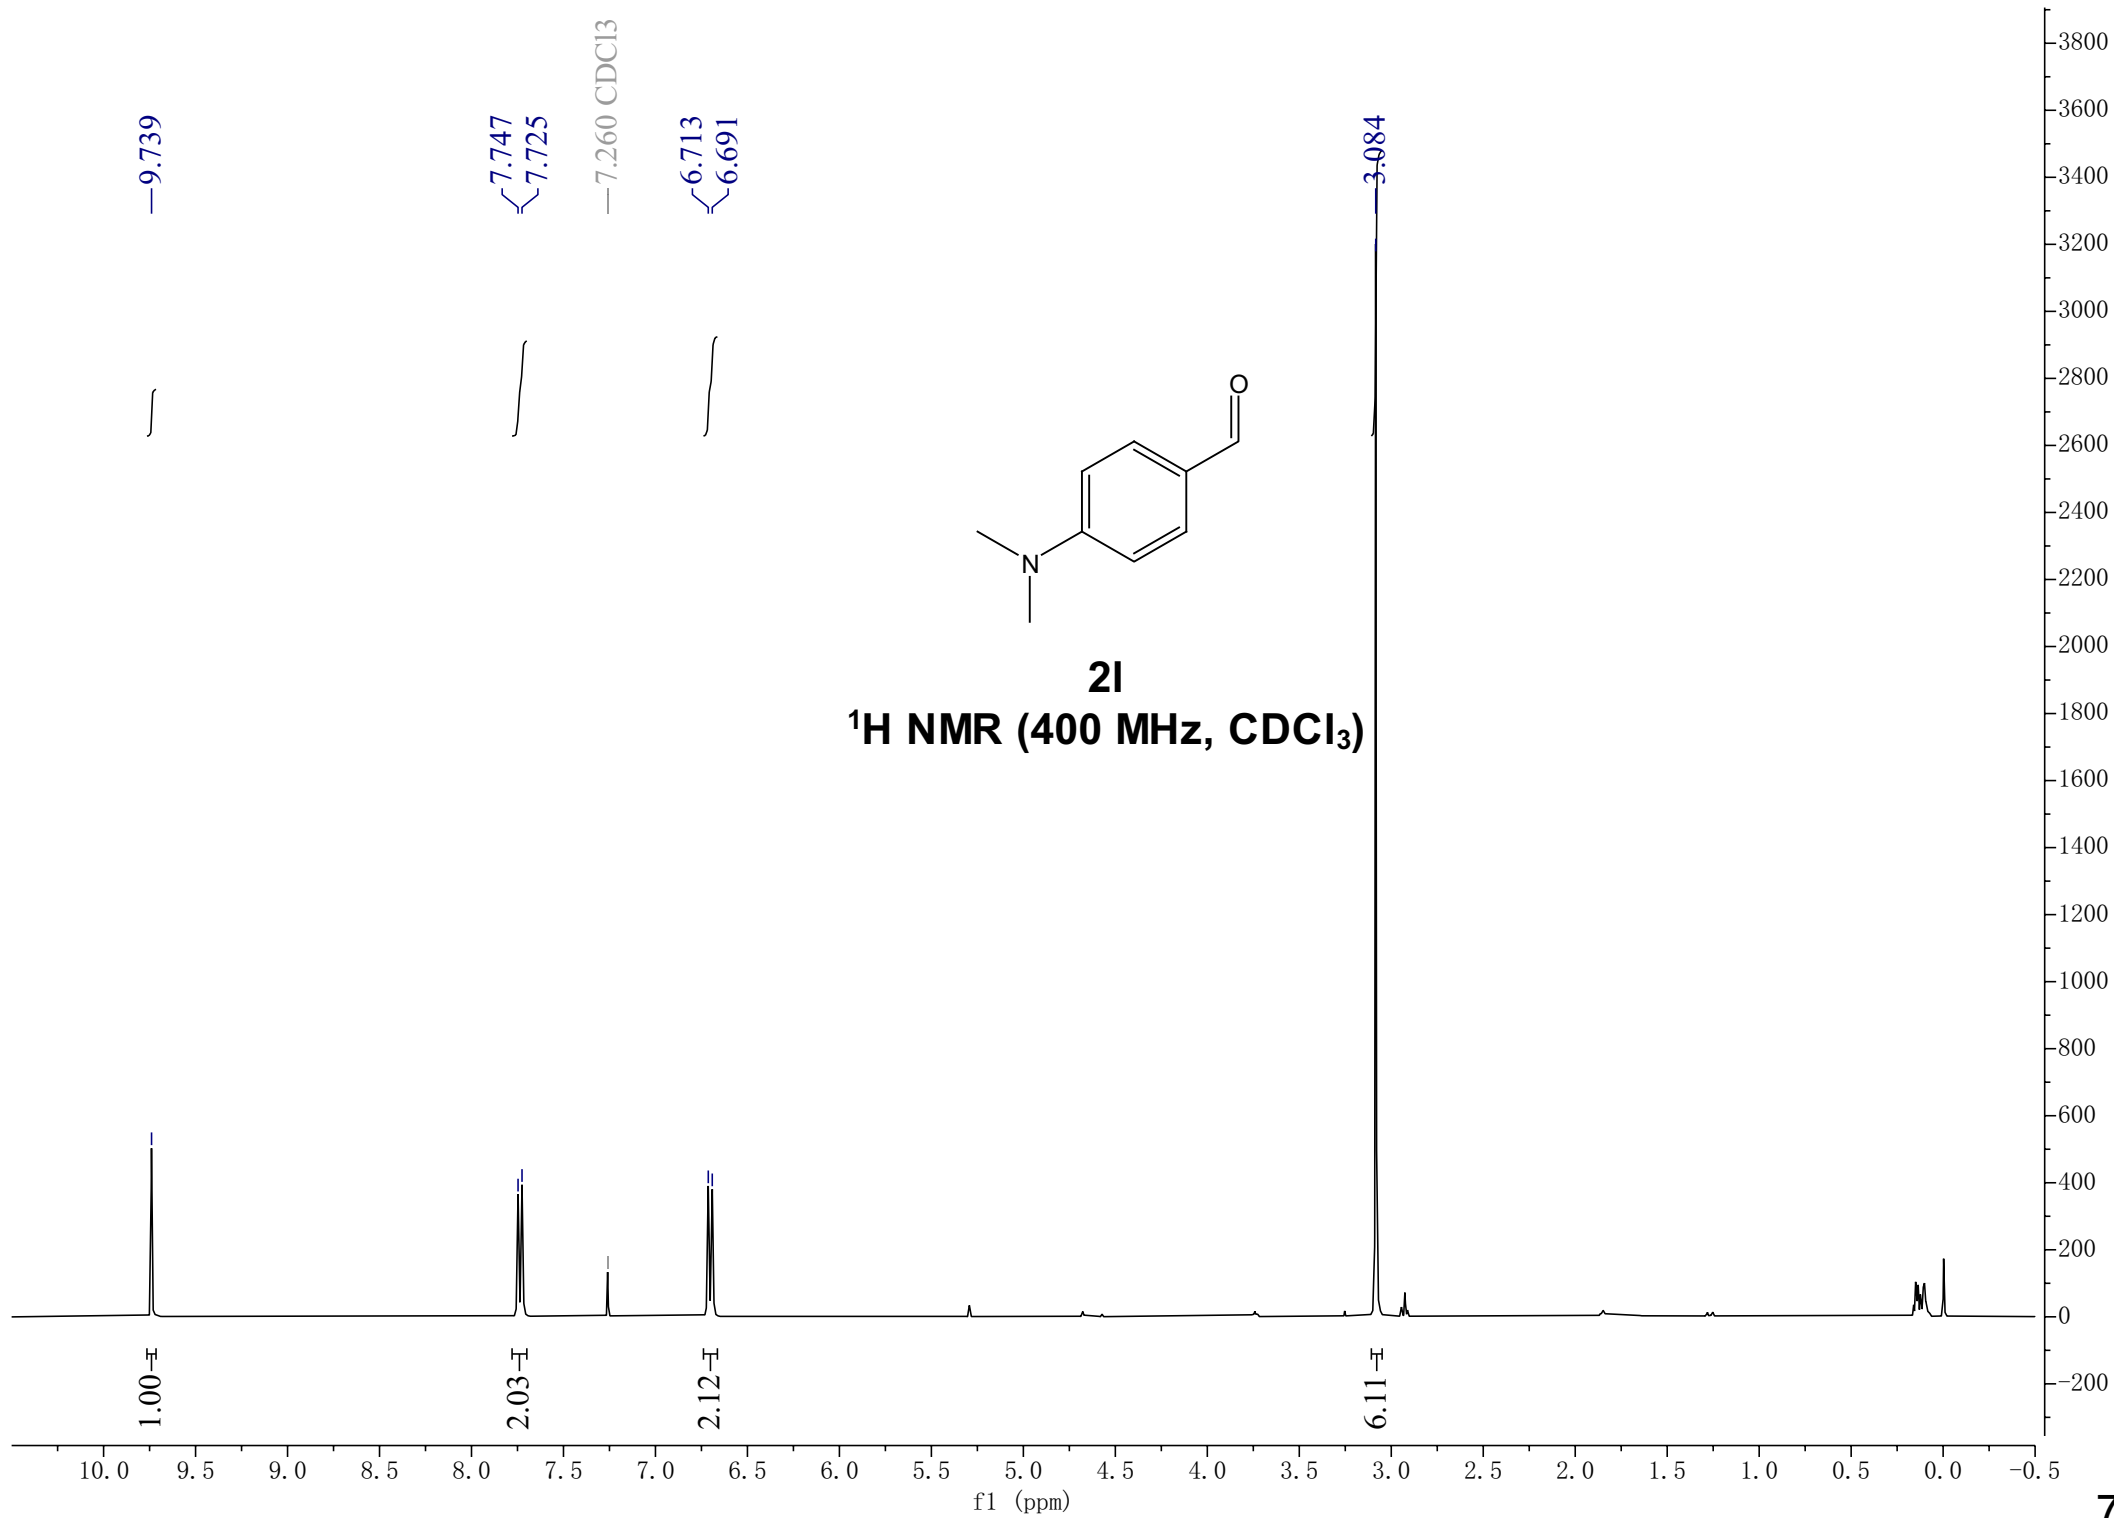

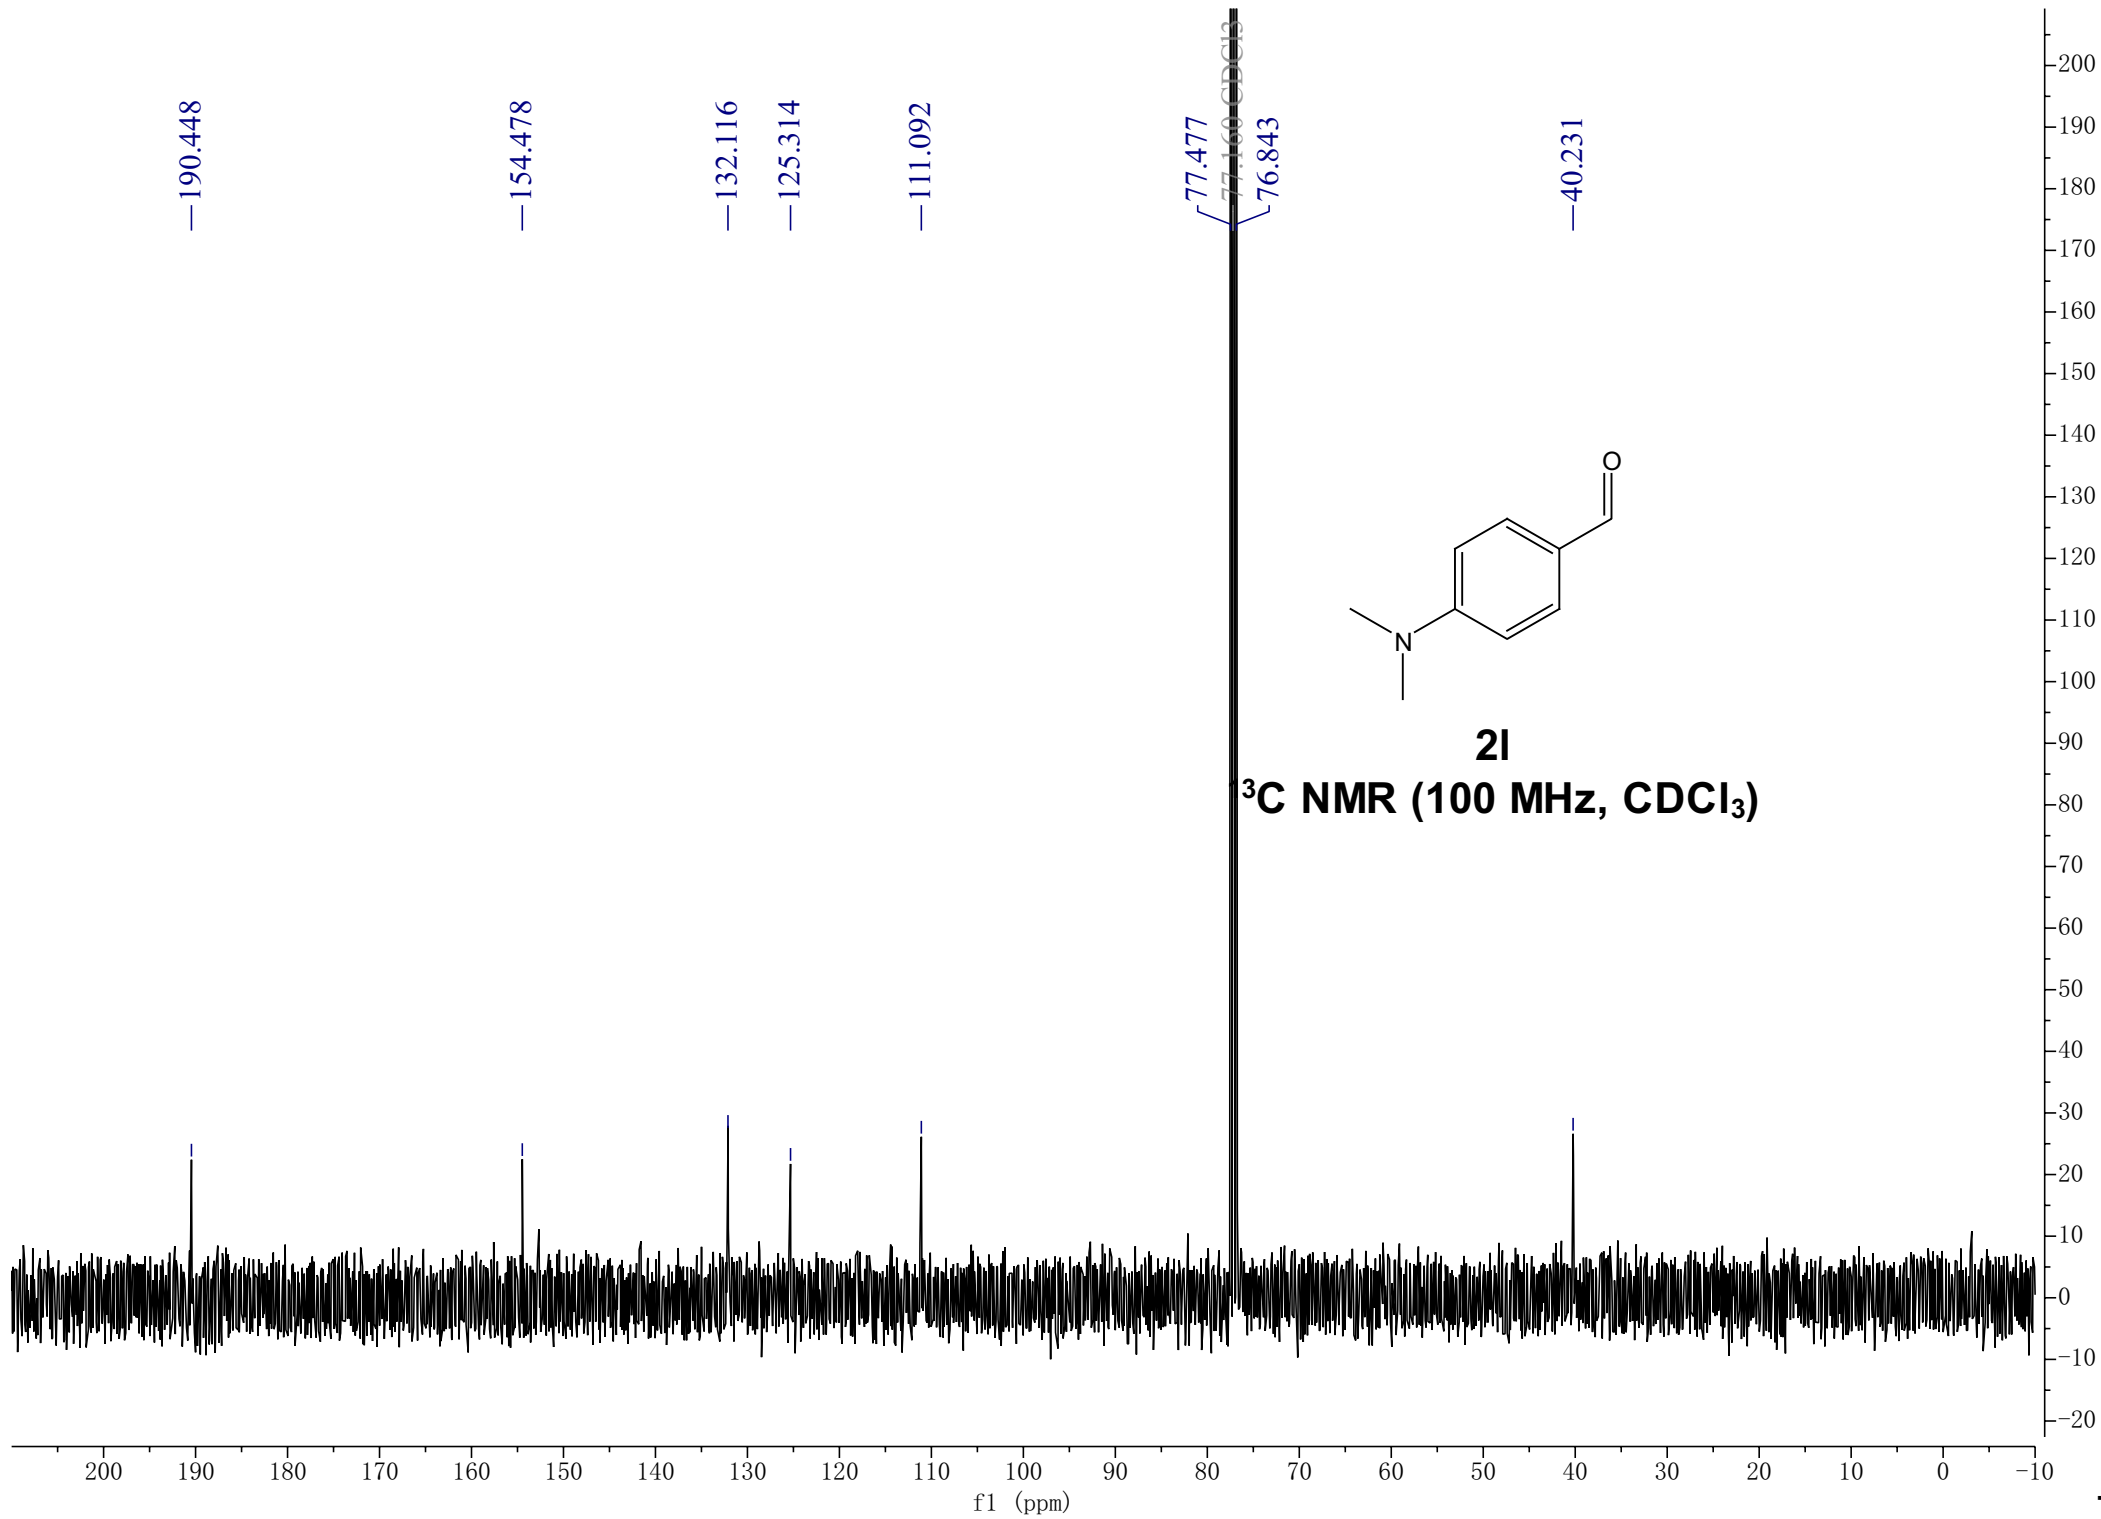

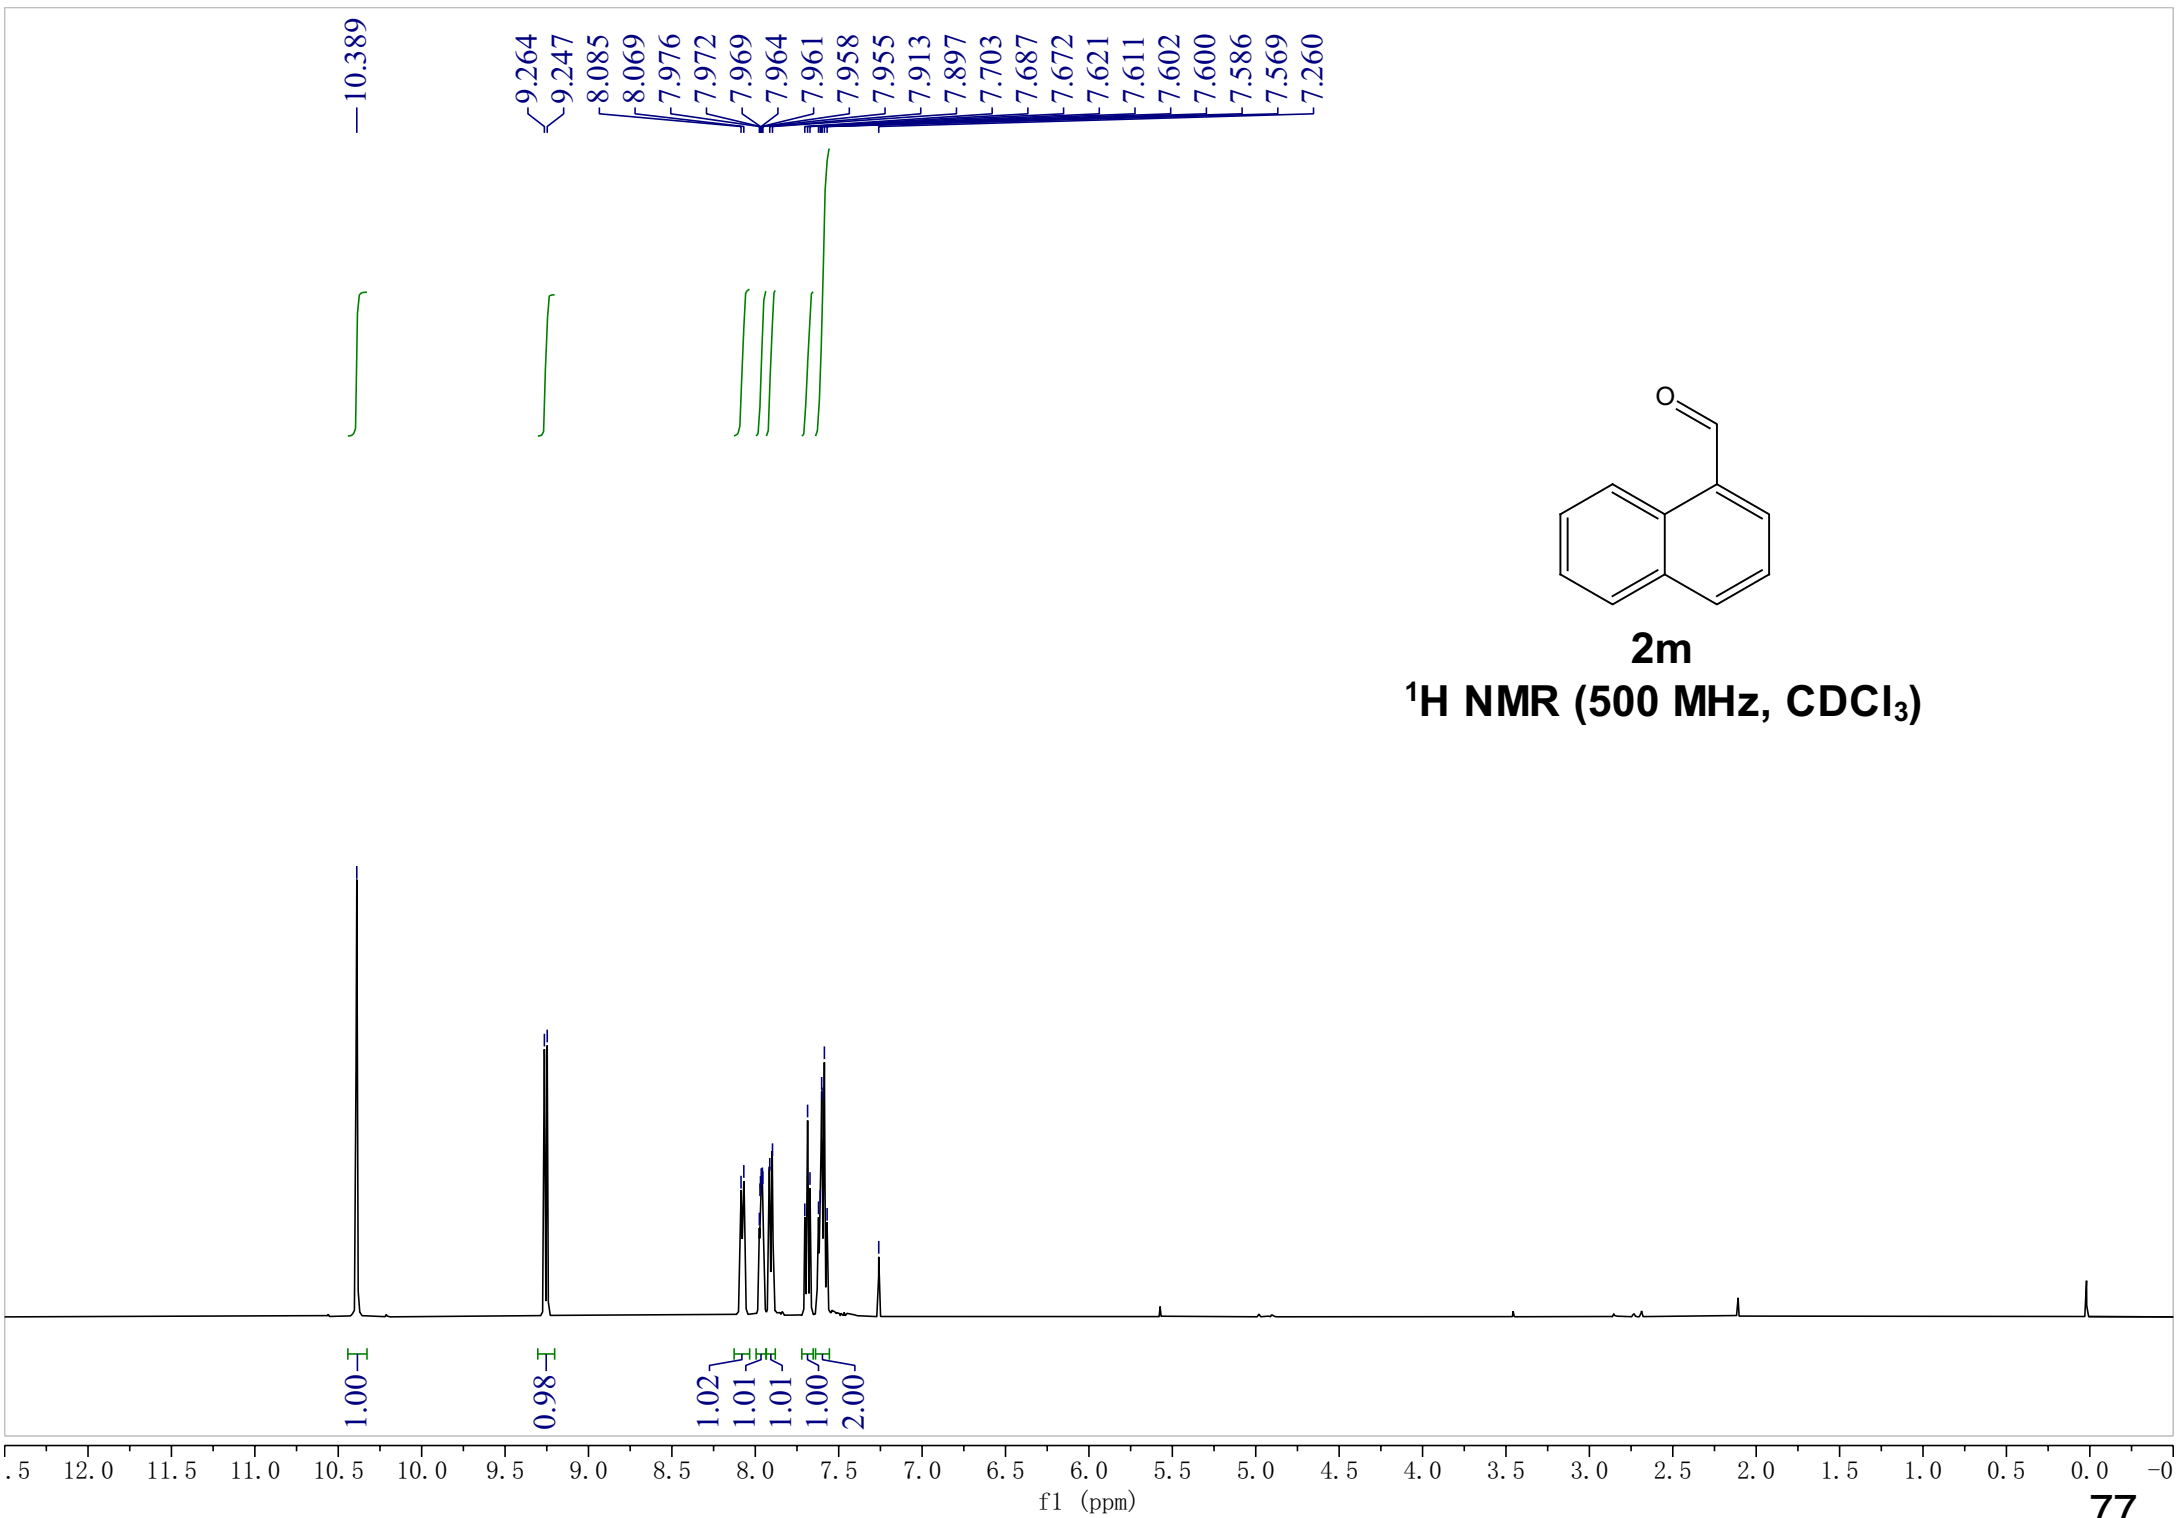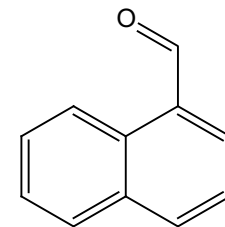

**2m**

**<sup>1</sup>H NMR (500 MHz, CDCl<sub>3</sub>)**

10.389  
9.264  
9.247  
8.085  
8.069  
7.976  
7.972  
7.969  
7.964  
7.961  
7.958  
7.955  
7.913  
7.897  
7.703  
7.687  
7.672  
7.621  
7.611  
7.602  
7.600  
7.586  
7.569  
7.260

1.00  
0.98  
1.02  
1.01  
1.01  
1.00  
2.00

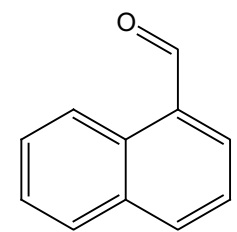

**2m**

**<sup>13</sup>C NMR (125 MHz, CDCl<sub>3</sub>)**

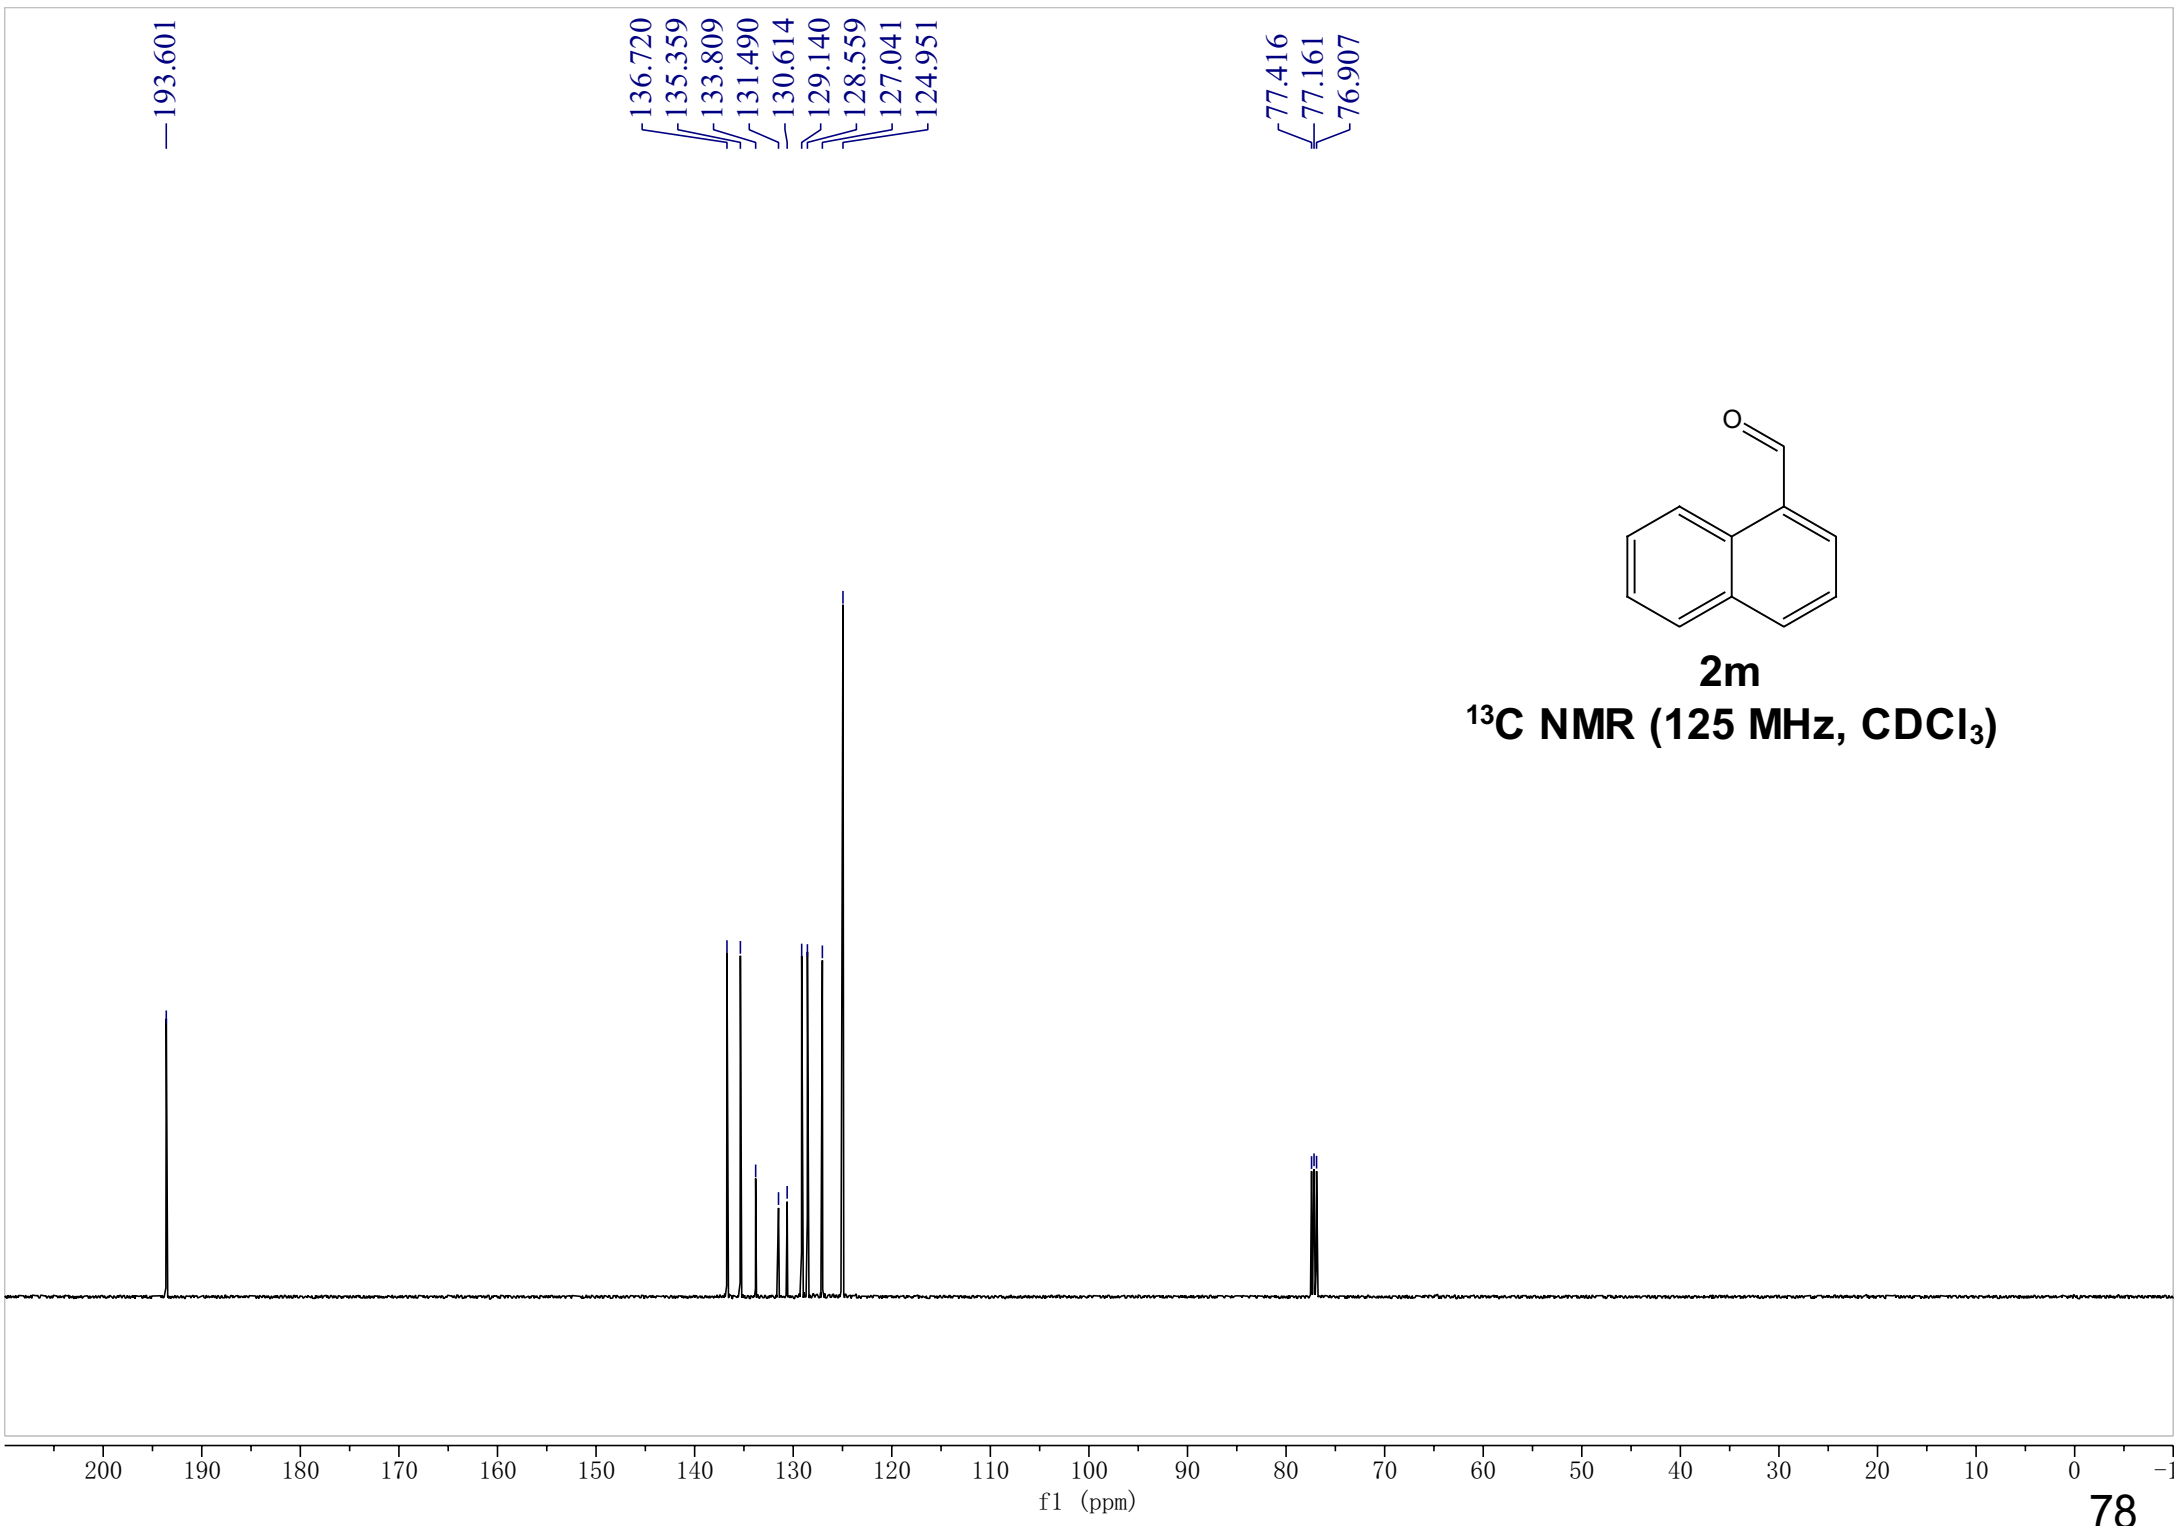

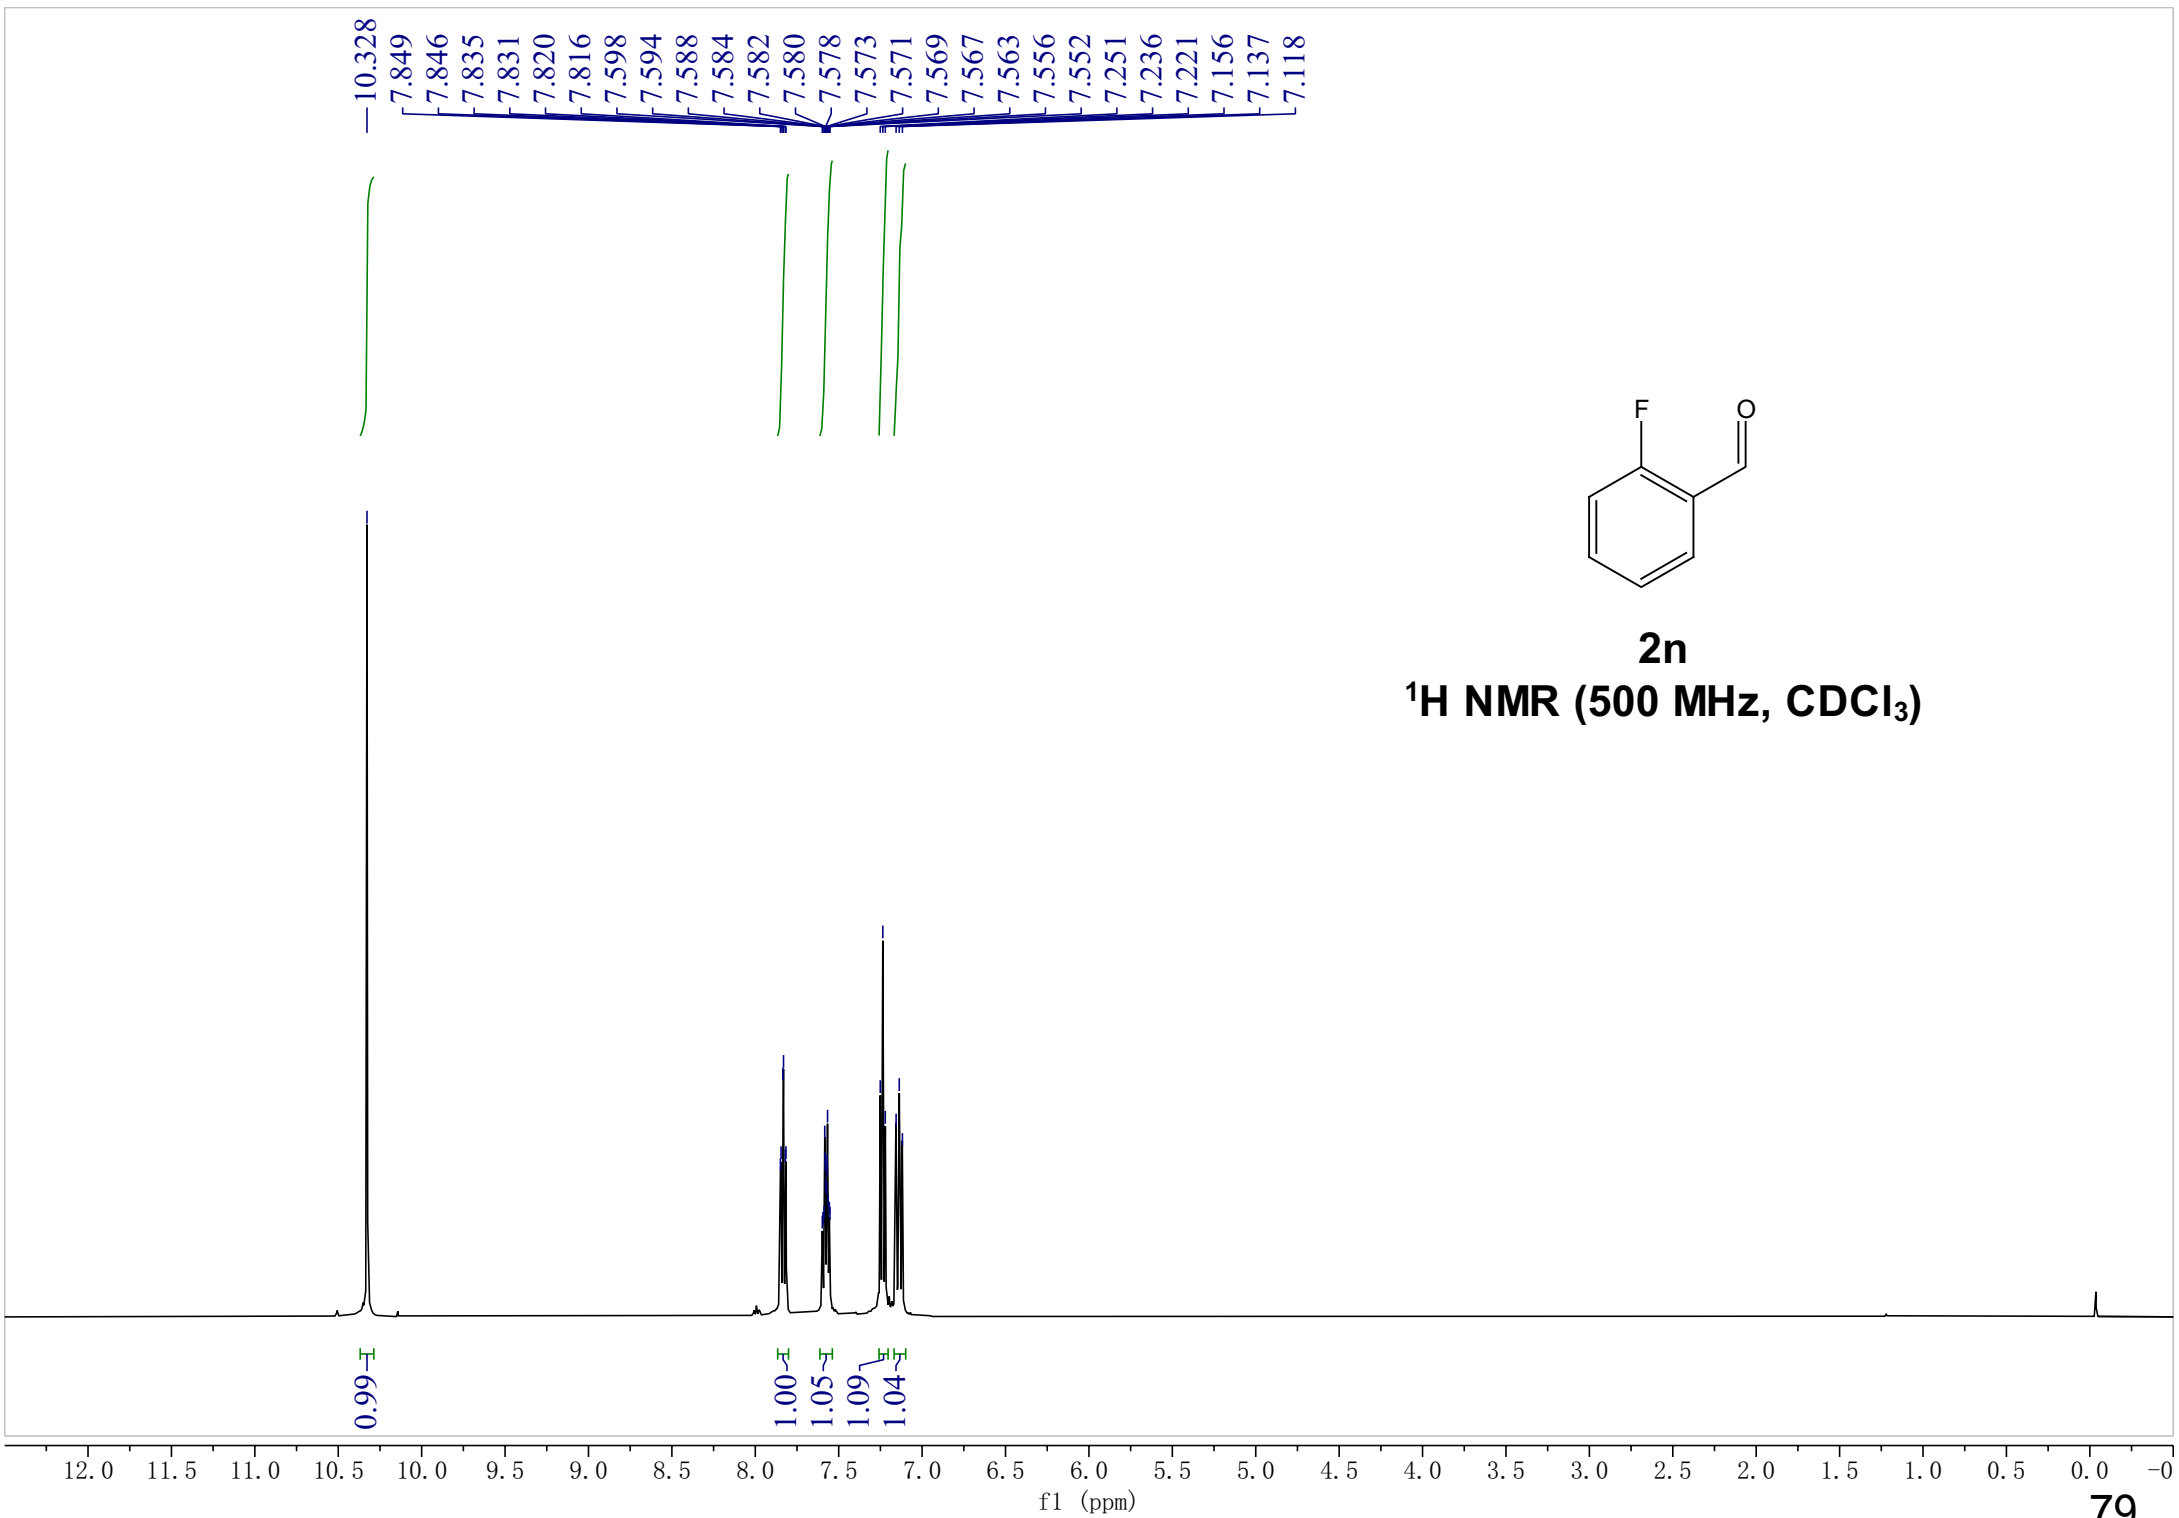



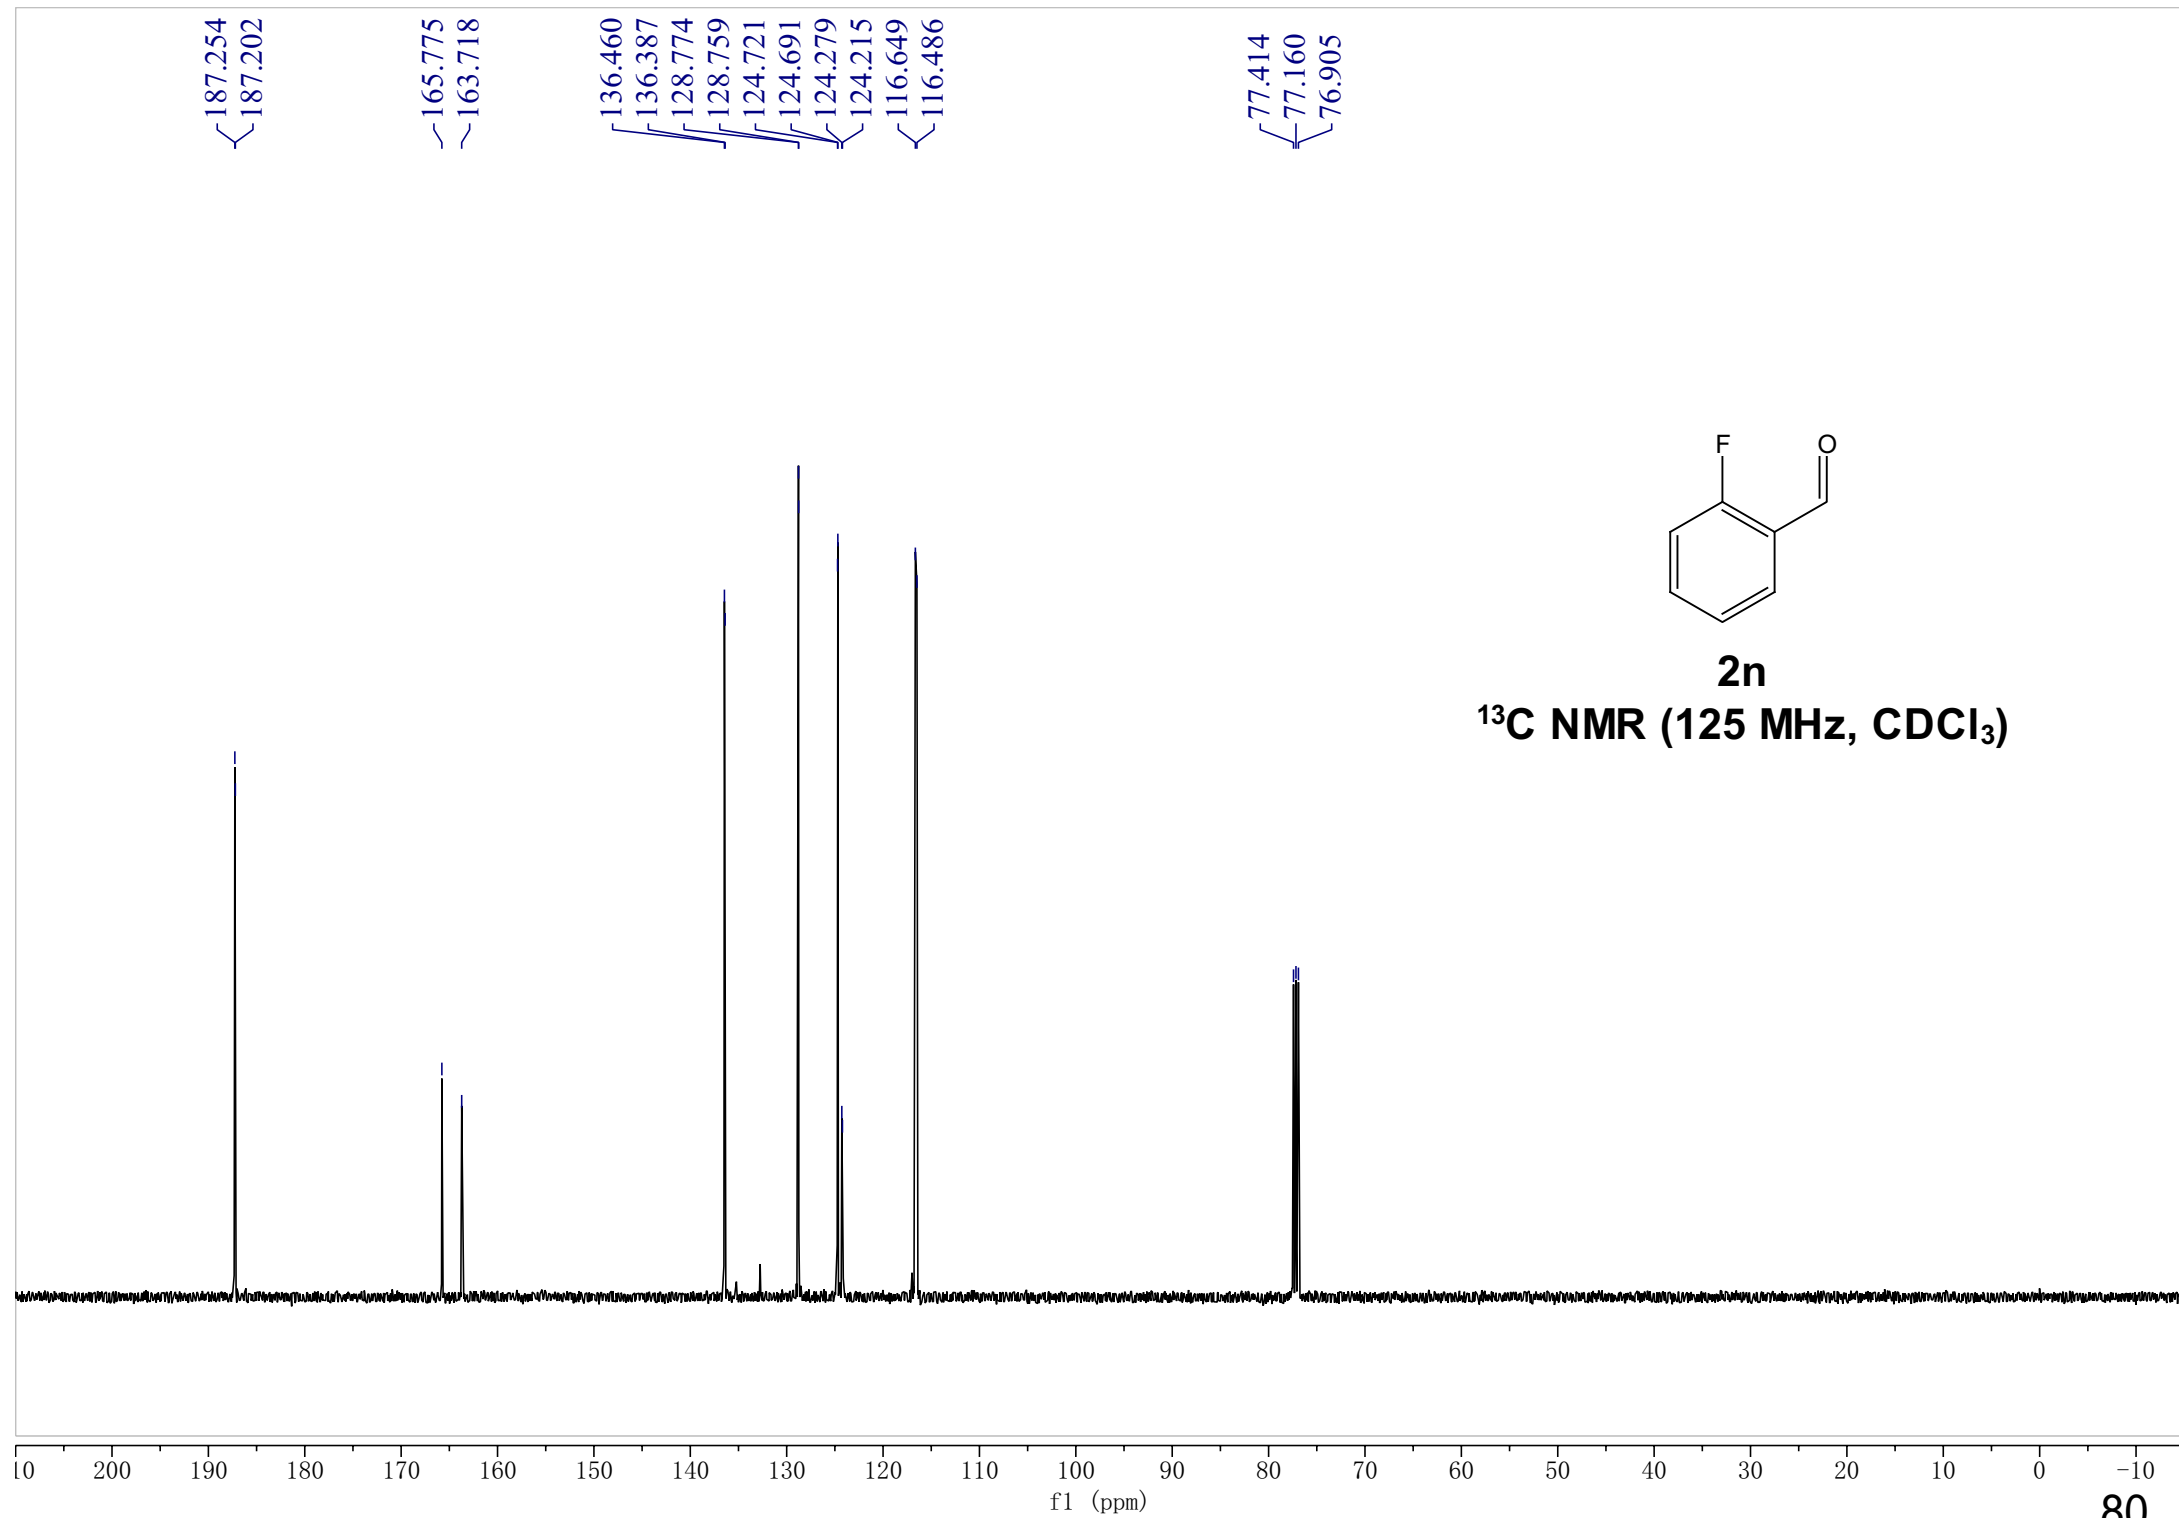

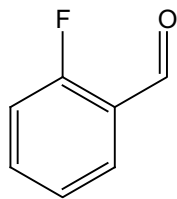

**2n**

**$^{19}\text{F}$  NMR (470 MHz,  $\text{CDCl}_3$ )**

--121.999

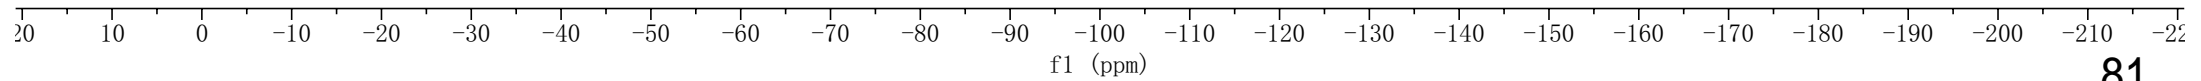

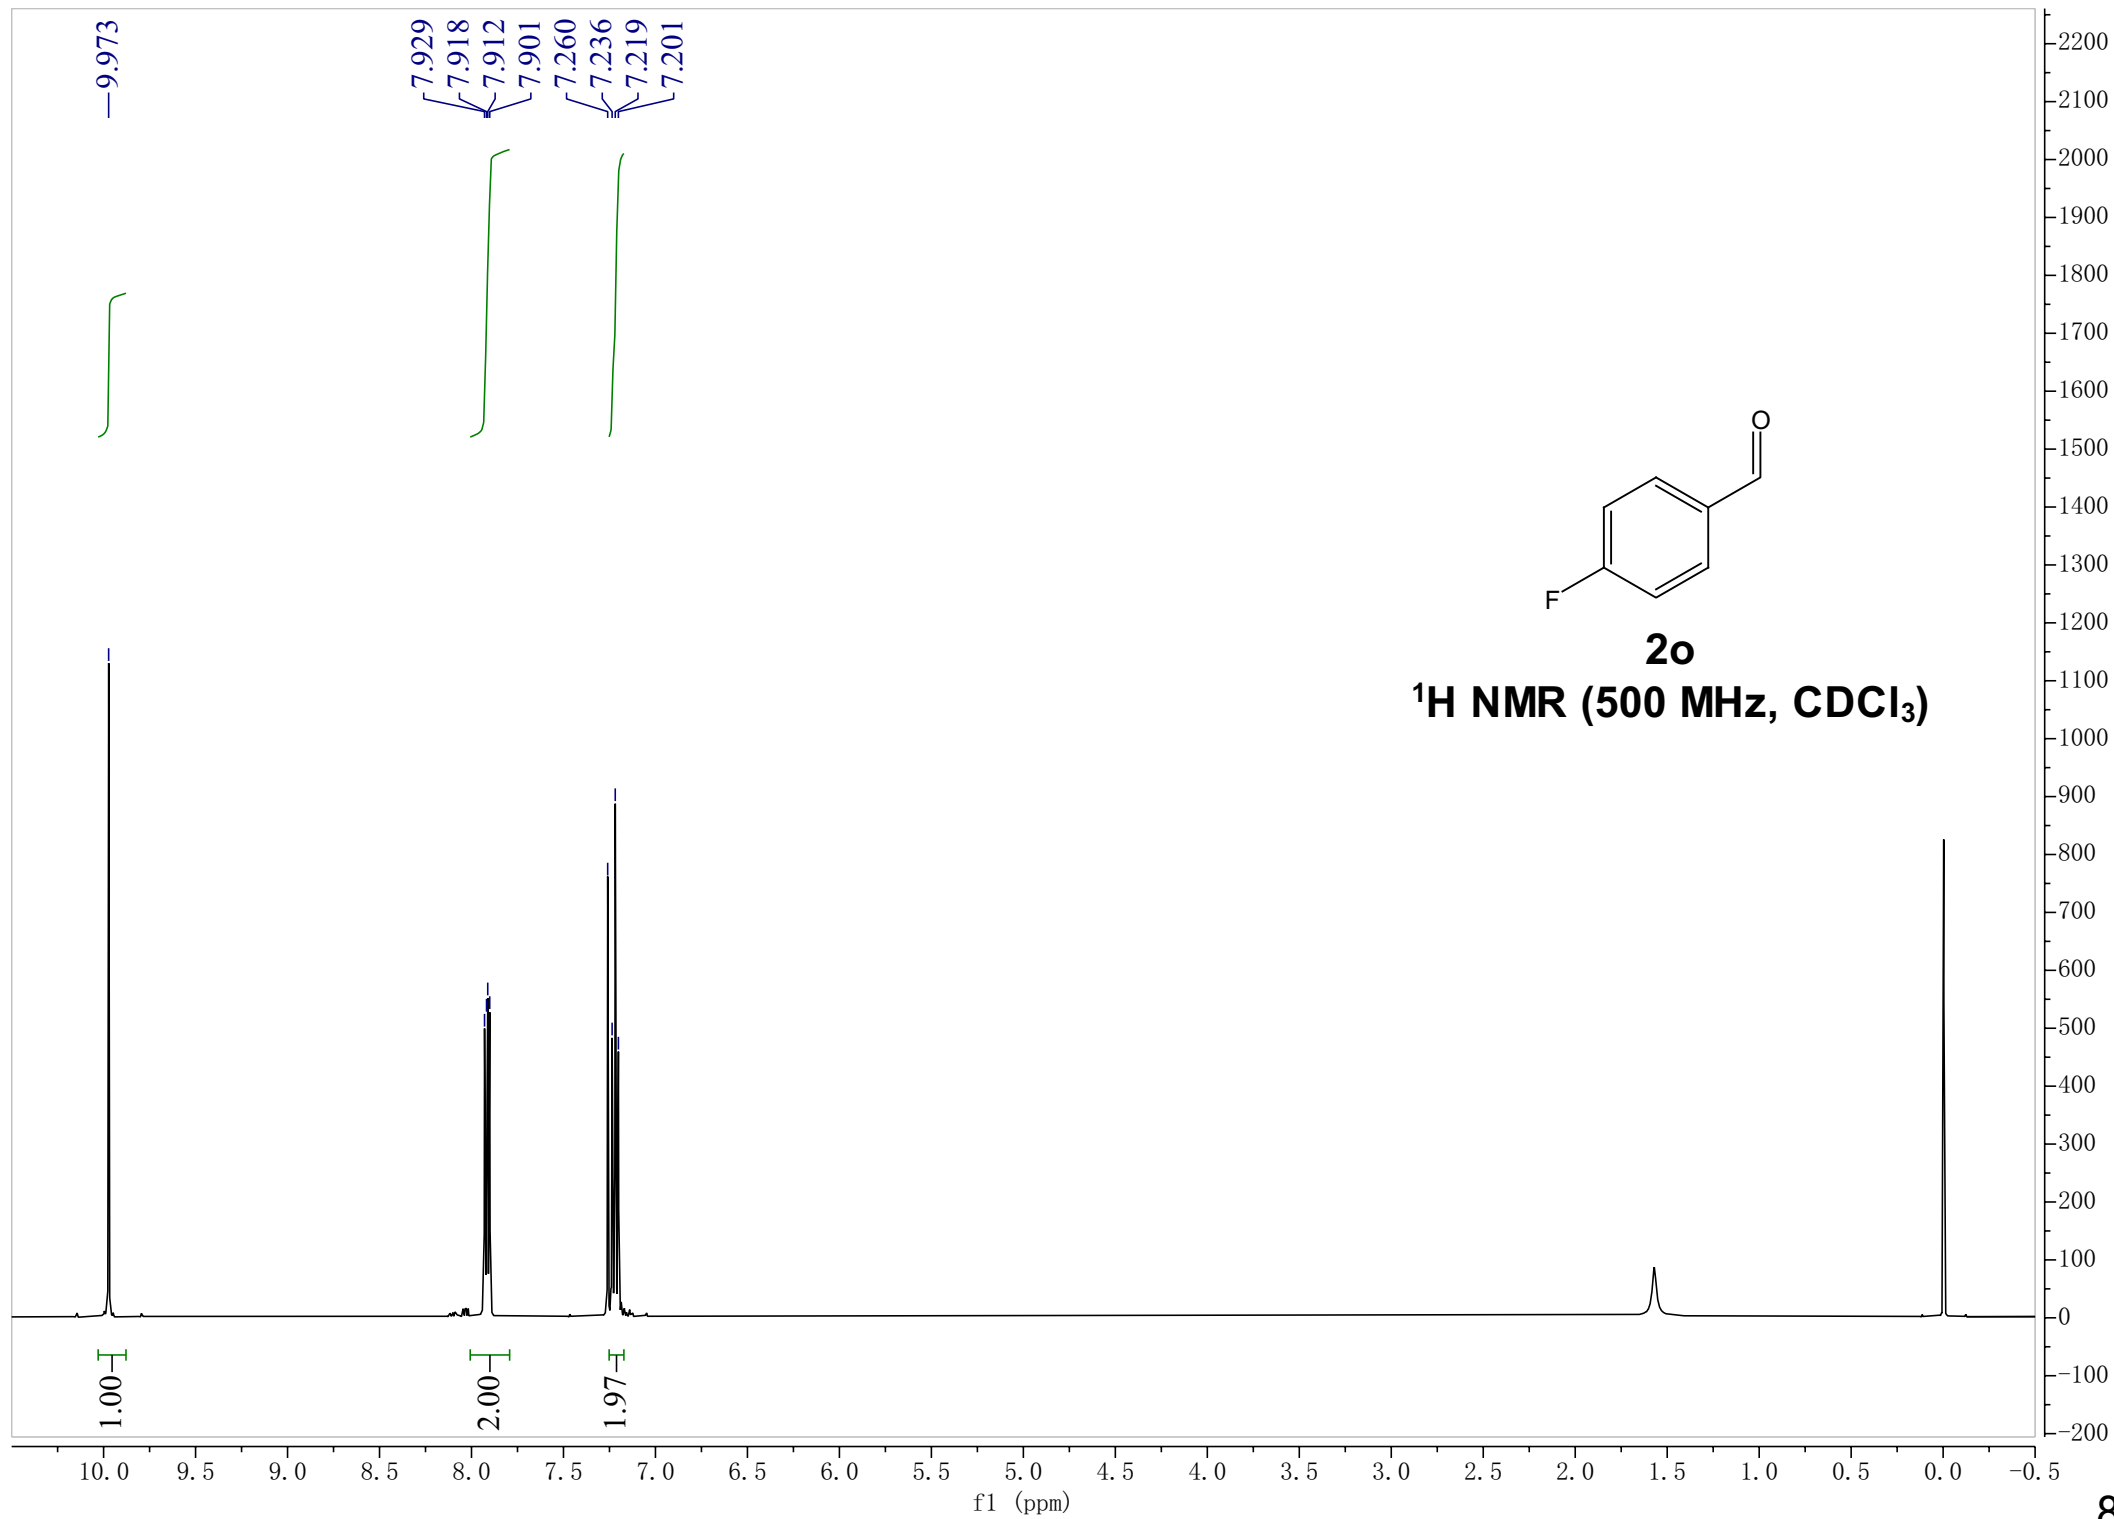

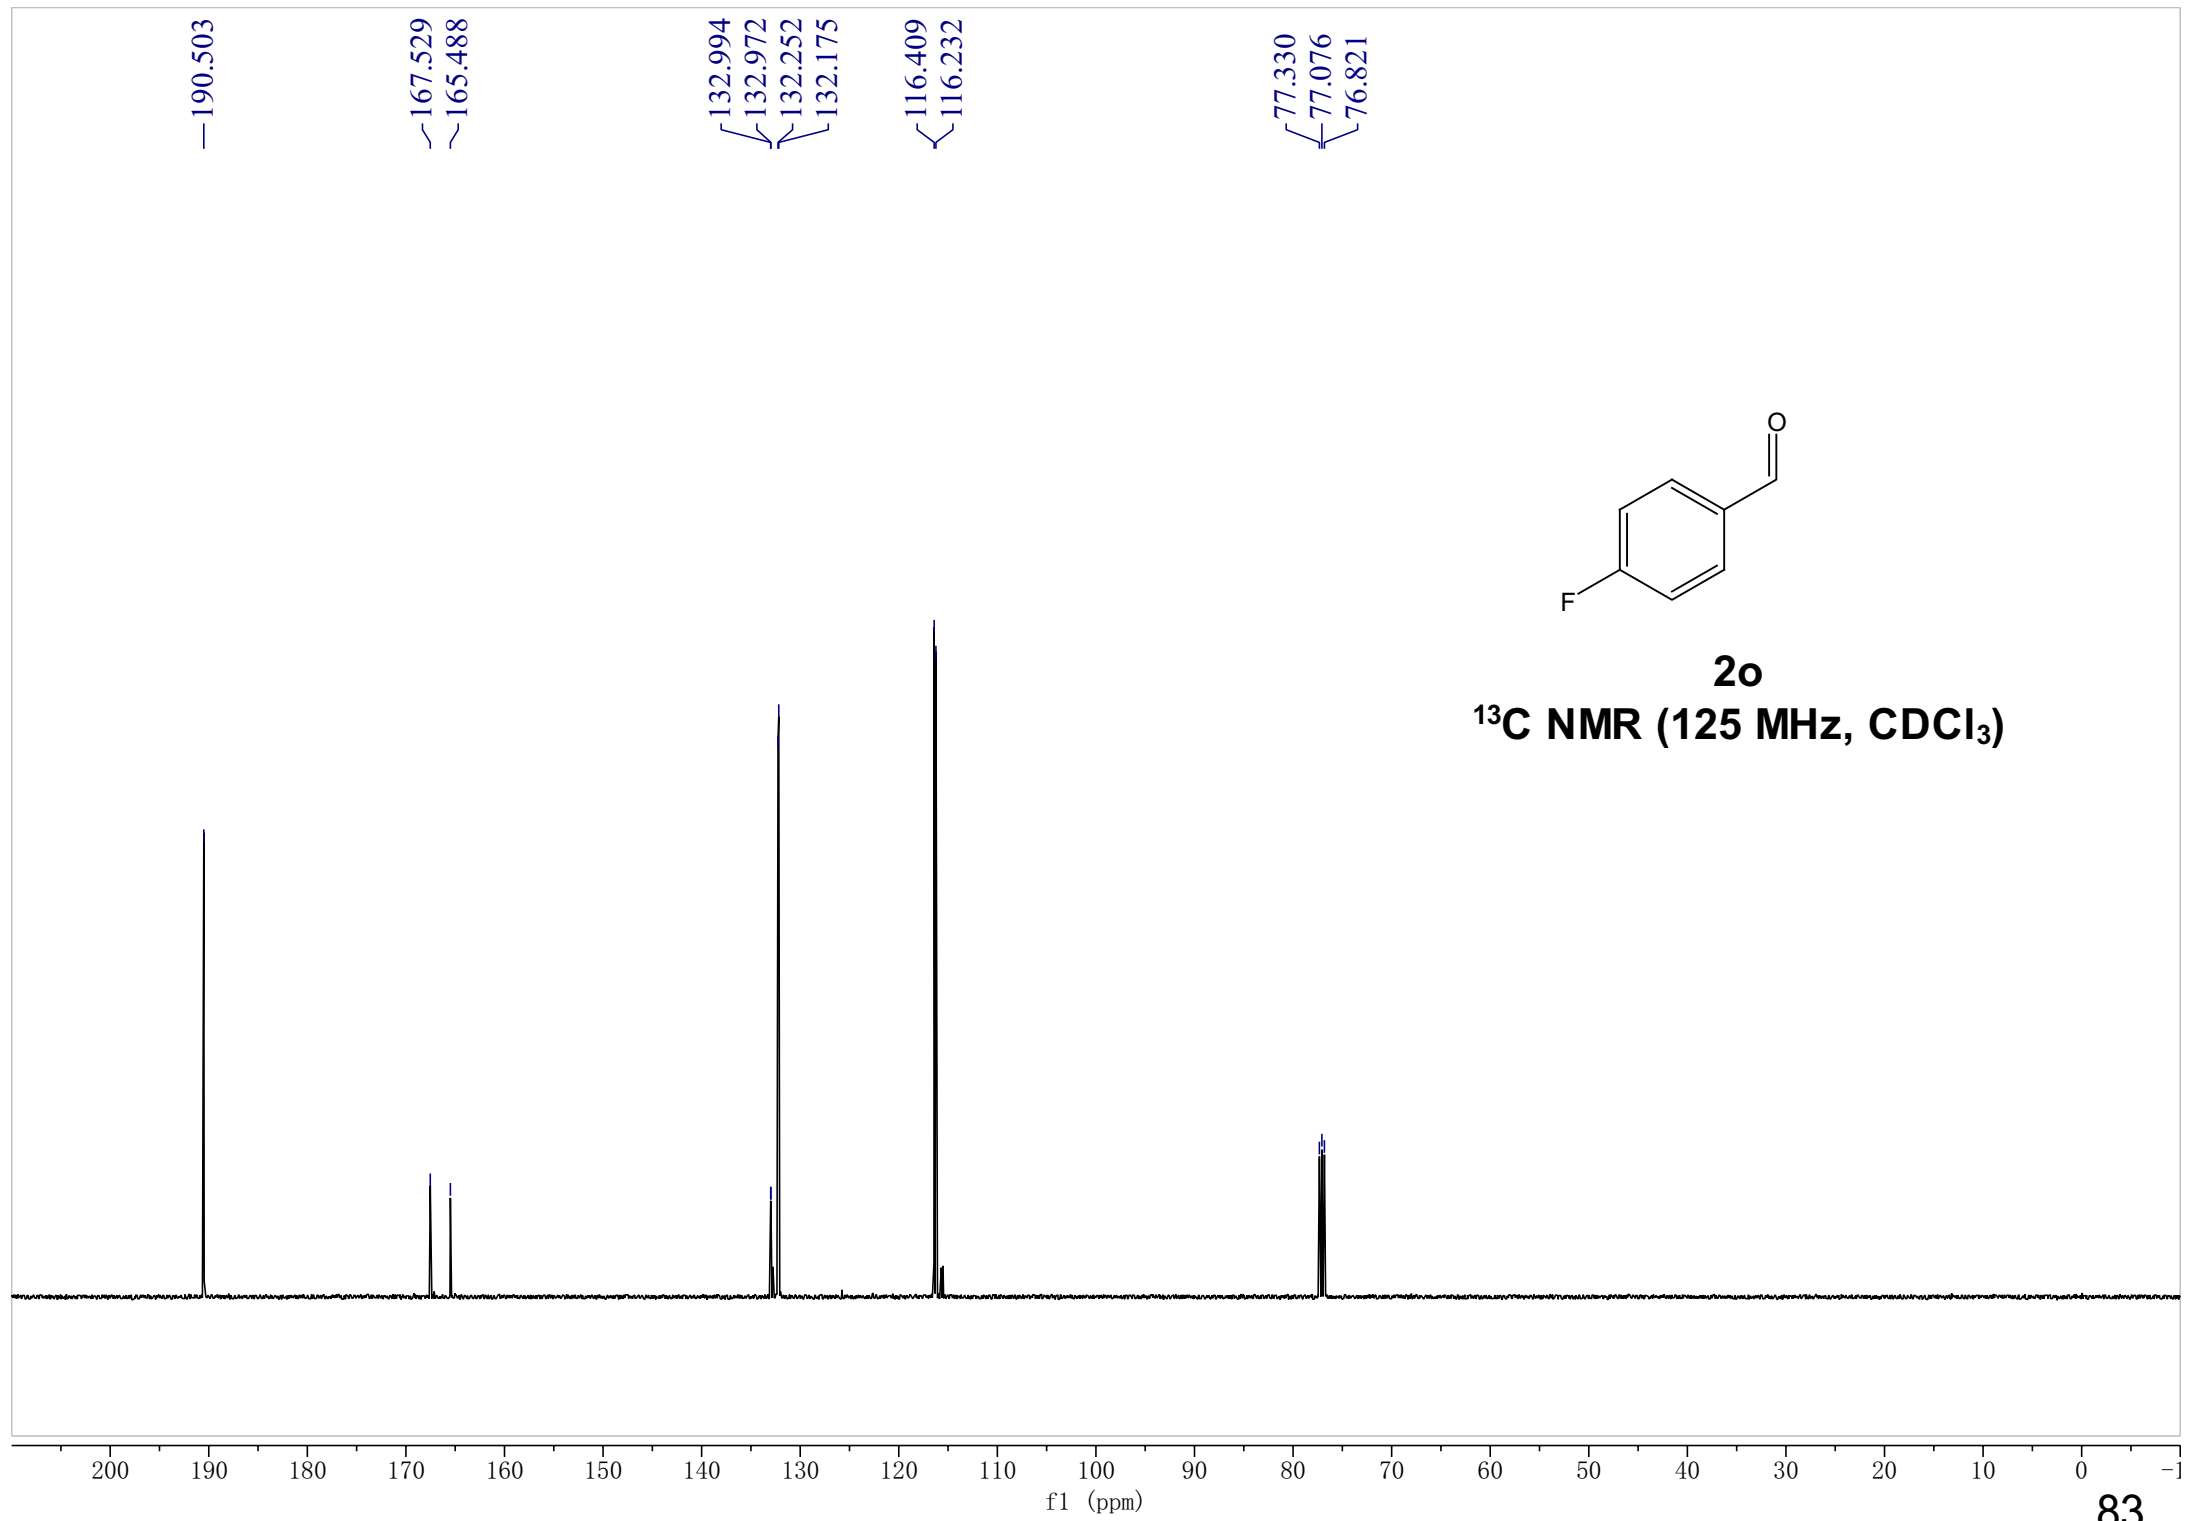

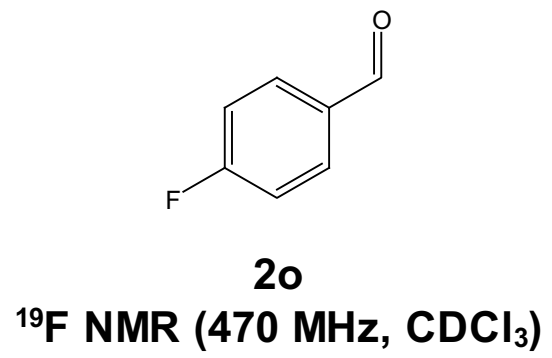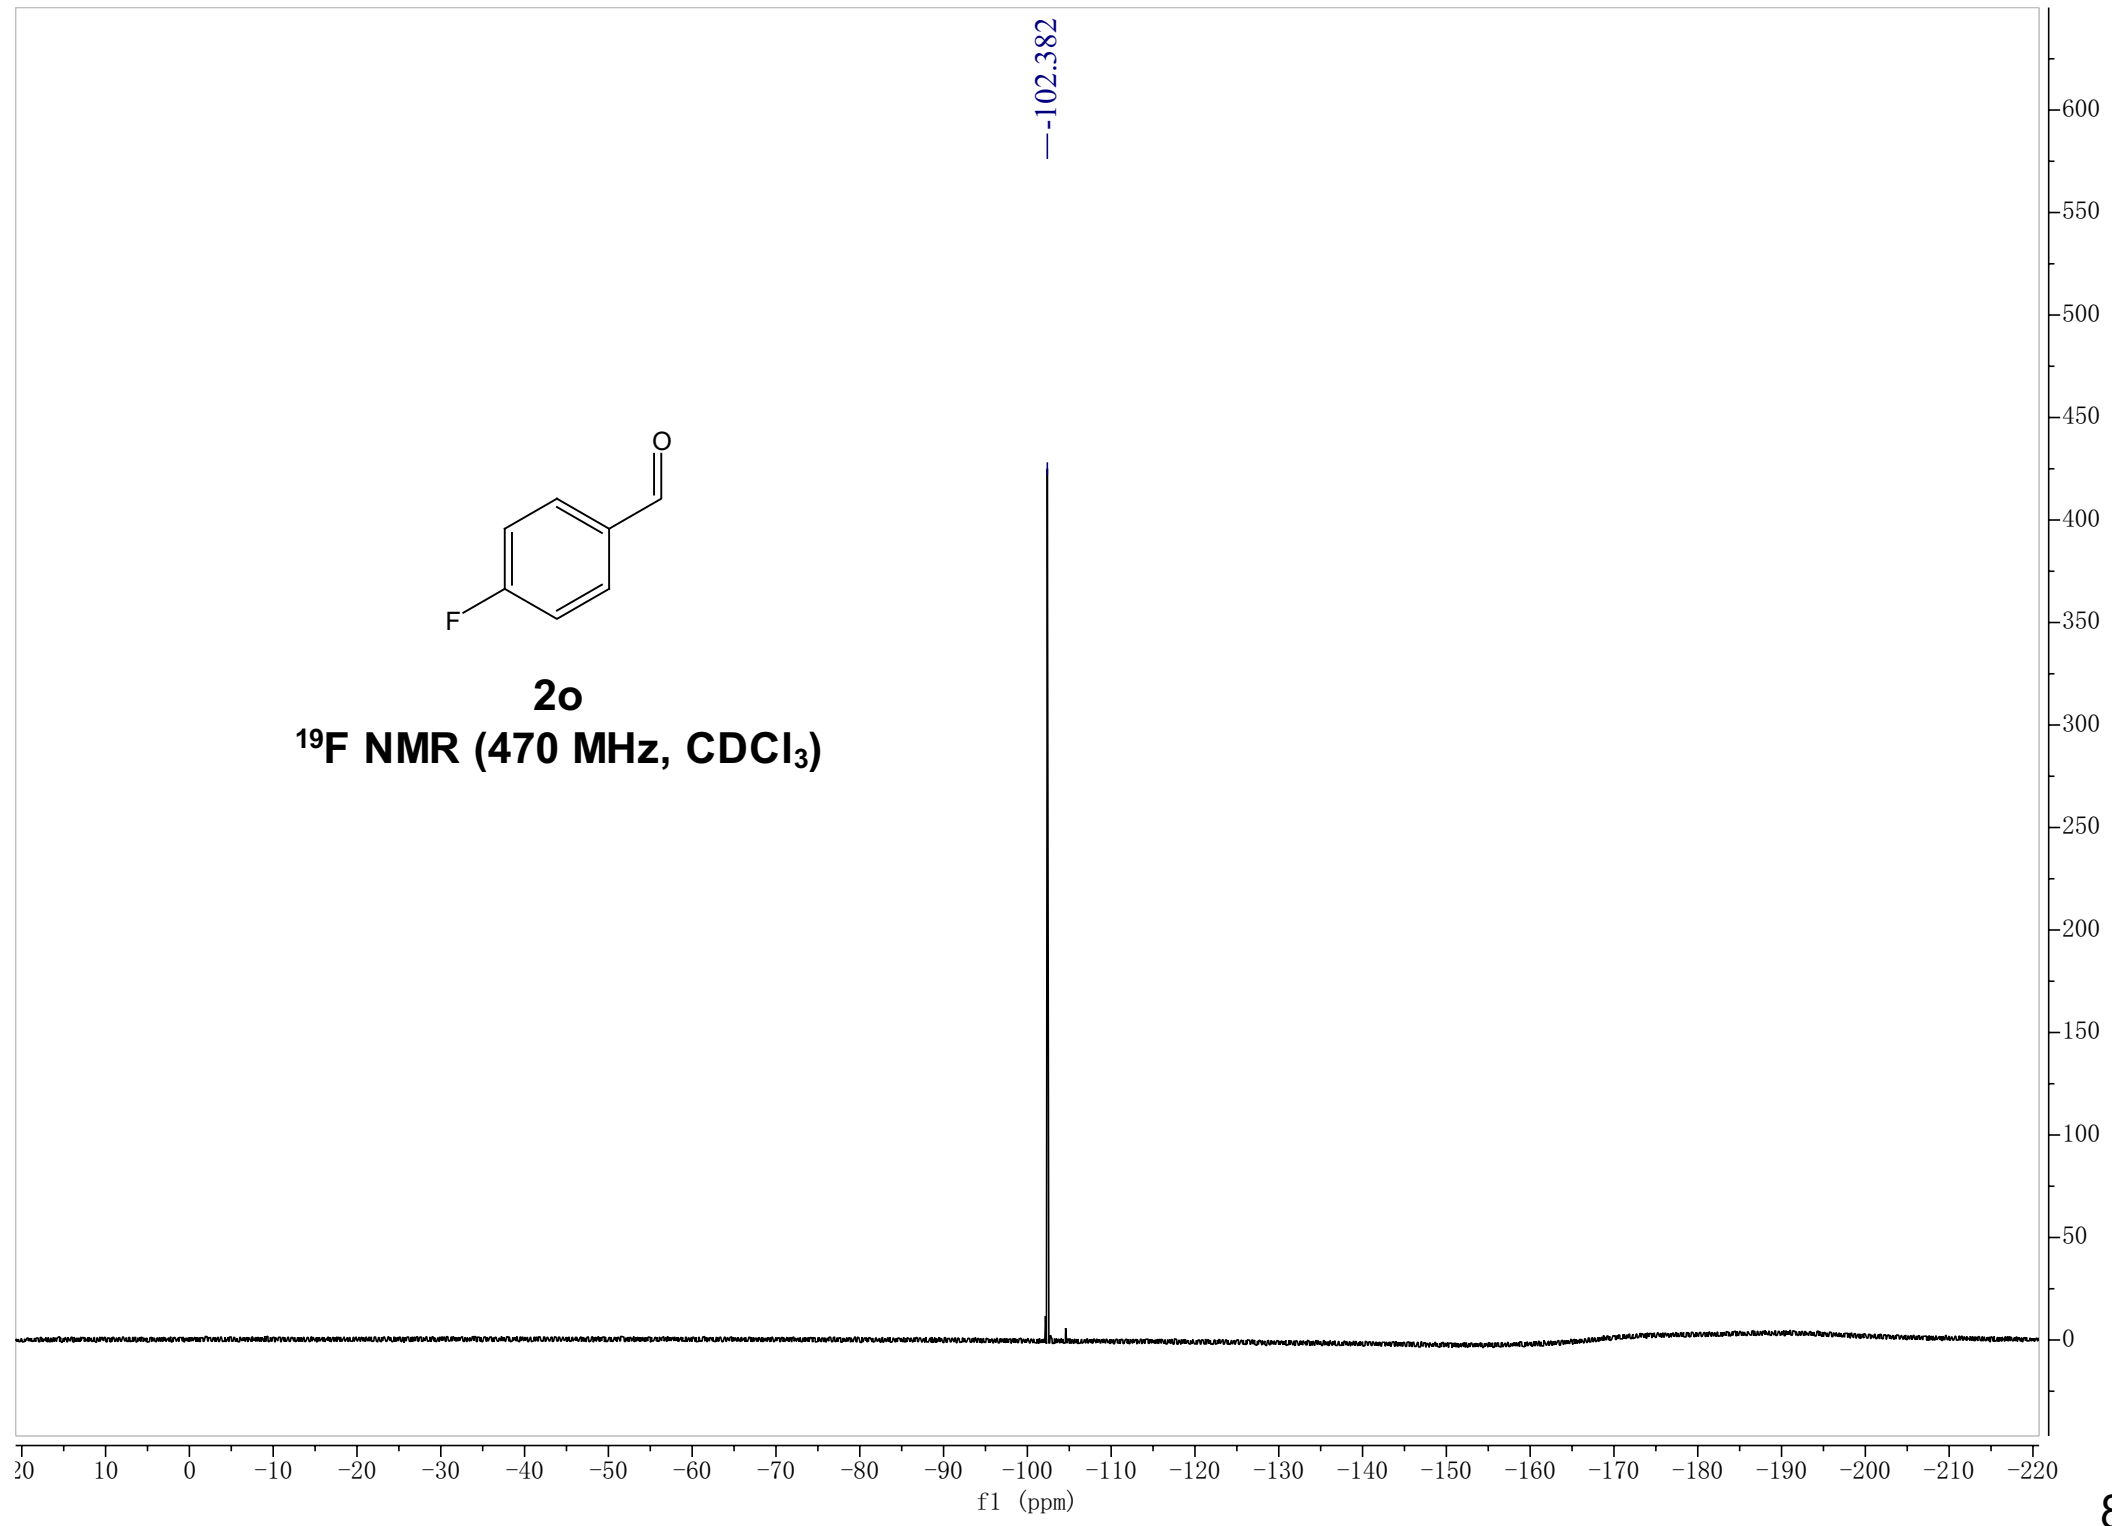

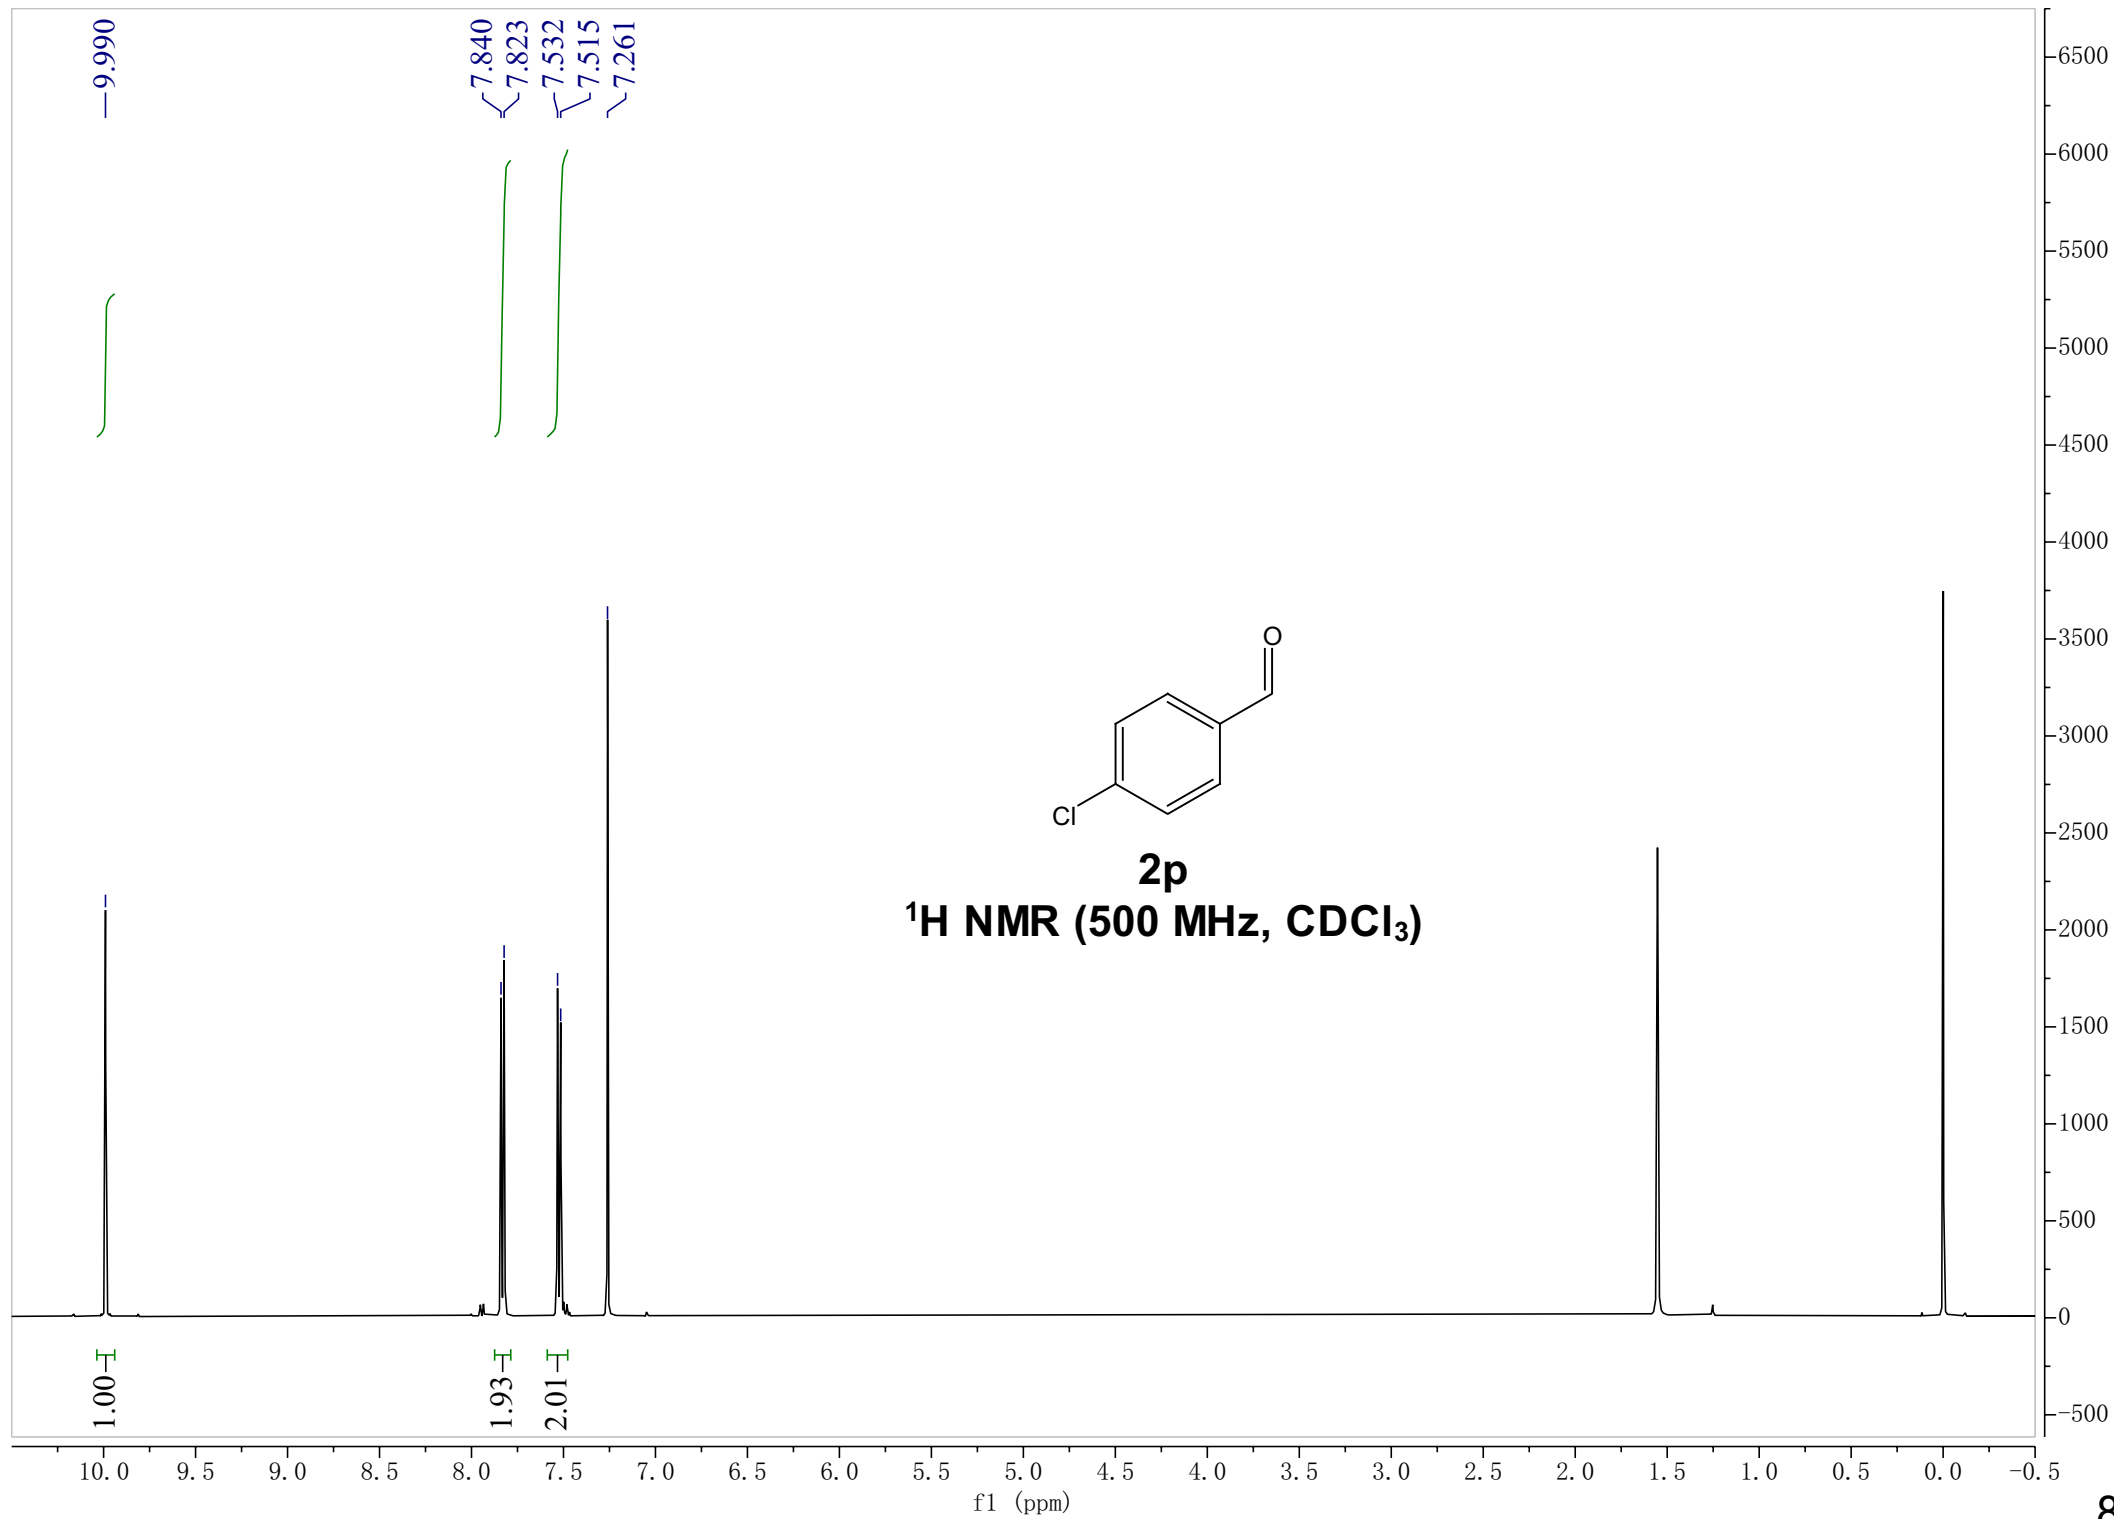

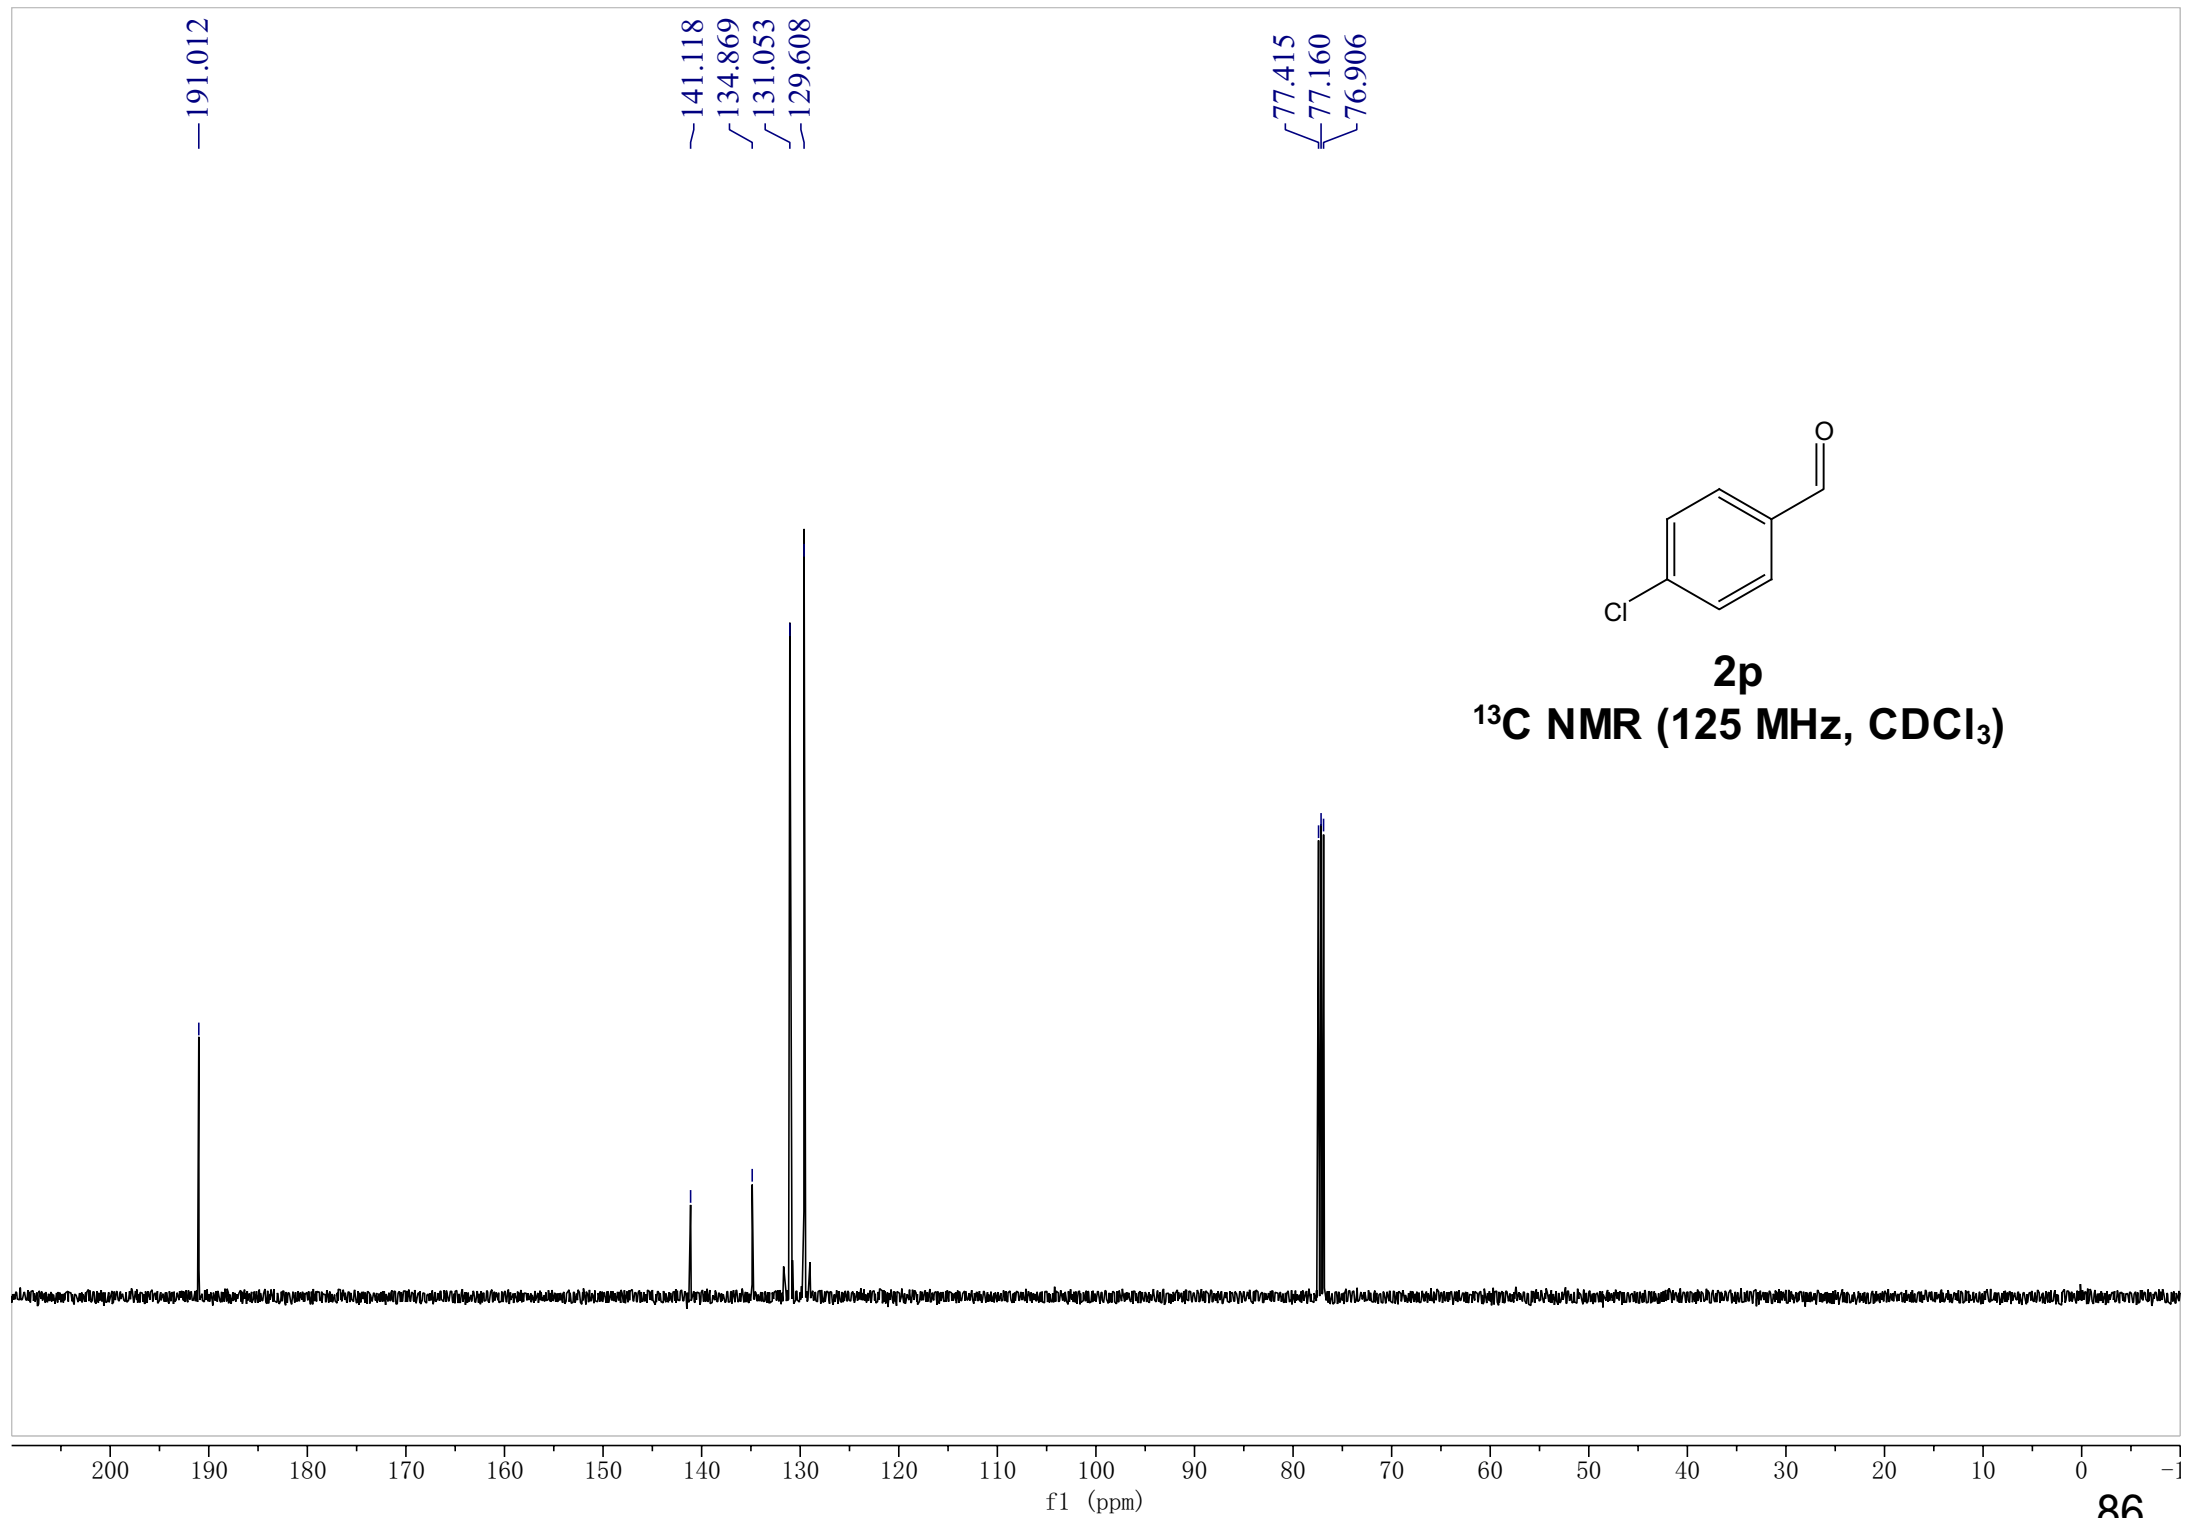

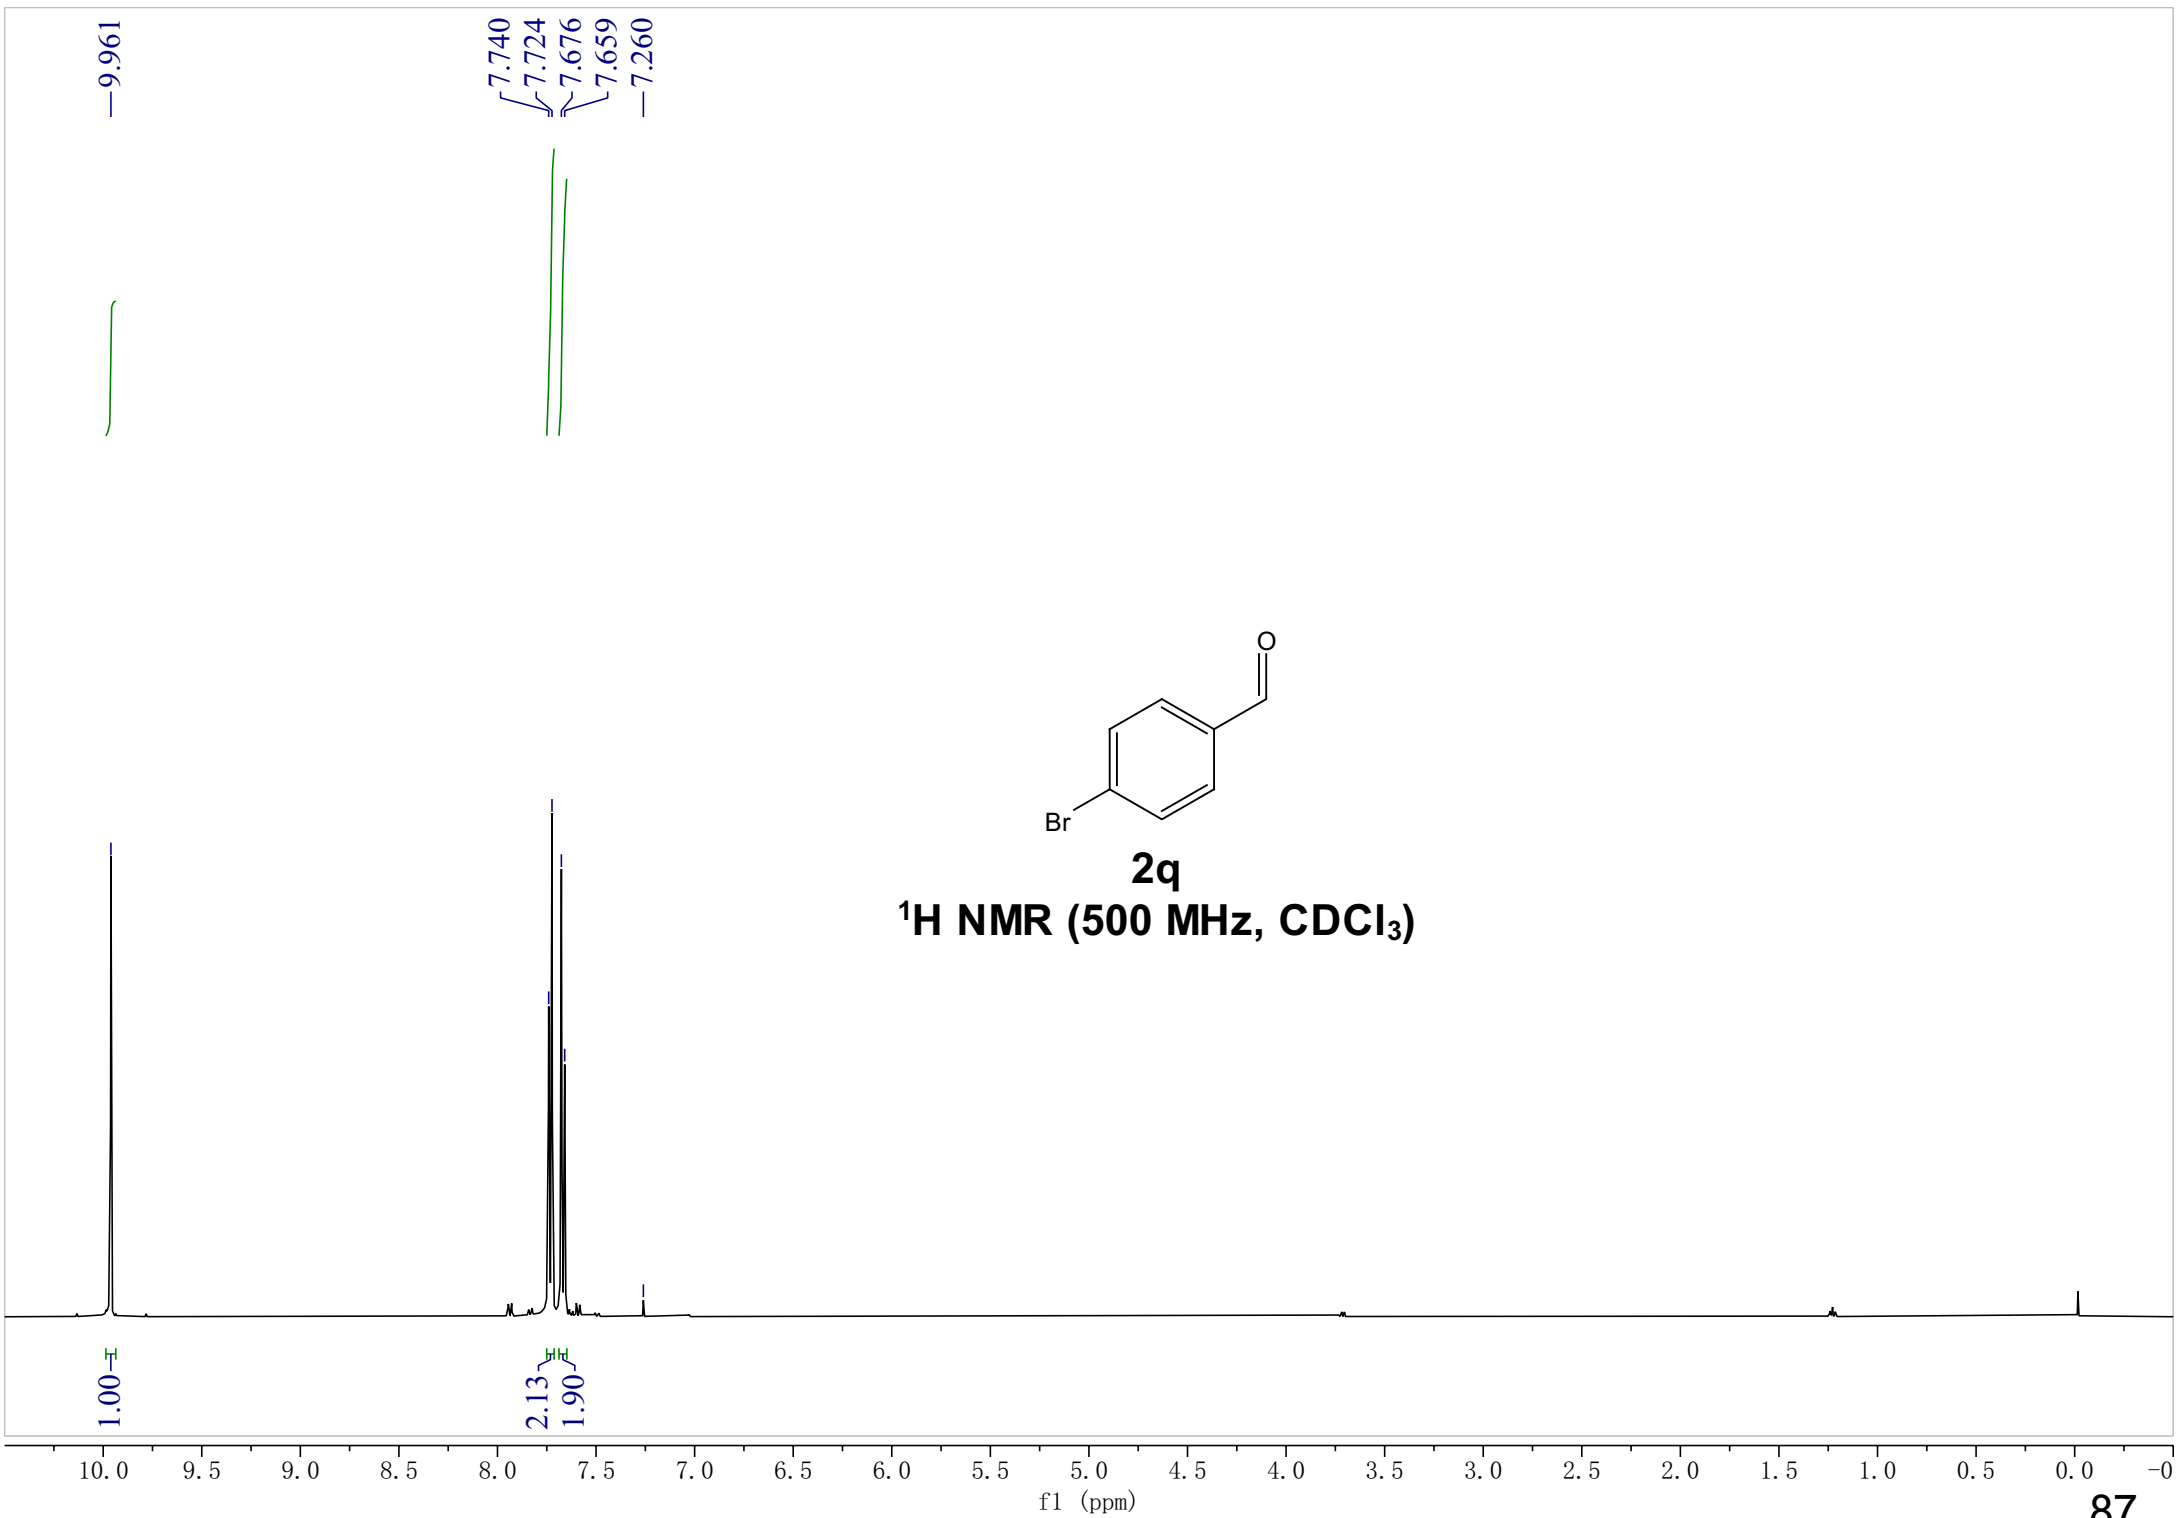



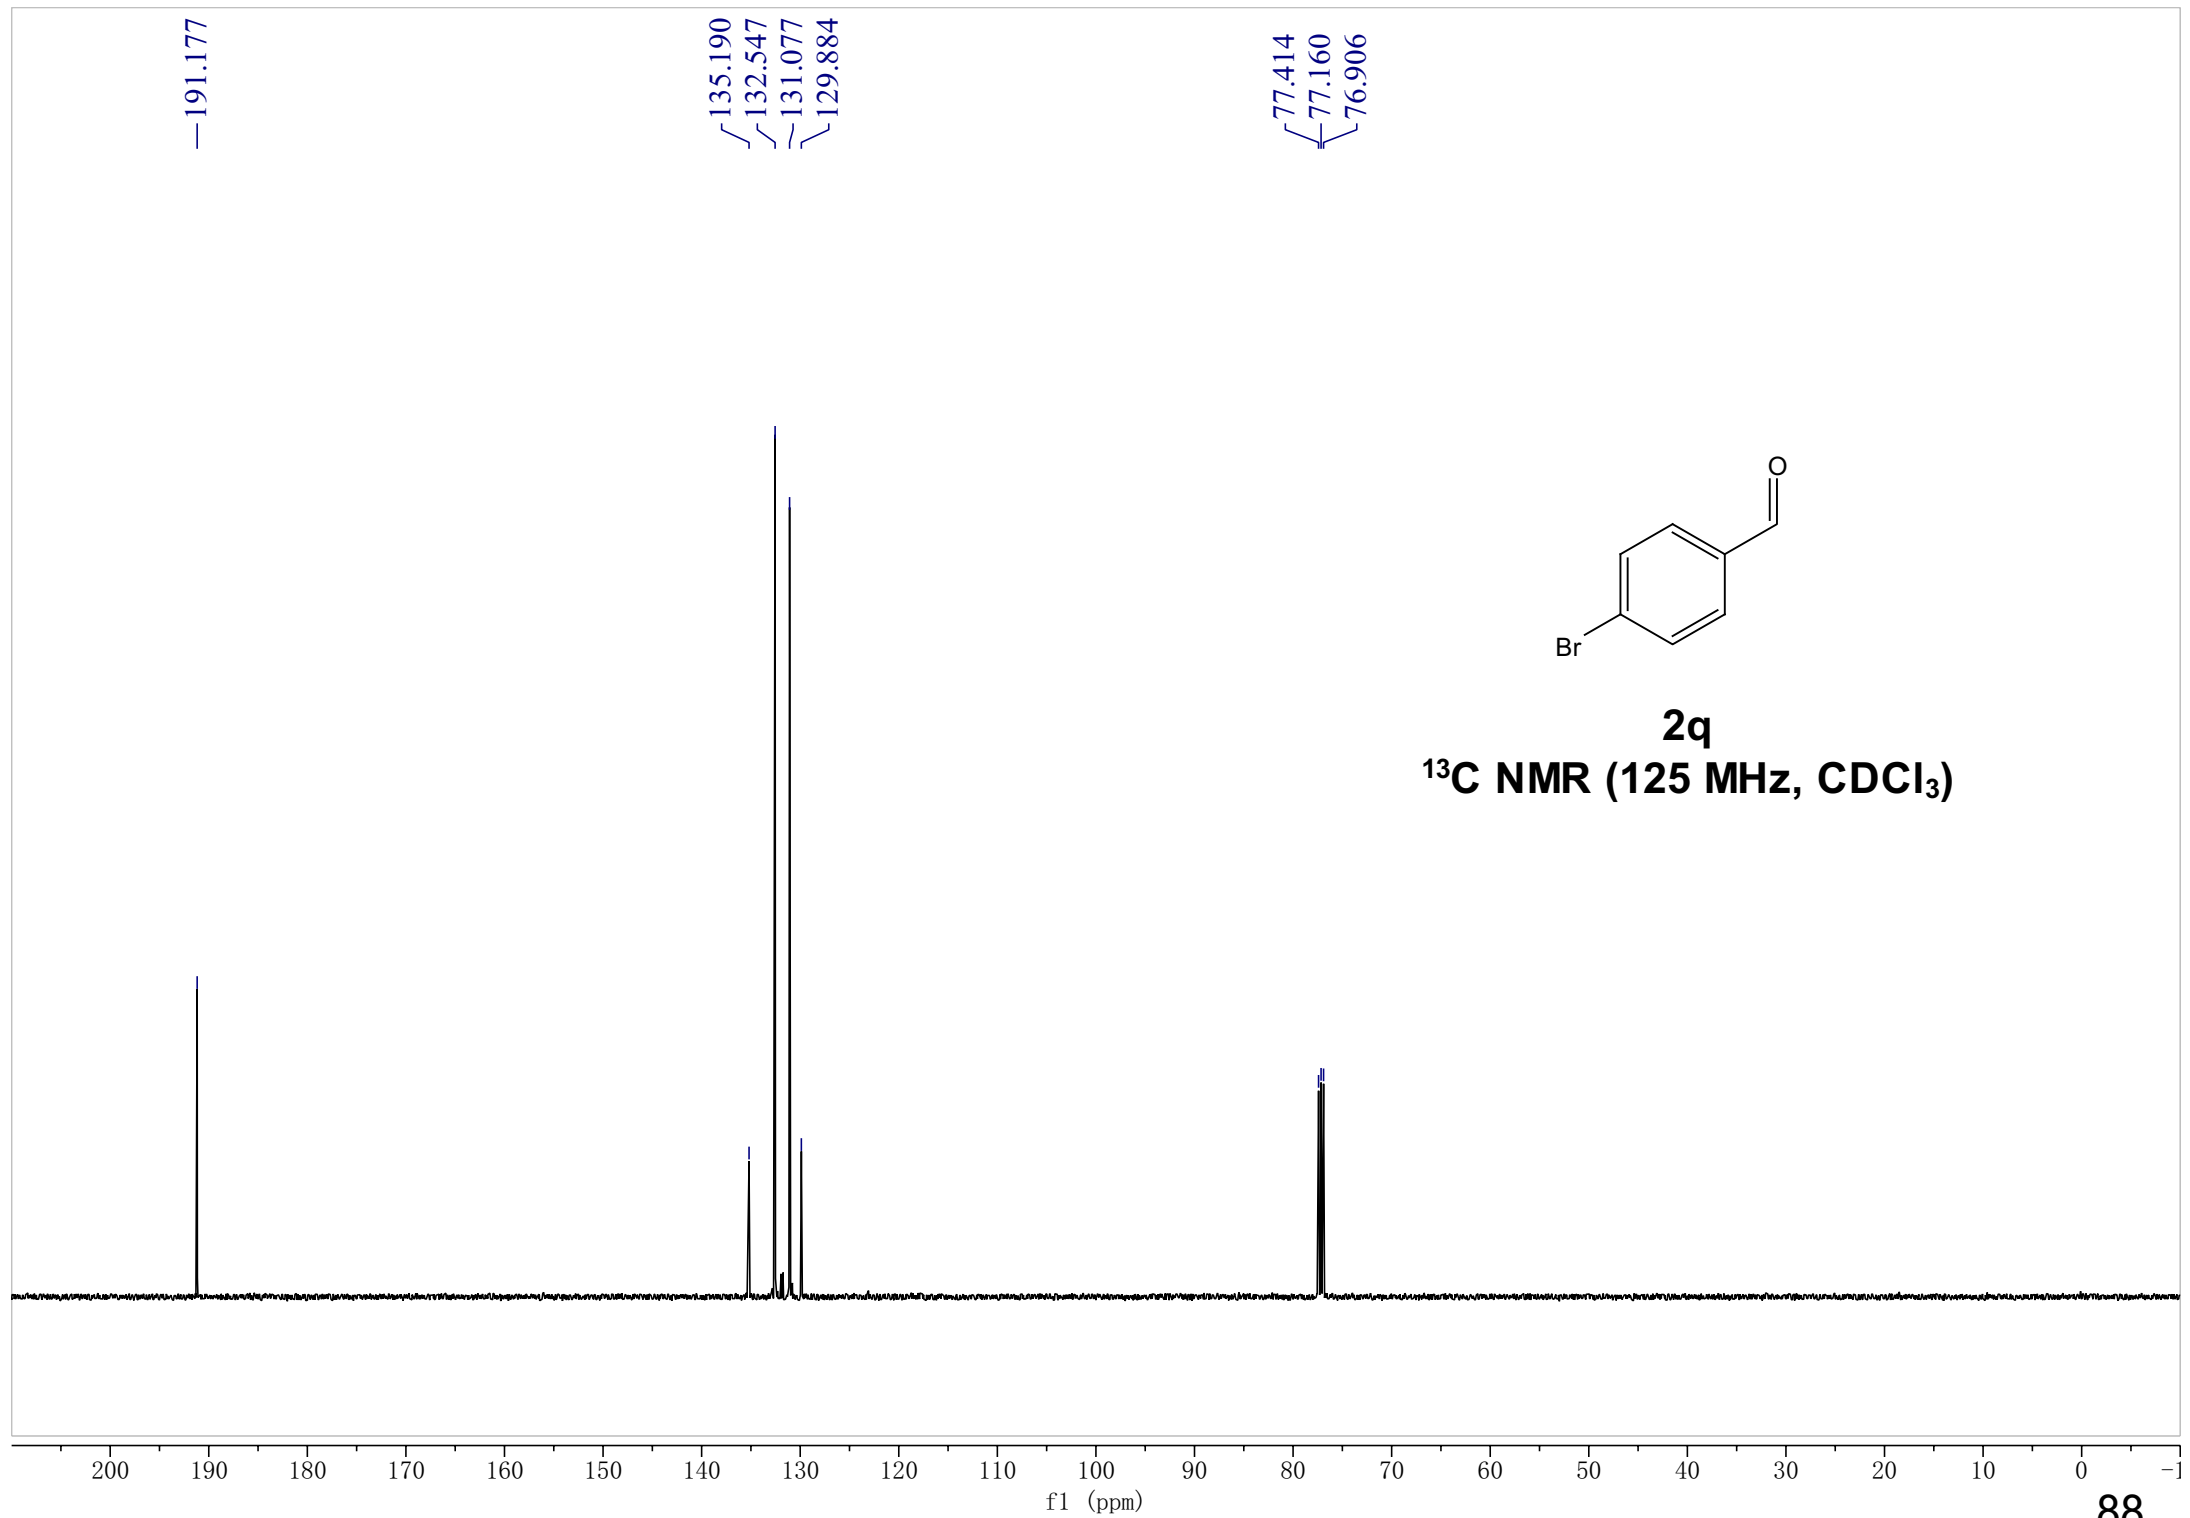

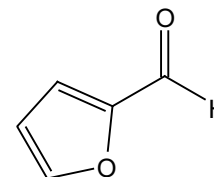

**2r**

**<sup>1</sup>H NMR (500 MHz, CDCl<sub>3</sub>)**

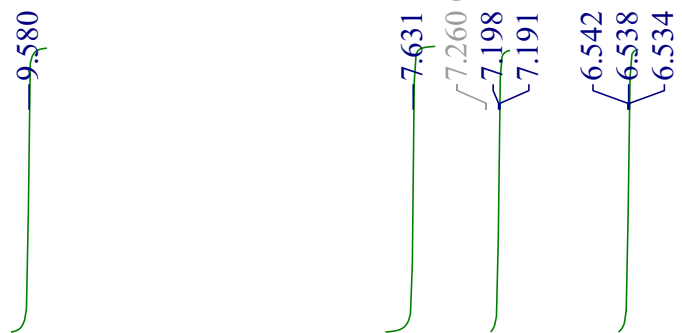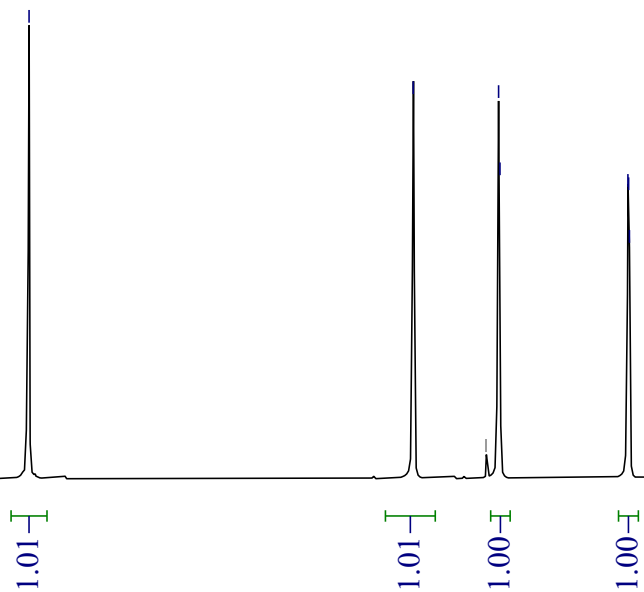

f1 (ppm)

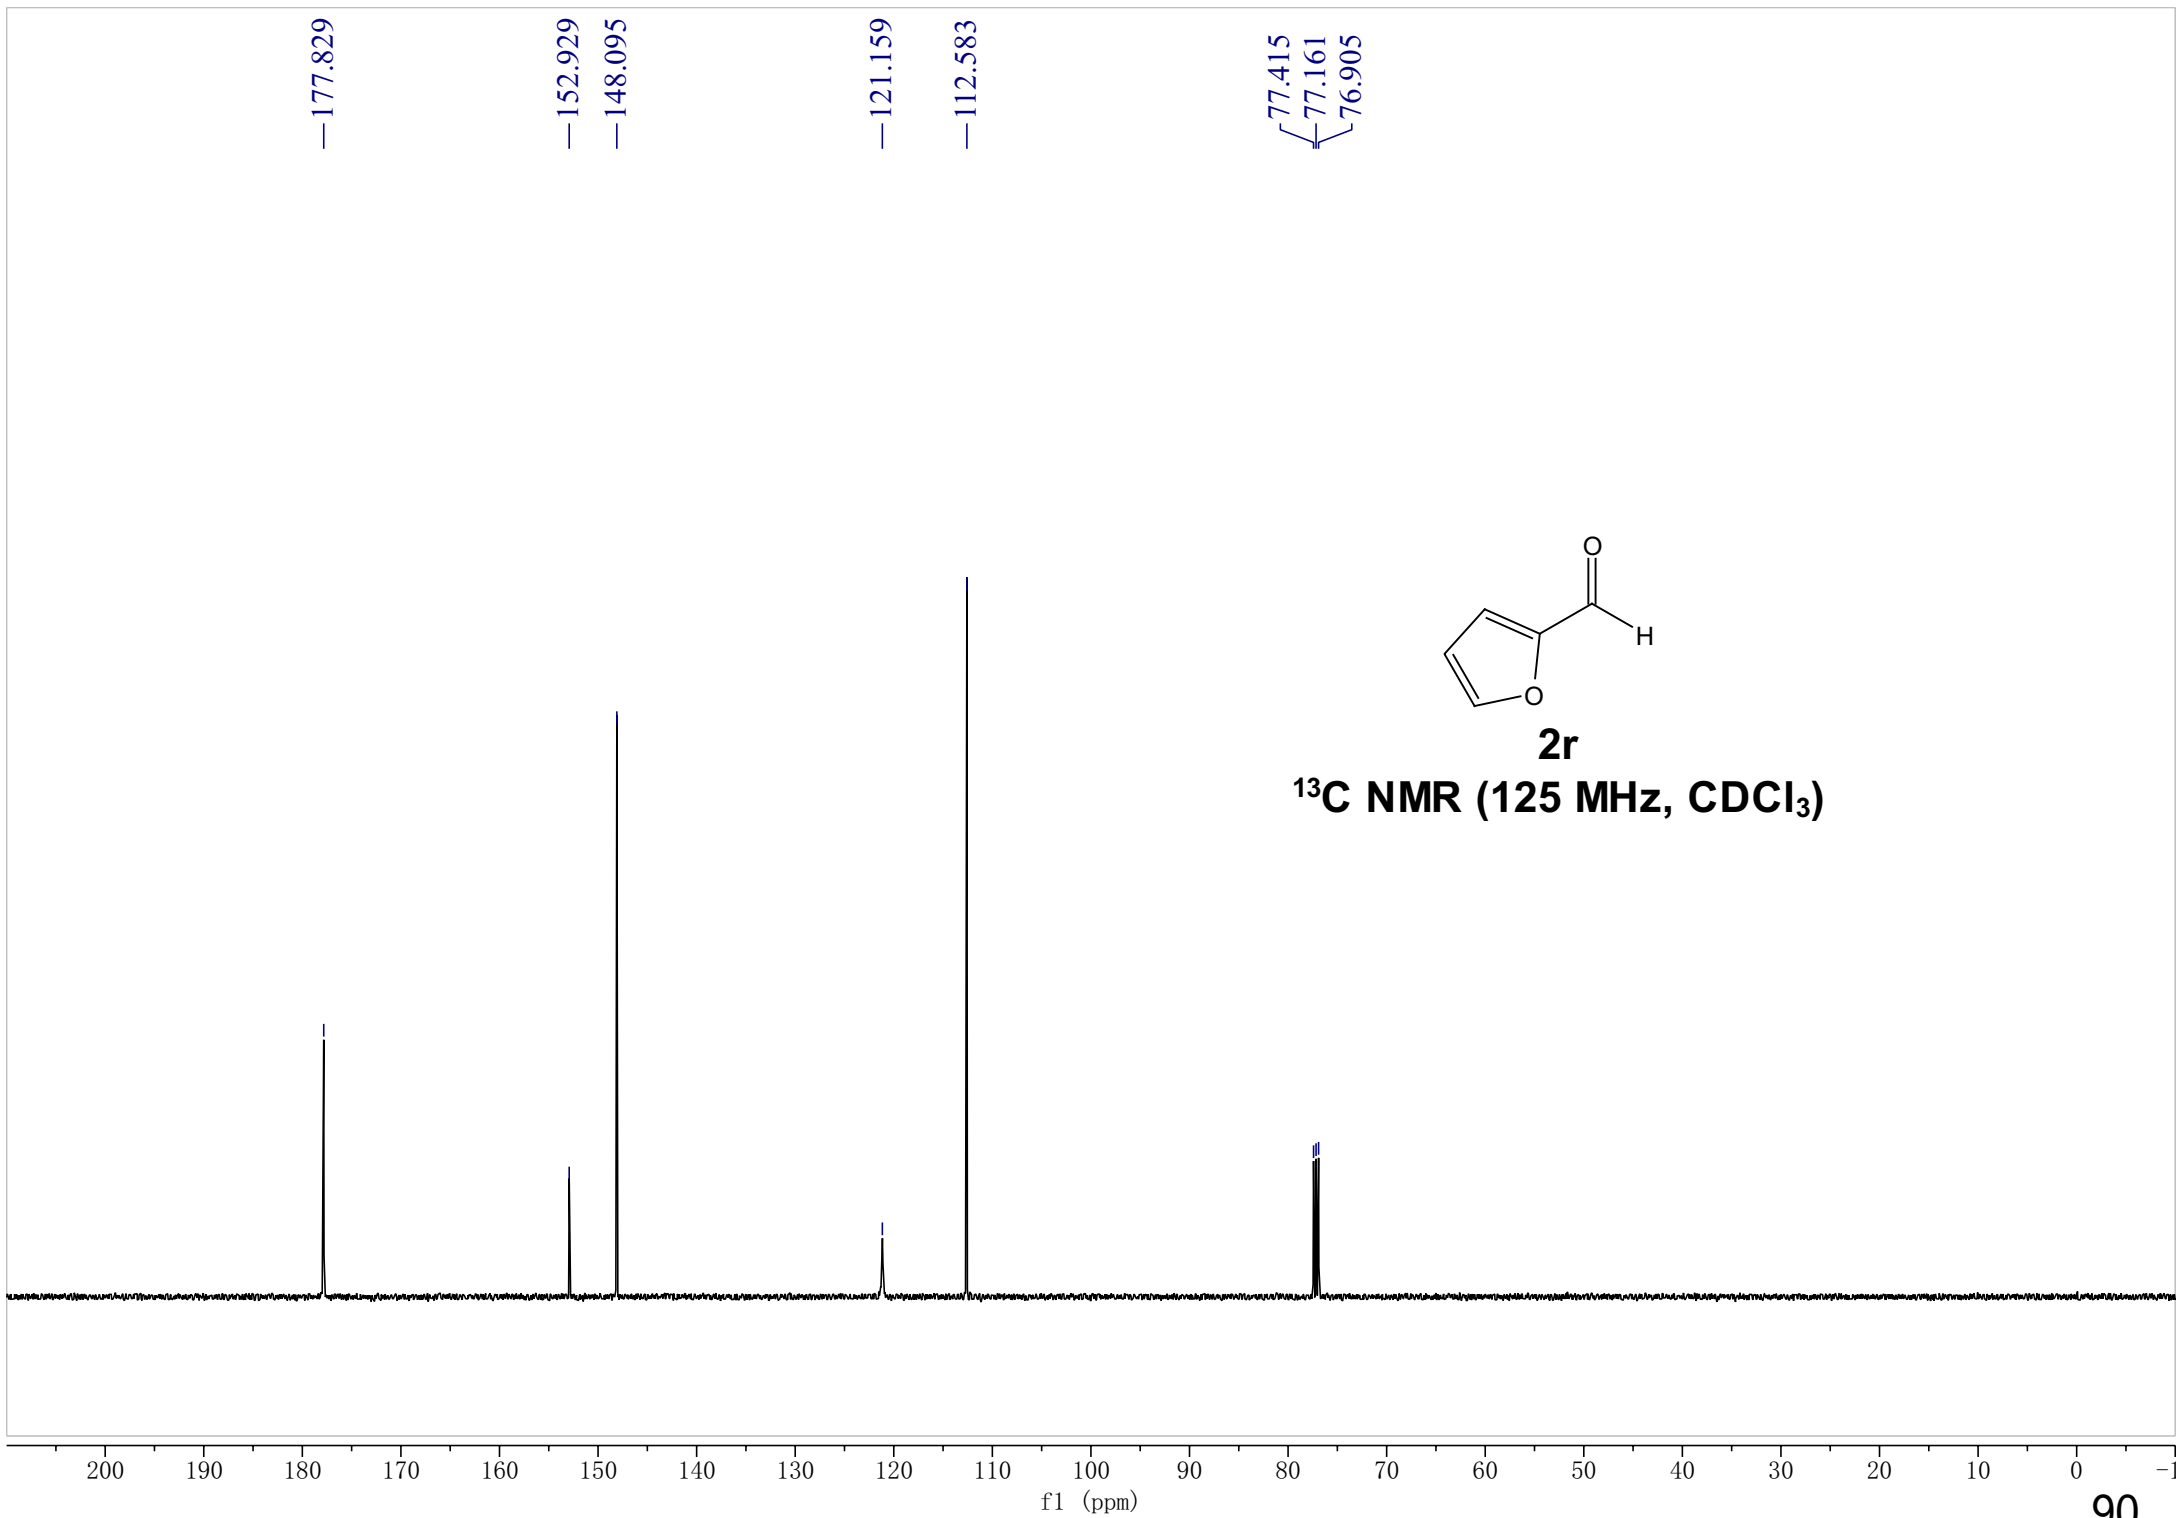

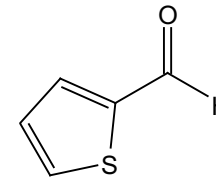

**2s**

**<sup>1</sup>H NMR (500 MHz, CDCl<sub>3</sub>)**

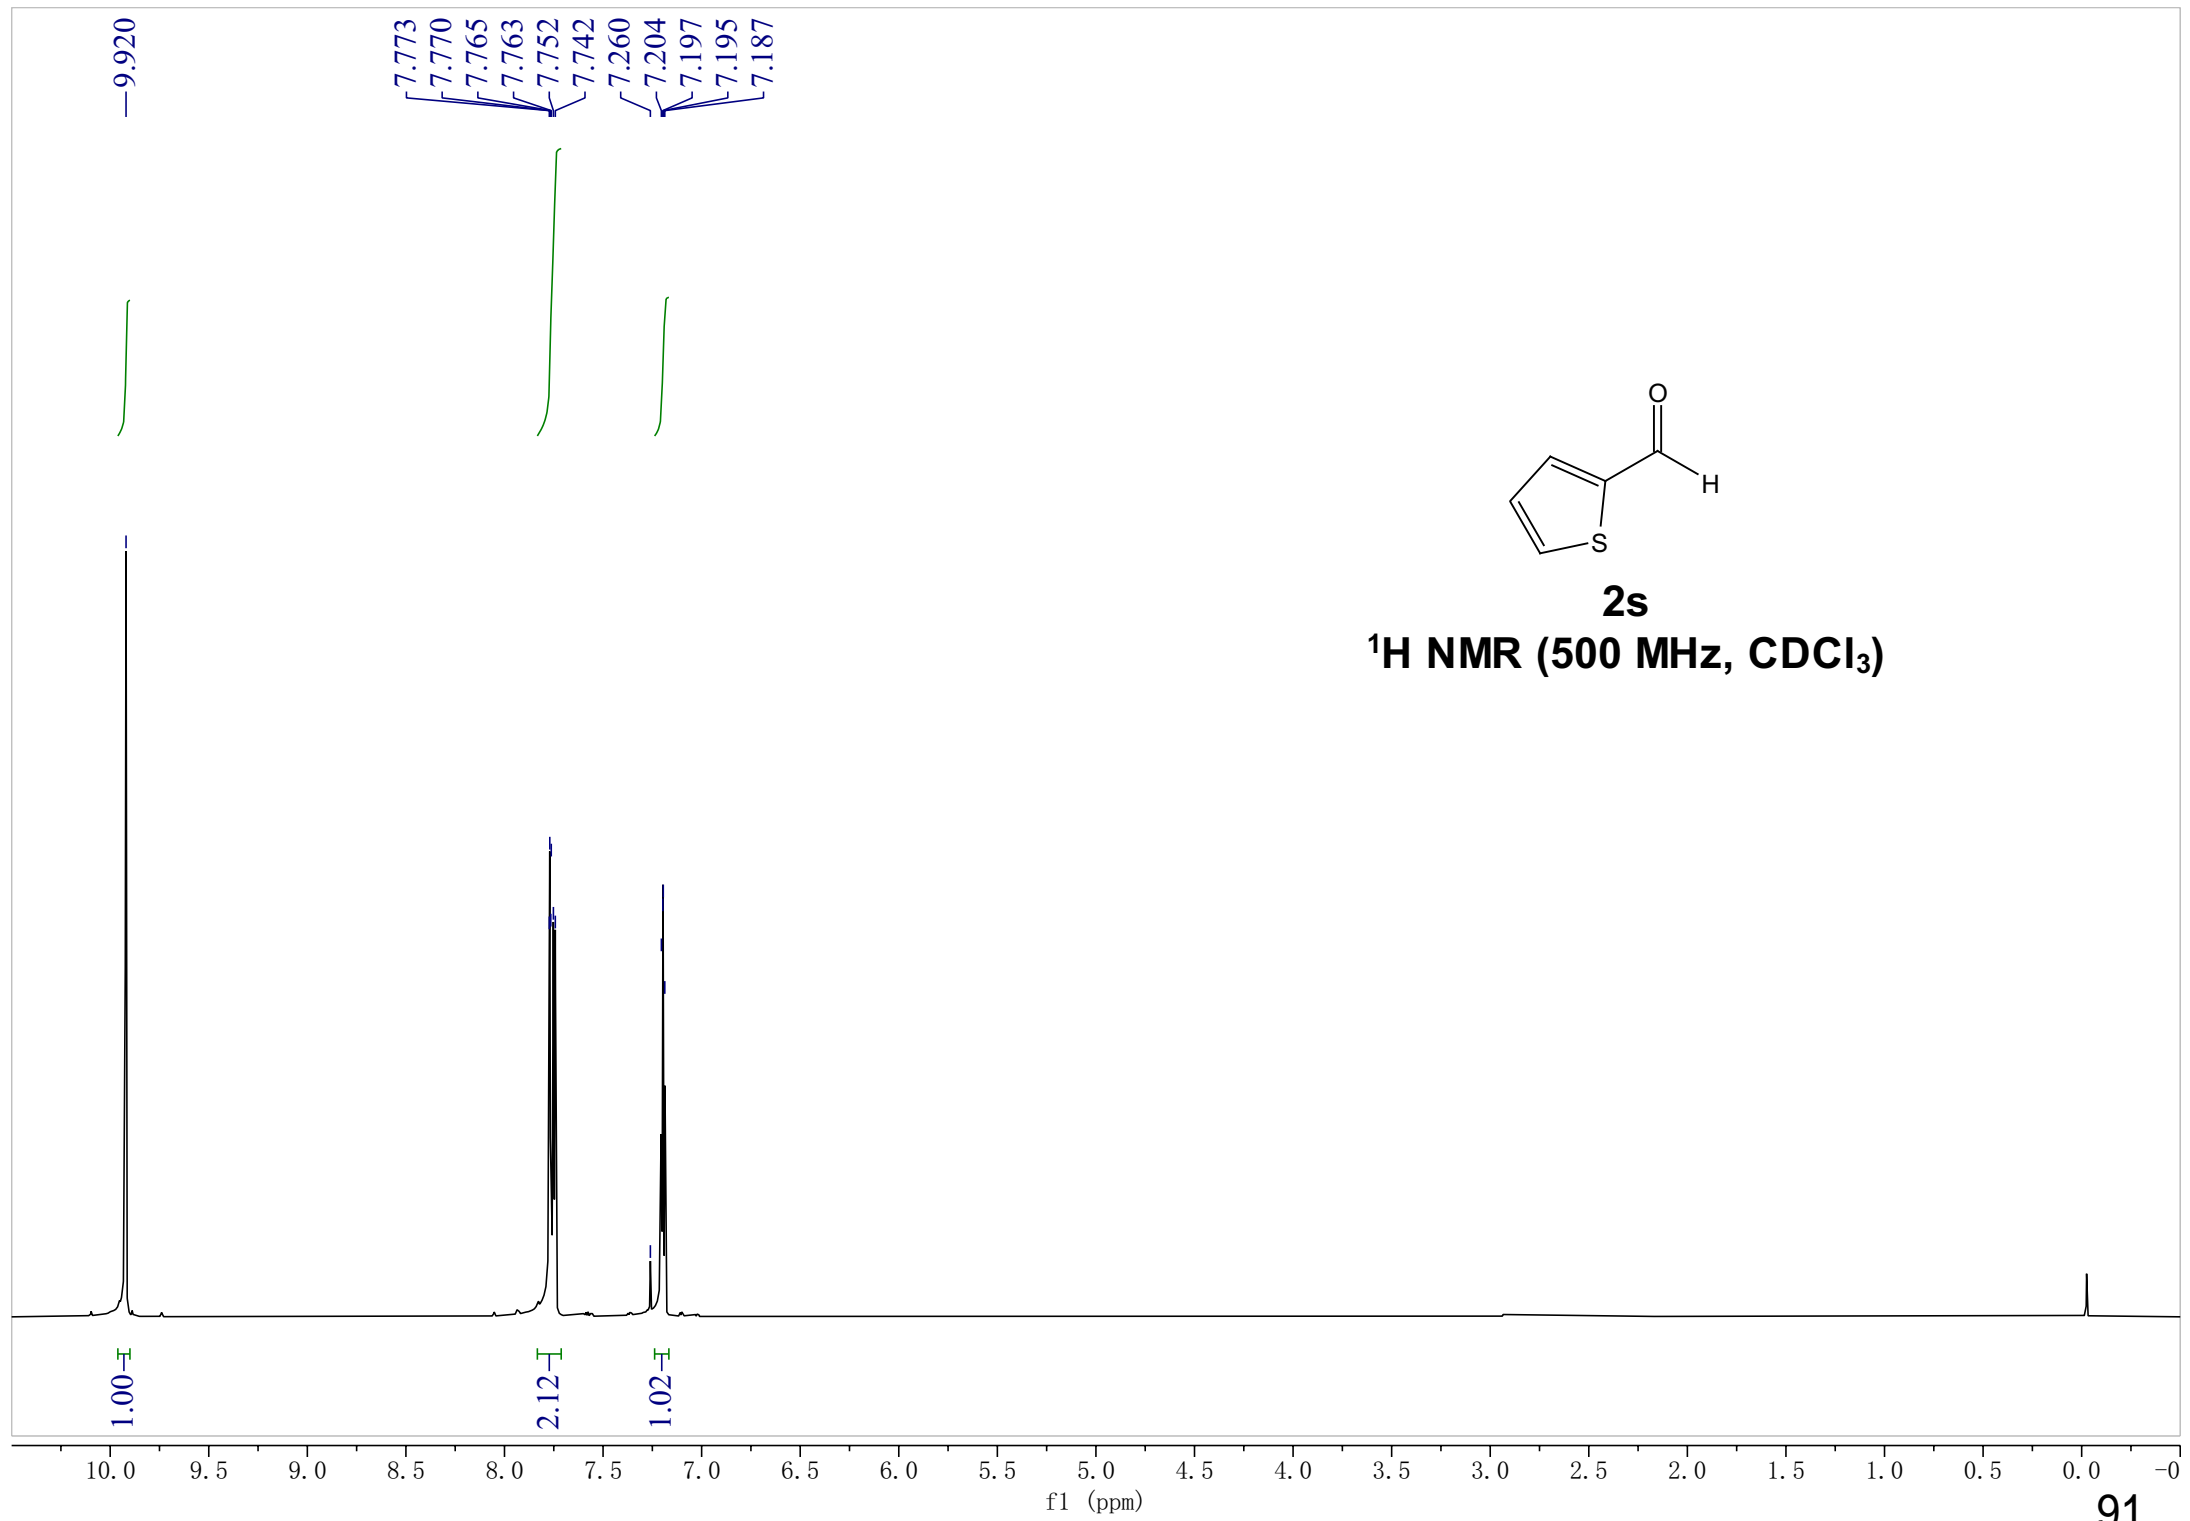

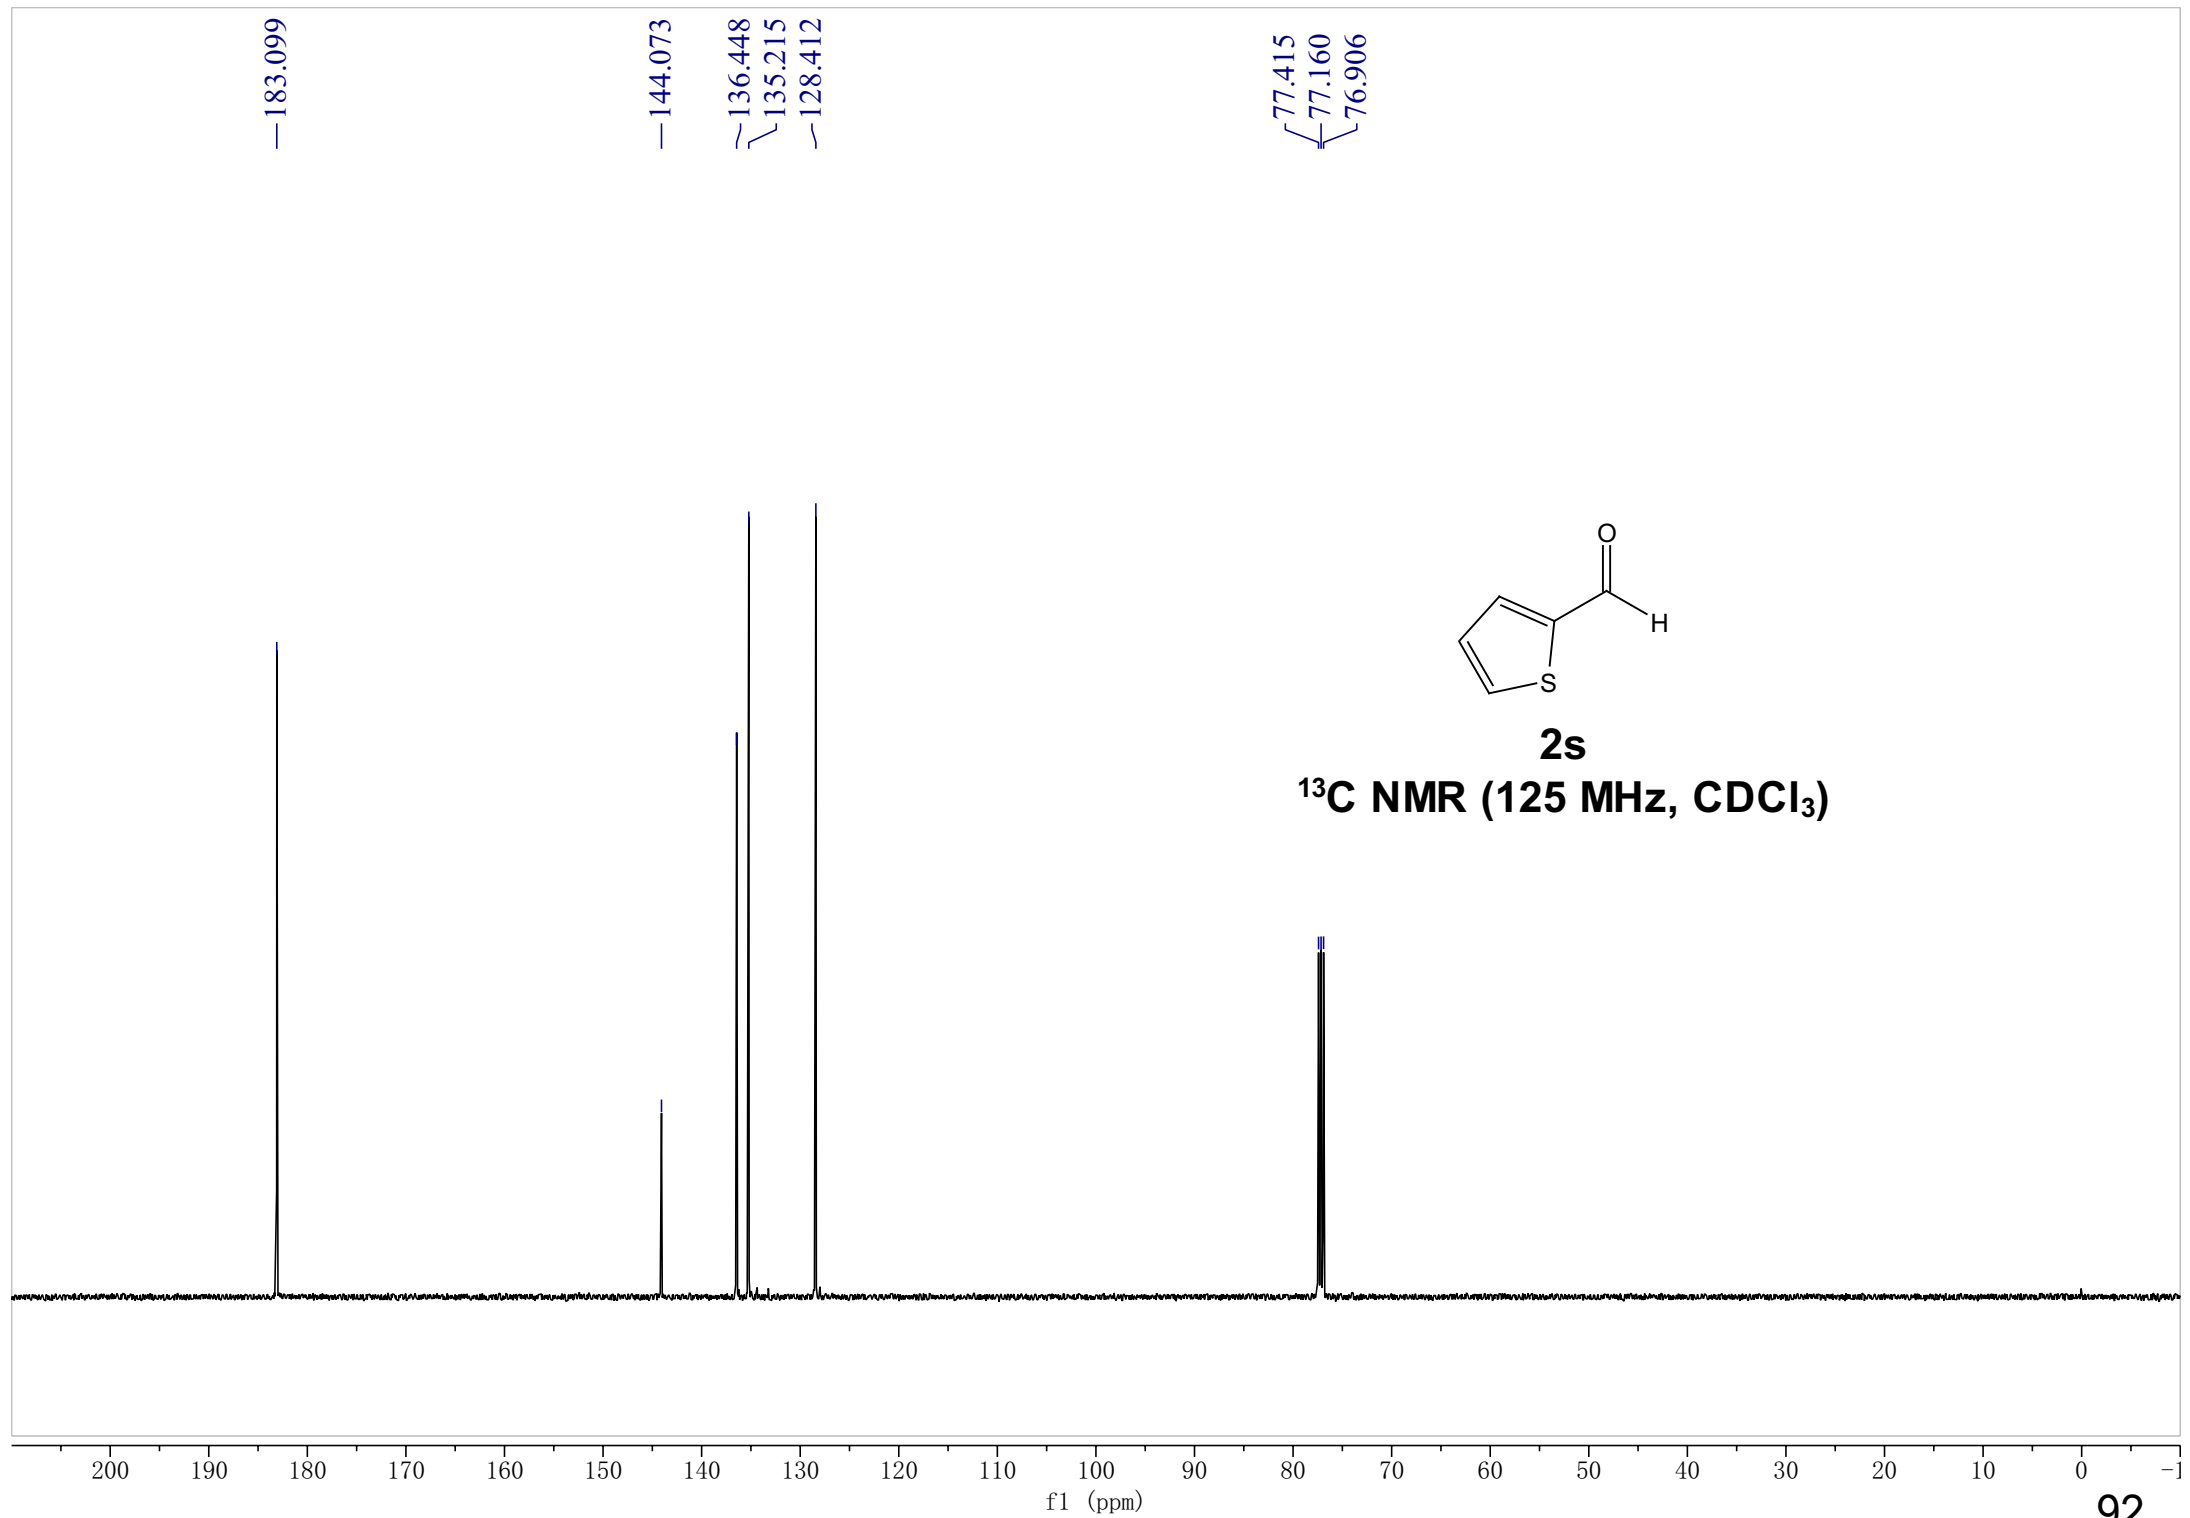

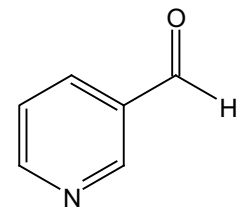

**2t**

**<sup>1</sup>H NMR (500 MHz, CDCl<sub>3</sub>)**

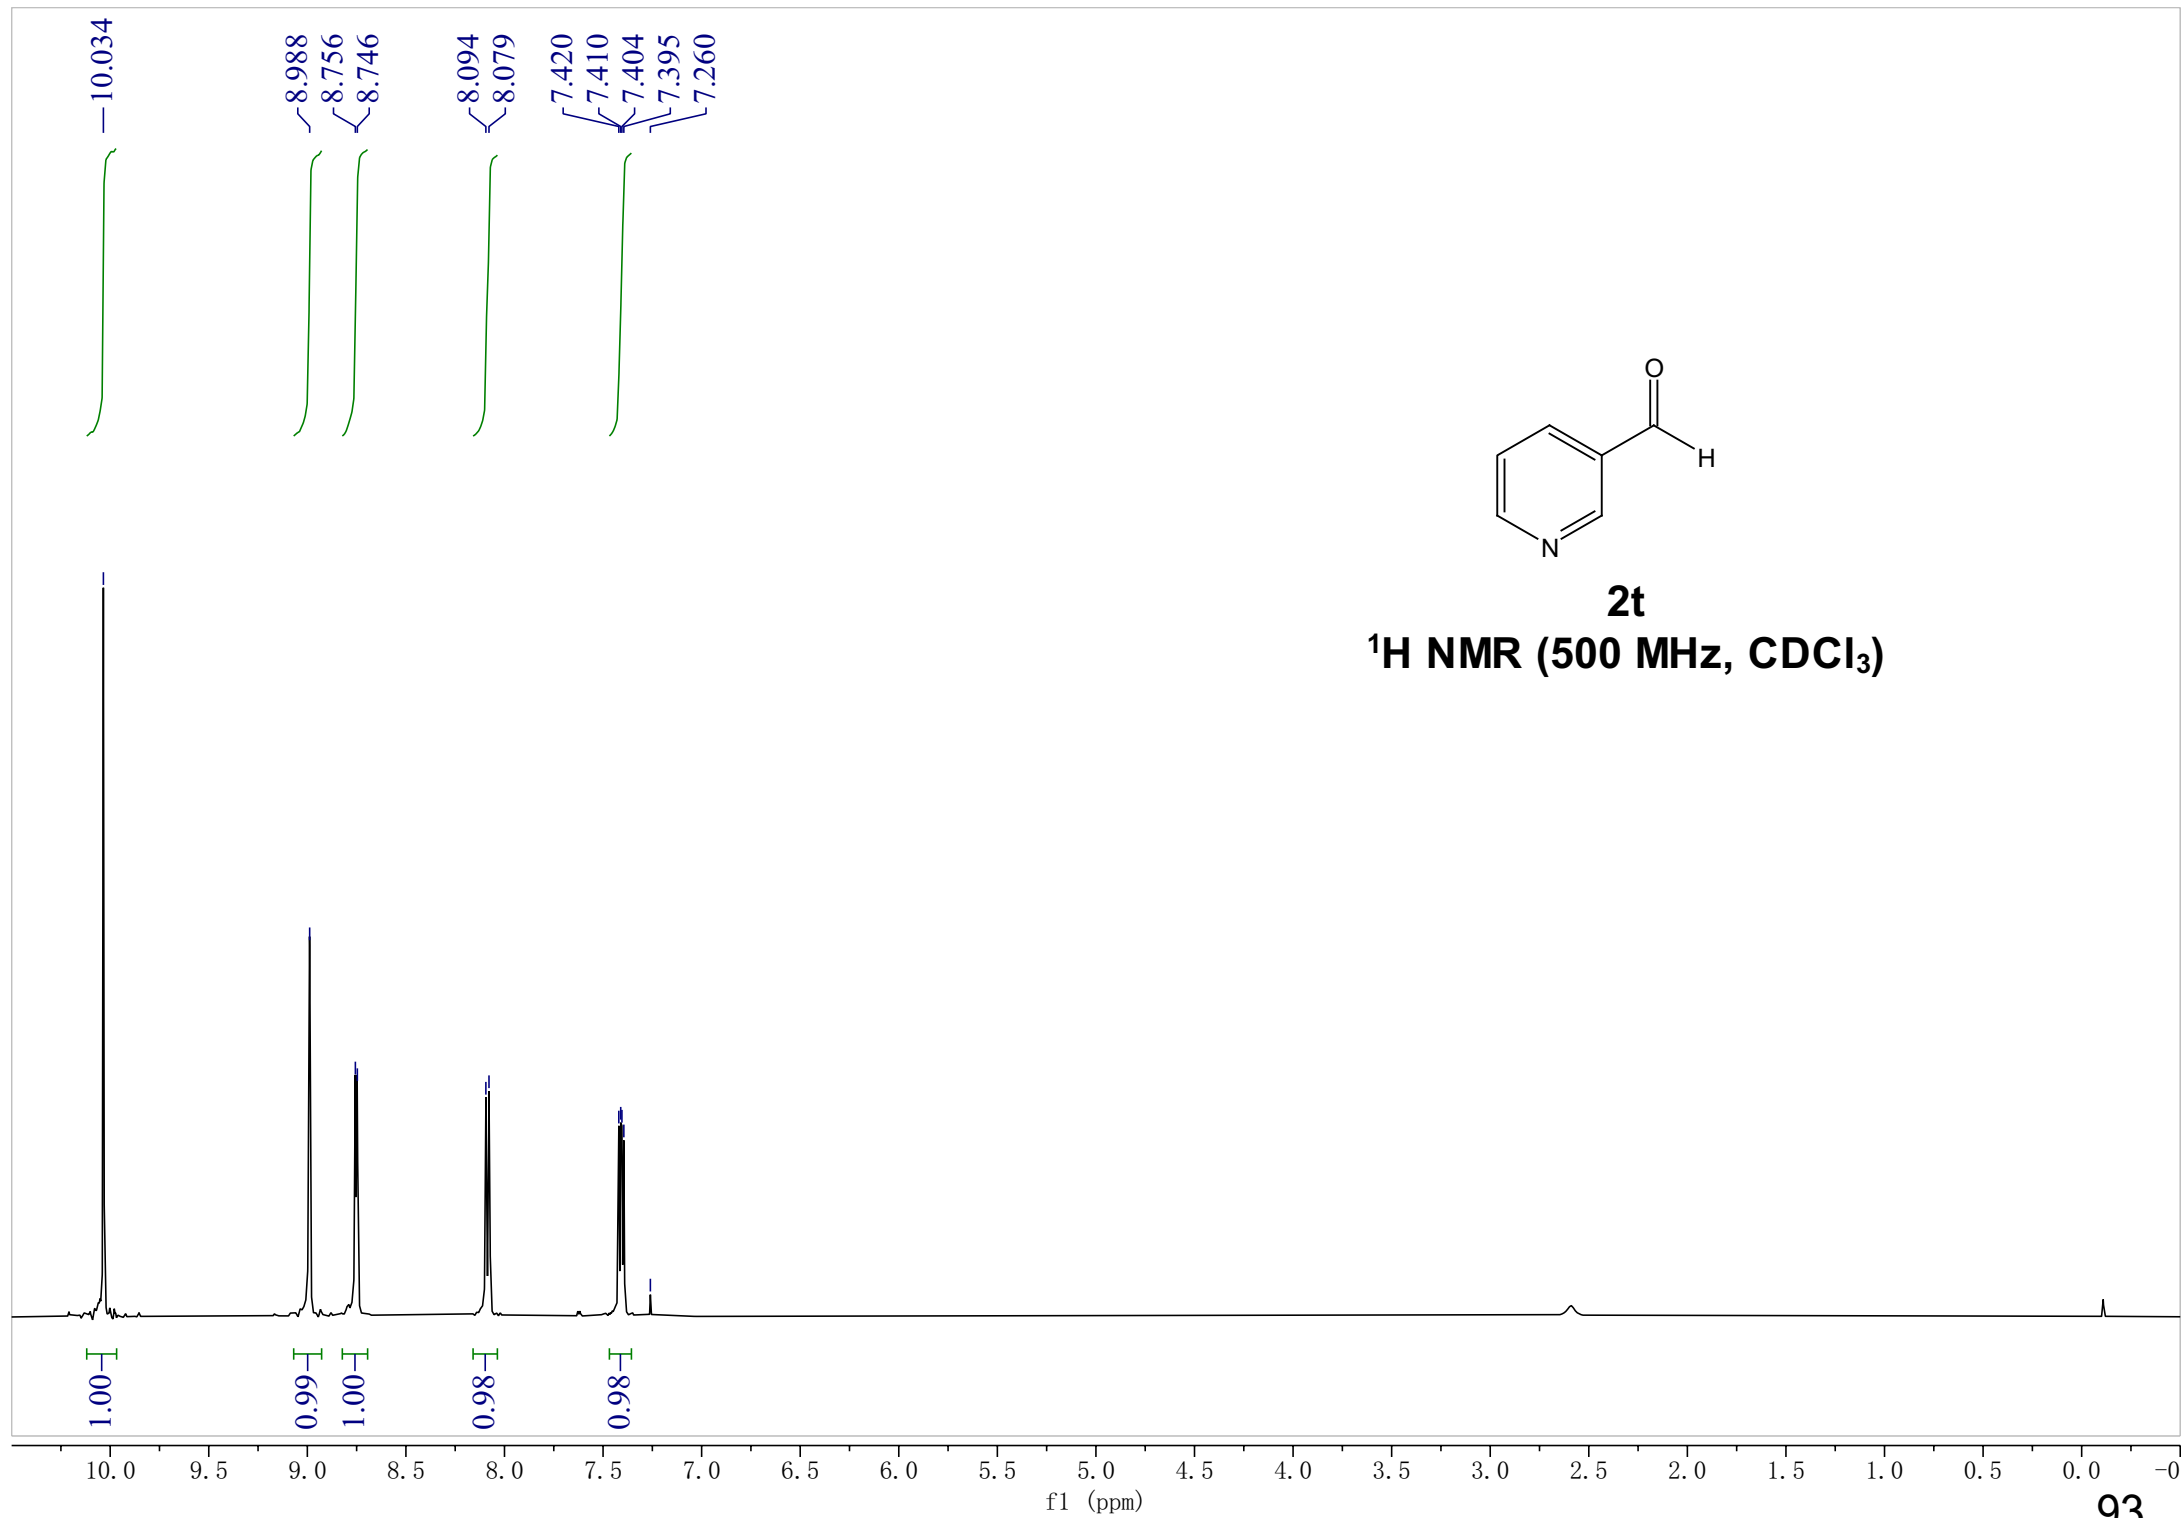

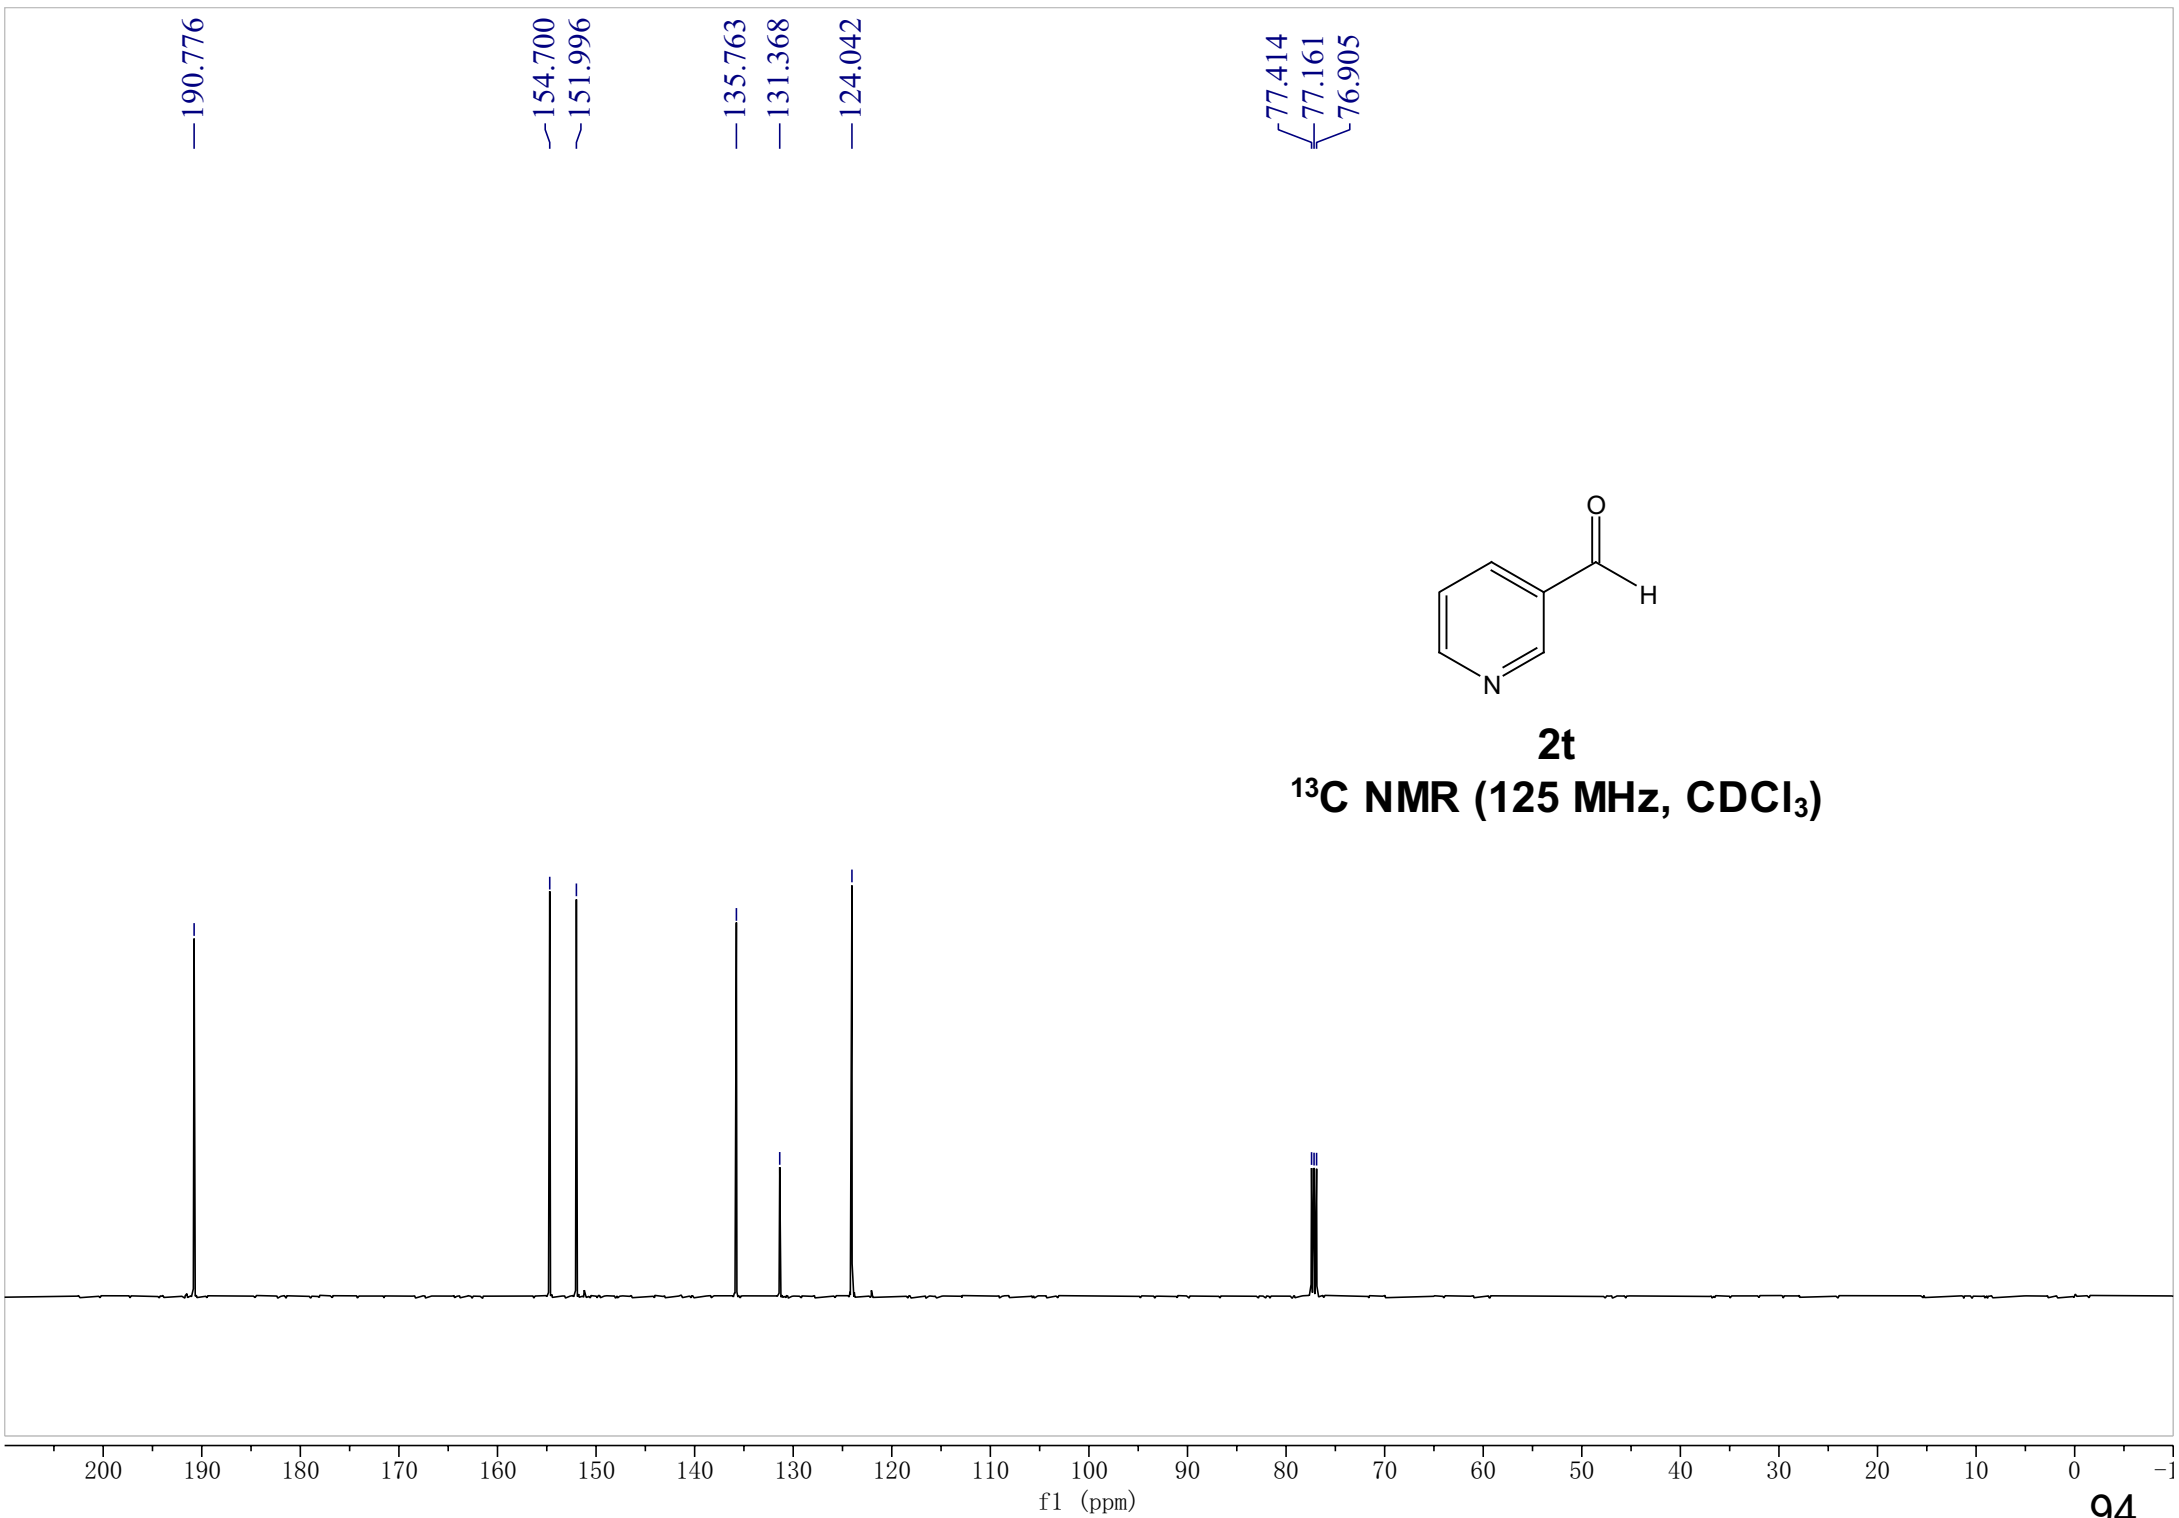

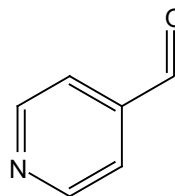

**2u**

**<sup>1</sup>H NMR (500 MHz, CDCl<sub>3</sub>)**

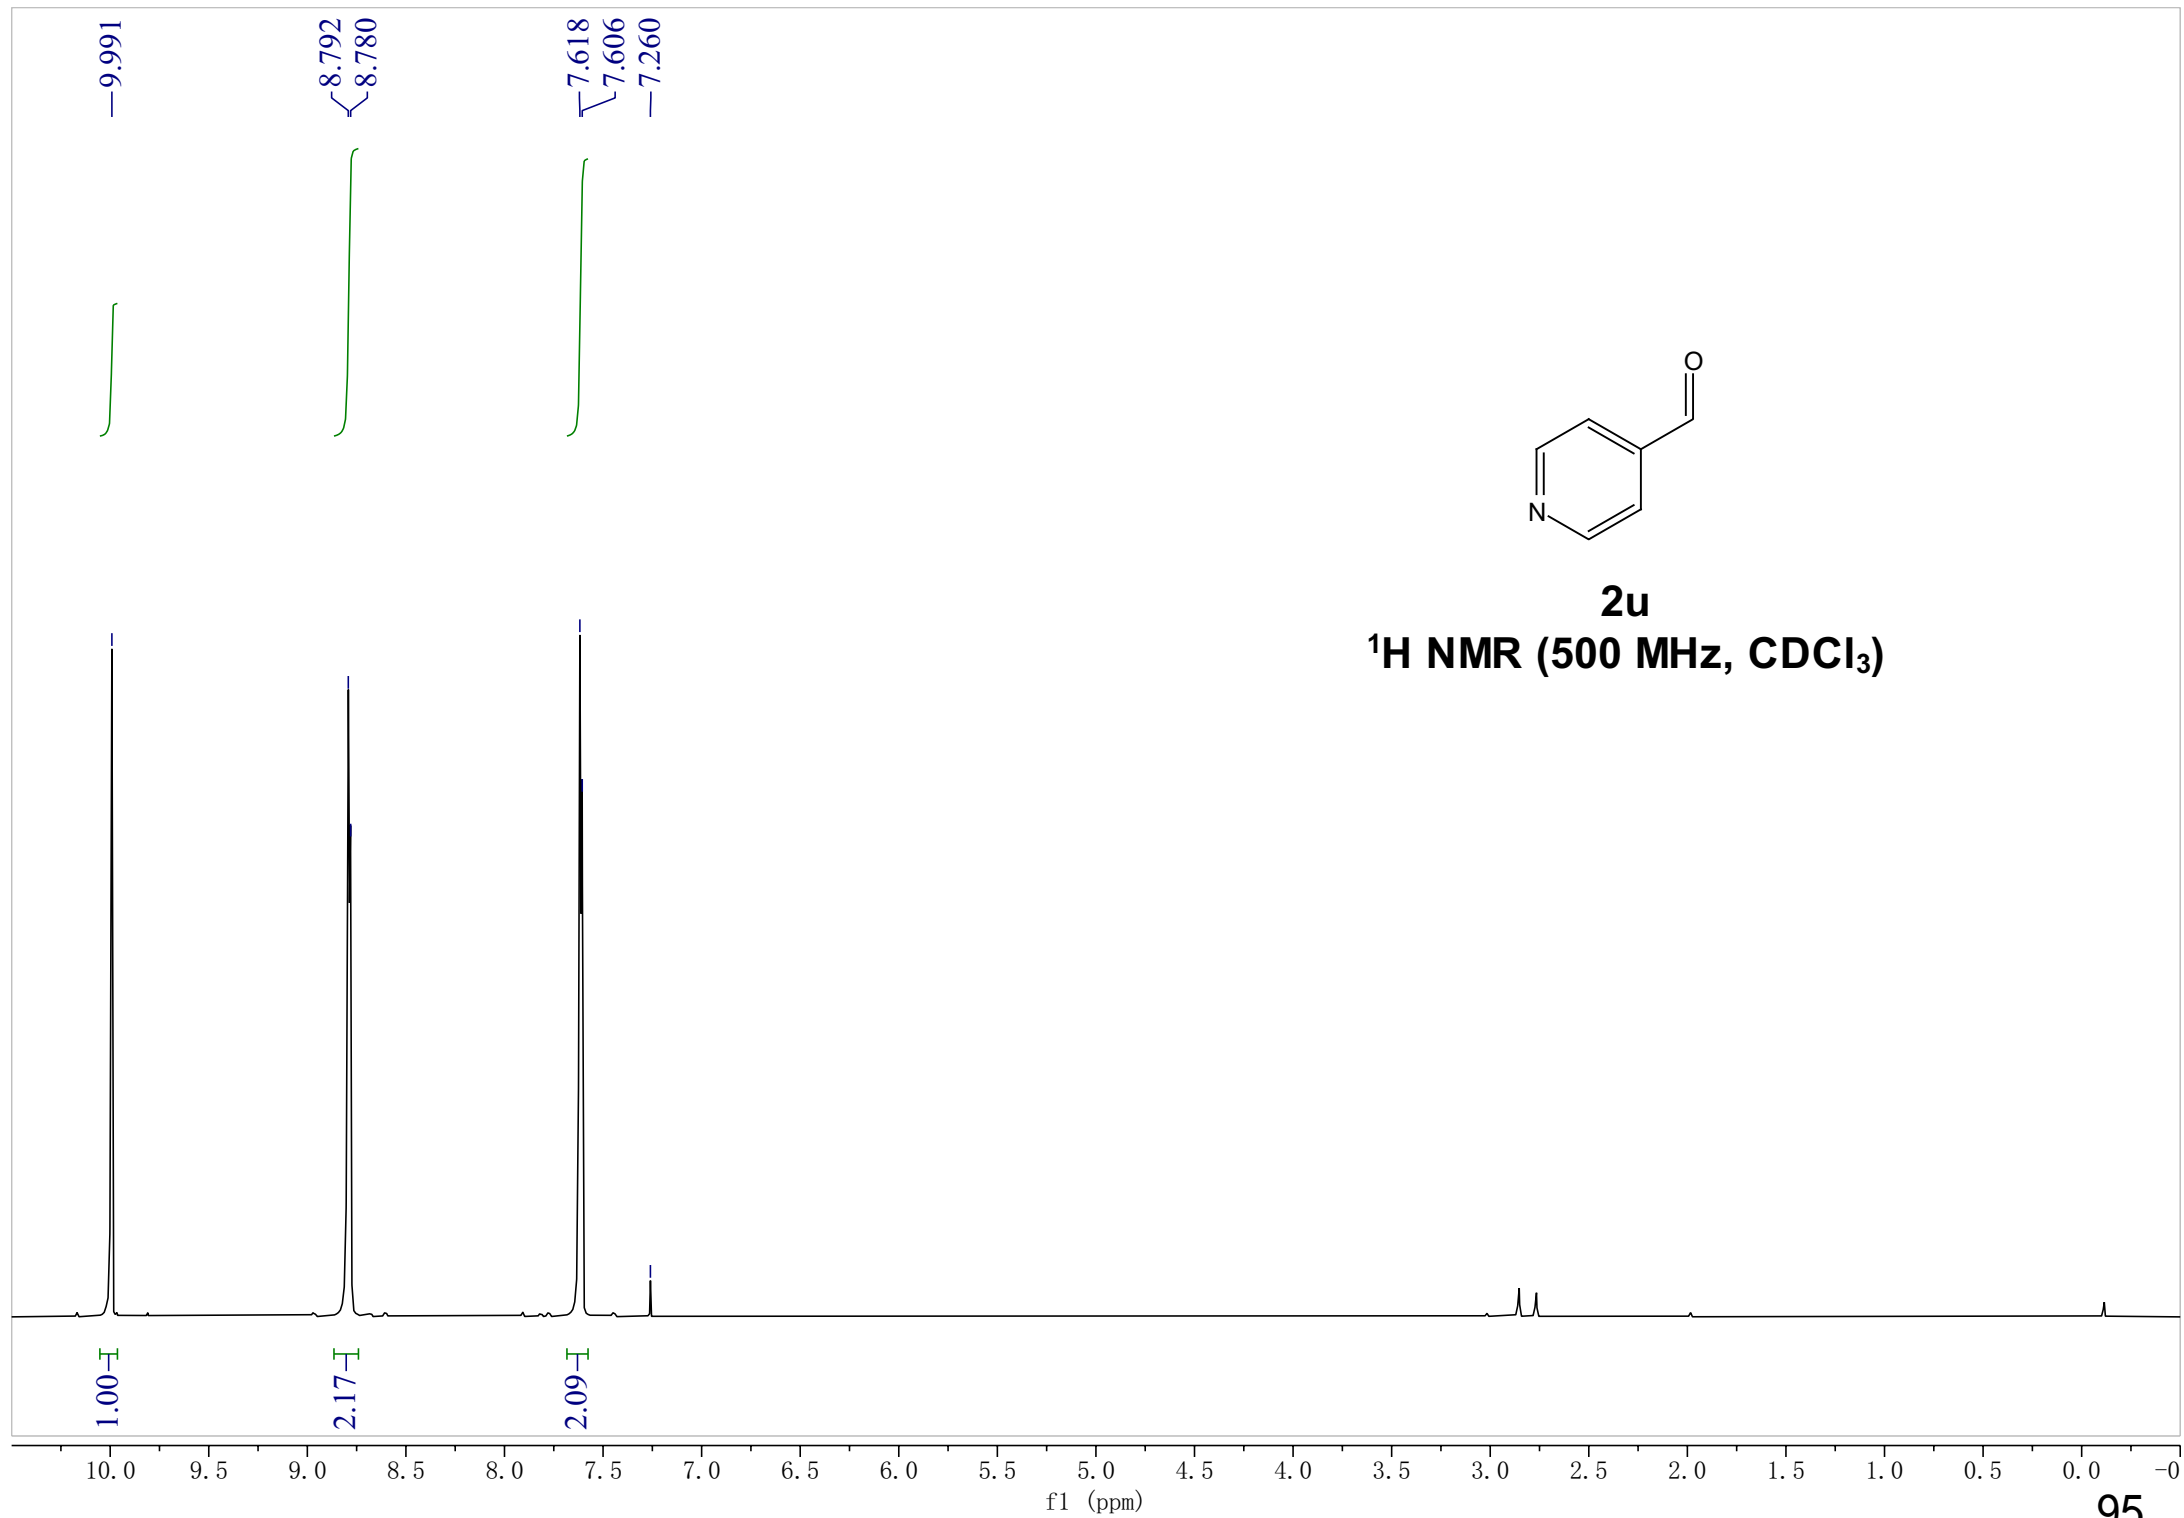



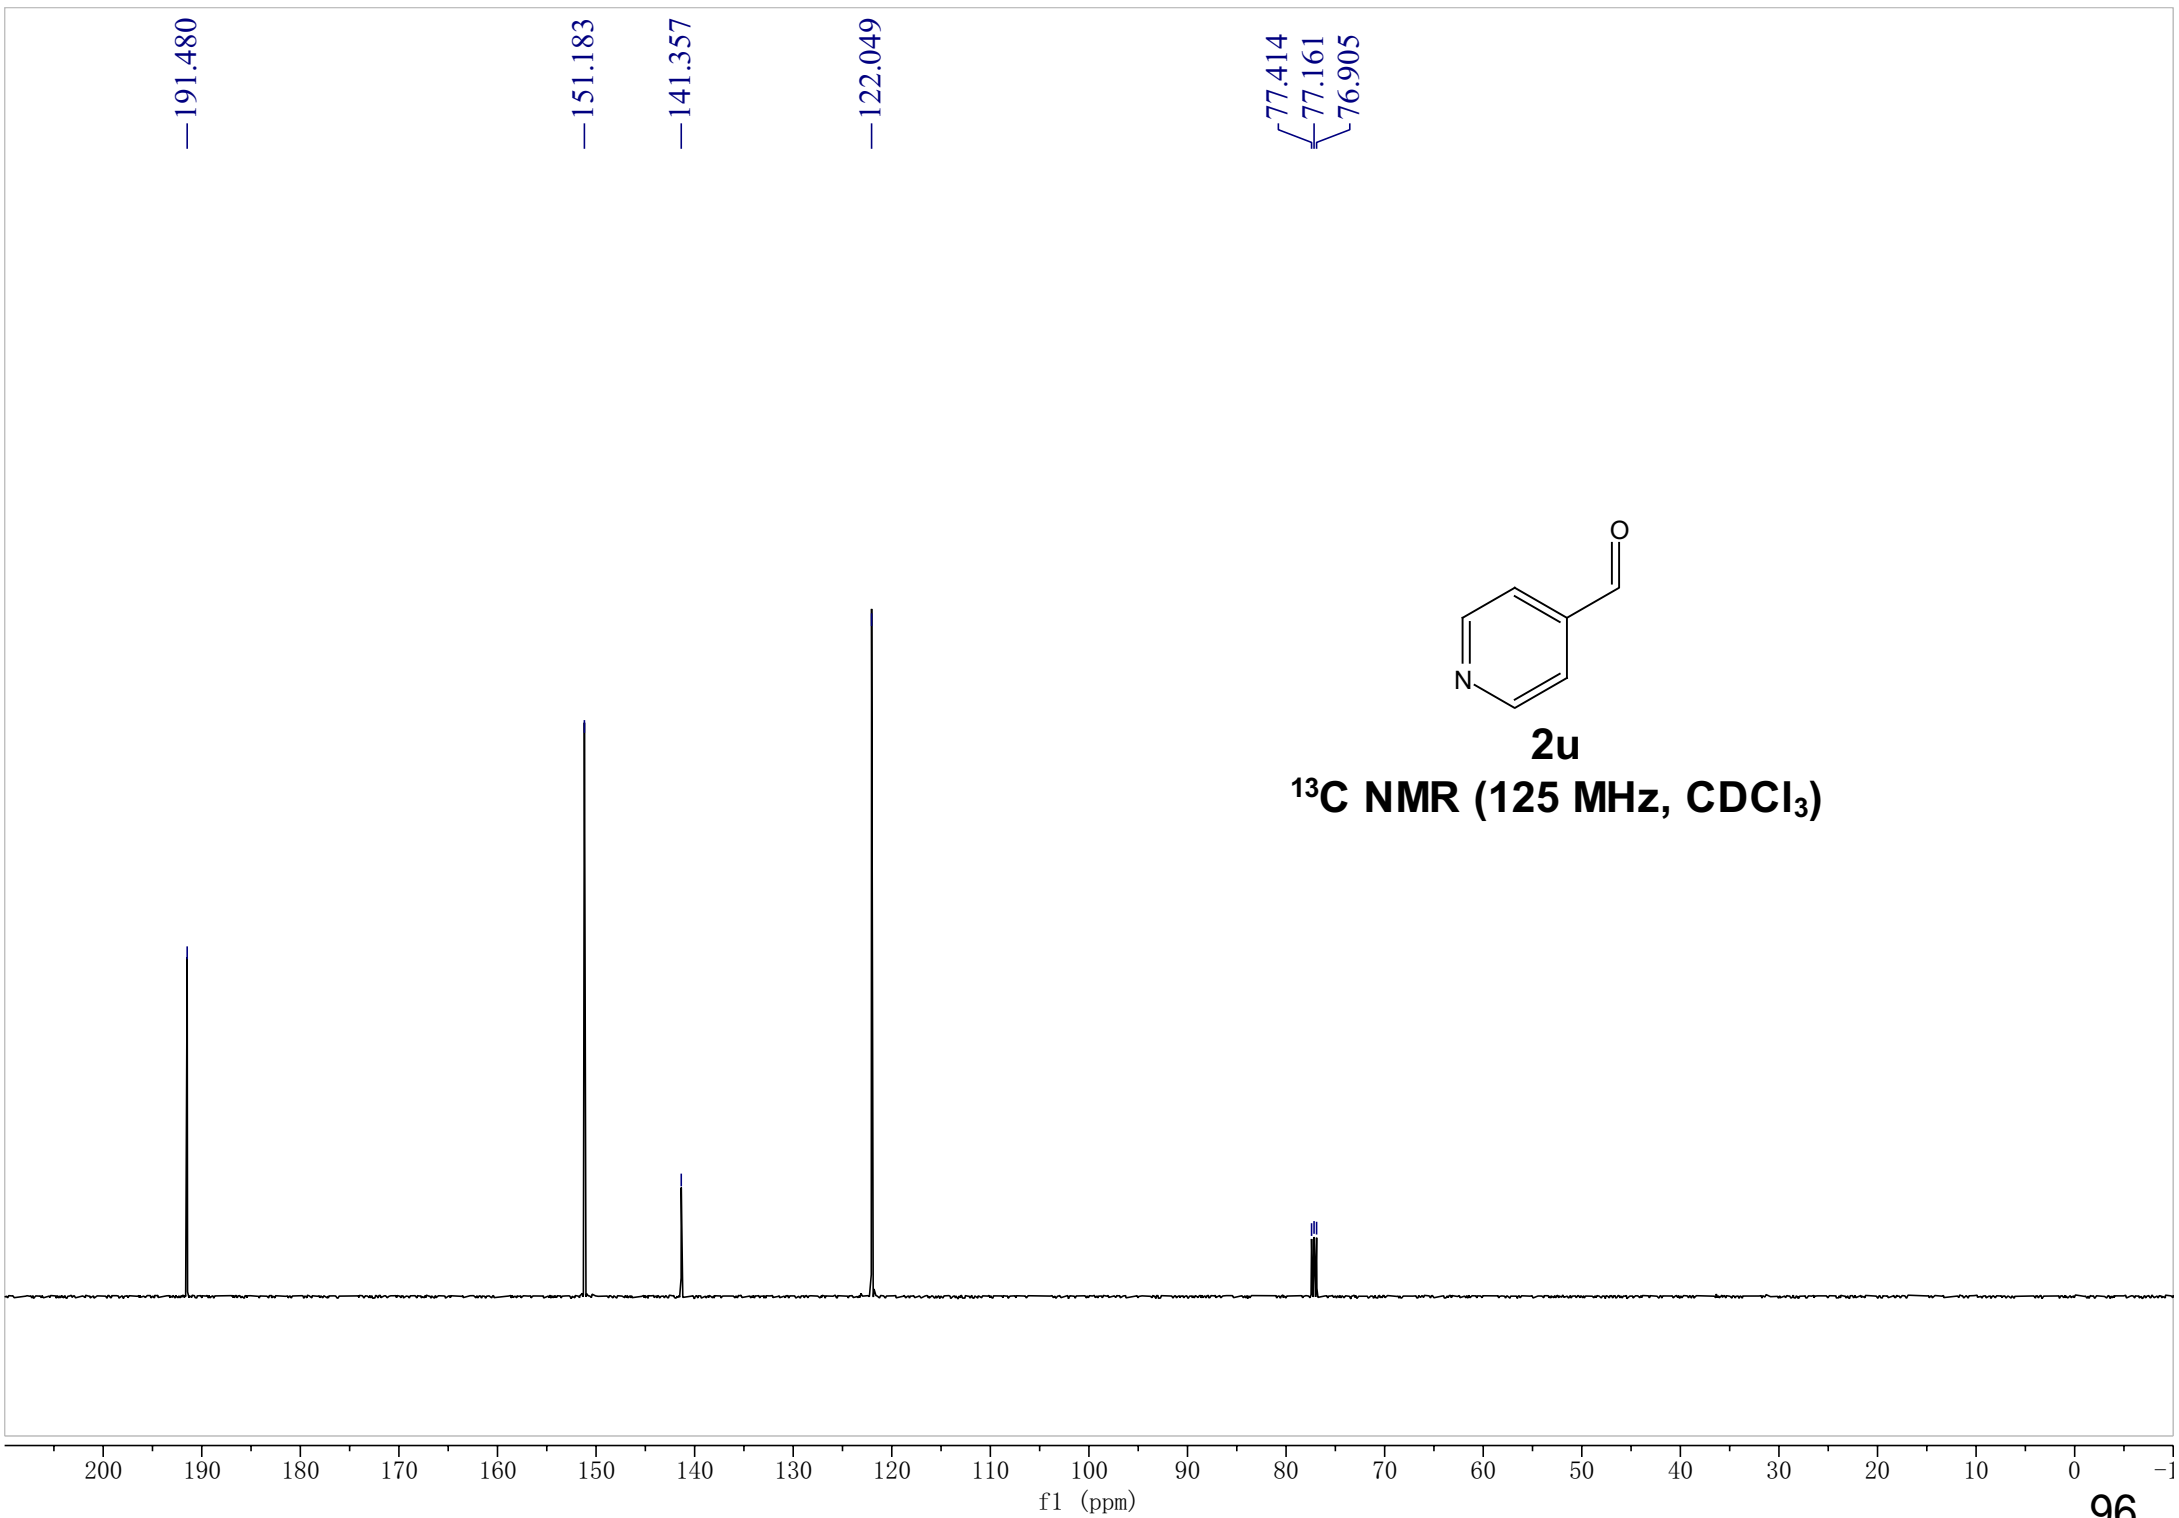

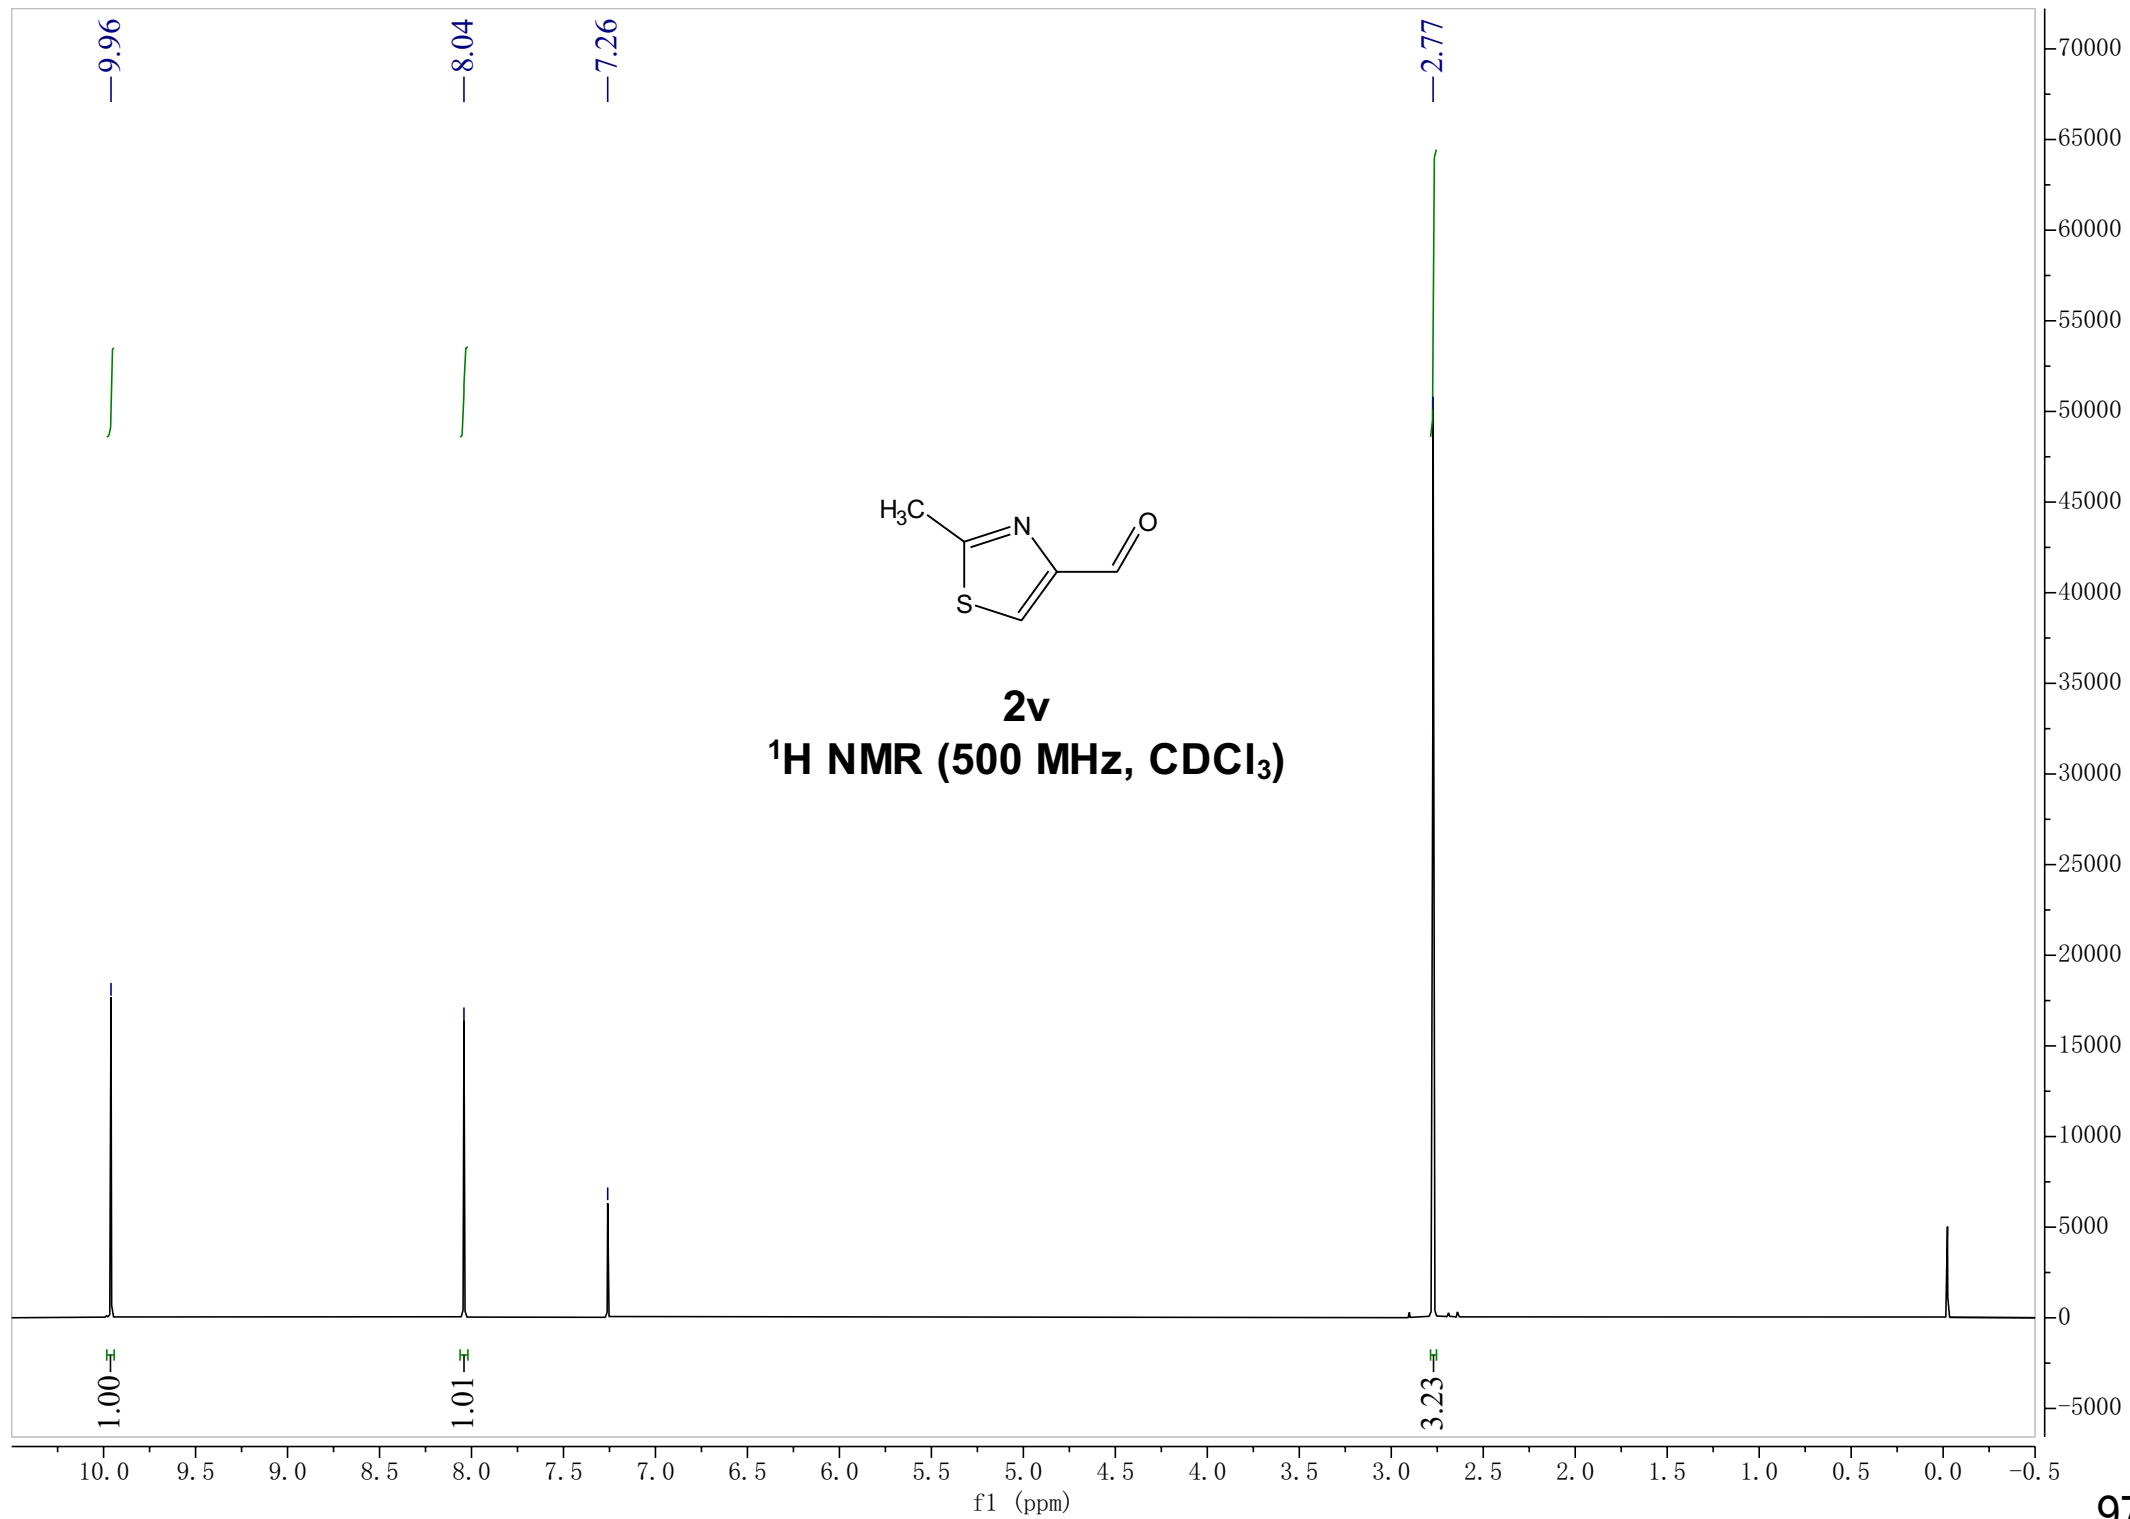

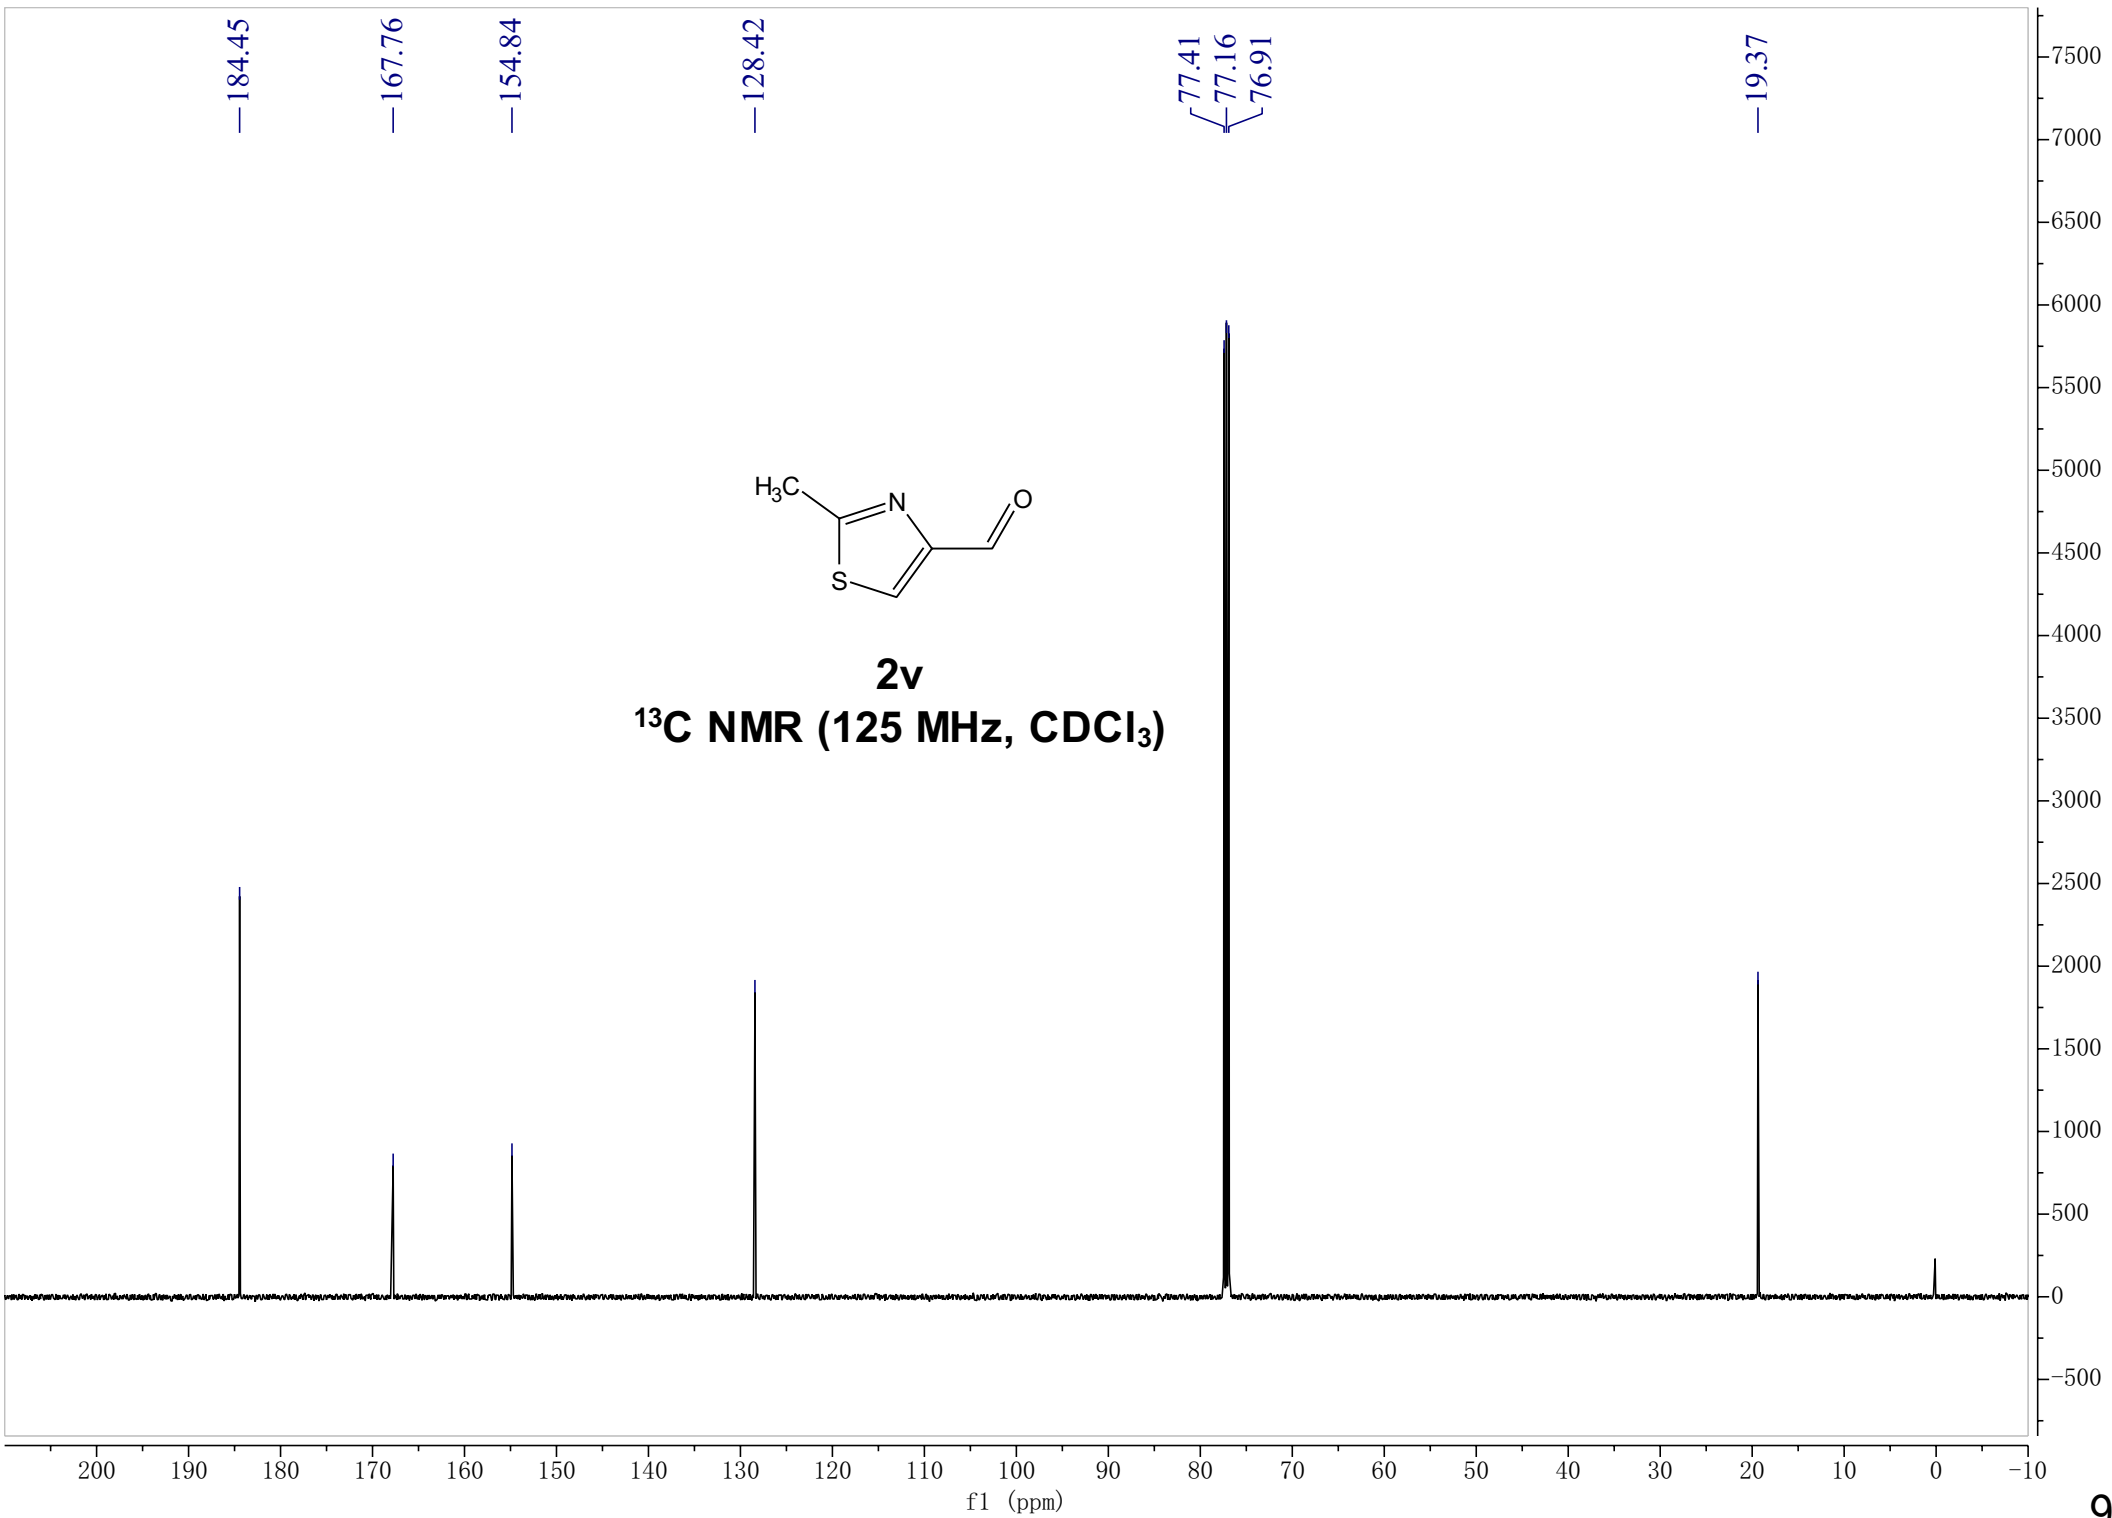

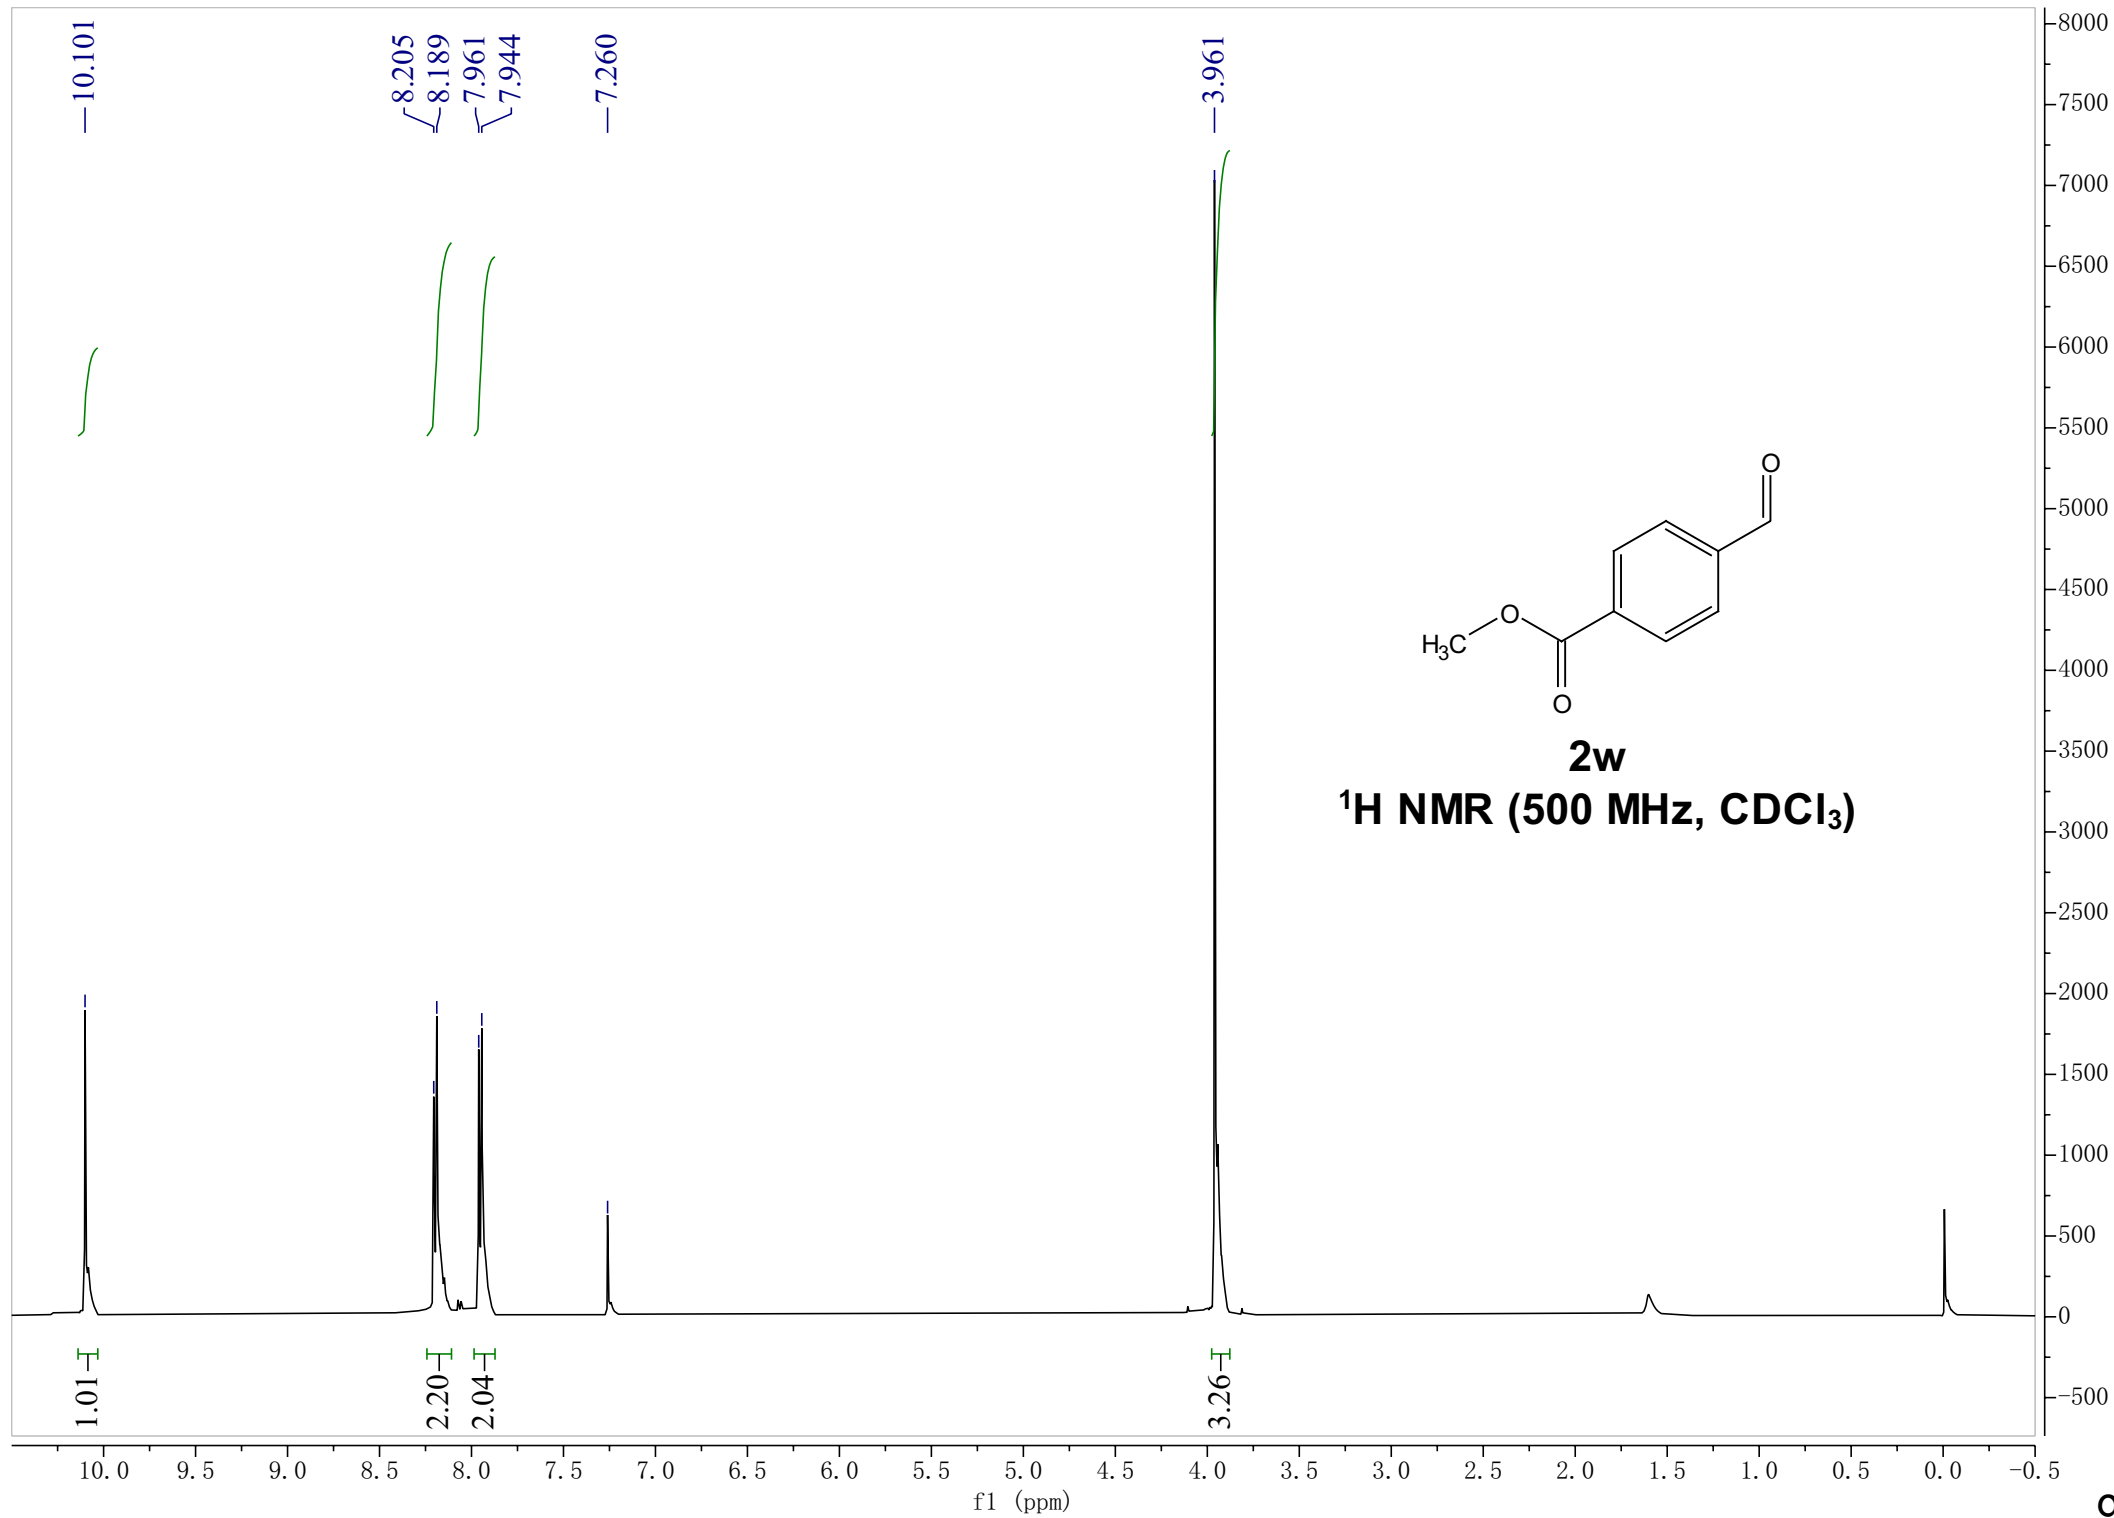

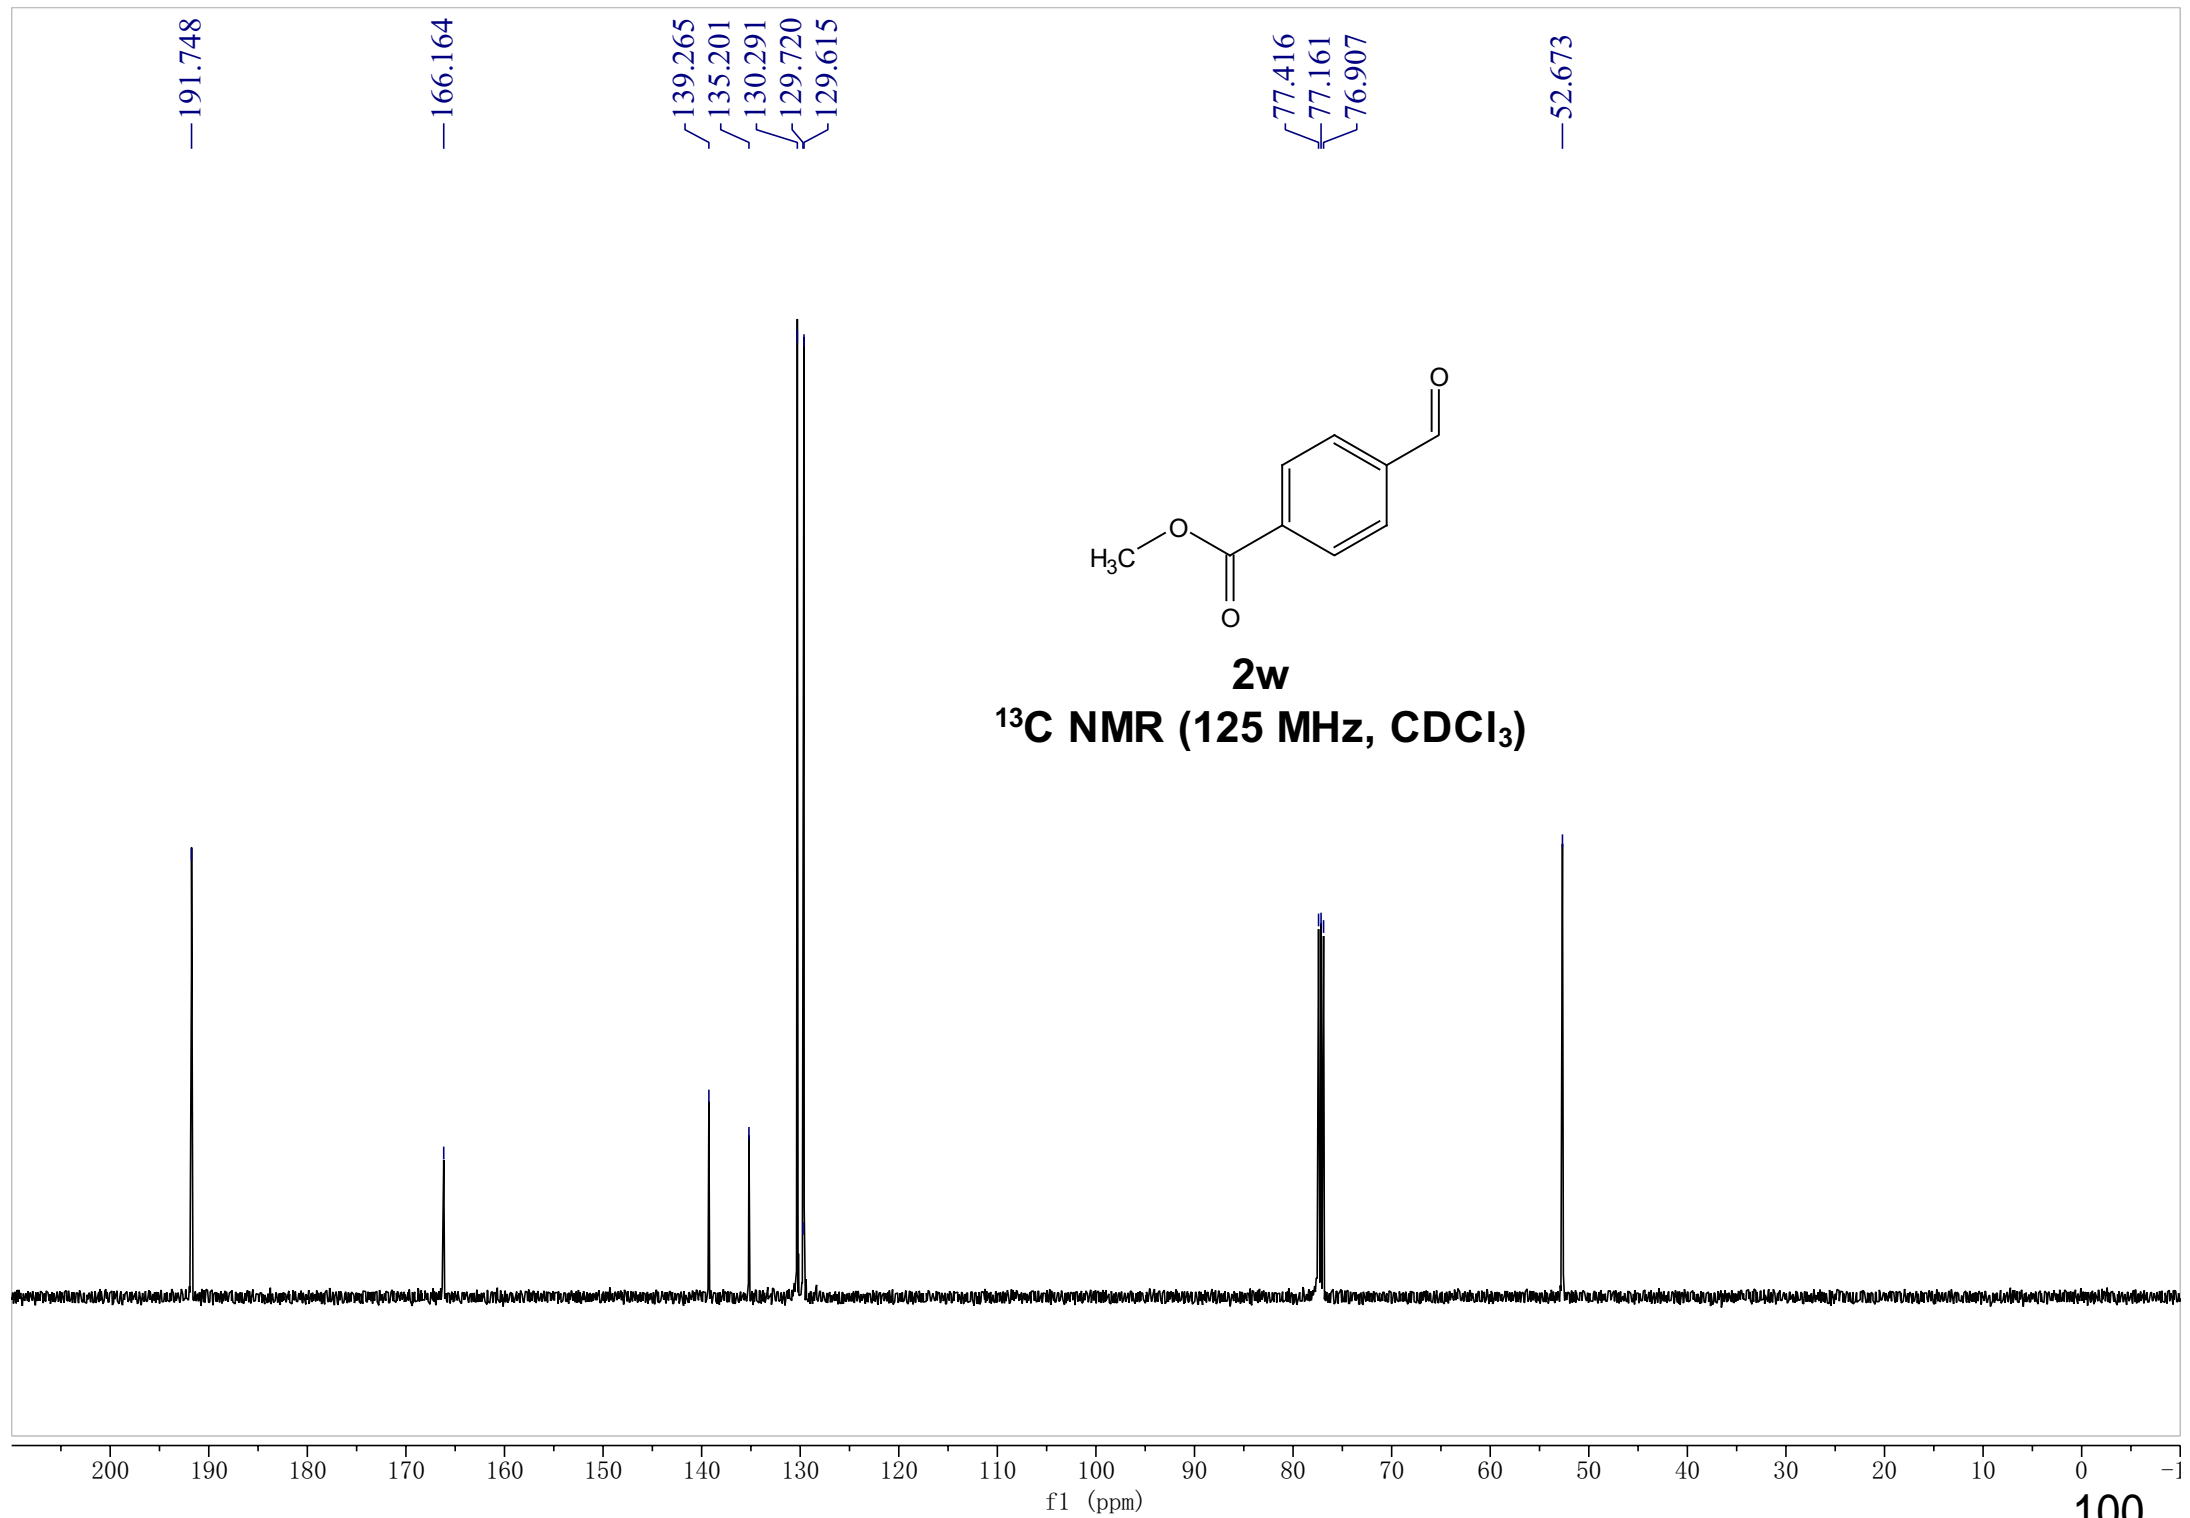

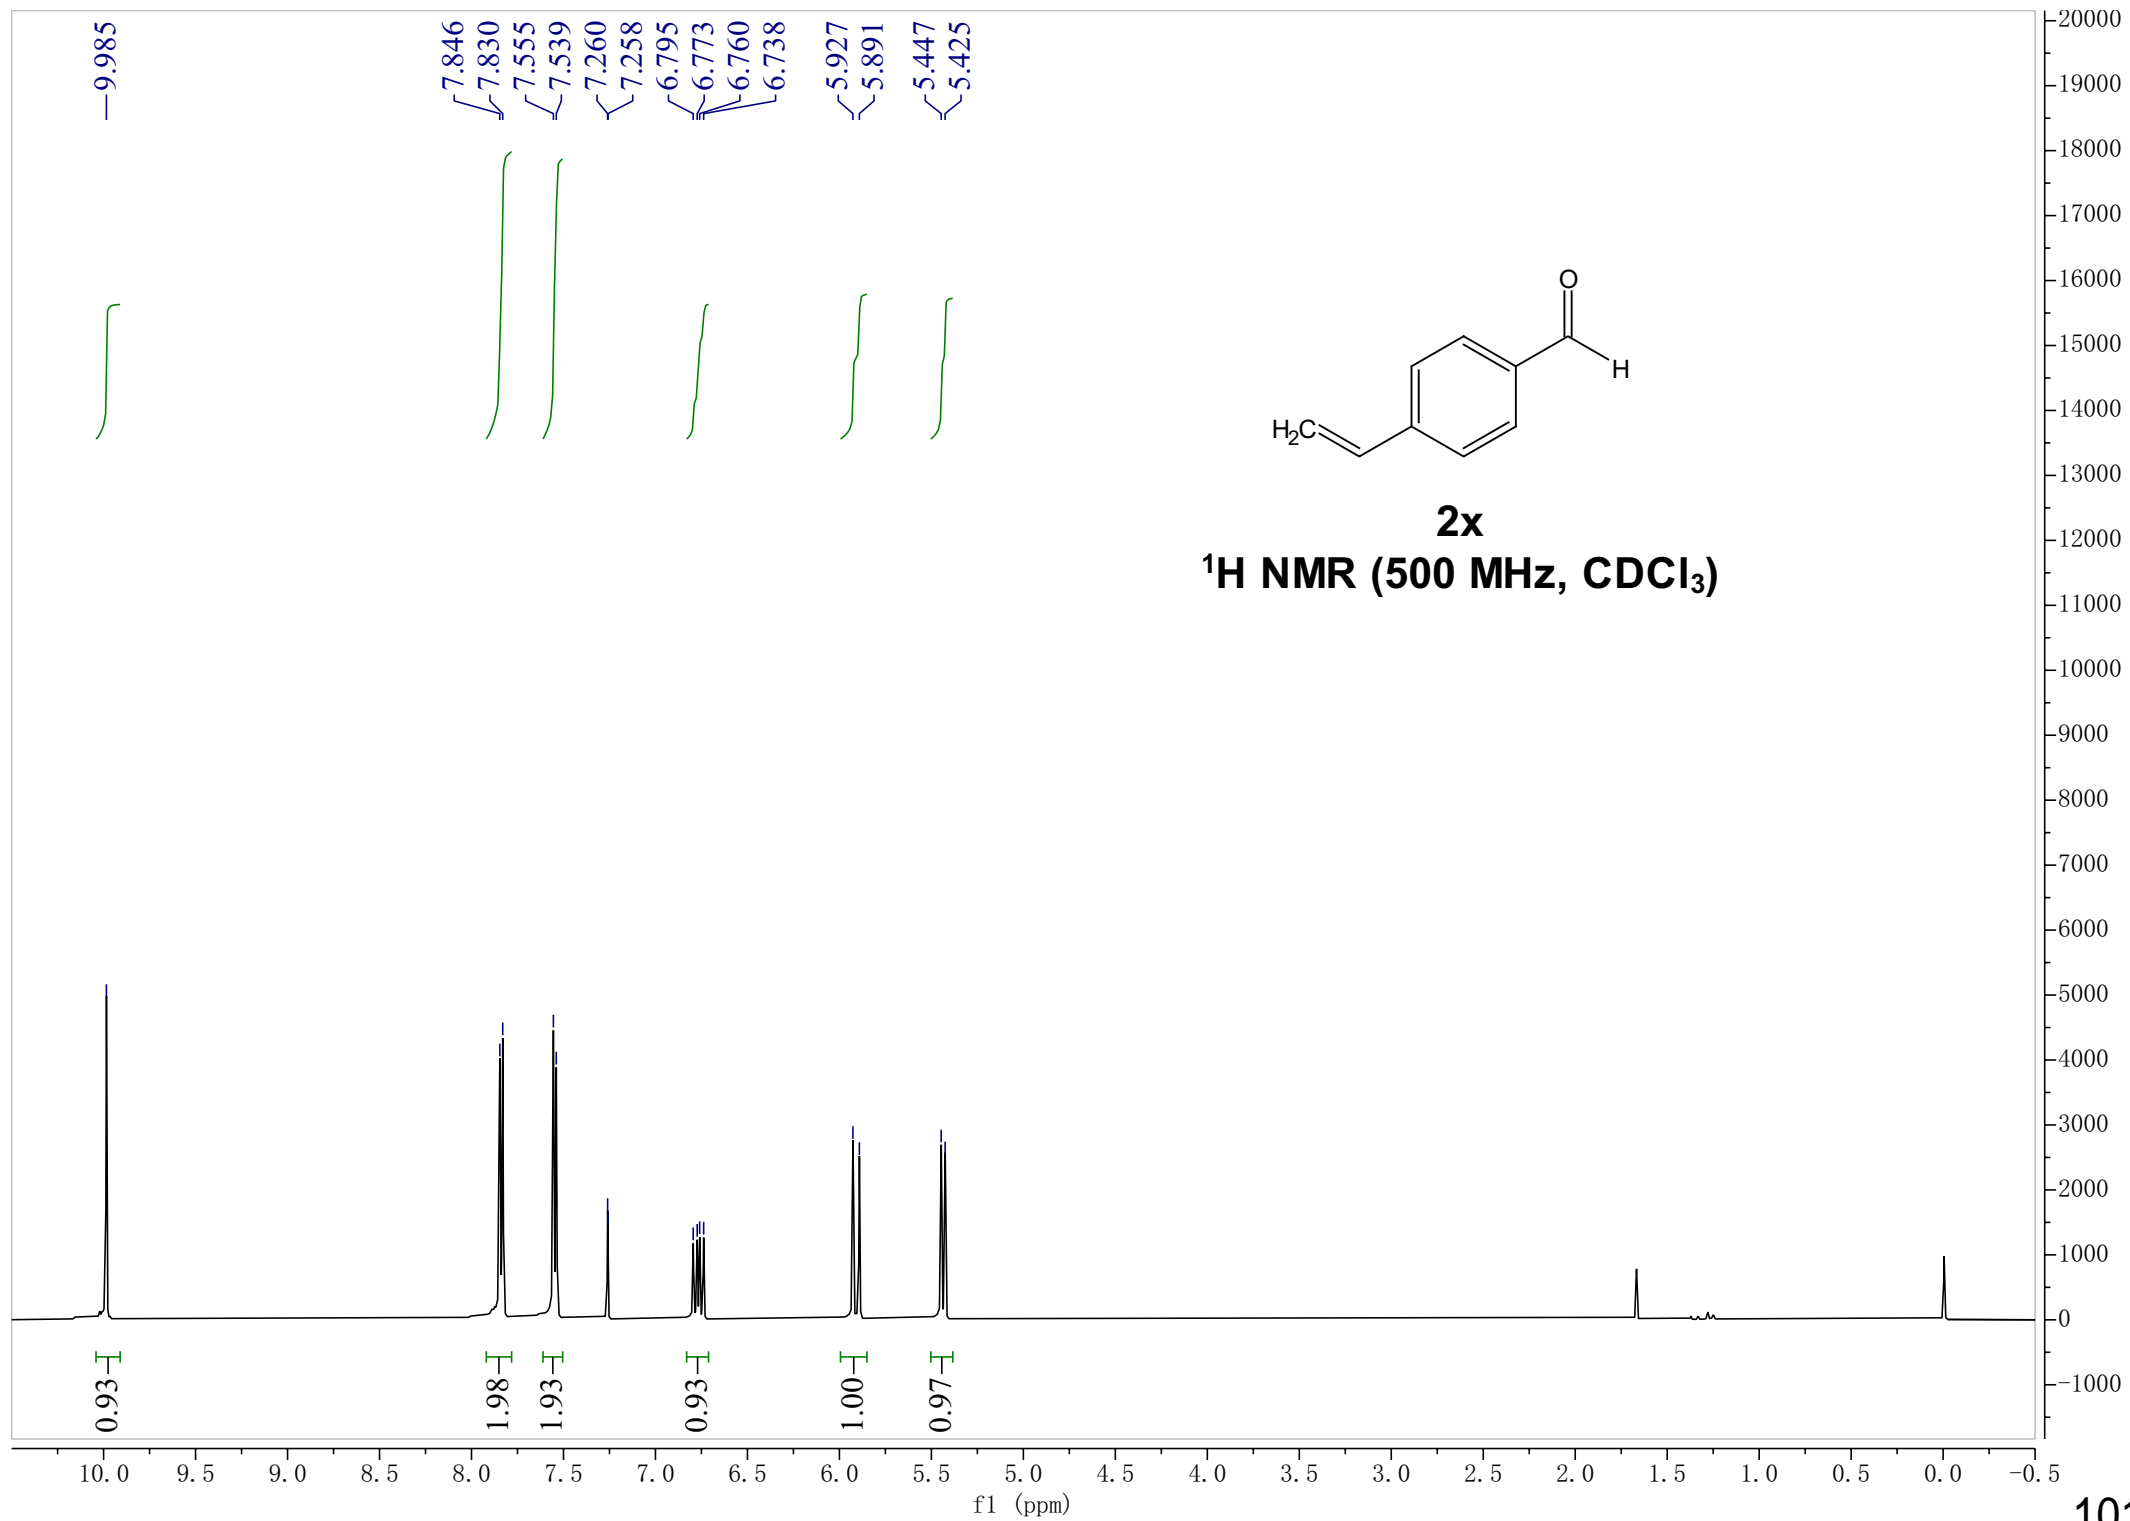

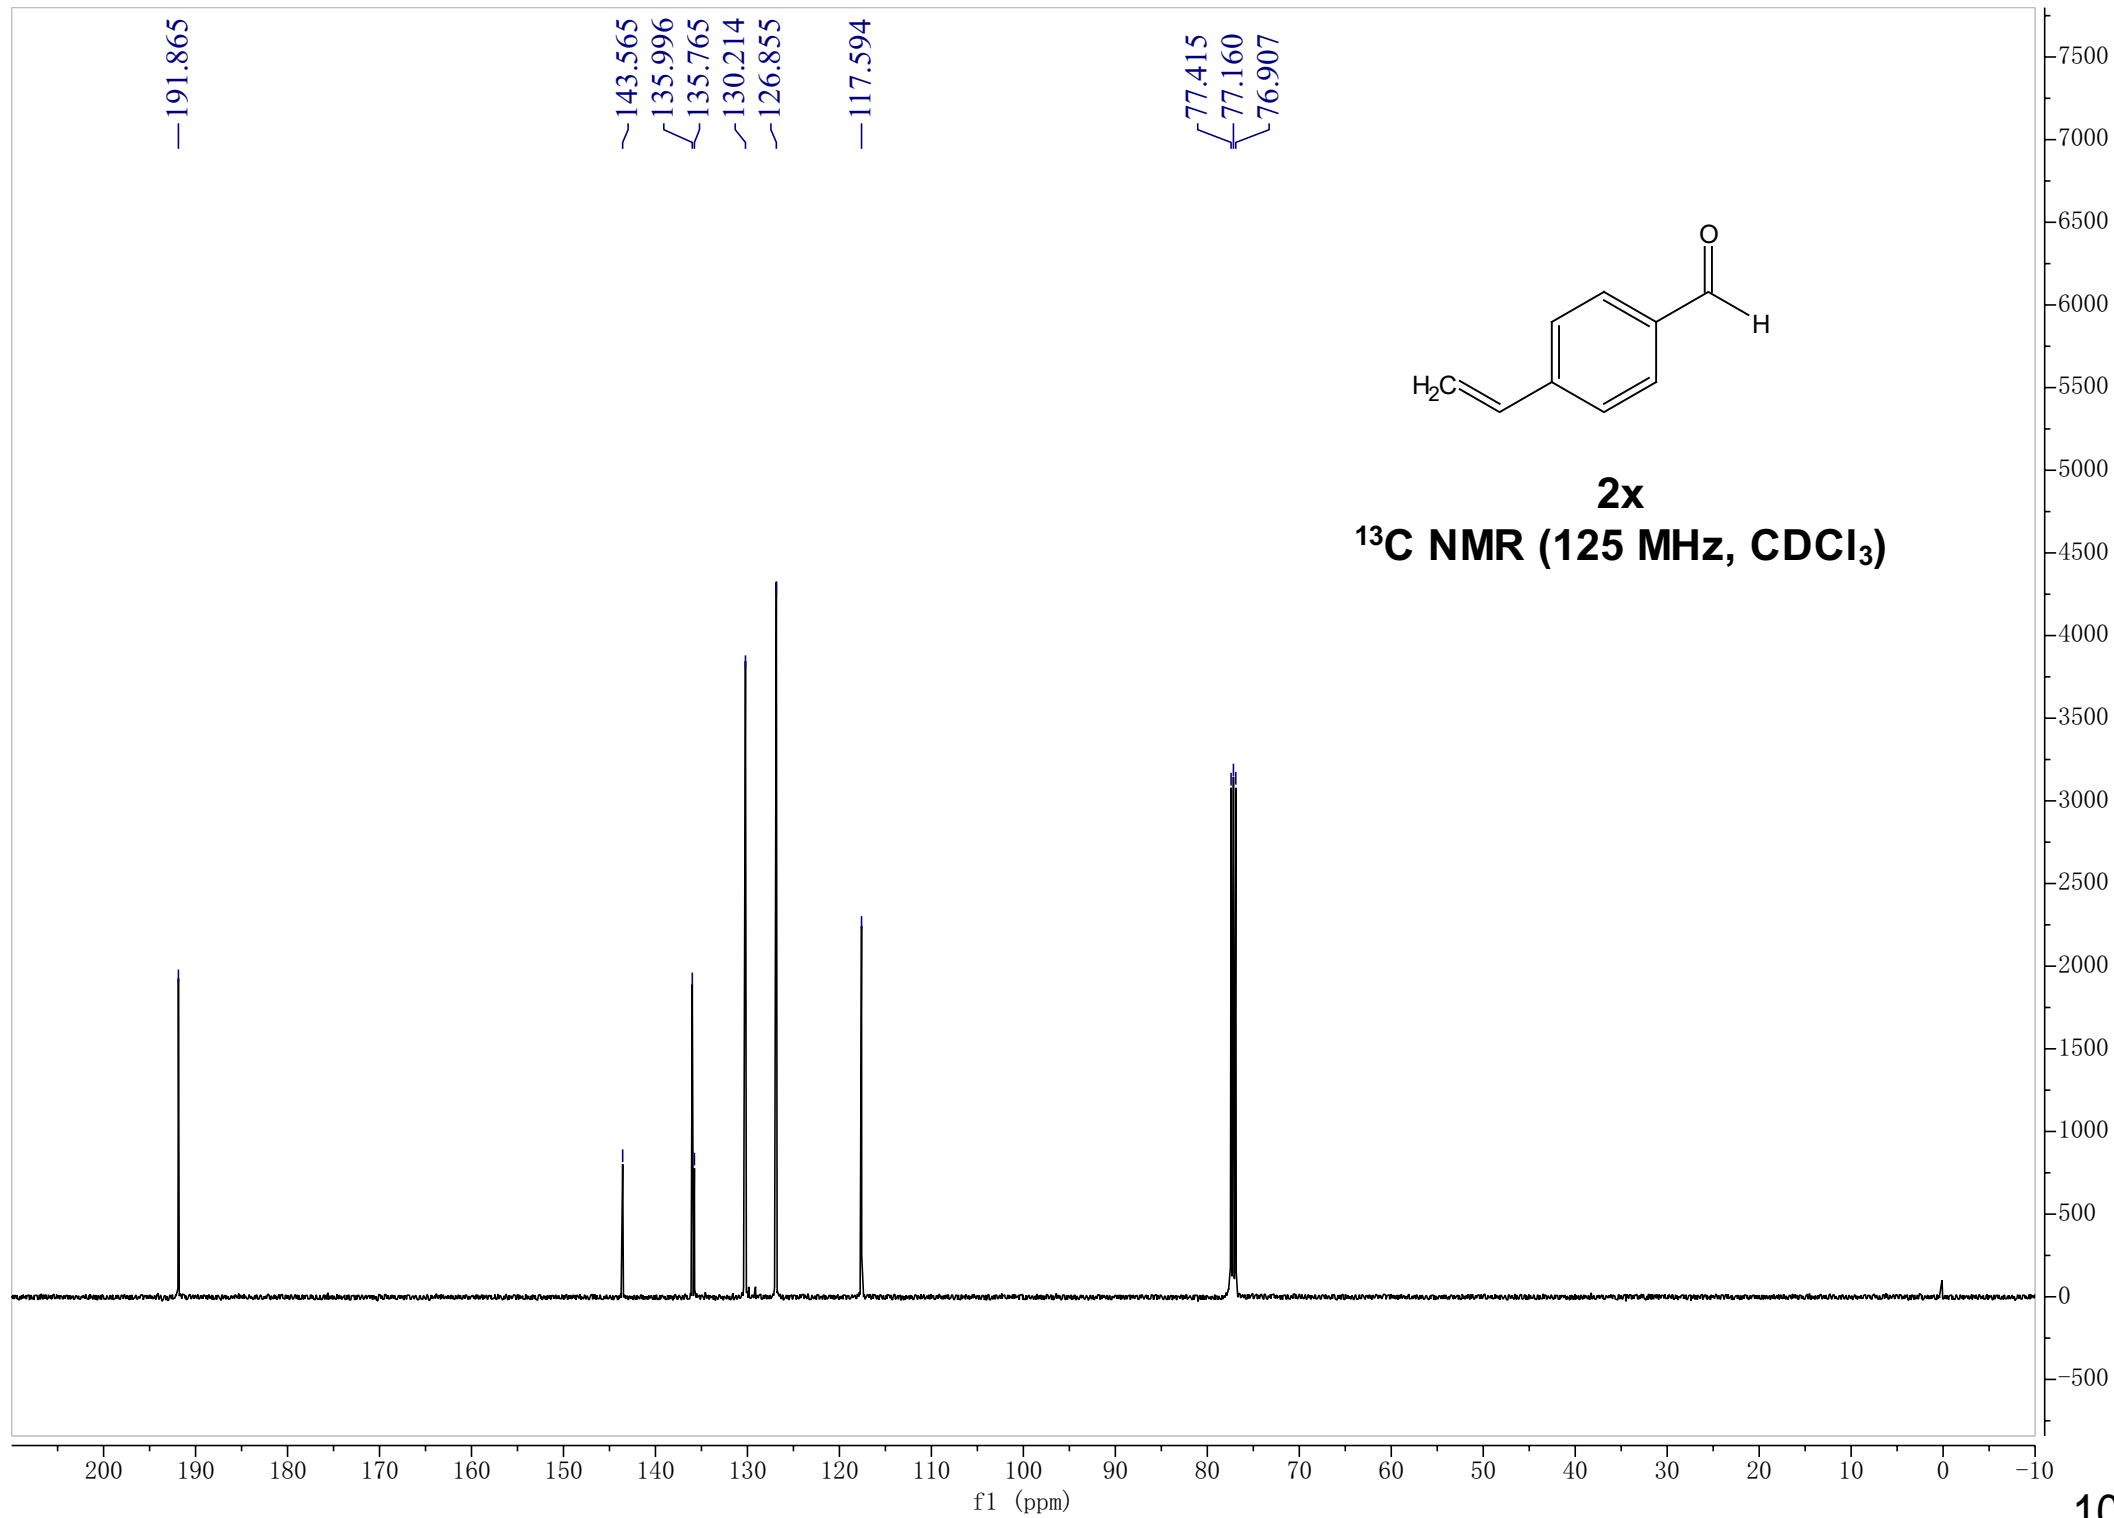

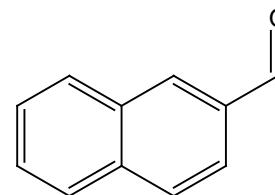

**2y**

**<sup>1</sup>H NMR (500 MHz, CDCl<sub>3</sub>)**

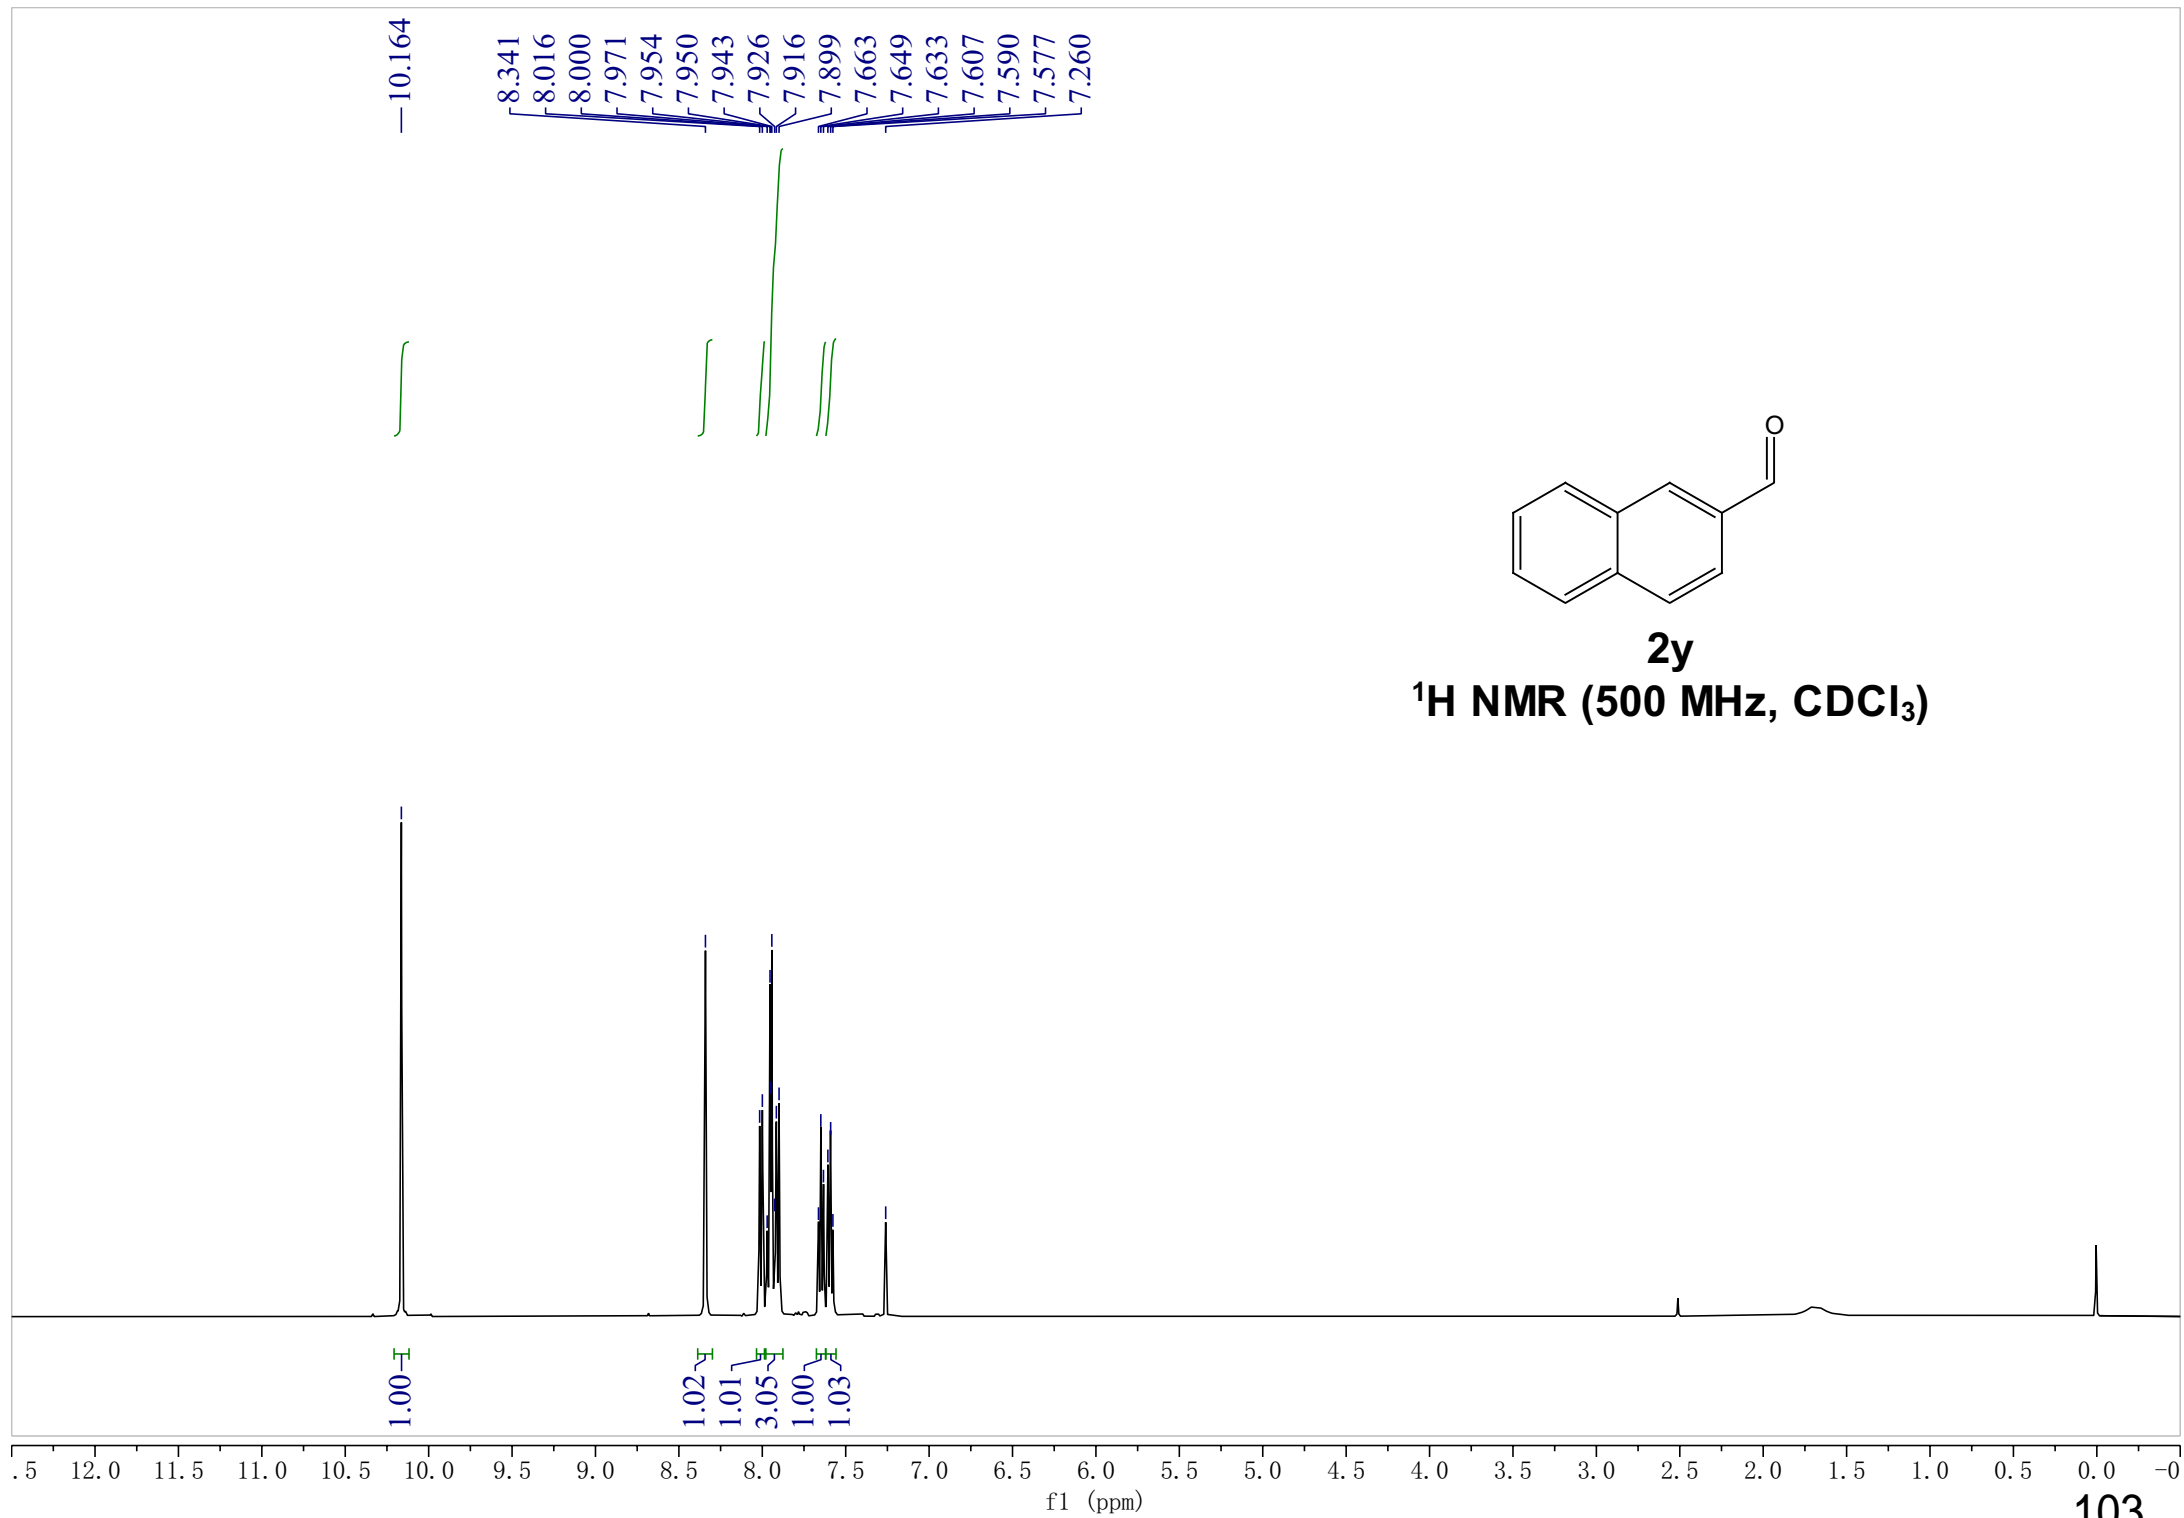



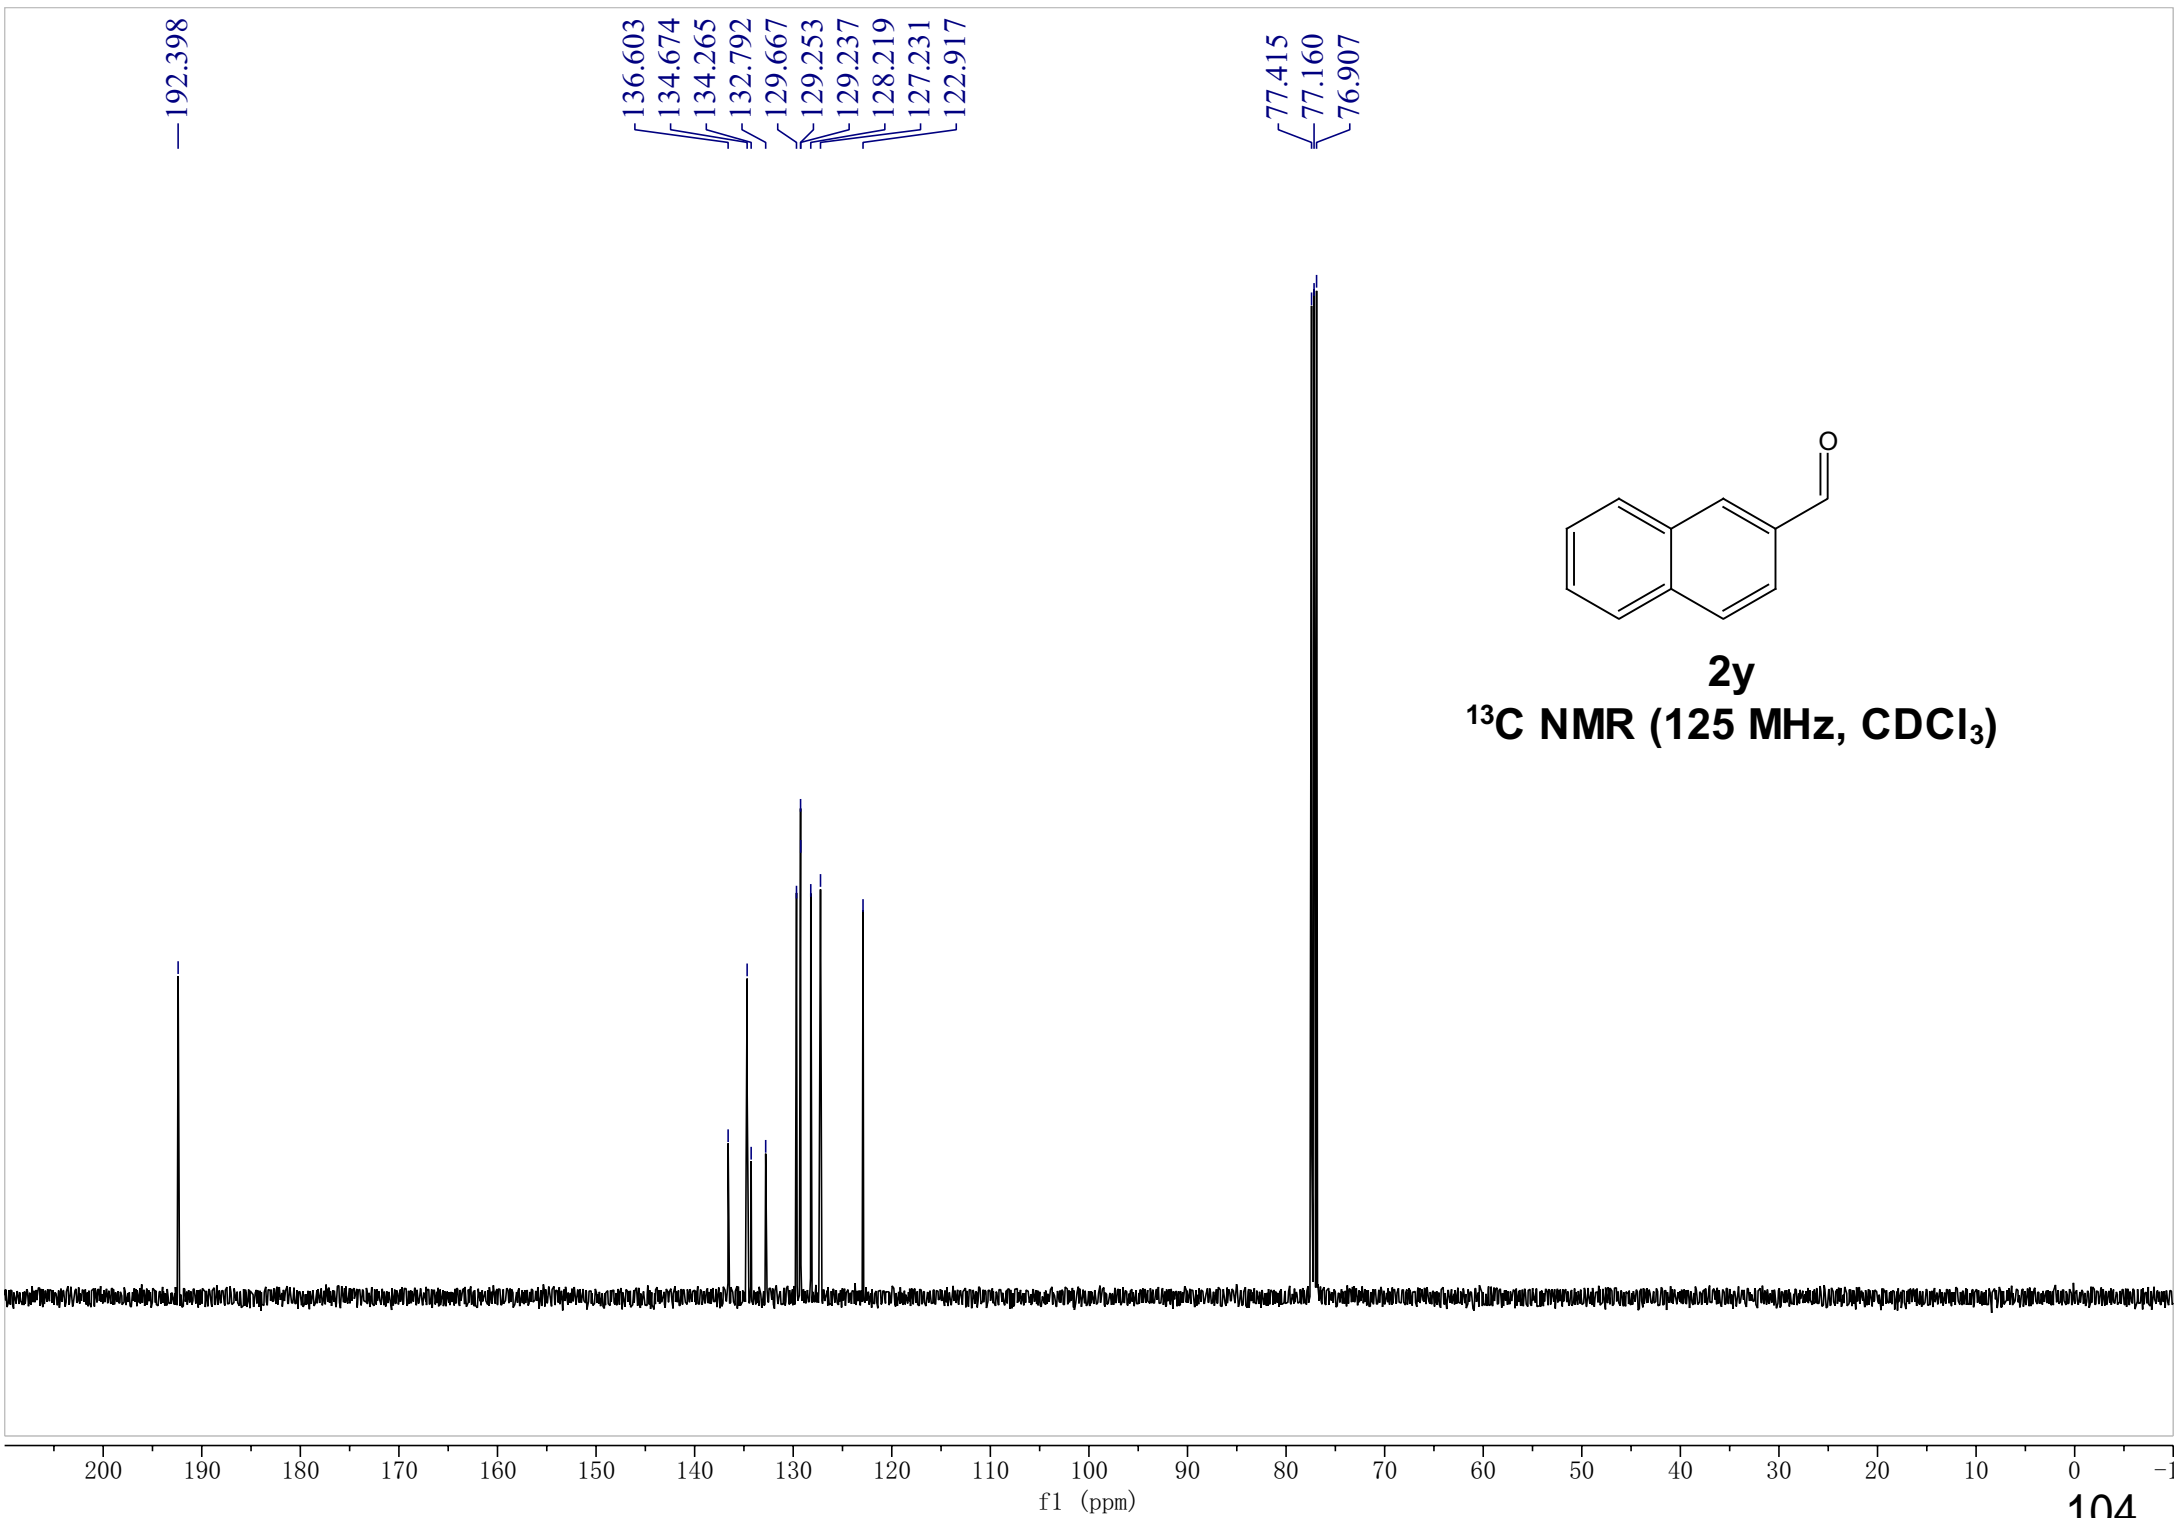

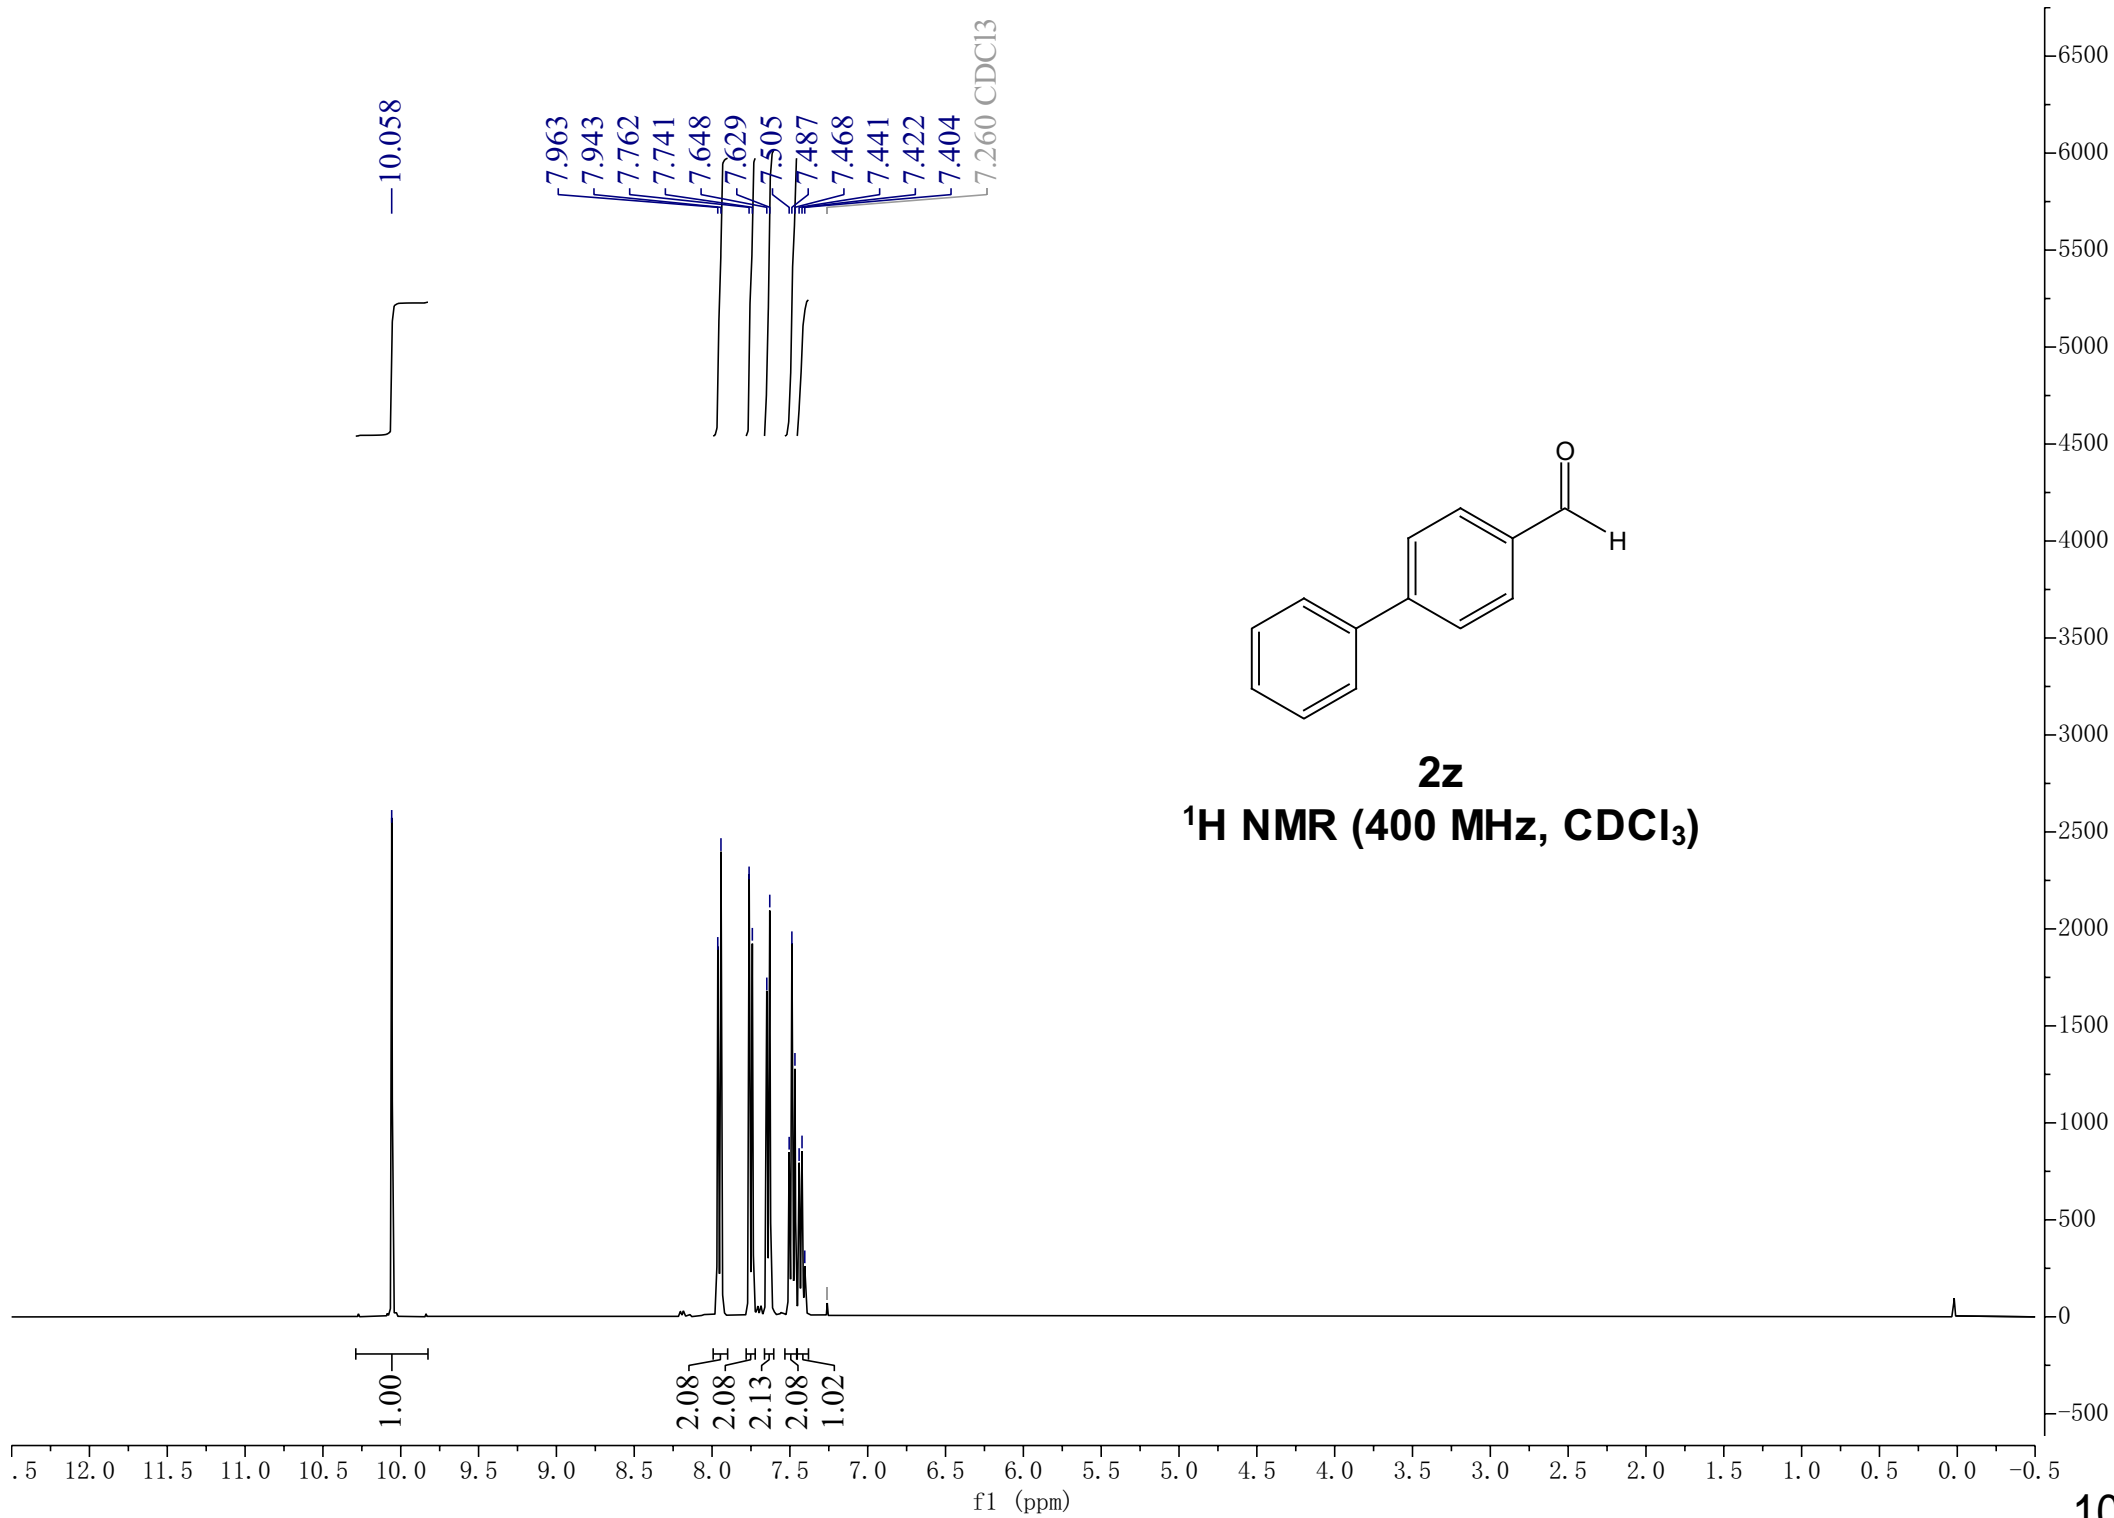

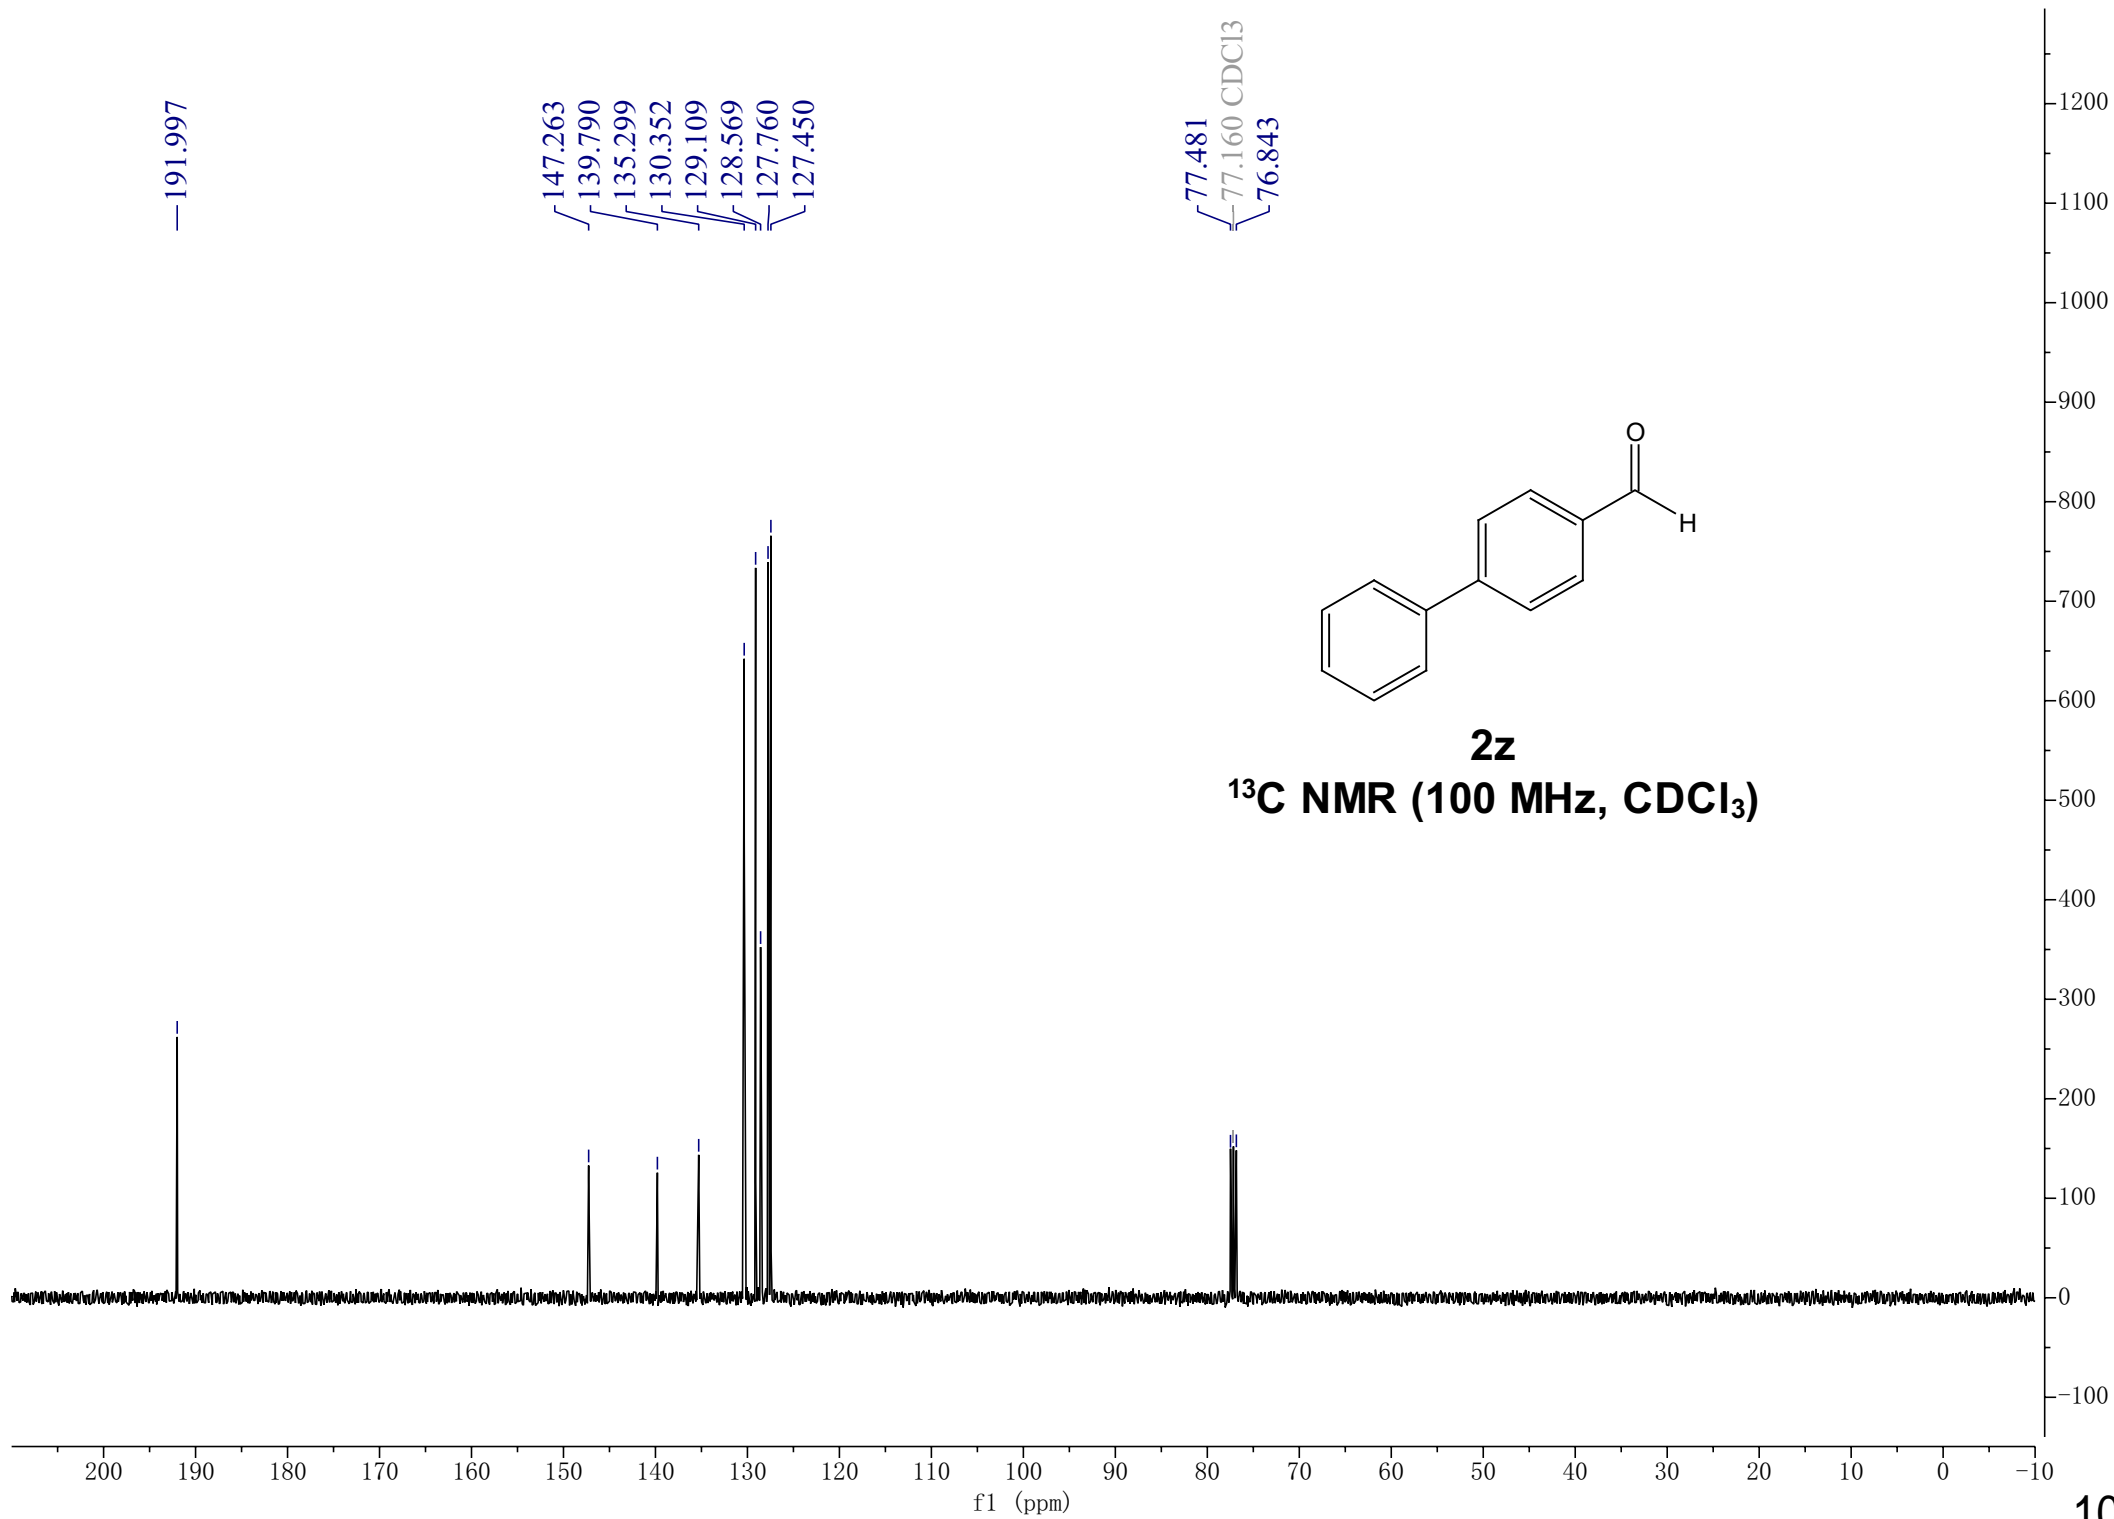

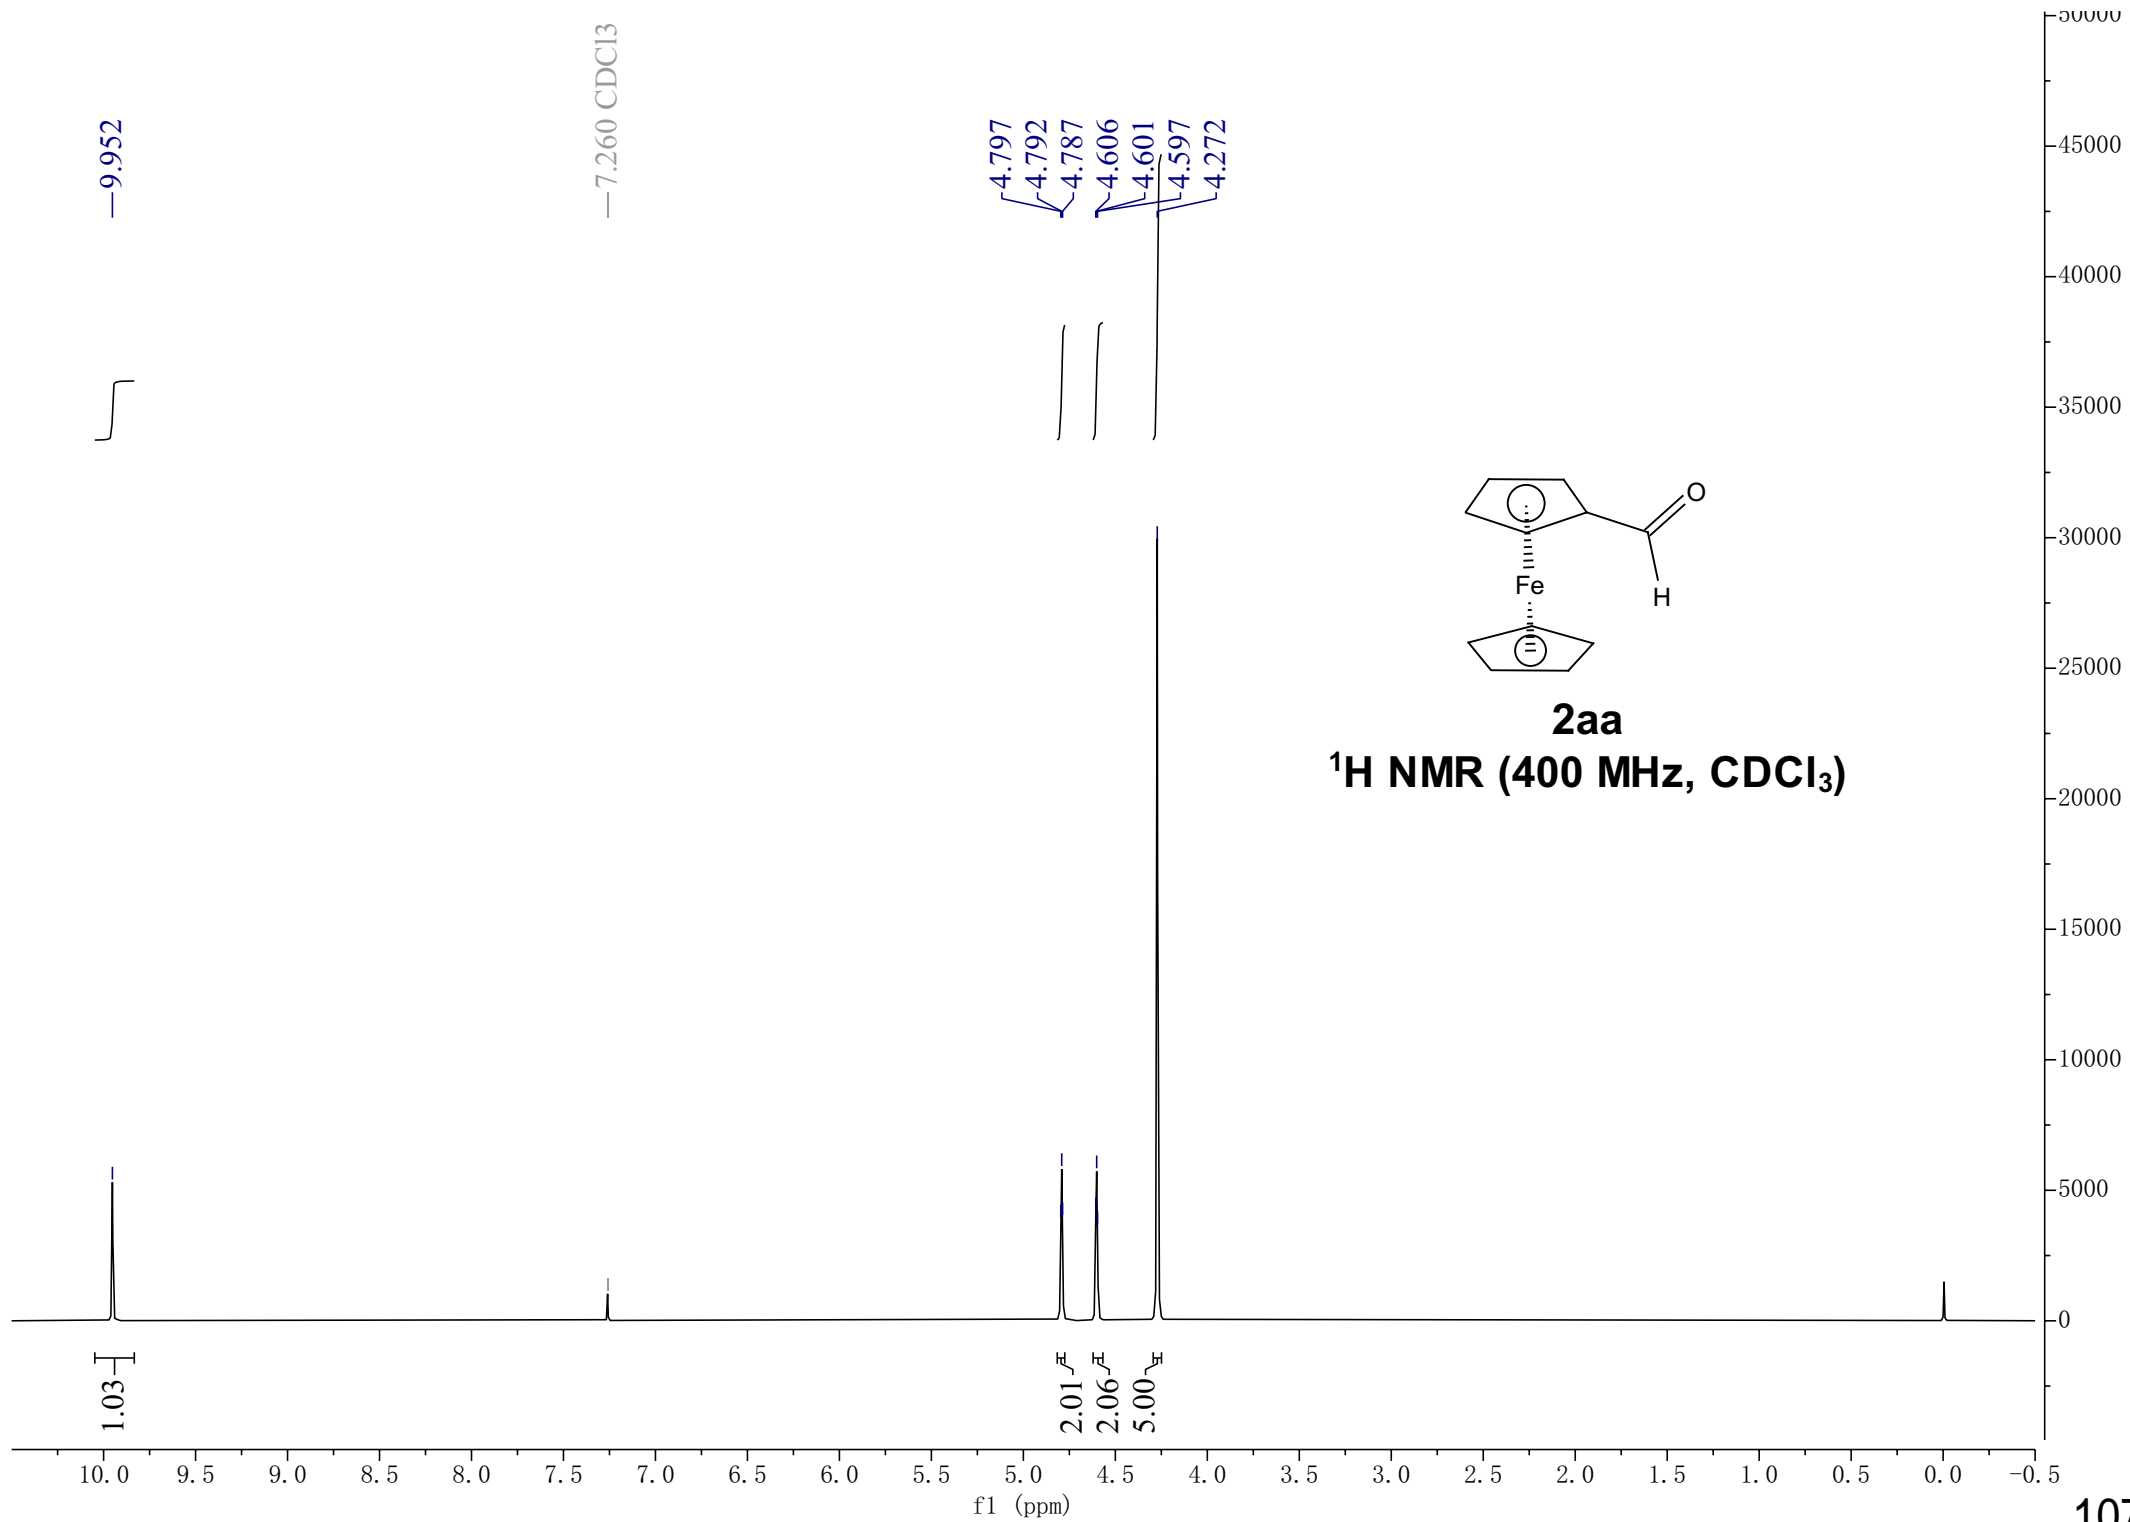

—193.569

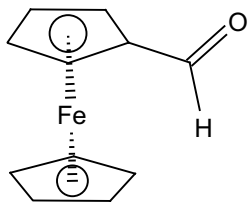

**2aa**

**$^{13}\text{C}$  NMR (100 MHz,  $\text{CDCl}_3$ )**

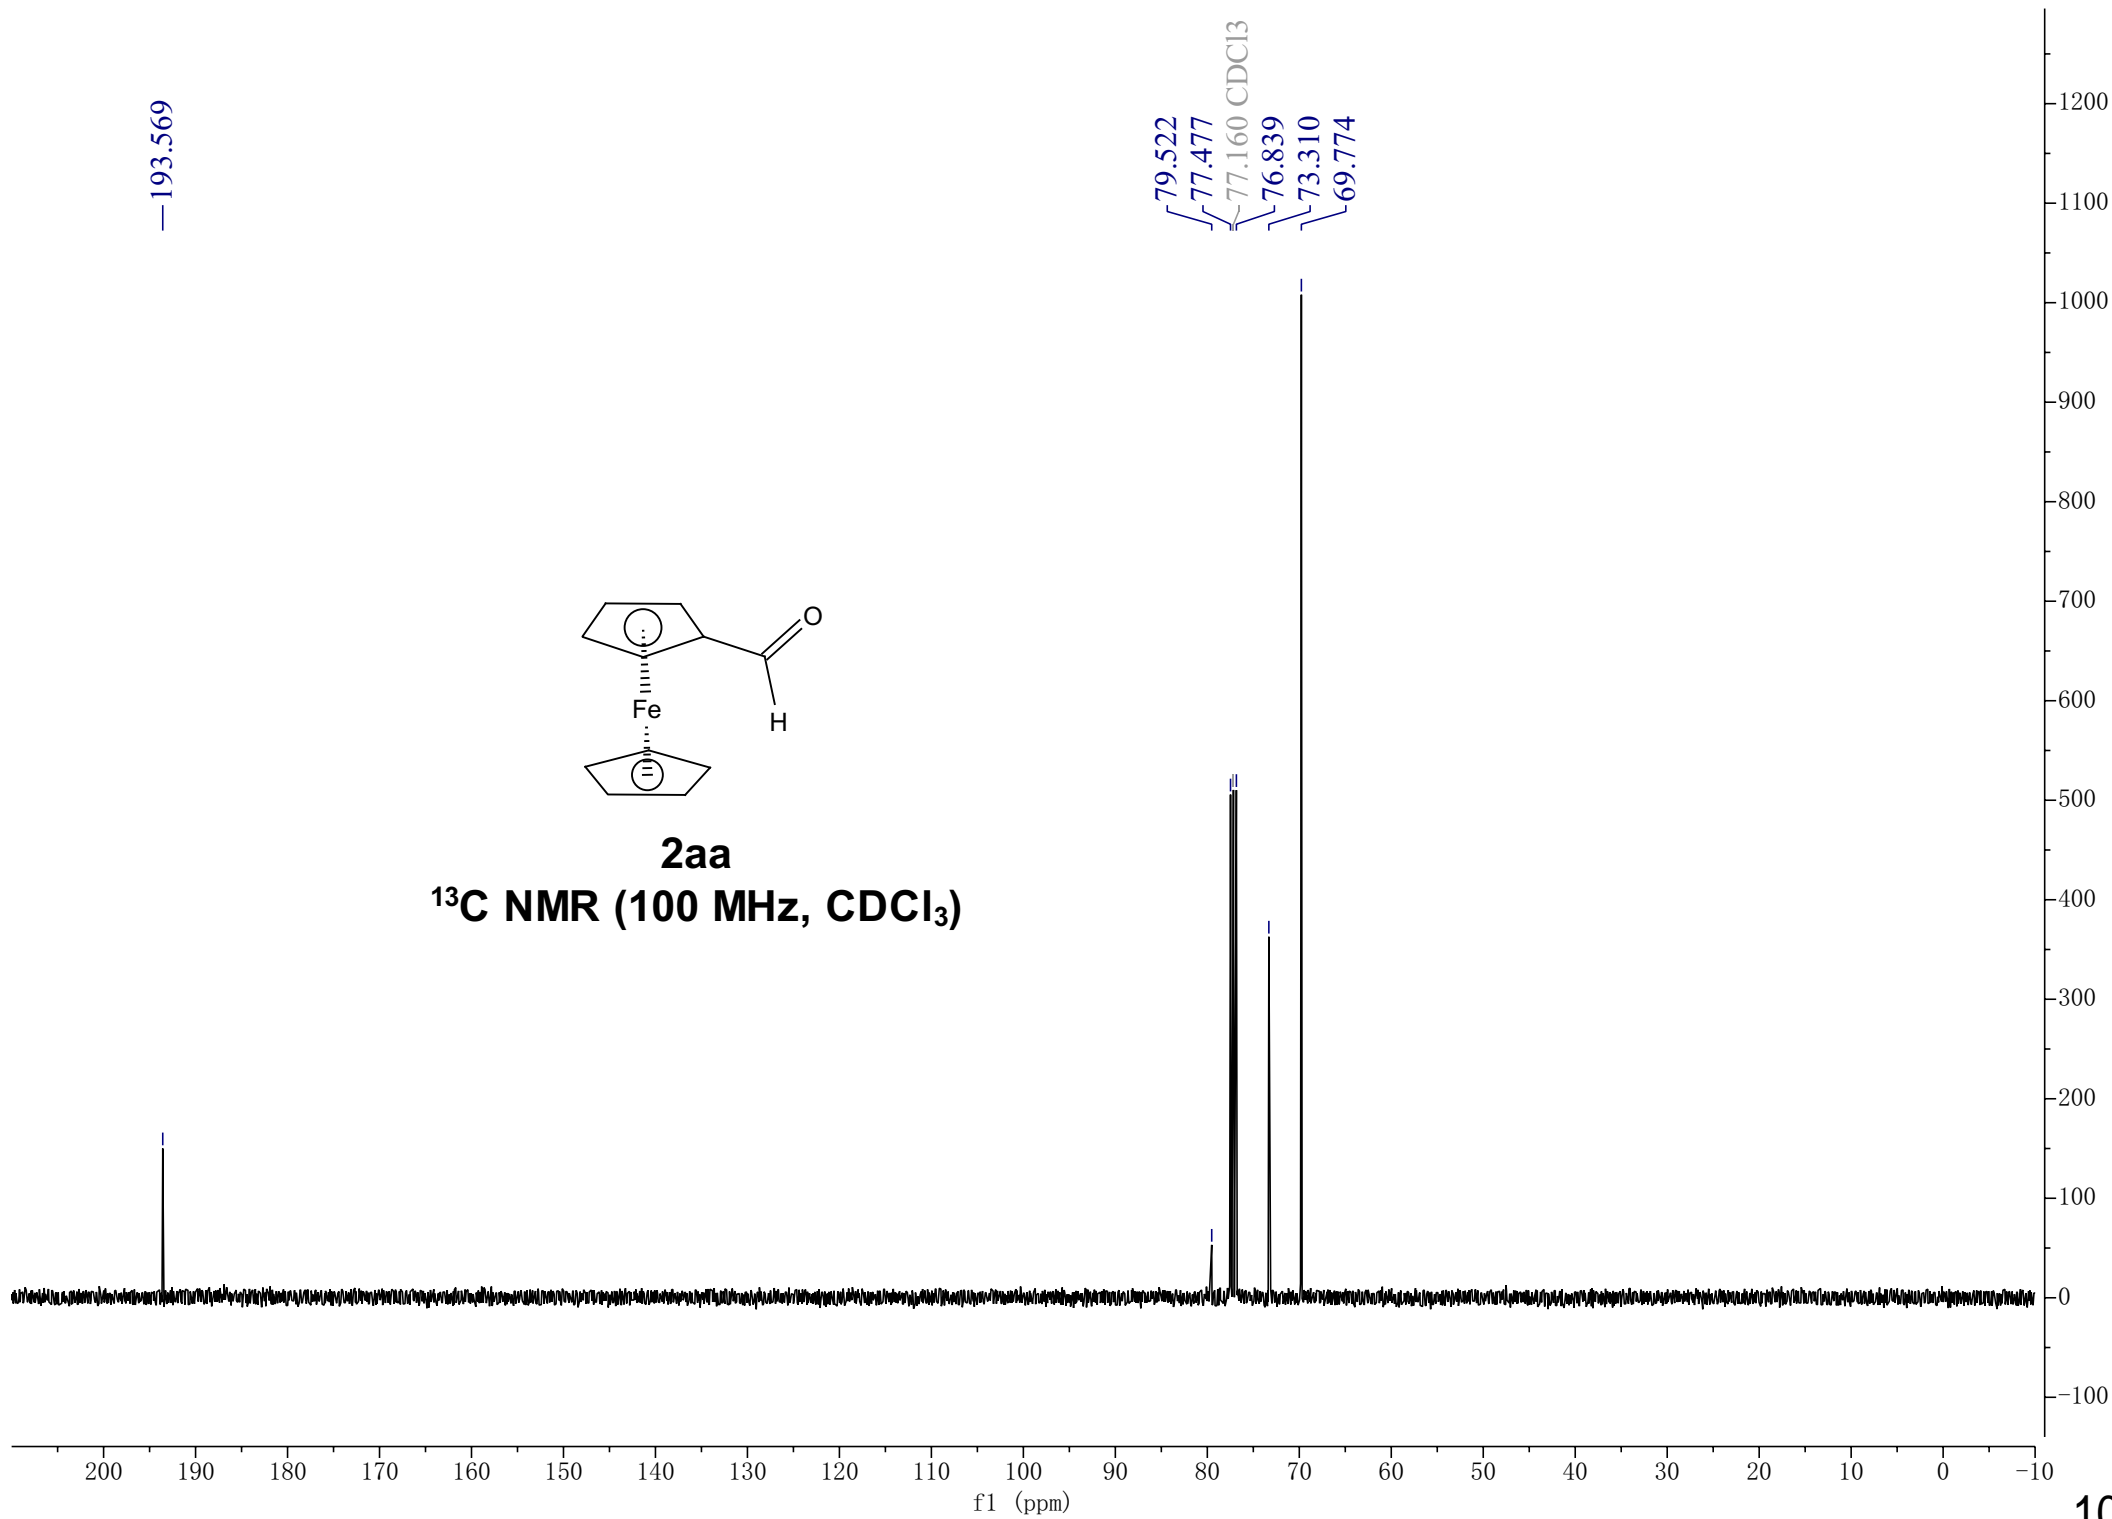

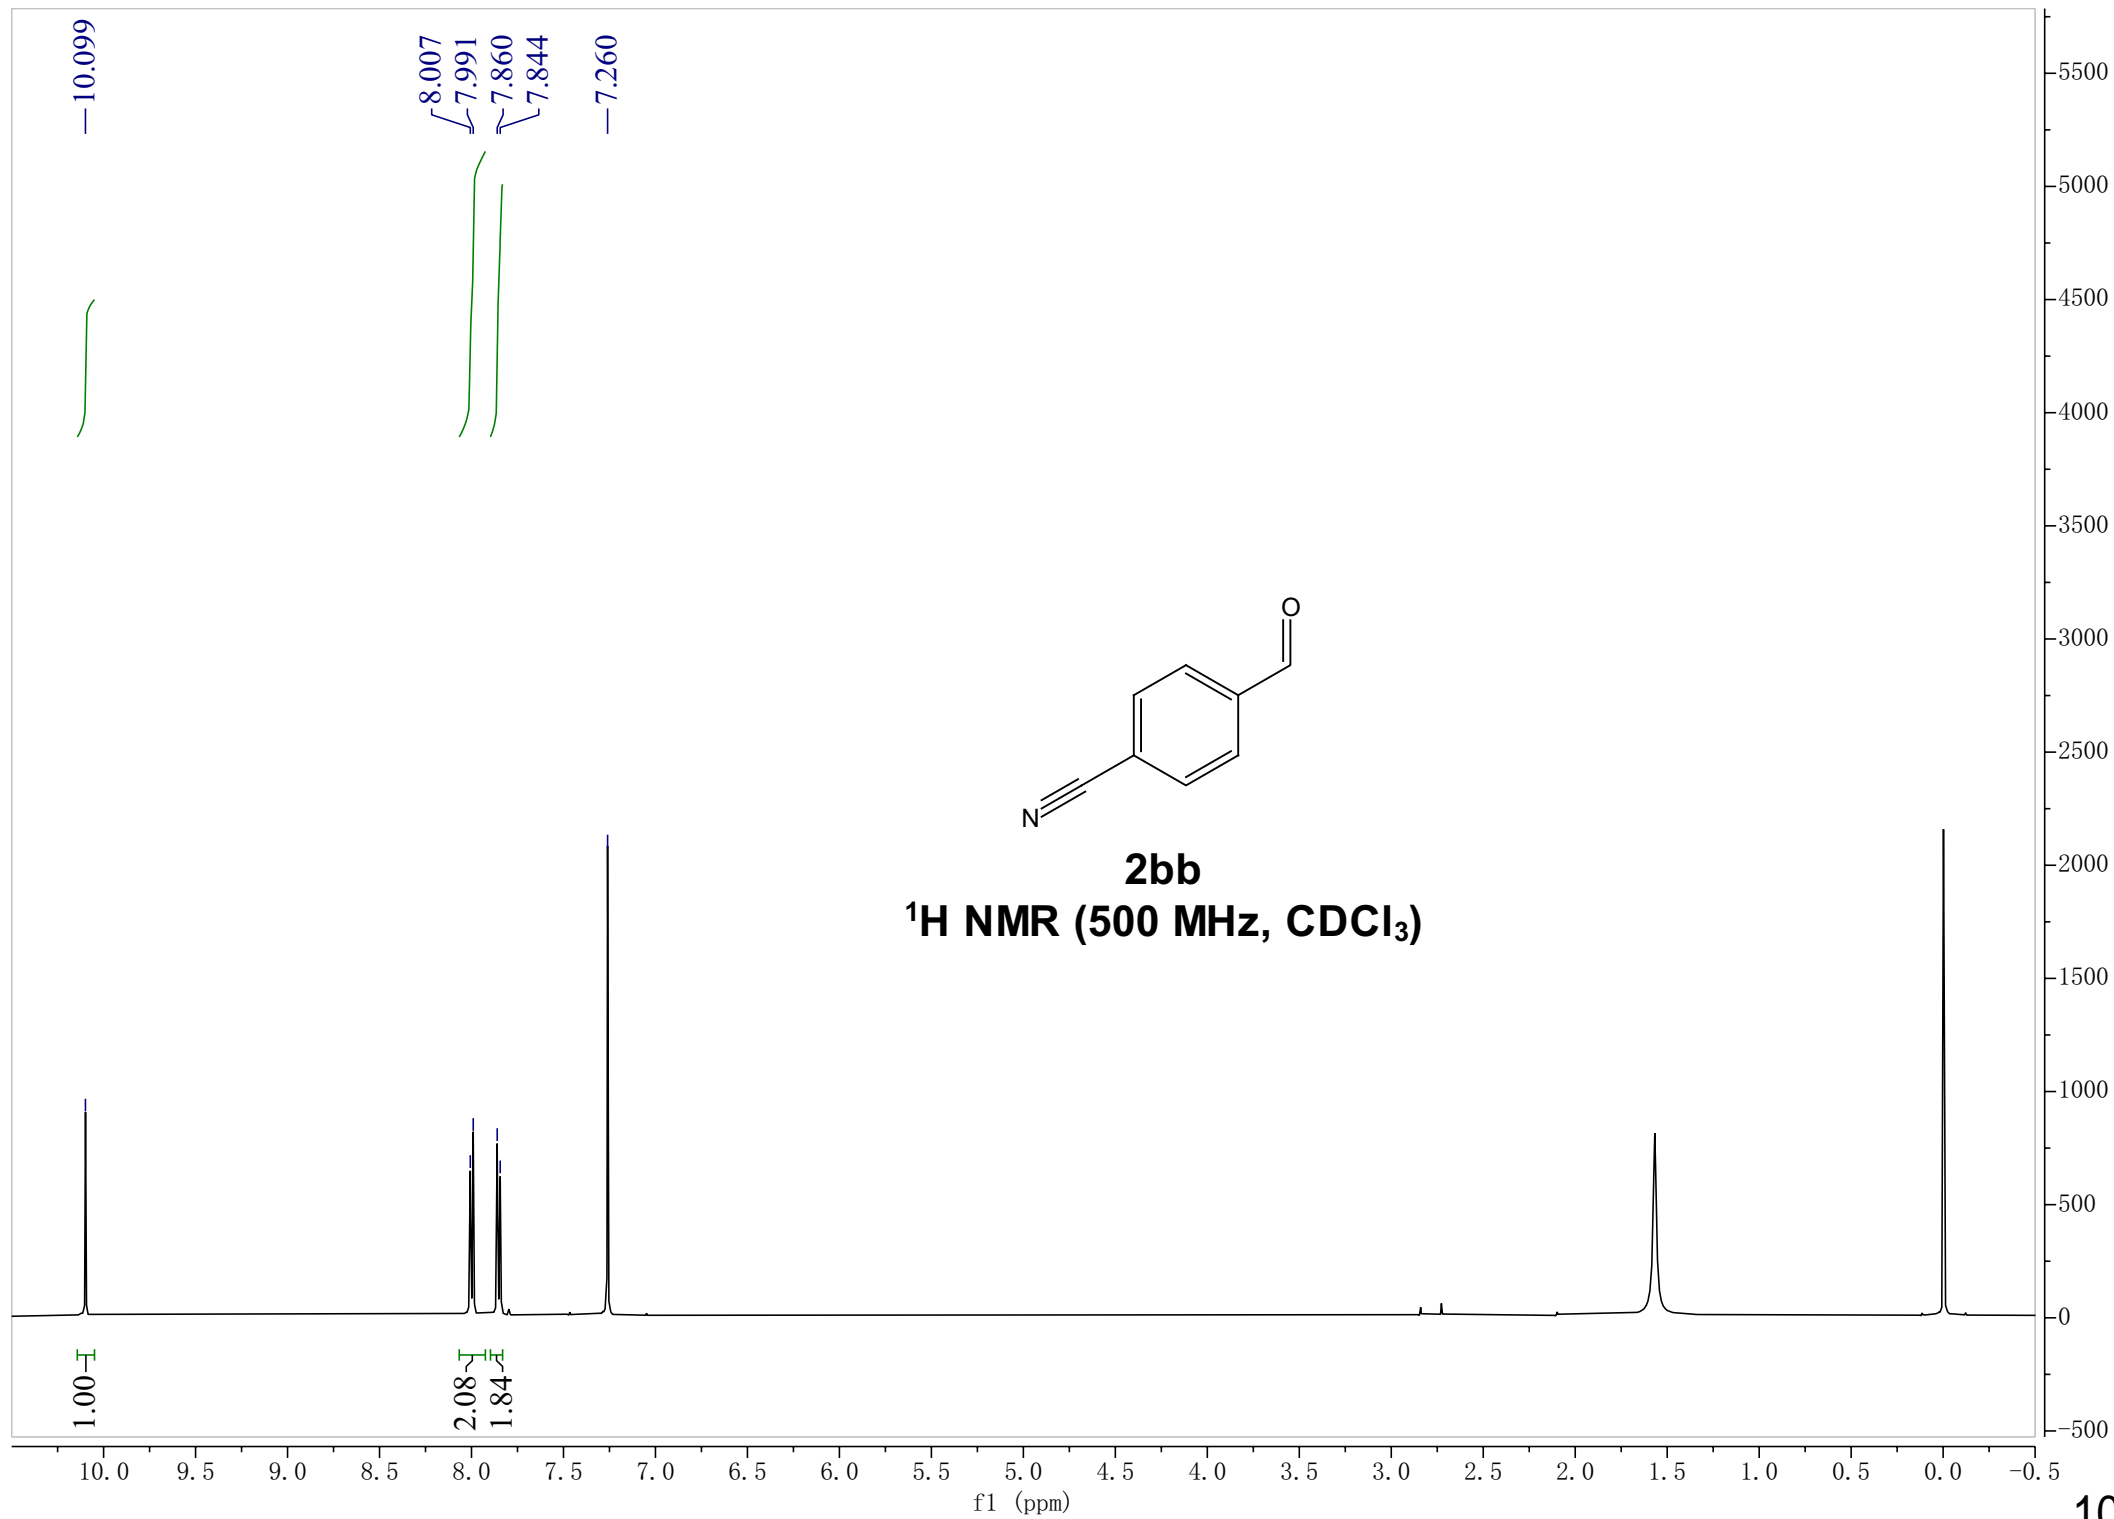

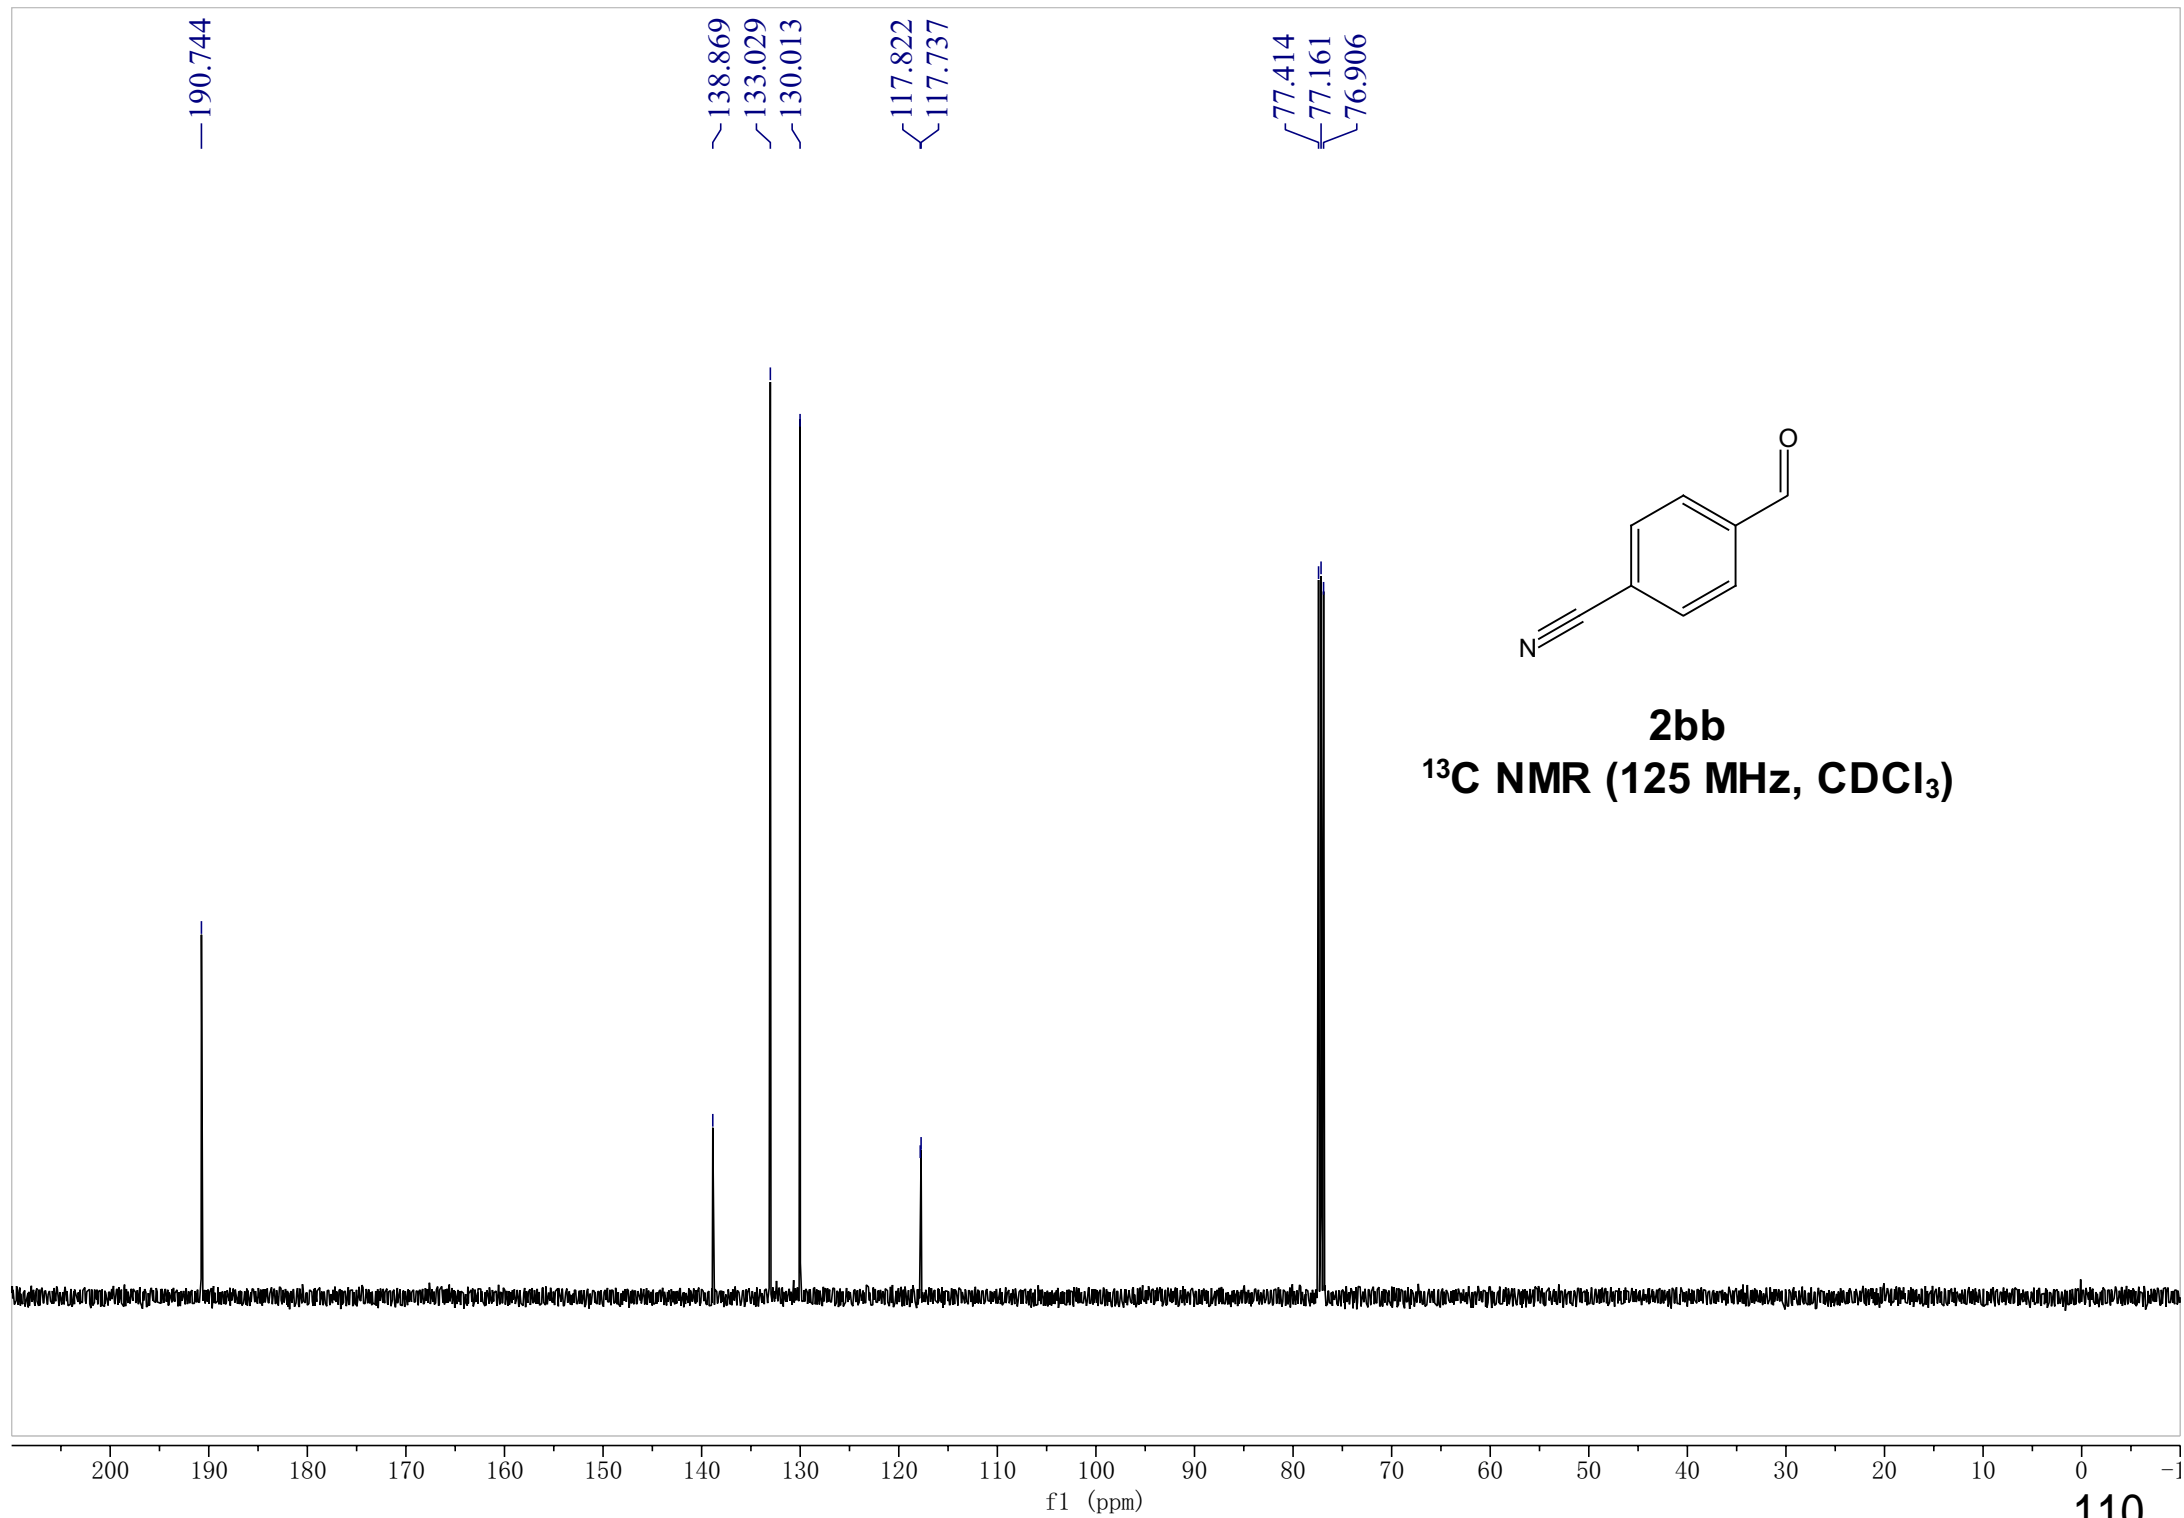

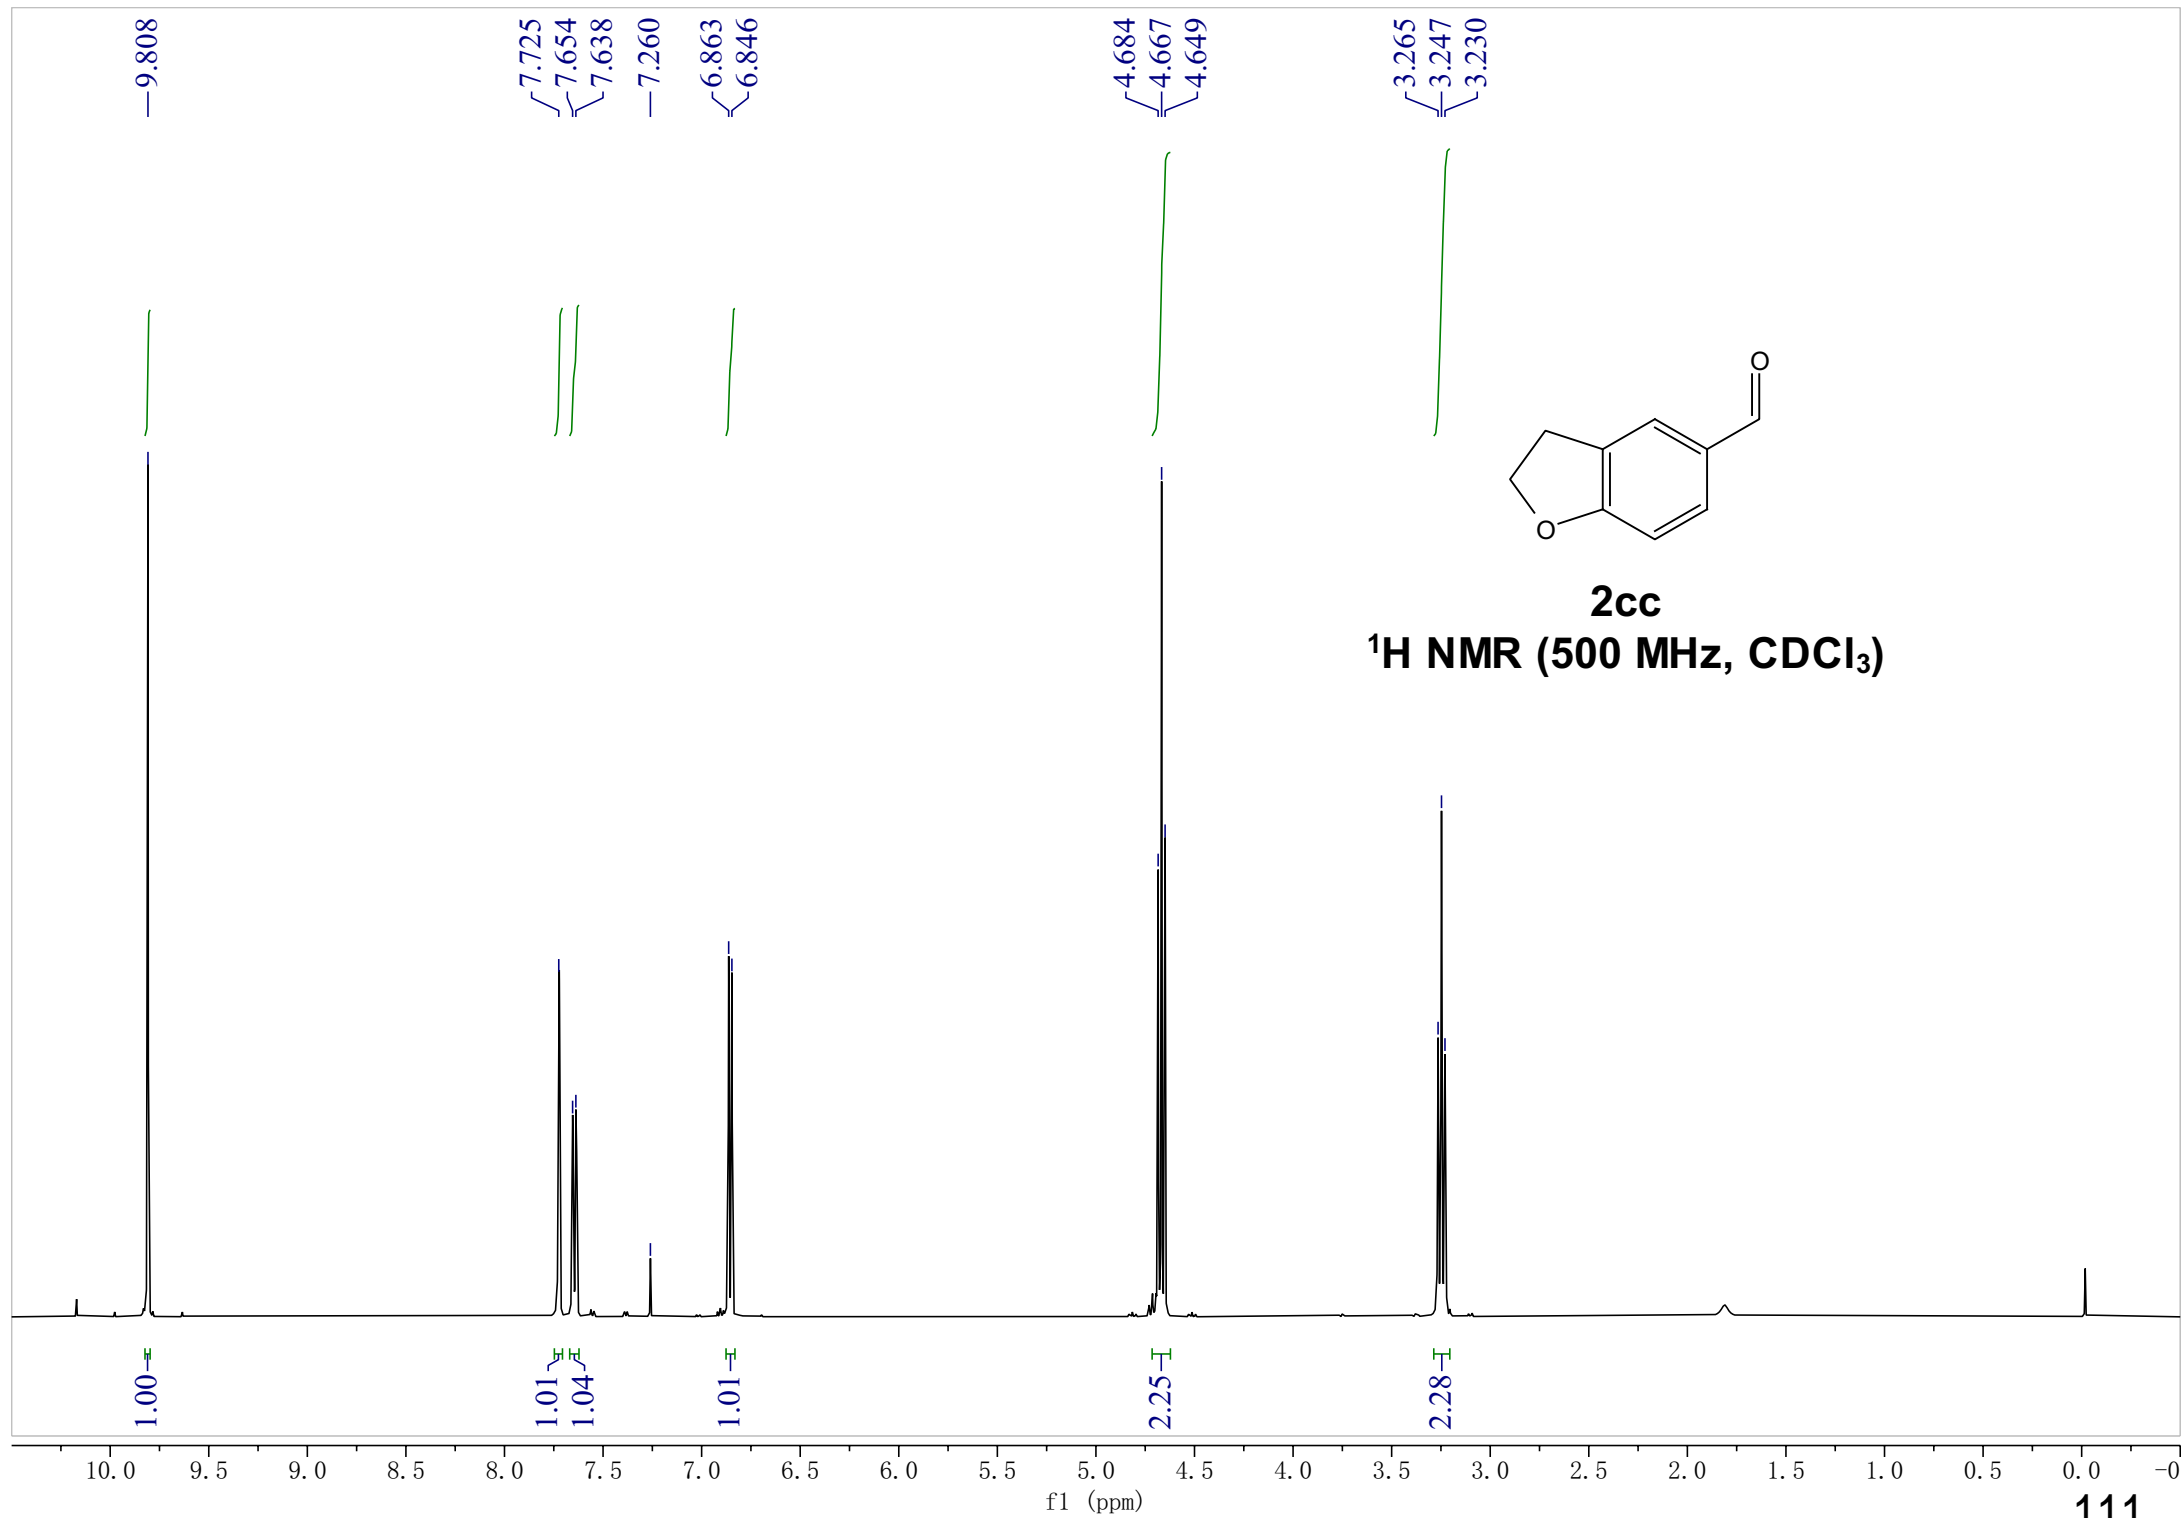



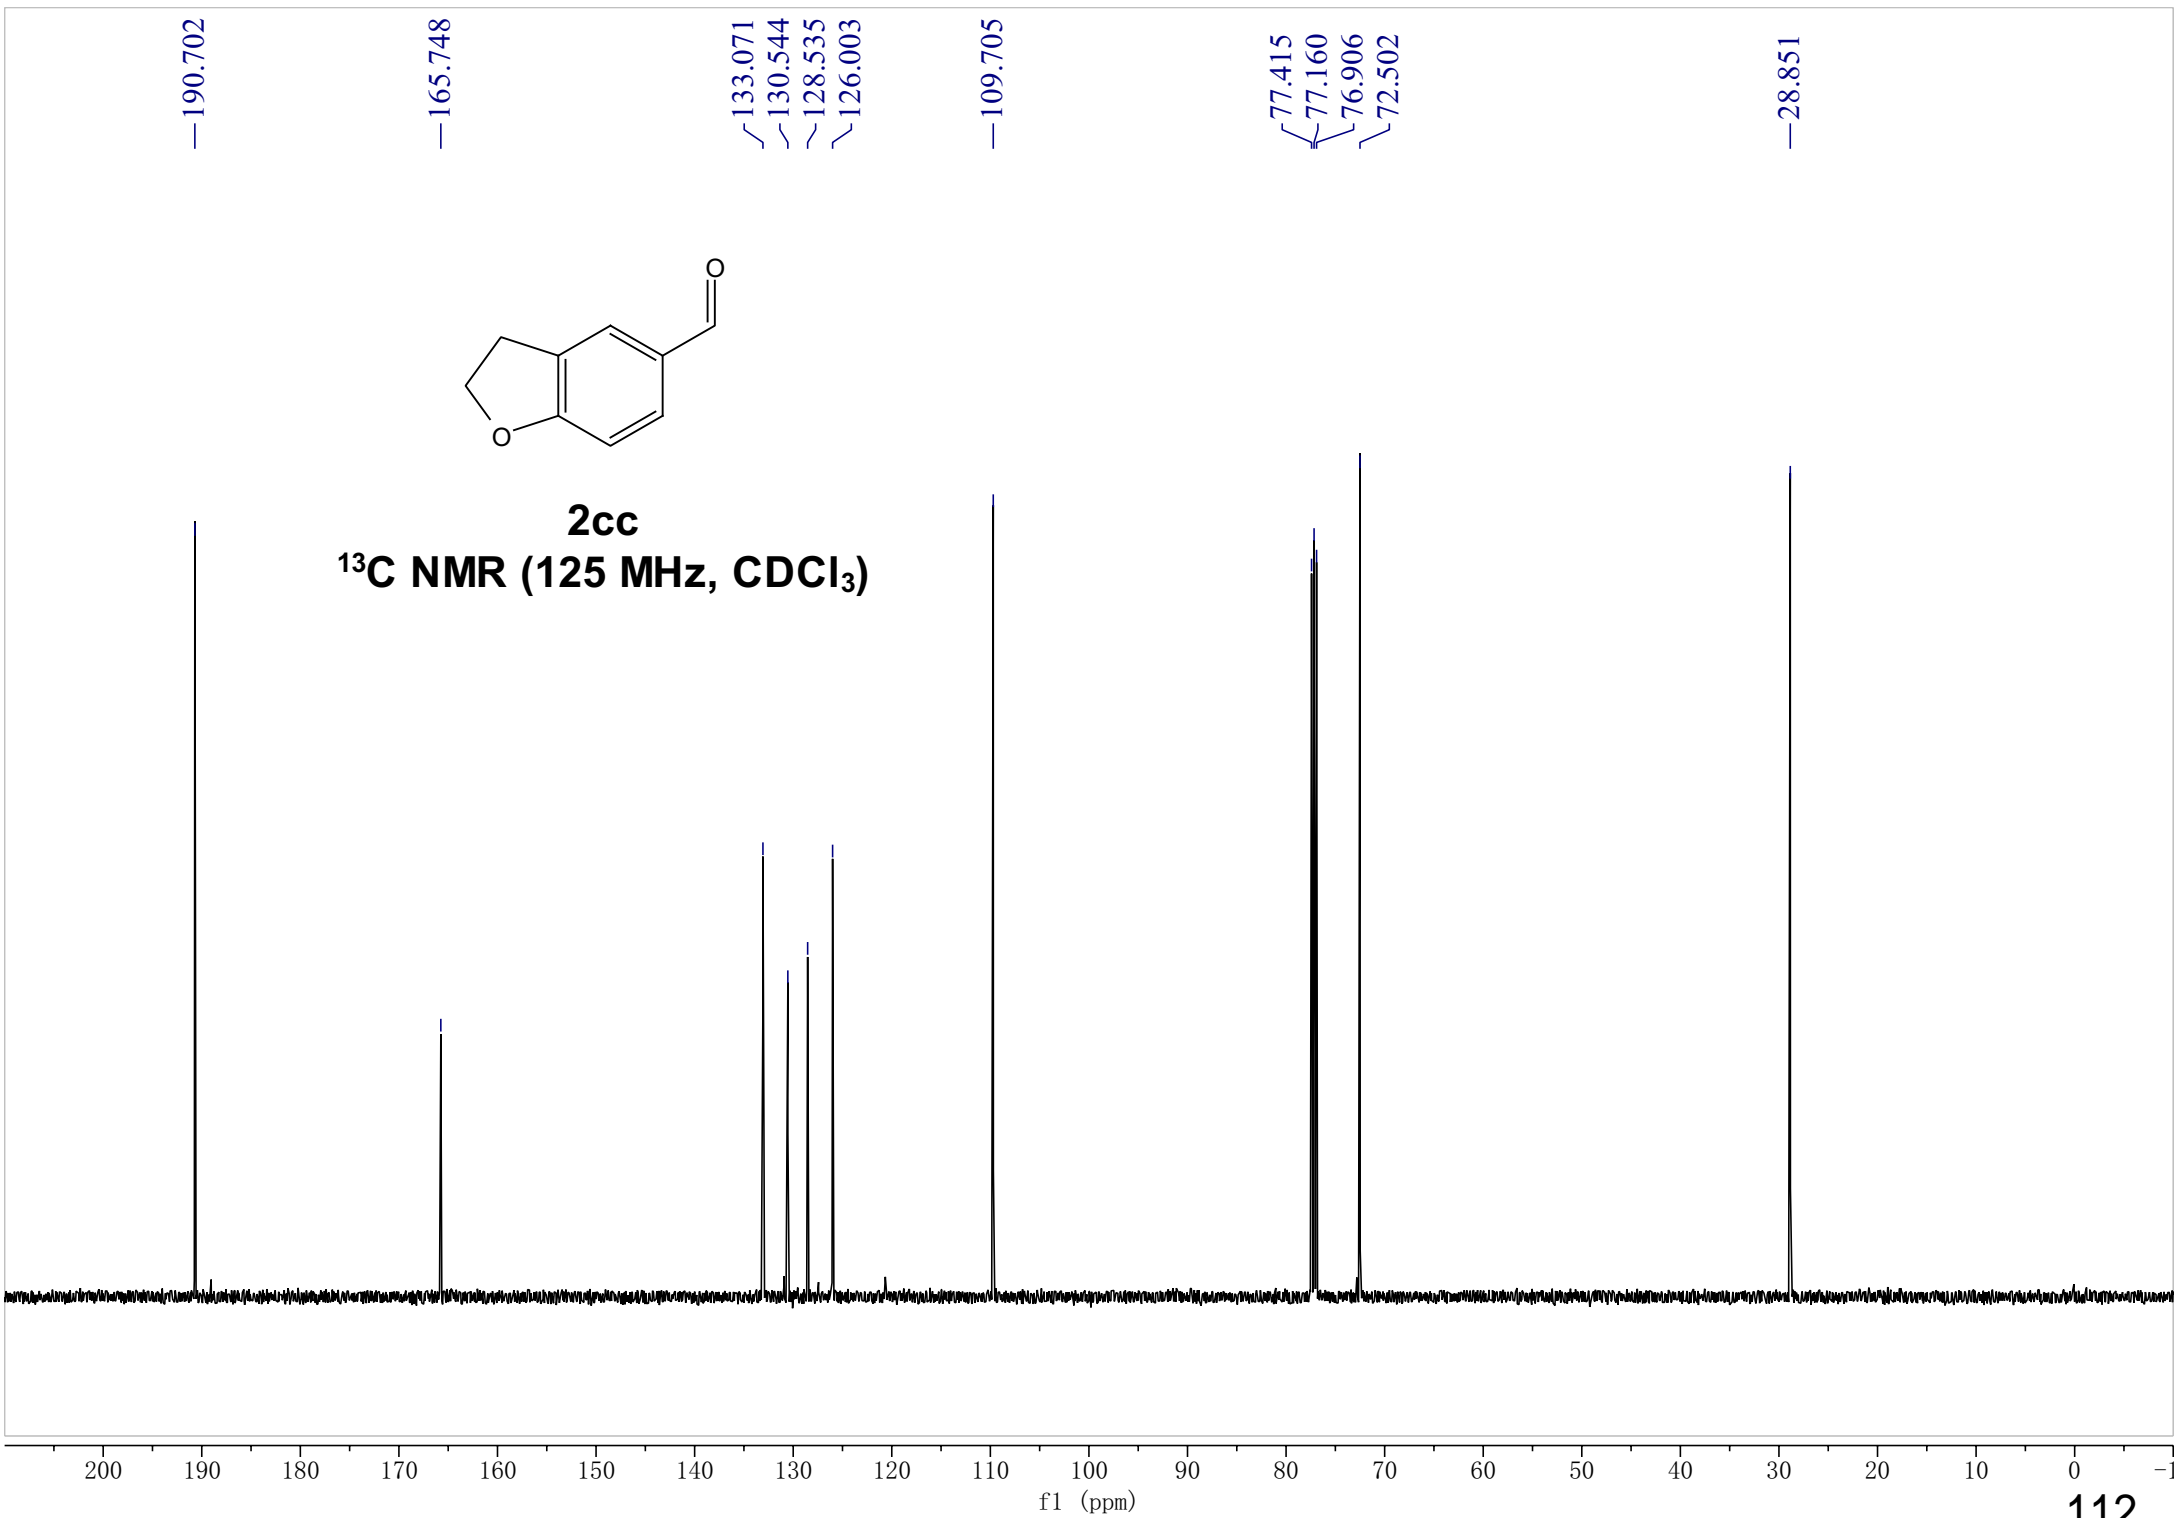

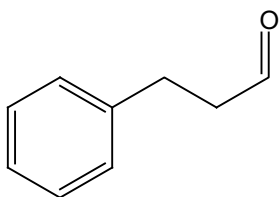

**2dd**  
**<sup>1</sup>H NMR (500 MHz, CDCl<sub>3</sub>)**

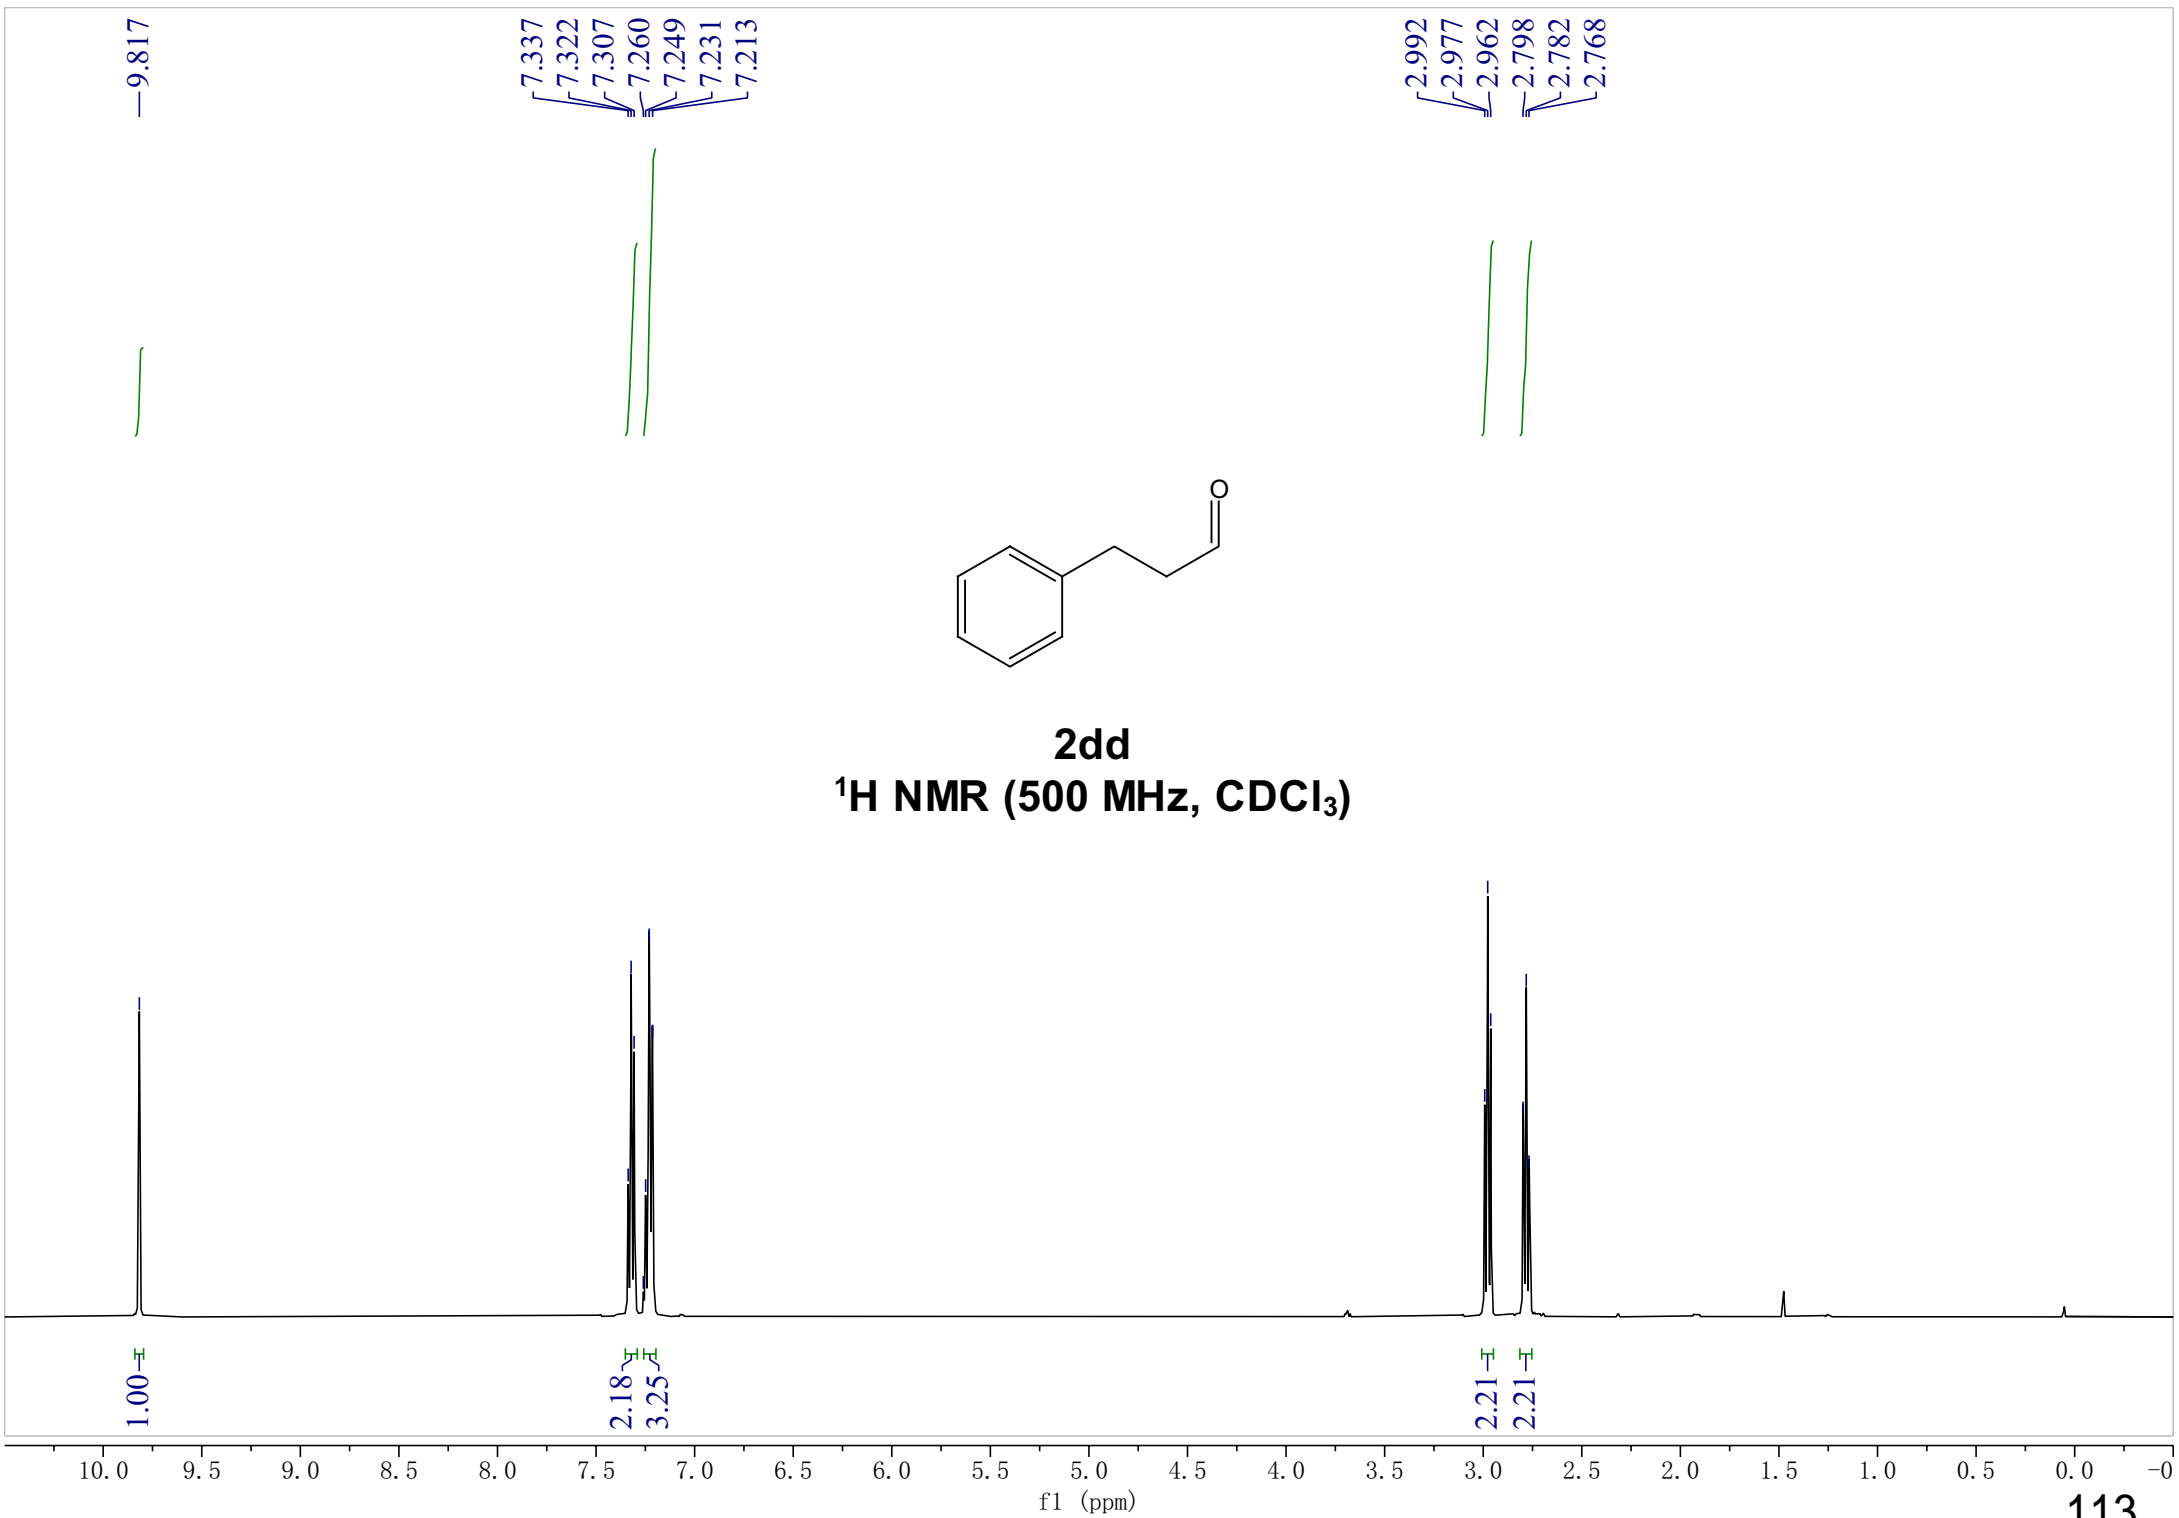

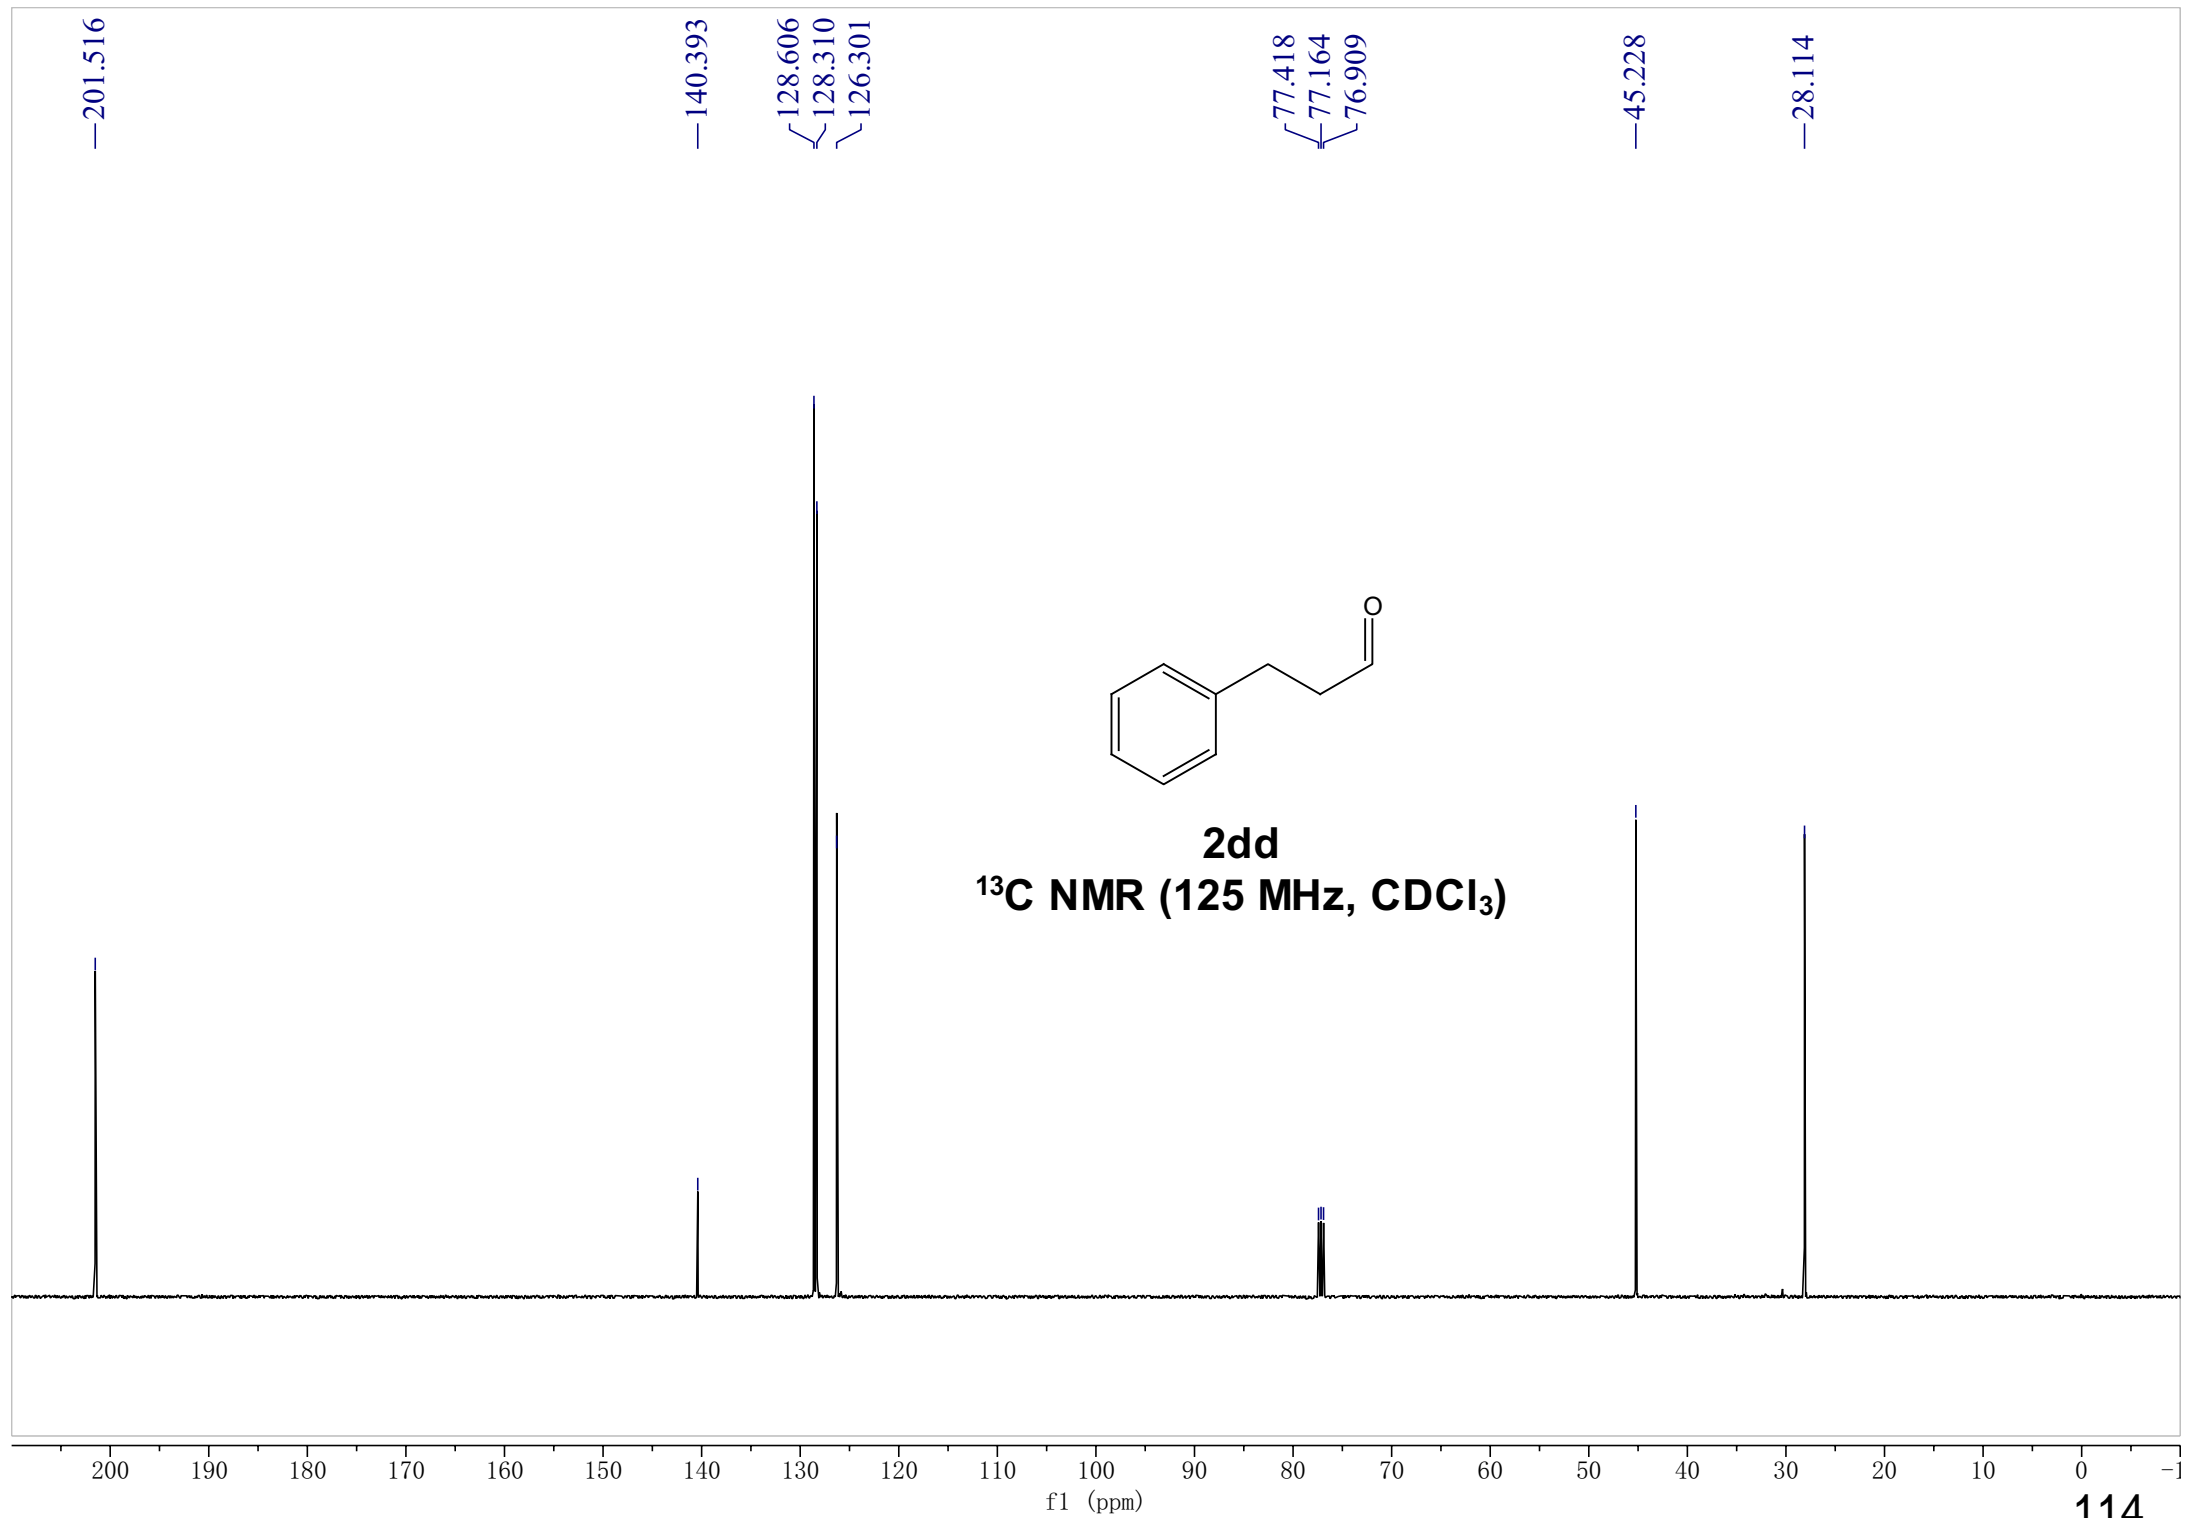

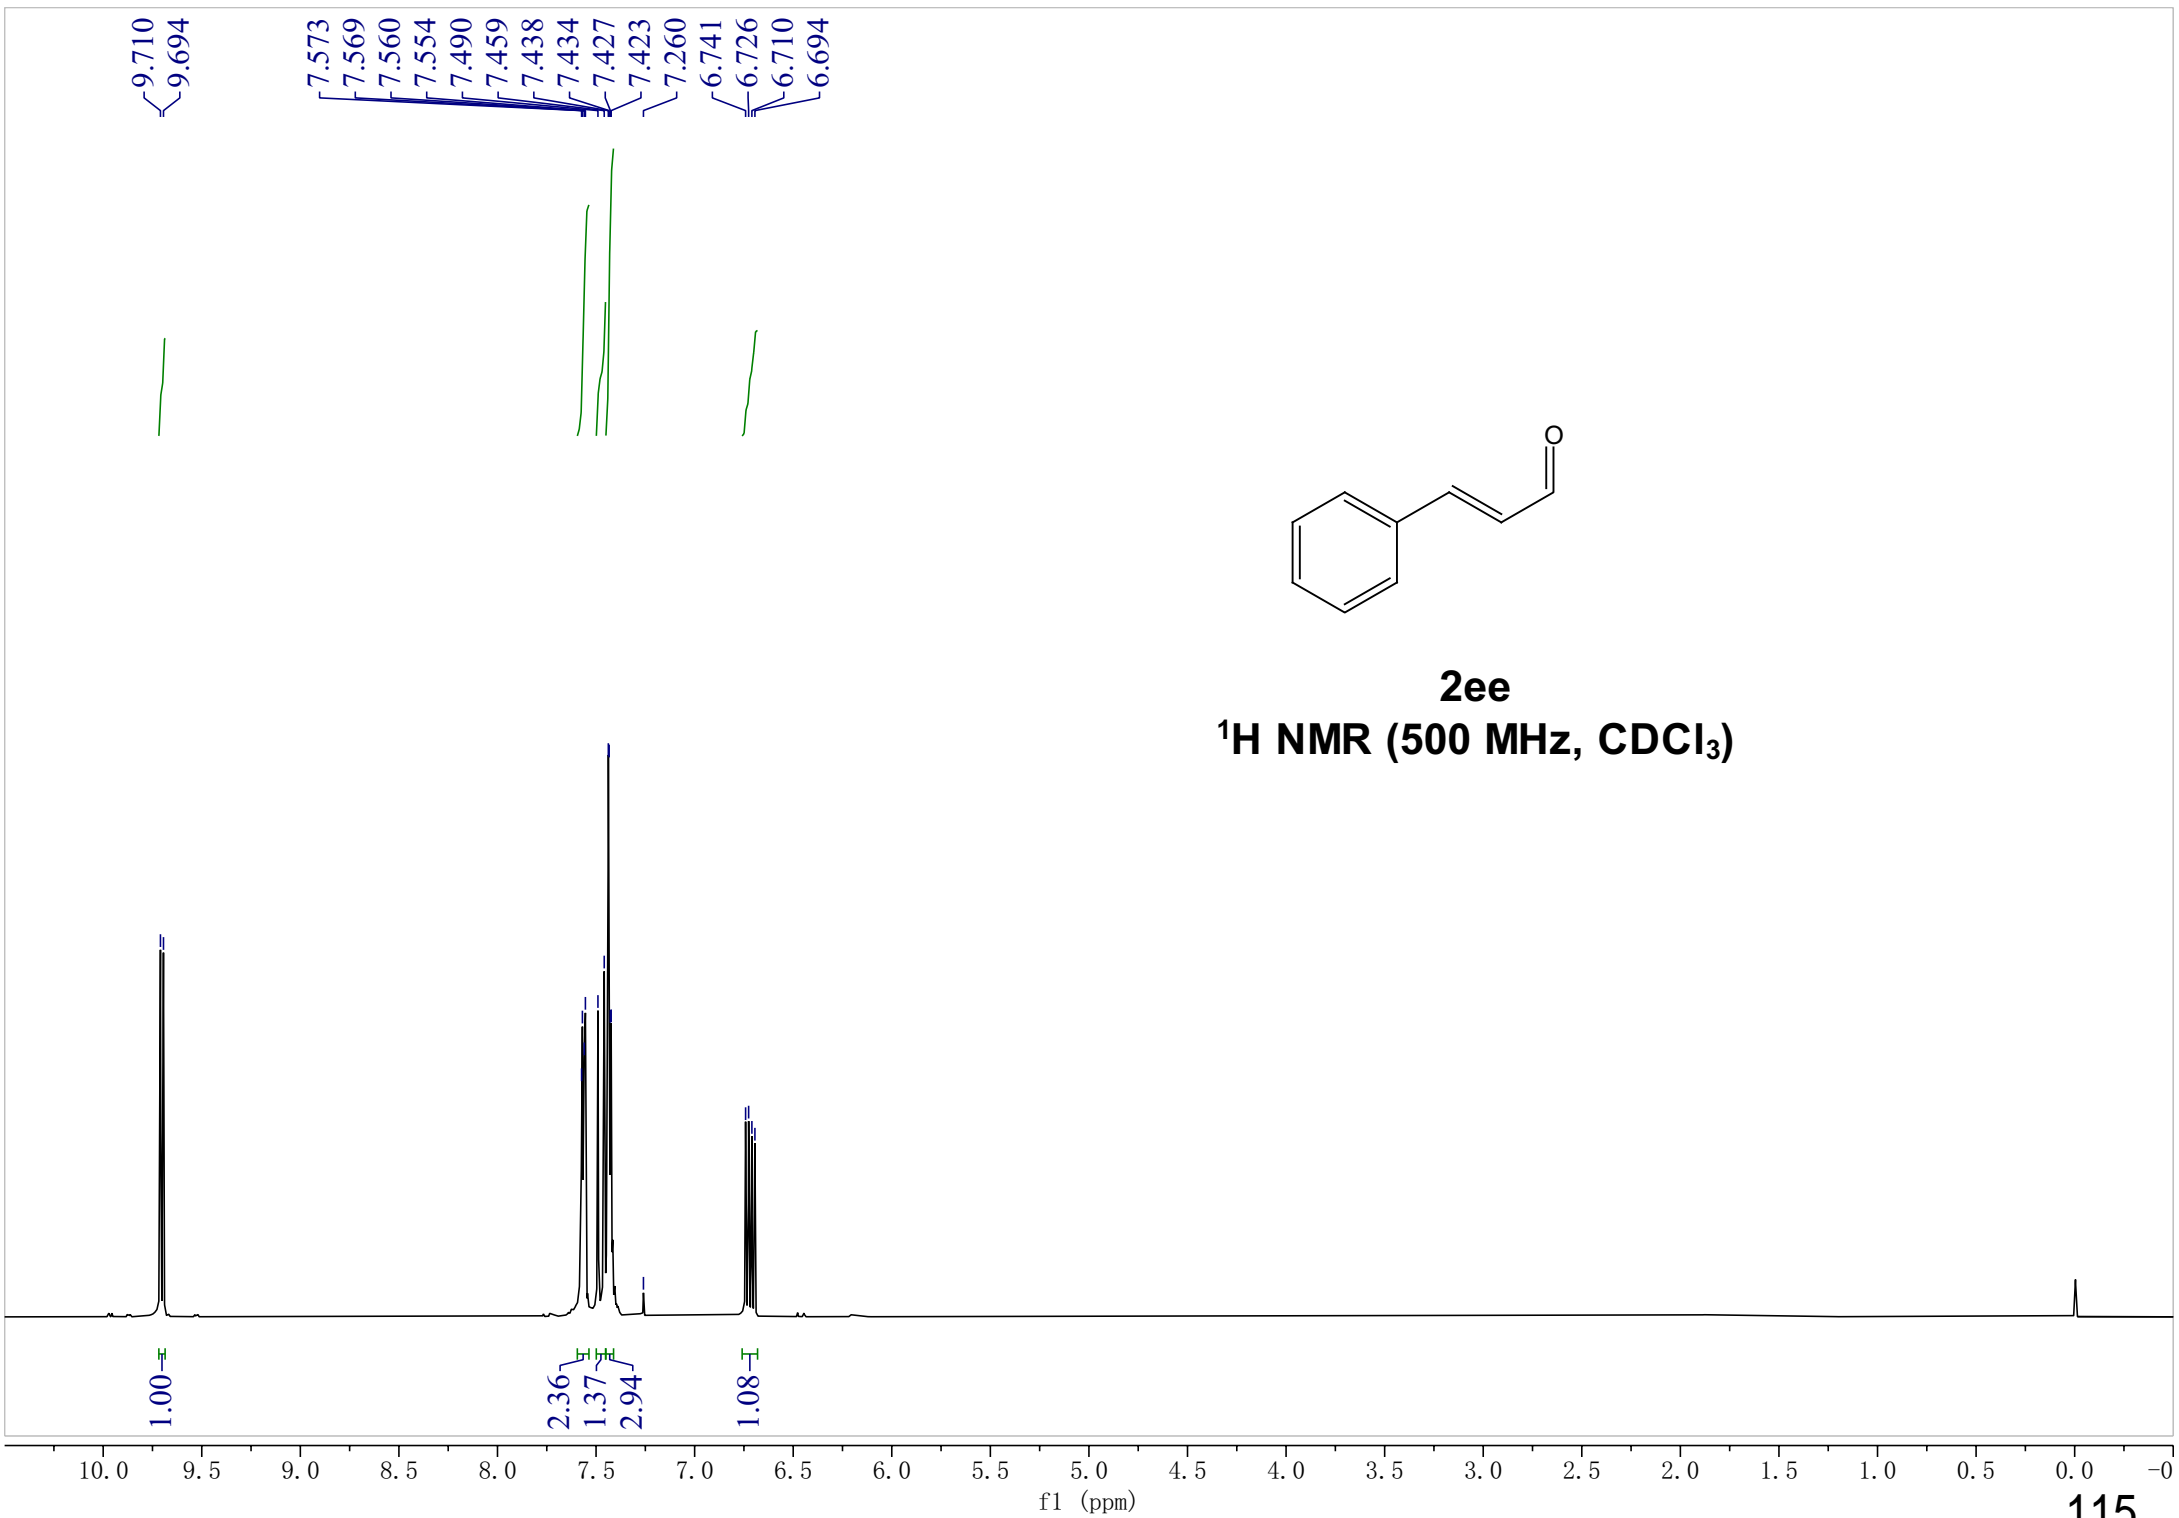

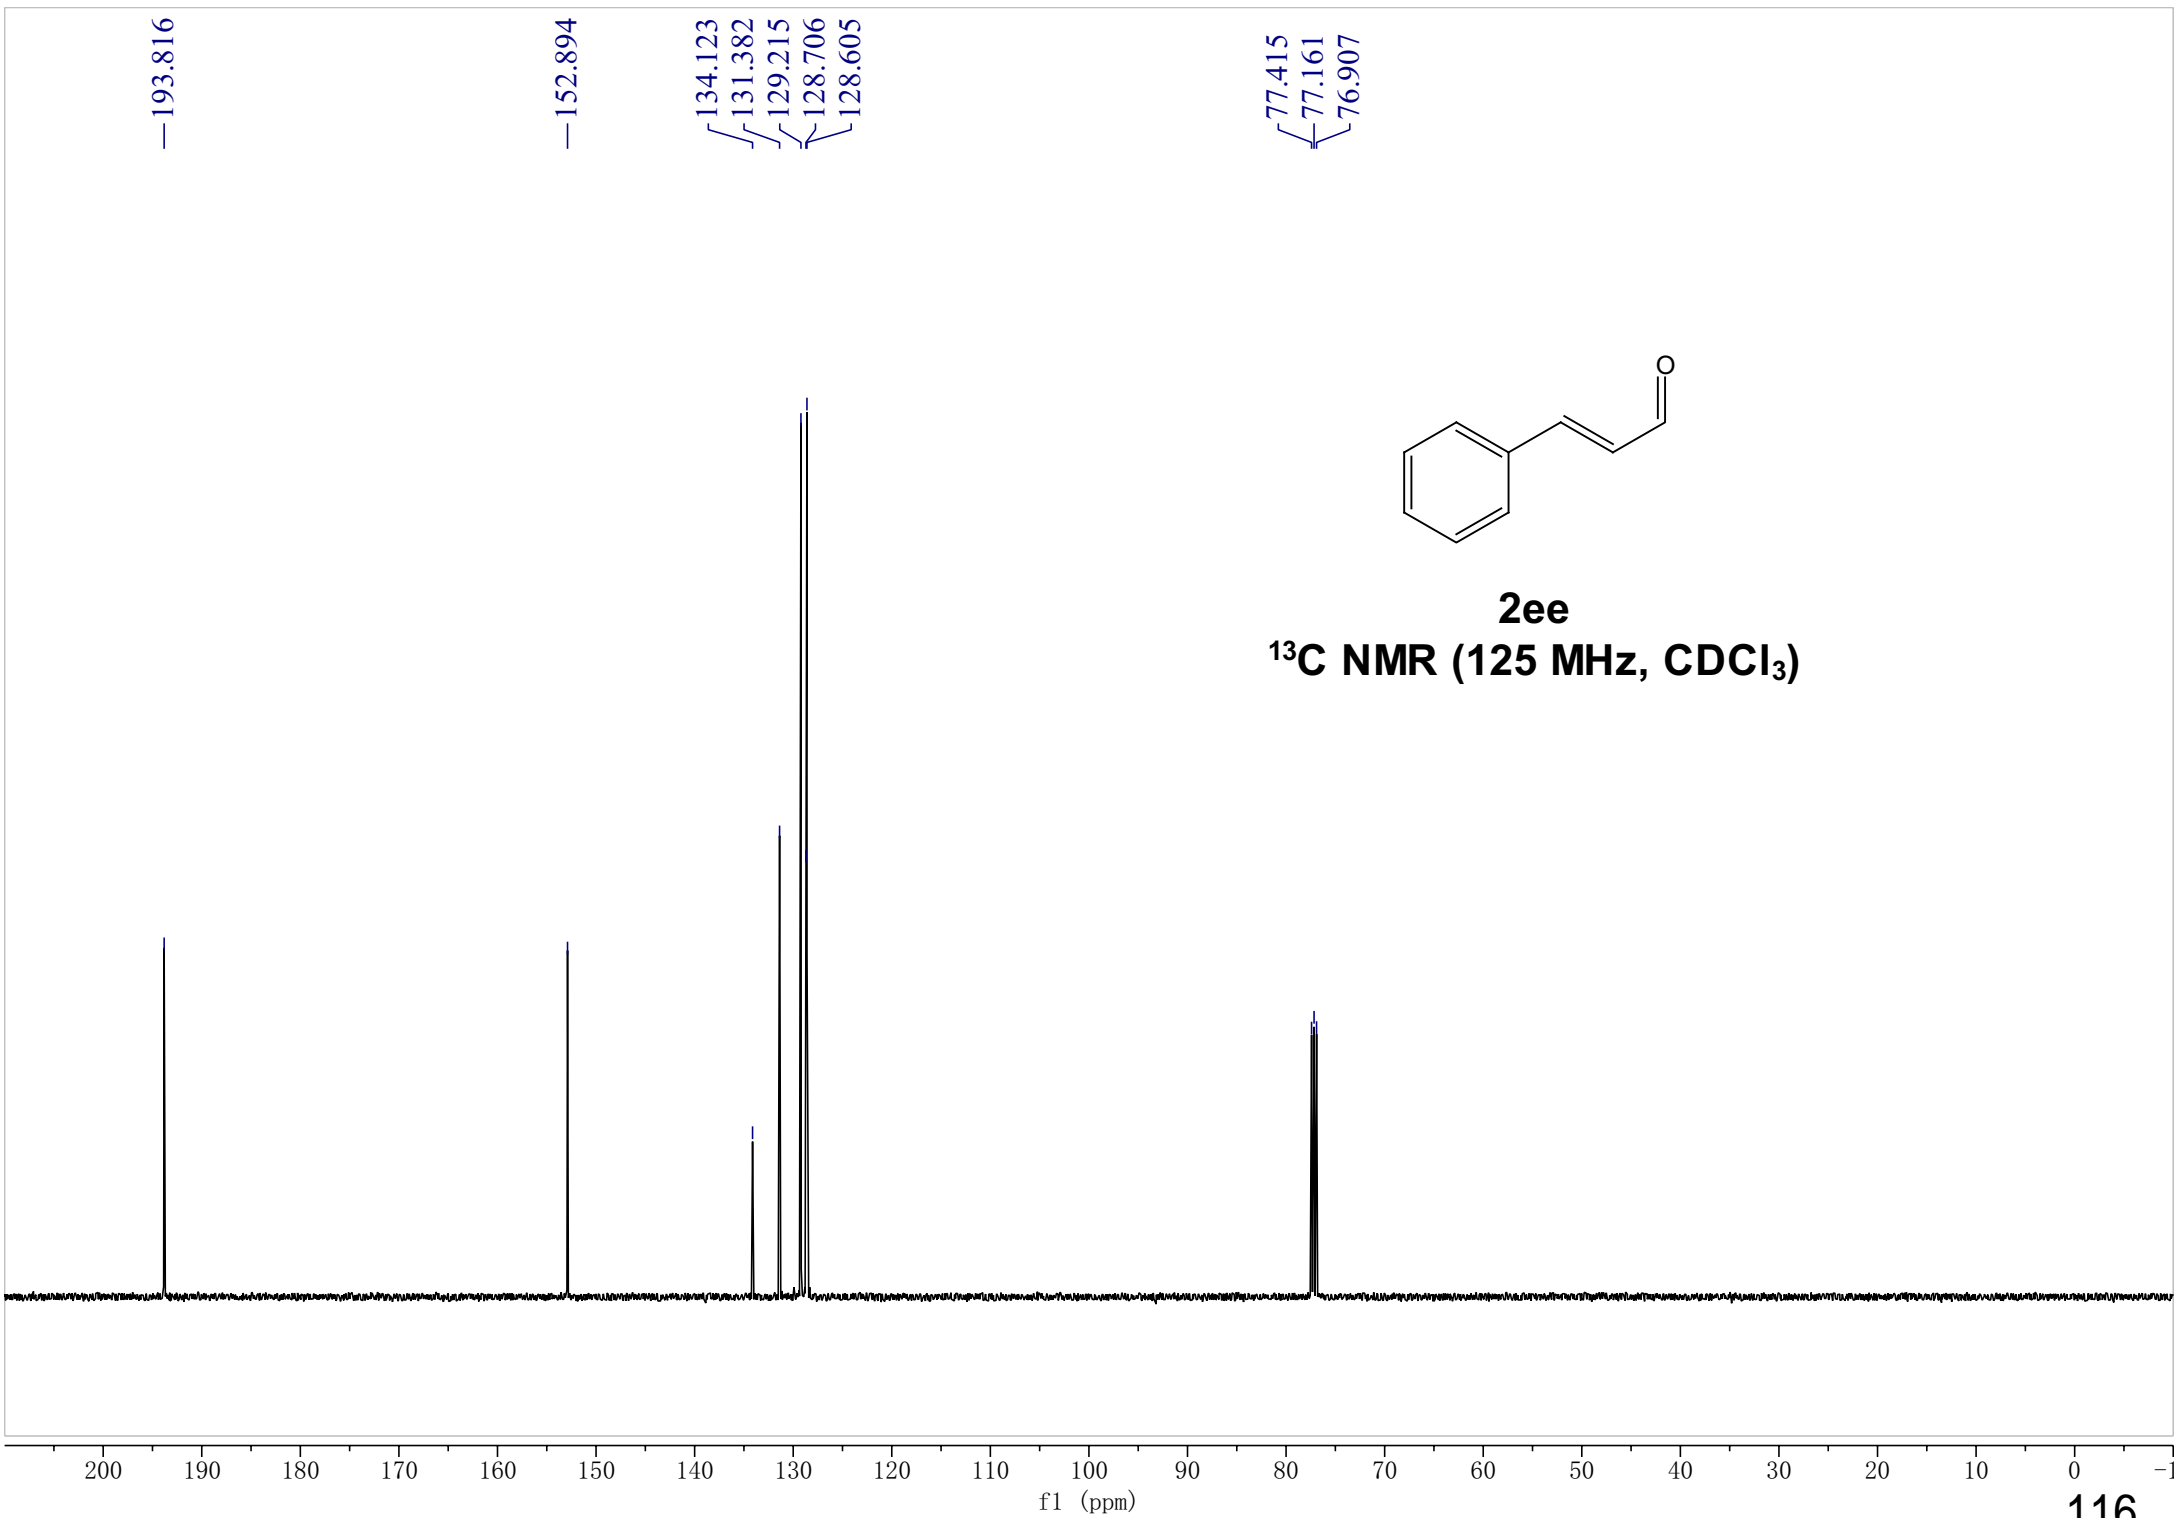

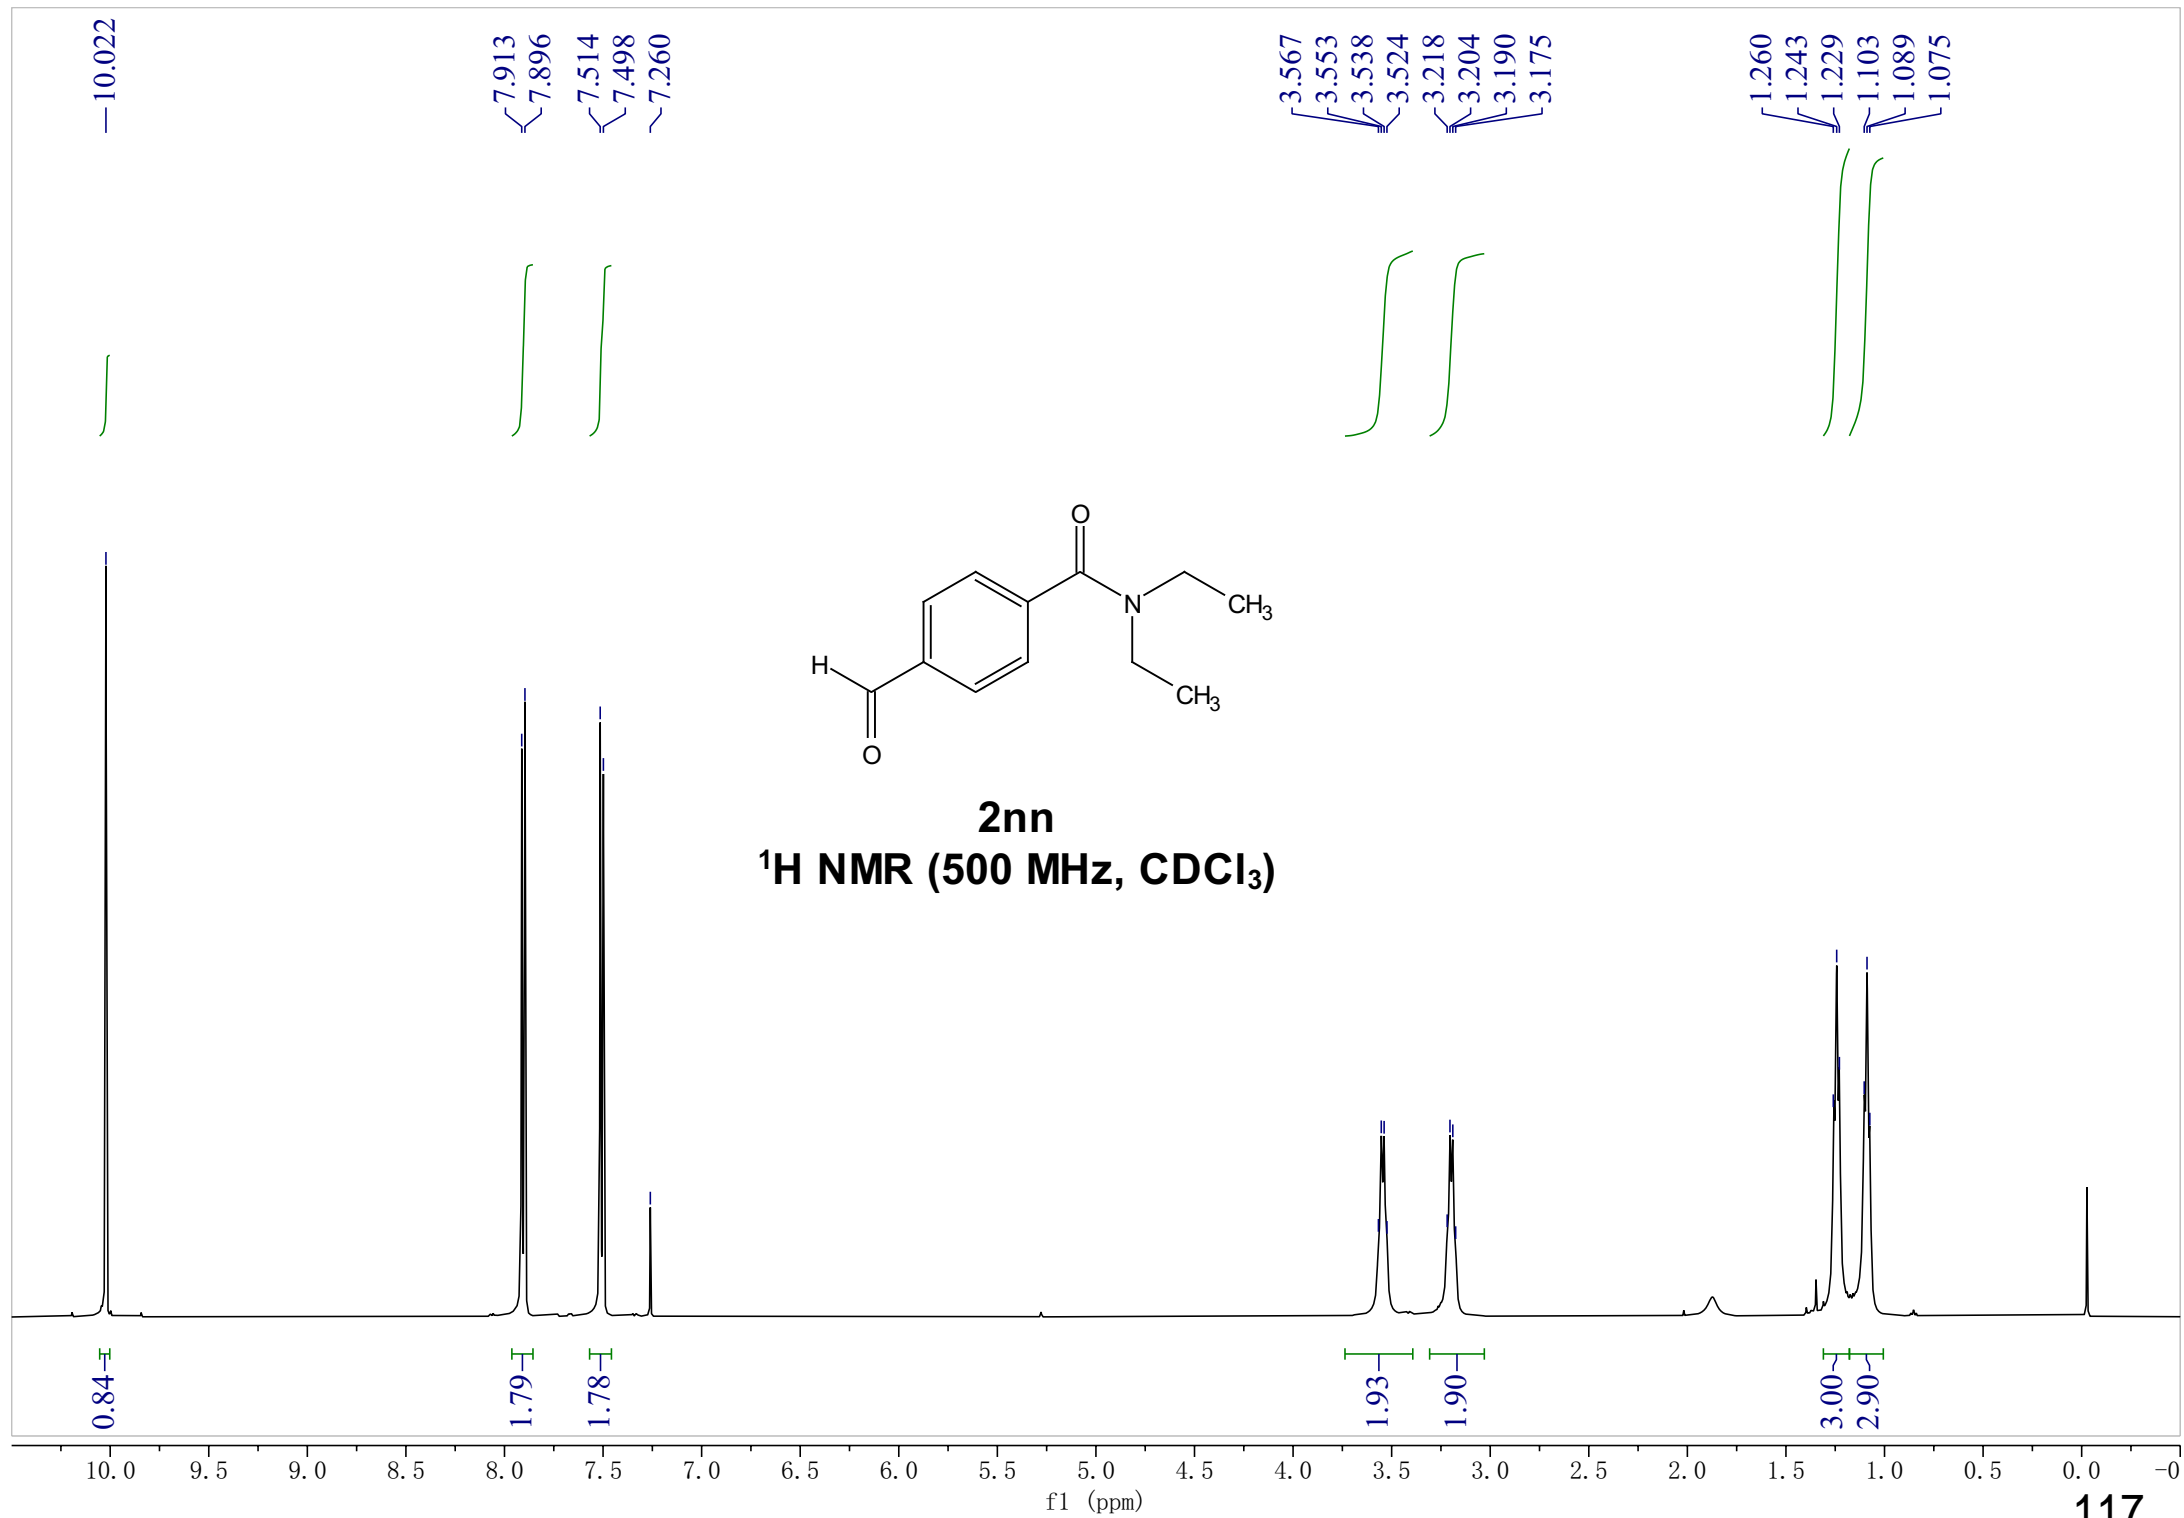

—191.670

—169.974

—143.074

—136.621

—129.998

—127.008

—77.416

—77.160

—76.907

—43.324

—39.451

—14.289

—12.967

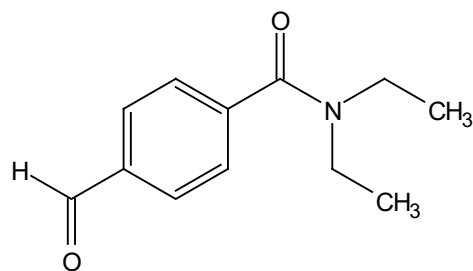

**2nn**

**<sup>1</sup>H NMR (500 MHz, CDCl<sub>3</sub>)**

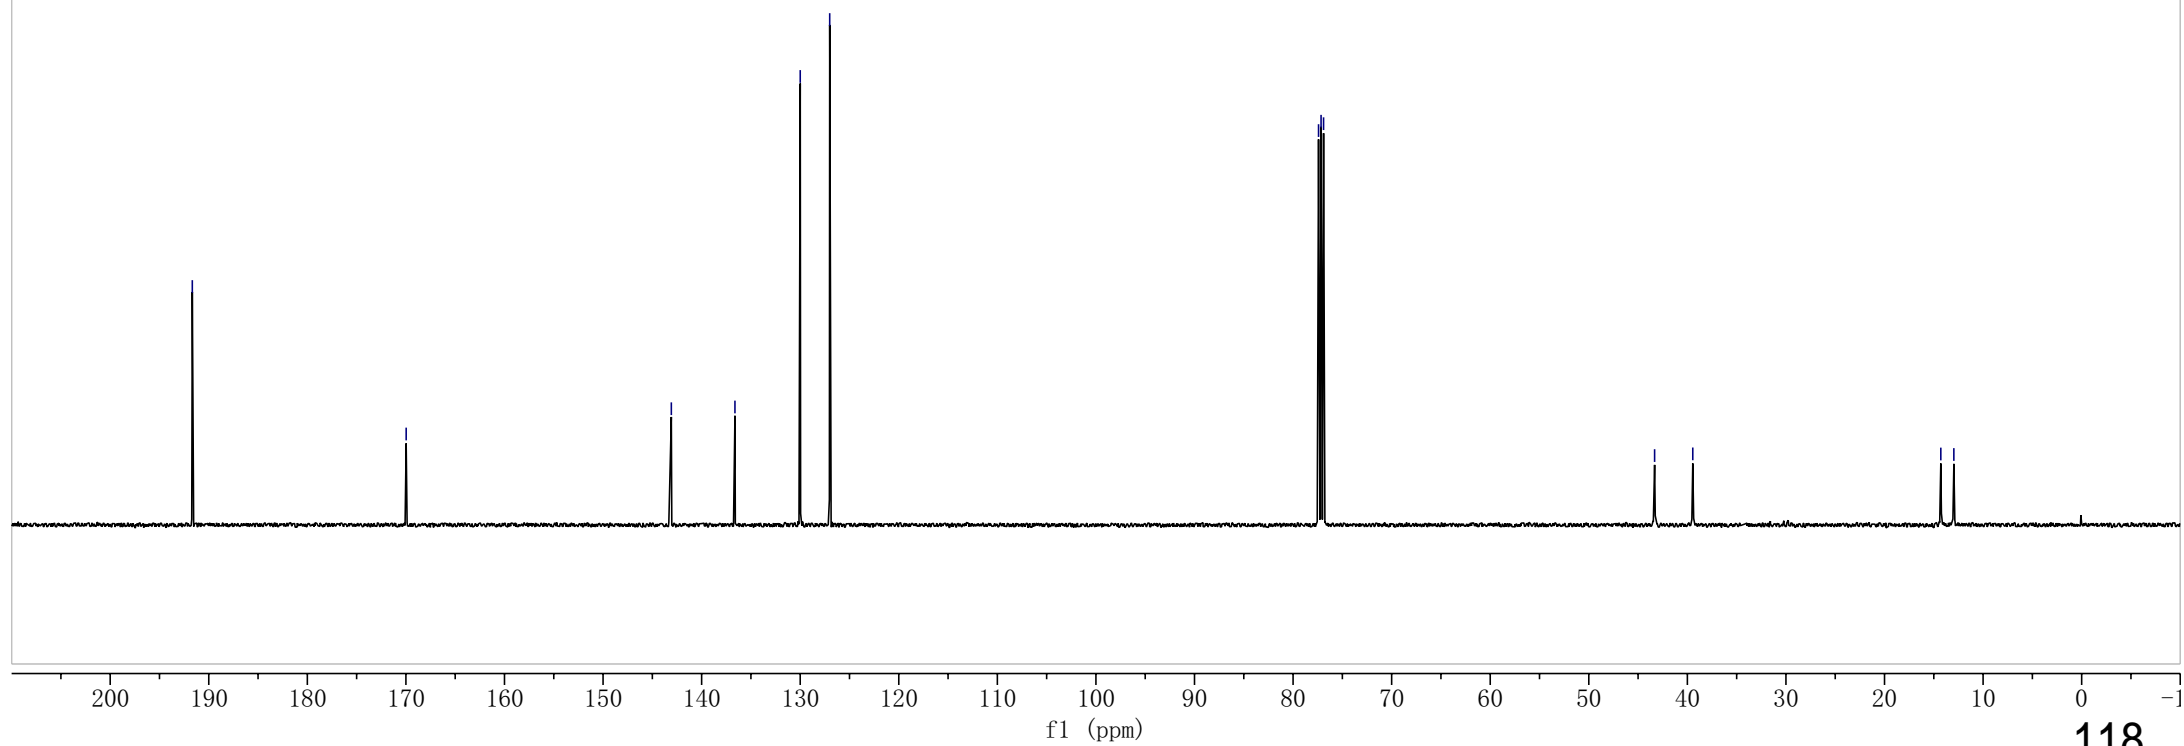

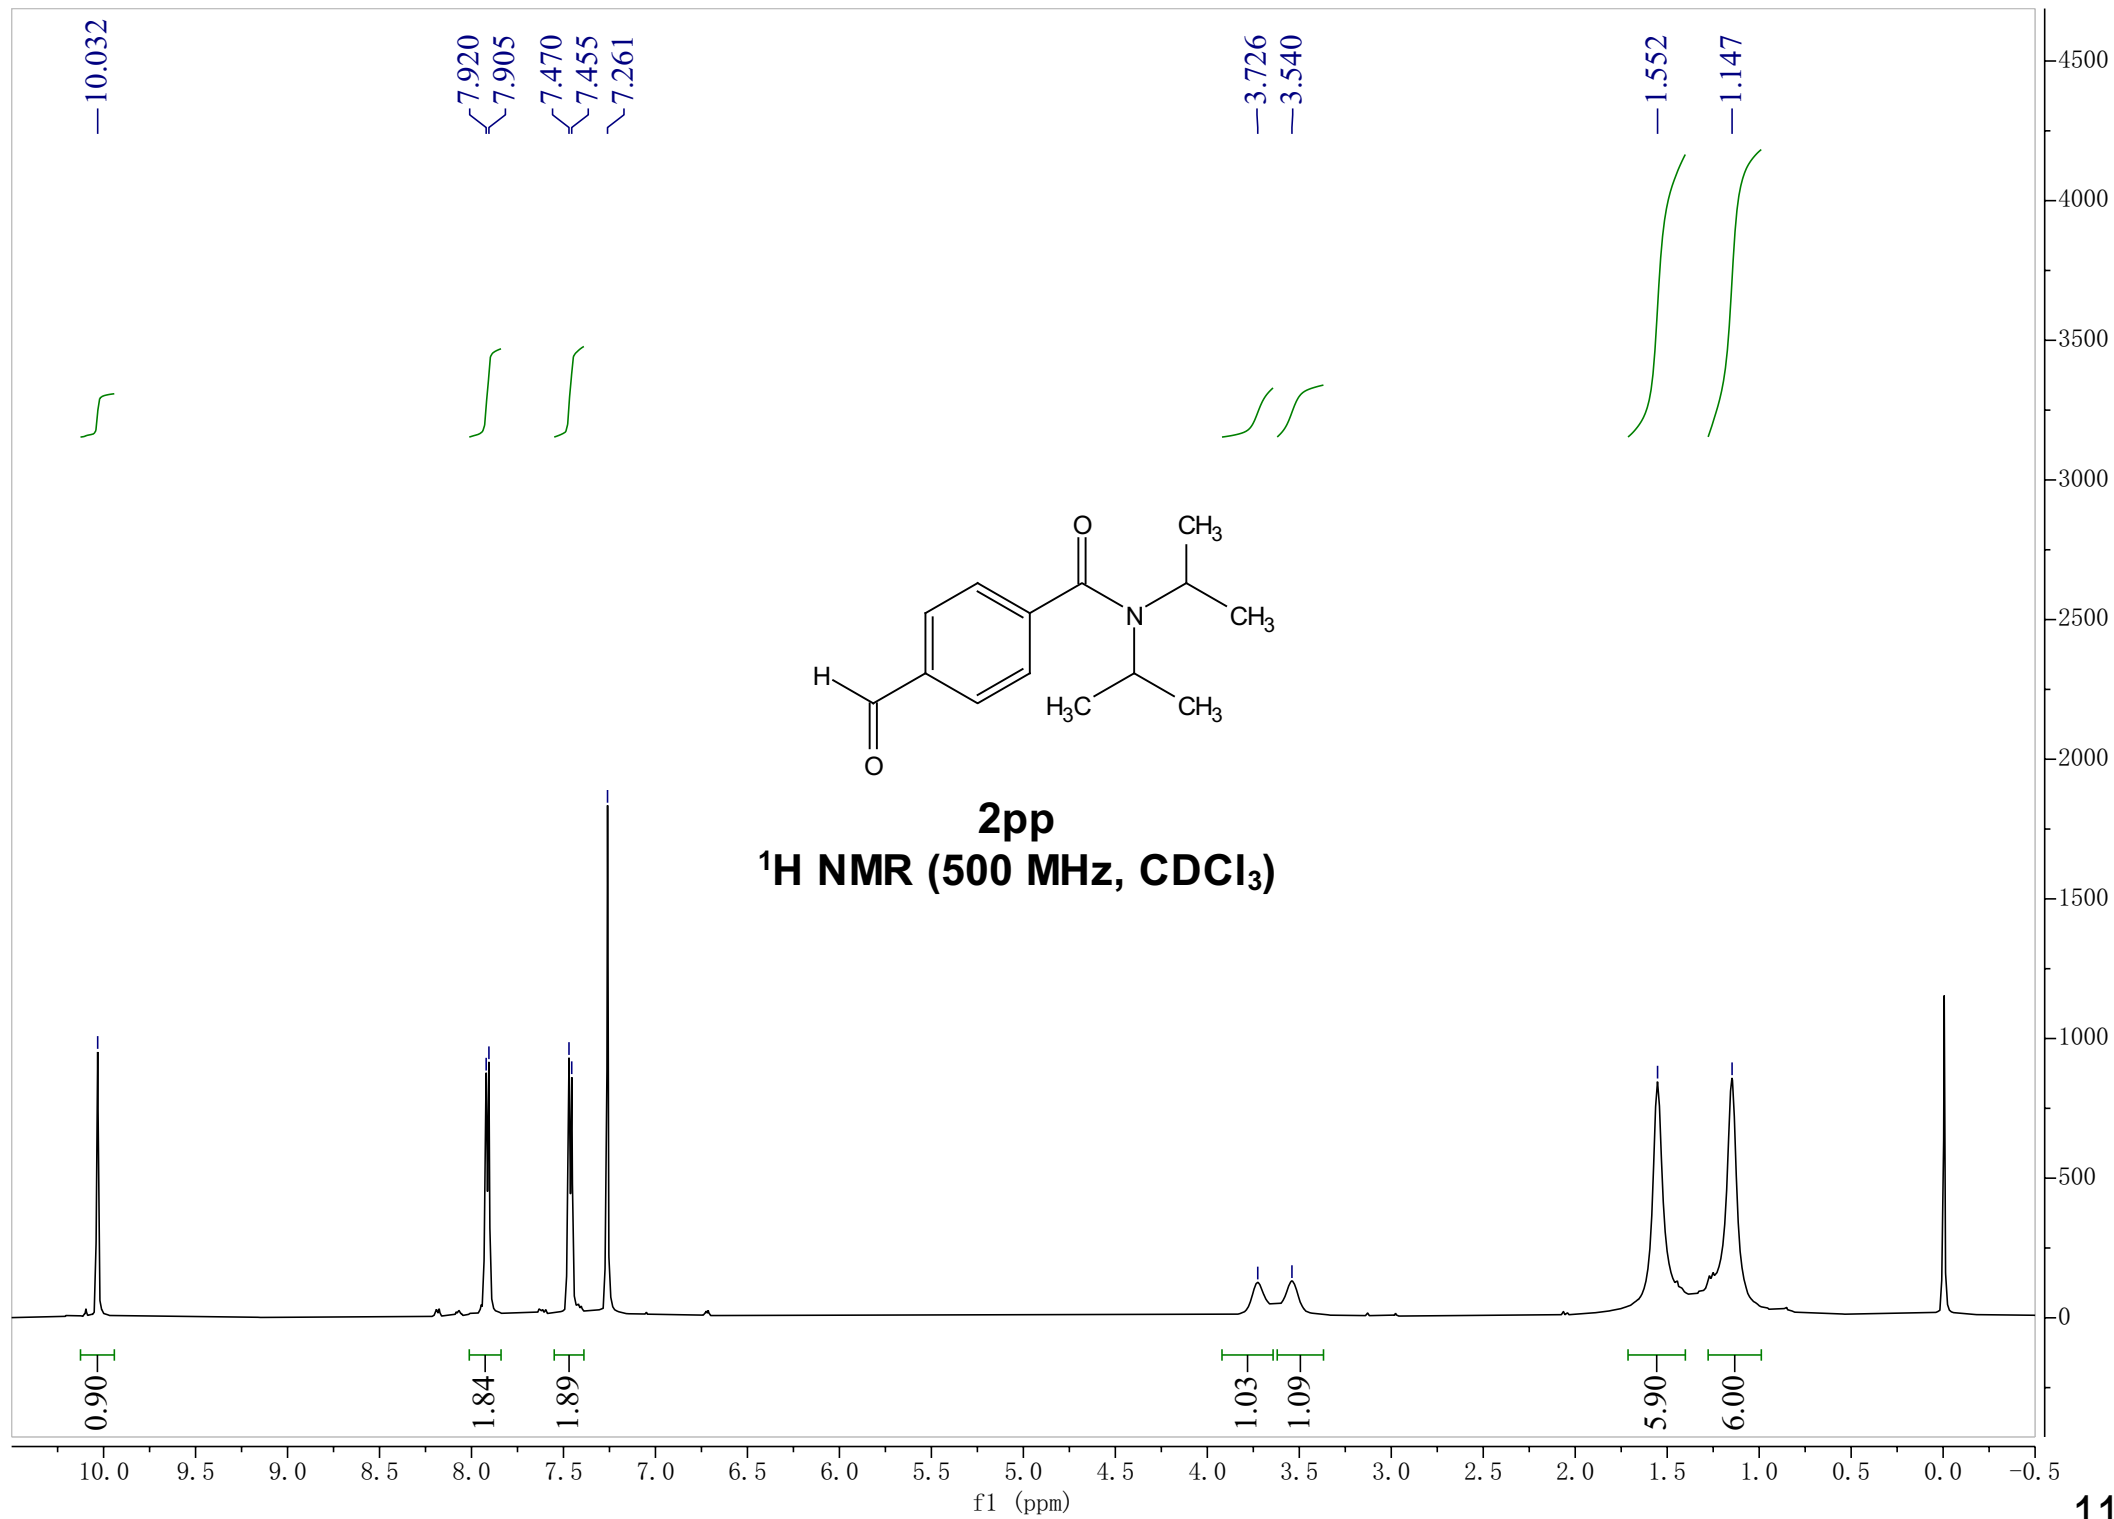



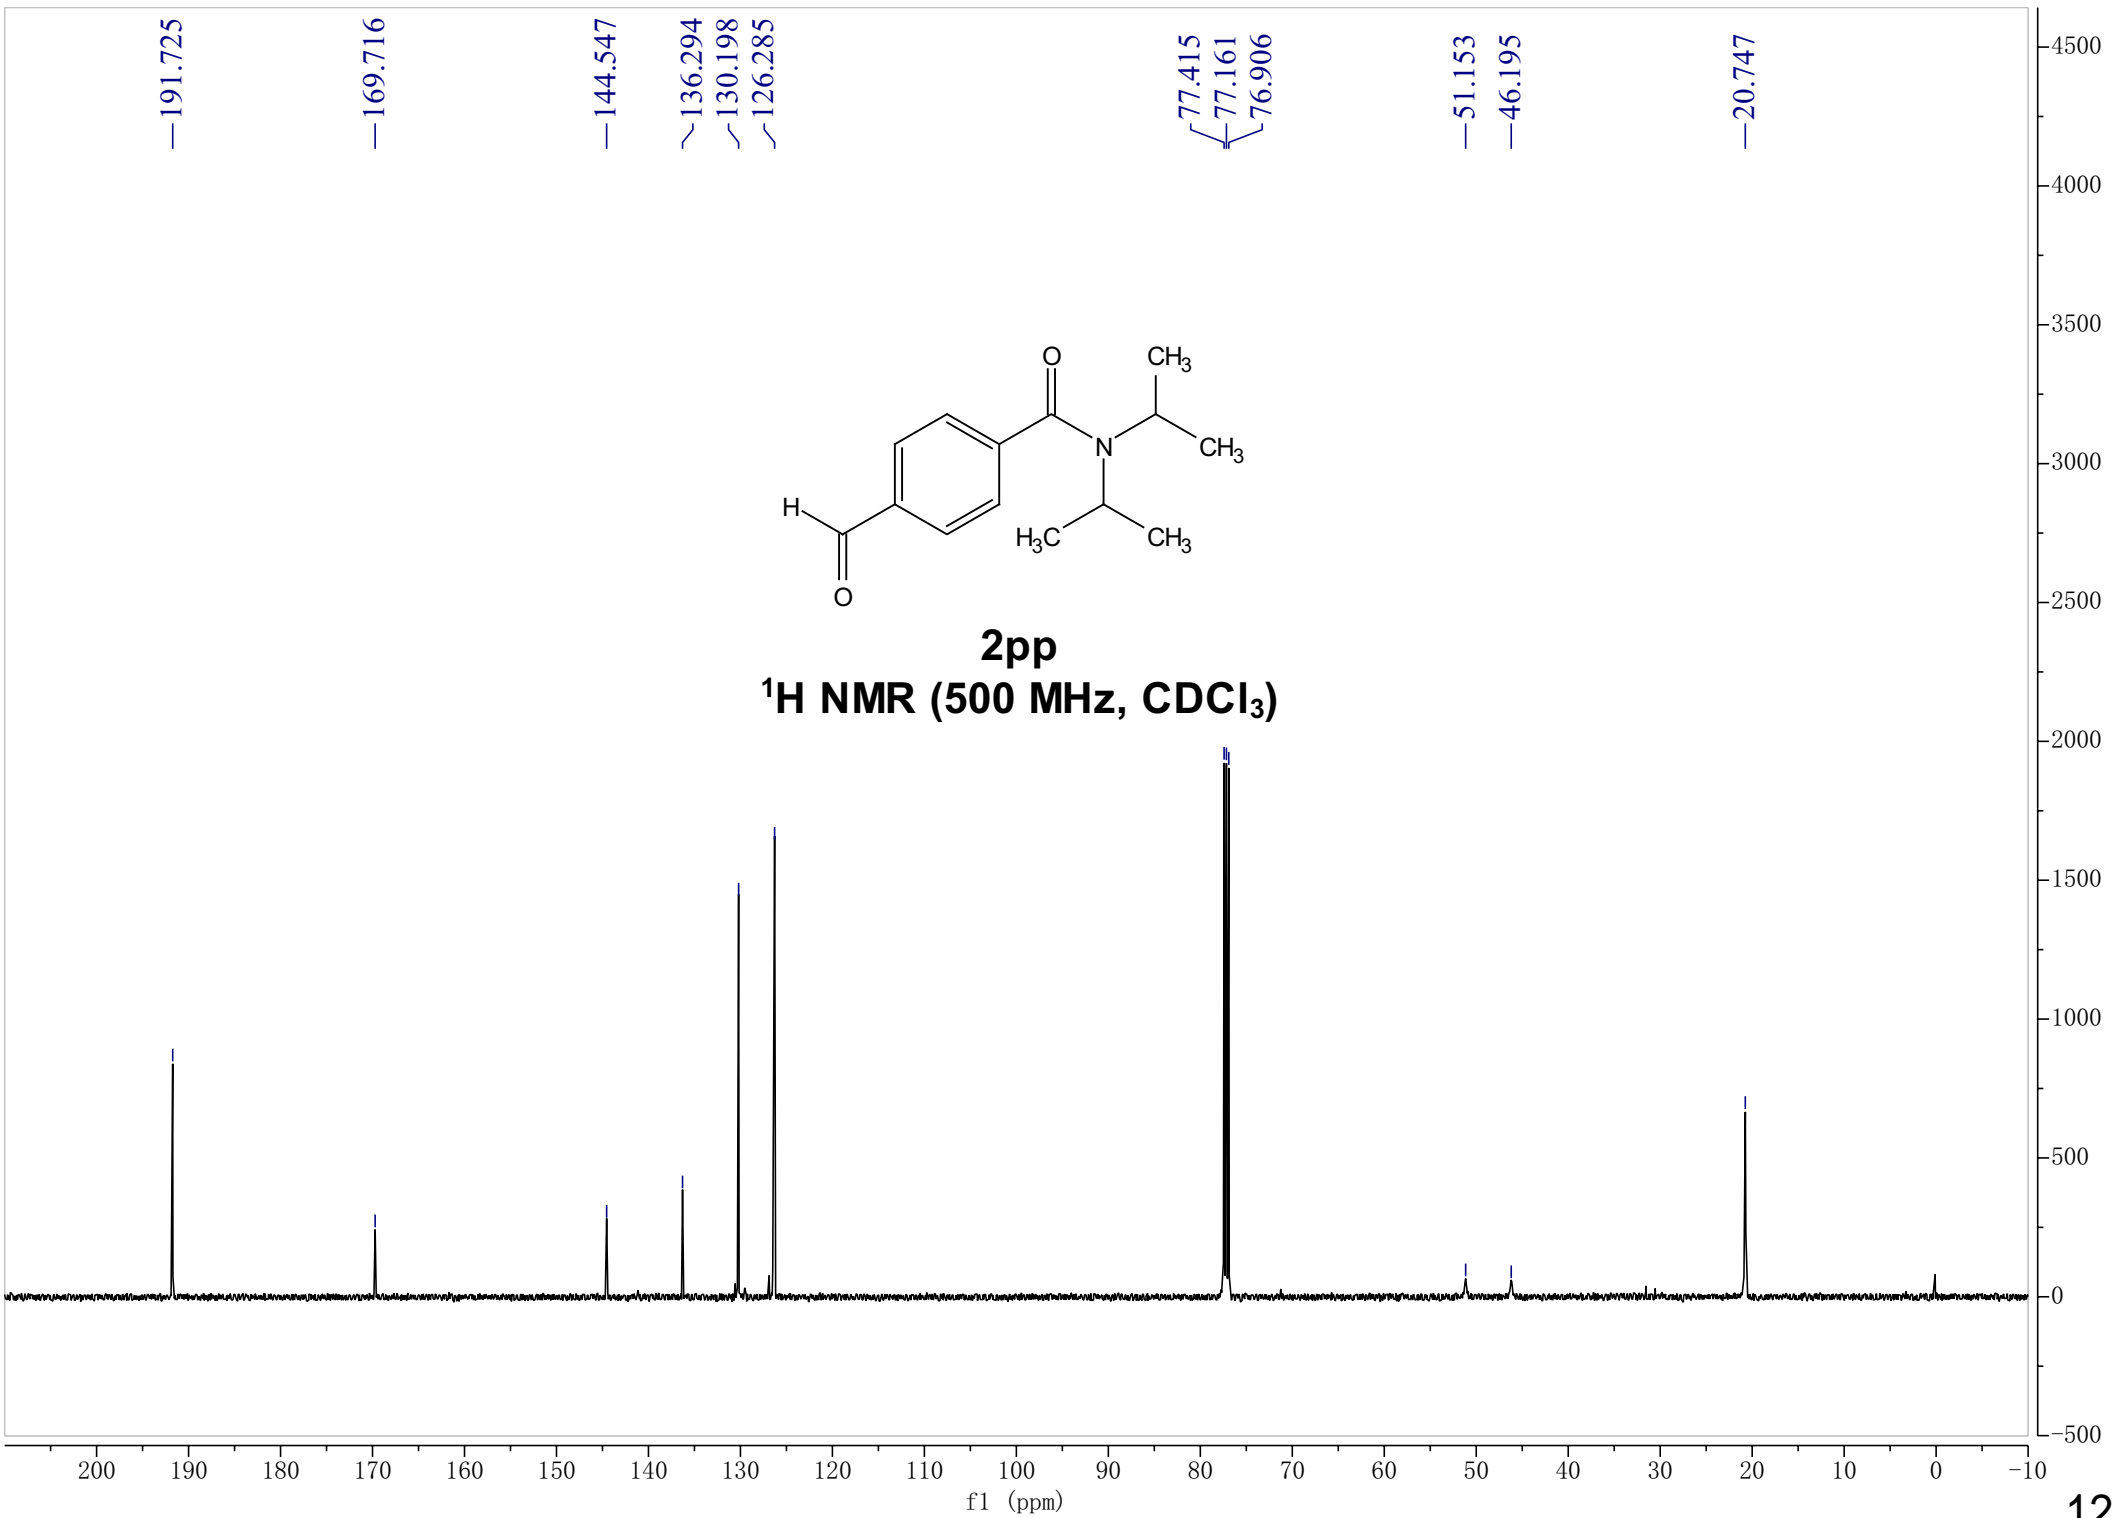

7.450  
7.441  
7.437  
7.433  
7.426  
7.309  
7.304  
7.295  
7.287  
7.283  
7.260 CDCl<sub>3</sub>

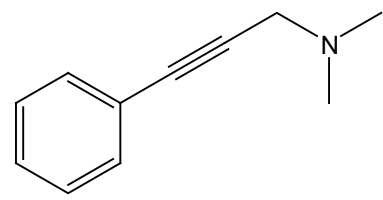

**4qq**  
**<sup>1</sup>H NMR (400 MHz, CDCl<sub>3</sub>)**

3.467

2.368

1.96  
2.93

2.00

6.10

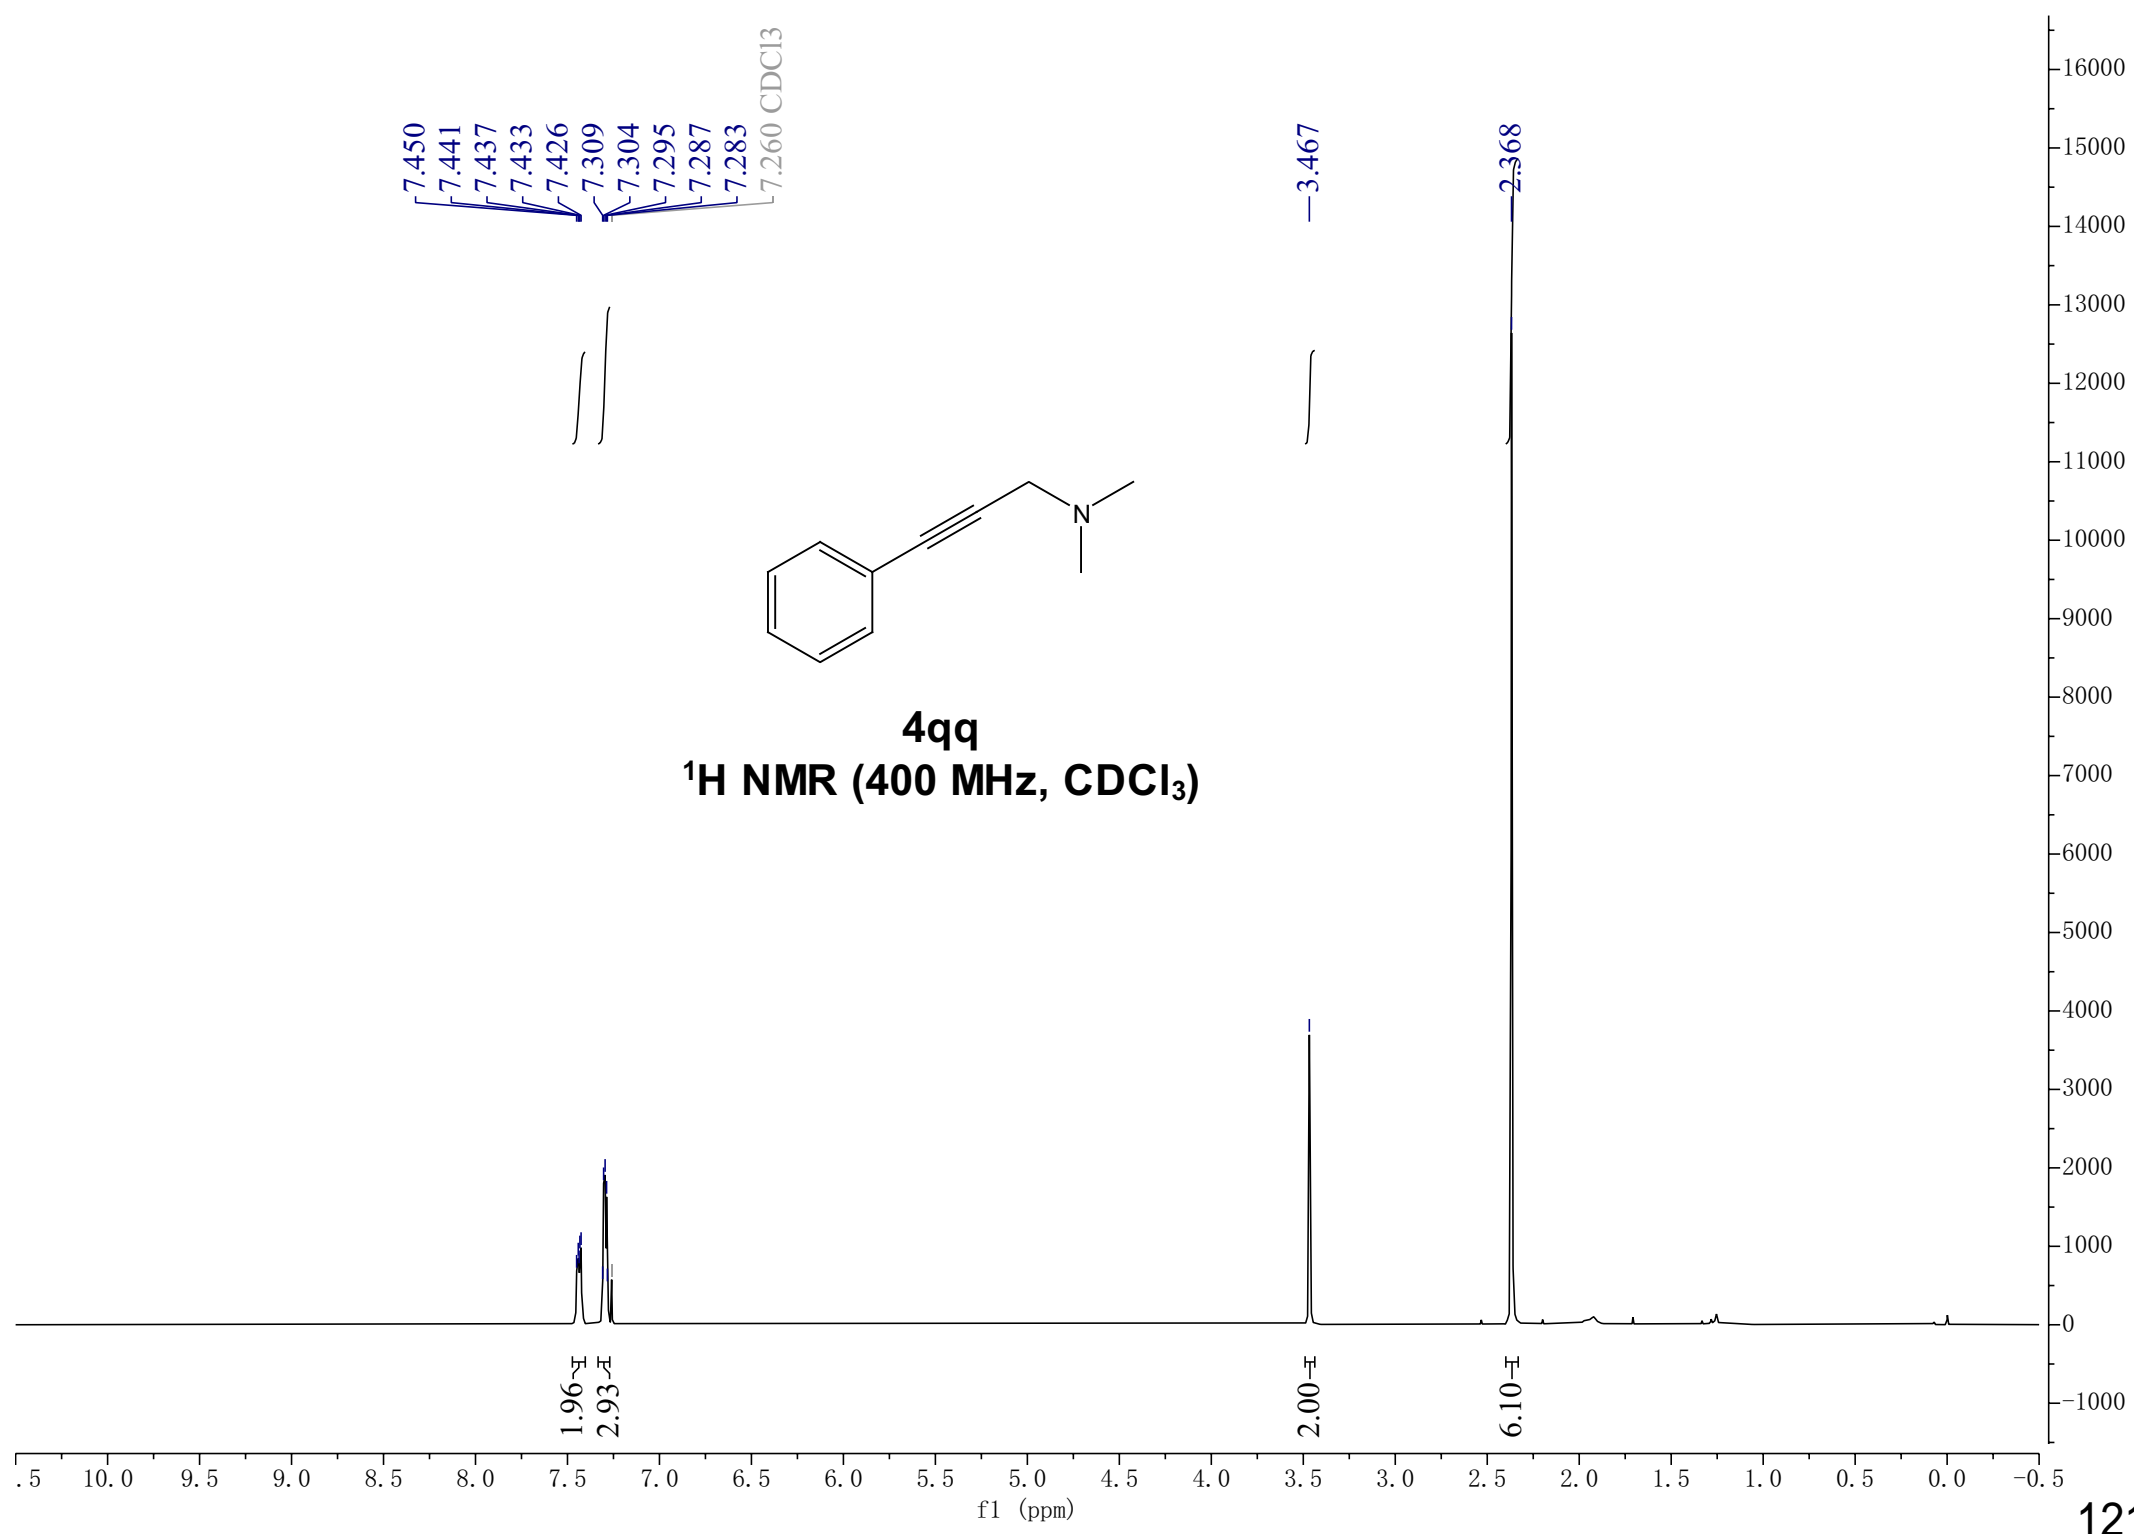

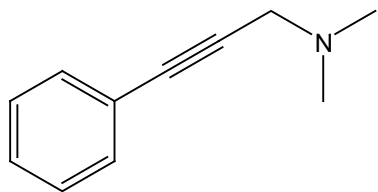

4qq

<sup>13</sup>C NMR (100 MHz, CDCl<sub>3</sub>)

131.832  
128.376  
128.146  
123.370

85.370  
84.739  
77.477  
77.160 CDCl<sub>3</sub>  
76.843

48.725  
44.401

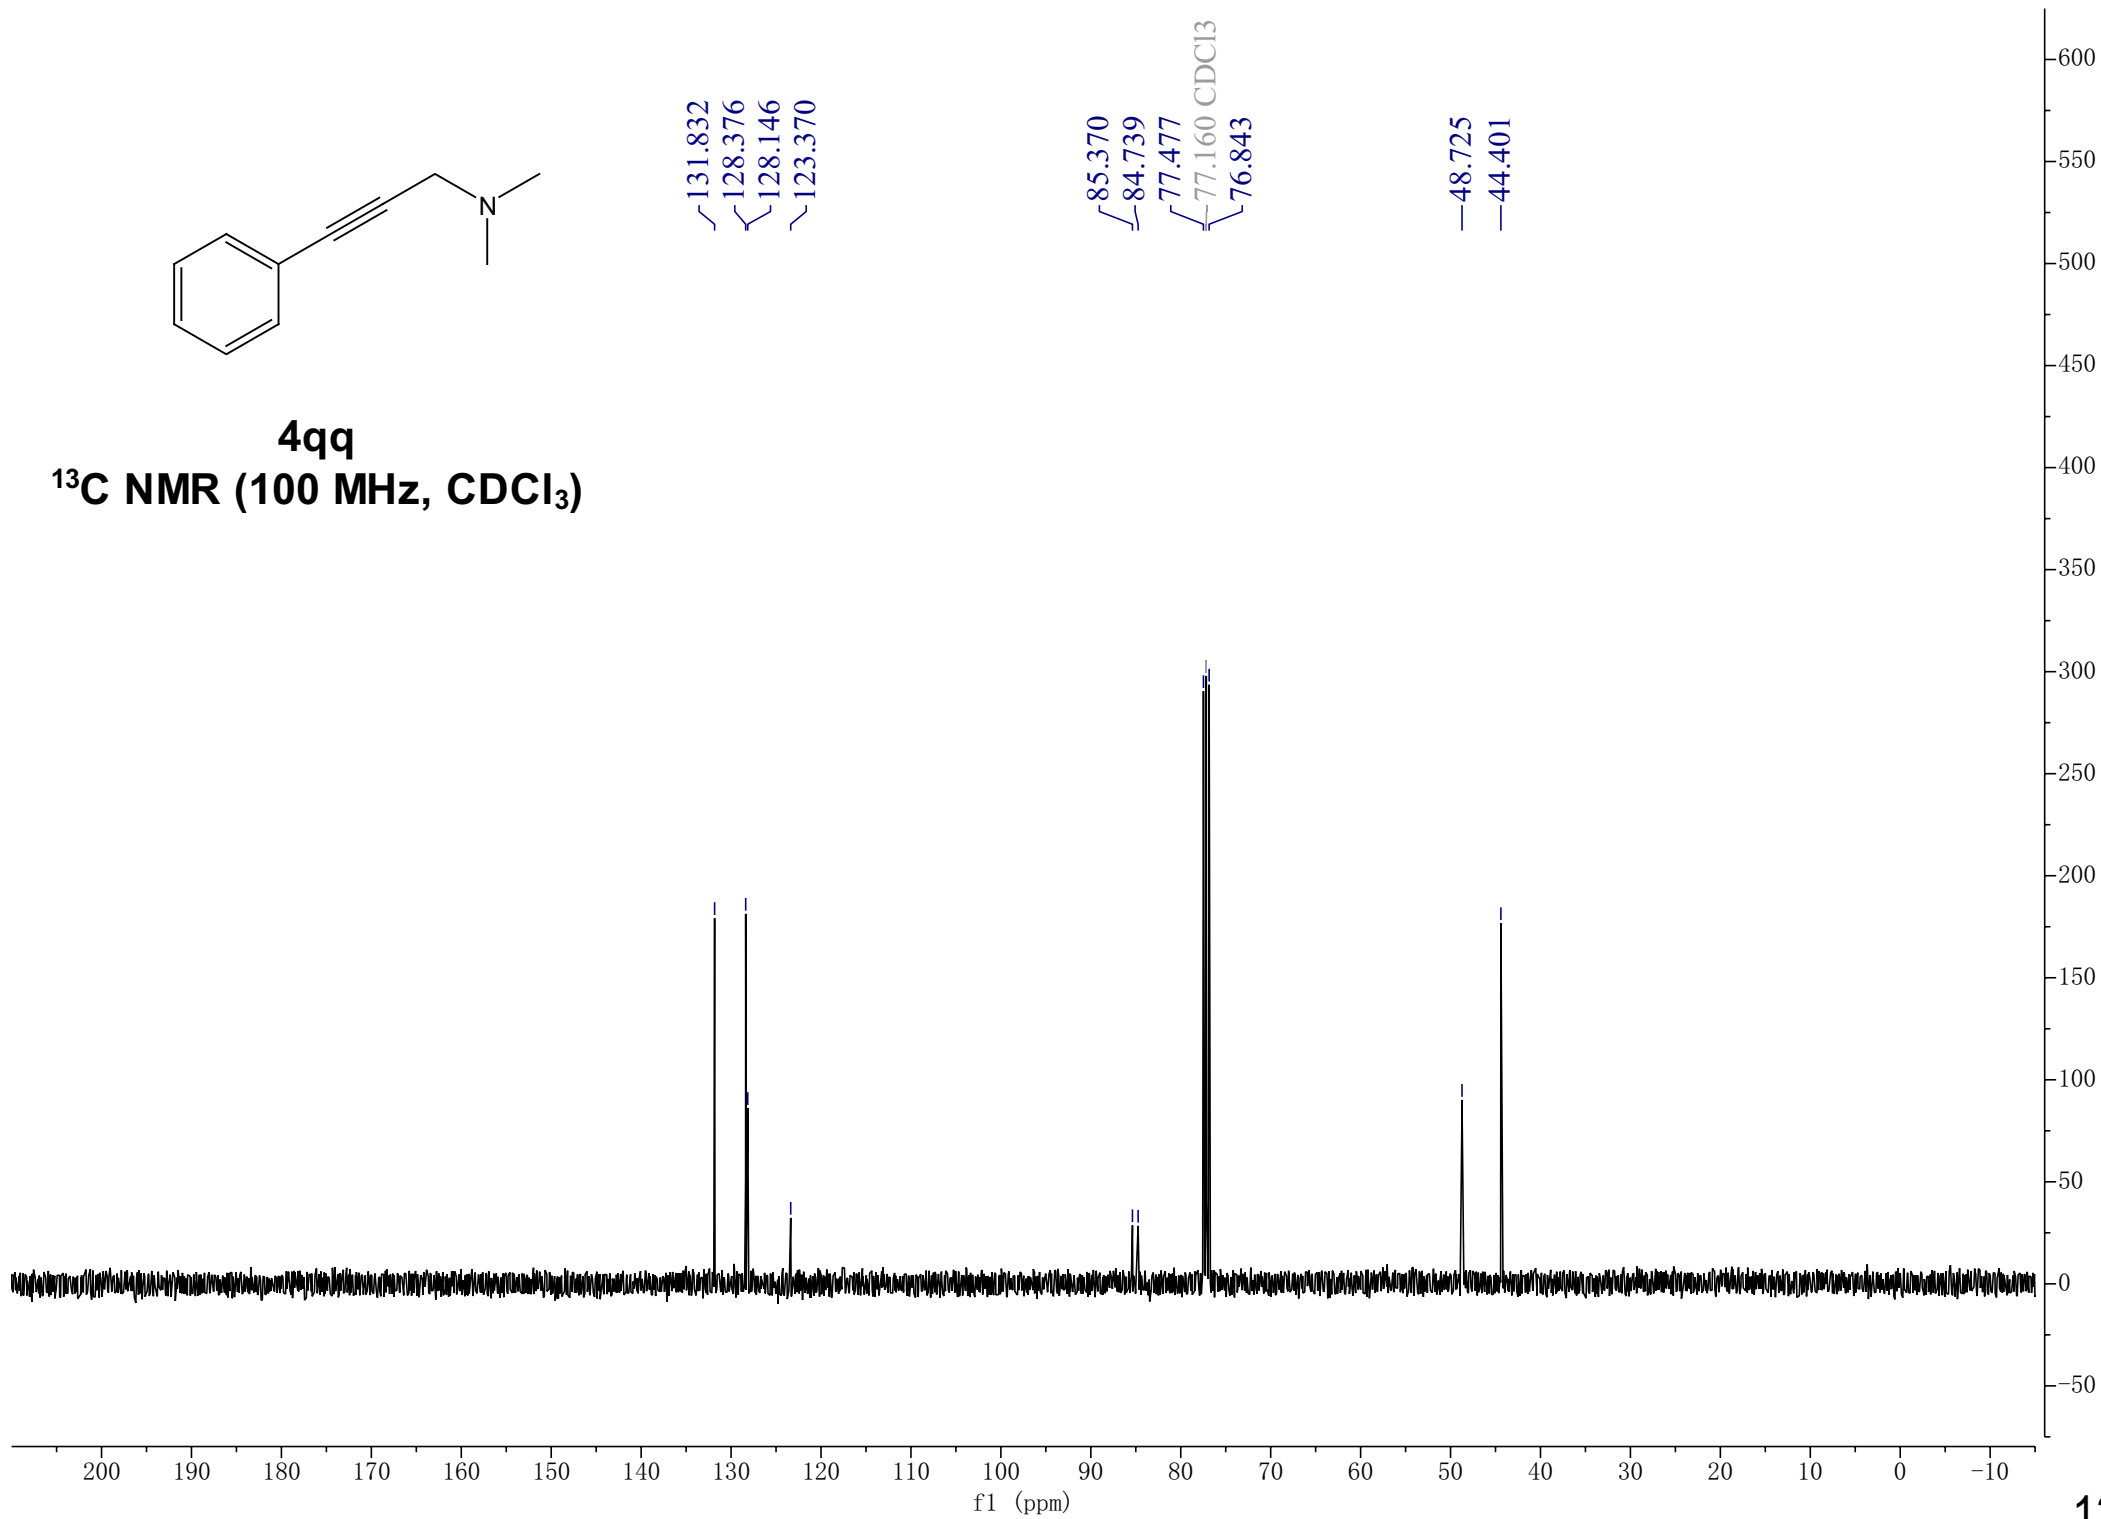

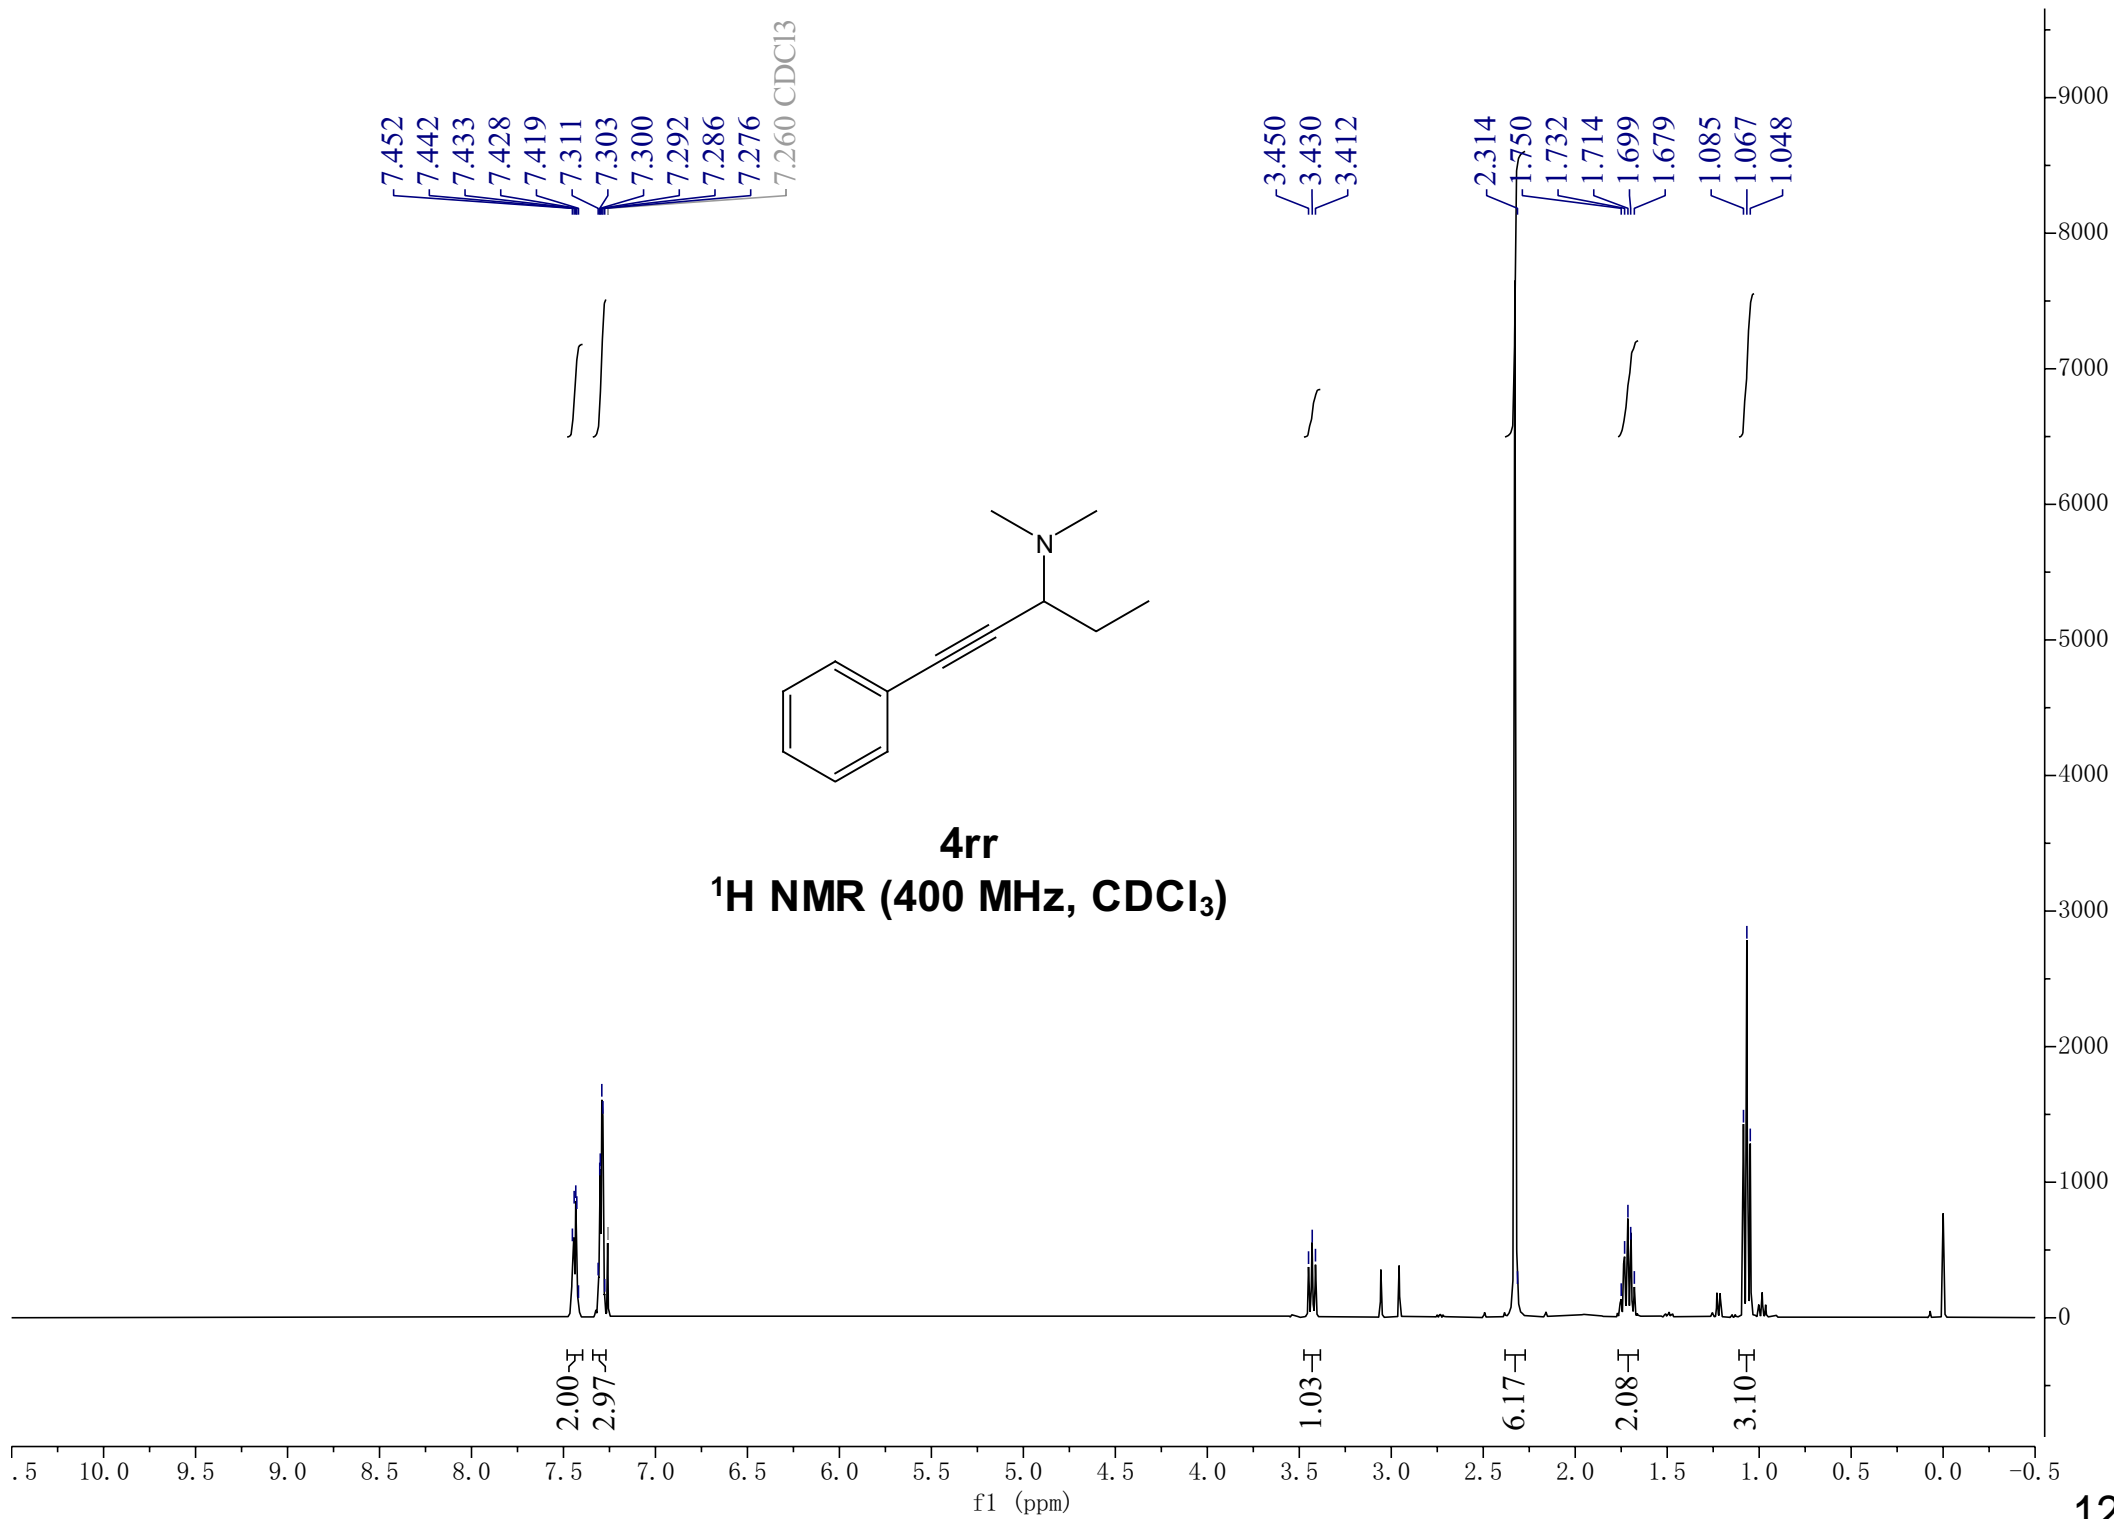

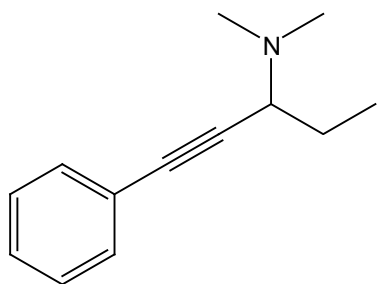

4rr

<sup>13</sup>C NMR (100 MHz, CDCl<sub>3</sub>)

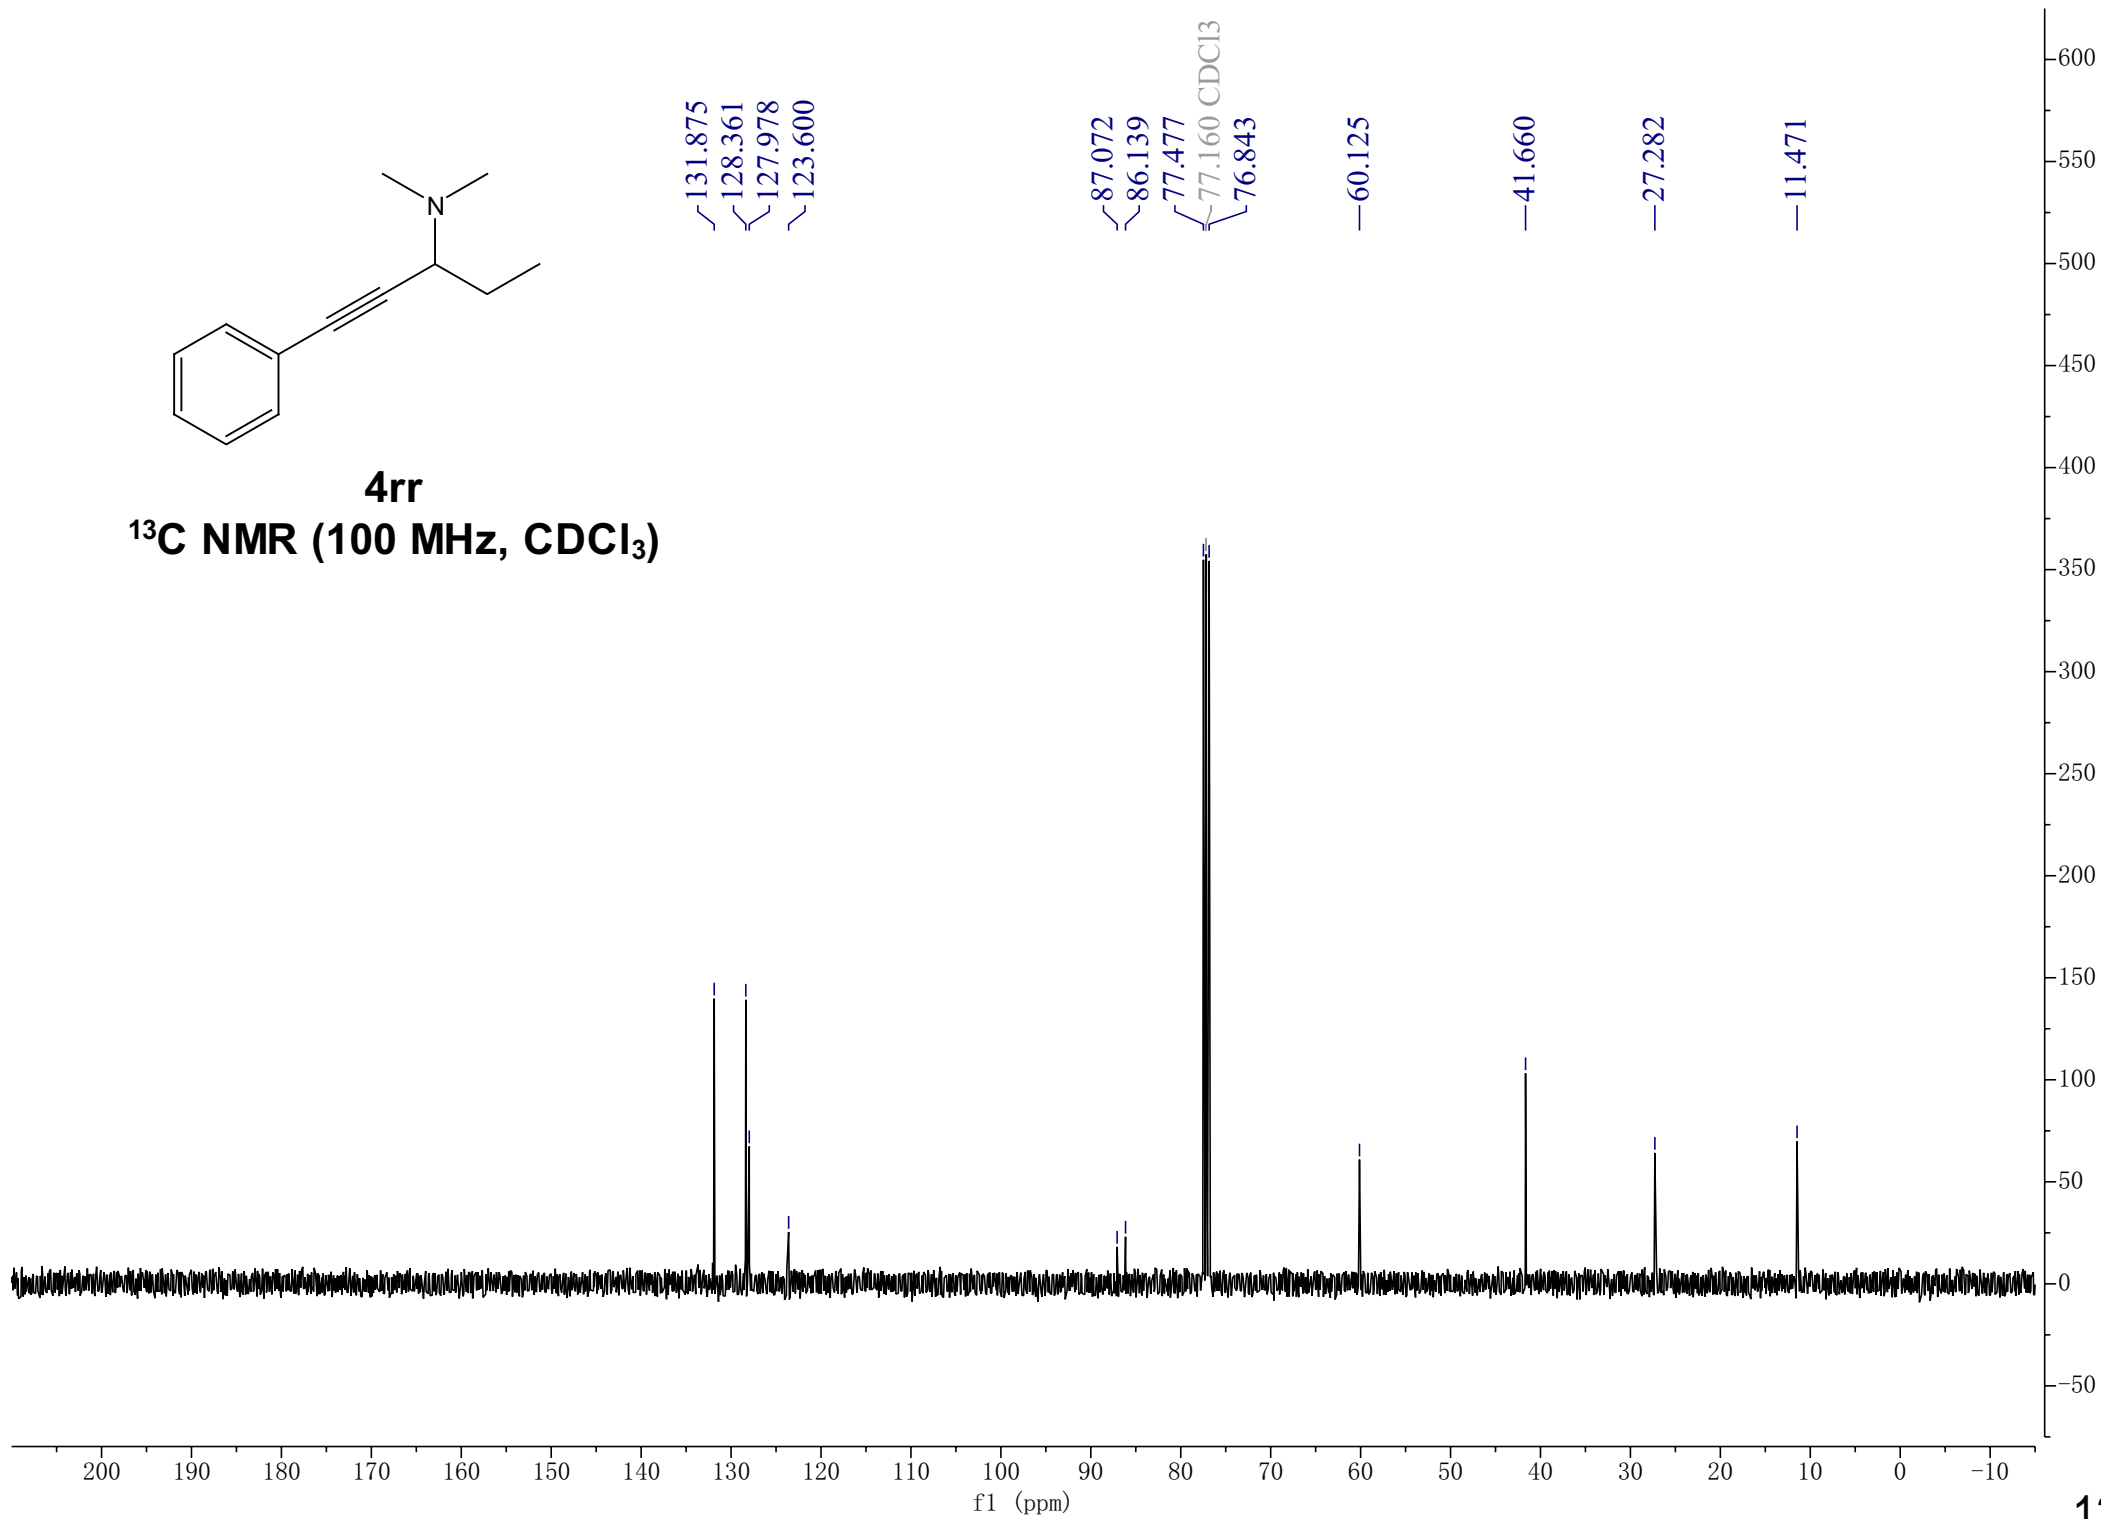

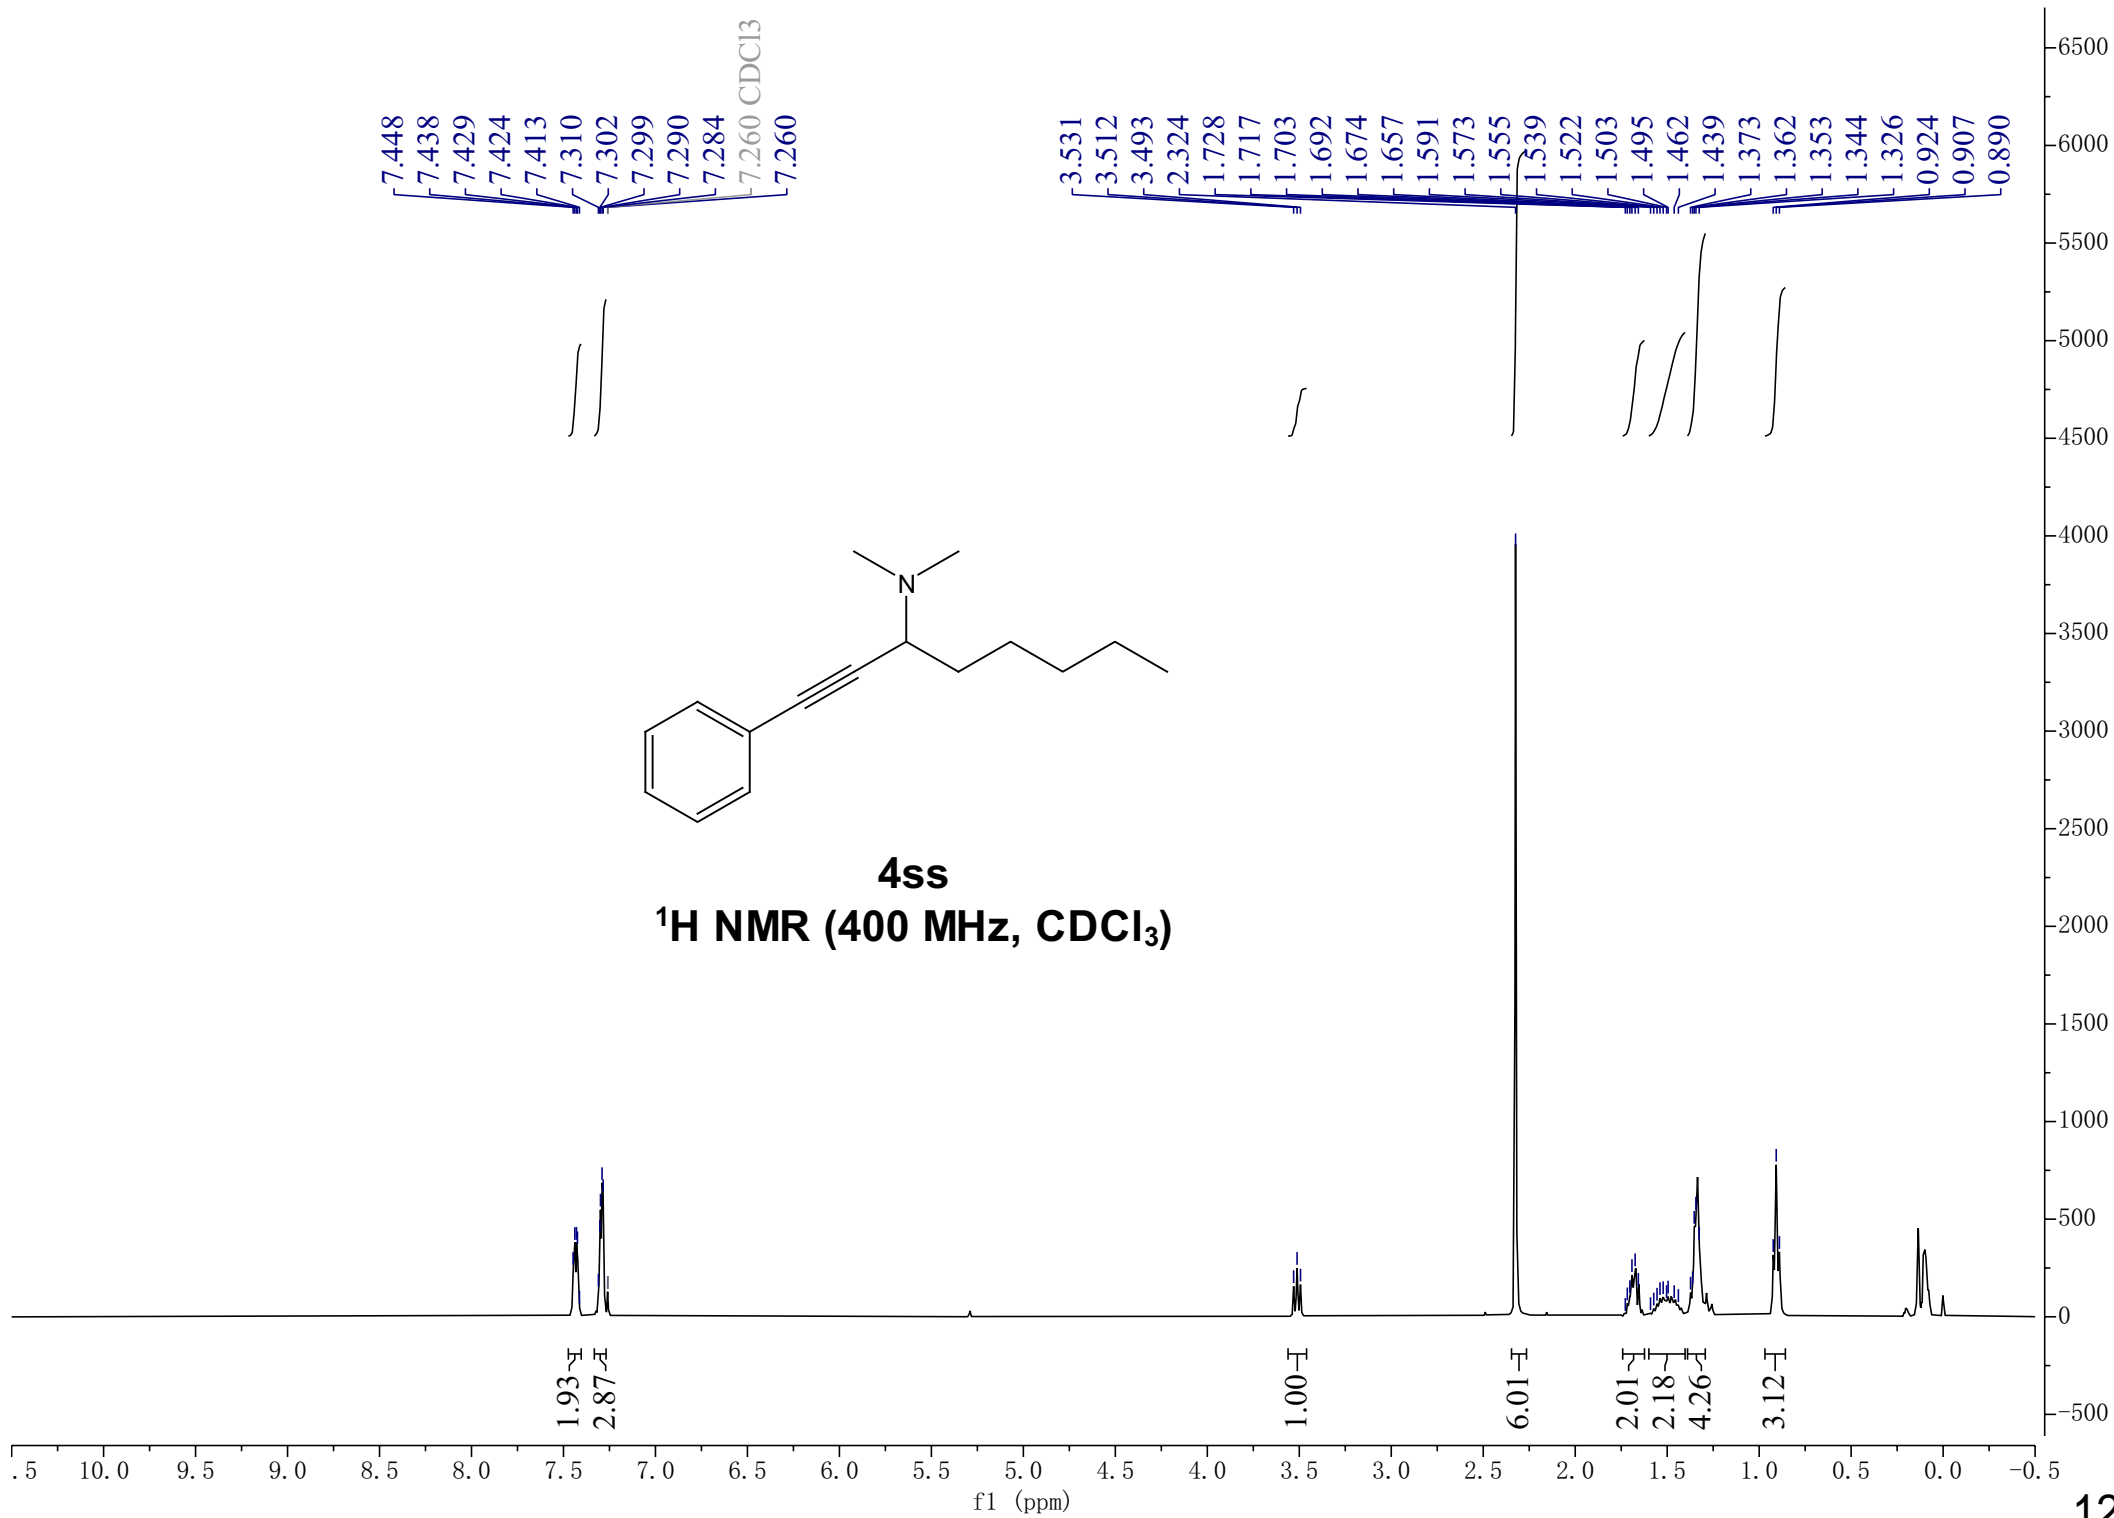

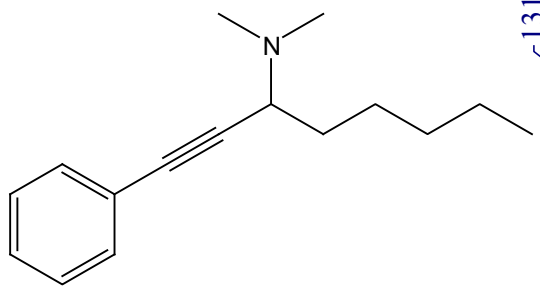

4ss

<sup>13</sup>C NMR (100 MHz, CDCl<sub>3</sub>)

131.865  
128.354  
127.964  
123.604

87.171  
86.084  
77.477  
77.160 CDCl<sub>3</sub>  
76.843

58.386

41.594  
34.092  
31.766  
26.549  
22.718

14.191

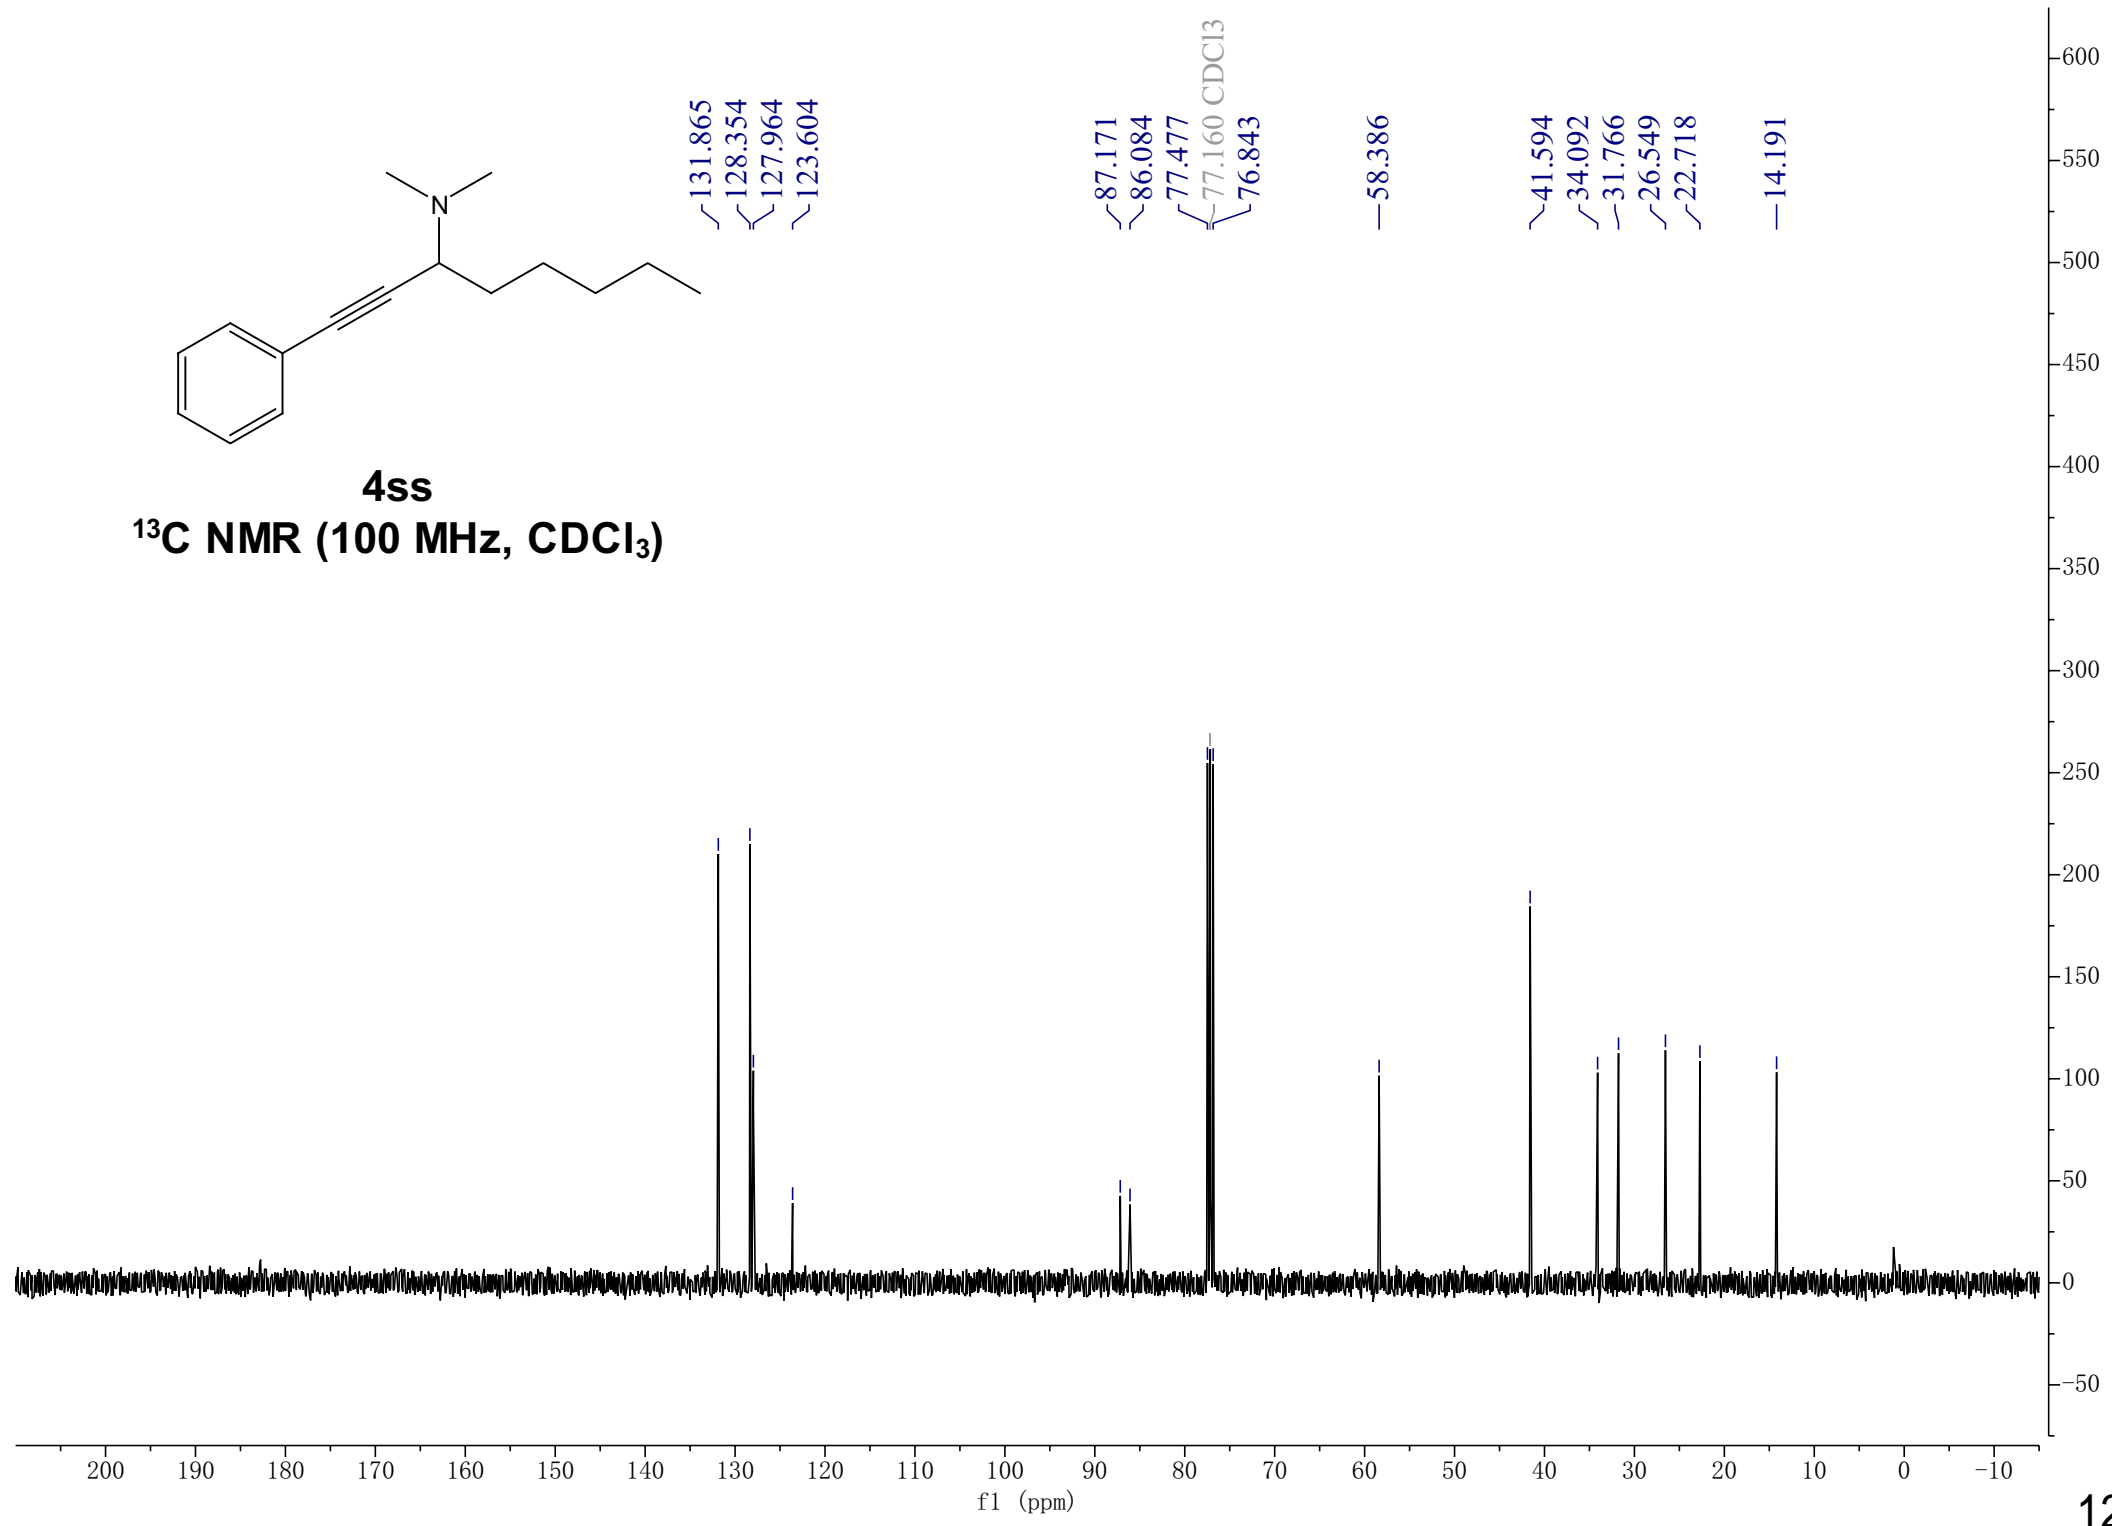

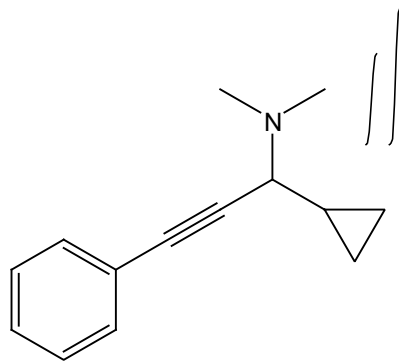

**4tt**

**<sup>1</sup>H NMR (400 MHz, CDCl<sub>3</sub>)**

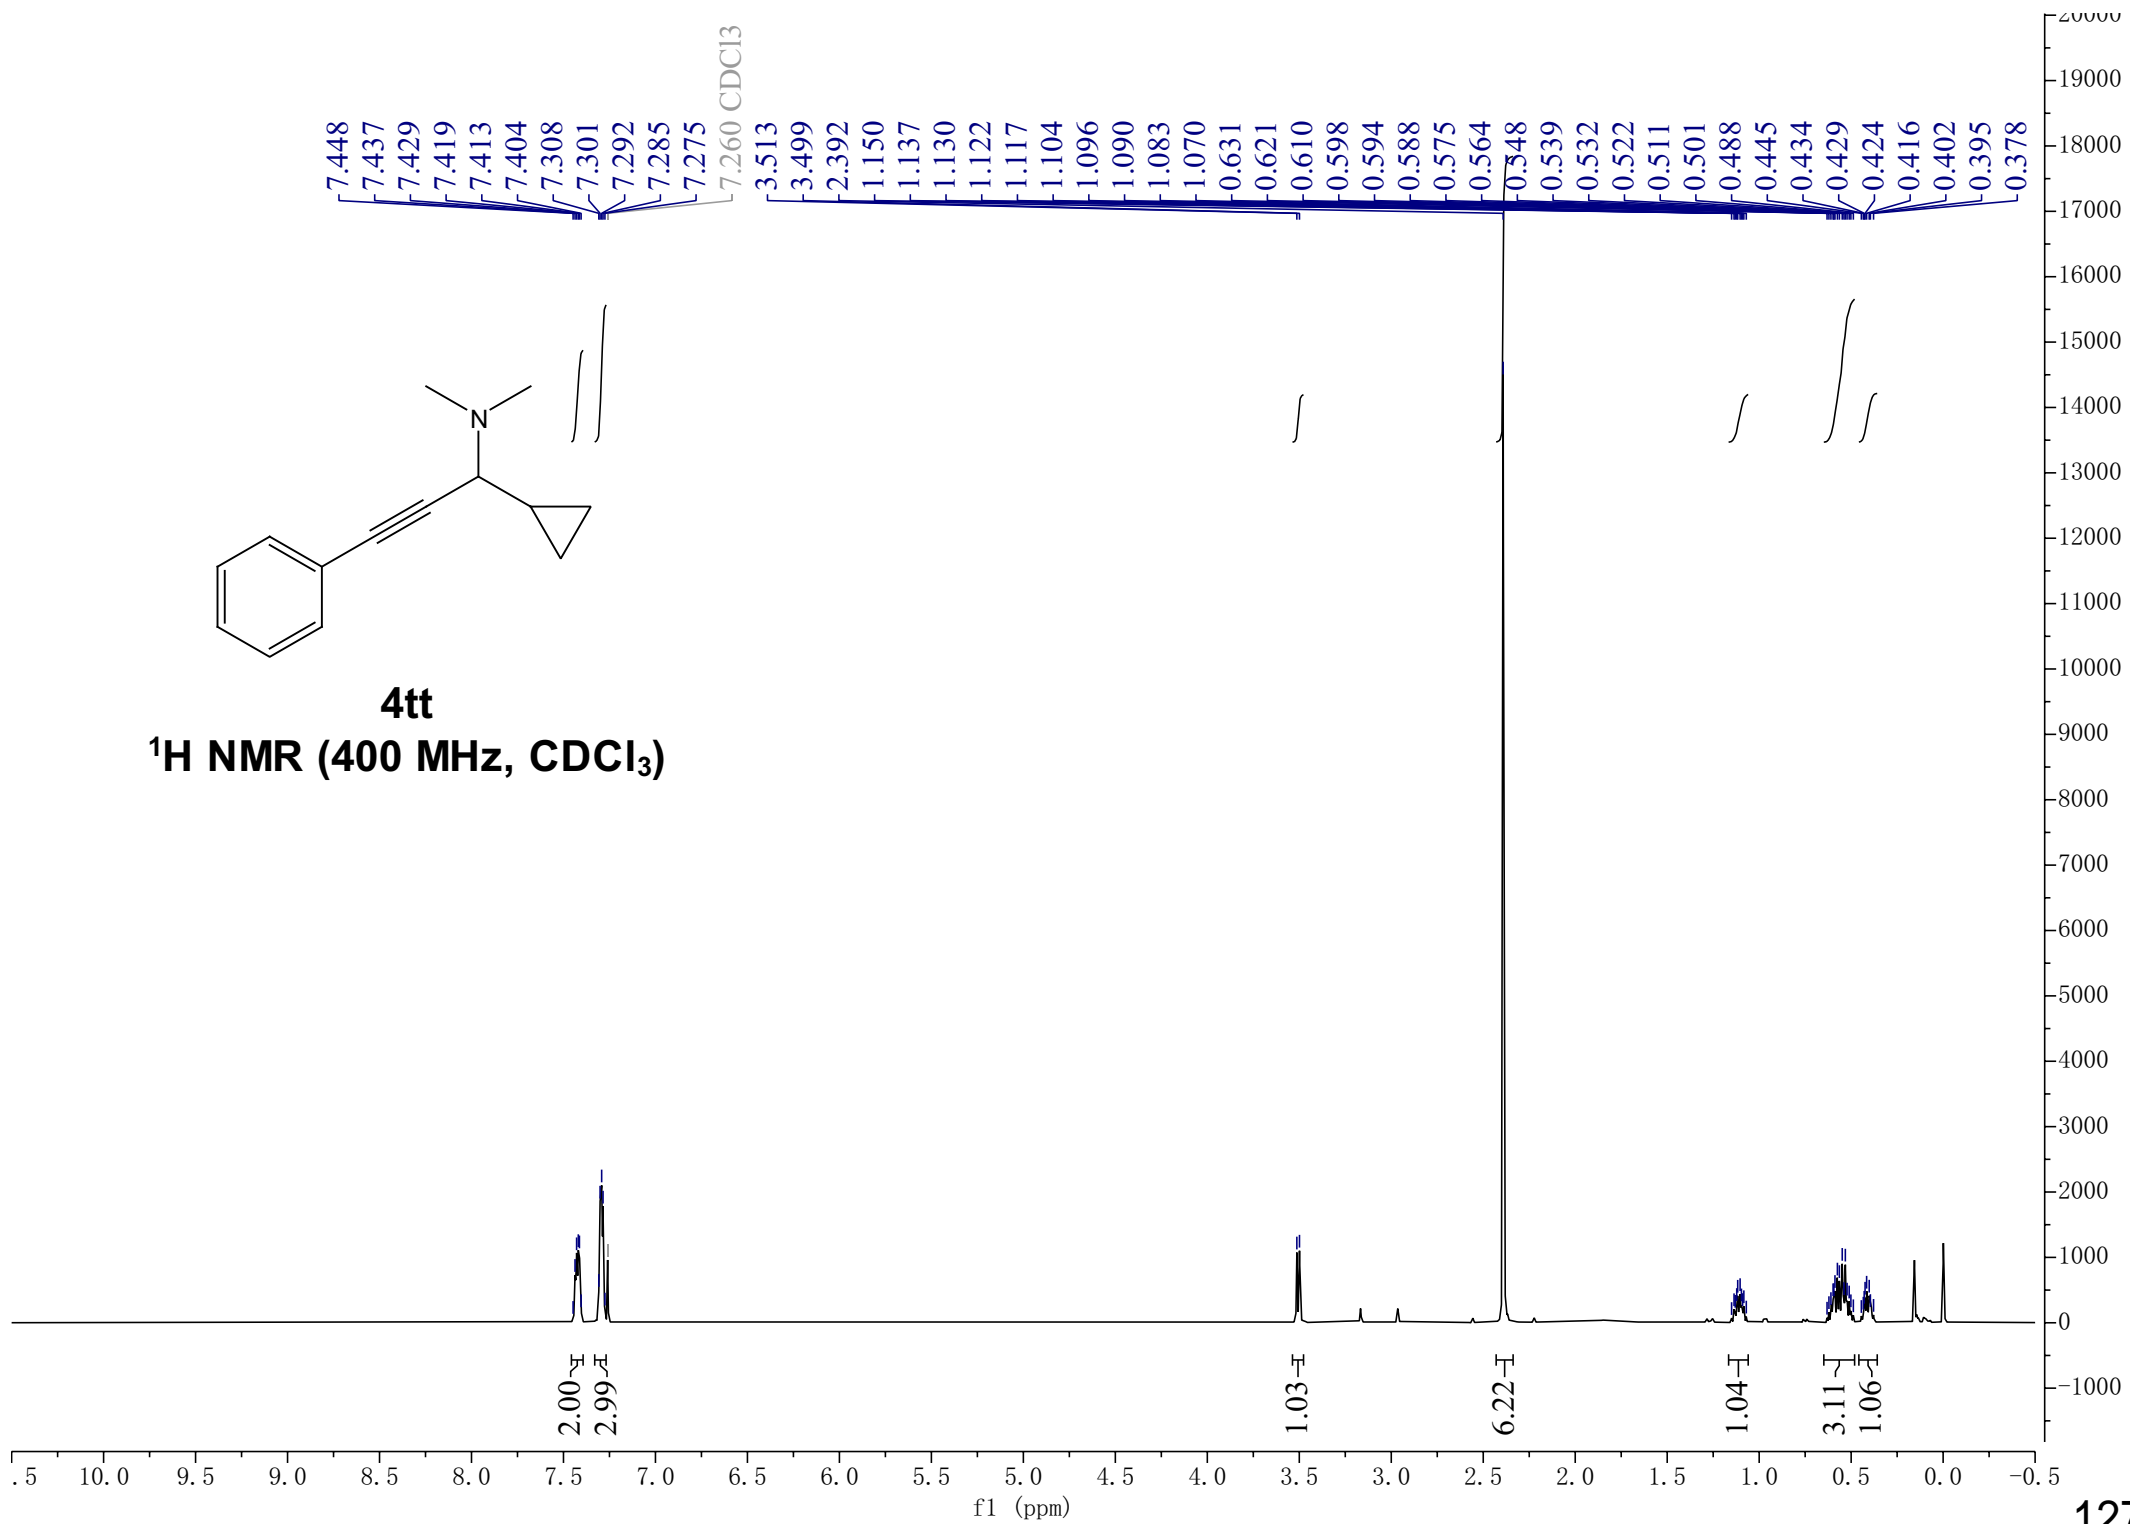



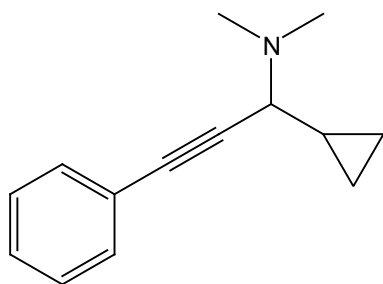

4tt

<sup>13</sup>C NMR (100 MHz, CDCl<sub>3</sub>)

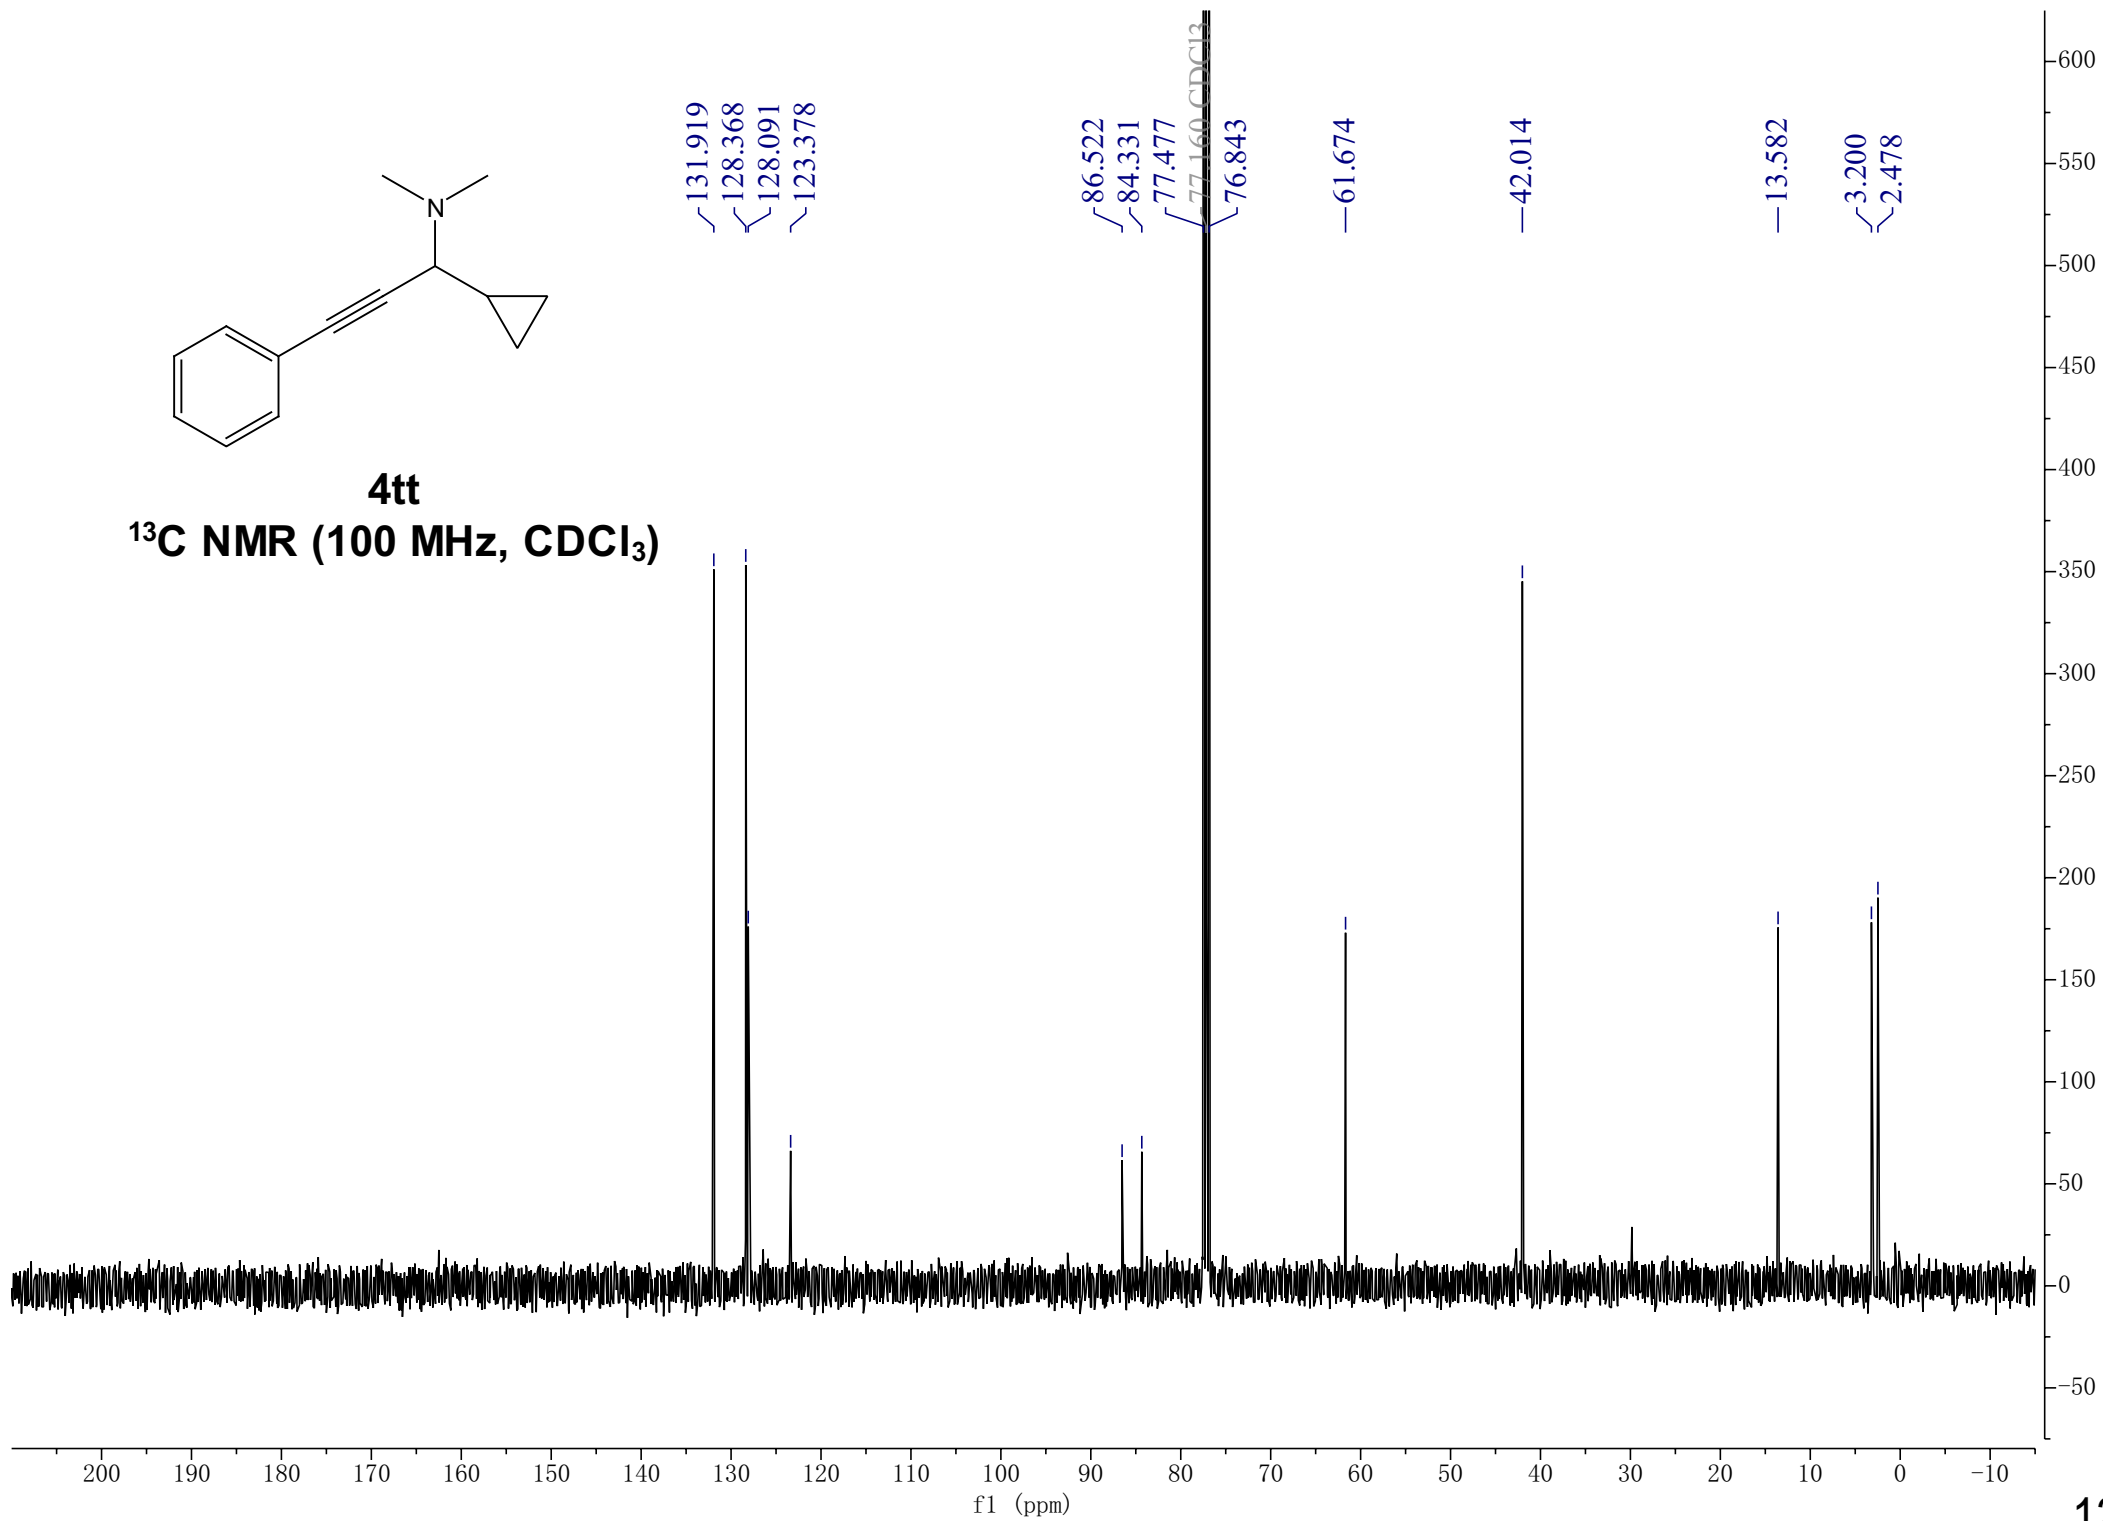

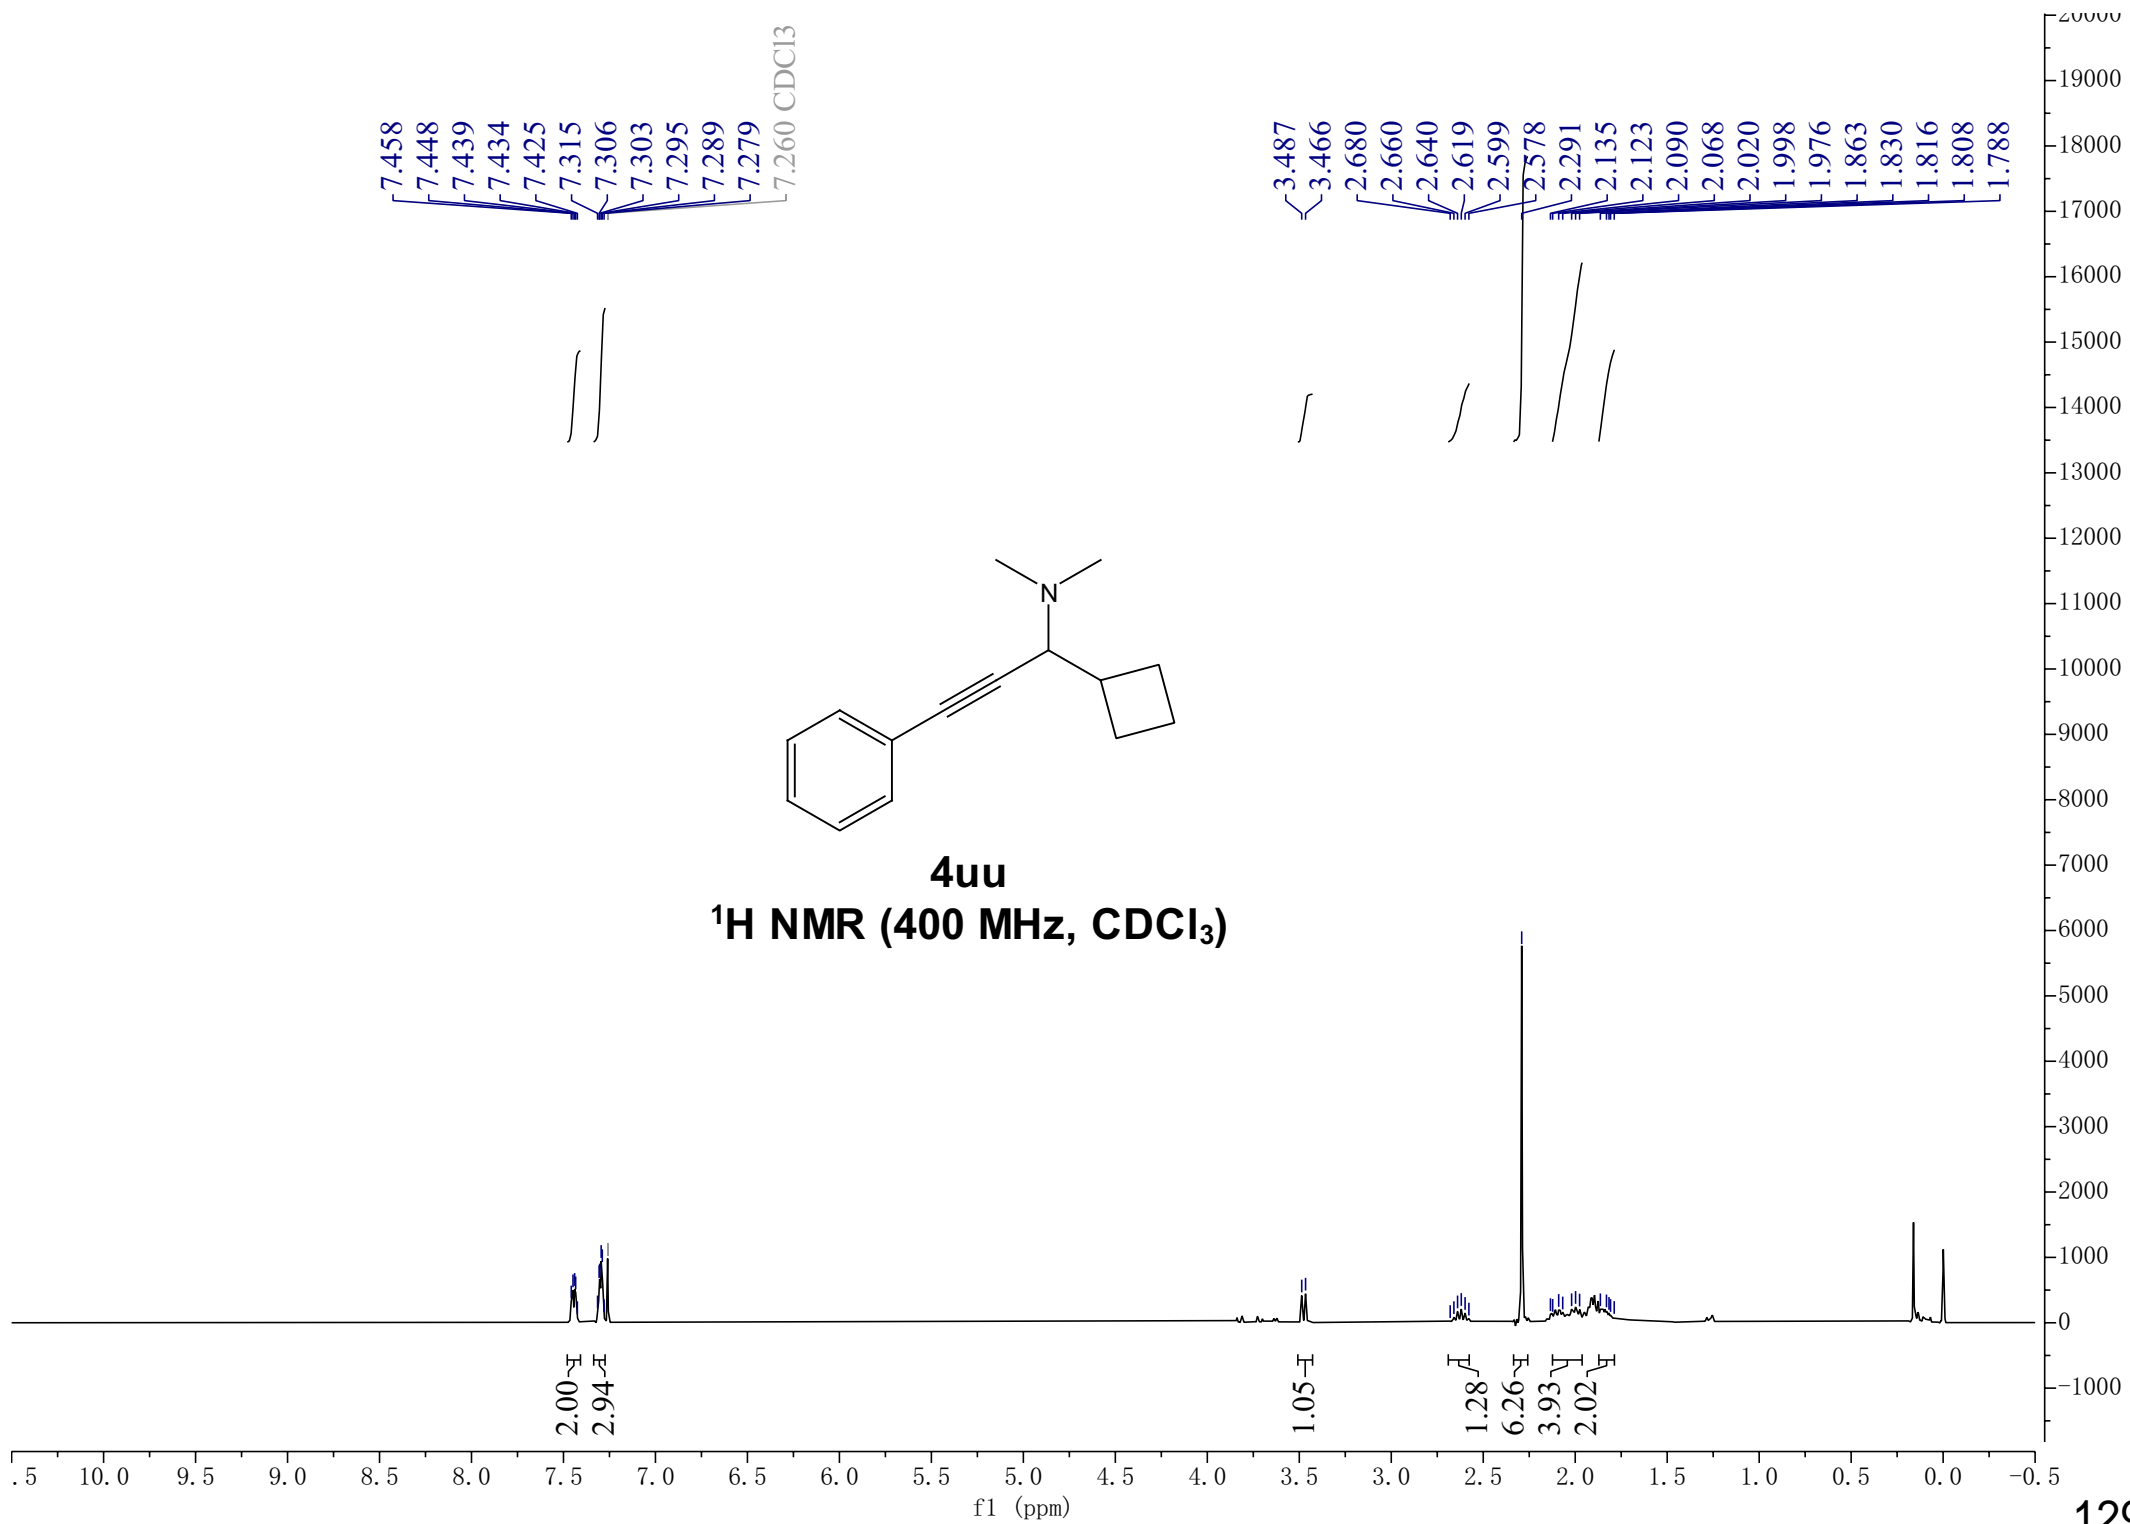

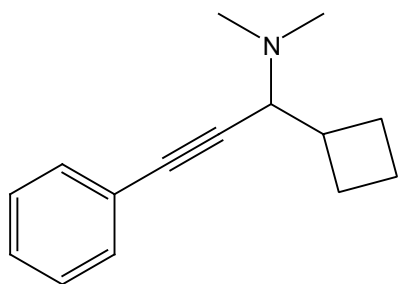

4uu

<sup>13</sup>C NMR (100 MHz, CDCl<sub>3</sub>)

131.934  
128.369  
127.989  
123.622

86.868  
85.541  
77.477  
77.160  
76.839

64.058

42.032  
38.317

26.502  
26.301

18.332

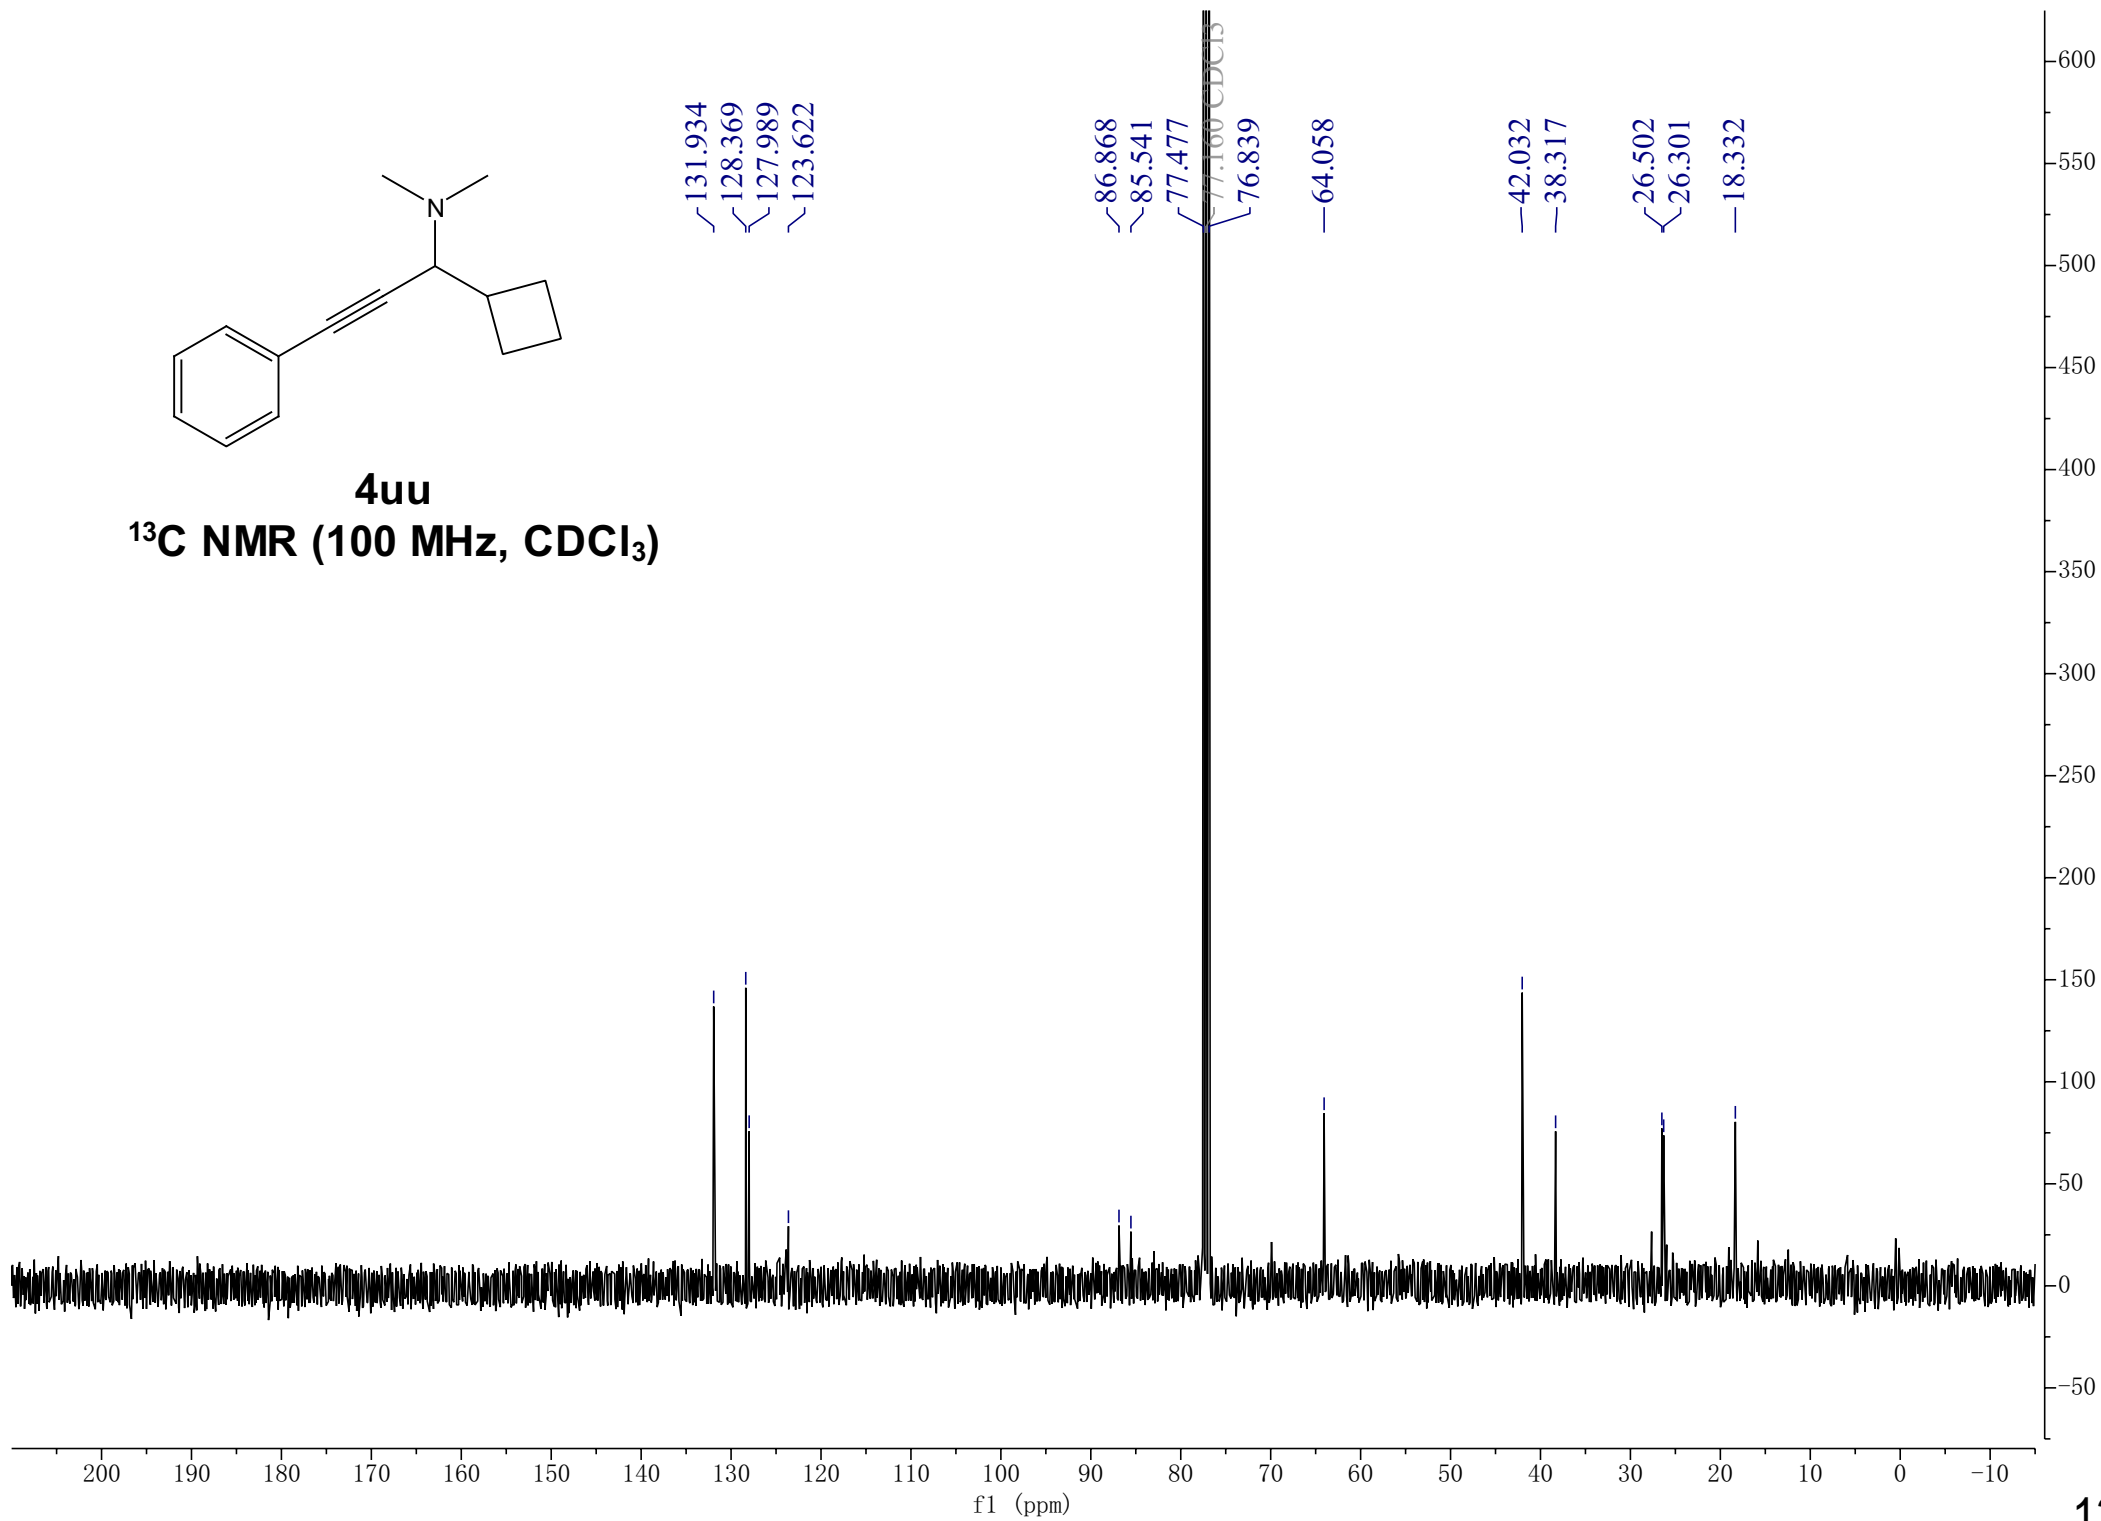

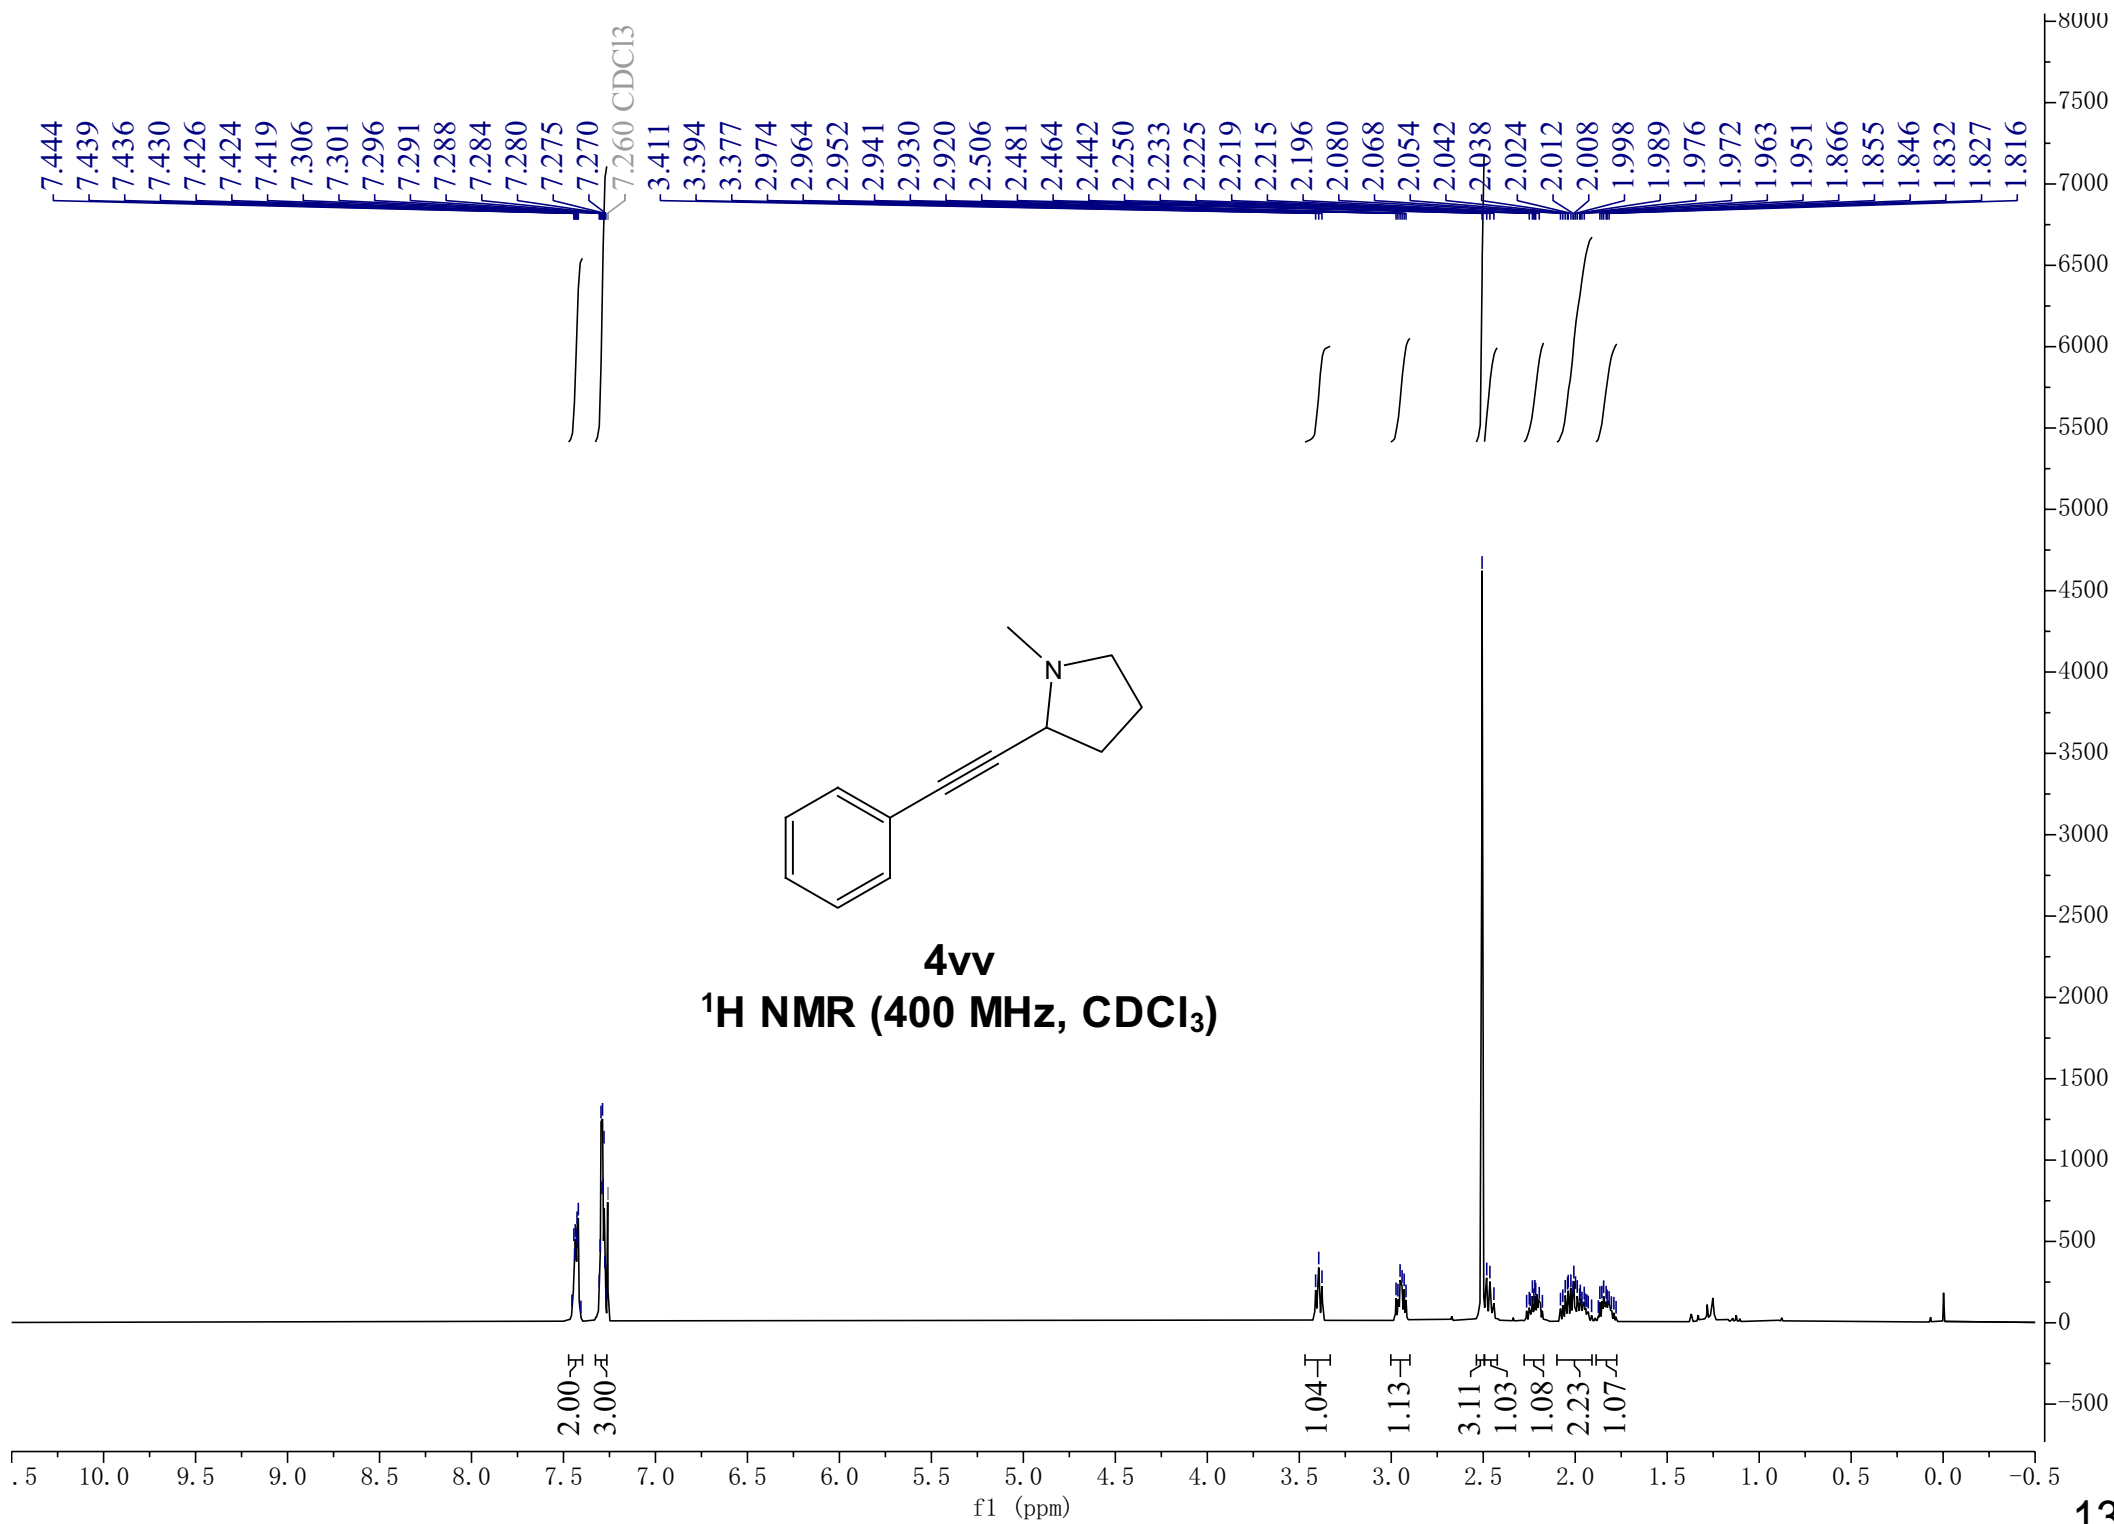

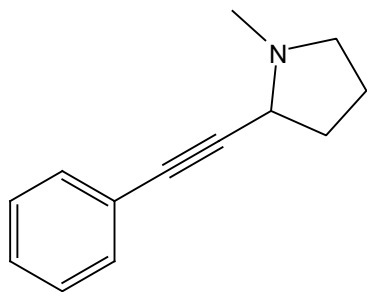

4vv

<sup>13</sup>C NMR (100 MHz, CDCl<sub>3</sub>)

131.854  
128.343  
128.146  
123.323

88.487  
84.655  
77.477  
77.160 CDCl<sub>3</sub>  
76.839

57.190  
54.860

39.892

32.393

22.550

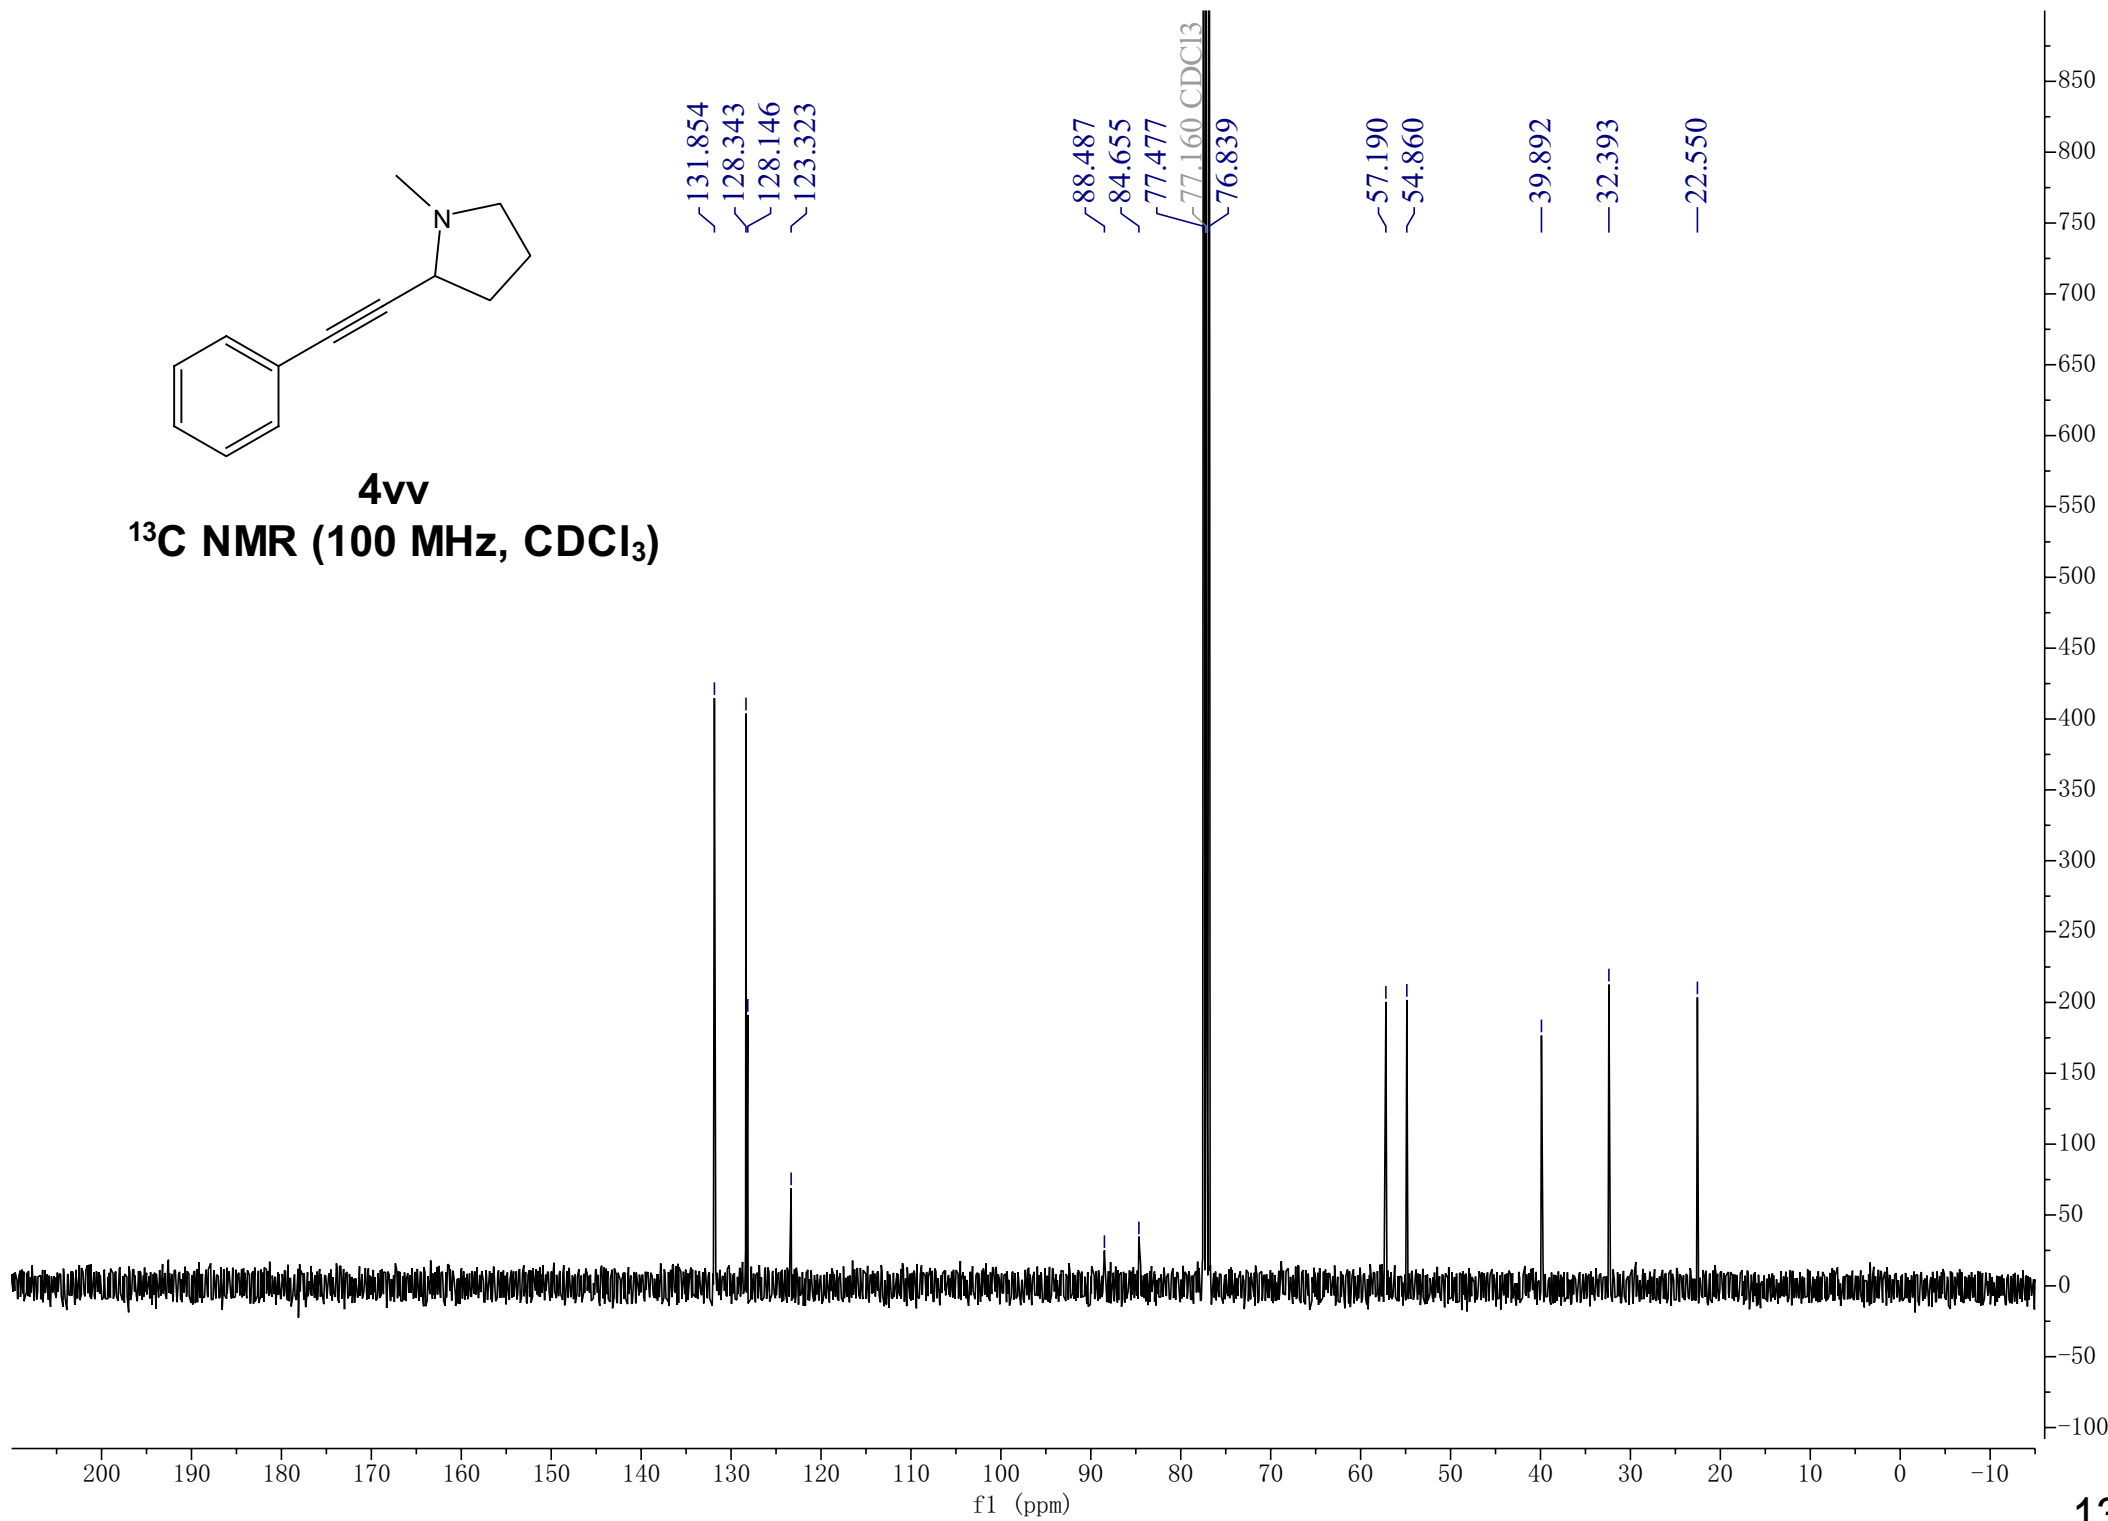

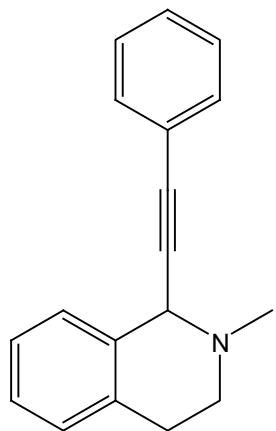

**4ww**

**$^1\text{H}$  NMR (400 MHz,  $\text{CDCl}_3$ )**

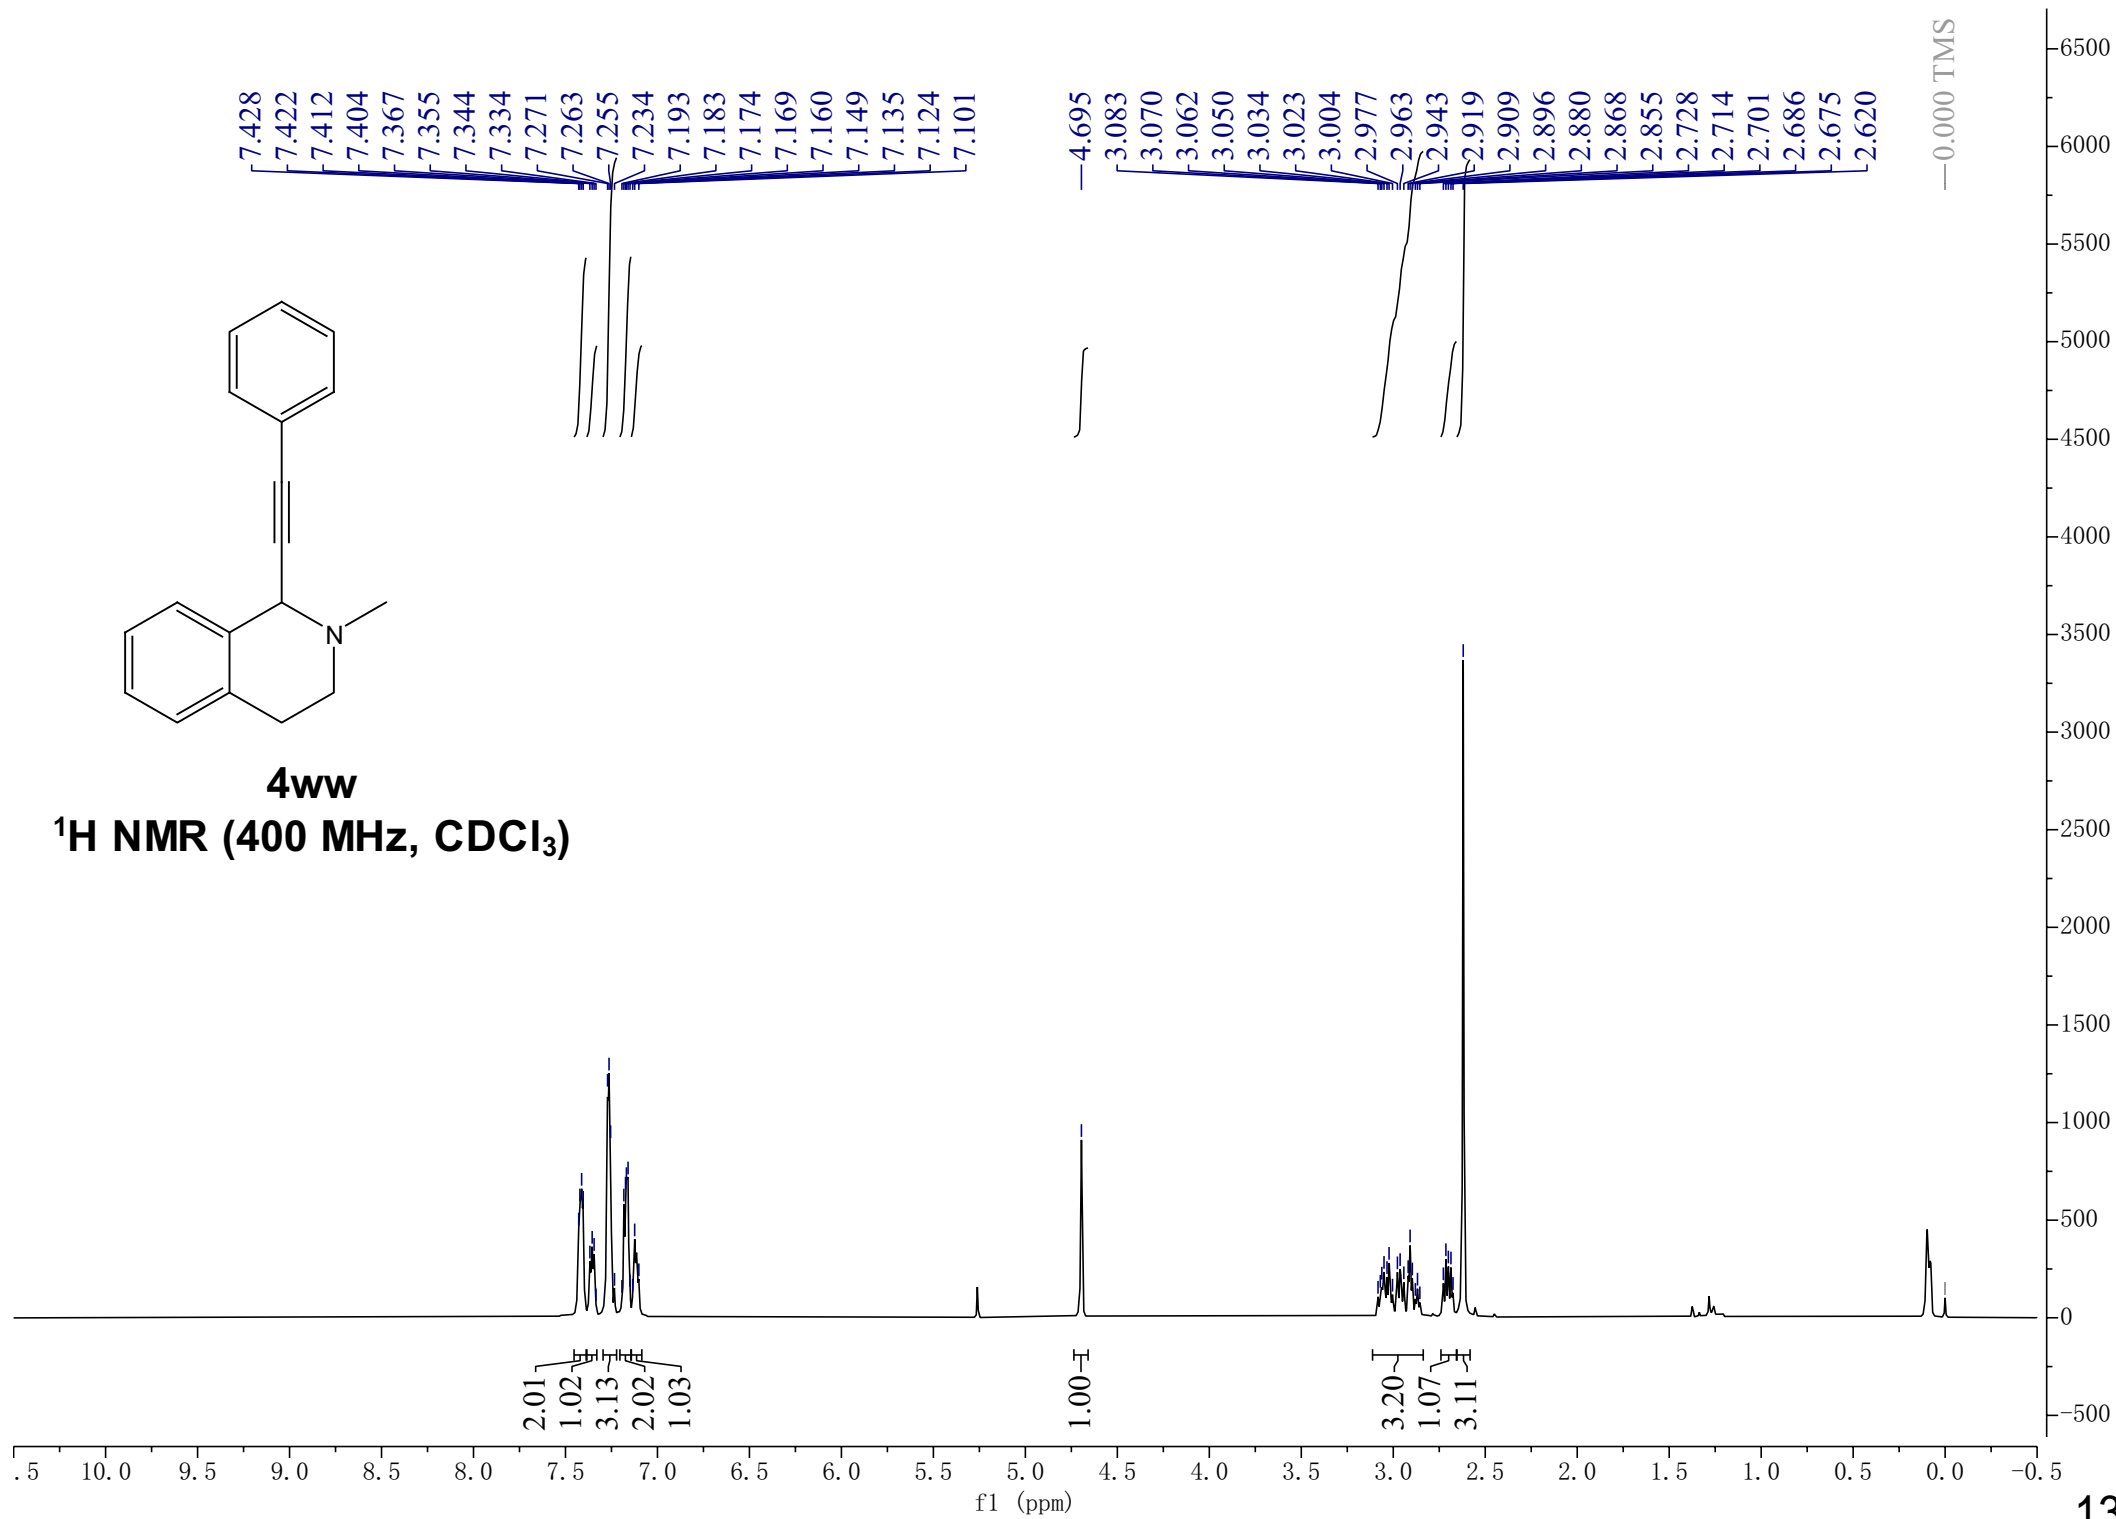

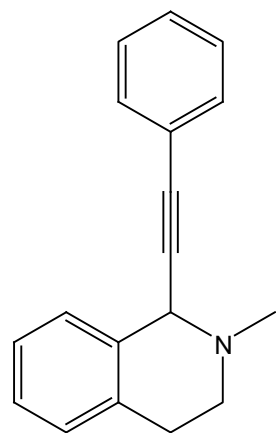

**4ww**

**<sup>13</sup>C NMR (100 MHz, CDCl<sub>3</sub>)**

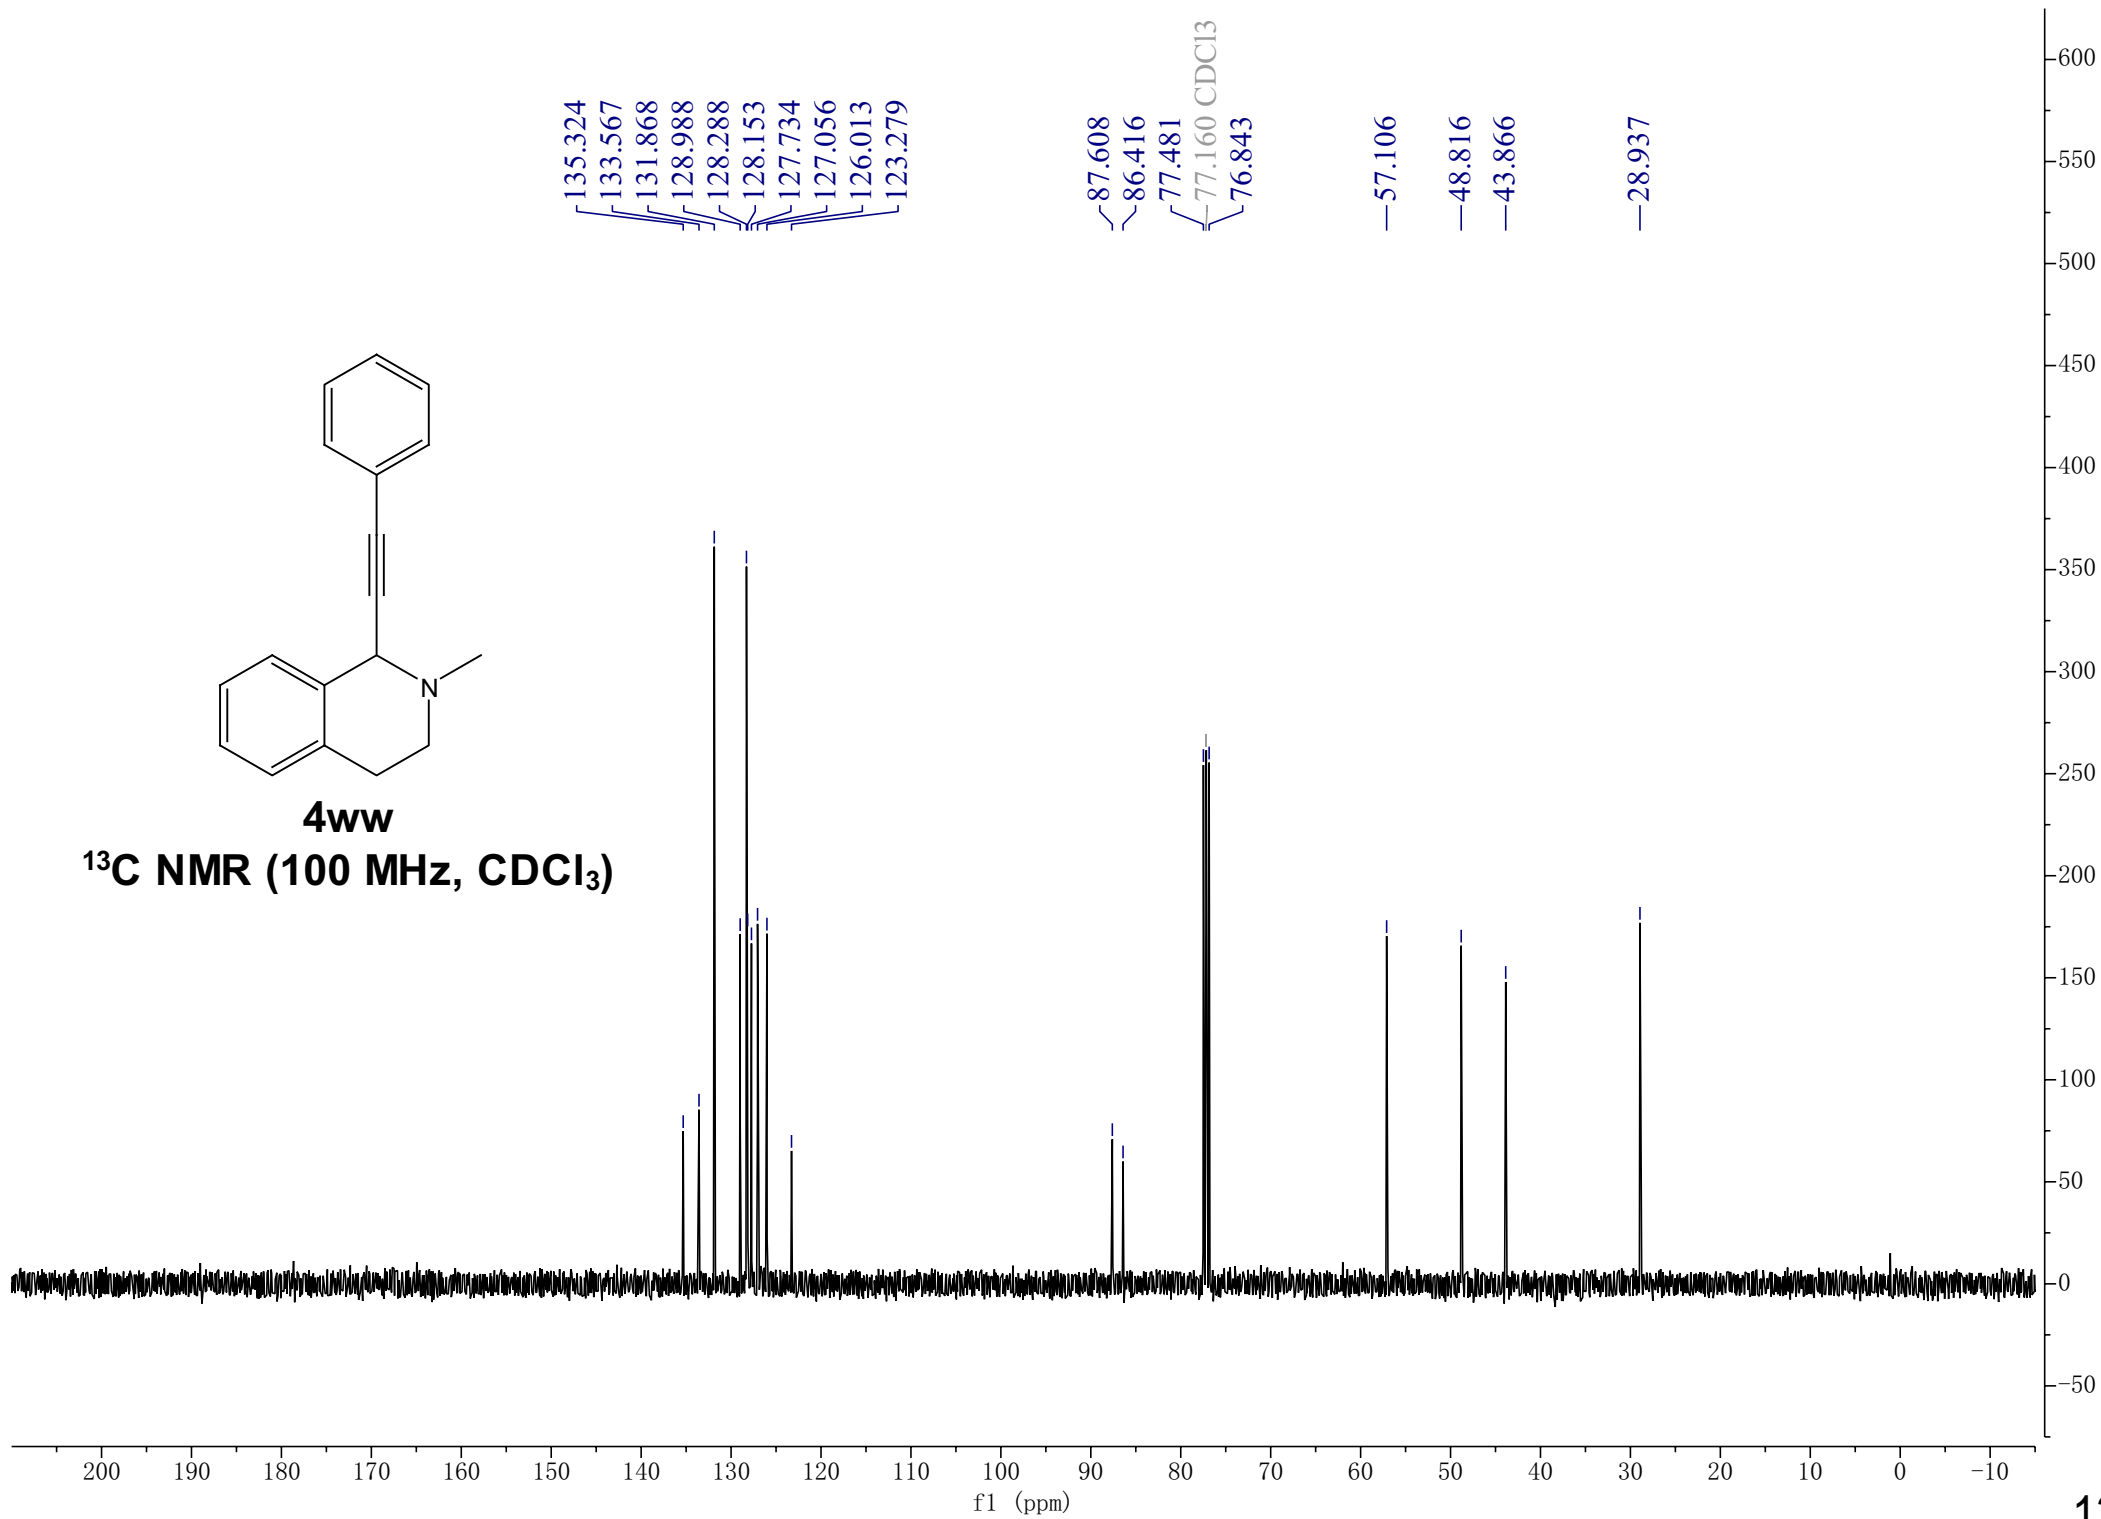

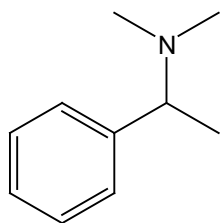

5a

<sup>1</sup>H NMR (500 MHz, CDCl<sub>3</sub>)

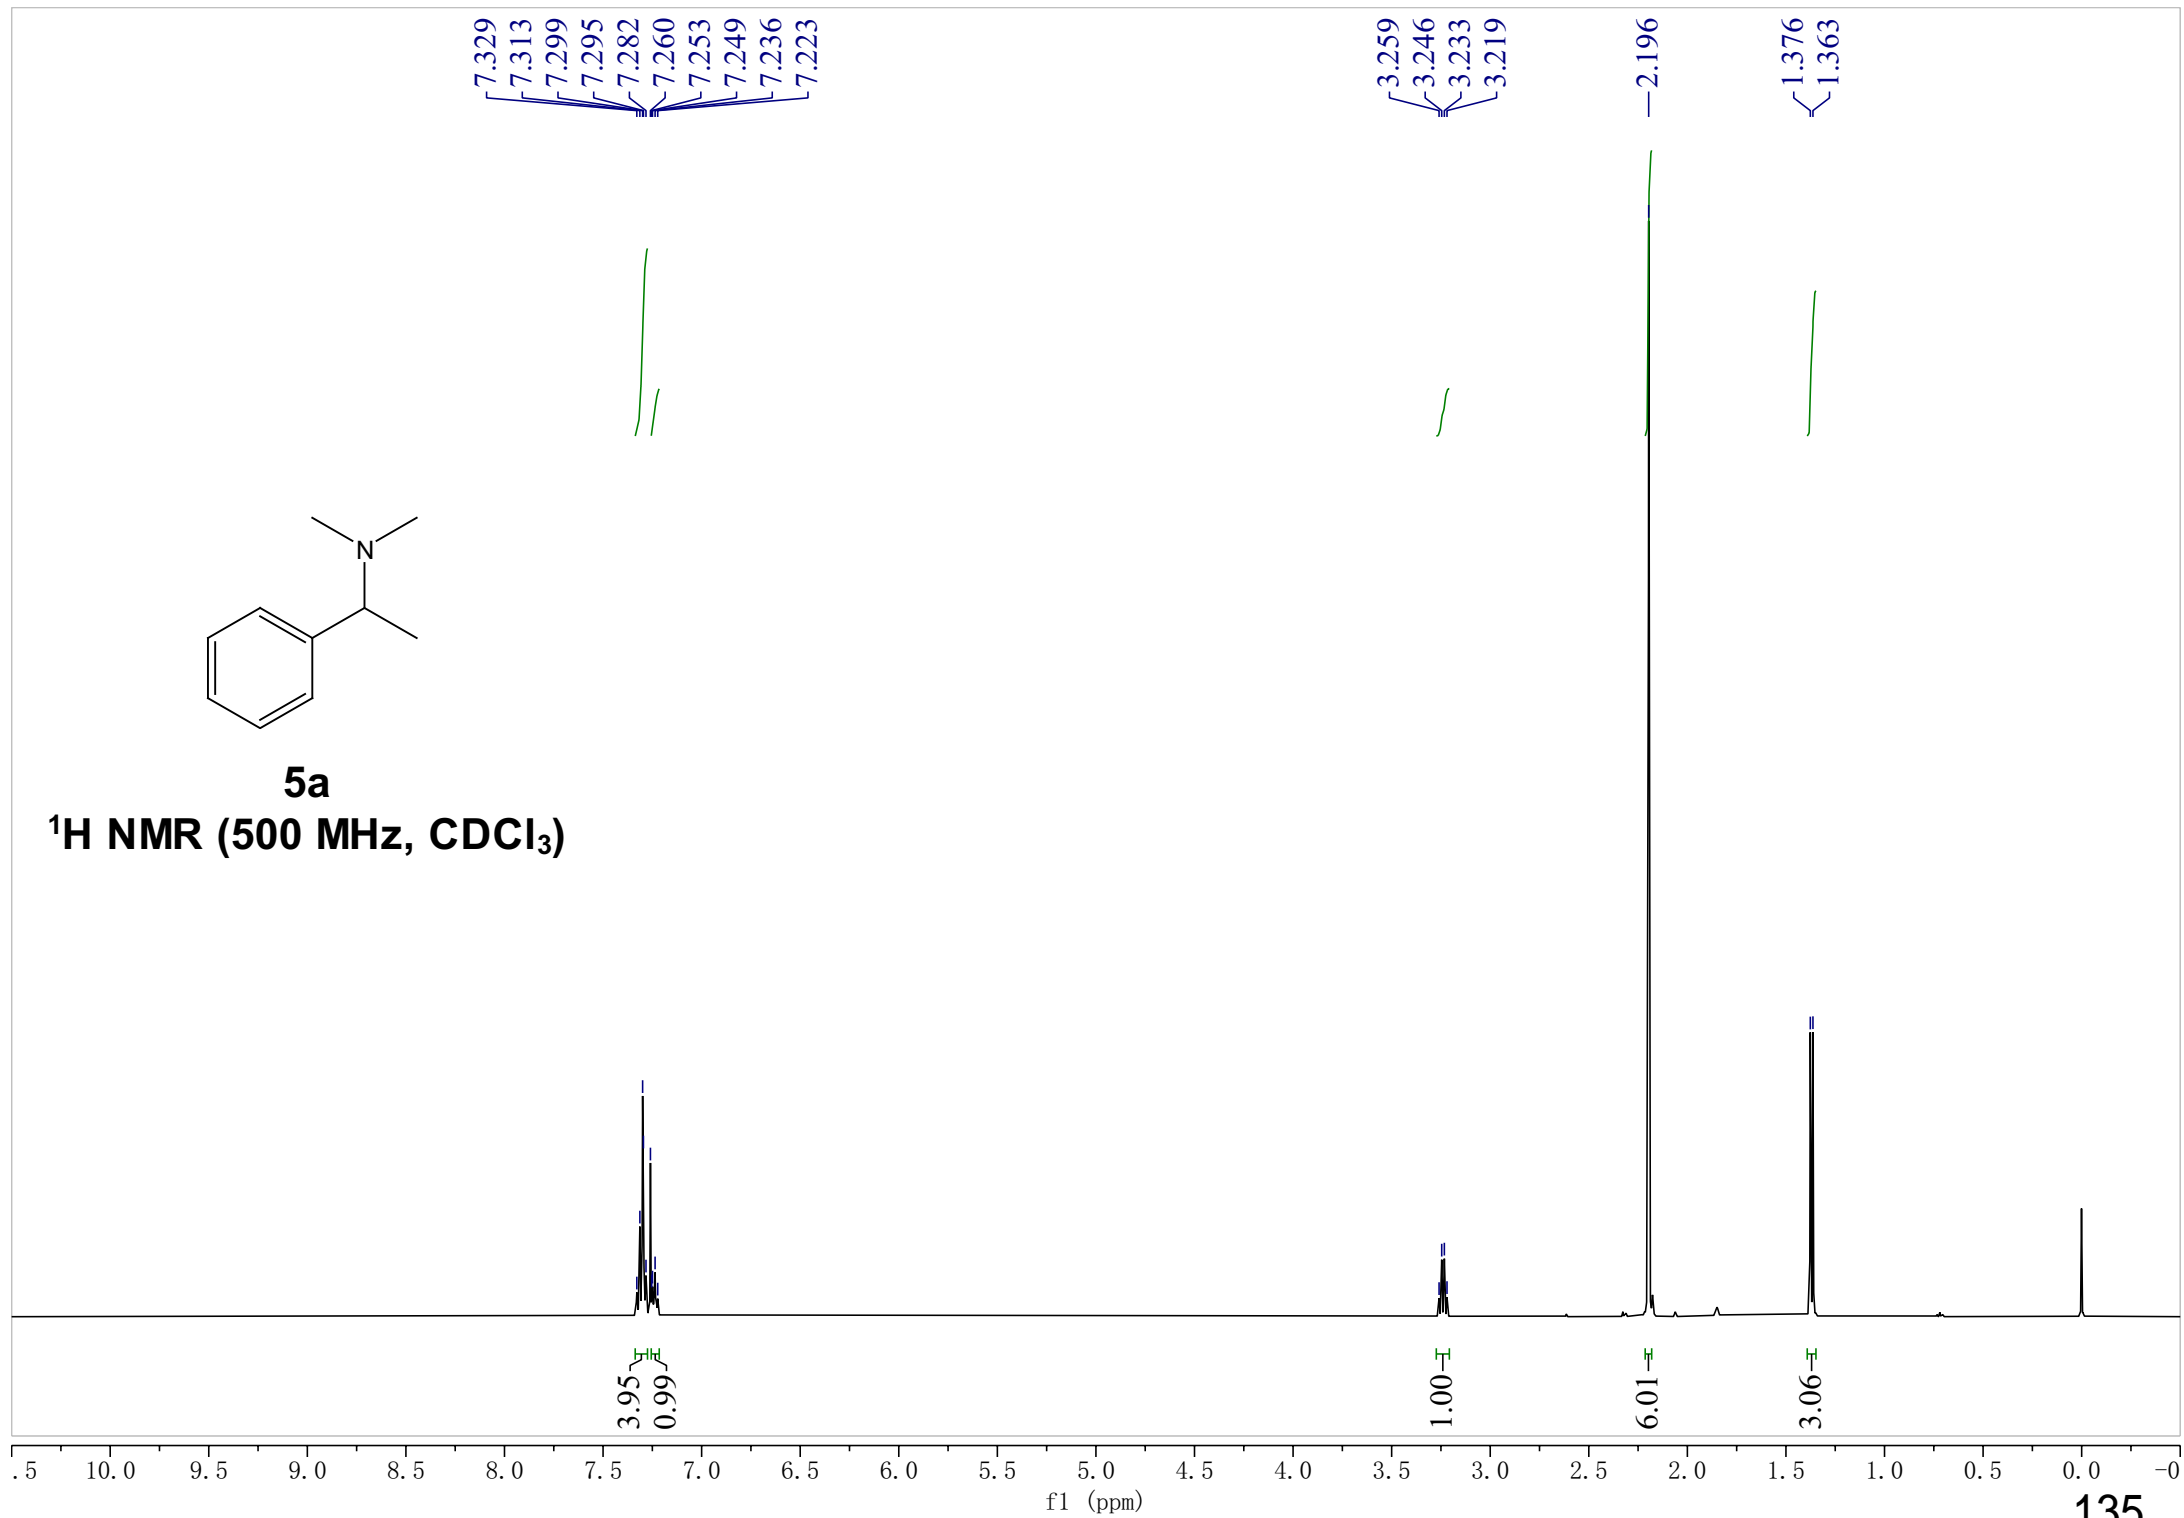



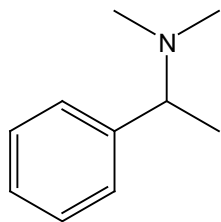

5a

<sup>13</sup>C NMR (125 MHz, CDCl<sub>3</sub>)

—144.274

—128.341

—127.667

—127.016

—77.414

—77.161

—76.906

—66.138

—43.410

—20.400

f1 (ppm)

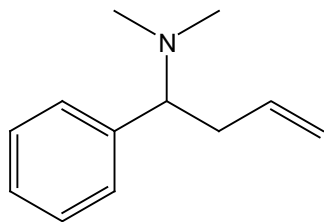

**5b**

**<sup>1</sup>H NMR (500 MHz, CDCl<sub>3</sub>)**

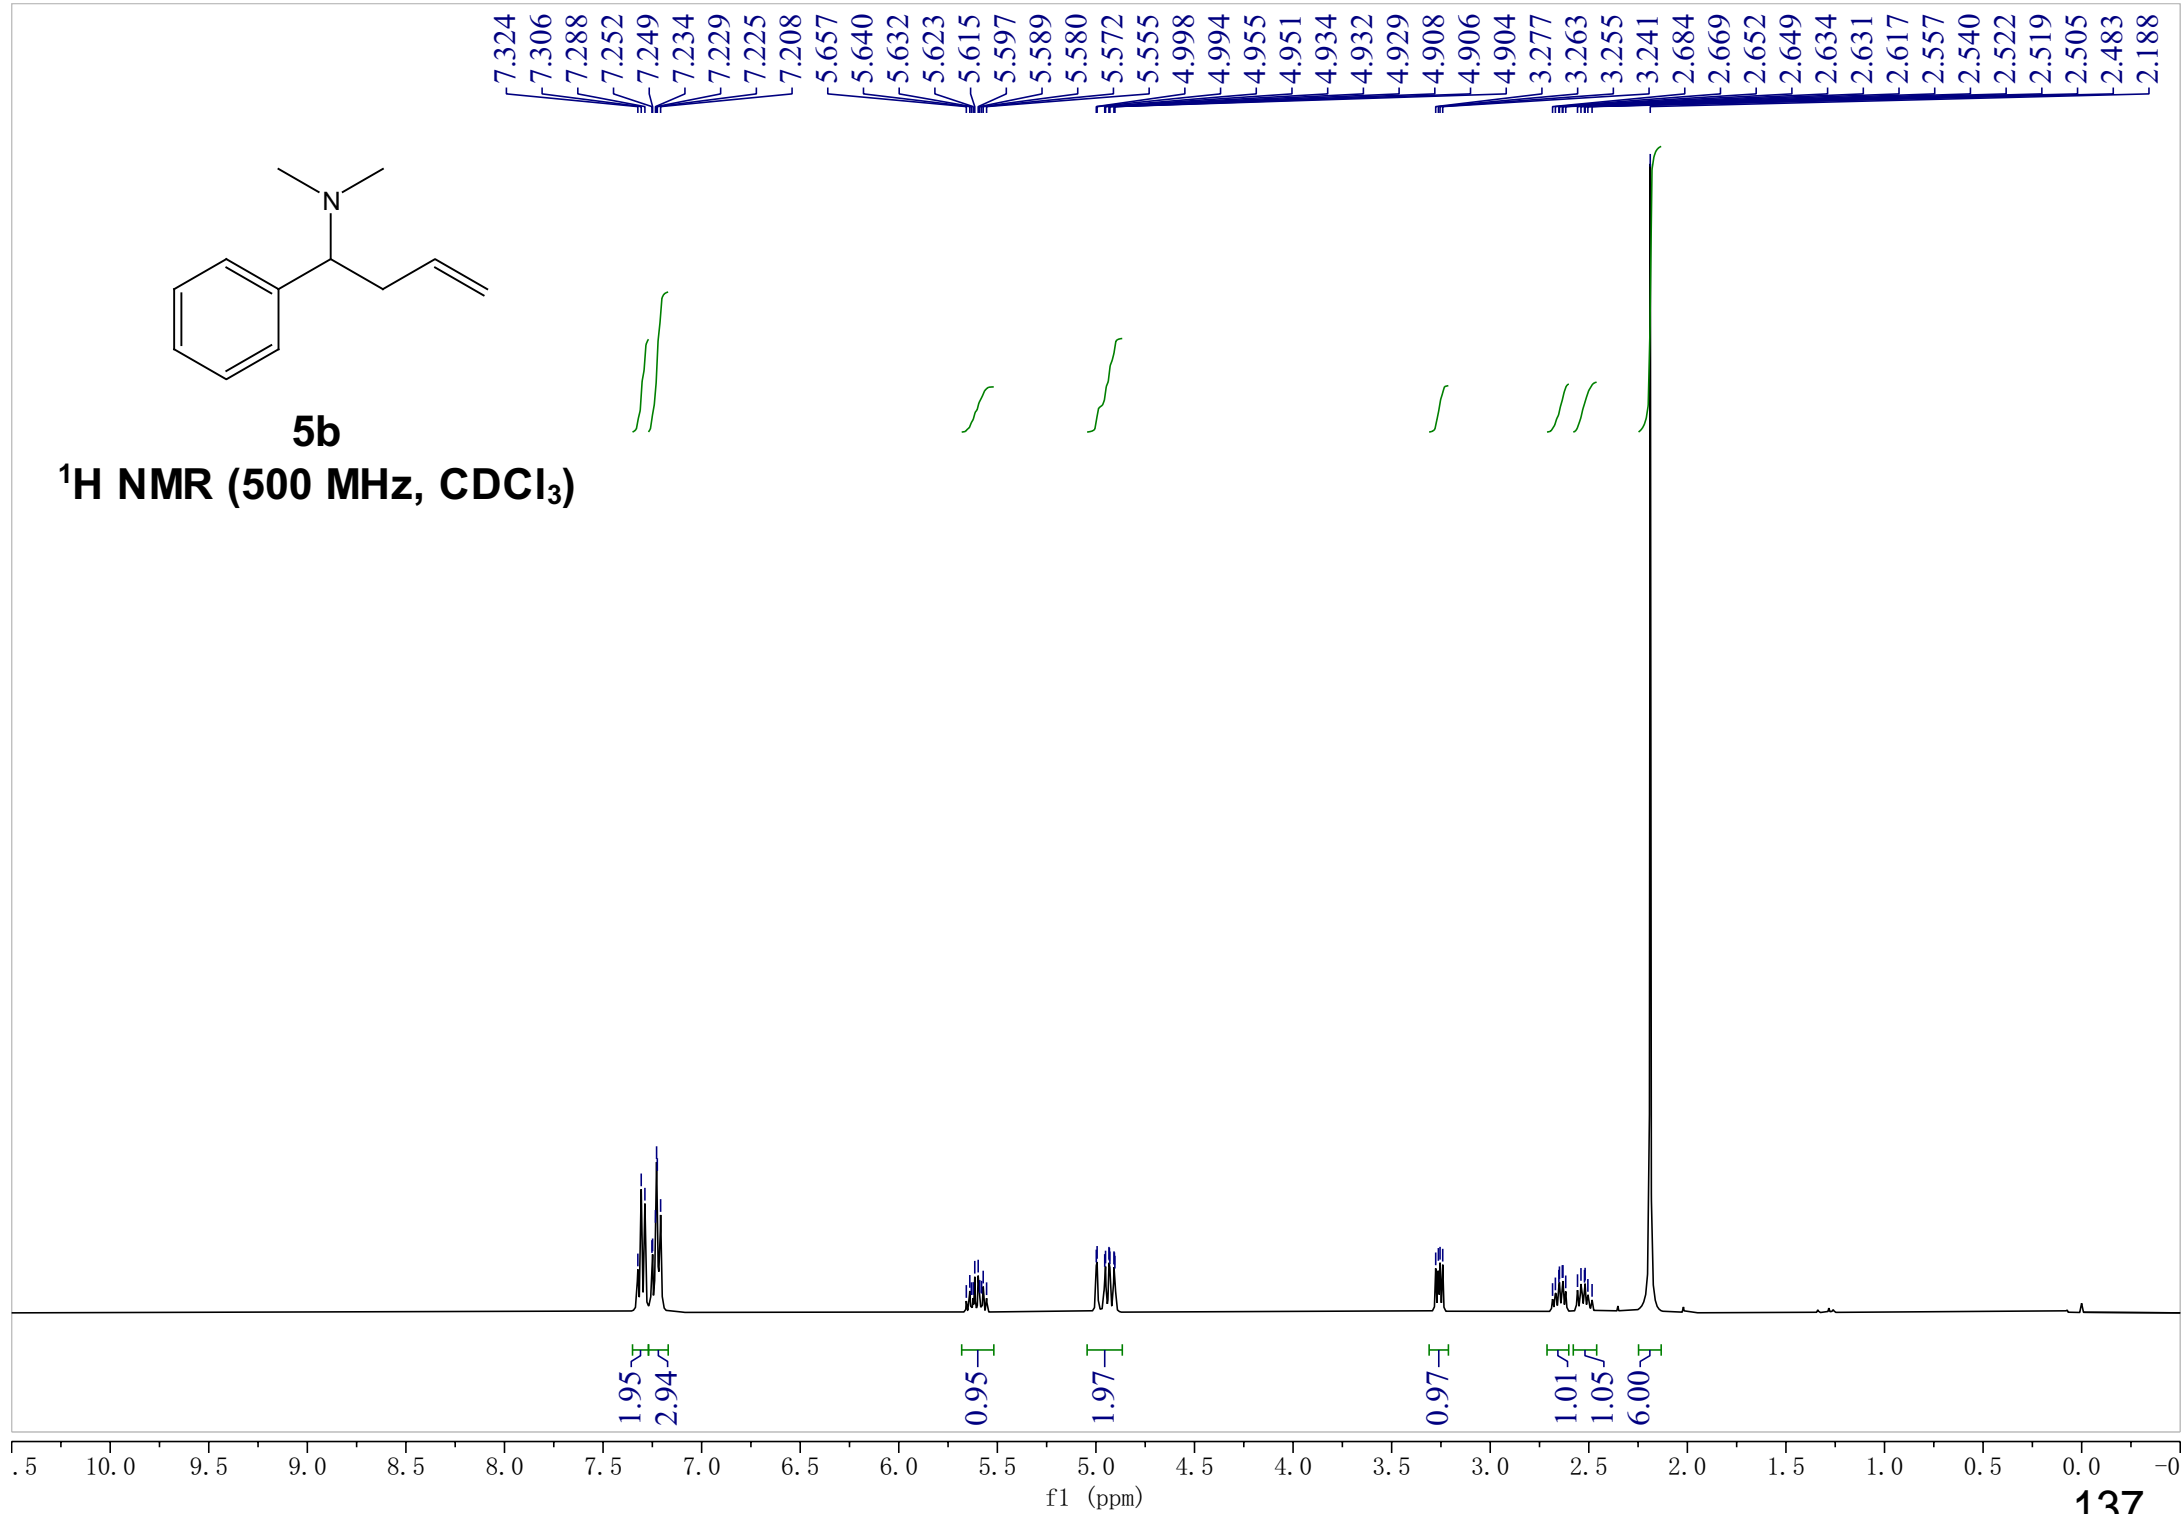



**5b**

**<sup>13</sup>C NMR (125 MHz, CDCl<sub>3</sub>)**

140.172  
135.805  
128.706  
128.062  
127.151

116.484

77.478  
77.160  
76.842  
70.713

42.849  
37.917

200 190 180 170 160 150 140 130 120 110 100 90 80 70 60 50 40 30 20 10 0 -10

f1 (ppm)

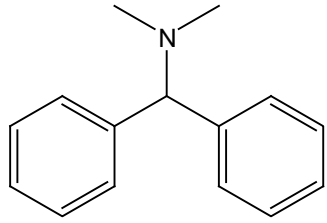

5c

<sup>1</sup>H NMR (500 MHz, CDCl<sub>3</sub>)

7.438  
7.422  
7.286  
7.271  
7.260  
7.256  
7.188  
7.174  
7.158

4.066

2.204

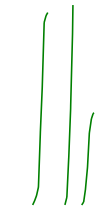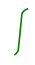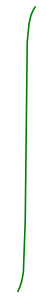

4.15

4.31

1.99

1.00

6.16

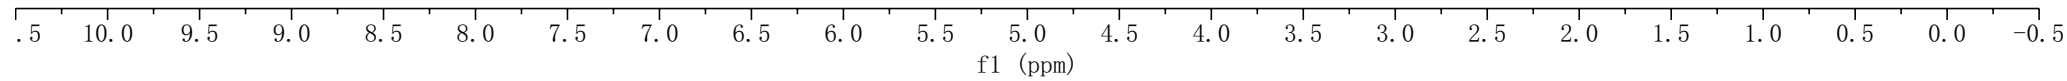



5c

<sup>13</sup>C NMR (125 MHz, CDCl<sub>3</sub>)

— 143.588  
— 128.591 — 127.884 — 127.020  
— 78.198 — 77.414 — 77.161 — 76.906  
— 44.896

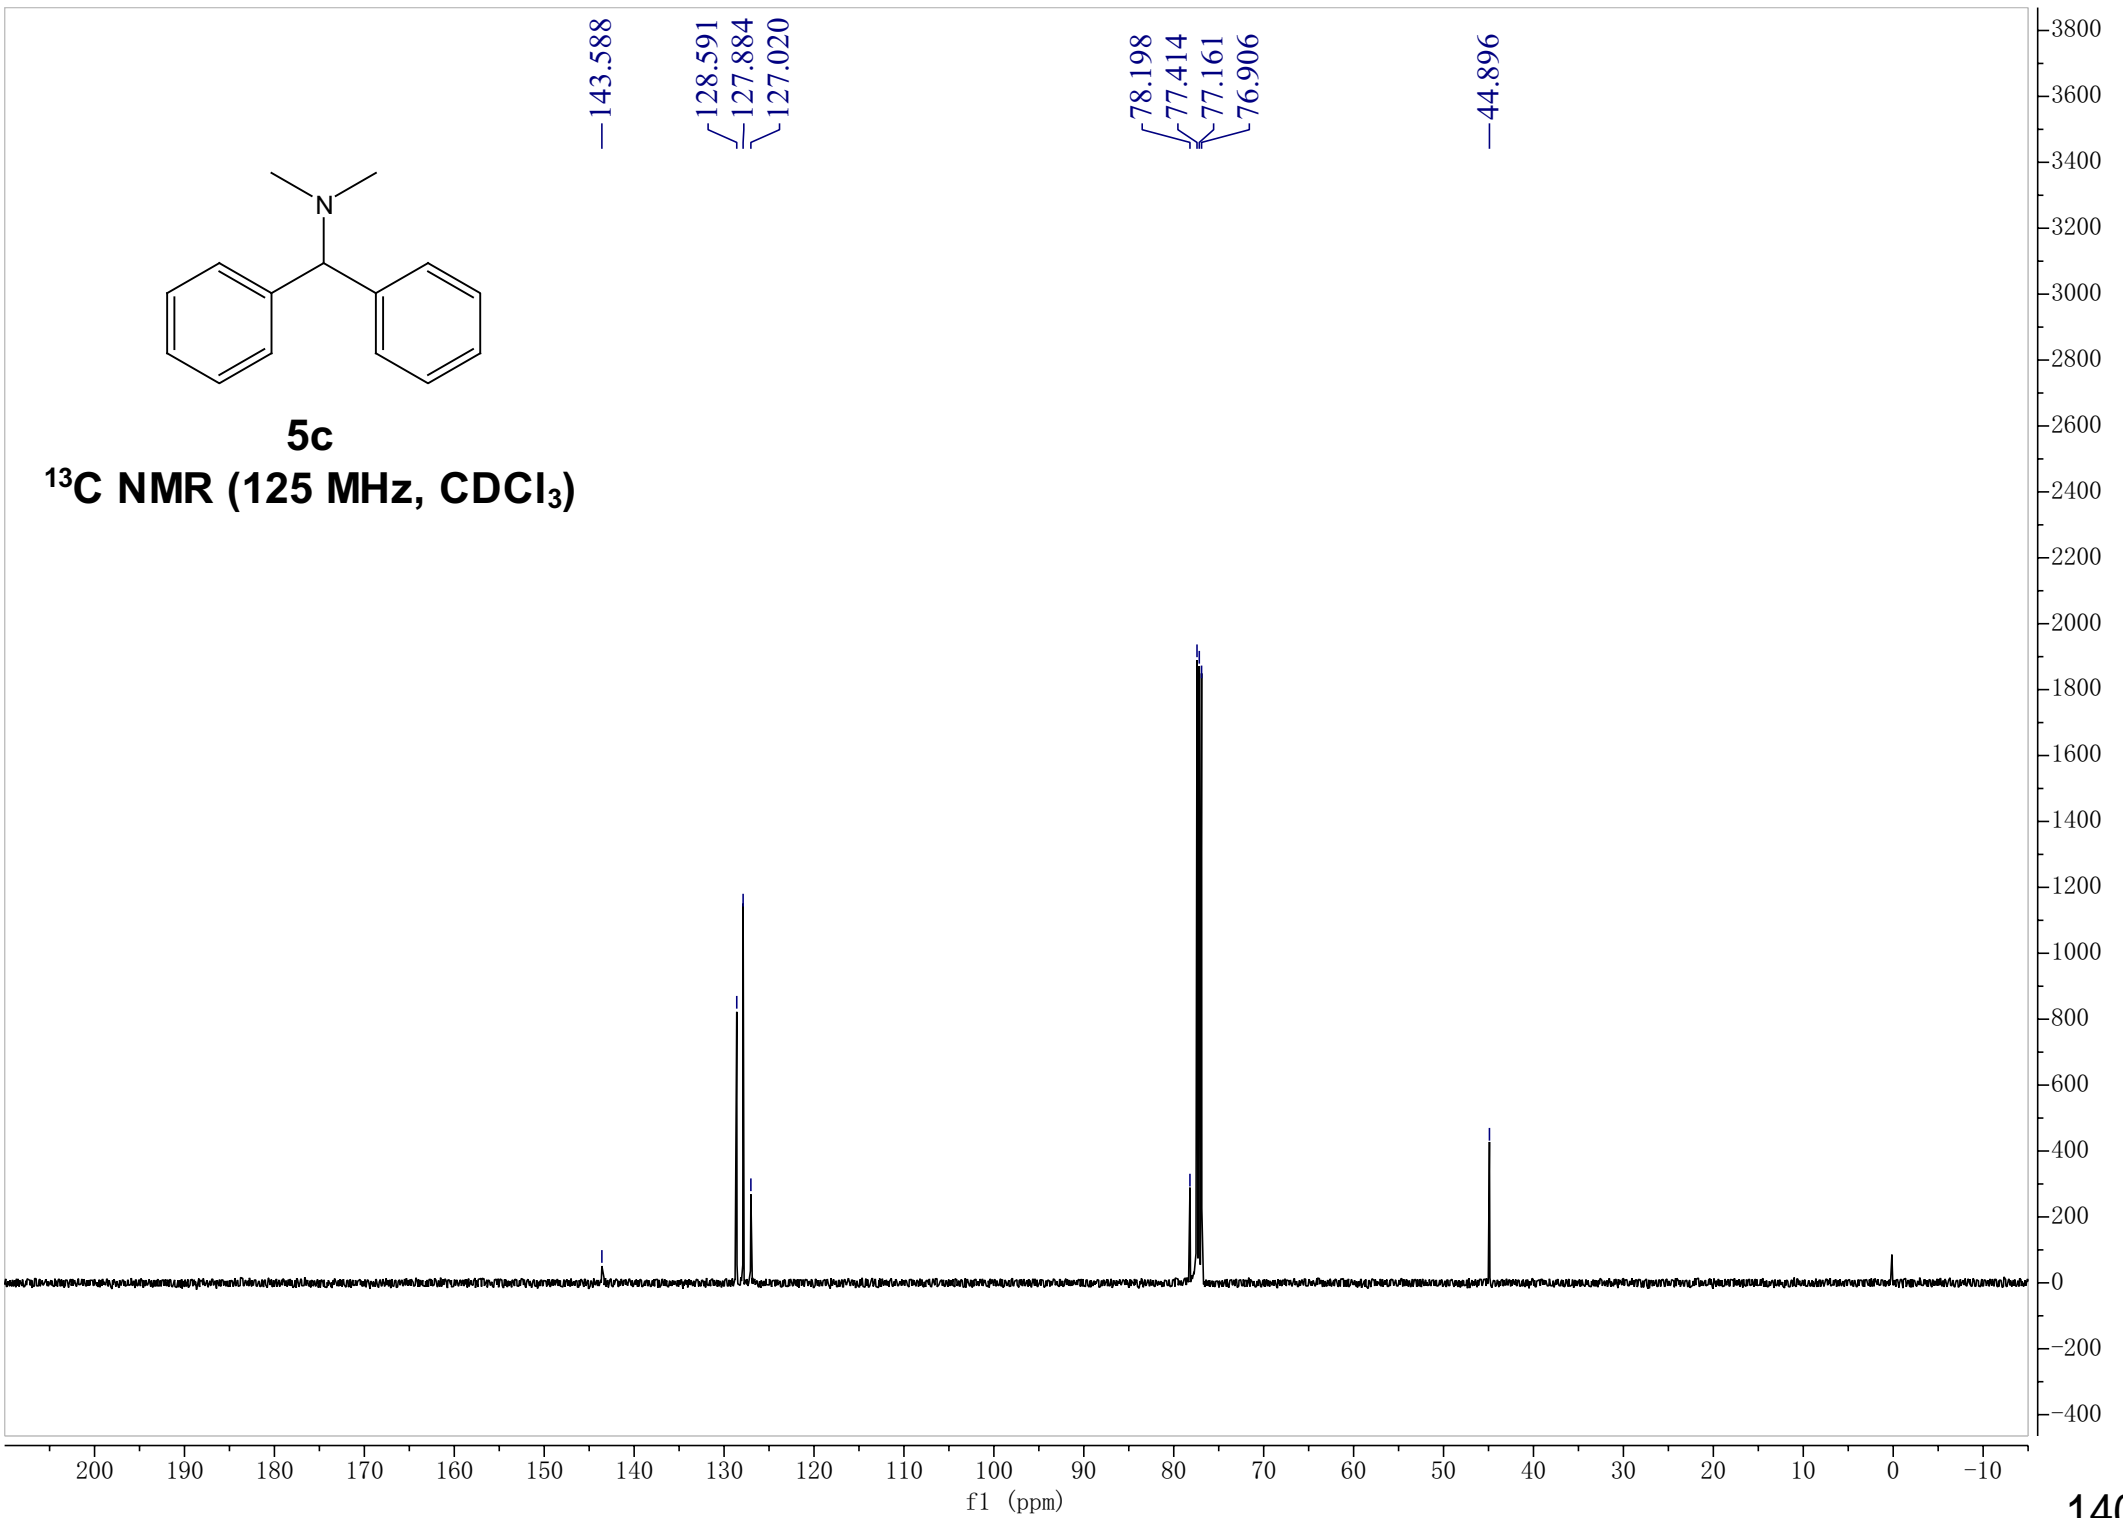

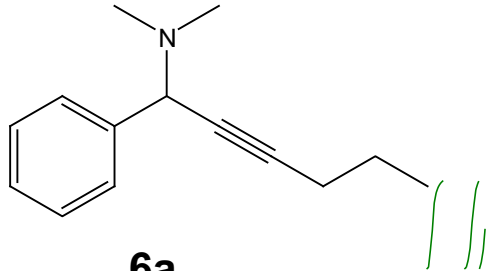

6a

<sup>1</sup>H NMR (500 MHz, CDCl<sub>3</sub>)

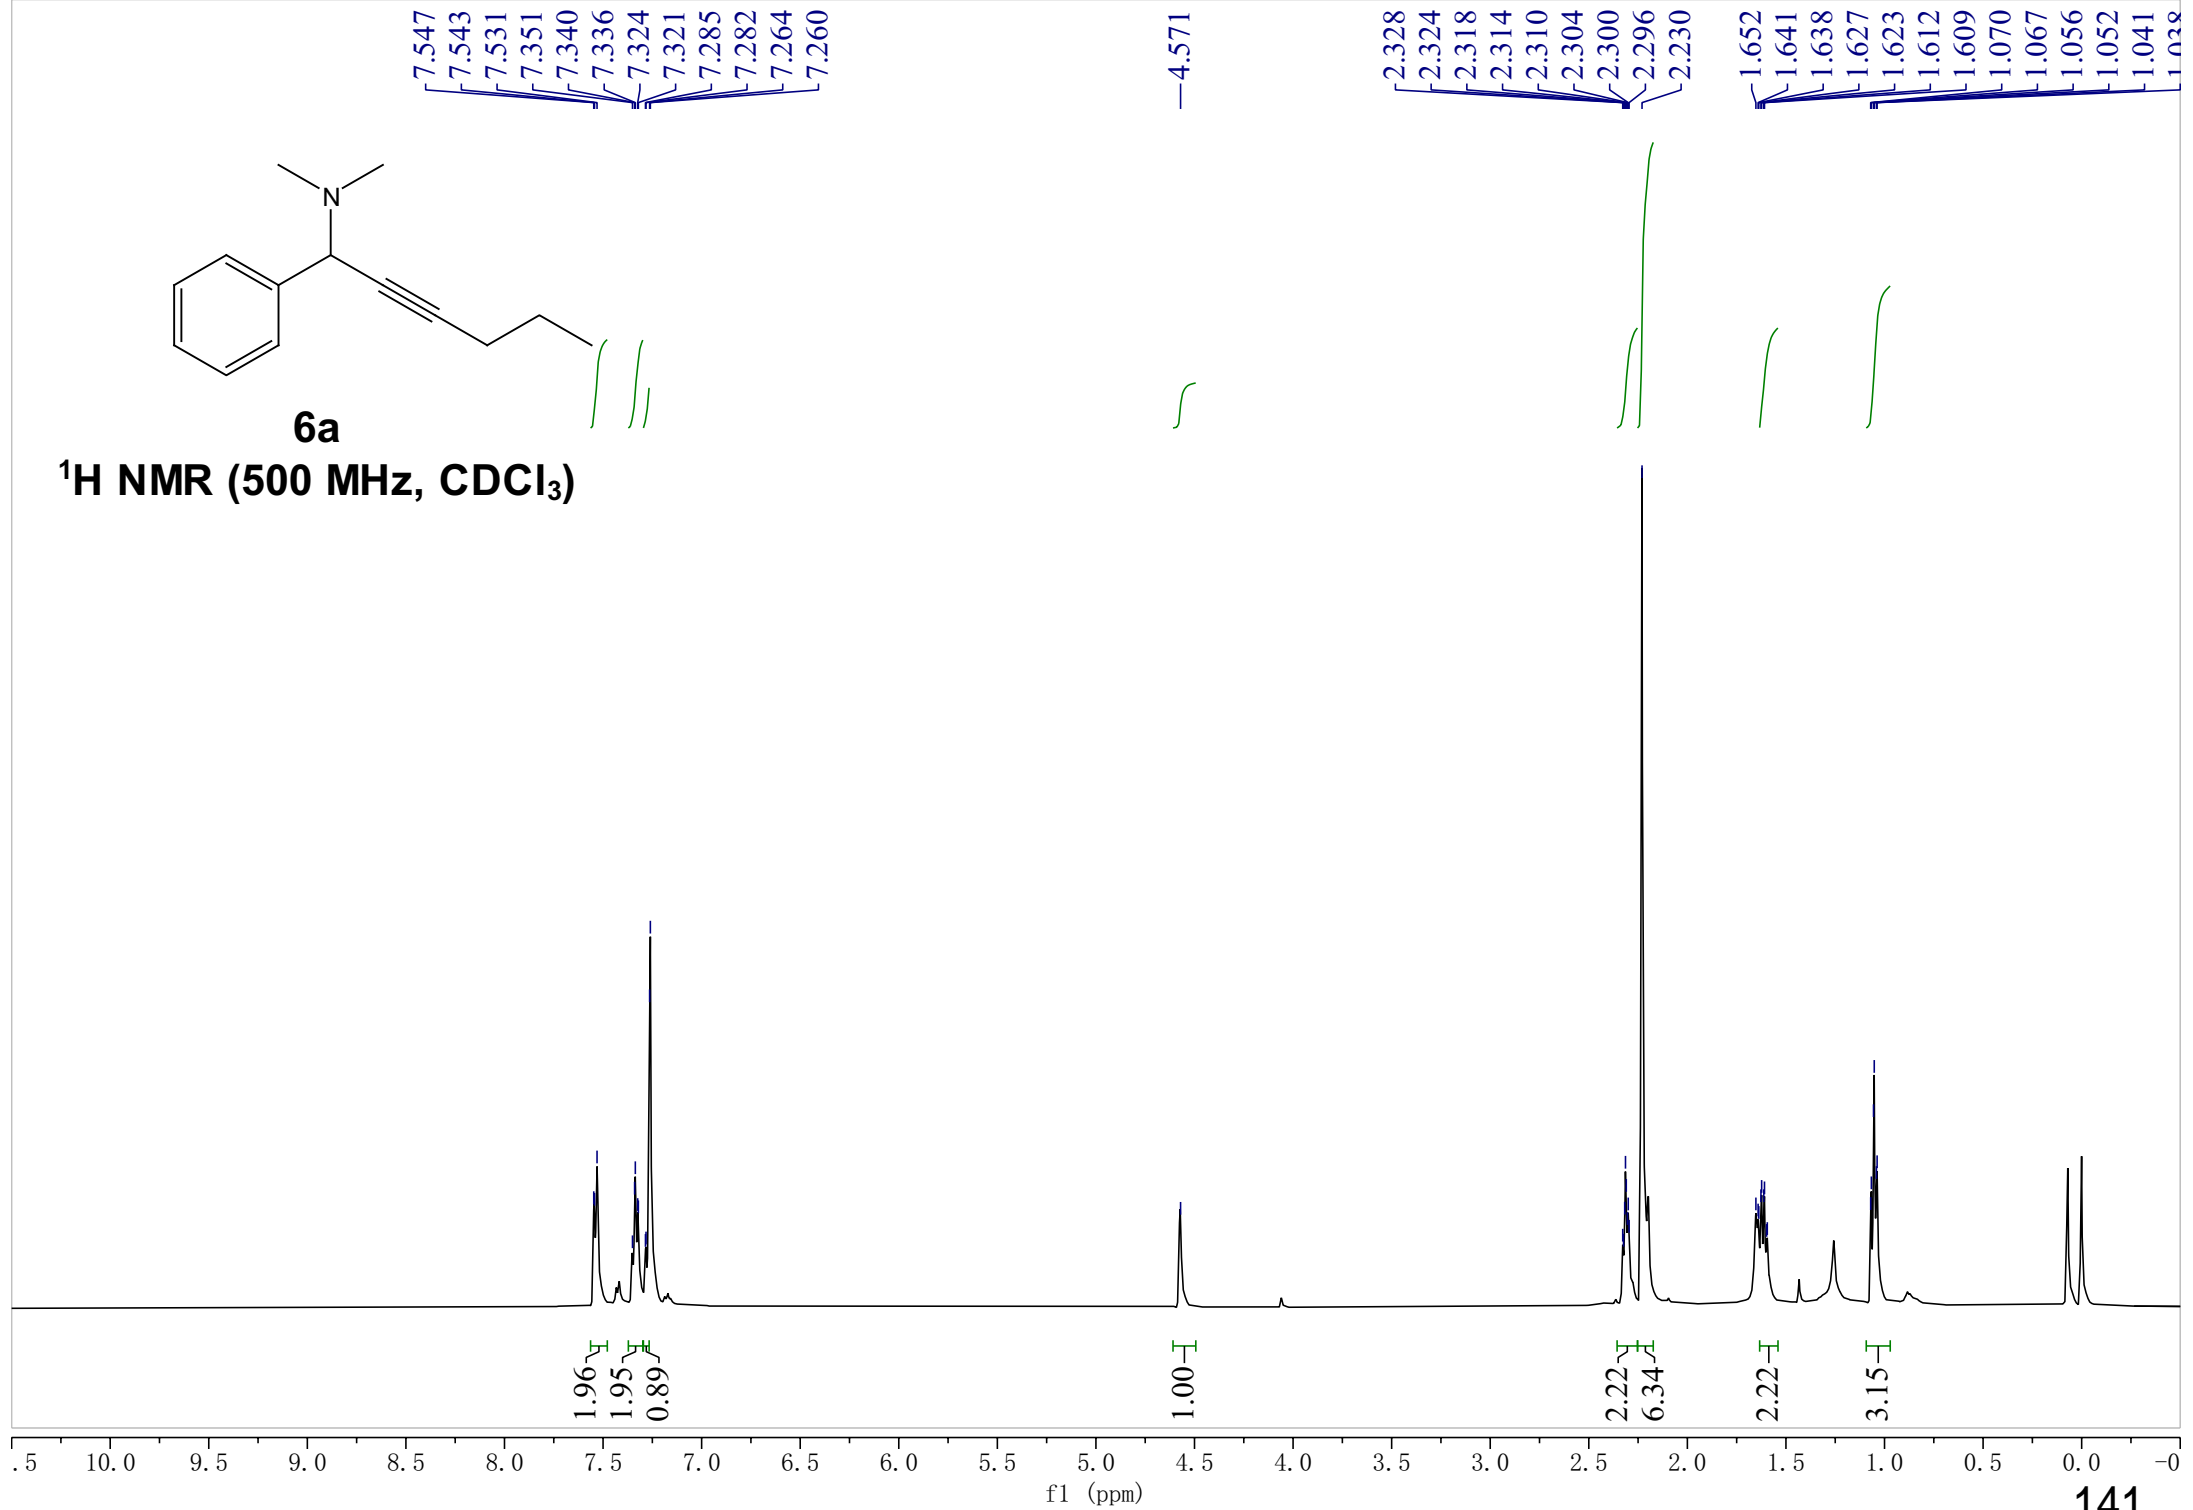

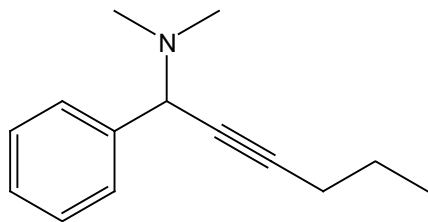

6a

<sup>13</sup>C NMR (125 MHz, CDCl<sub>3</sub>)

—139.383

128.579

128.160

127.539

—88.519

77.413

77.159

76.905

75.152

—61.935

—41.582

~22.657

~20.926

~13.732

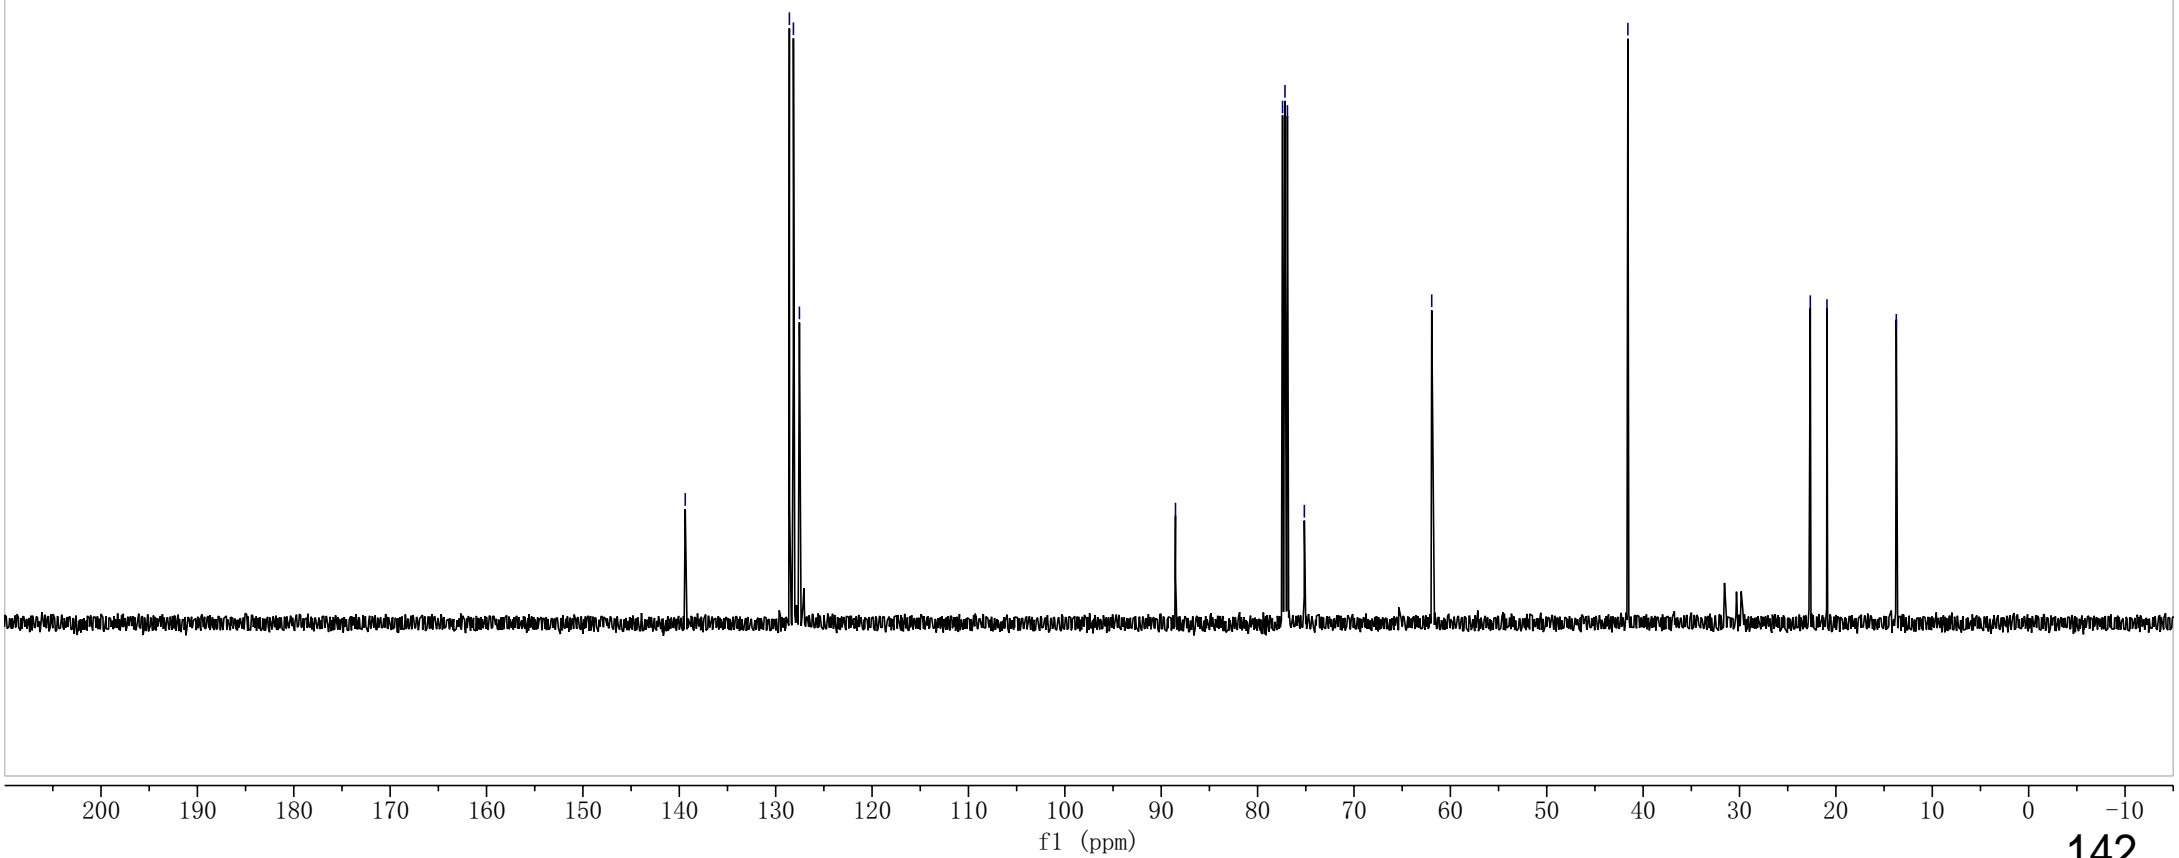

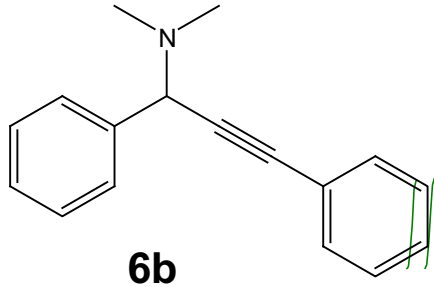

**<sup>1</sup>H NMR (500 MHz, CDCl<sub>3</sub>)**

7.645  
7.633  
7.630  
7.558  
7.549  
7.543  
7.538  
7.406  
7.392  
7.376  
7.358  
7.355  
7.349  
7.344  
7.337  
7.322  
7.308

4.855

2.350

1.95  
2.00  
6.25  
1.00  
6.01

f1 (ppm)



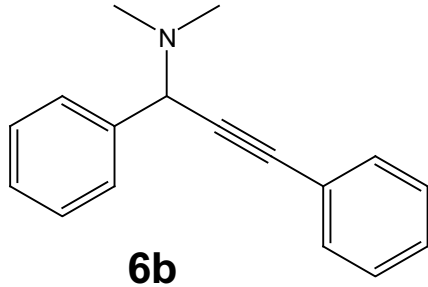

138.751  
131.934  
128.604  
128.427  
128.324  
128.282  
127.799  
123.281

88.505  
84.859  
77.413  
77.160  
76.906

62.323

41.707

**<sup>13</sup>C NMR (125 MHz, CDCl<sub>3</sub>)**

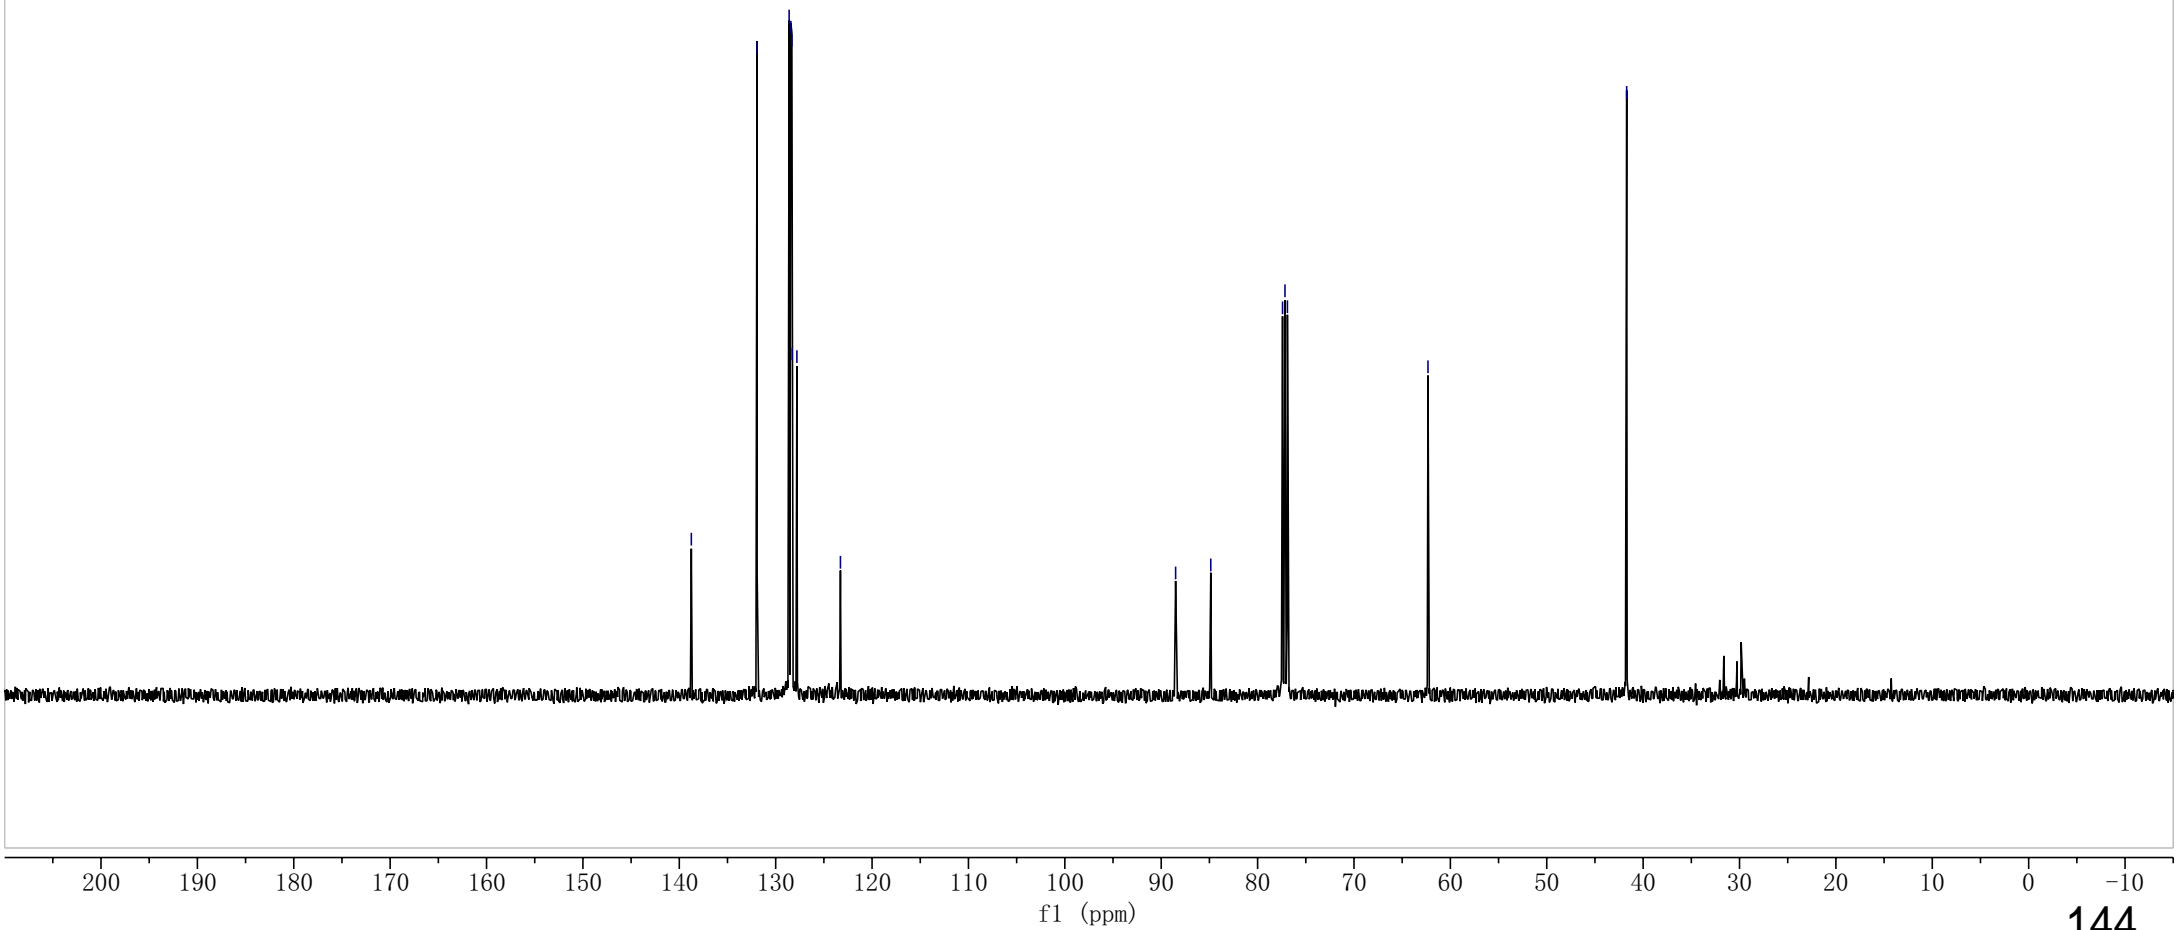

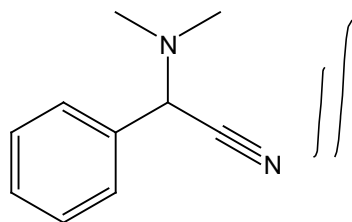

**7a**

**<sup>1</sup>H NMR (400 MHz, CDCl<sub>3</sub>)**

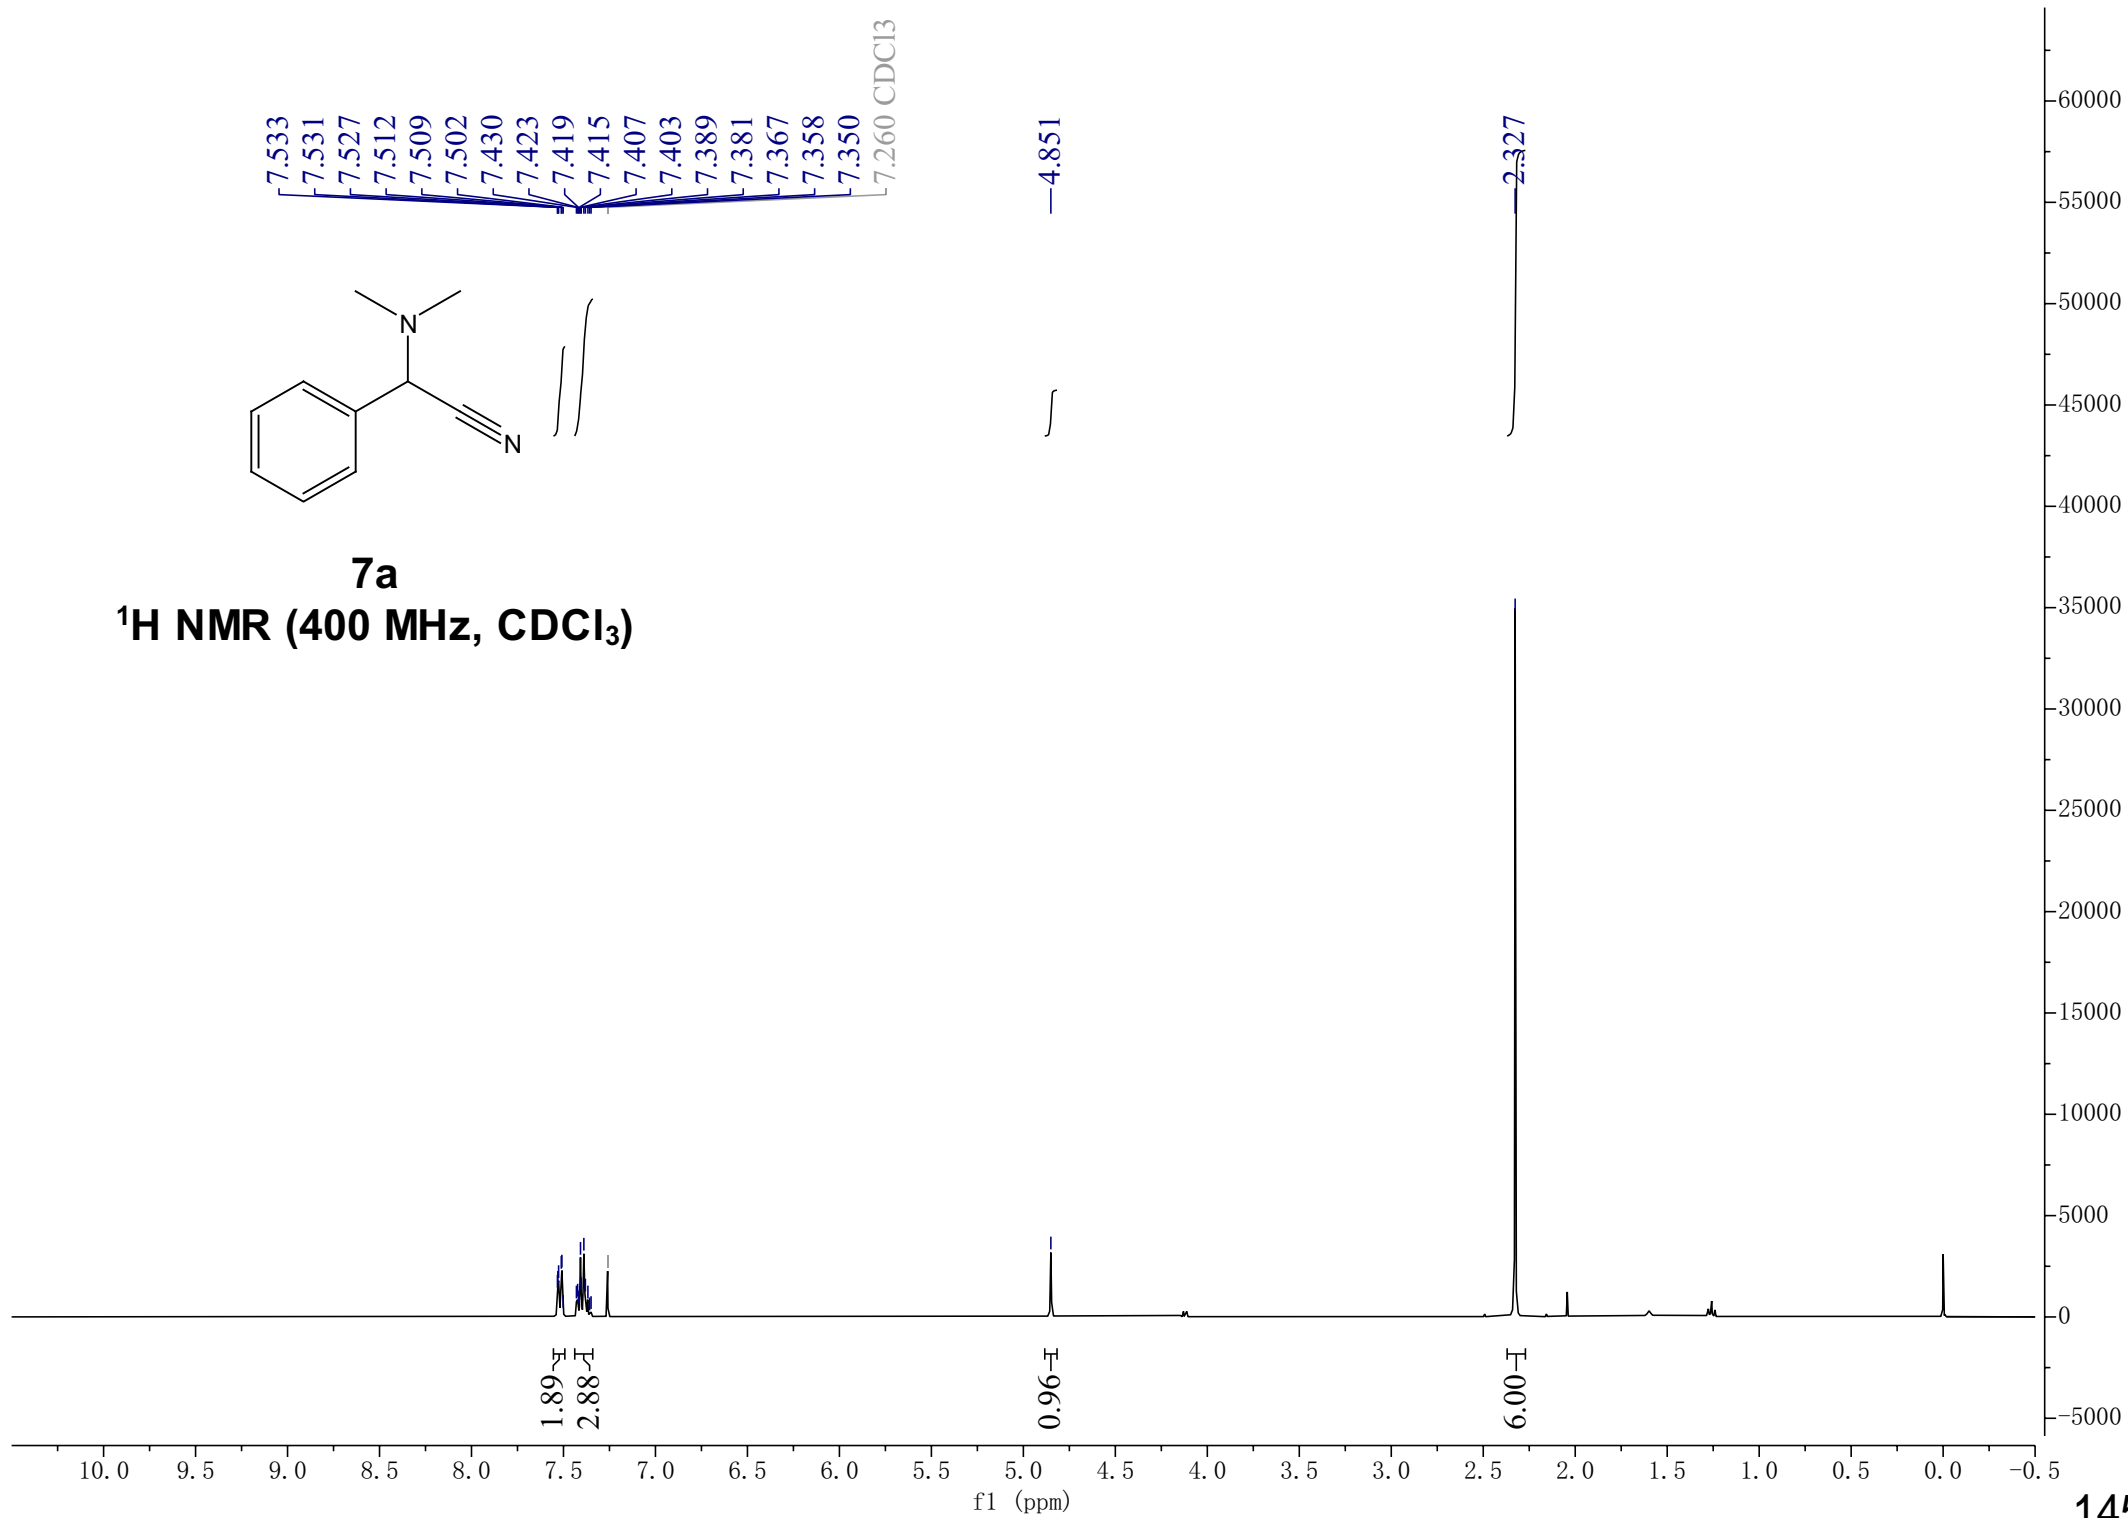

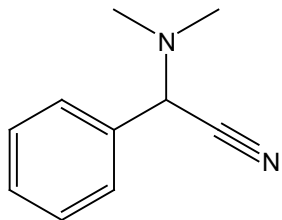

**7a**

**<sup>13</sup>C NMR (100 MHz, CDCl<sub>3</sub>)**

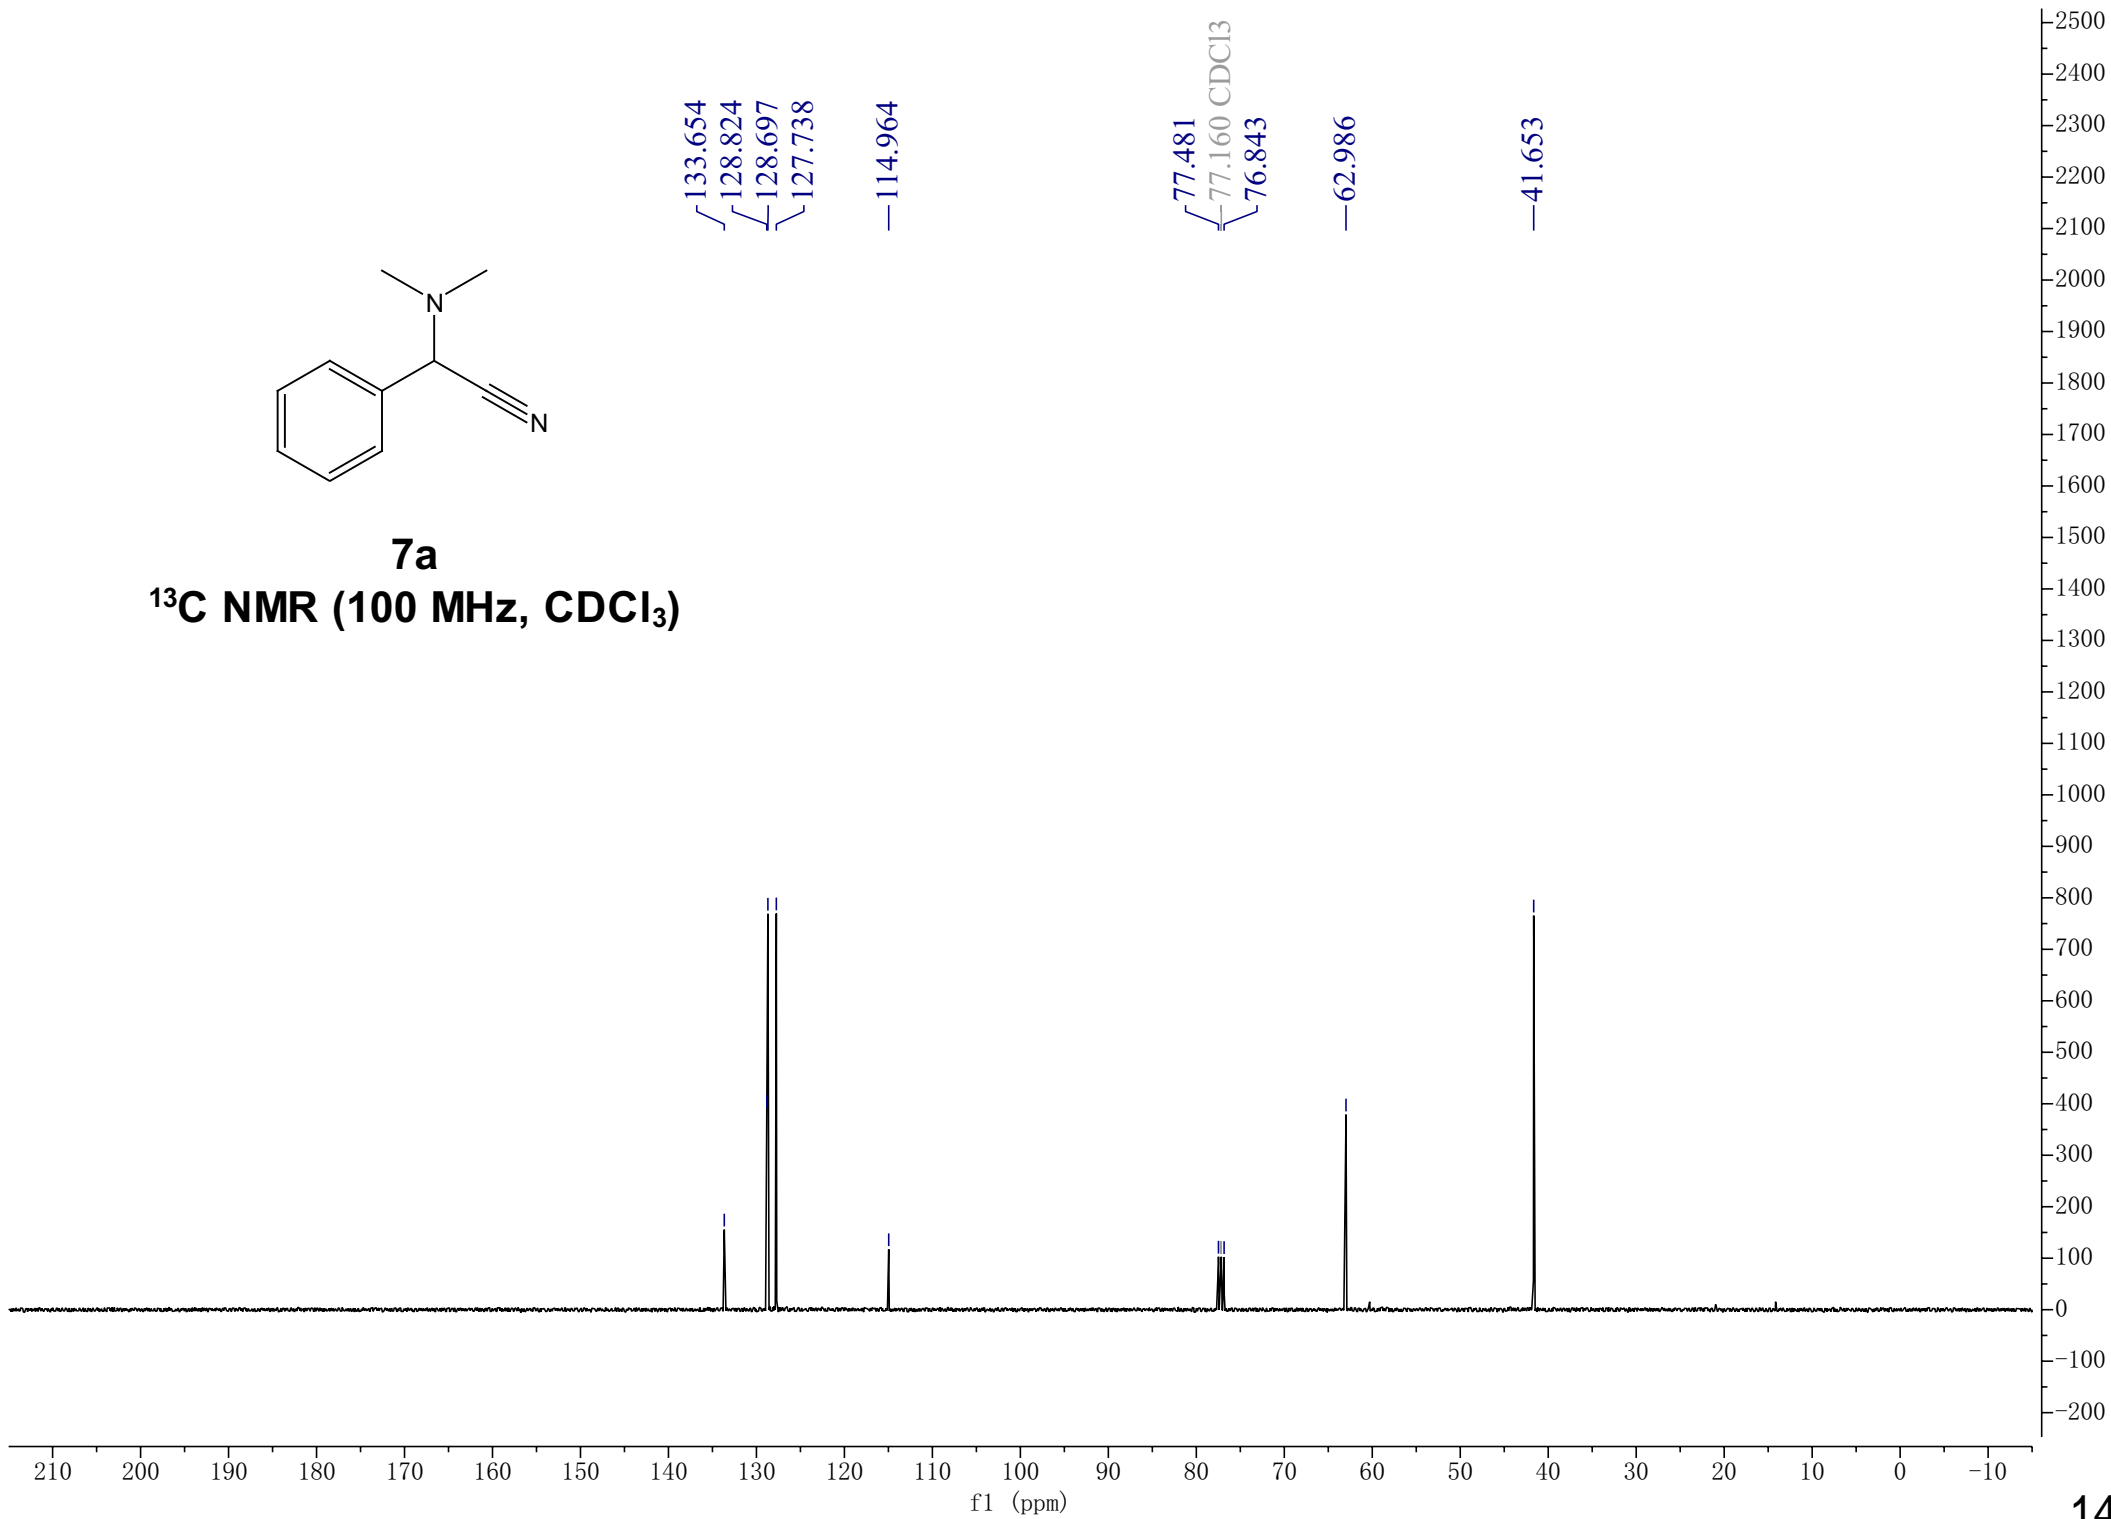

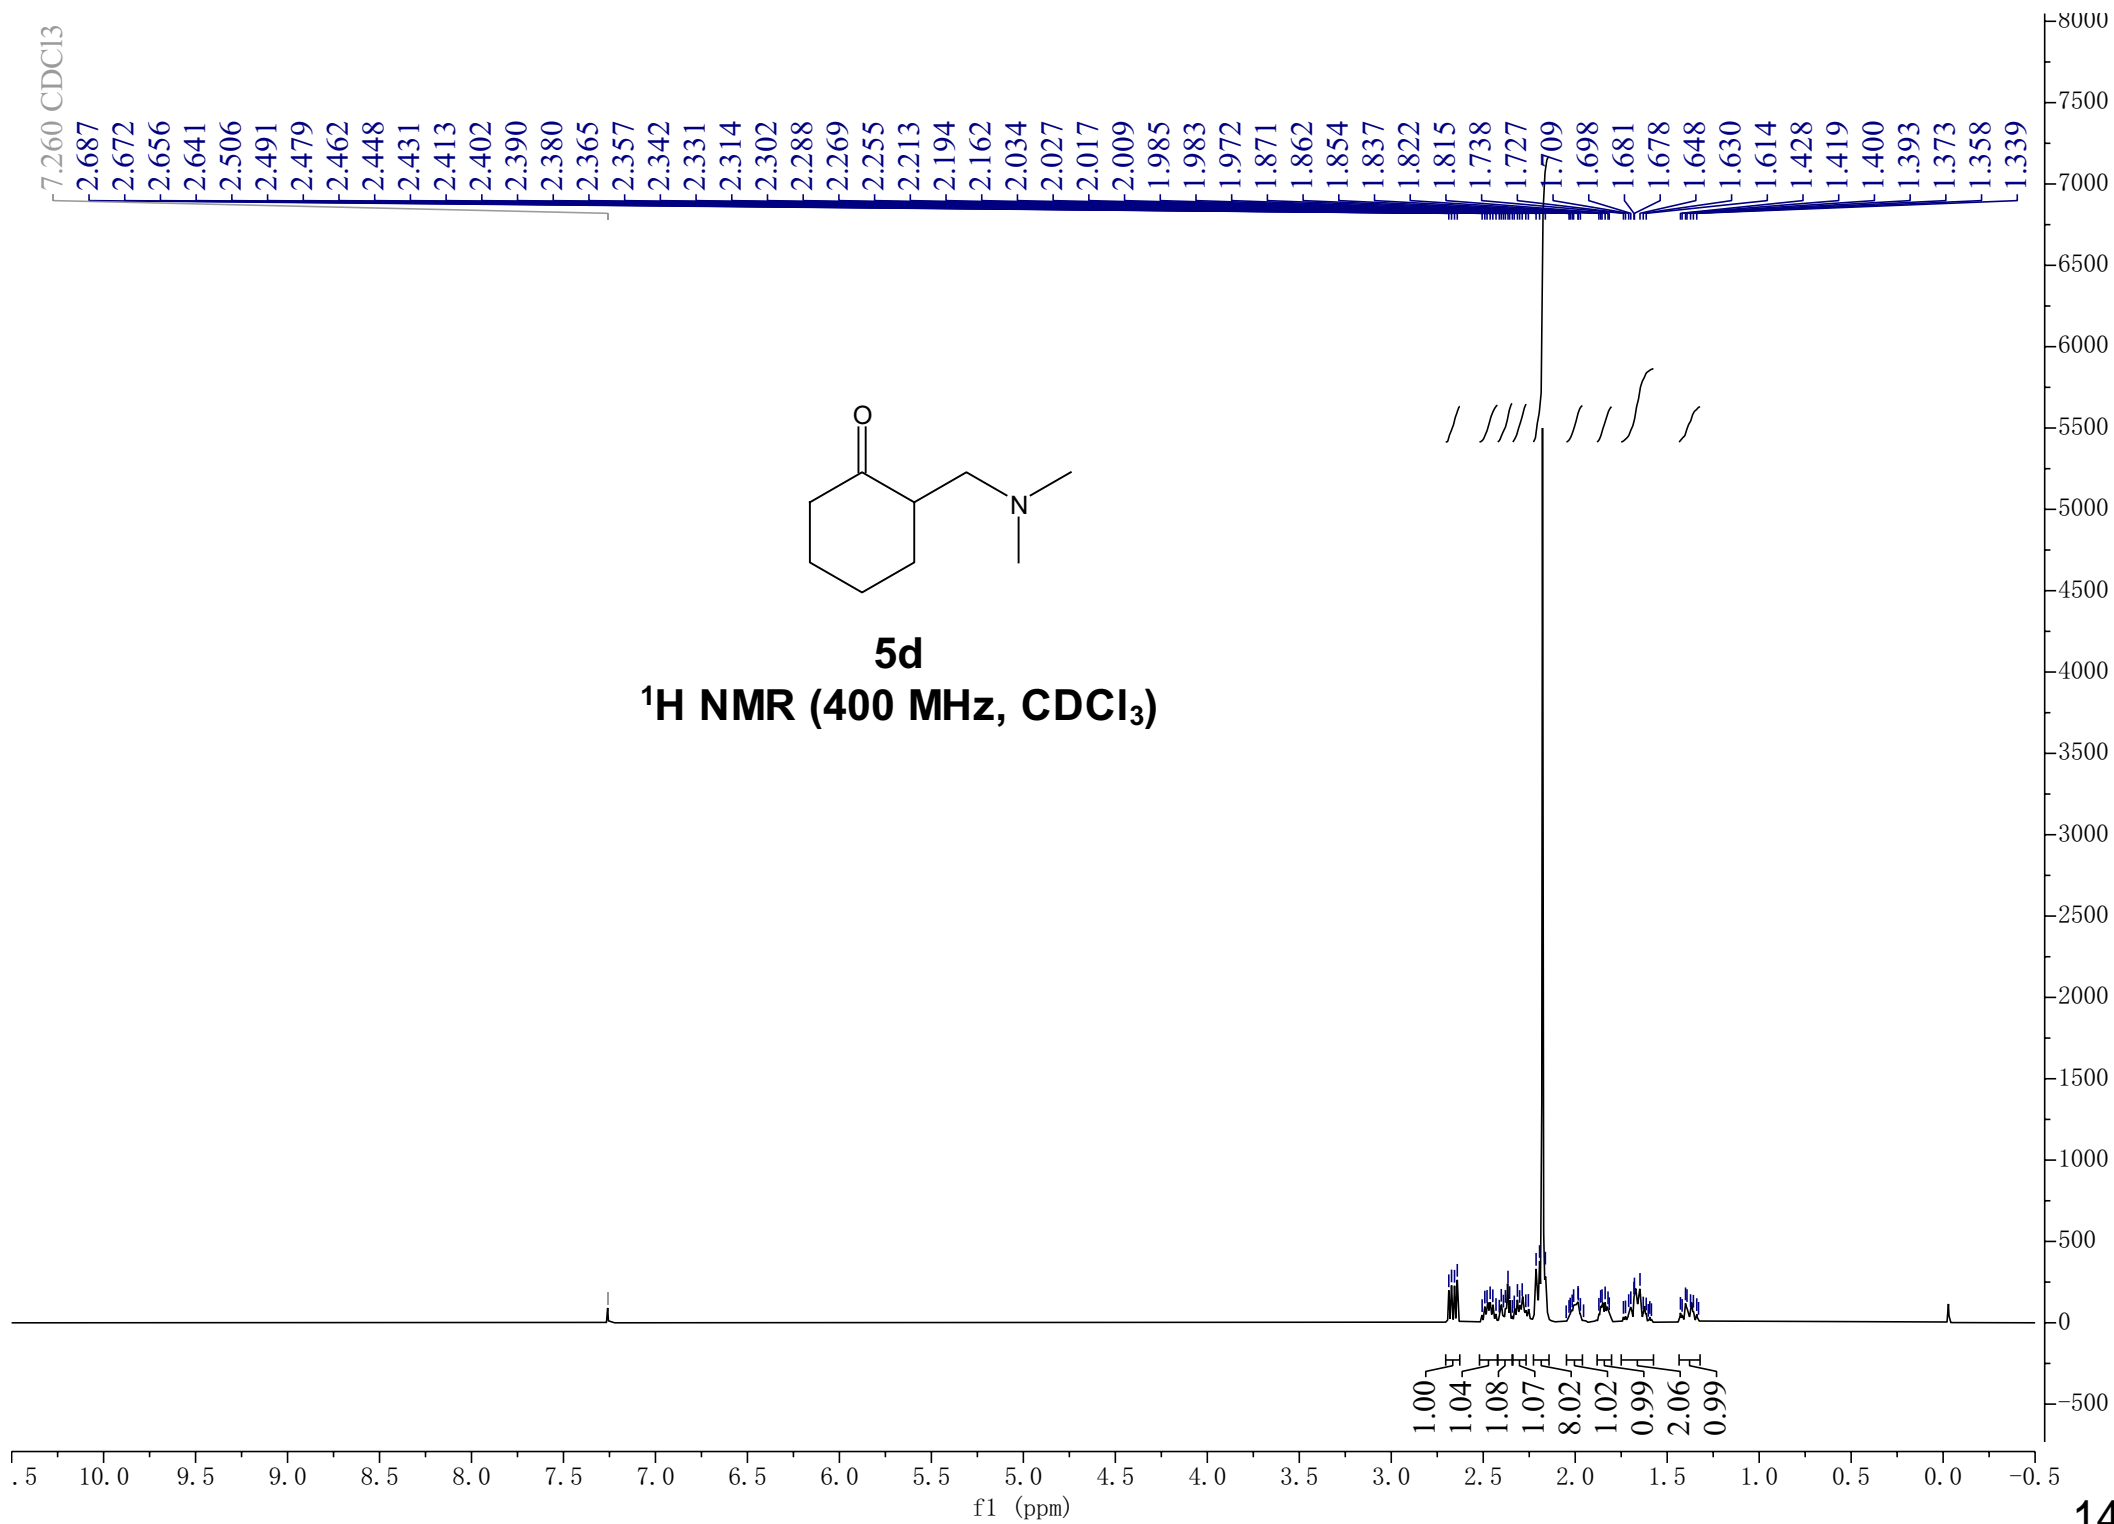

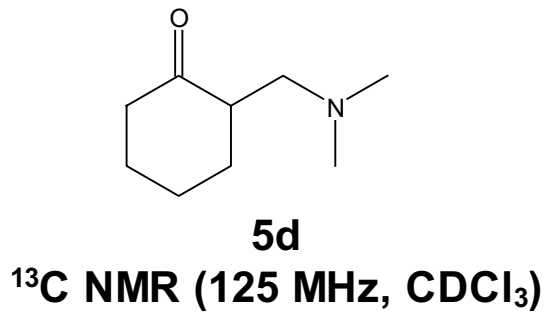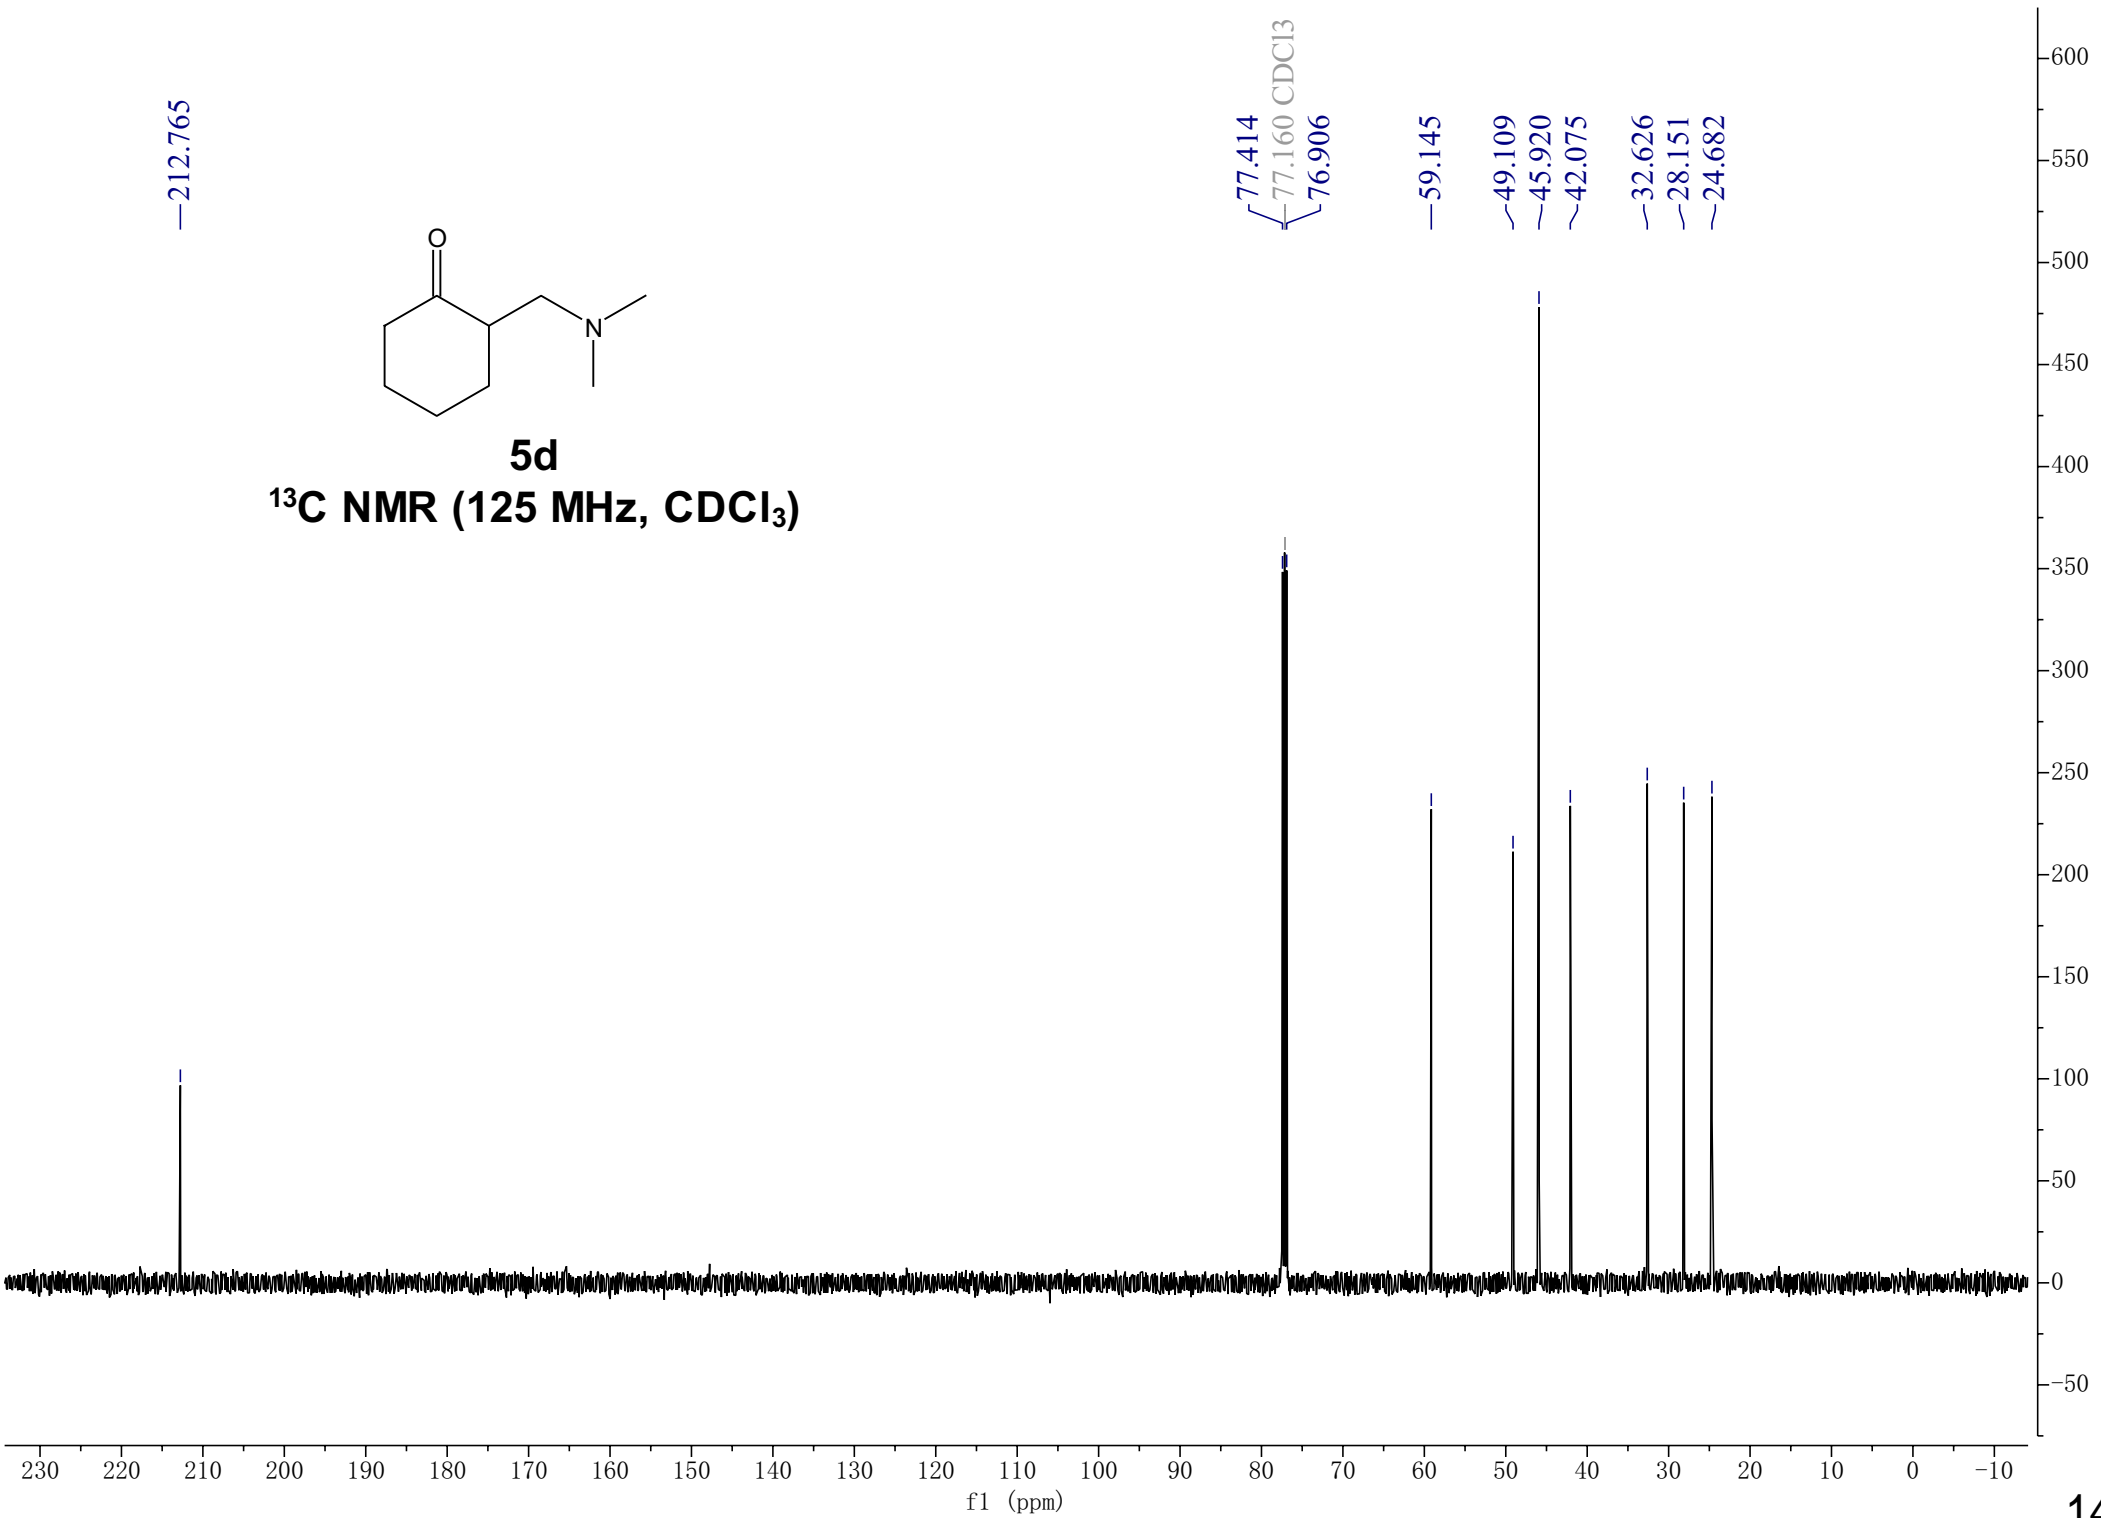

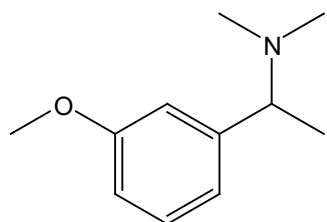

**5e**

**<sup>1</sup>H NMR (400 MHz, CDCl<sub>3</sub>)**

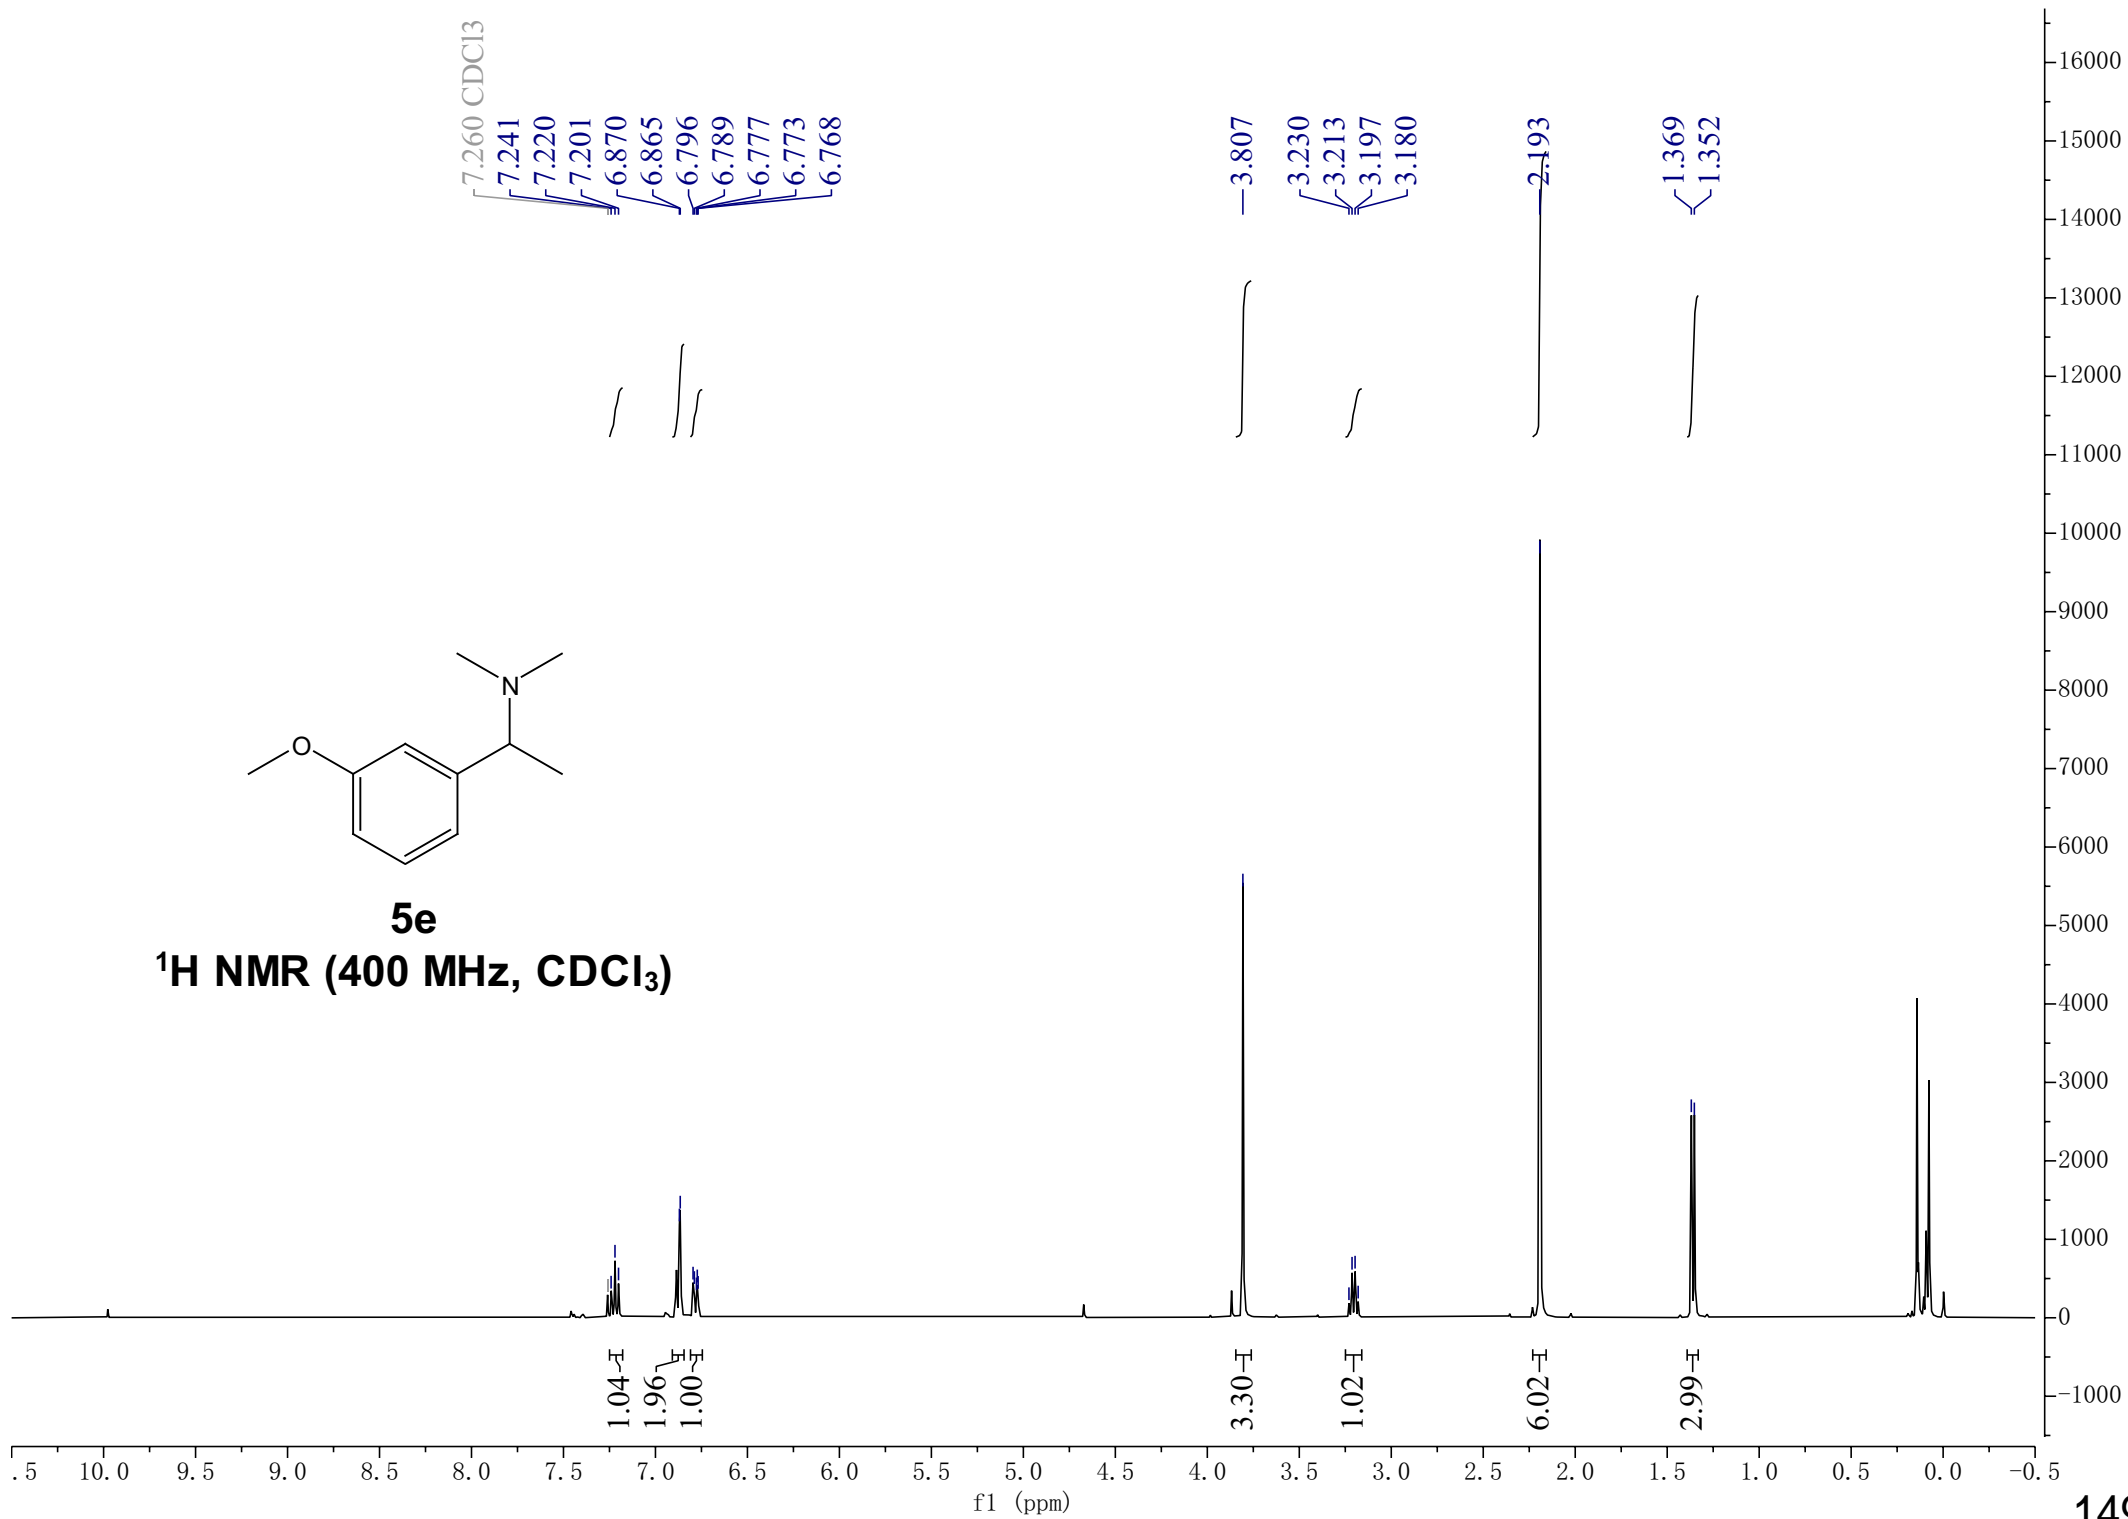

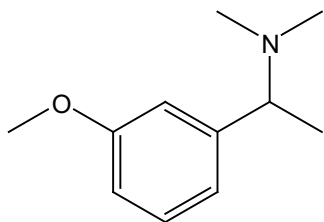

**5e**

**$^{13}\text{C}$  NMR (100 MHz,  $\text{CDCl}_3$ )**

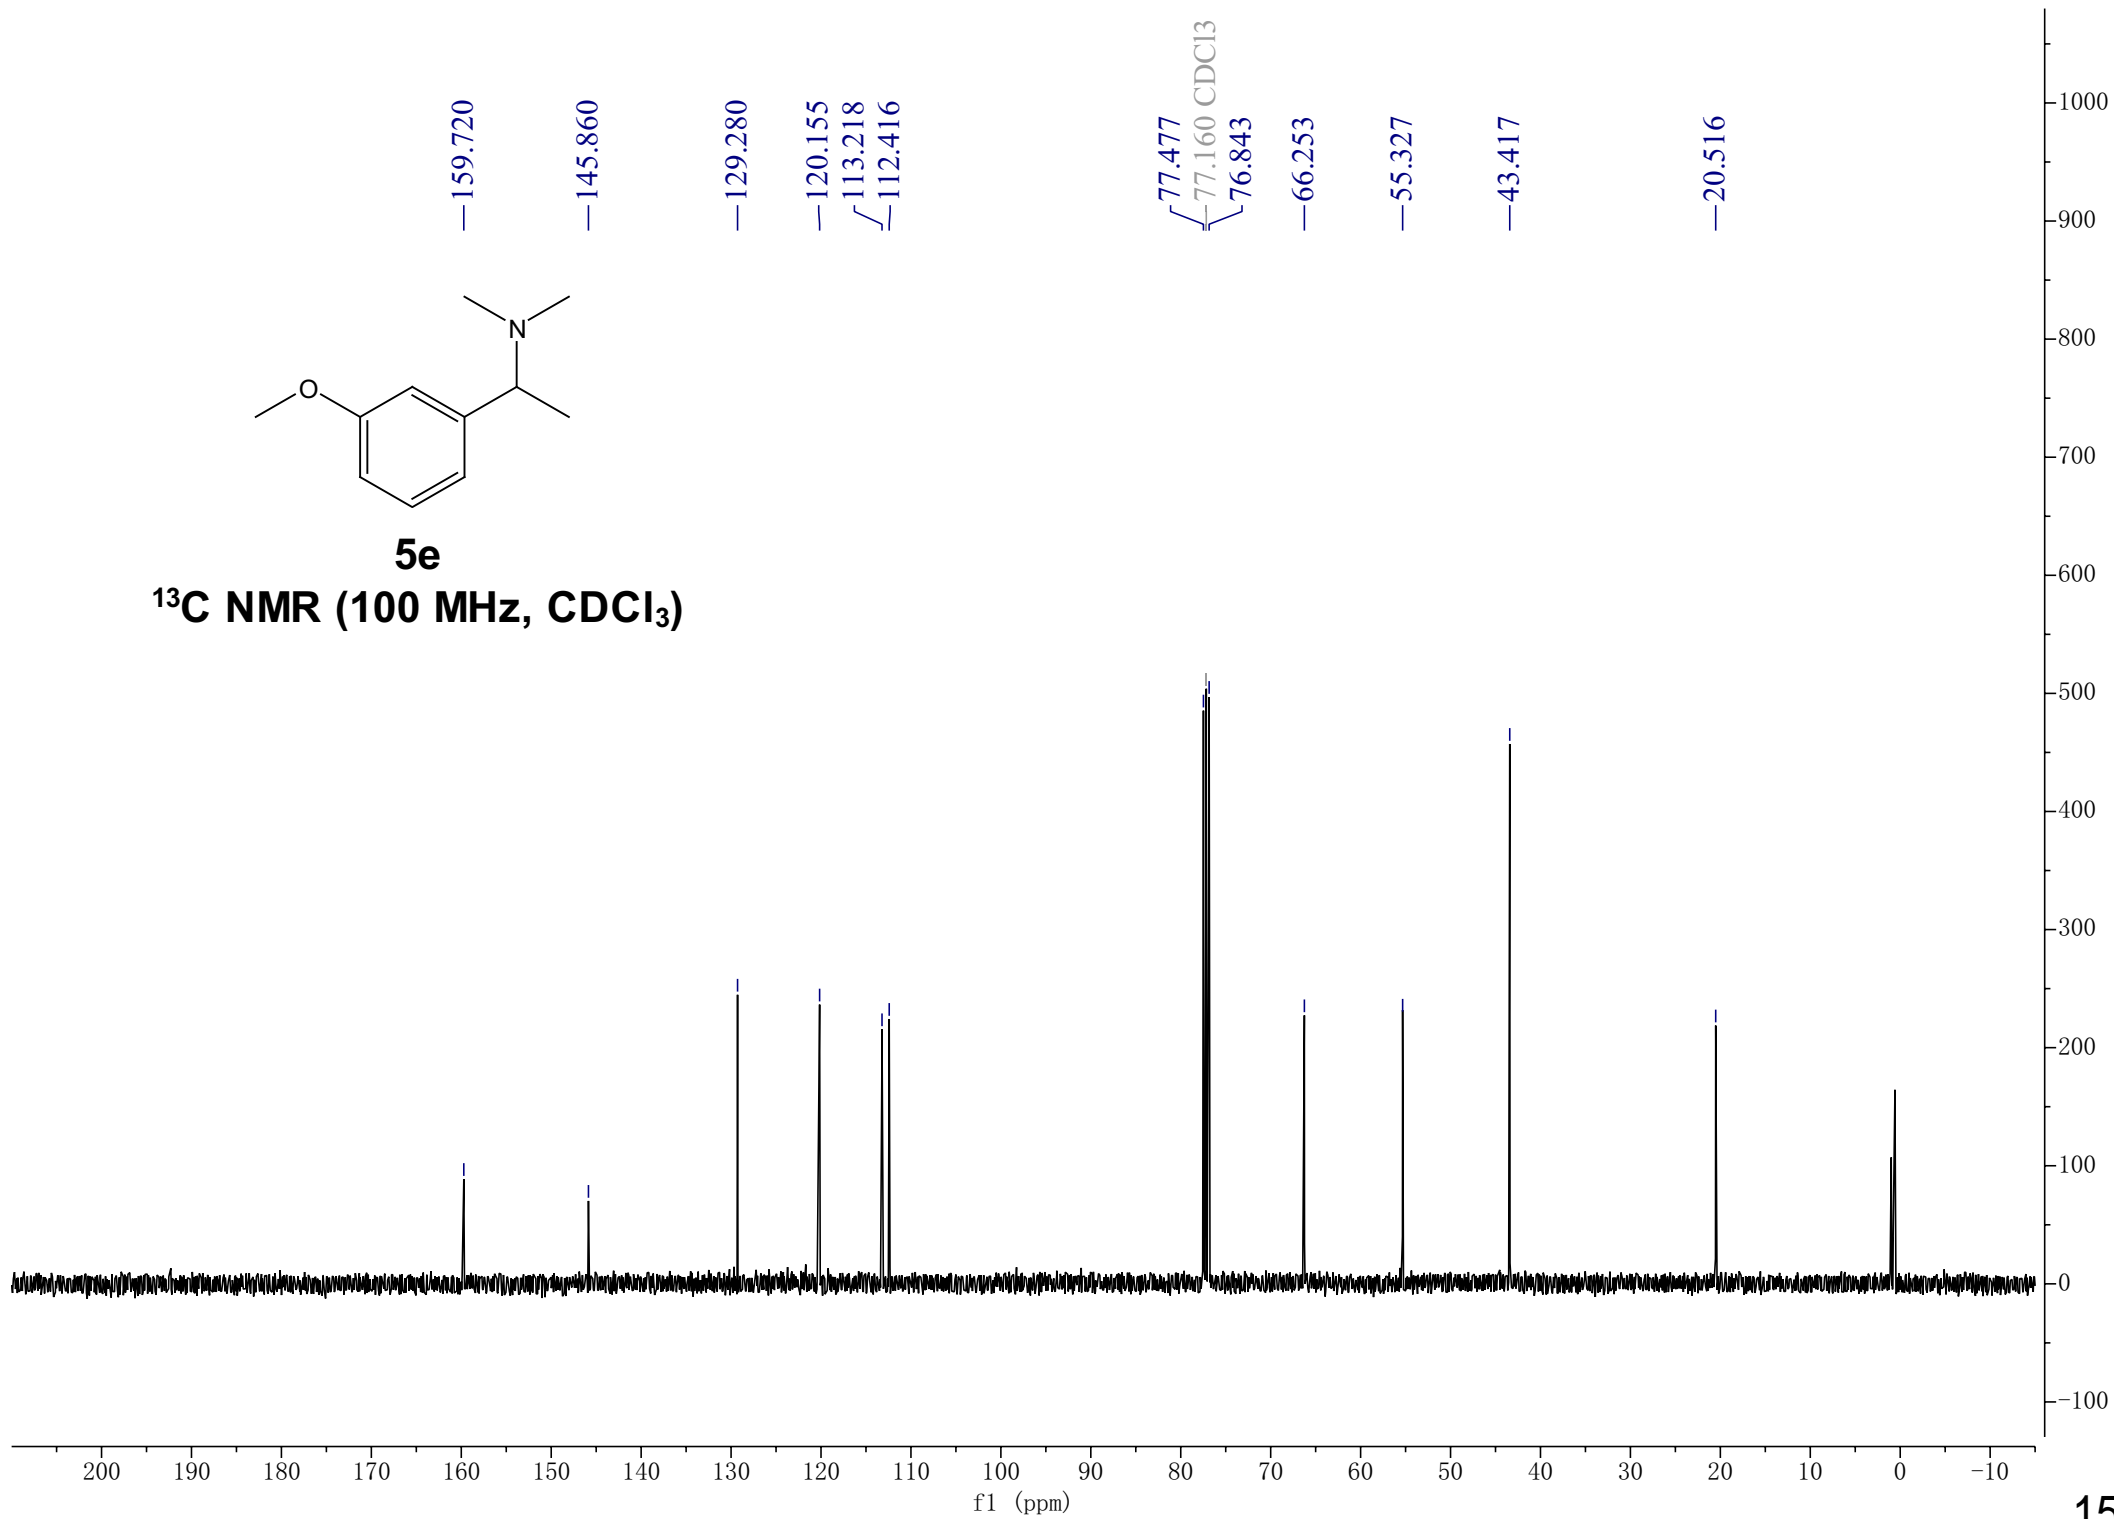

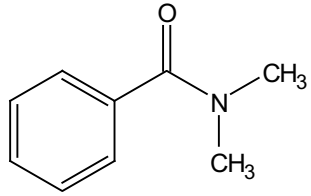

**1a**

**<sup>1</sup>H NMR (500 MHz, CDCl<sub>3</sub>)**

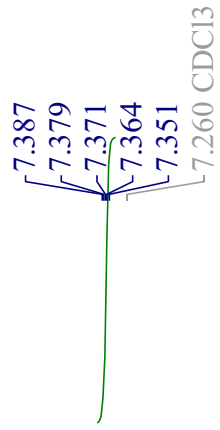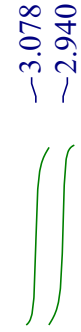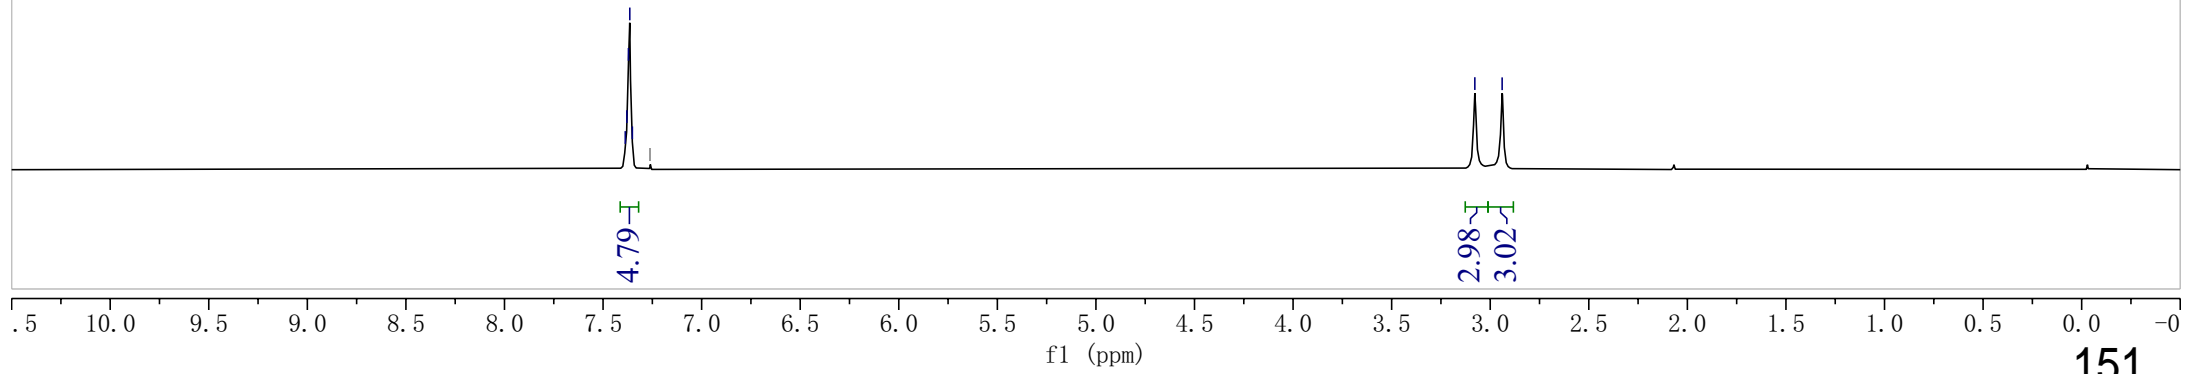



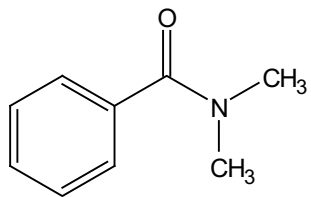

**1a**

**<sup>13</sup>C NMR (125 MHz, CDCl<sub>3</sub>)**

—171.634

~136.399

~129.515

~128.360

~127.057

~77.415

~77.161

~76.905

—39.594

—35.340

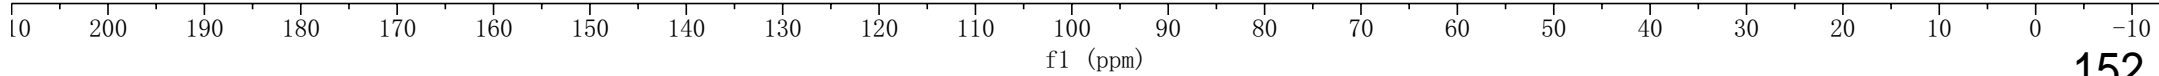

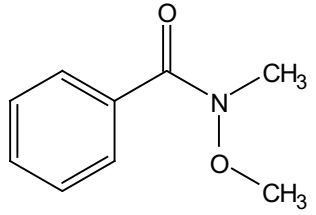

**1ff**

**<sup>1</sup>H NMR (500 MHz, CDCl<sub>3</sub>)**

7.611  
7.597  
7.393  
7.379  
7.364  
7.343  
7.327  
7.313  
7.260

3.476  
3.280

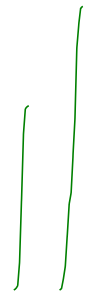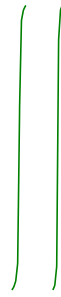

1.92  
2.96

2.97  
3.00

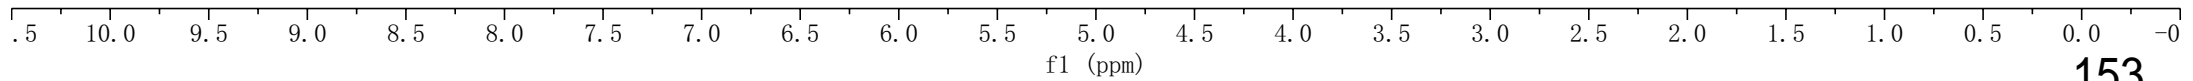



**1ff**

**<sup>13</sup>C NMR (125 MHz, CDCl<sub>3</sub>)**

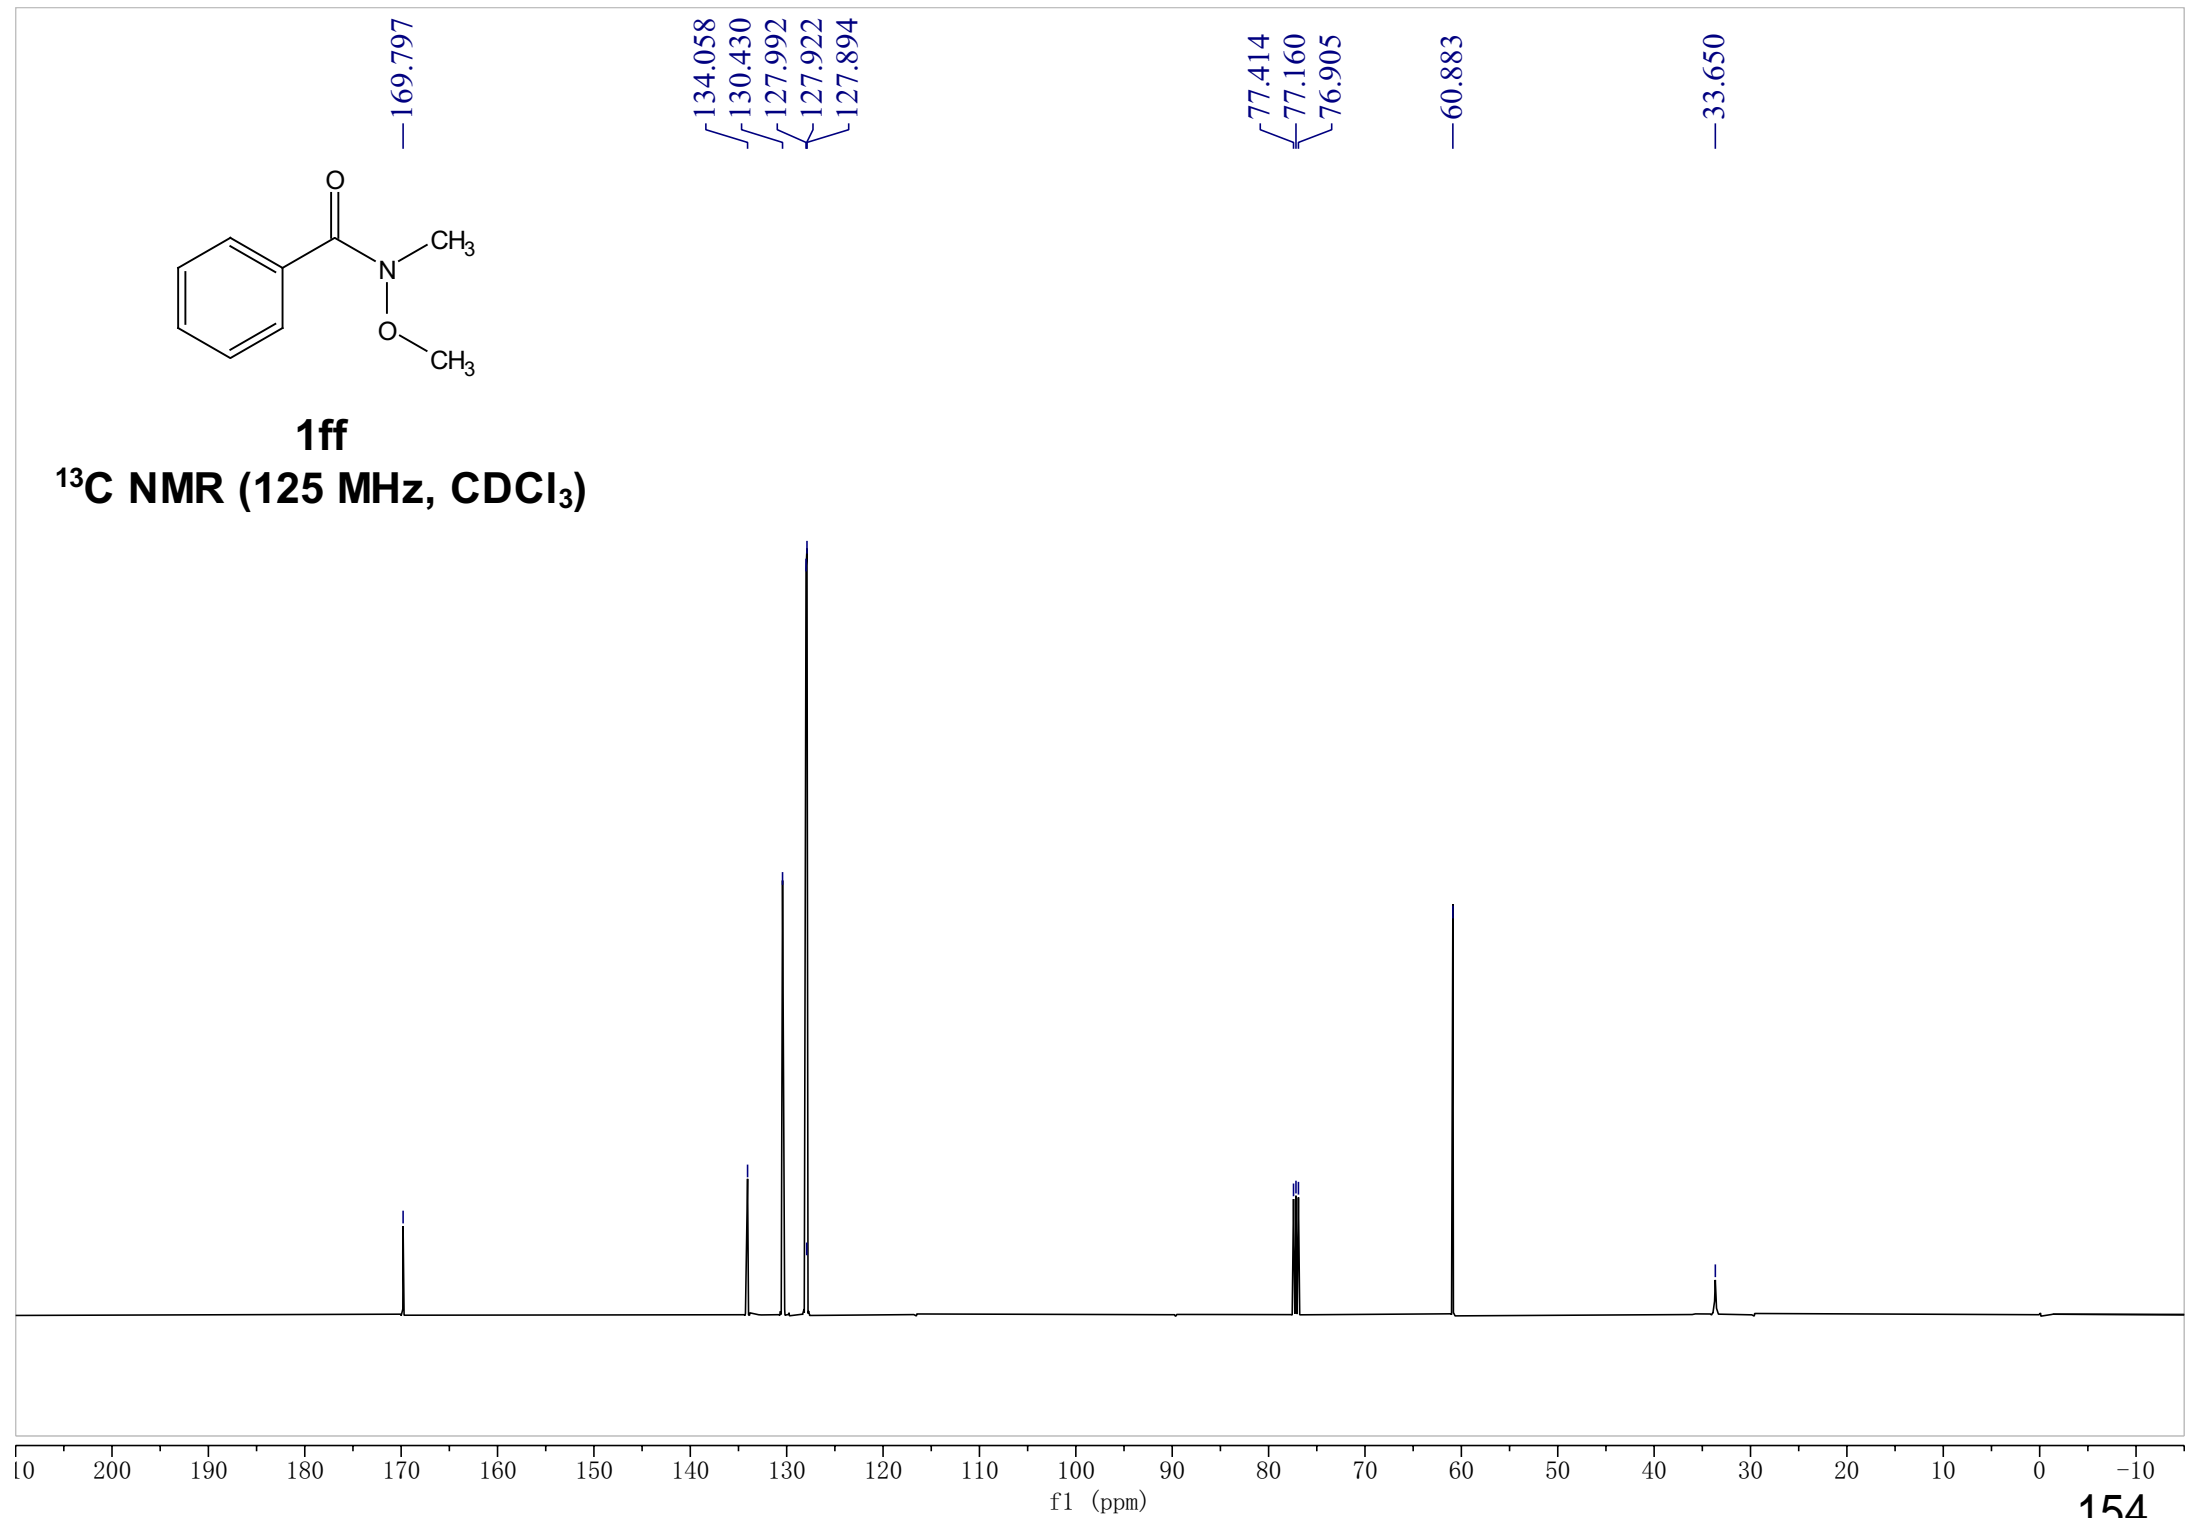

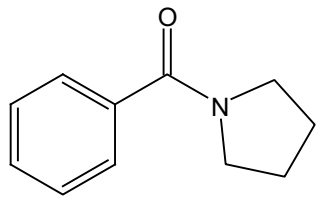

**1gg**

**<sup>1</sup>H NMR (400 MHz, CDCl<sub>3</sub>)**

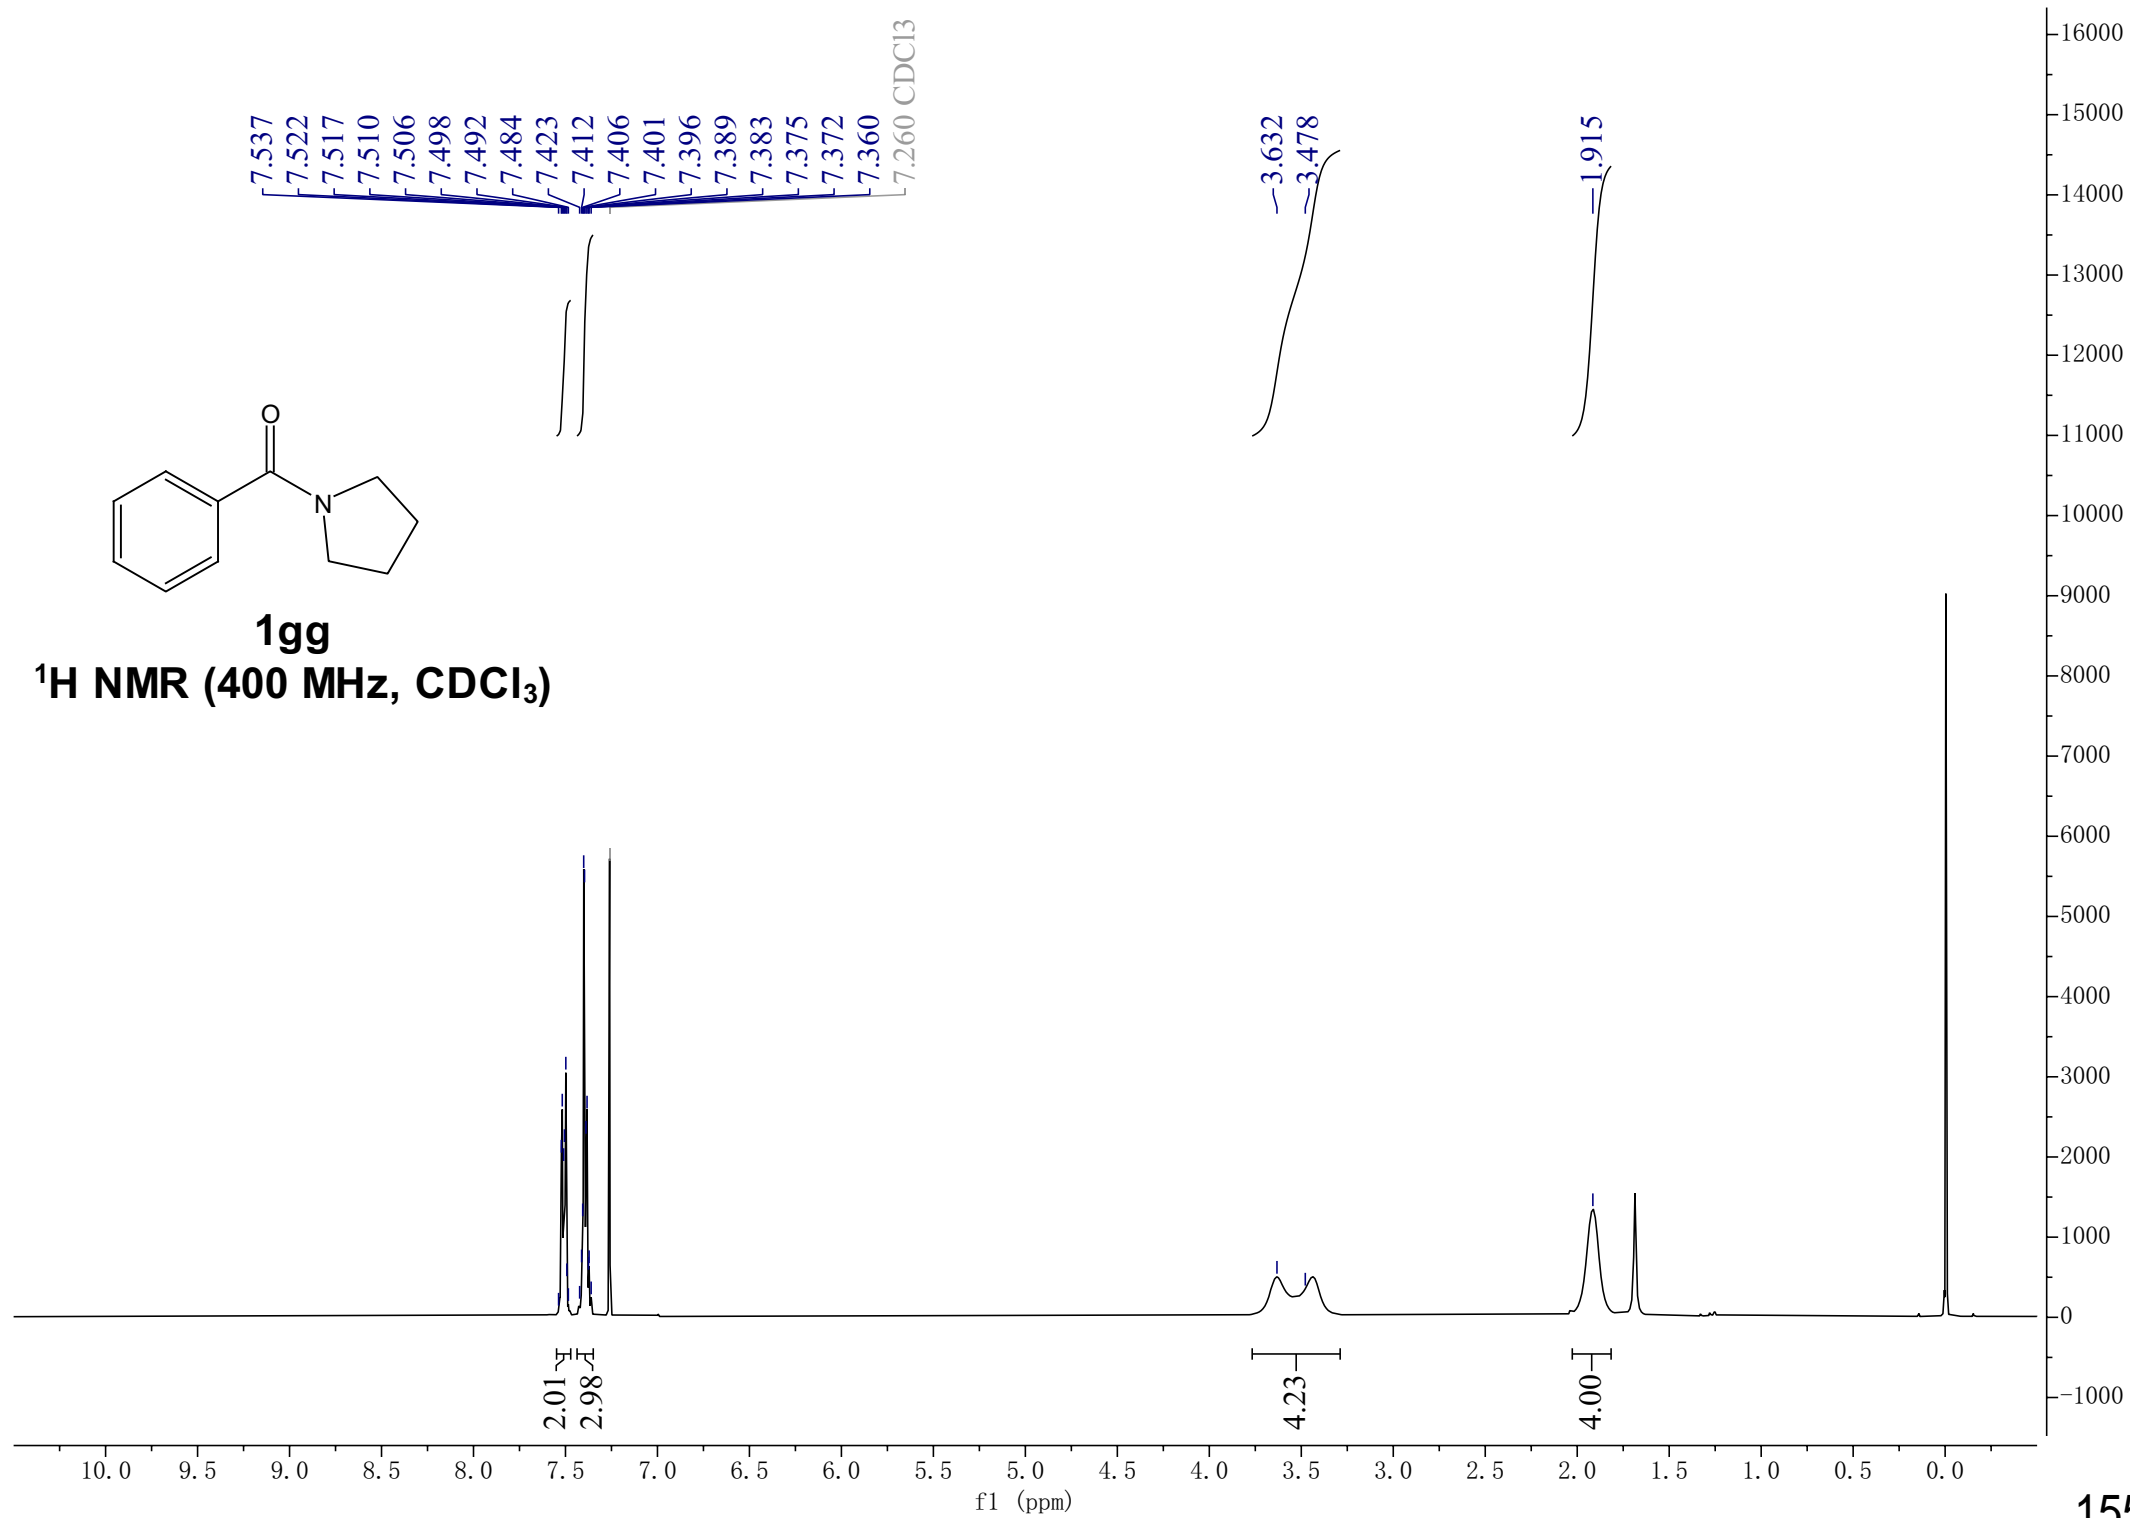

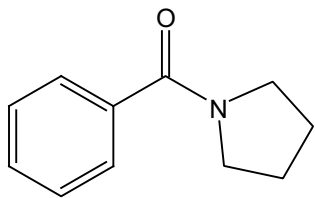

**1gg**

**<sup>13</sup>C NMR (100 MHz, CDCl<sub>3</sub>)**

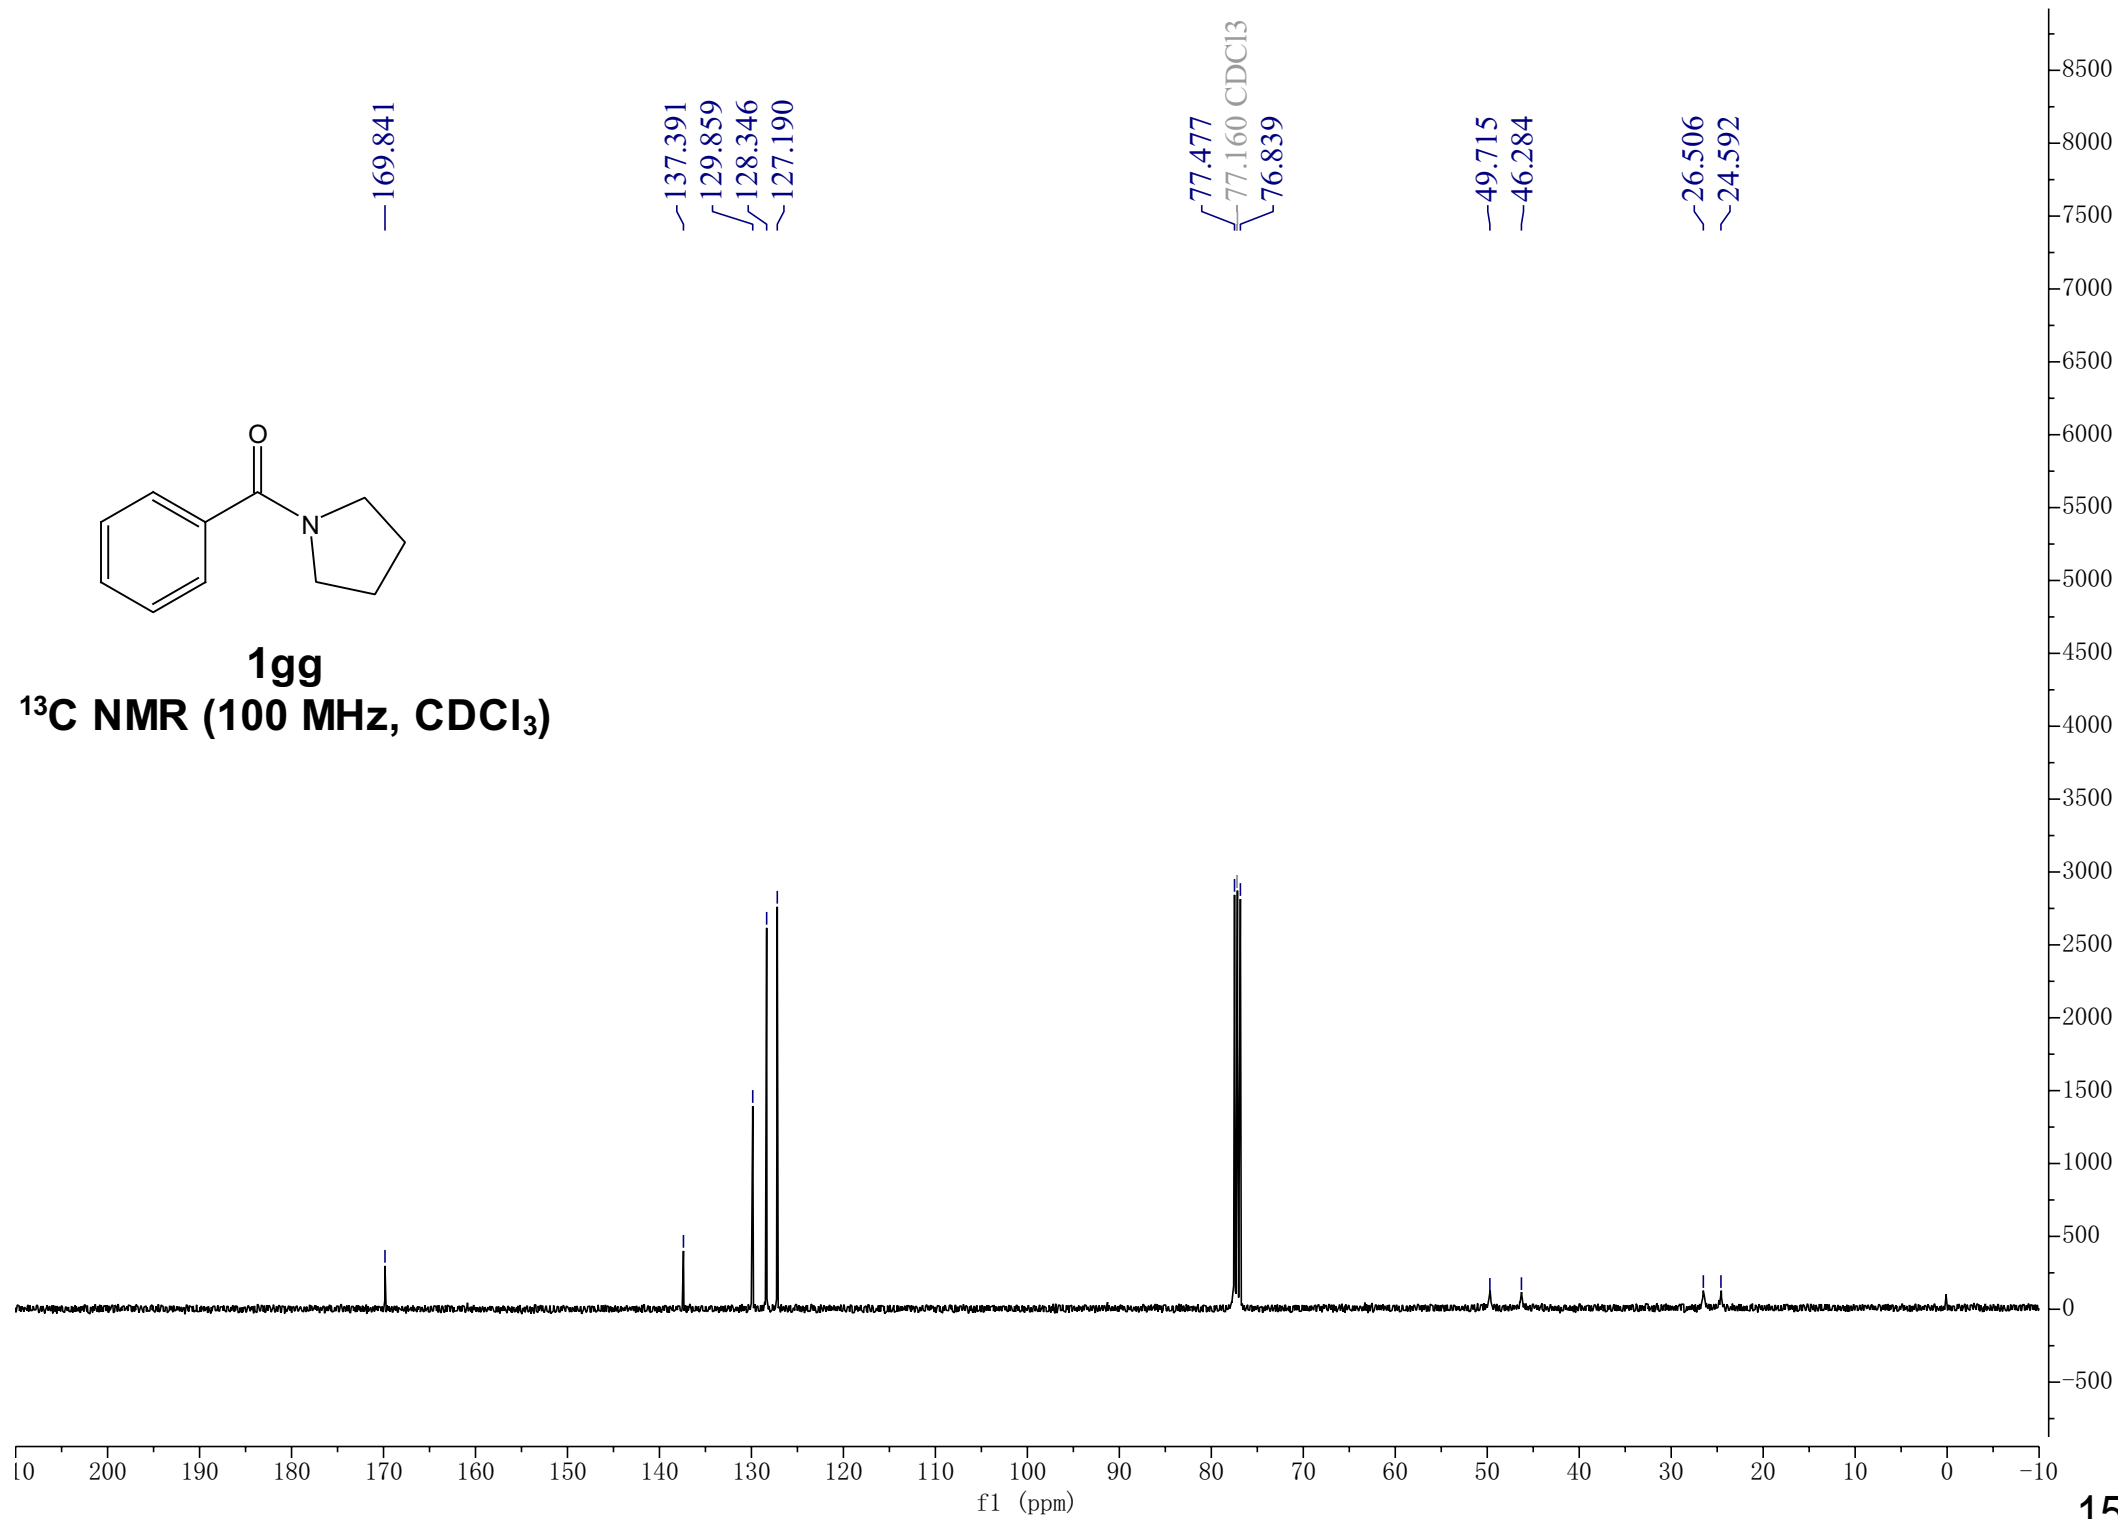

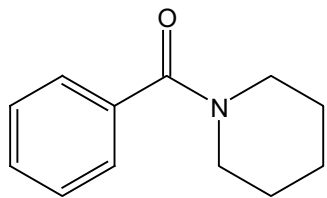

**1h**  
**<sup>1</sup>H NMR (500 MHz, CDCl<sub>3</sub>)**

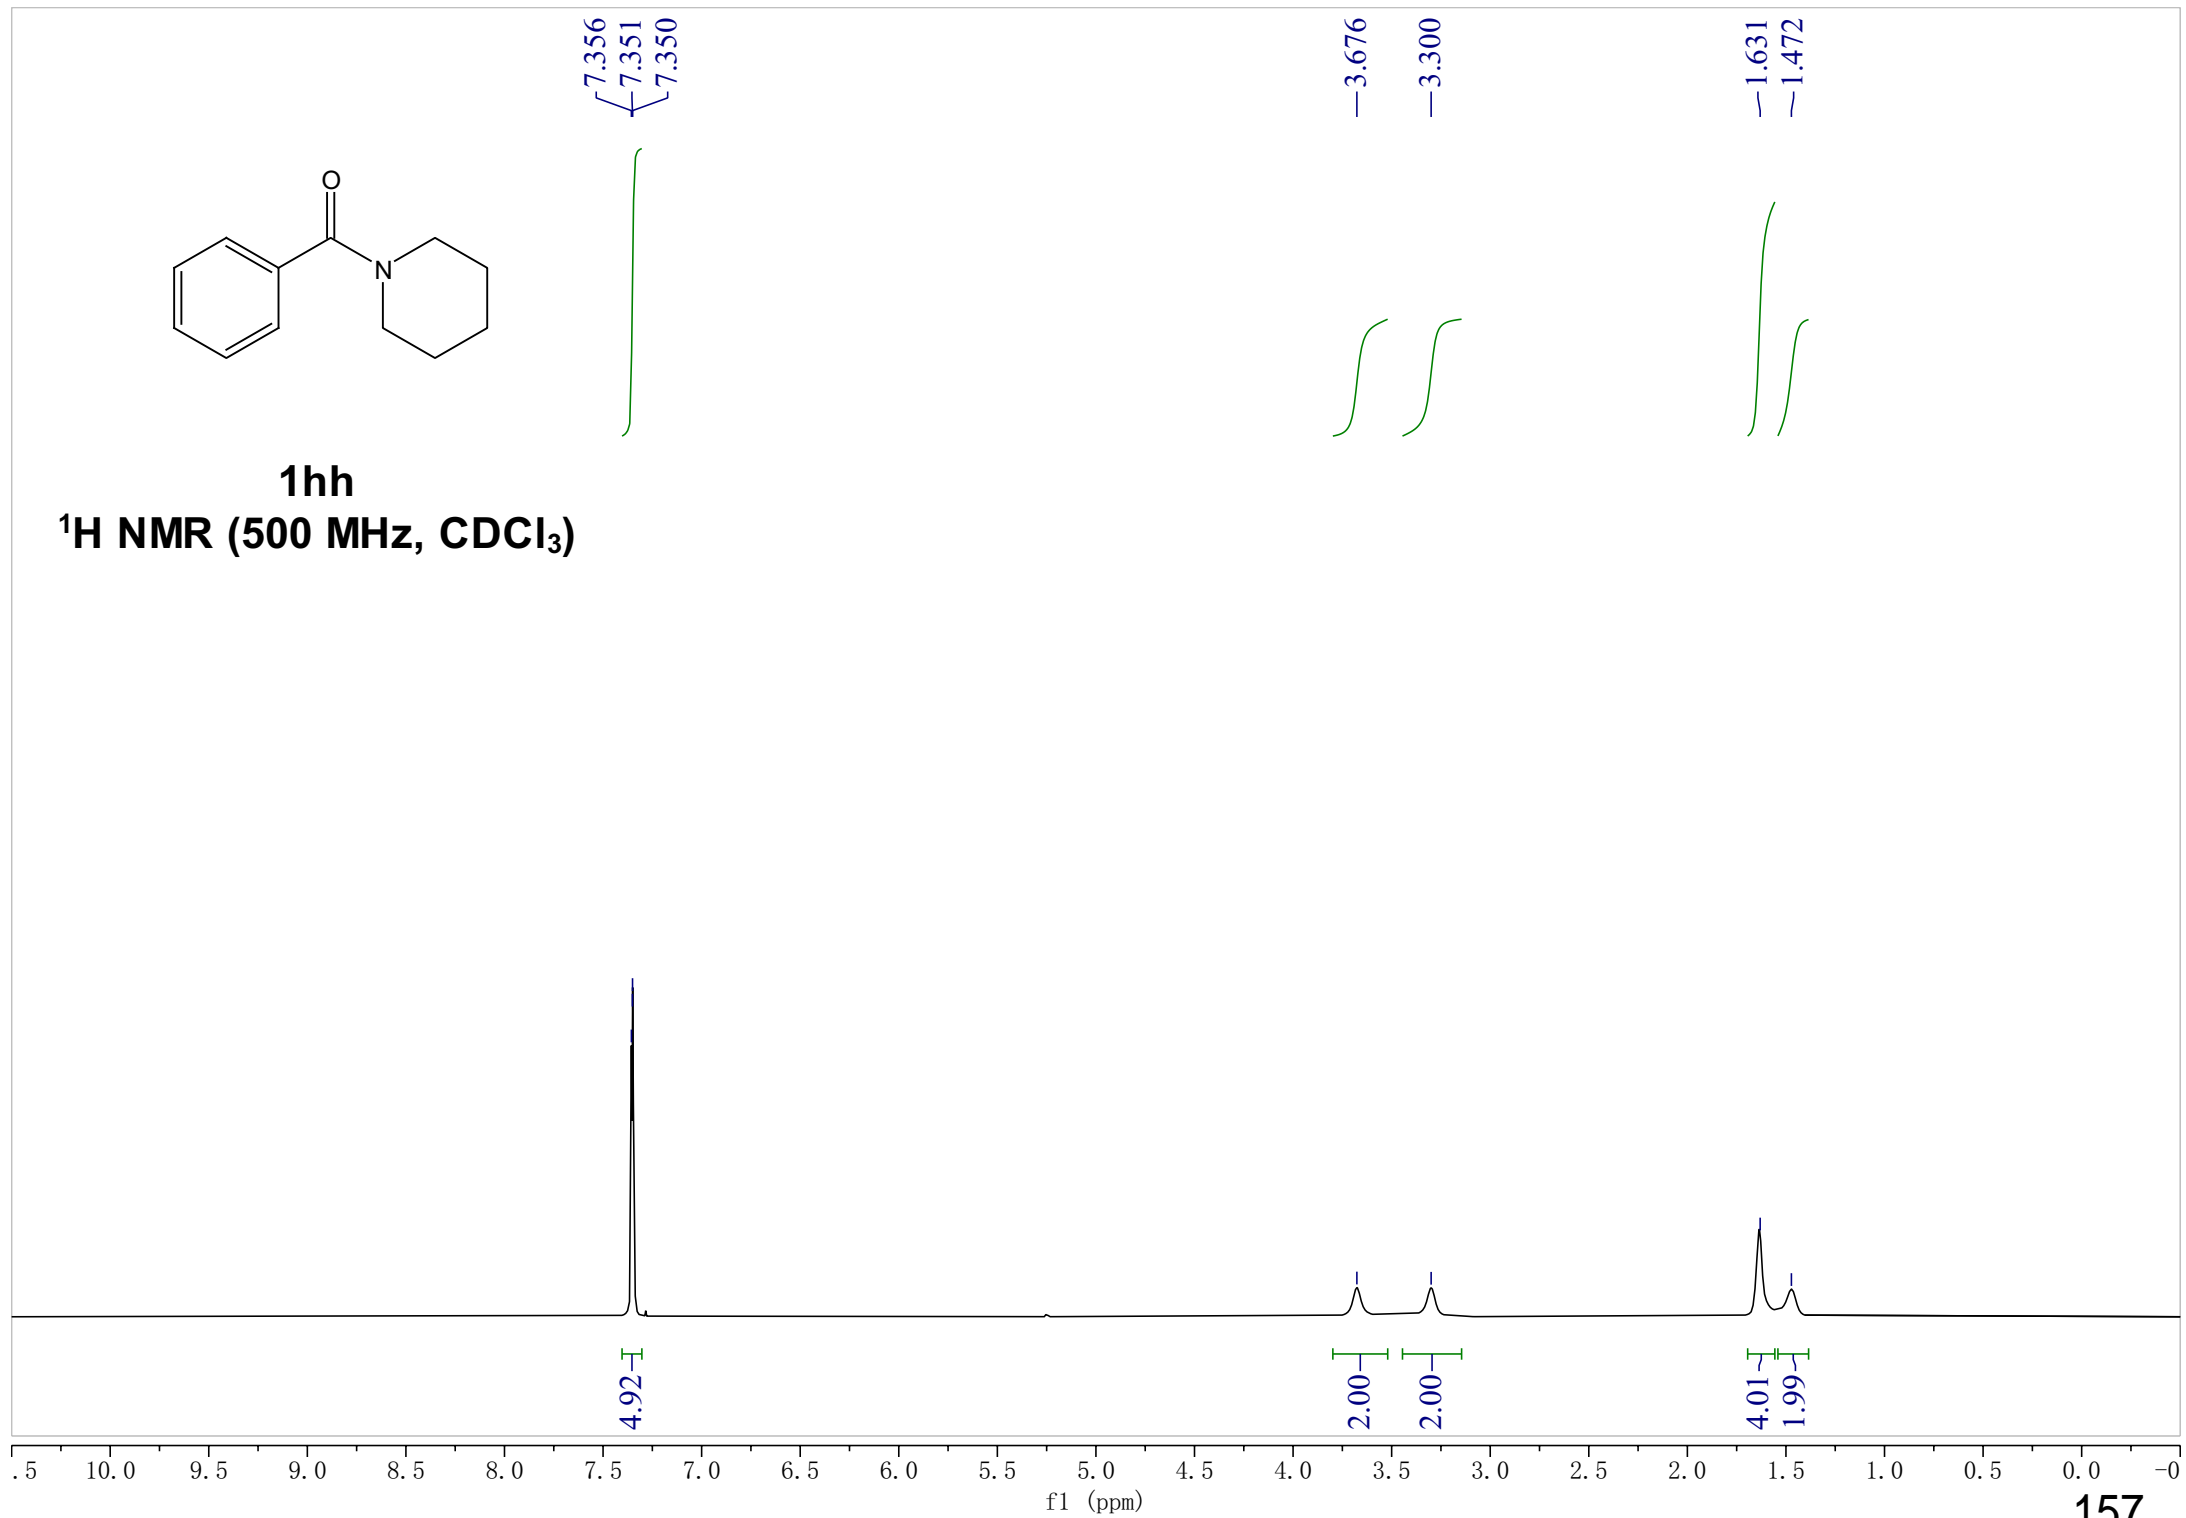

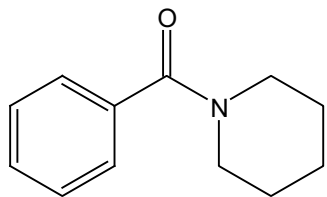

1h

<sup>13</sup>C NMR (125 MHz, CDCl<sub>3</sub>)

170.174

136.445

129.238

128.296

126.678

77.399

77.144

76.890

48.644

42.996

26.443

25.544

24.493

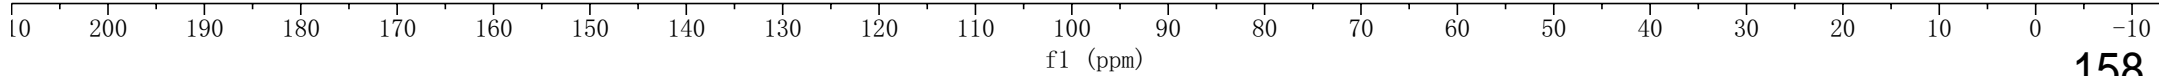

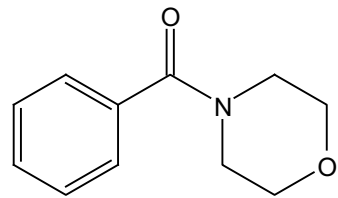

**1ii**

**<sup>1</sup>H NMR (400 MHz, CDCl<sub>3</sub>)**

7.441  
7.435  
7.430  
7.423  
7.418  
7.411  
7.407  
7.403  
7.393  
7.385  
7.260 CDCl<sub>3</sub>

3.831  
3.676  
3.422

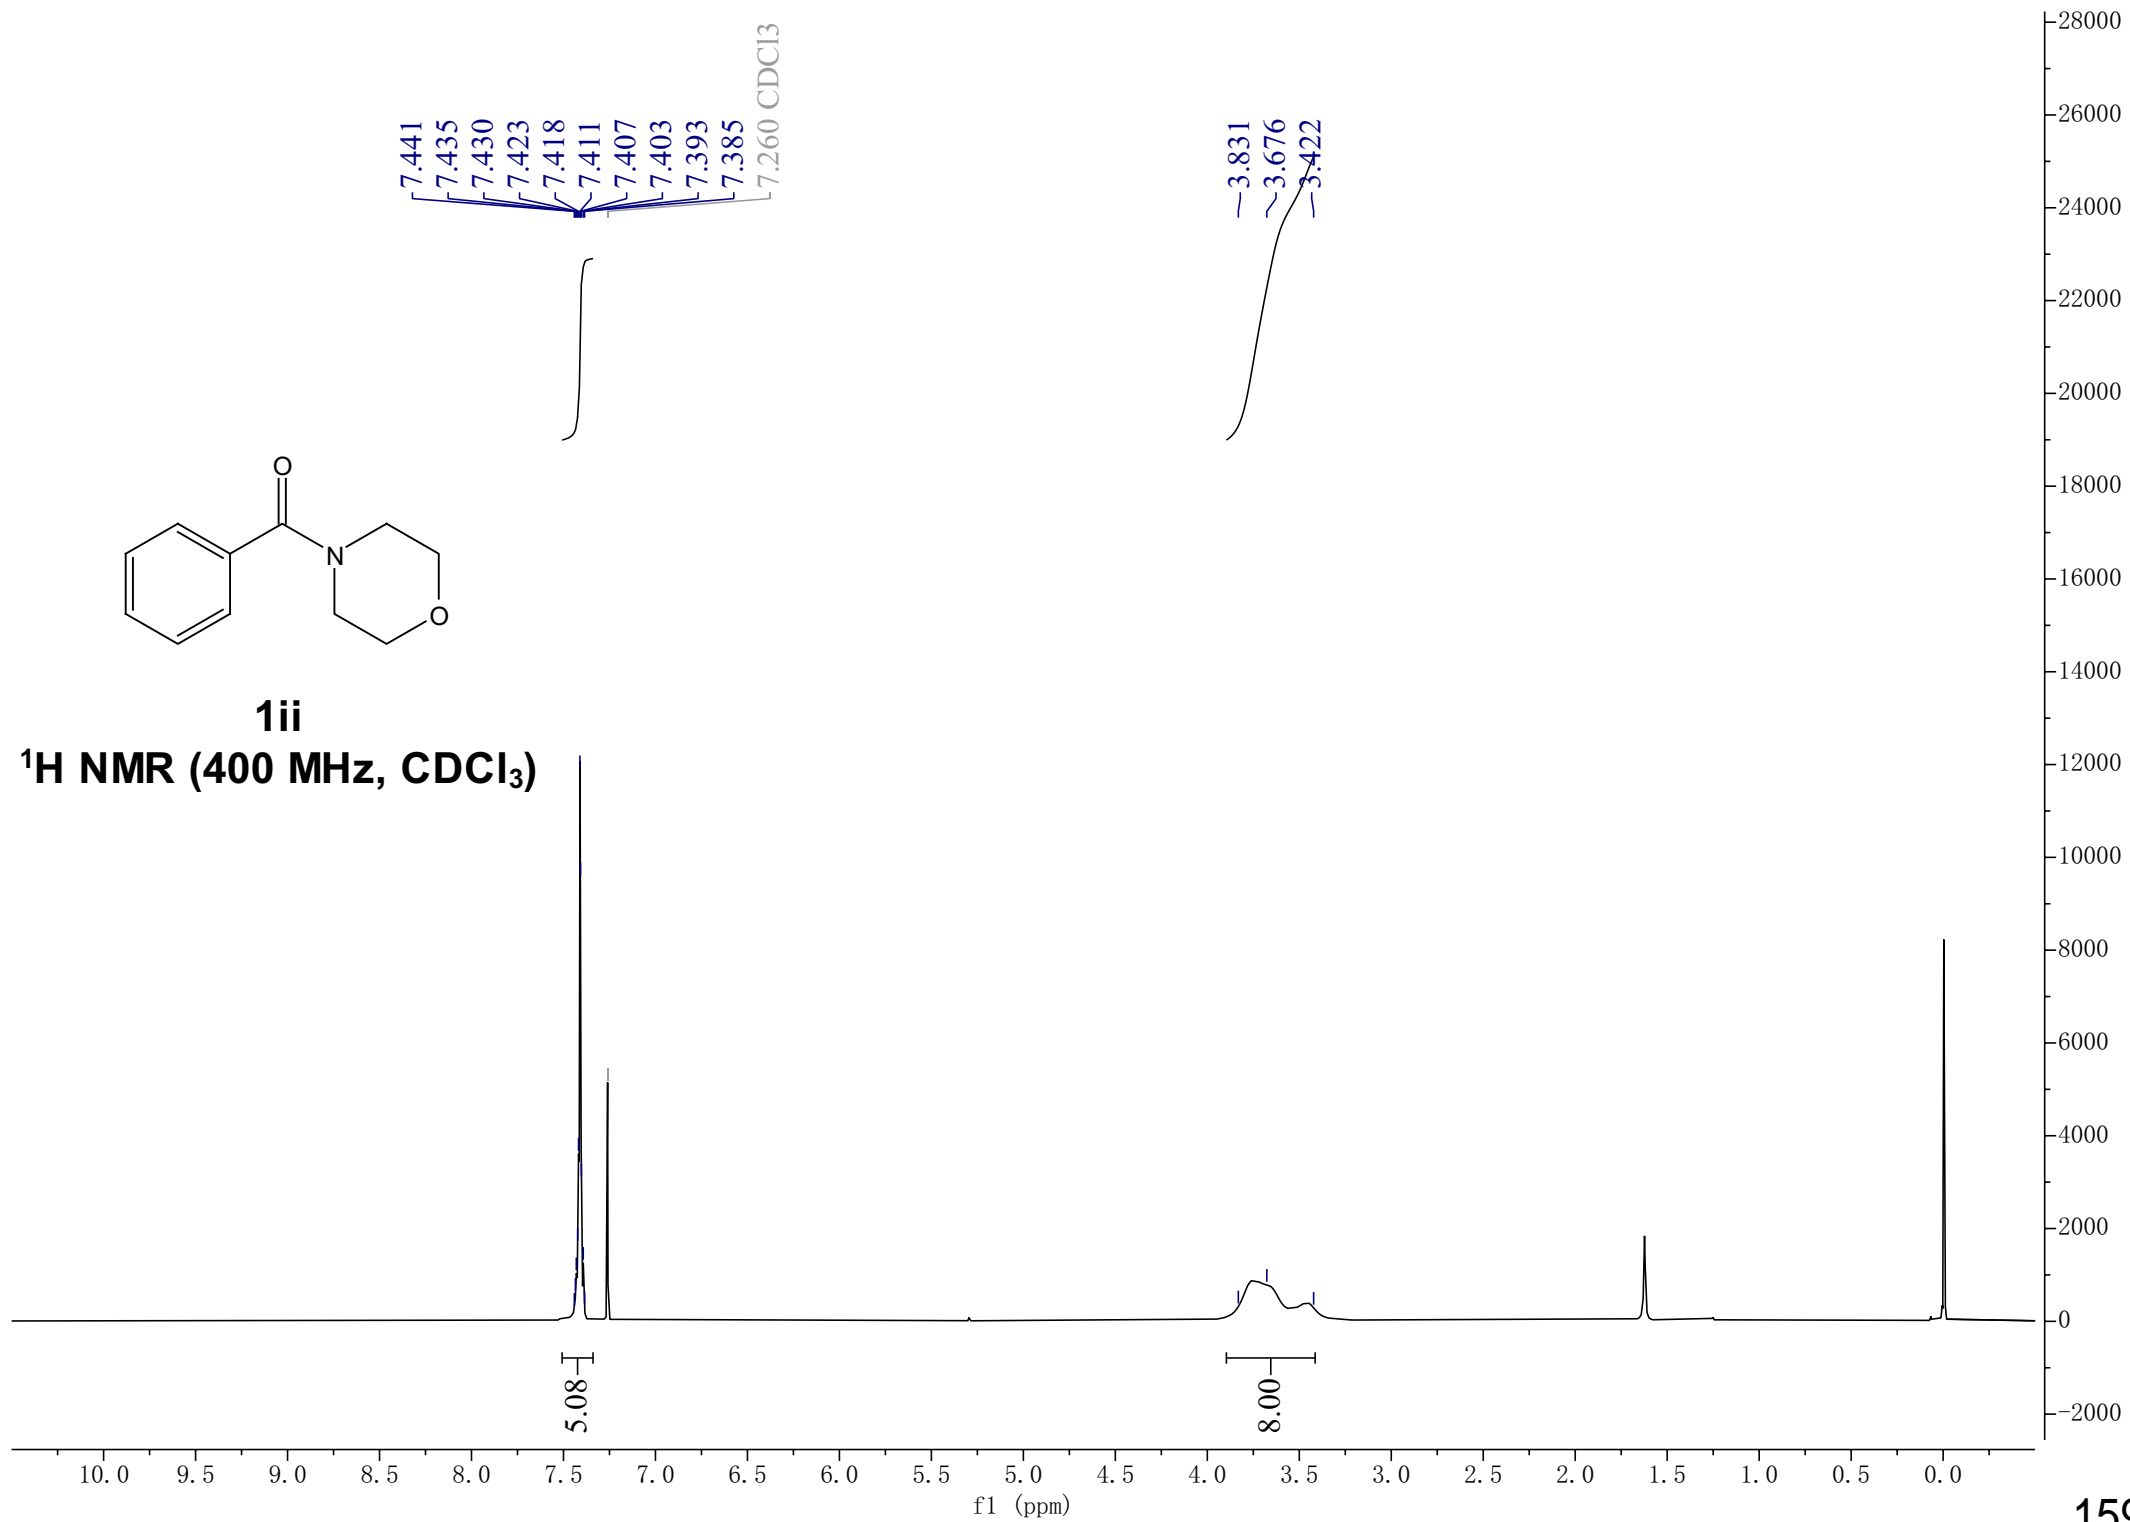



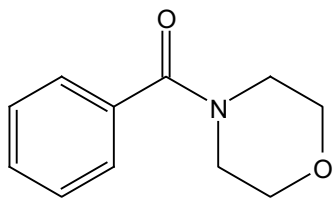

**1ii**

**$^{13}\text{C}$  NMR (100 MHz,  $\text{CDCl}_3$ )**

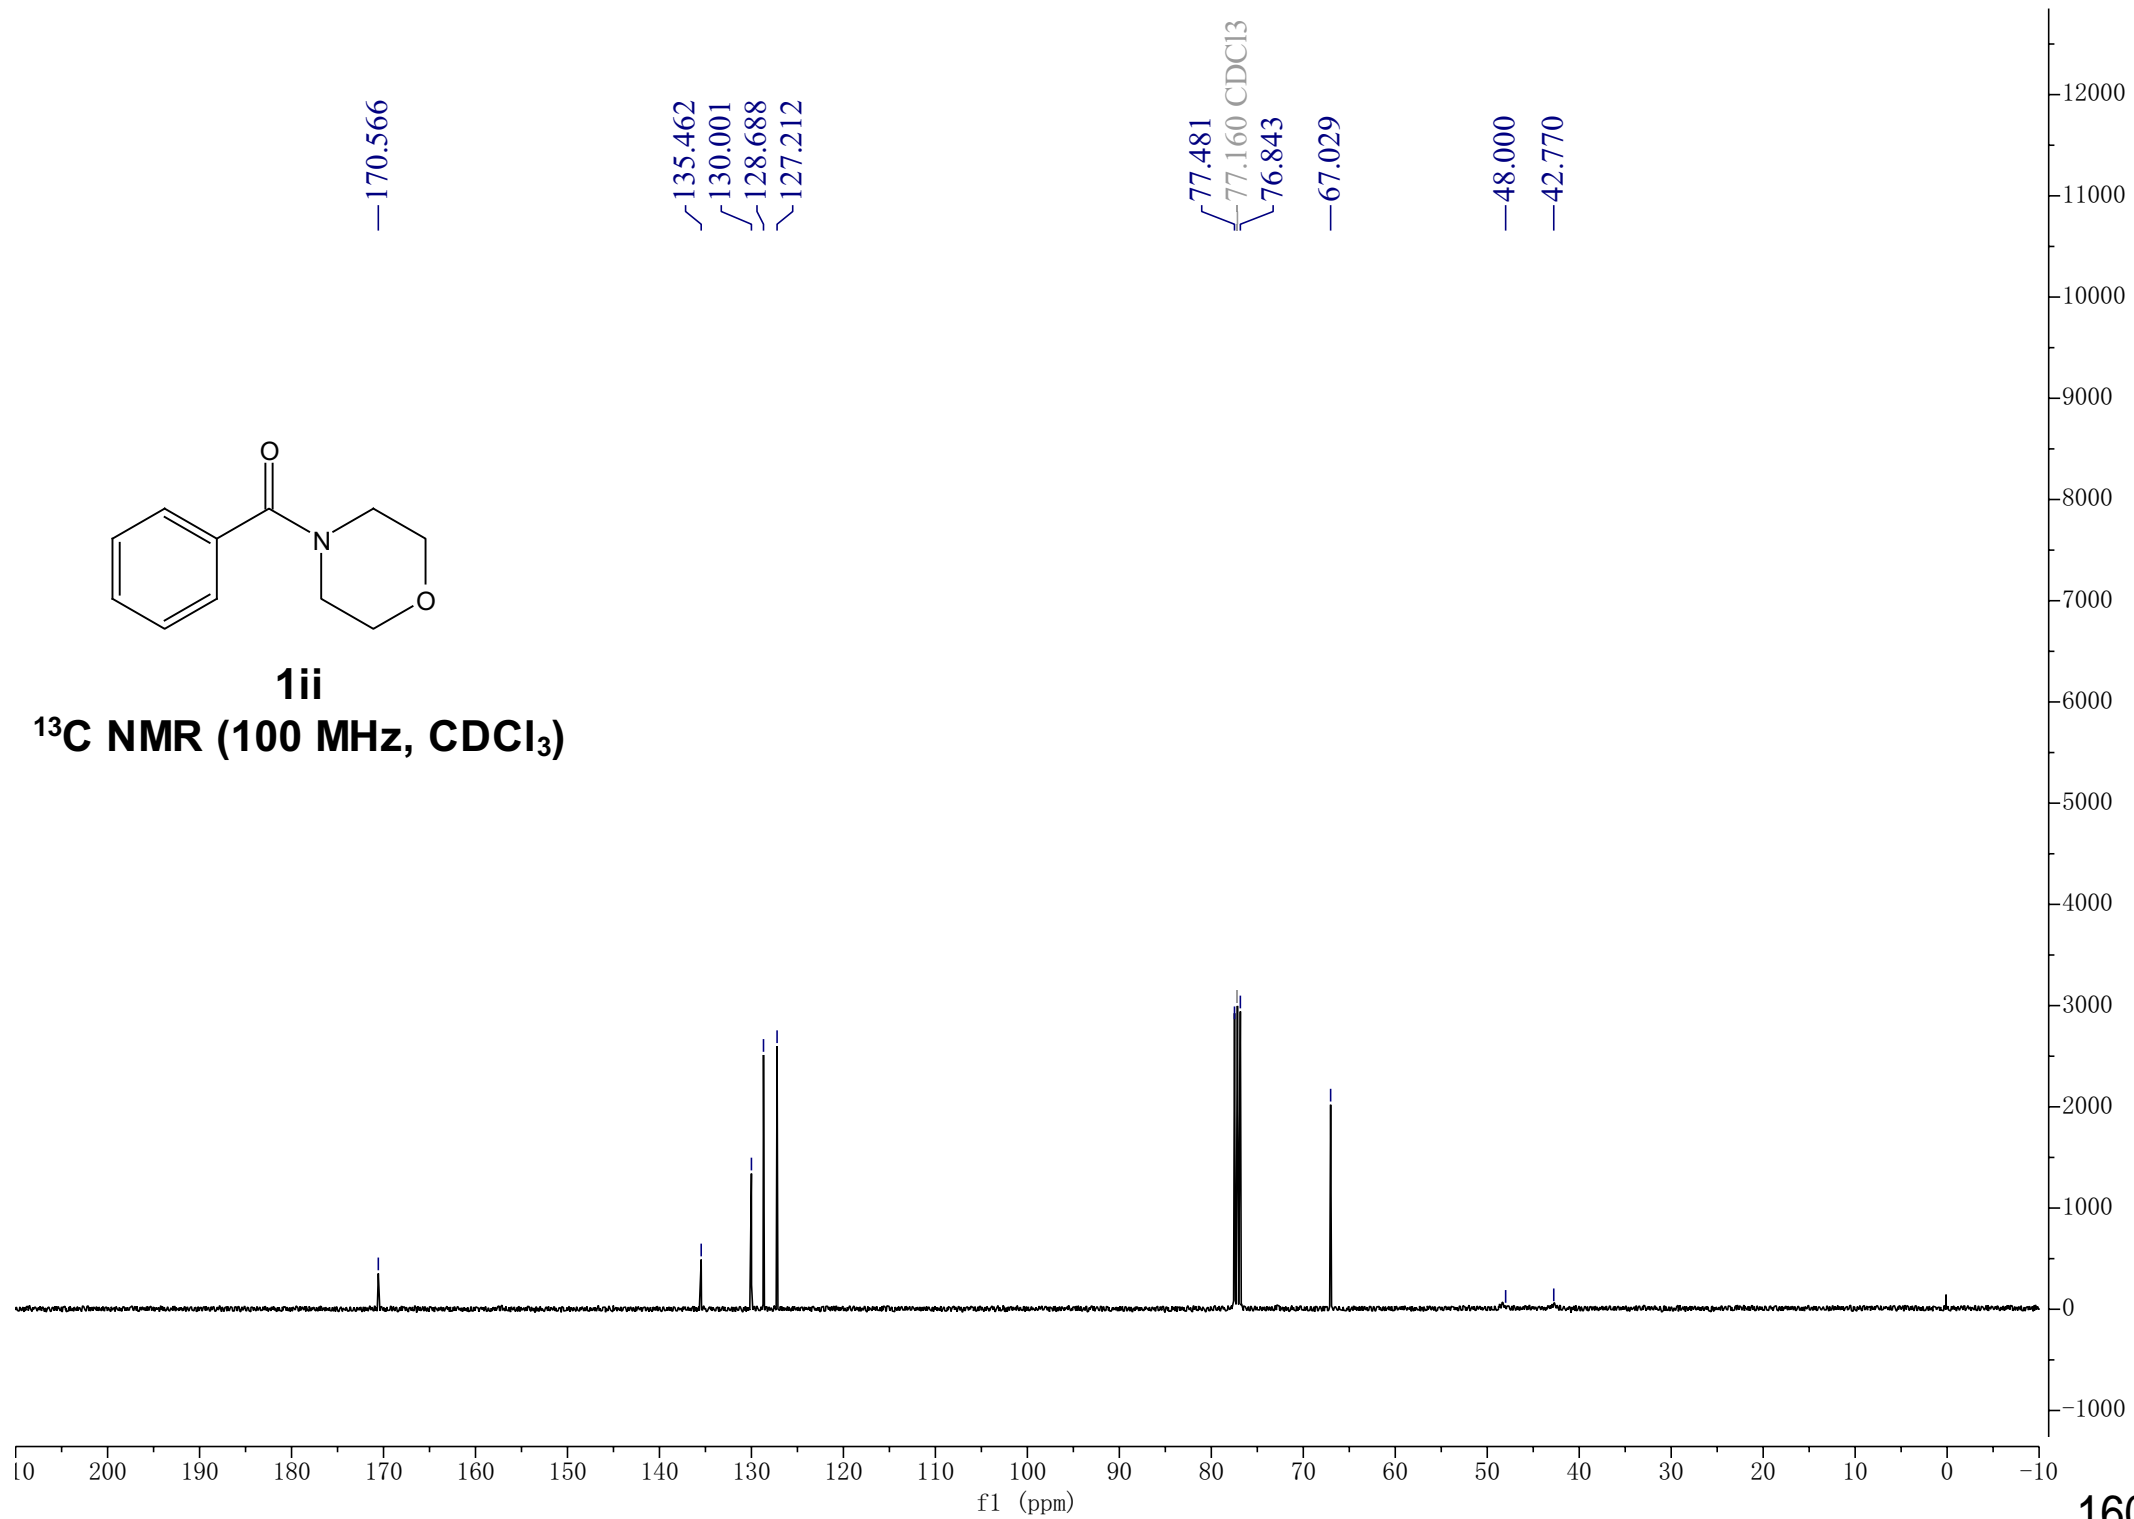

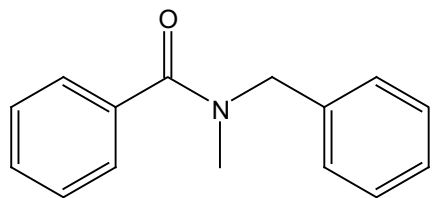

1jj

<sup>1</sup>H NMR (400 MHz, CDCl<sub>3</sub>)

7.473  
7.468  
7.449  
7.389  
7.384  
7.362  
7.347  
7.319  
7.313  
7.260 CDCl<sub>3</sub>  
7.179

4.768  
4.518  
4.515

3.034  
2.868

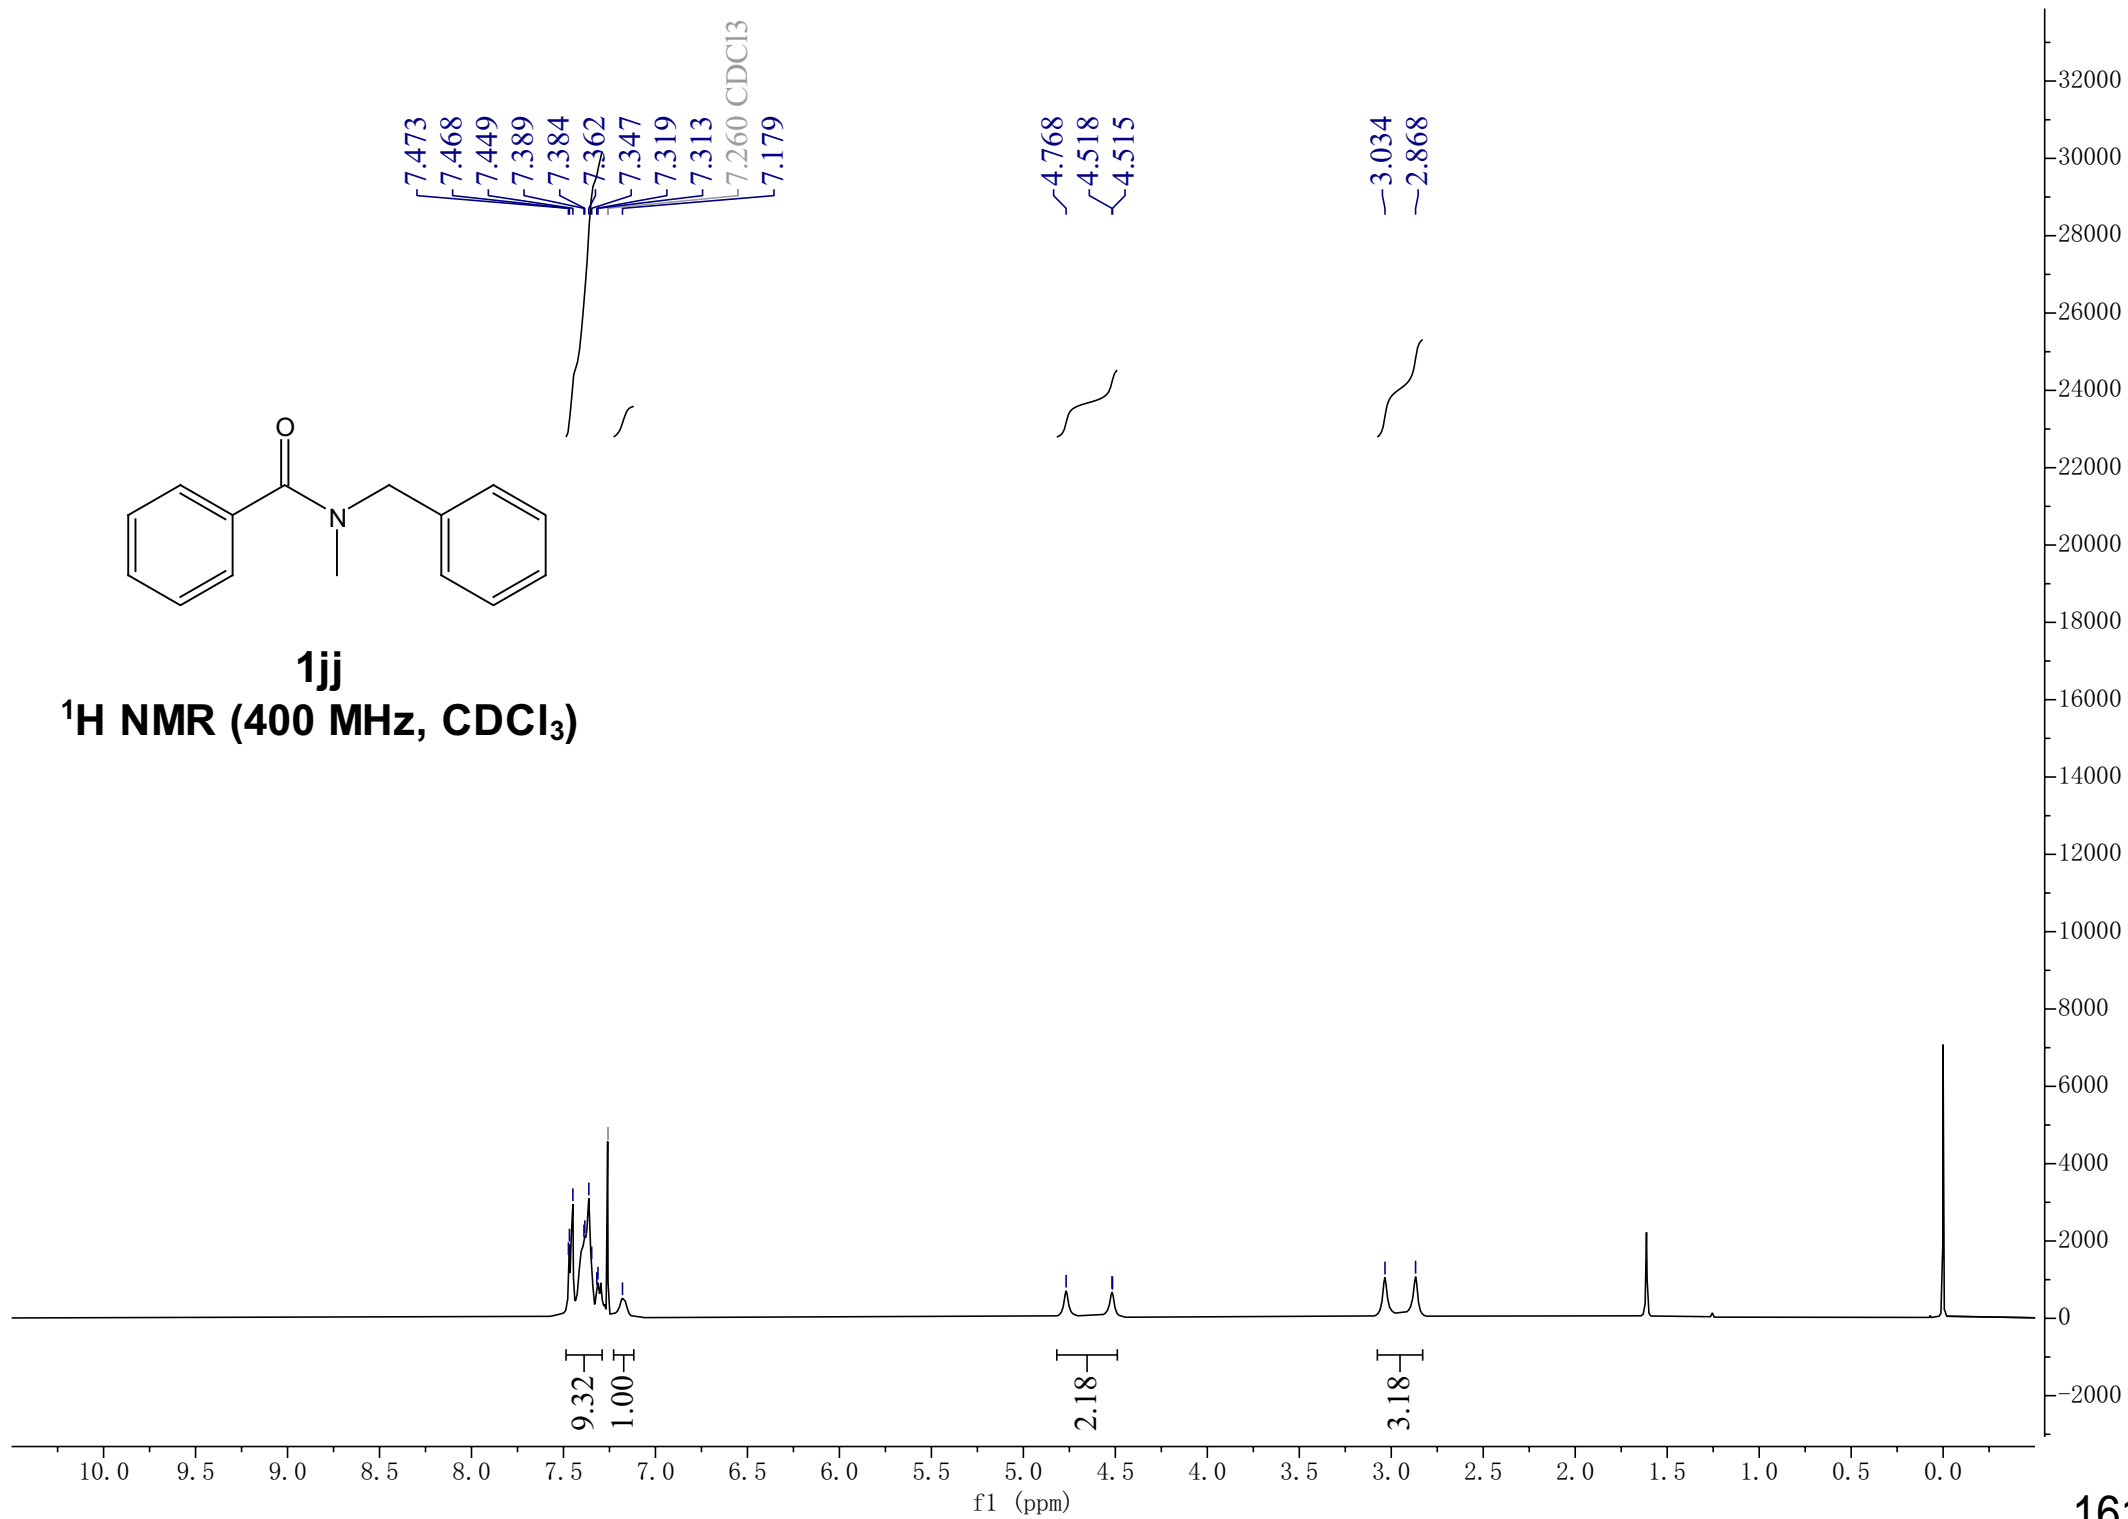

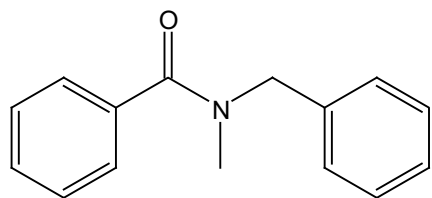

**1jj**

**$^{13}\text{C}$  NMR (100 MHz,  $\text{CDCl}_3$ )**

172.272  
171.742

137.184  
136.747  
136.387  
129.736  
128.904  
128.570  
128.306  
127.685  
127.112  
126.926

77.473  
77.160  $\text{CDCl}_3$   
76.839

55.296  
50.920

37.573  
32.292

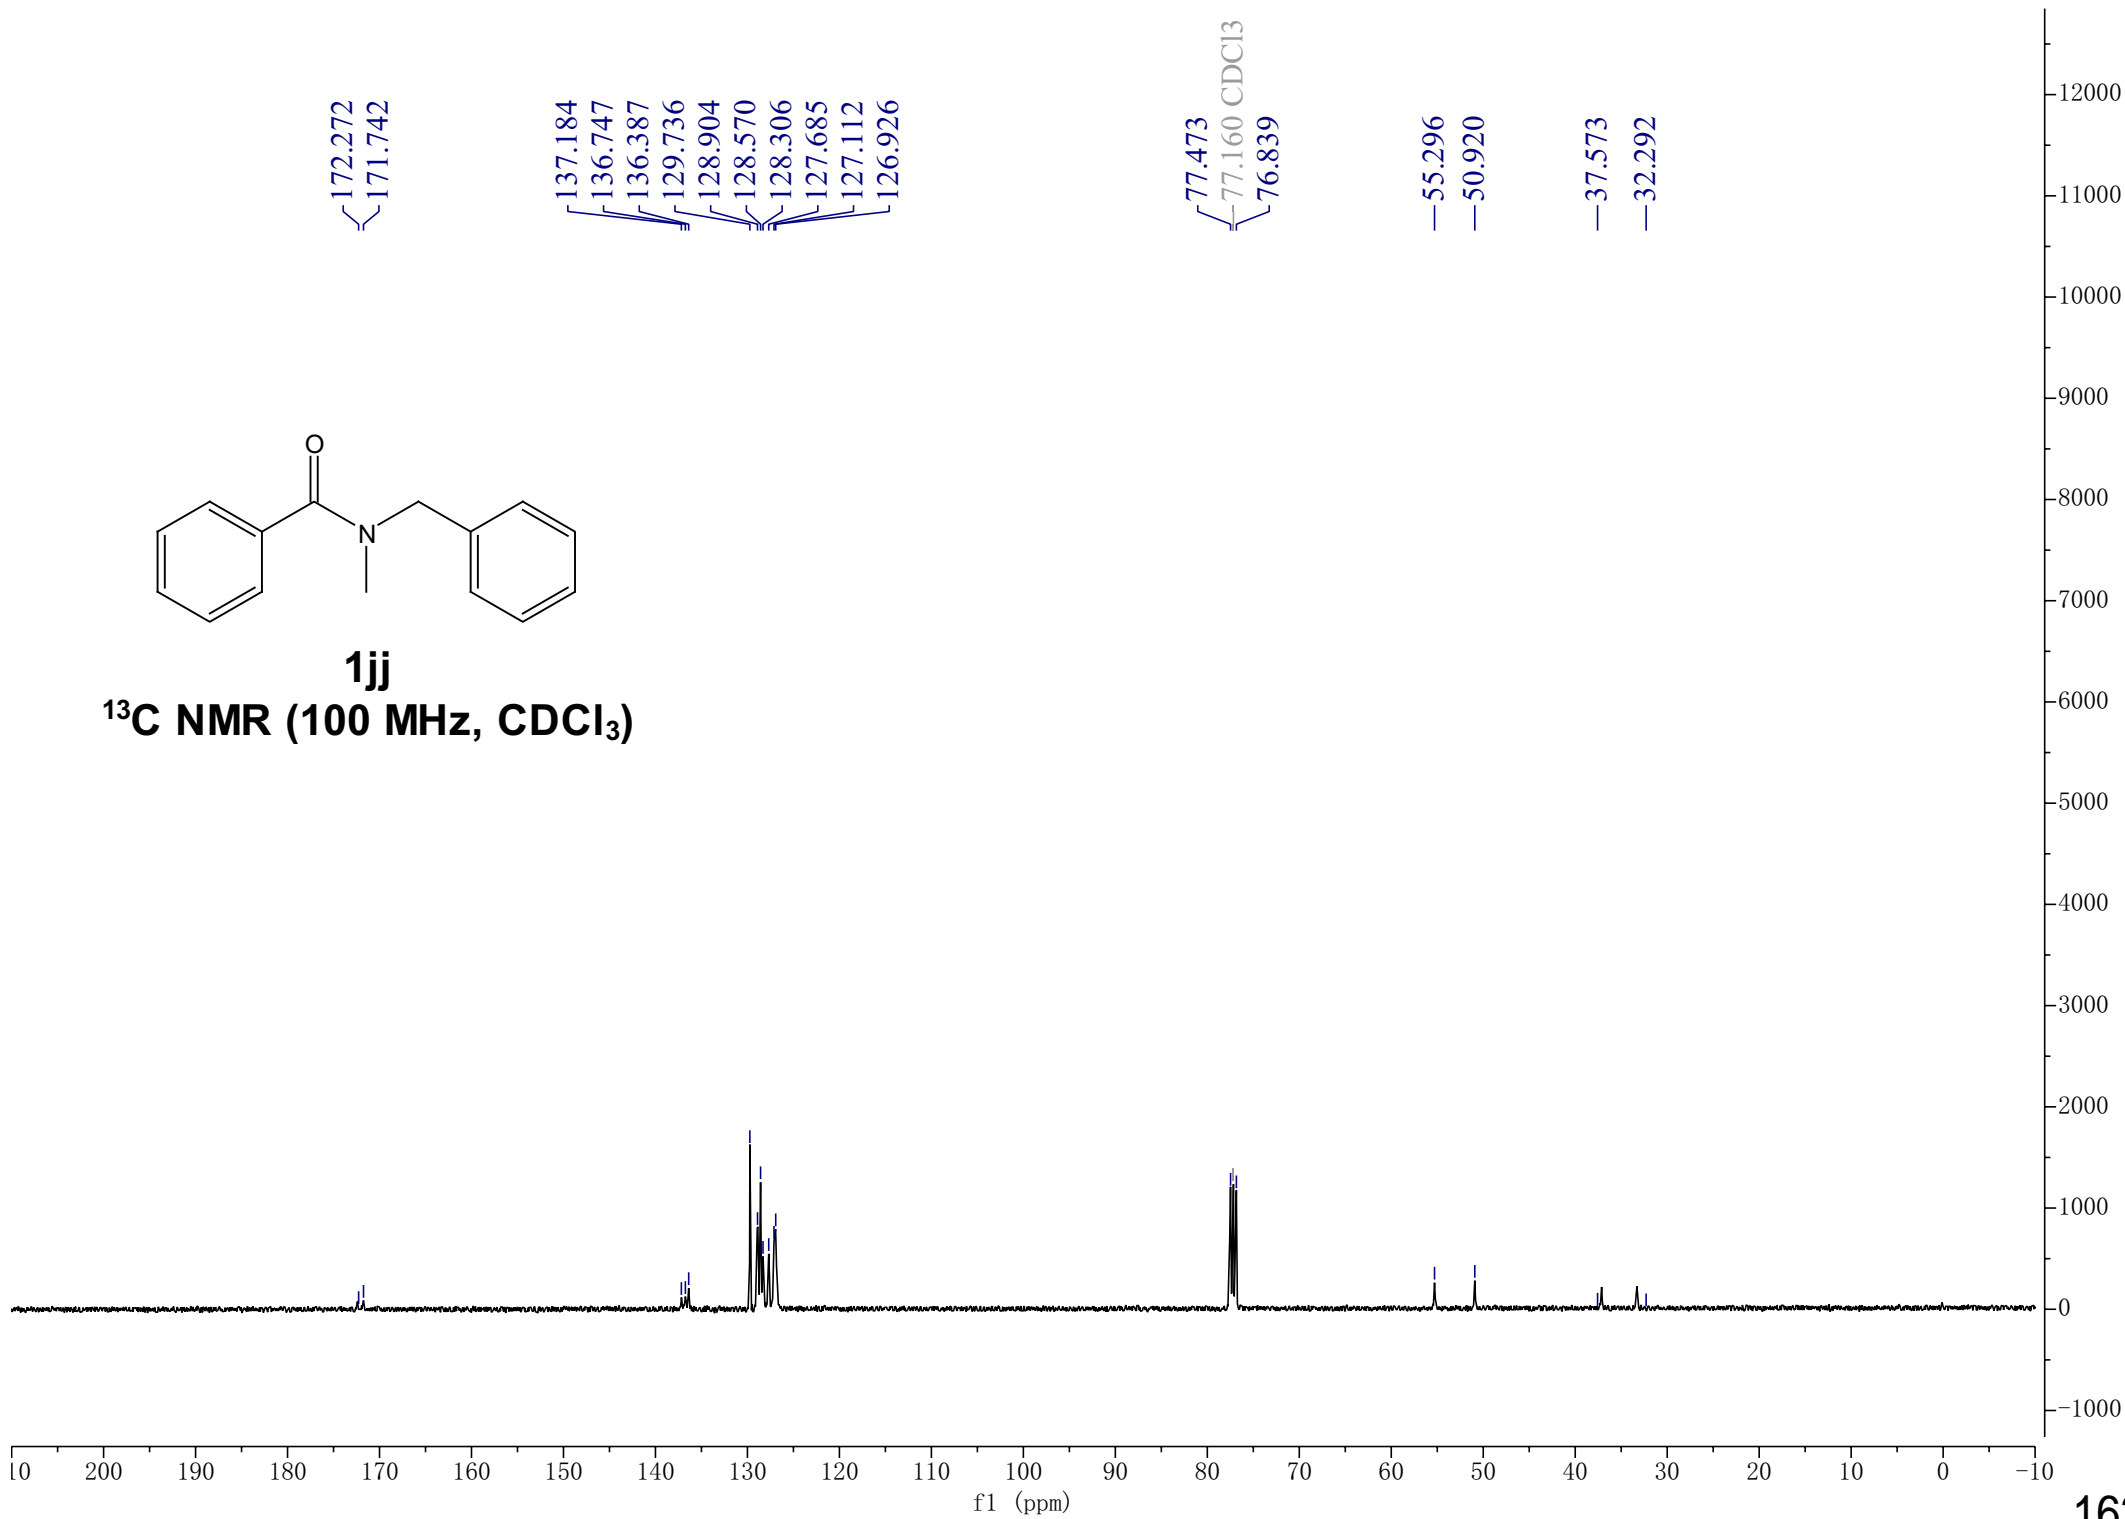

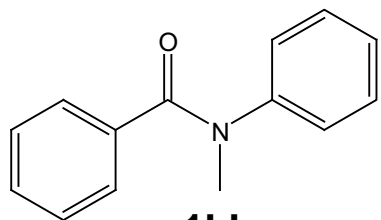

1kk

<sup>1</sup>H NMR (400 MHz, CDCl<sub>3</sub>)

7.310  
7.304  
7.301  
7.297  
7.289  
7.284  
7.280  
7.260 CDCl<sub>3</sub>  
7.246  
7.237  
7.228  
7.219  
7.213  
7.206  
7.200  
7.174  
7.159  
7.155  
7.149  
7.137  
7.131  
7.046  
7.042  
7.022

3.500

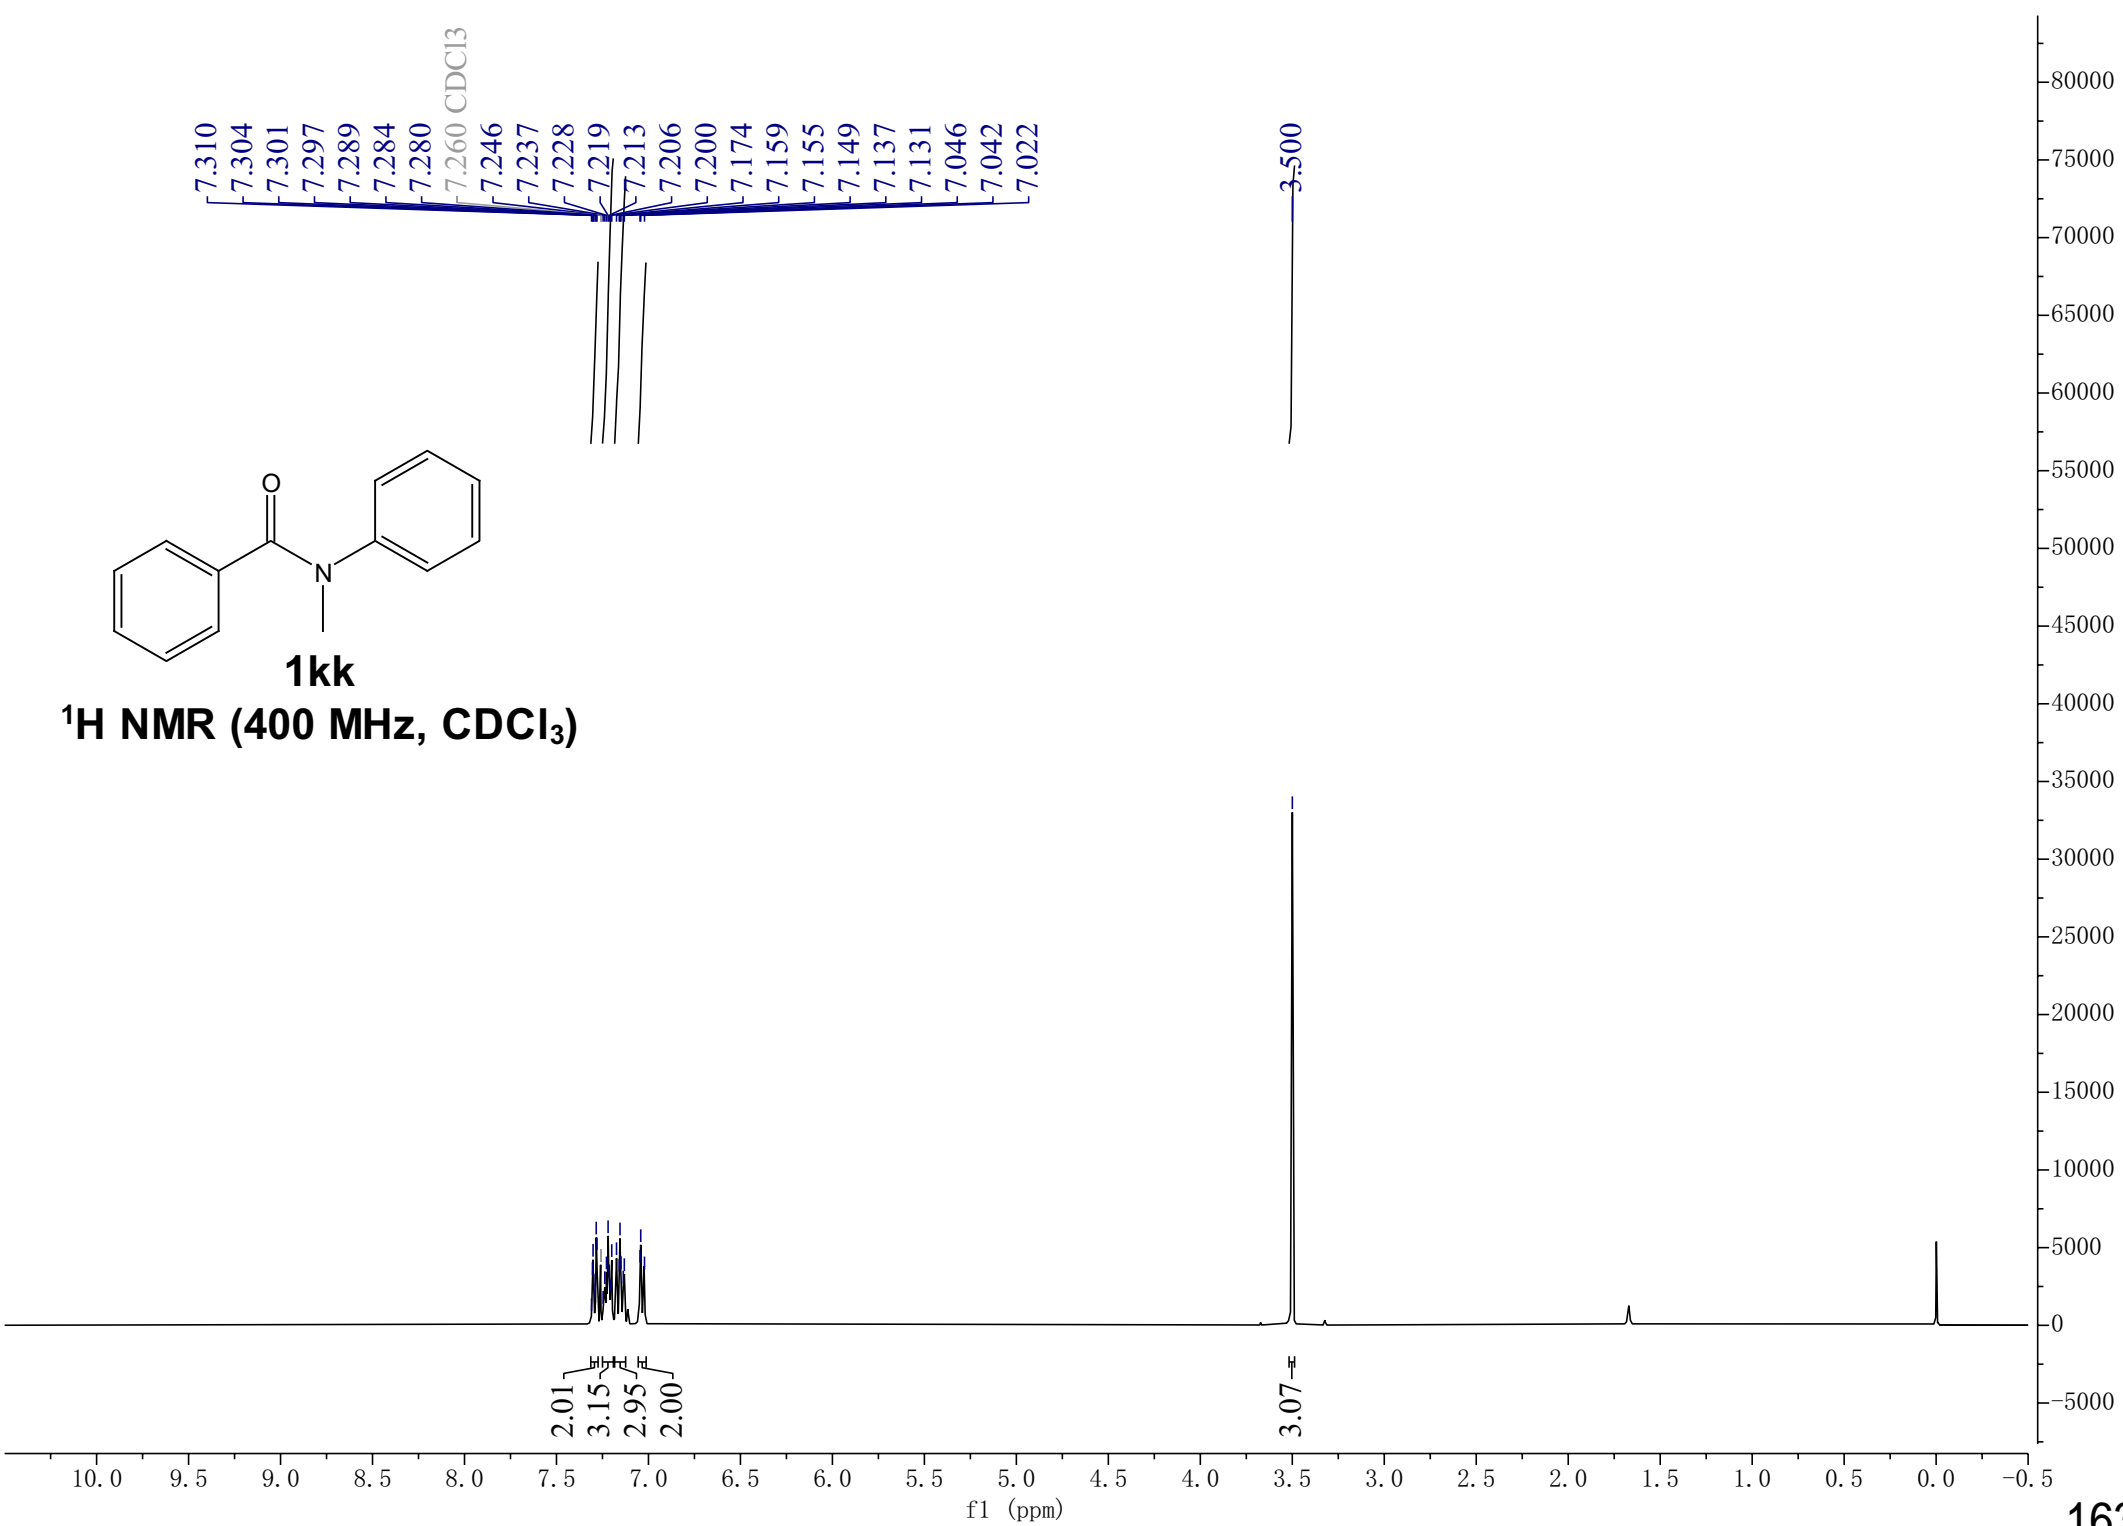

2.01  
3.15  
2.95  
2.00

3.07

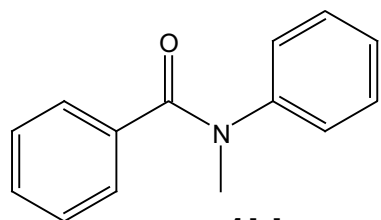

1k

<sup>13</sup>C NMR (100 MHz, CDCl<sub>3</sub>)

—170.785

—145.039

—136.053

—129.687

—129.246

—128.819

—127.824

—127.022

—126.585

—77.477

—77.160 CDCl<sub>3</sub>

—76.865

—76.839

—38.501

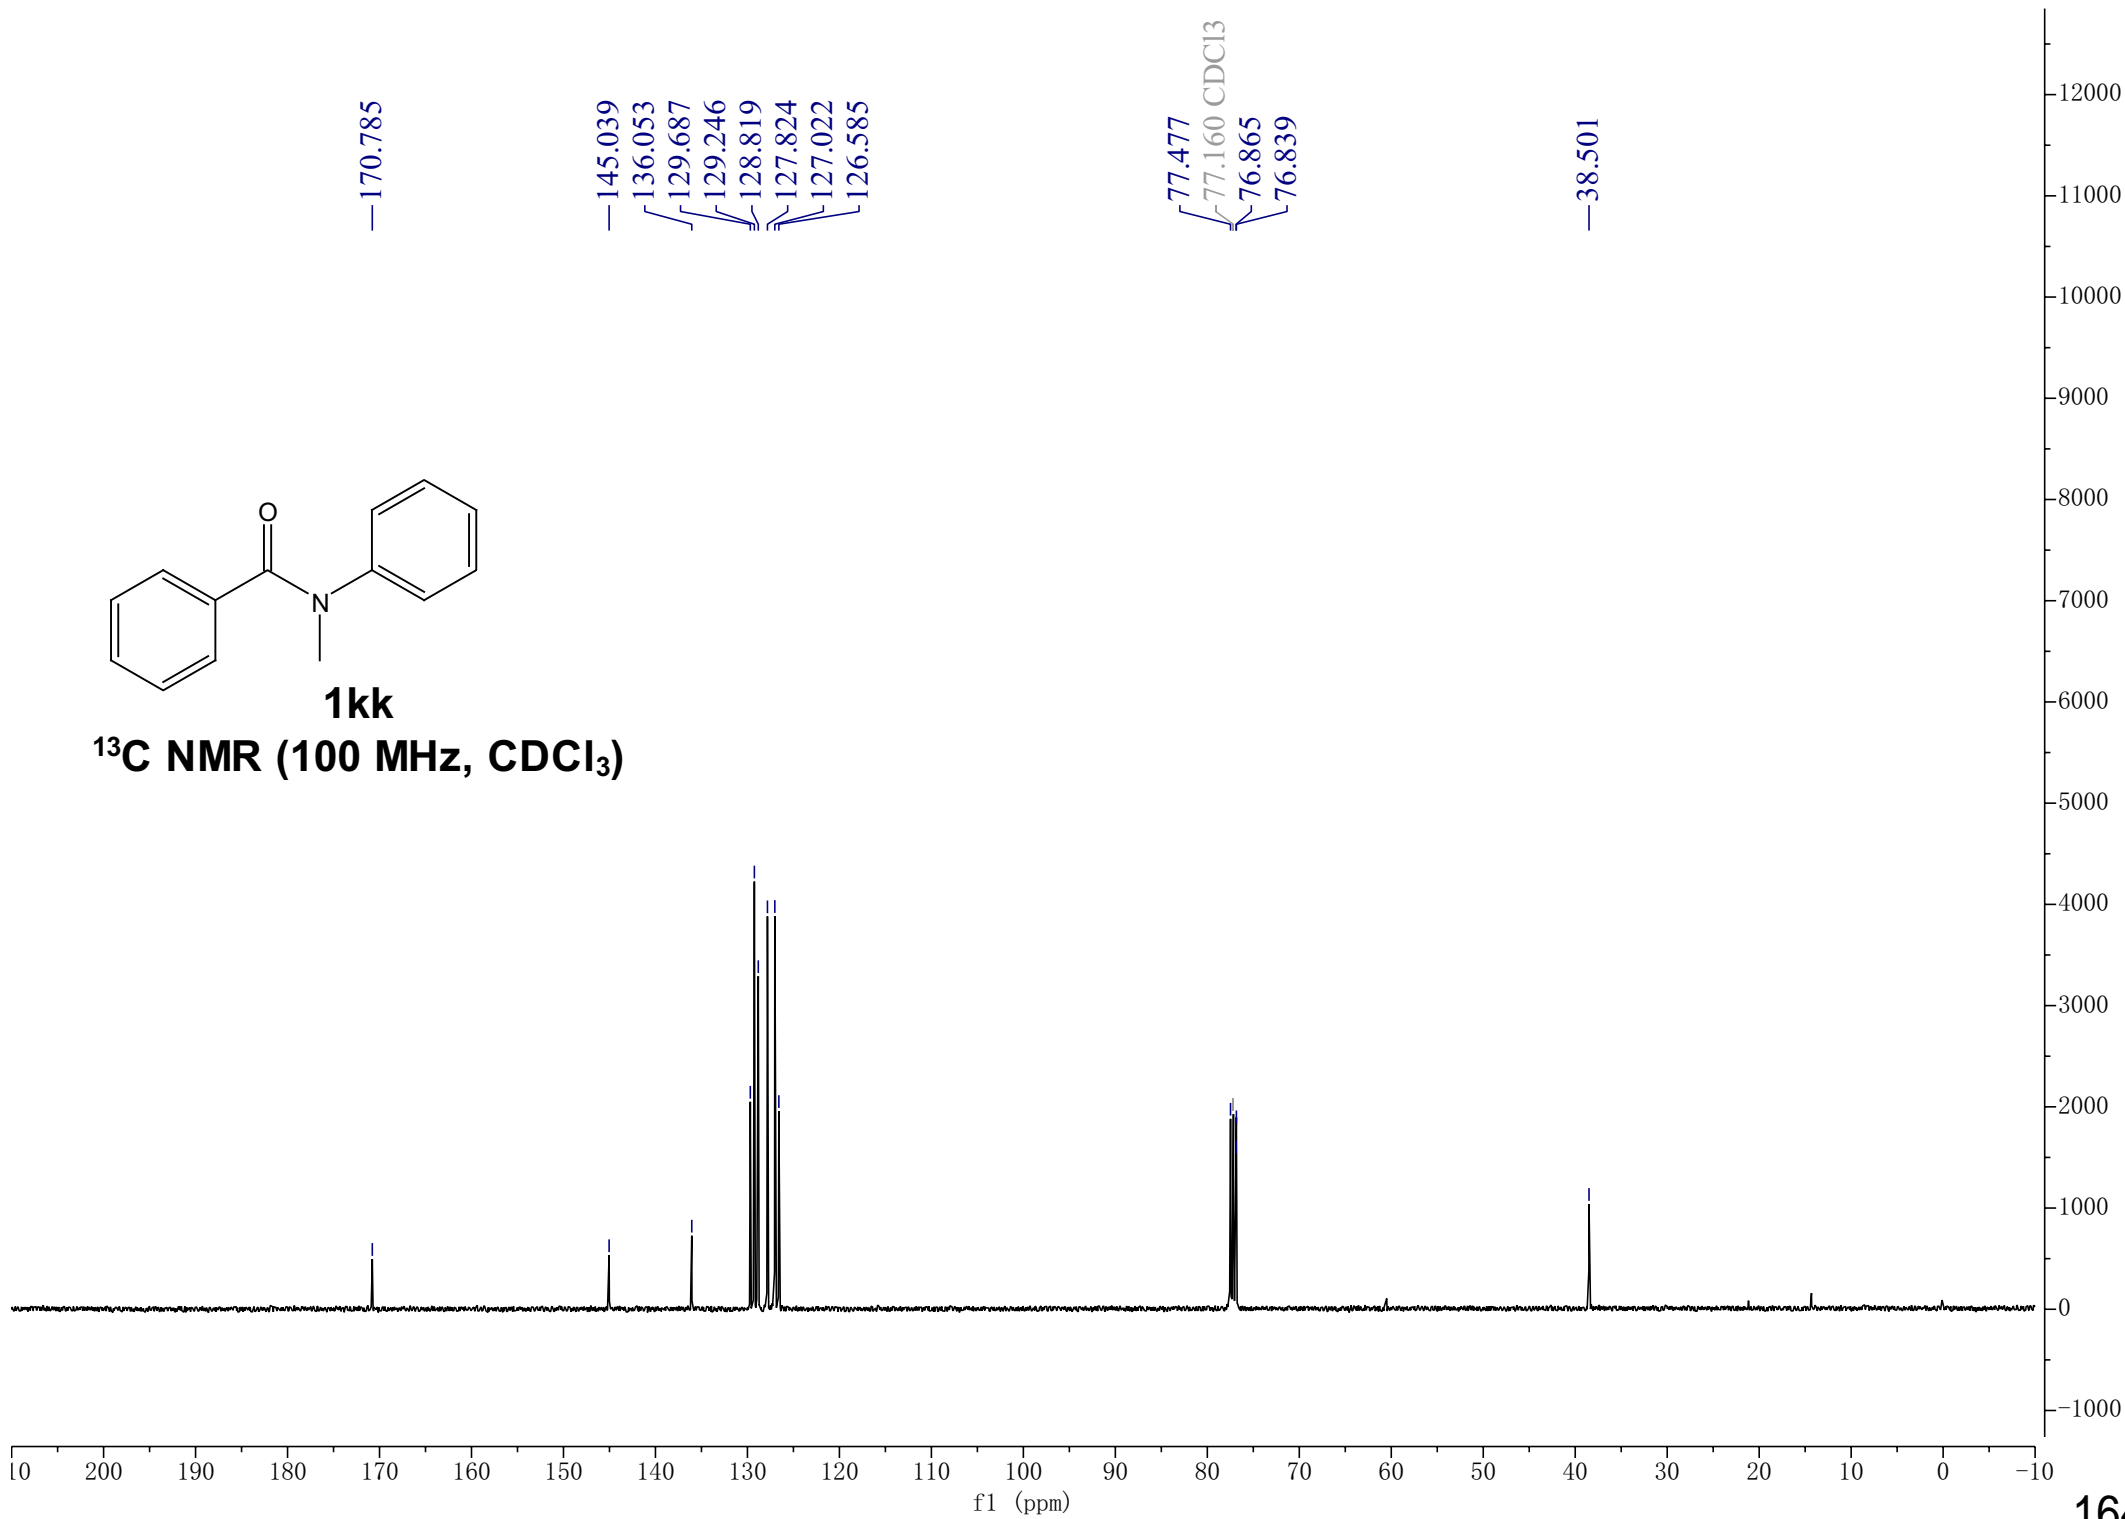

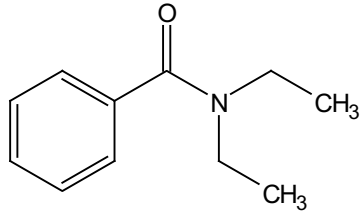

111

<sup>1</sup>H NMR (400 MHz, CDCl<sub>3</sub>)

7.363  
7.345  
7.340  
7.320  
7.260

3.507  
3.225

1.215  
1.073

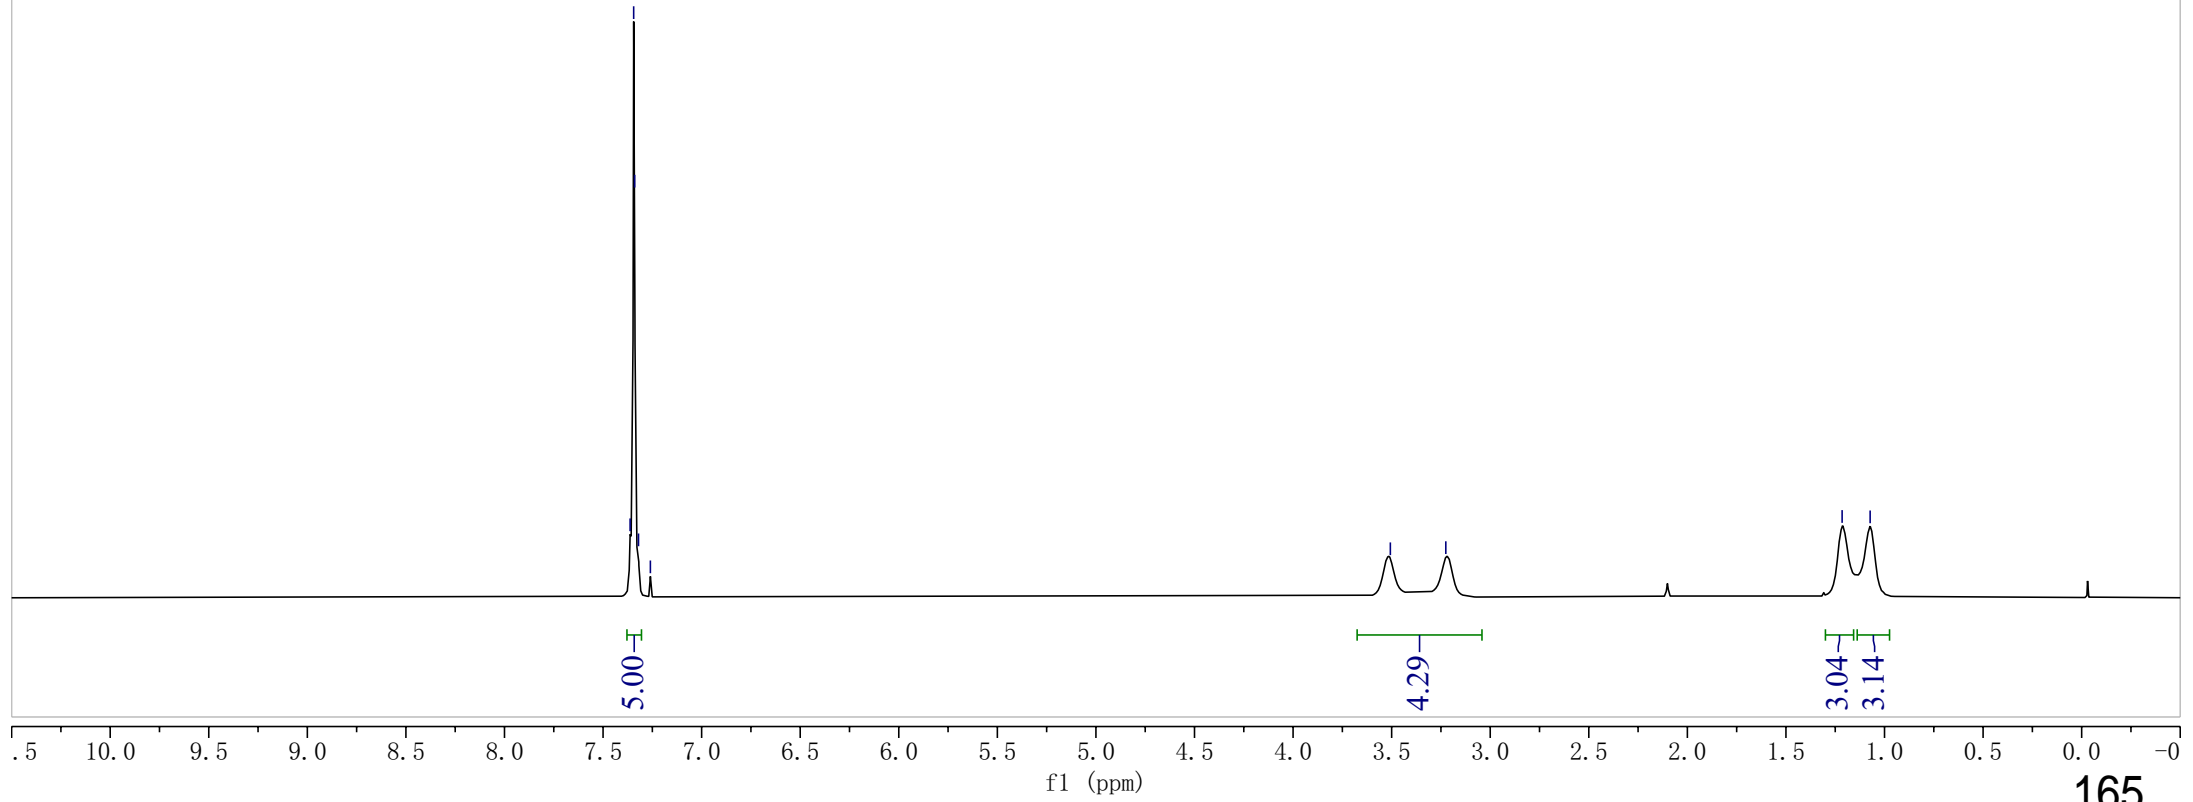

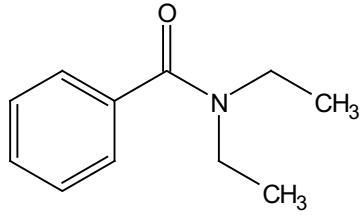

1III

<sup>13</sup>C NMR (100 MHz, CDCl<sub>3</sub>)

171.299

137.334

129.093

128.405

126.282

77.479

77.160

76.841

43.293

39.240

14.229

12.941

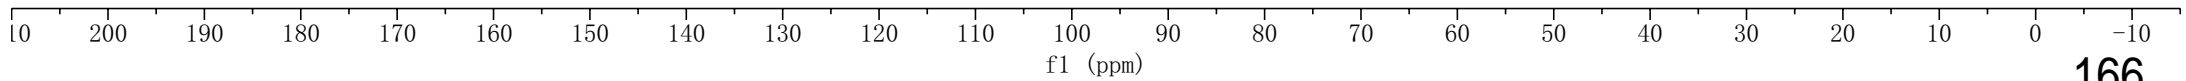

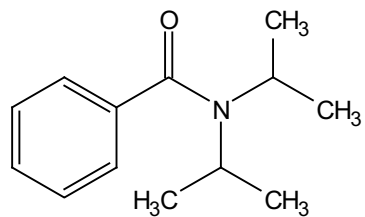

**1mm**  
**<sup>1</sup>H NMR (500 MHz, CDCl<sub>3</sub>)**

7.383  
7.380  
7.374  
7.370  
7.363  
7.359  
7.354  
7.350  
7.313  
7.307  
7.303  
7.297  
7.293  
7.260

3.817  
3.531

1.517  
1.160

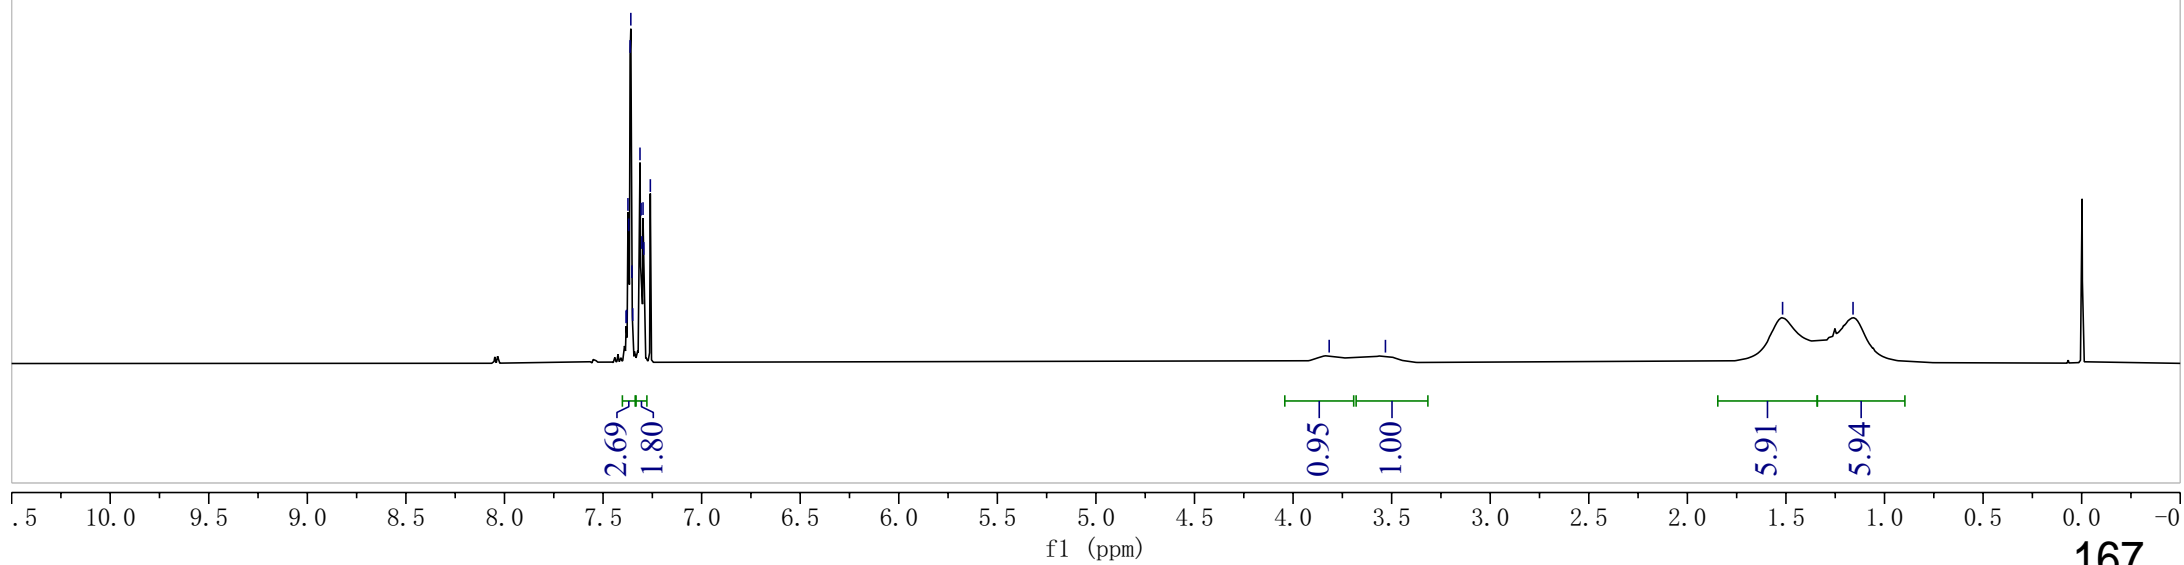





1mm

<sup>13</sup>C NMR (125 MHz, CDCl<sub>3</sub>)

—171.184

—139.096

—128.735

—128.573

—125.727

—77.414

—77.161

—76.906

—50.940

—45.946

—20.869

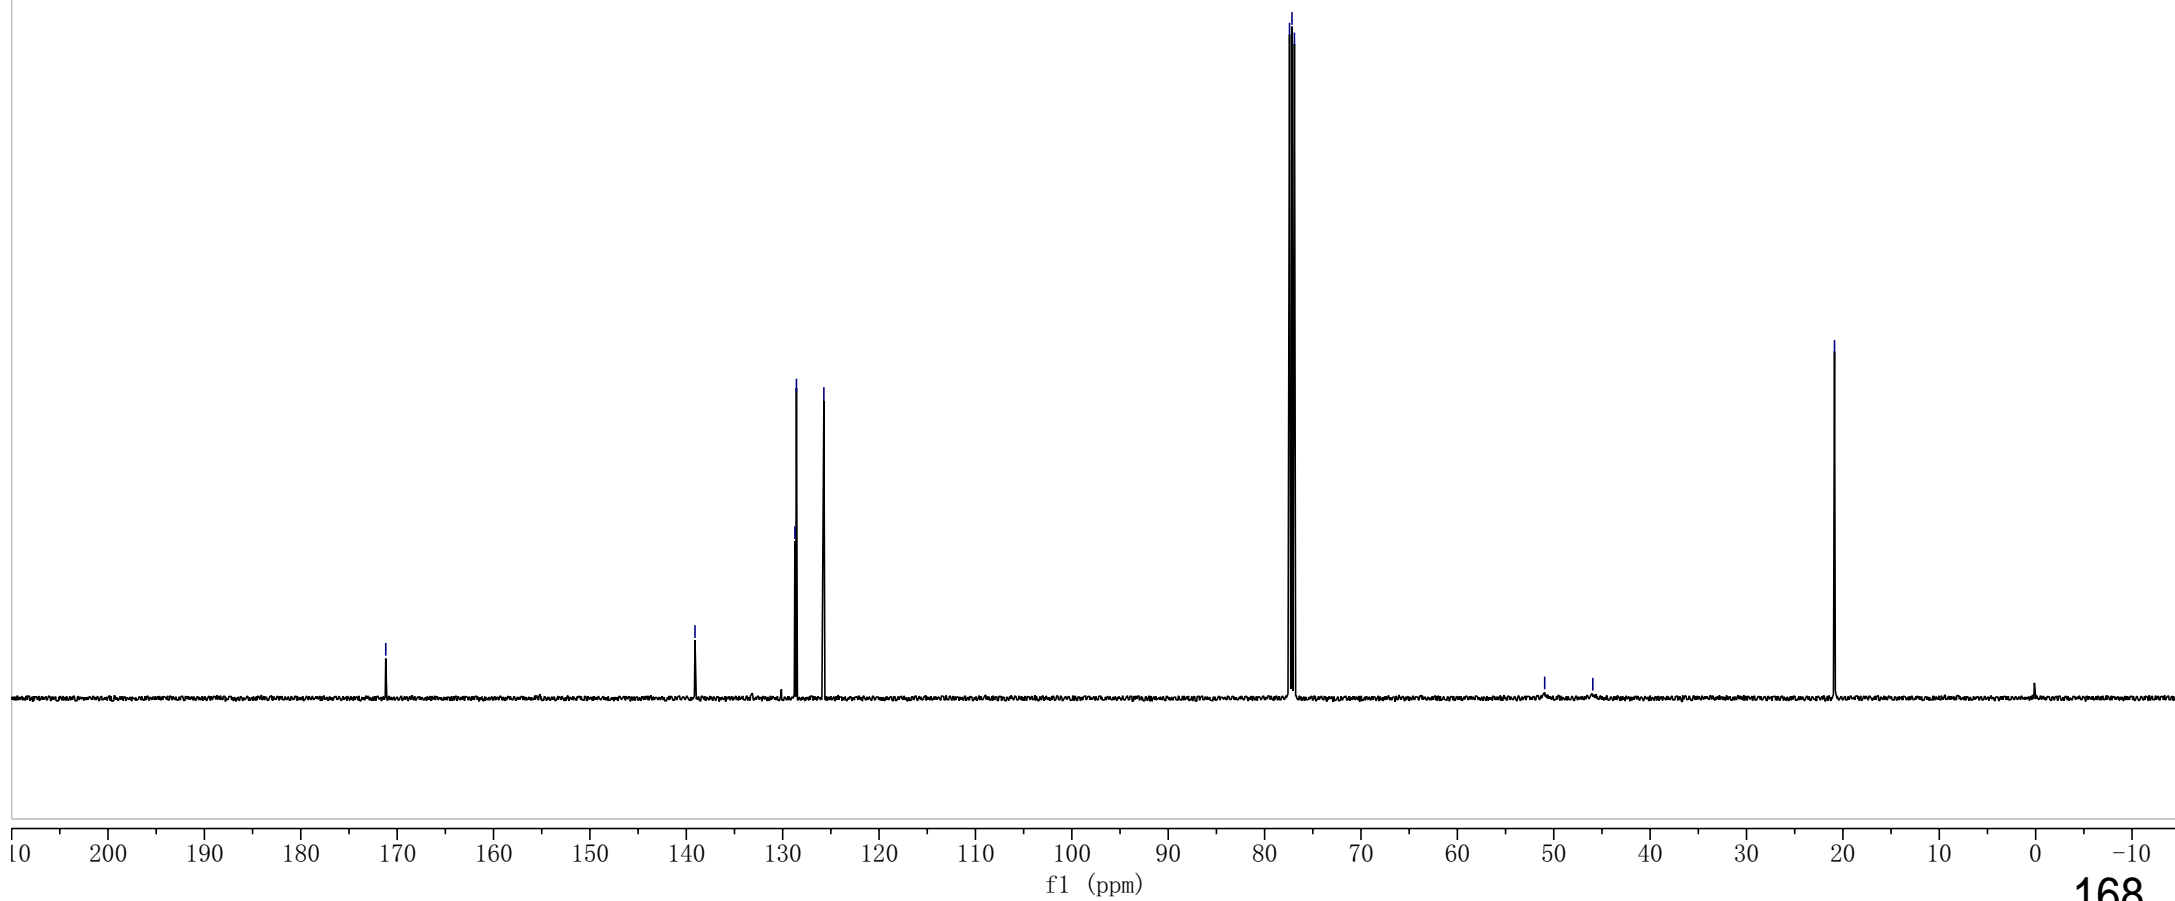

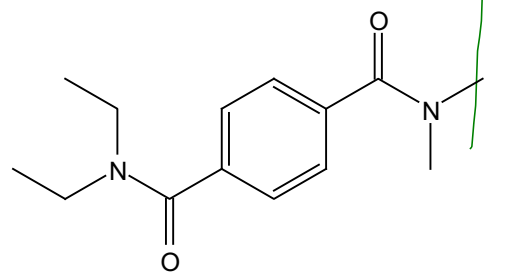

**1nn**

**<sup>1</sup>H NMR (500 MHz, CDCl<sub>3</sub>)**

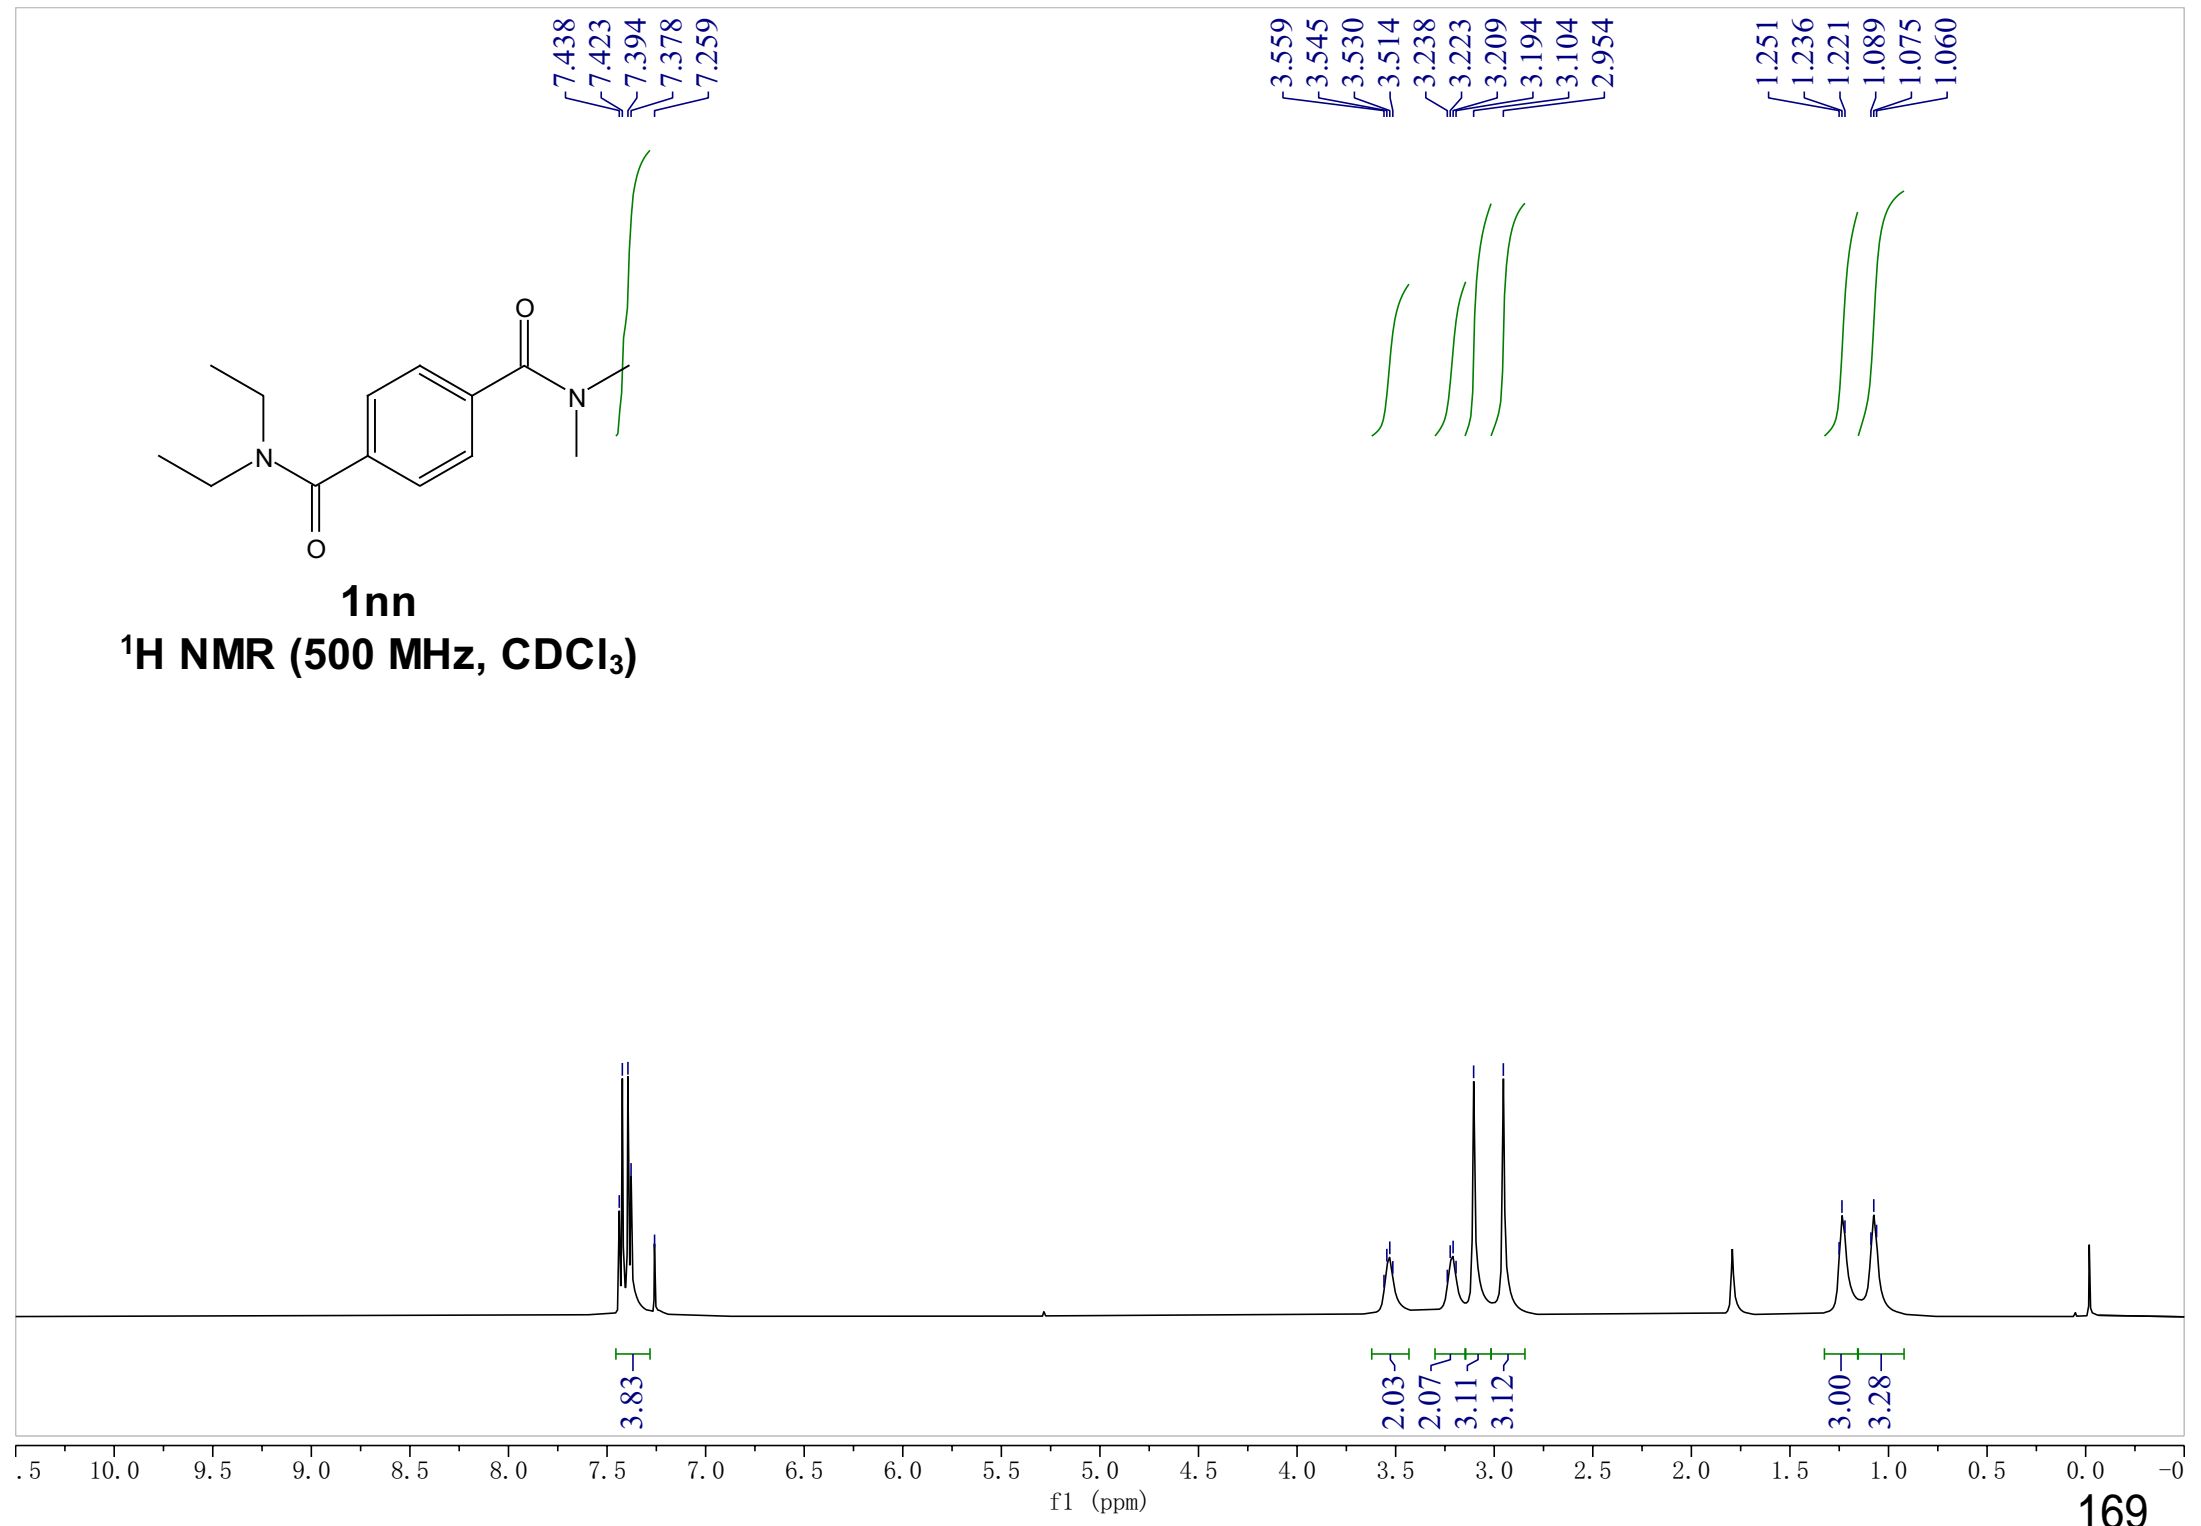

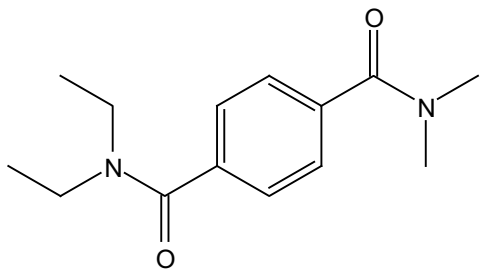

1nn

<sup>13</sup>C NMR (125 MHz, CDCl<sub>3</sub>)

171.085  
170.673

138.541  
137.204

127.294  
126.477

77.414  
77.159  
76.905

43.344  
39.626  
39.387  
35.457

14.301  
12.986

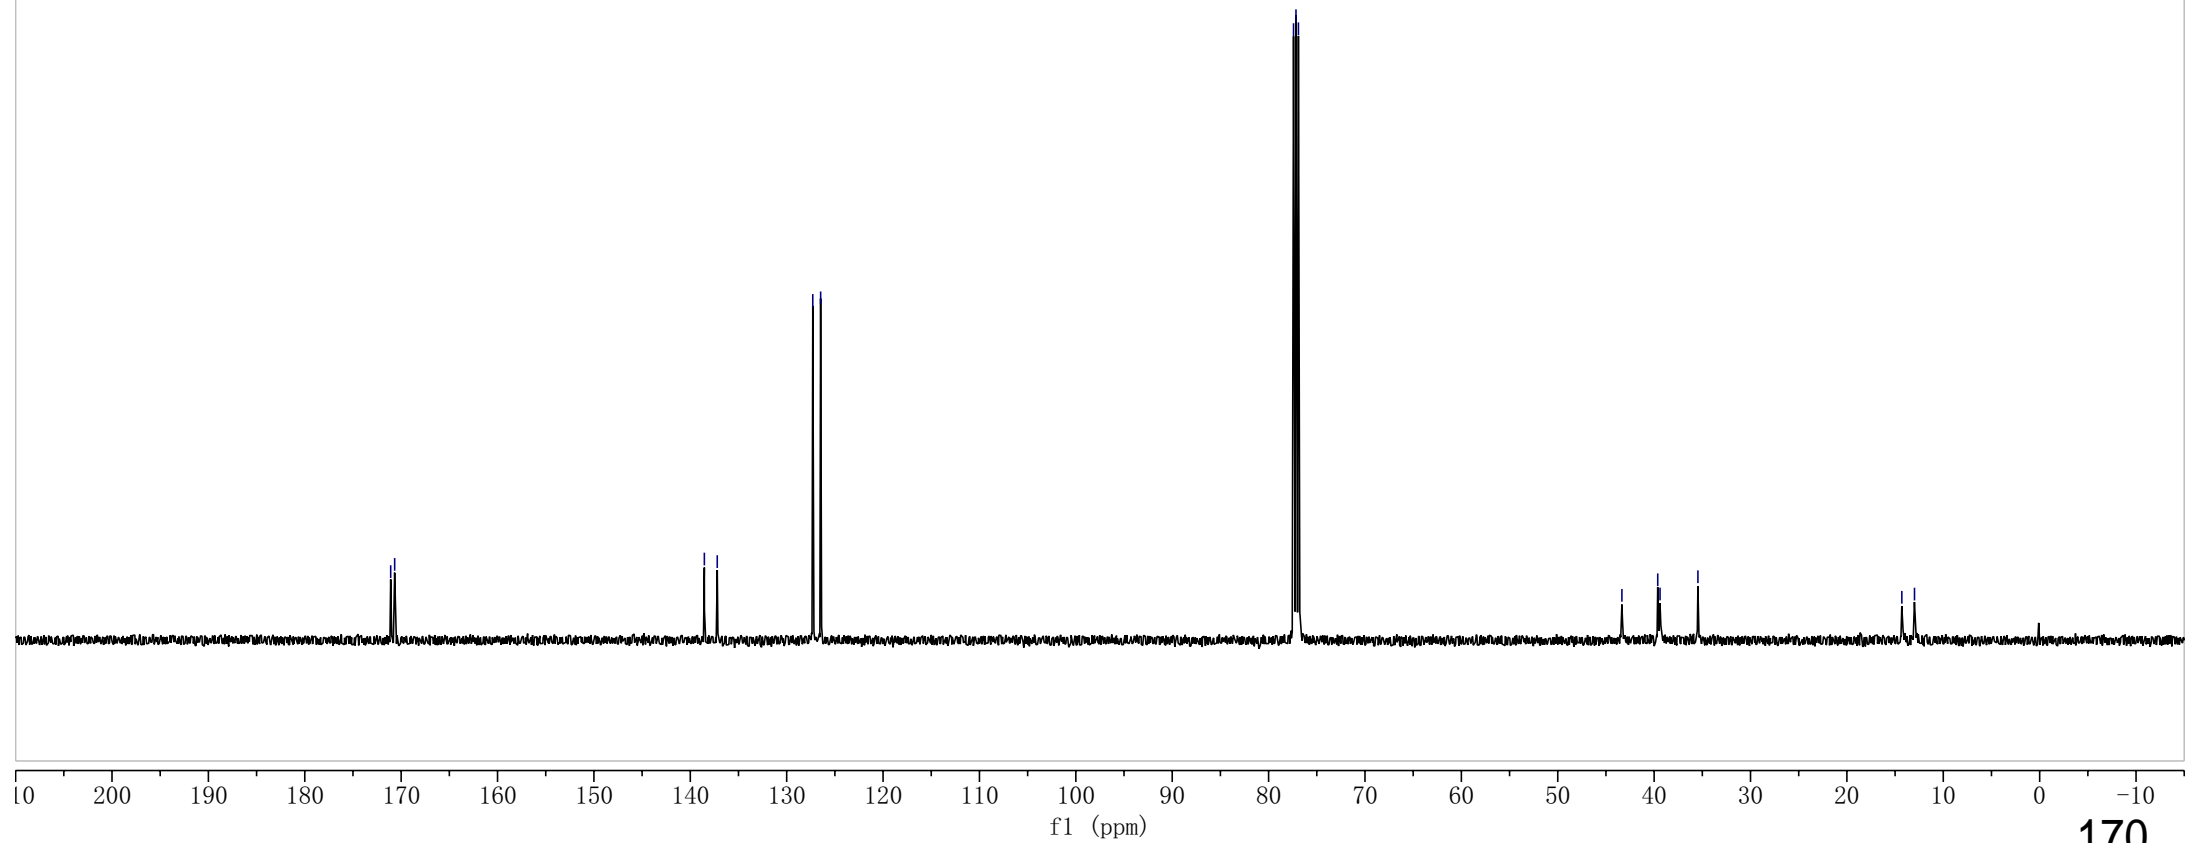

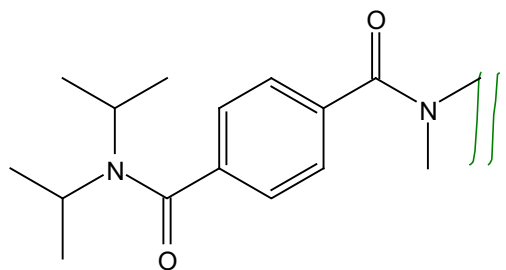

**100**

**<sup>1</sup>H NMR (500 MHz, CDCl<sub>3</sub>)**

7.428  
7.412  
7.338  
7.322  
7.260

3.797  
3.513  
3.112  
2.965

1.528  
1.117

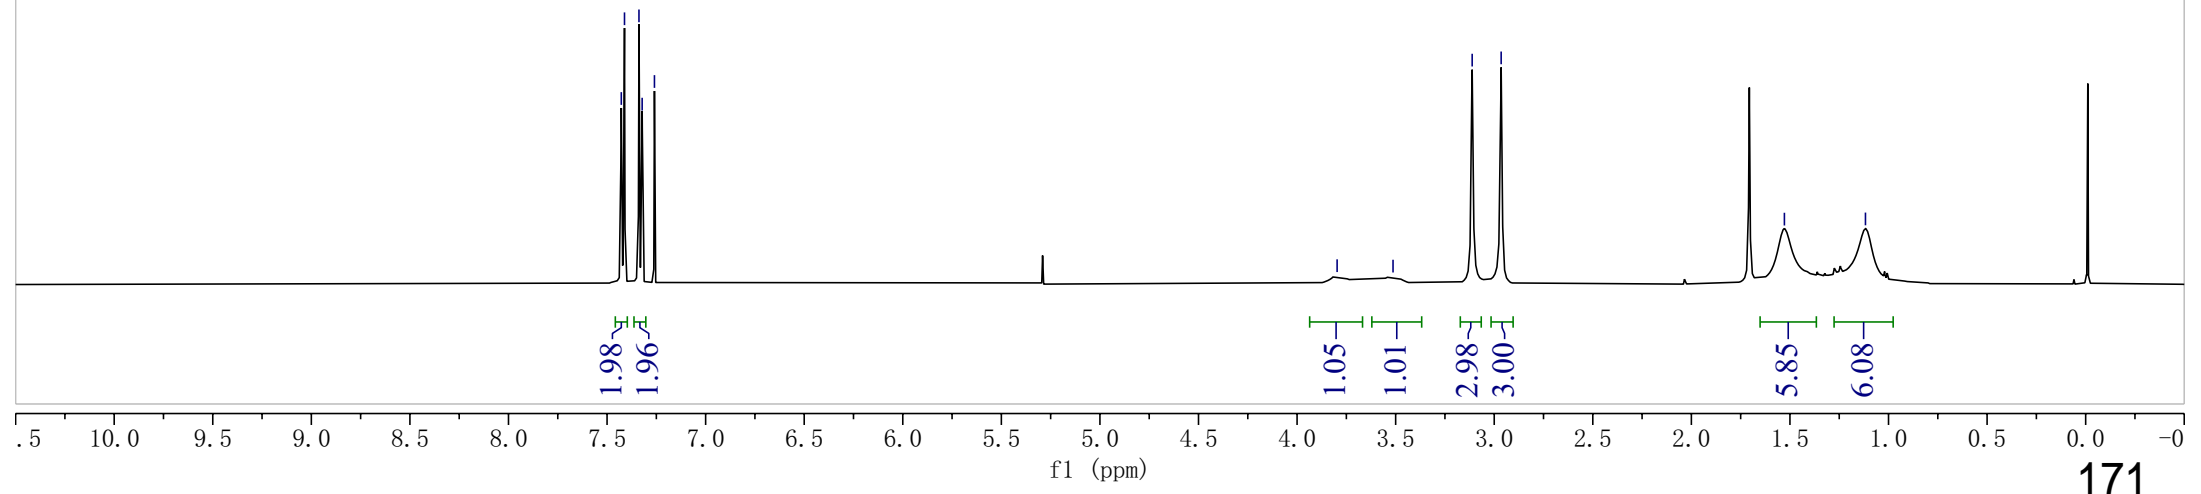

1.98  
1.96

1.05  
1.01  
2.98  
3.00

5.85  
6.08

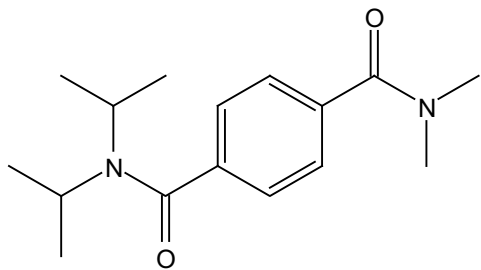

100

<sup>13</sup>C NMR (125 MHz, CDCl<sub>3</sub>)

171.228  
170.399

140.141  
136.774

127.346  
125.797

77.414  
77.161  
76.906

51.088  
46.060  
39.673  
35.469

20.777

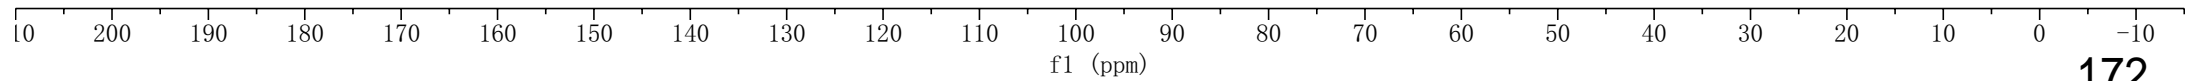

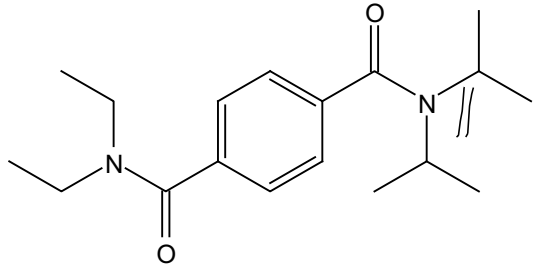

1pp

<sup>1</sup>H NMR (500 MHz, CDCl<sub>3</sub>)

7.379  
7.376  
7.367  
7.363  
7.331  
7.327  
7.318  
7.315  
7.260 CDCl<sub>3</sub>

3.807  
3.562  
3.549  
3.535  
3.480  
3.234  
3.229  
3.220  
3.206

1.526  
1.254  
1.240  
1.225  
1.110  
1.091  
1.077  
1.062

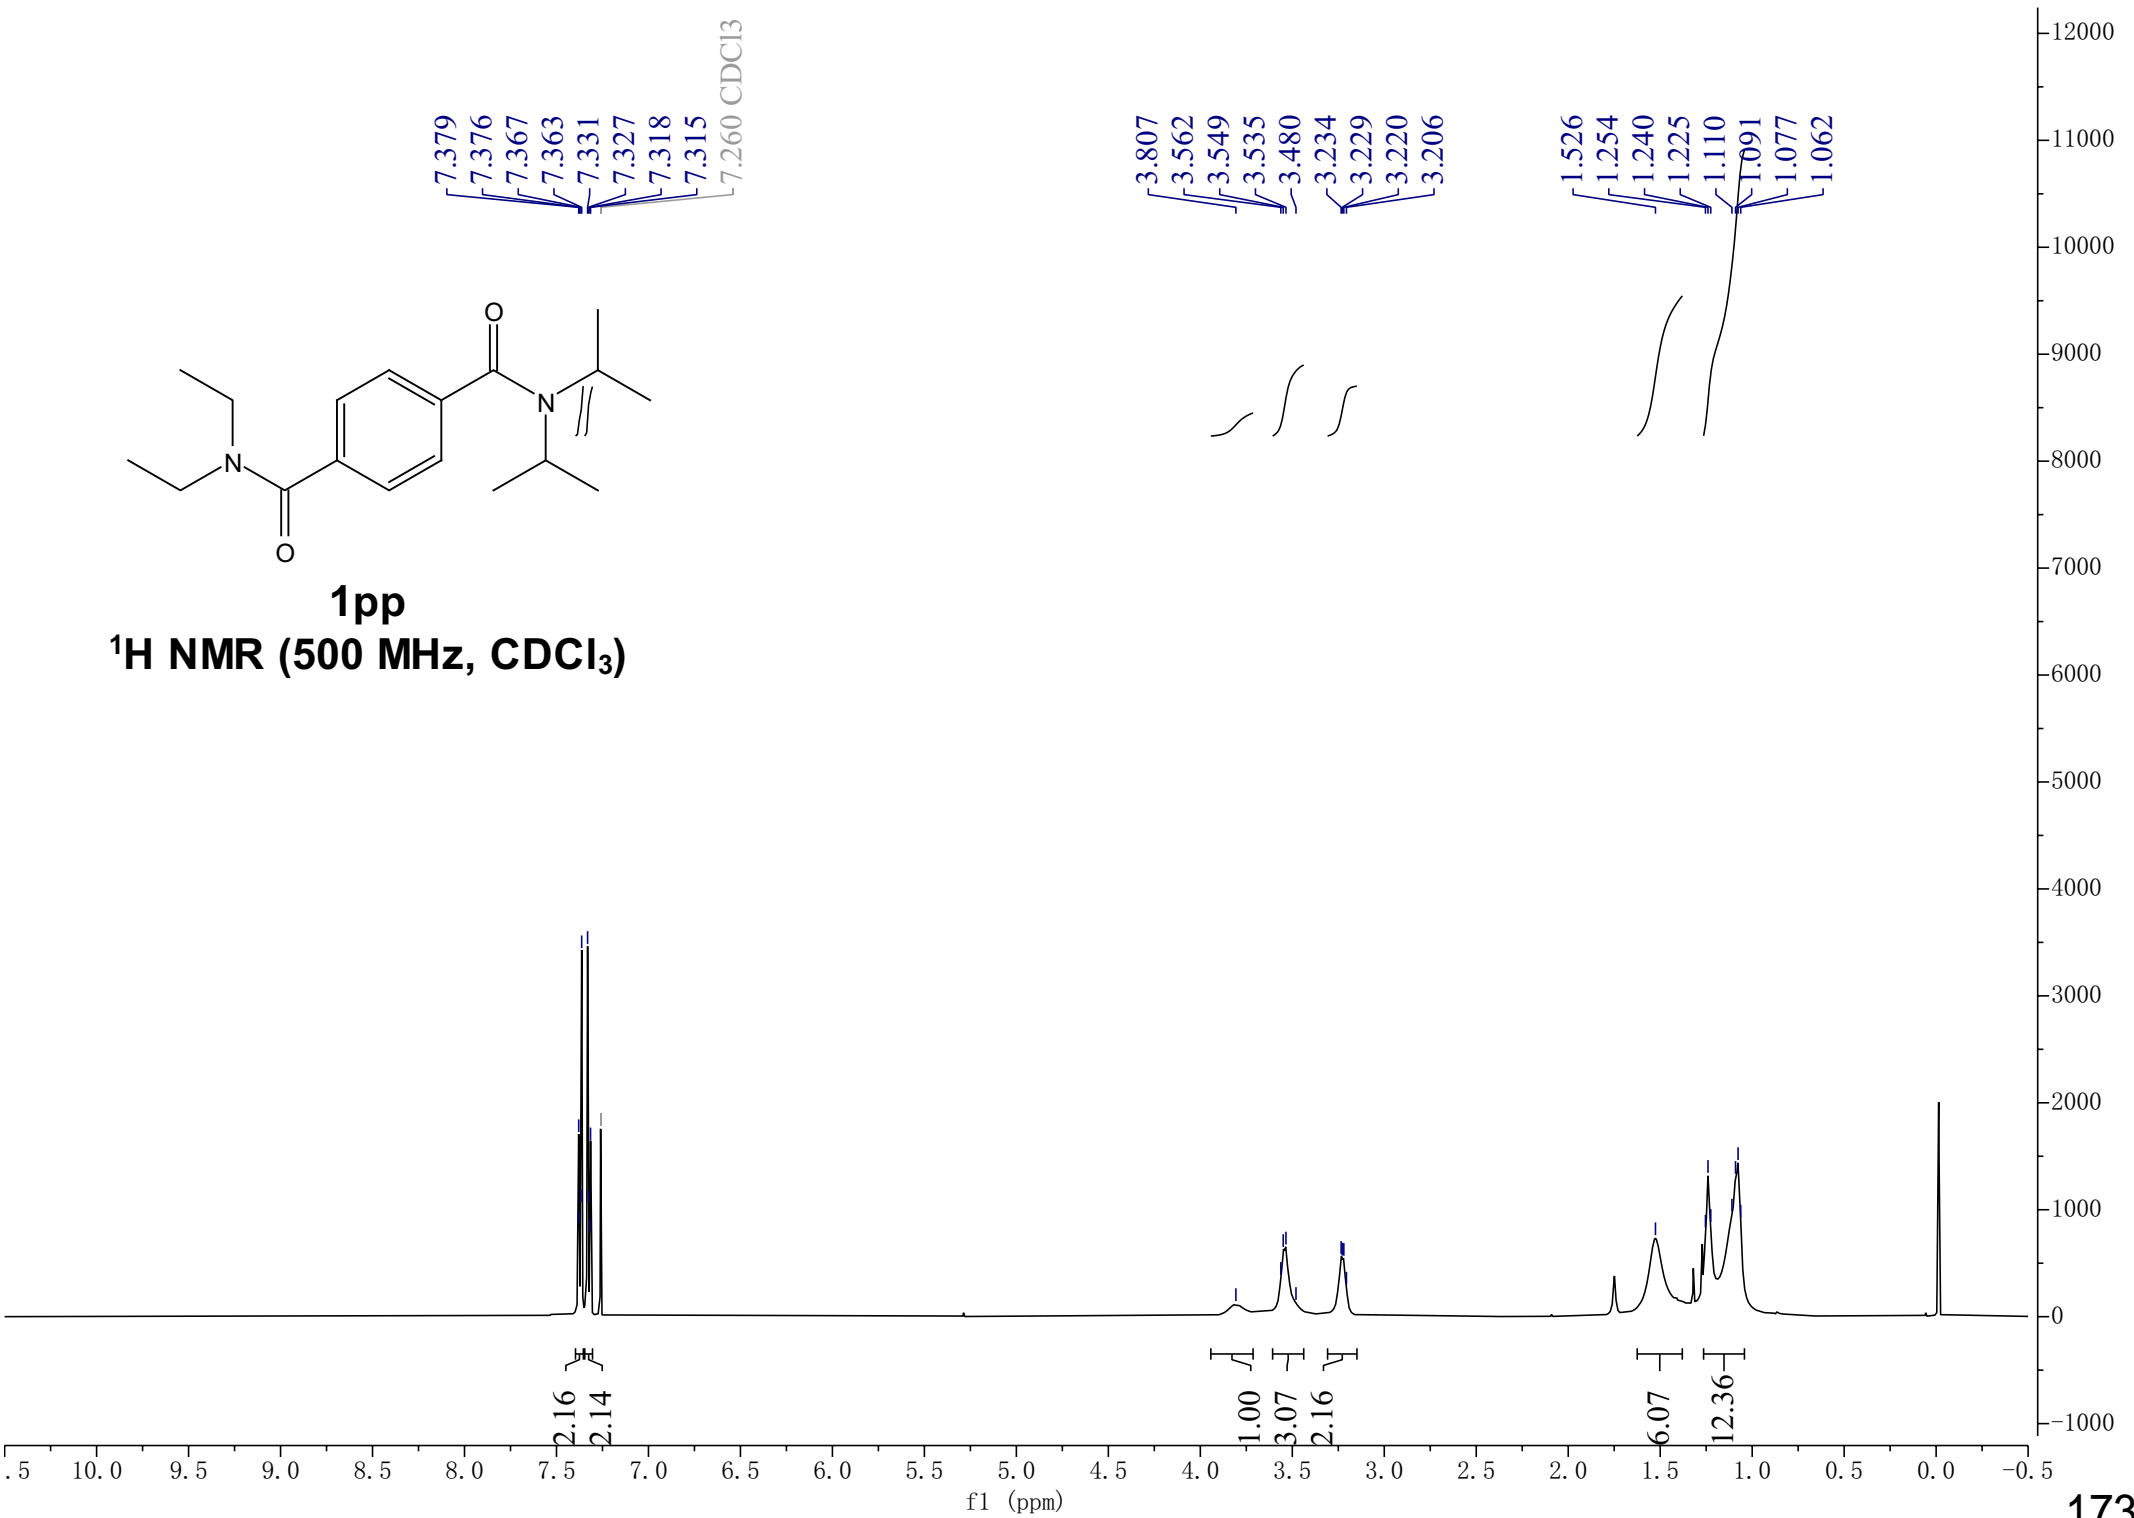

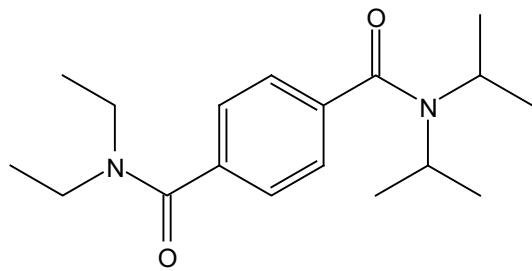

1pp

<sup>13</sup>C NMR (125 MHz, CDCl<sub>3</sub>)

170.904  
170.483

139.751  
137.707

126.578  
125.865

77.414  
77.160 CDCl<sub>3</sub>  
76.906

50.955  
46.105  
43.372  
39.362

20.765  
14.306  
13.009

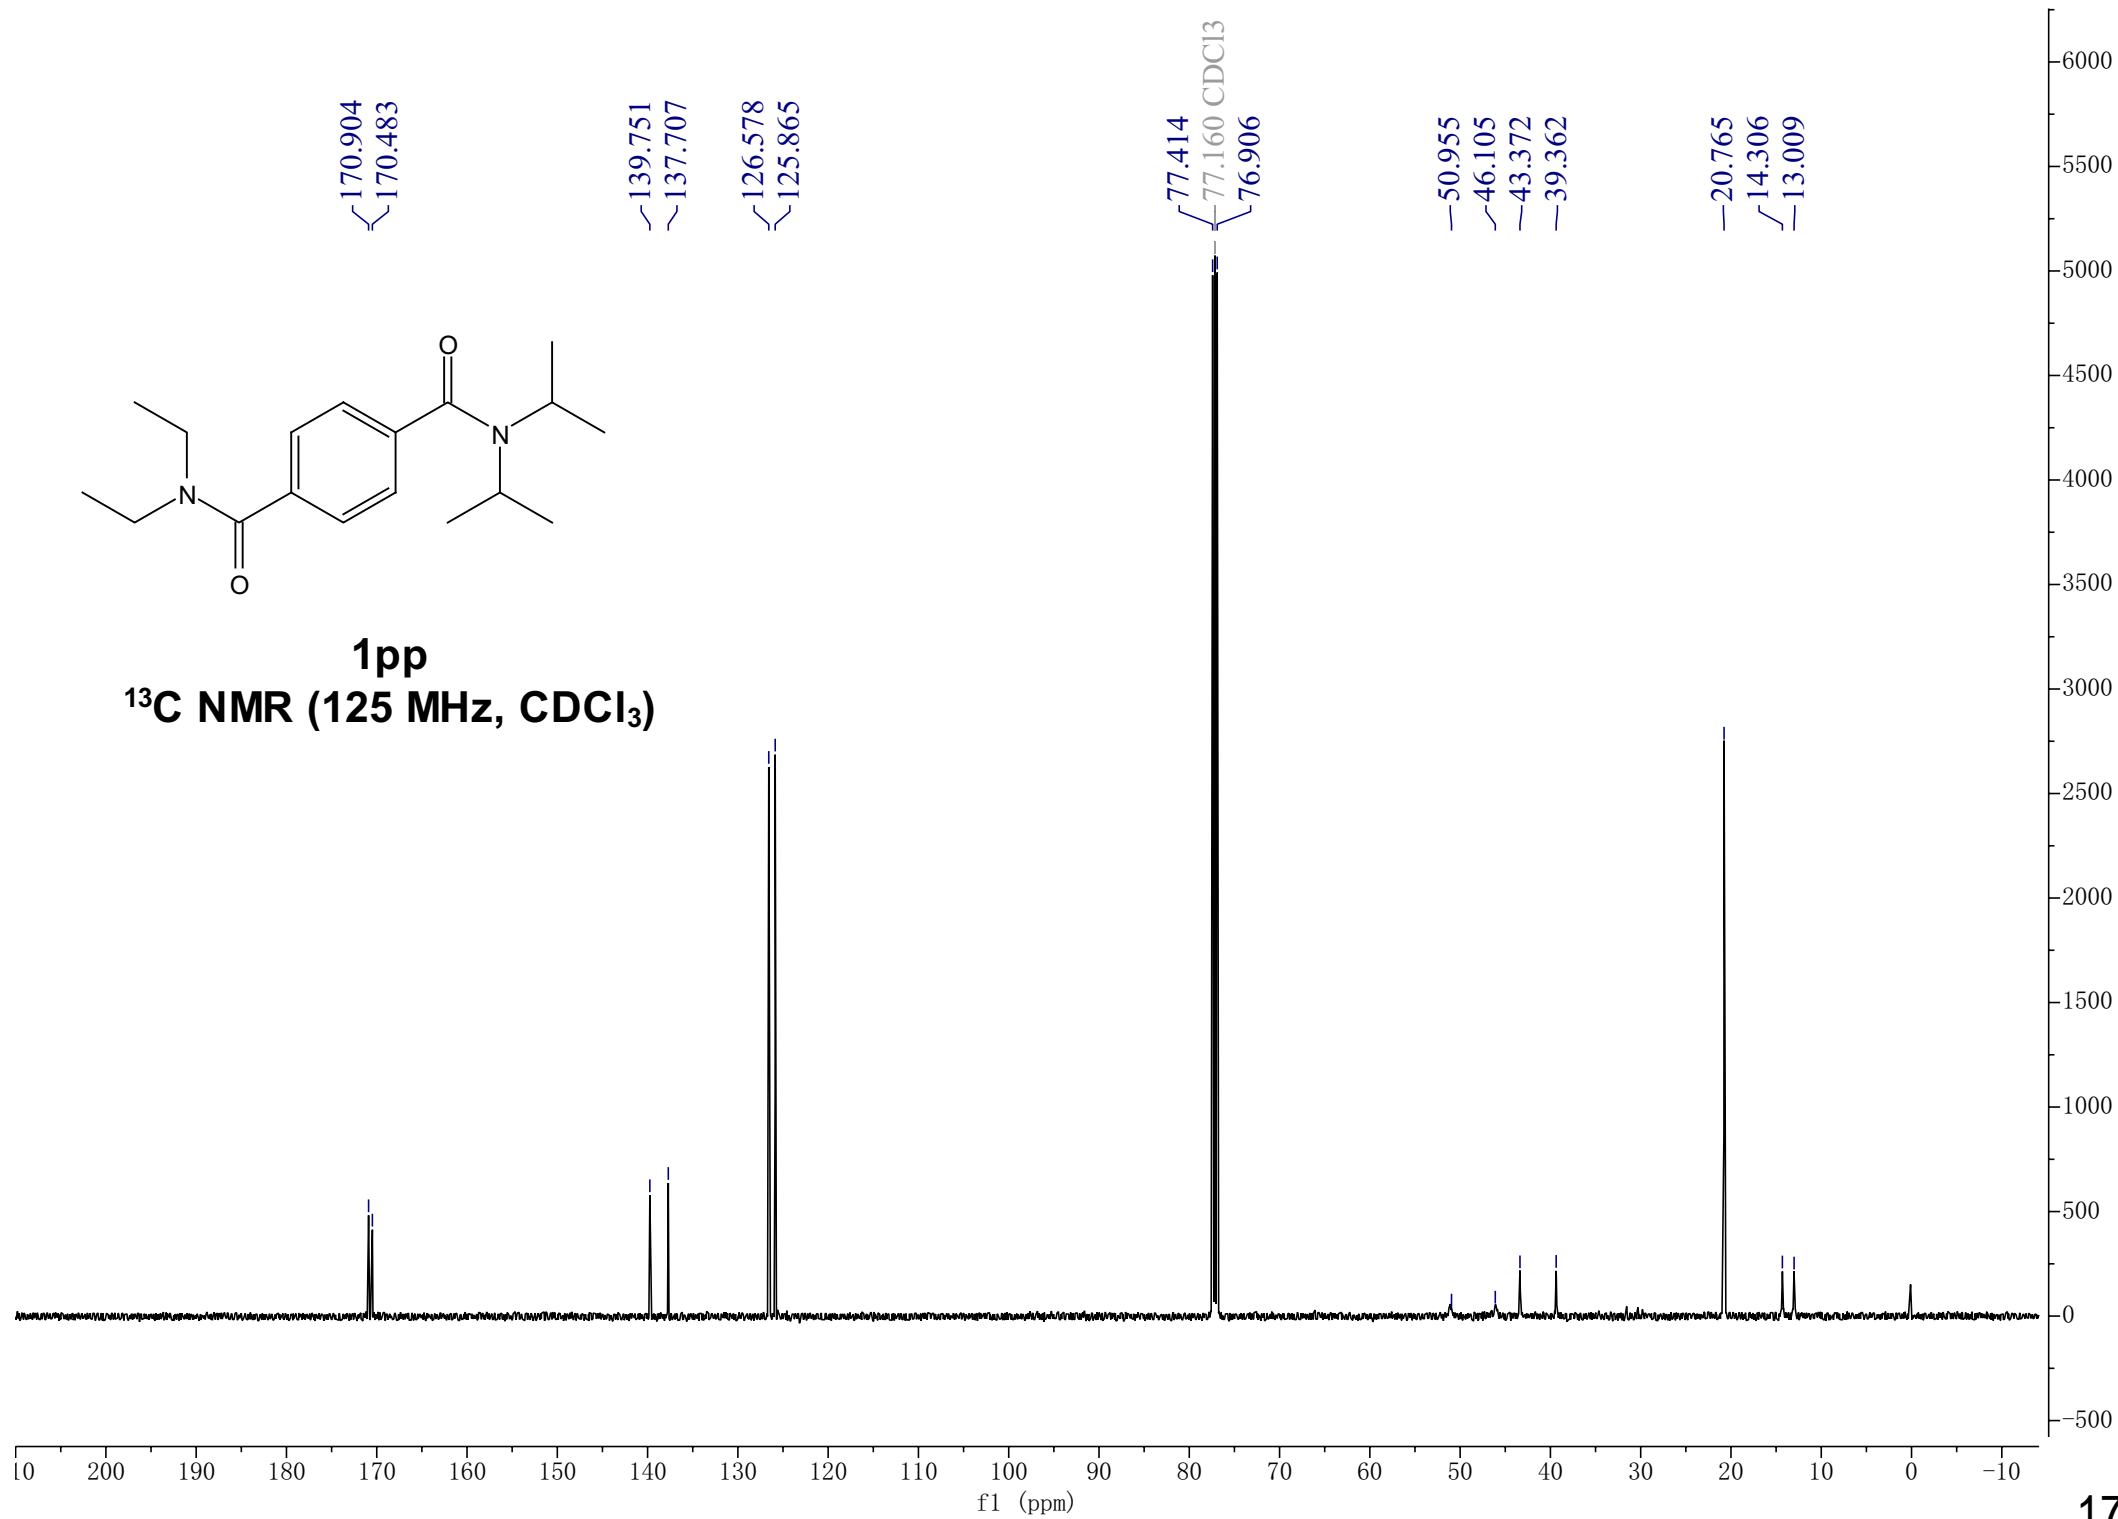

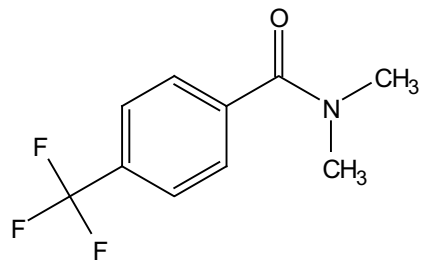

**1b**

**<sup>1</sup>H NMR (500 MHz, CDCl<sub>3</sub>)**

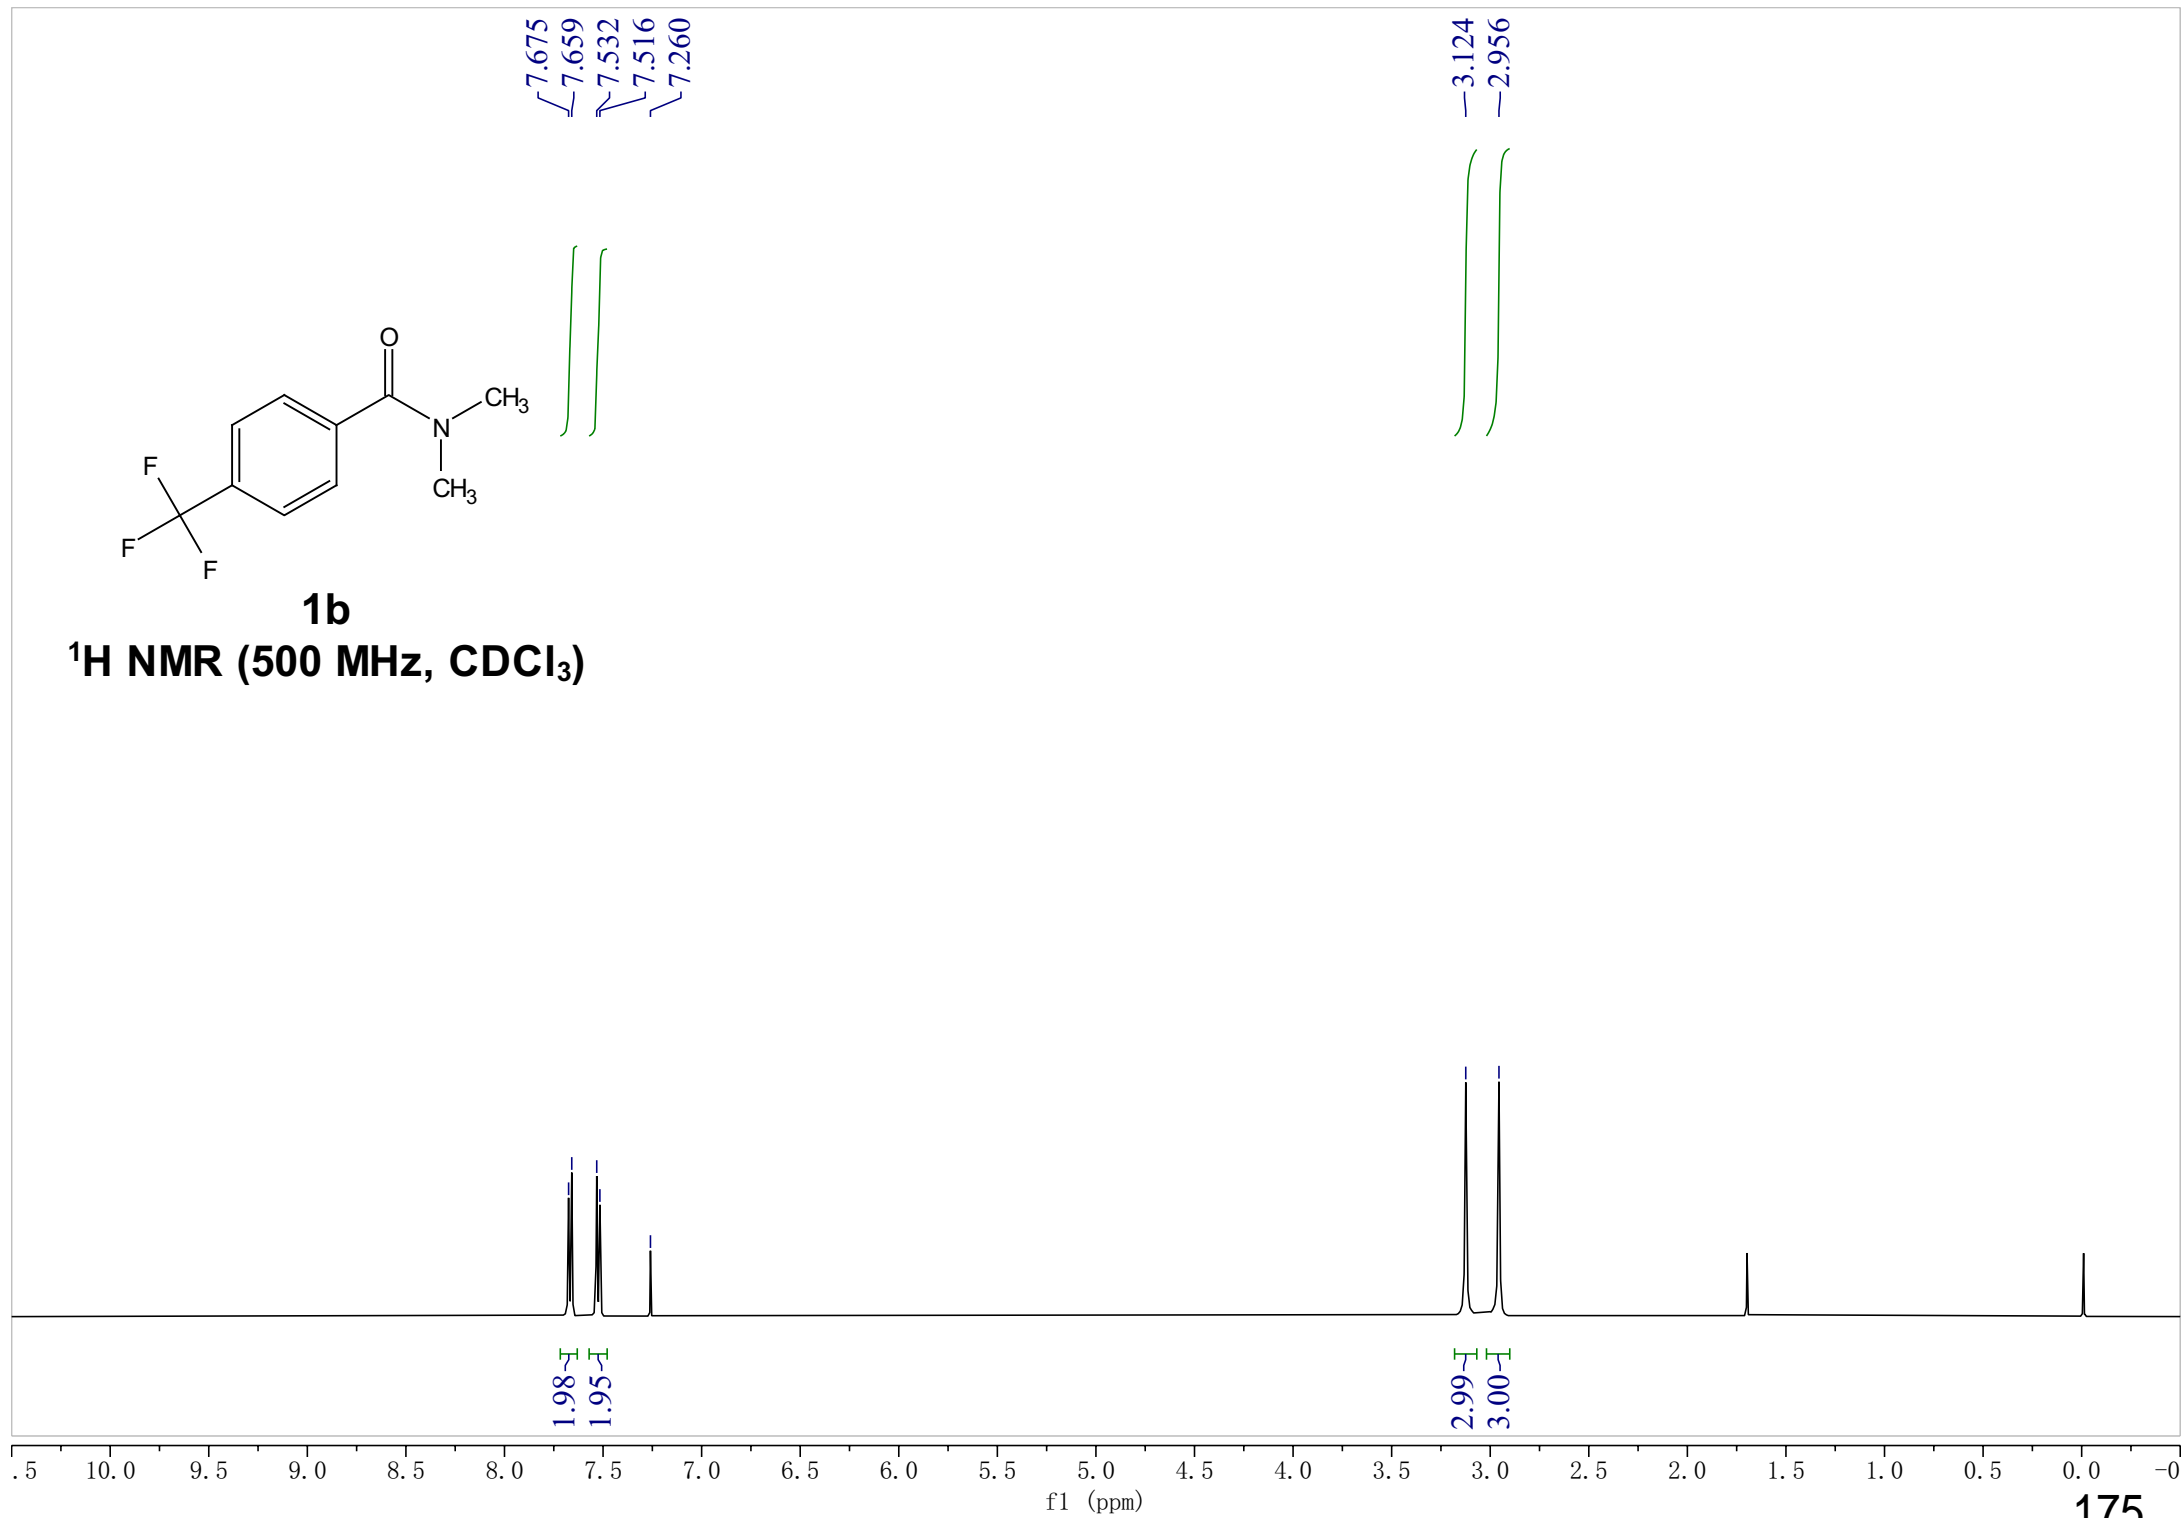



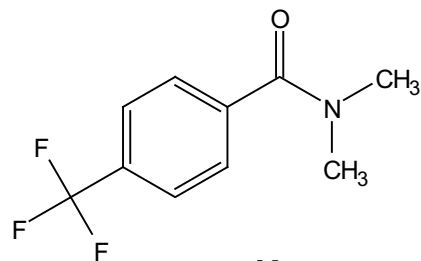

**1b**

**<sup>13</sup>C NMR (125 MHz, CDCl<sub>3</sub>)**

—170.266  
—140.031  
—132.008  
—131.749  
—131.489  
—131.229  
—127.533  
—127.132  
—125.660  
—125.630  
—125.601  
—125.570  
—124.966  
—122.802  
—120.636

—77.414  
—77.161  
—76.907

—39.526  
—35.450

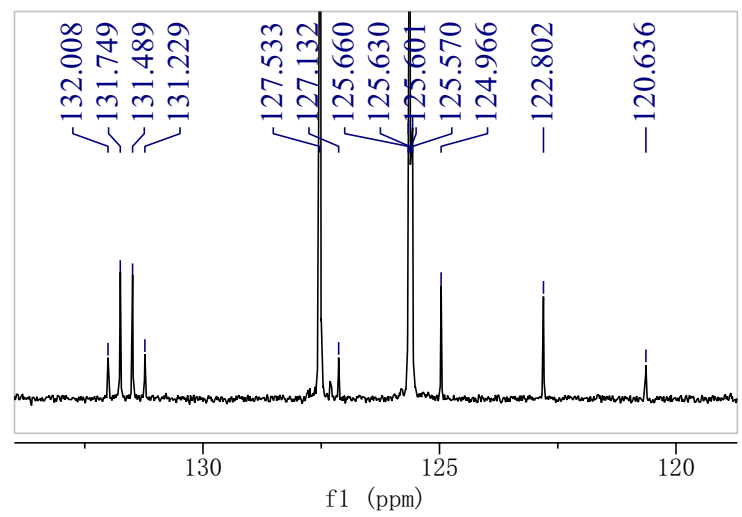

10 200 190 180 170 160 150 140 130 120 110 100 90 80 70 60 50 40 30 20 10 0 -10  
f1 (ppm)

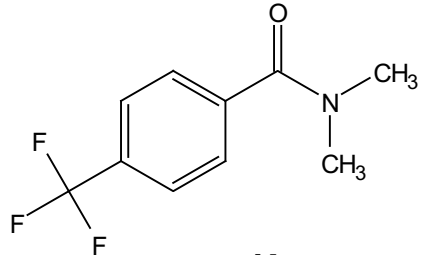

**1b**

**$^{19}\text{F}$  NMR (470 MHz,  $\text{CDCl}_3$ )**

---62.896

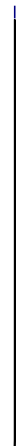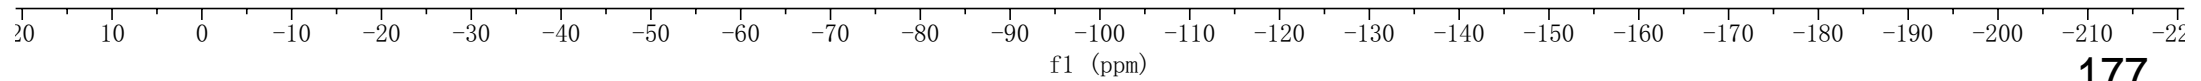

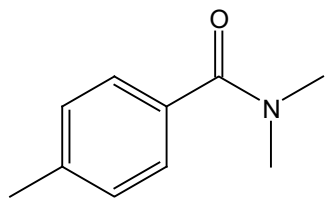

**1c**

**<sup>1</sup>H NMR (400 MHz, CDCl<sub>3</sub>)**

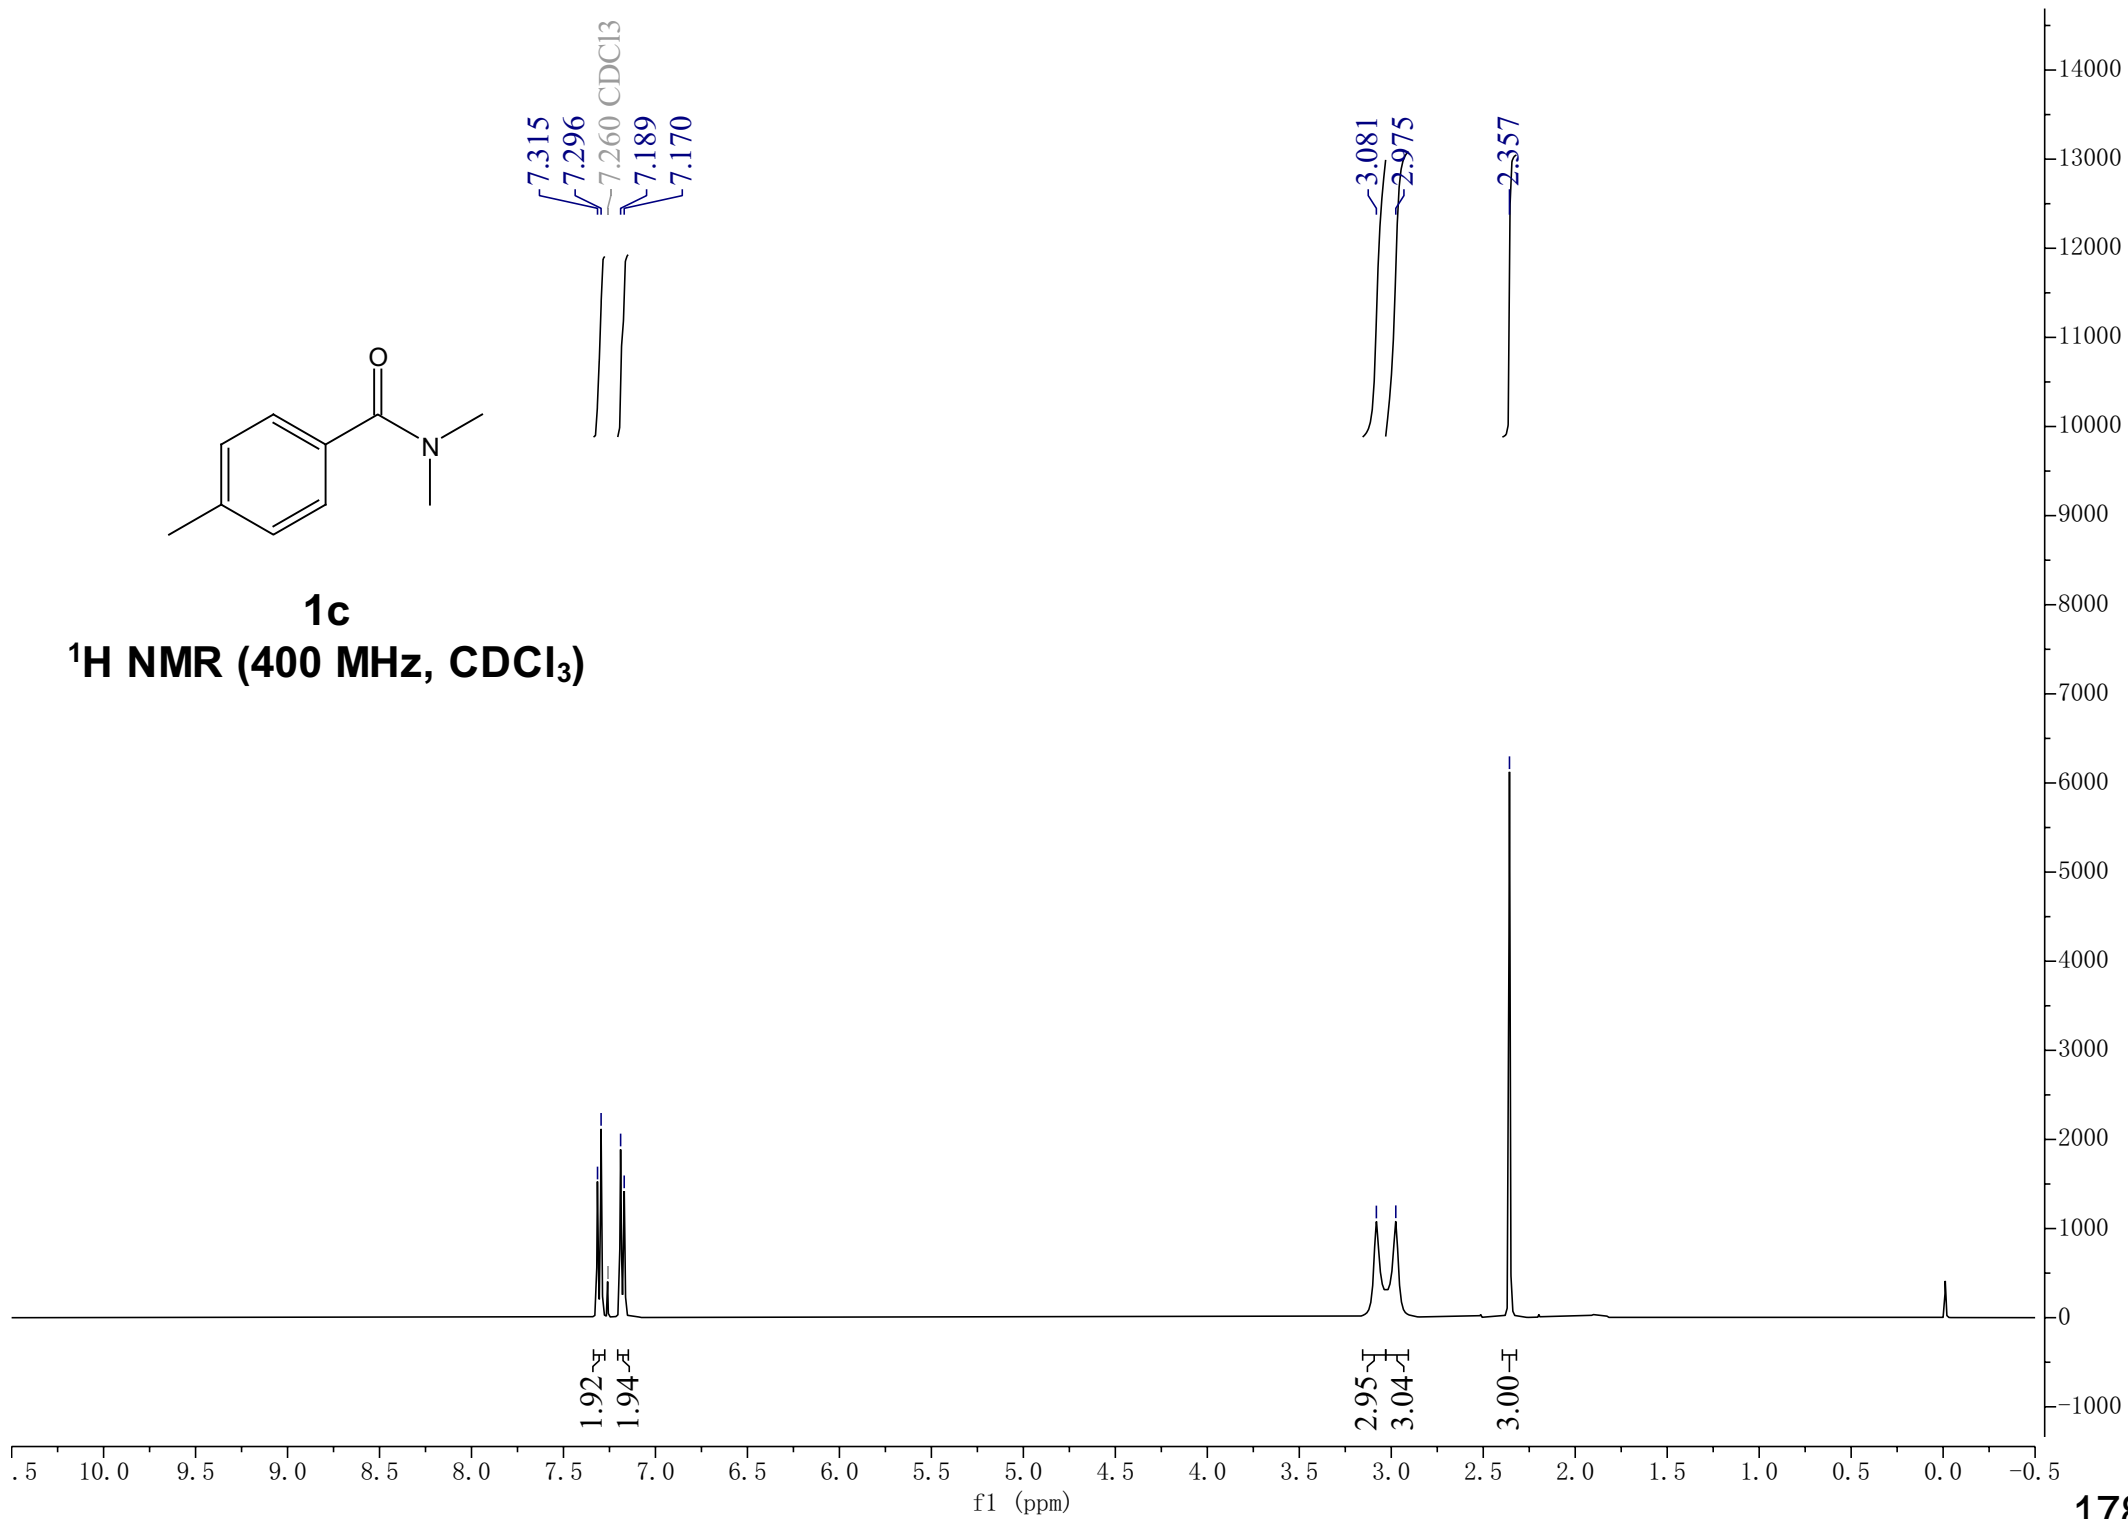

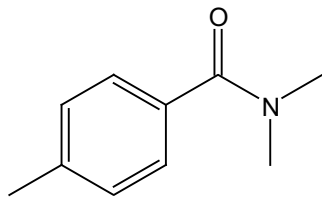

**1c**

**$^{13}\text{C}$  NMR (100 MHz,  $\text{CDCl}_3$ )**

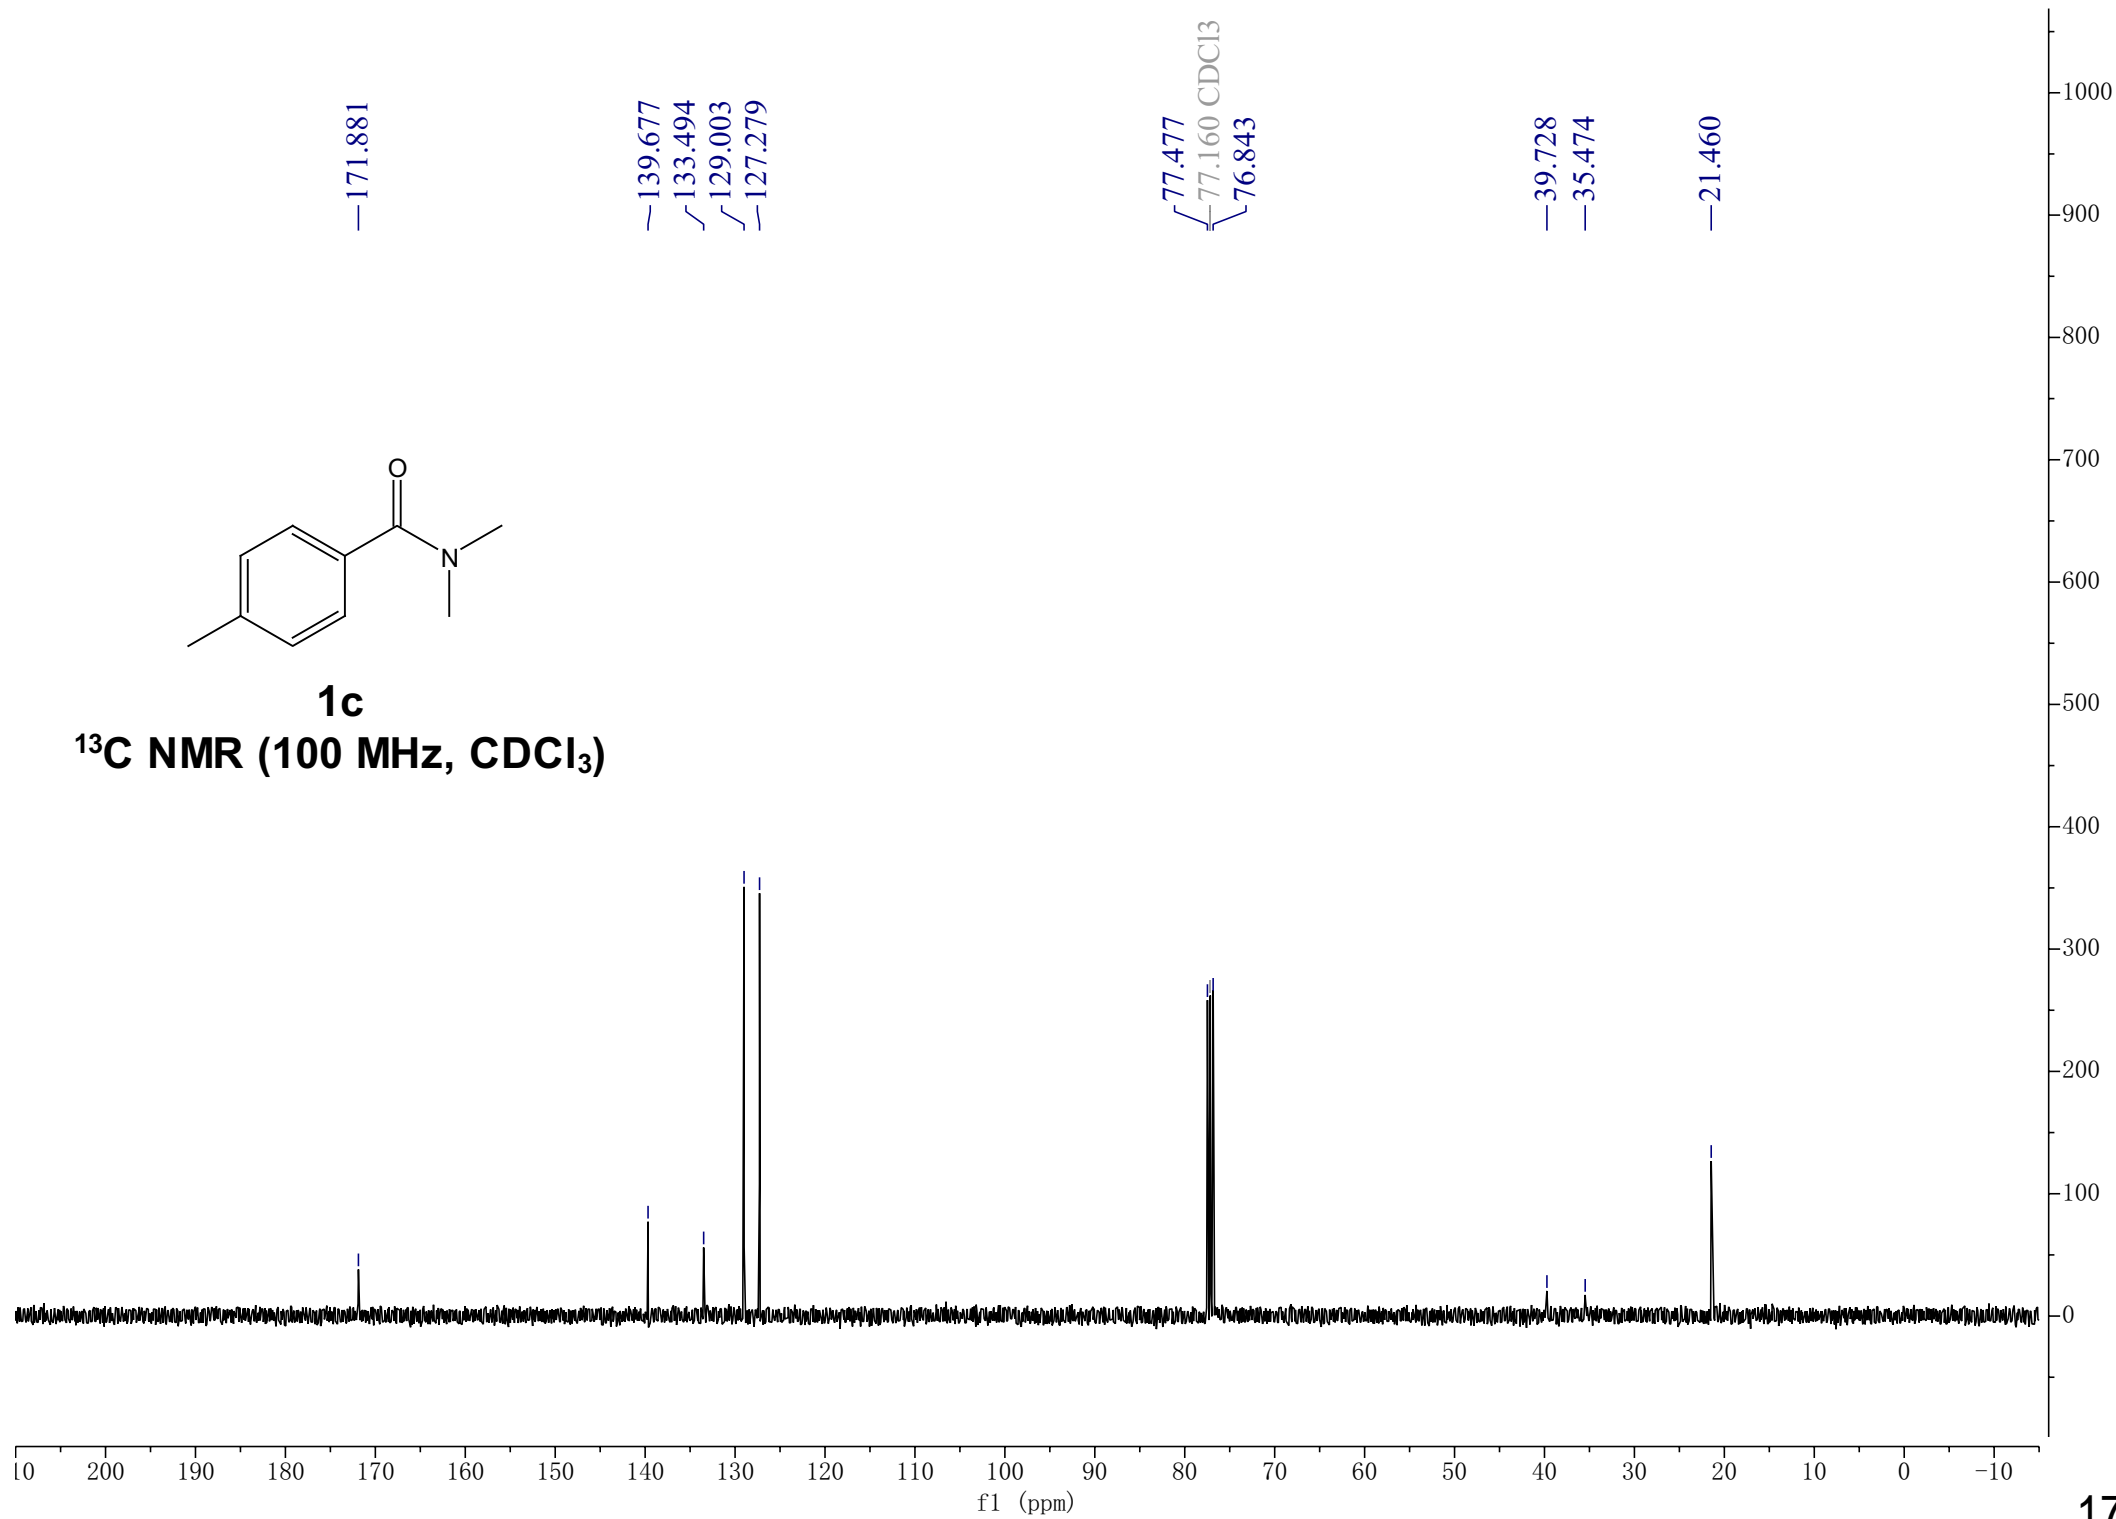

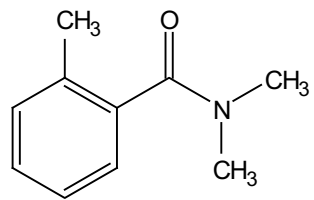

**1d**

**<sup>1</sup>H NMR (500 MHz, CDCl<sub>3</sub>)**

7.296  
7.292  
7.285  
7.281  
7.277  
7.266  
7.263  
7.231  
7.230  
7.228  
7.217  
7.216  
7.205  
7.188  
7.184  
7.172  
7.169

3.152  
2.846  
2.304

4.17

3.03

3.01

3.00

10.0 9.5 9.0 8.5 8.0 7.5 7.0 6.5 6.0 5.5 5.0 4.5 4.0 3.5 3.0 2.5 2.0 1.5 1.0 0.5 0.0 -0.5

f1 (ppm)

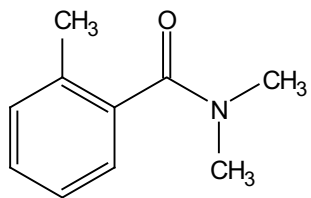

**1d**

**$^{13}\text{C}$  NMR (125 MHz,  $\text{CDCl}_3$ )**

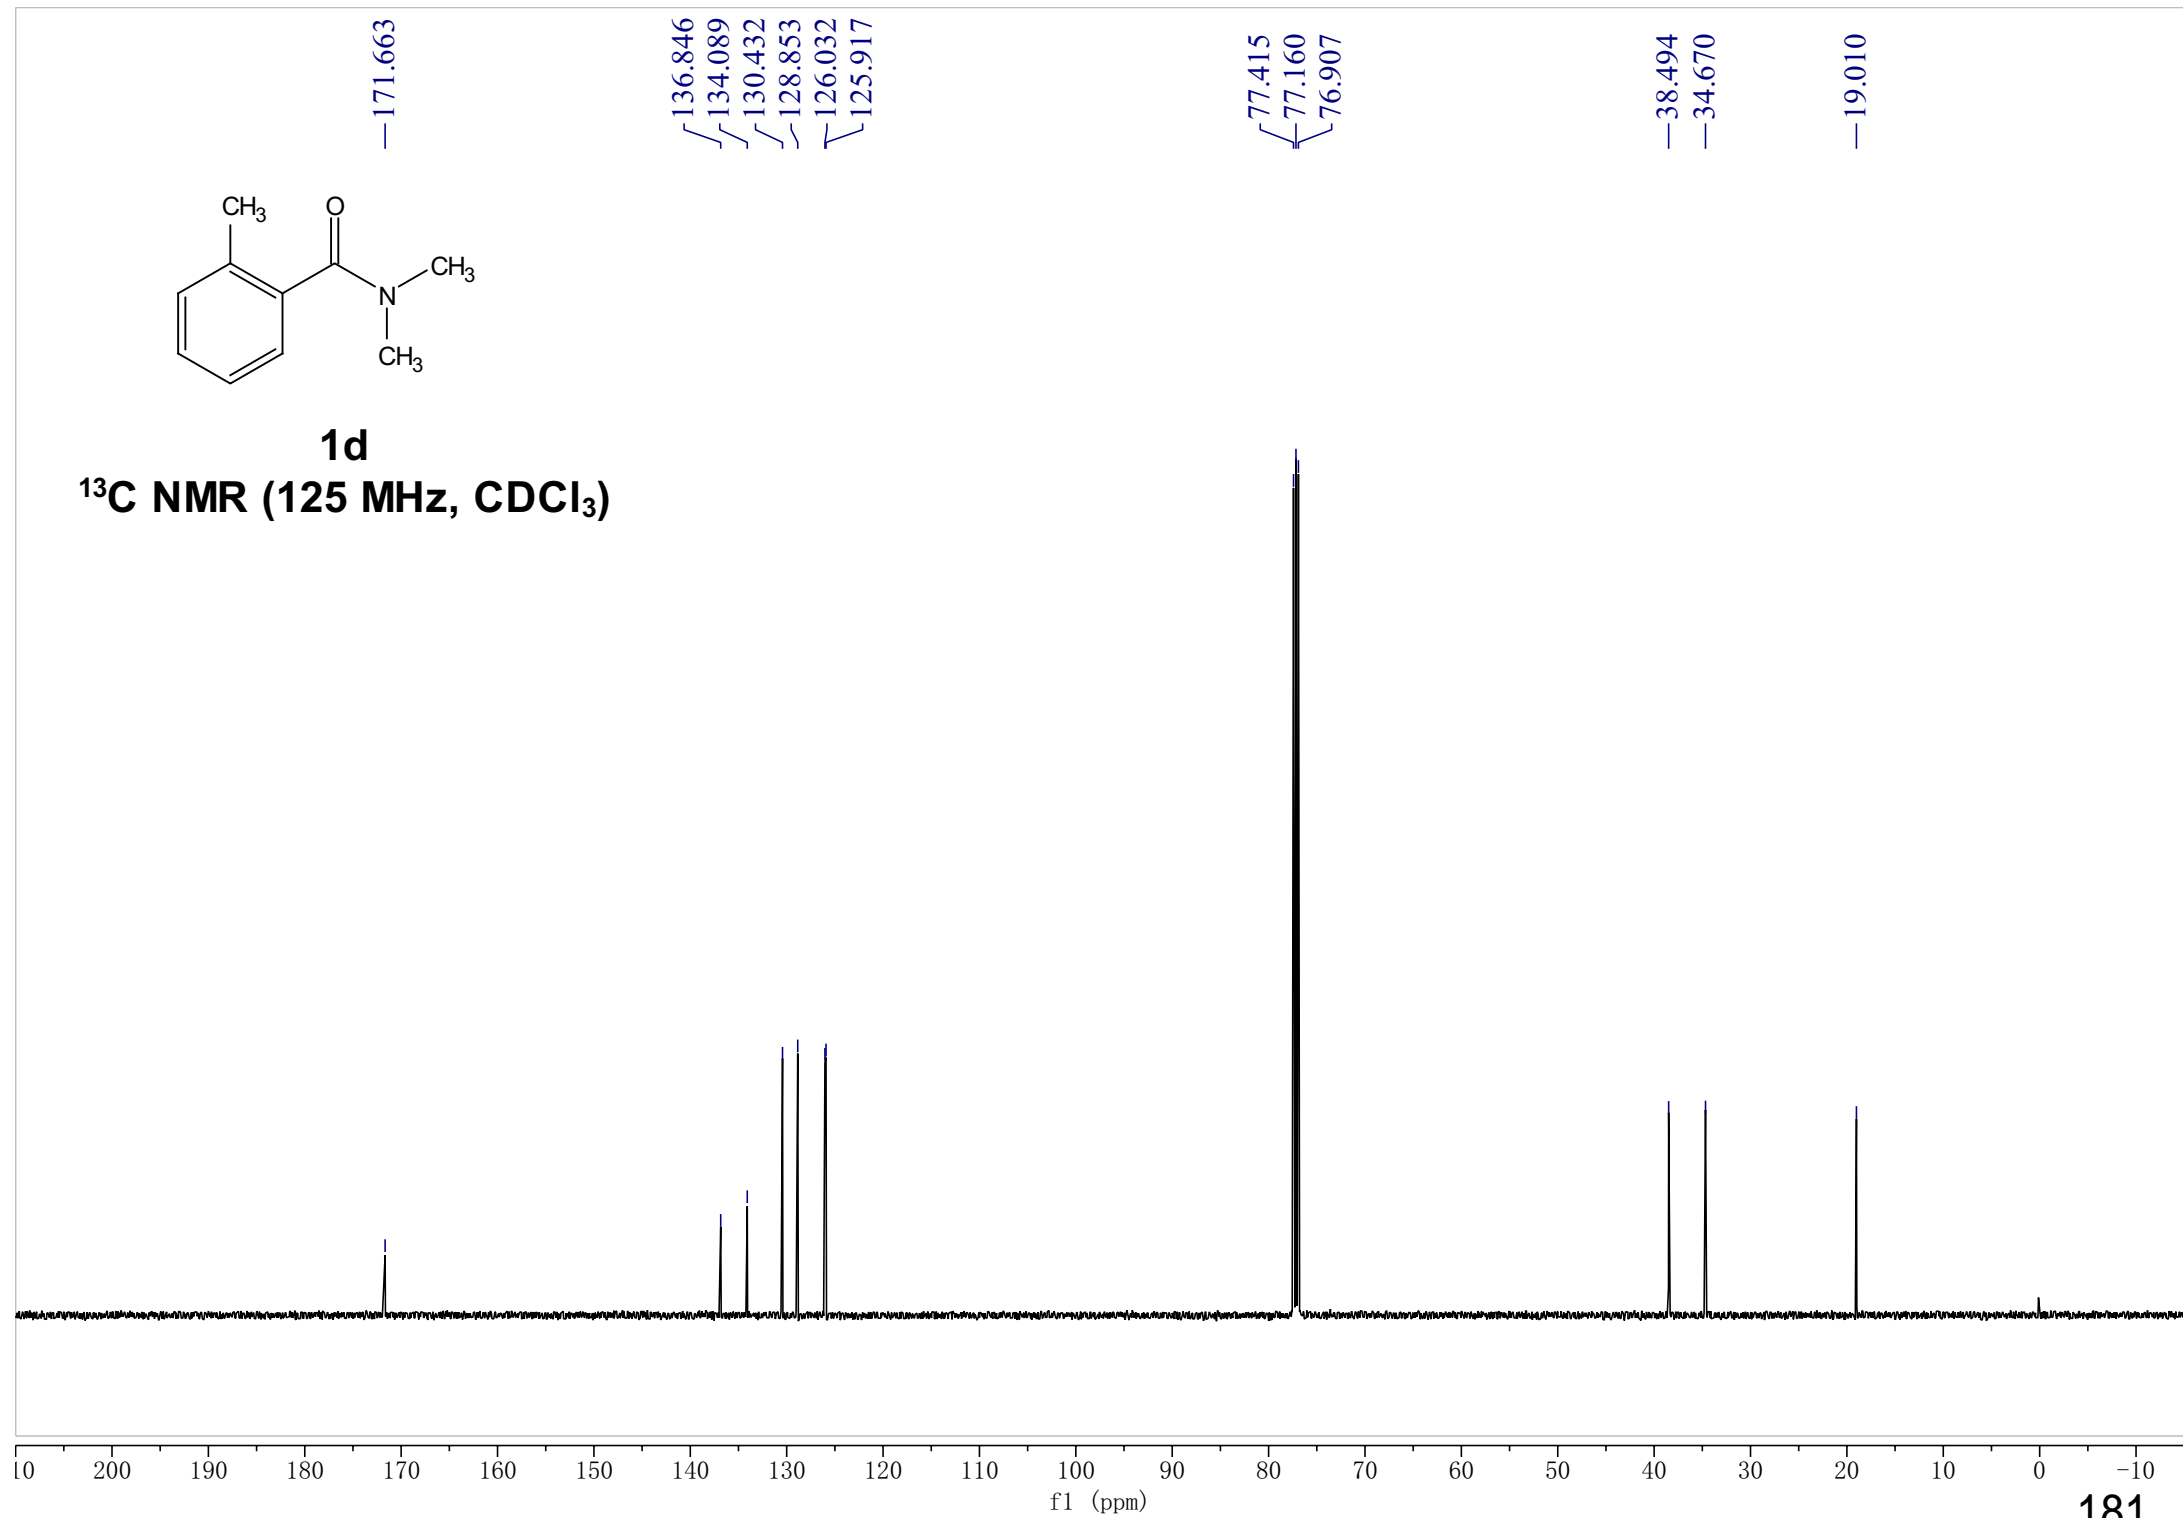

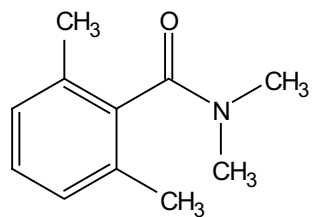

**1e**

**<sup>1</sup>H NMR (500 MHz, CDCl<sub>3</sub>)**

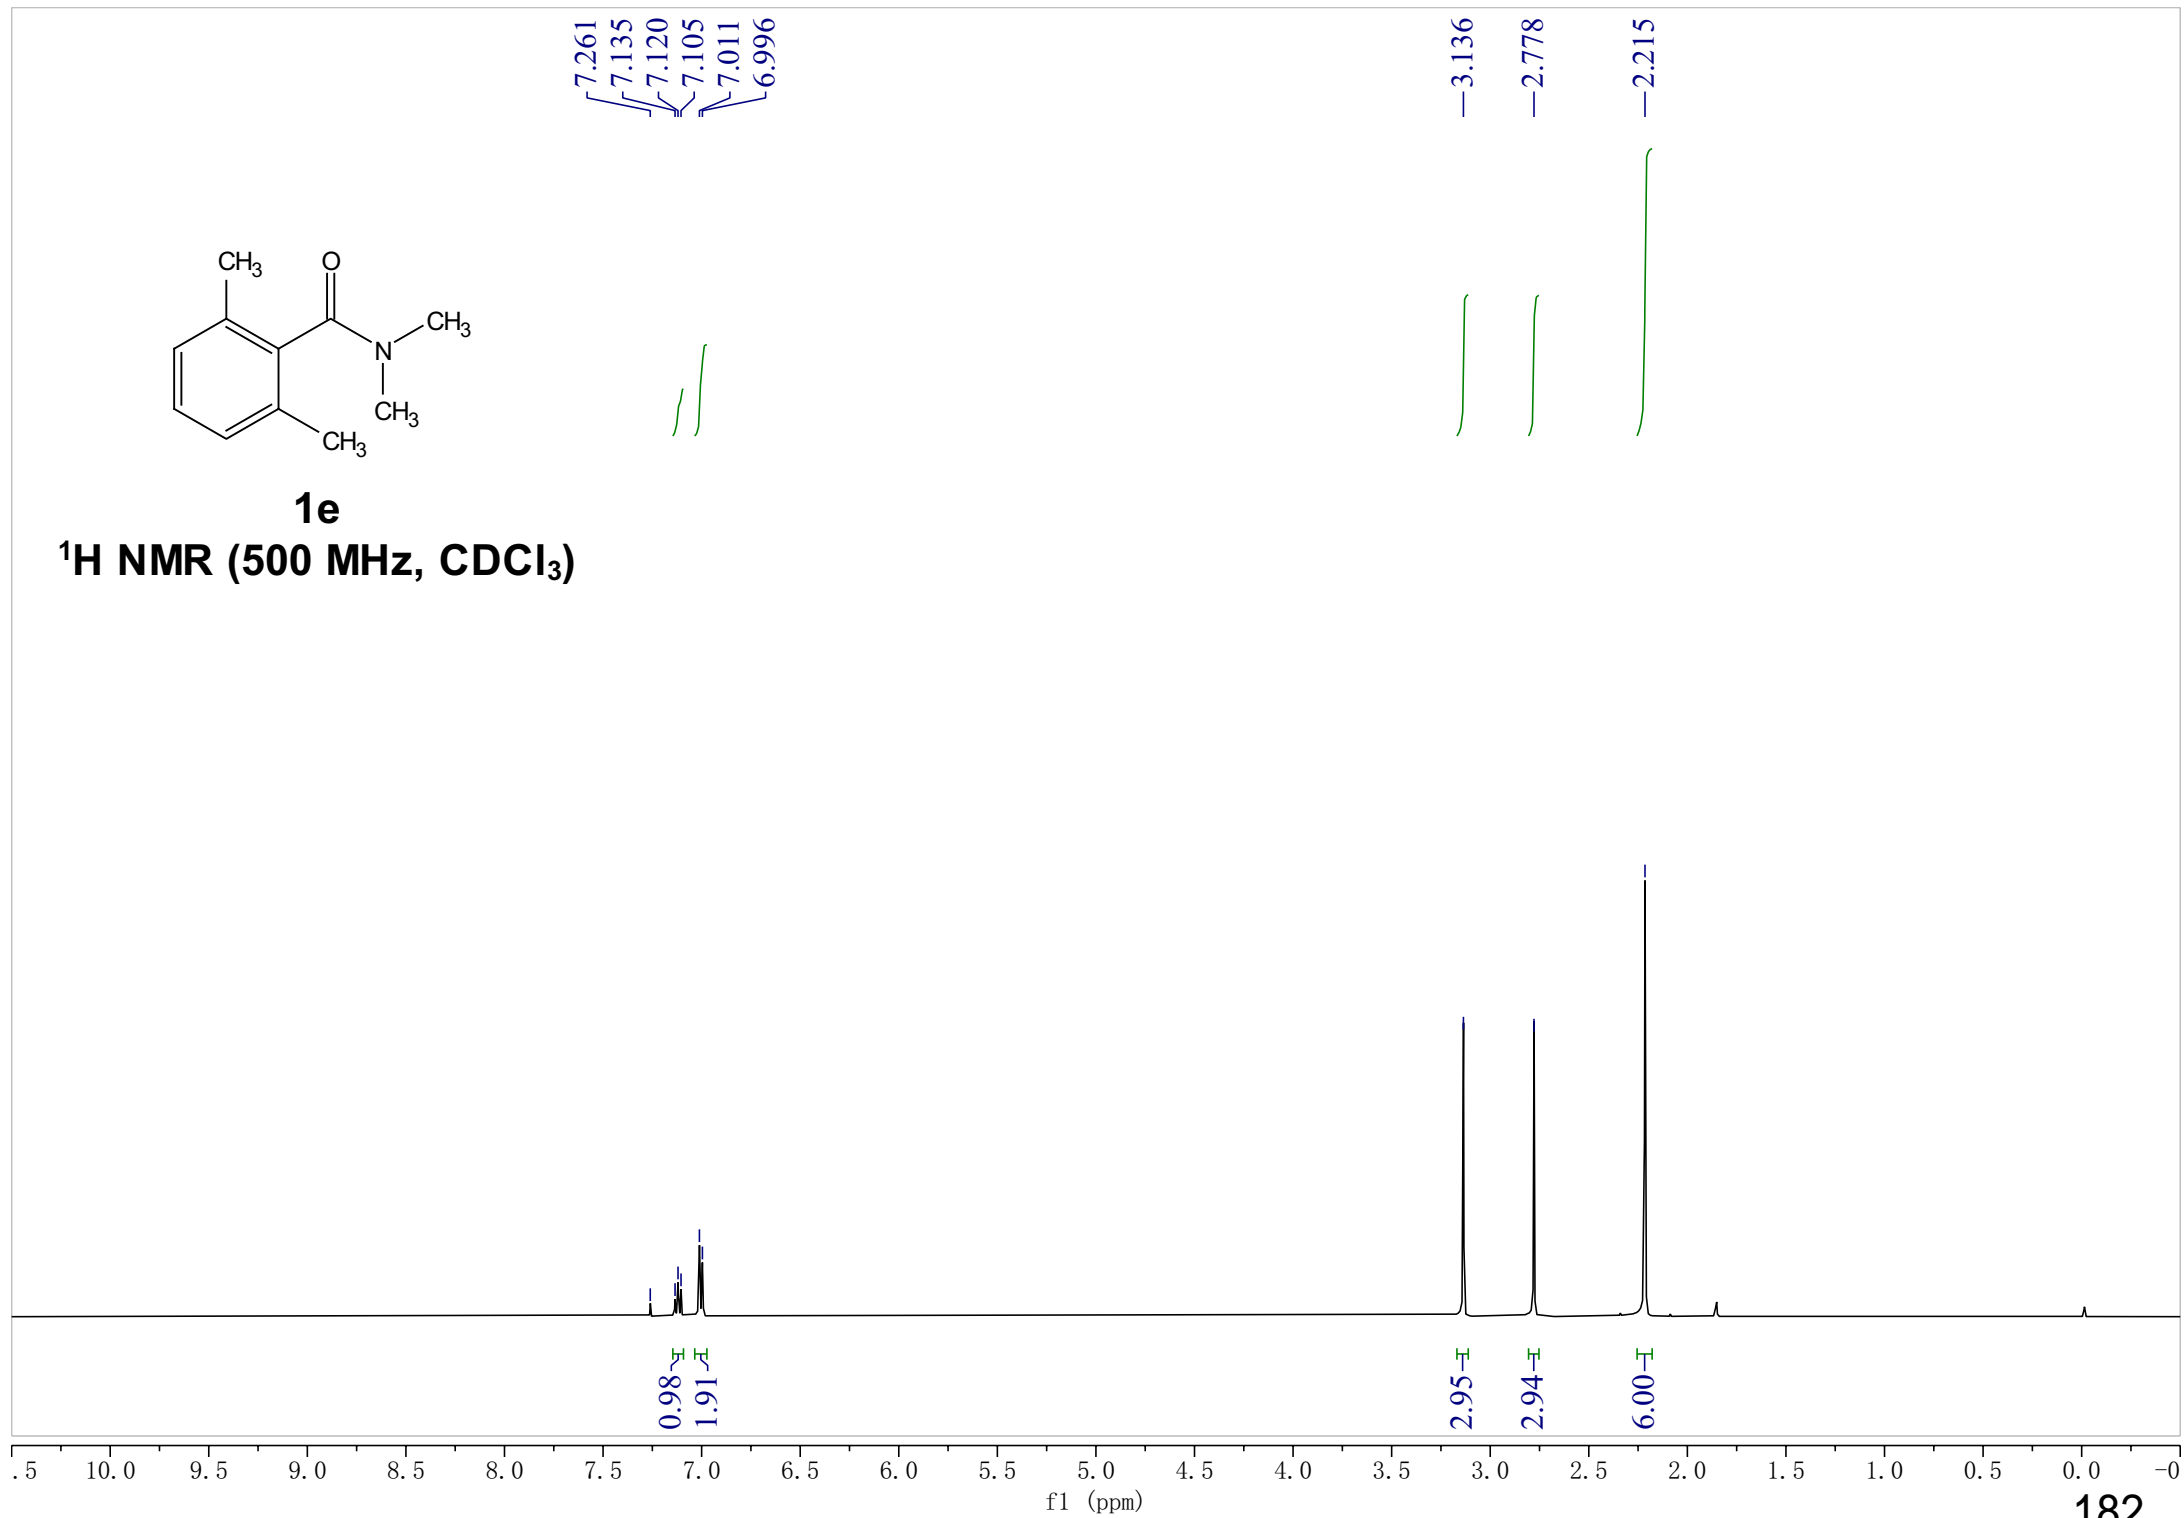

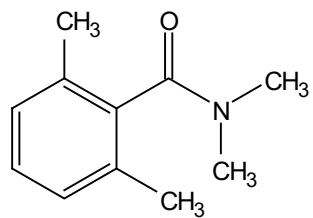

**1e**

**<sup>13</sup>C NMR (125 MHz, CDCl<sub>3</sub>)**

— 171.388

— 136.783

— 133.563

— 128.323

— 127.545

— 77.415

— 77.160

— 76.907

— 37.491

— 34.241

— 19.024

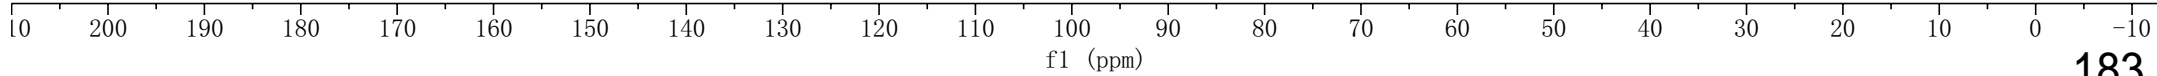



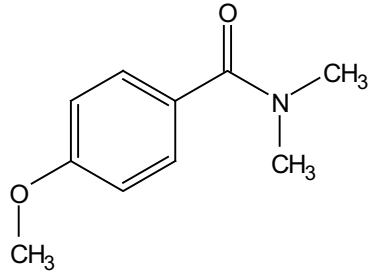

**1f**

**<sup>1</sup>H NMR (500 MHz, CDCl<sub>3</sub>)**

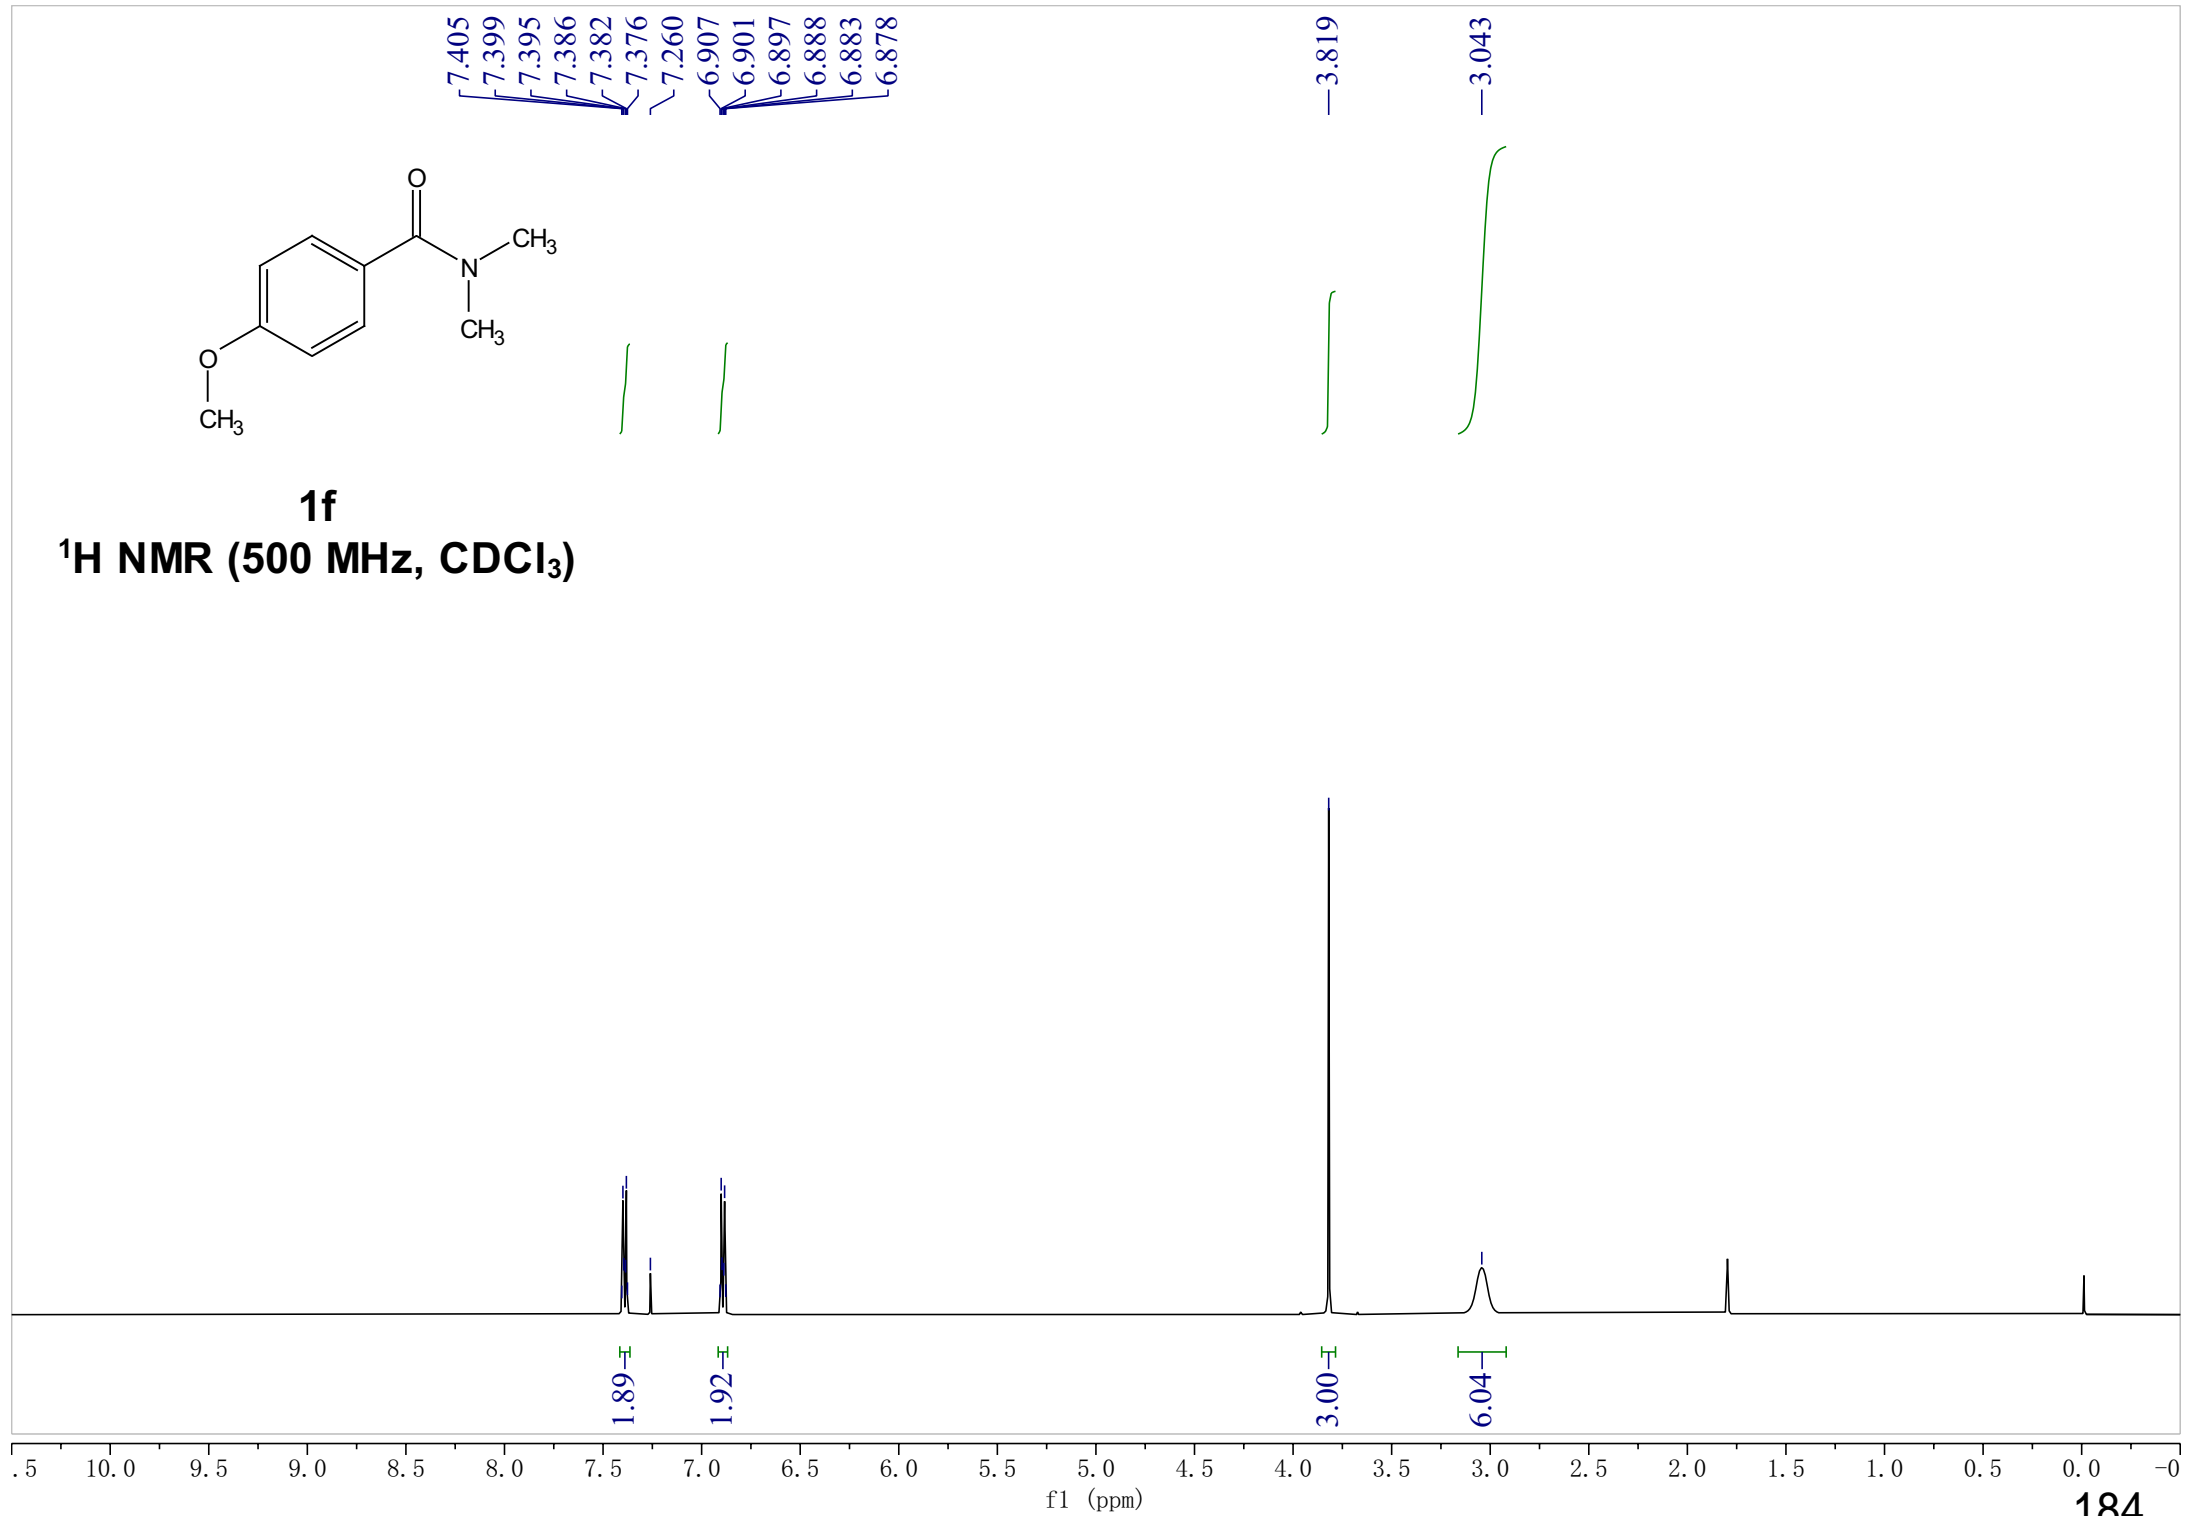

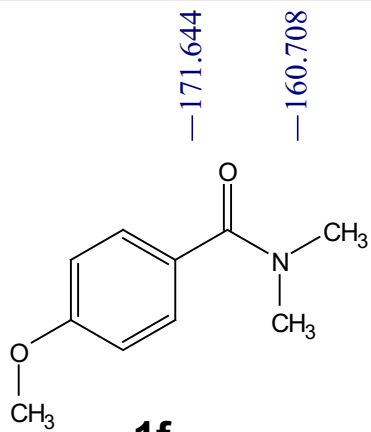

**1f**

**<sup>13</sup>C NMR (125 MHz, CDCl<sub>3</sub>)**

—171.644

—160.708

—129.240

—128.534

—113.662

—77.414

—77.160

—76.905

—55.441

—39.911

—35.682

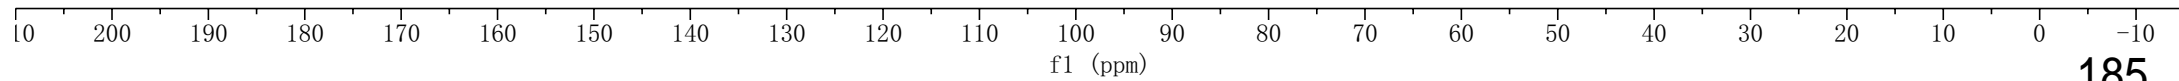

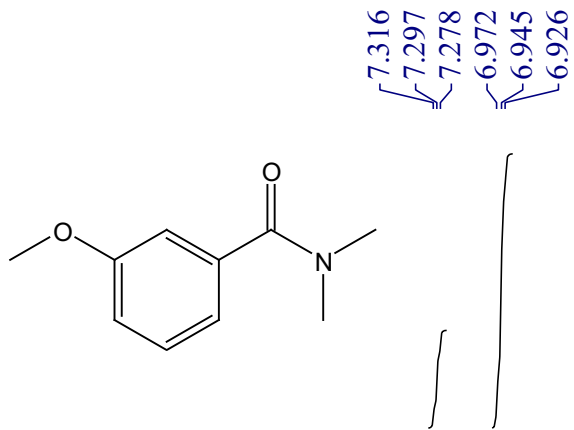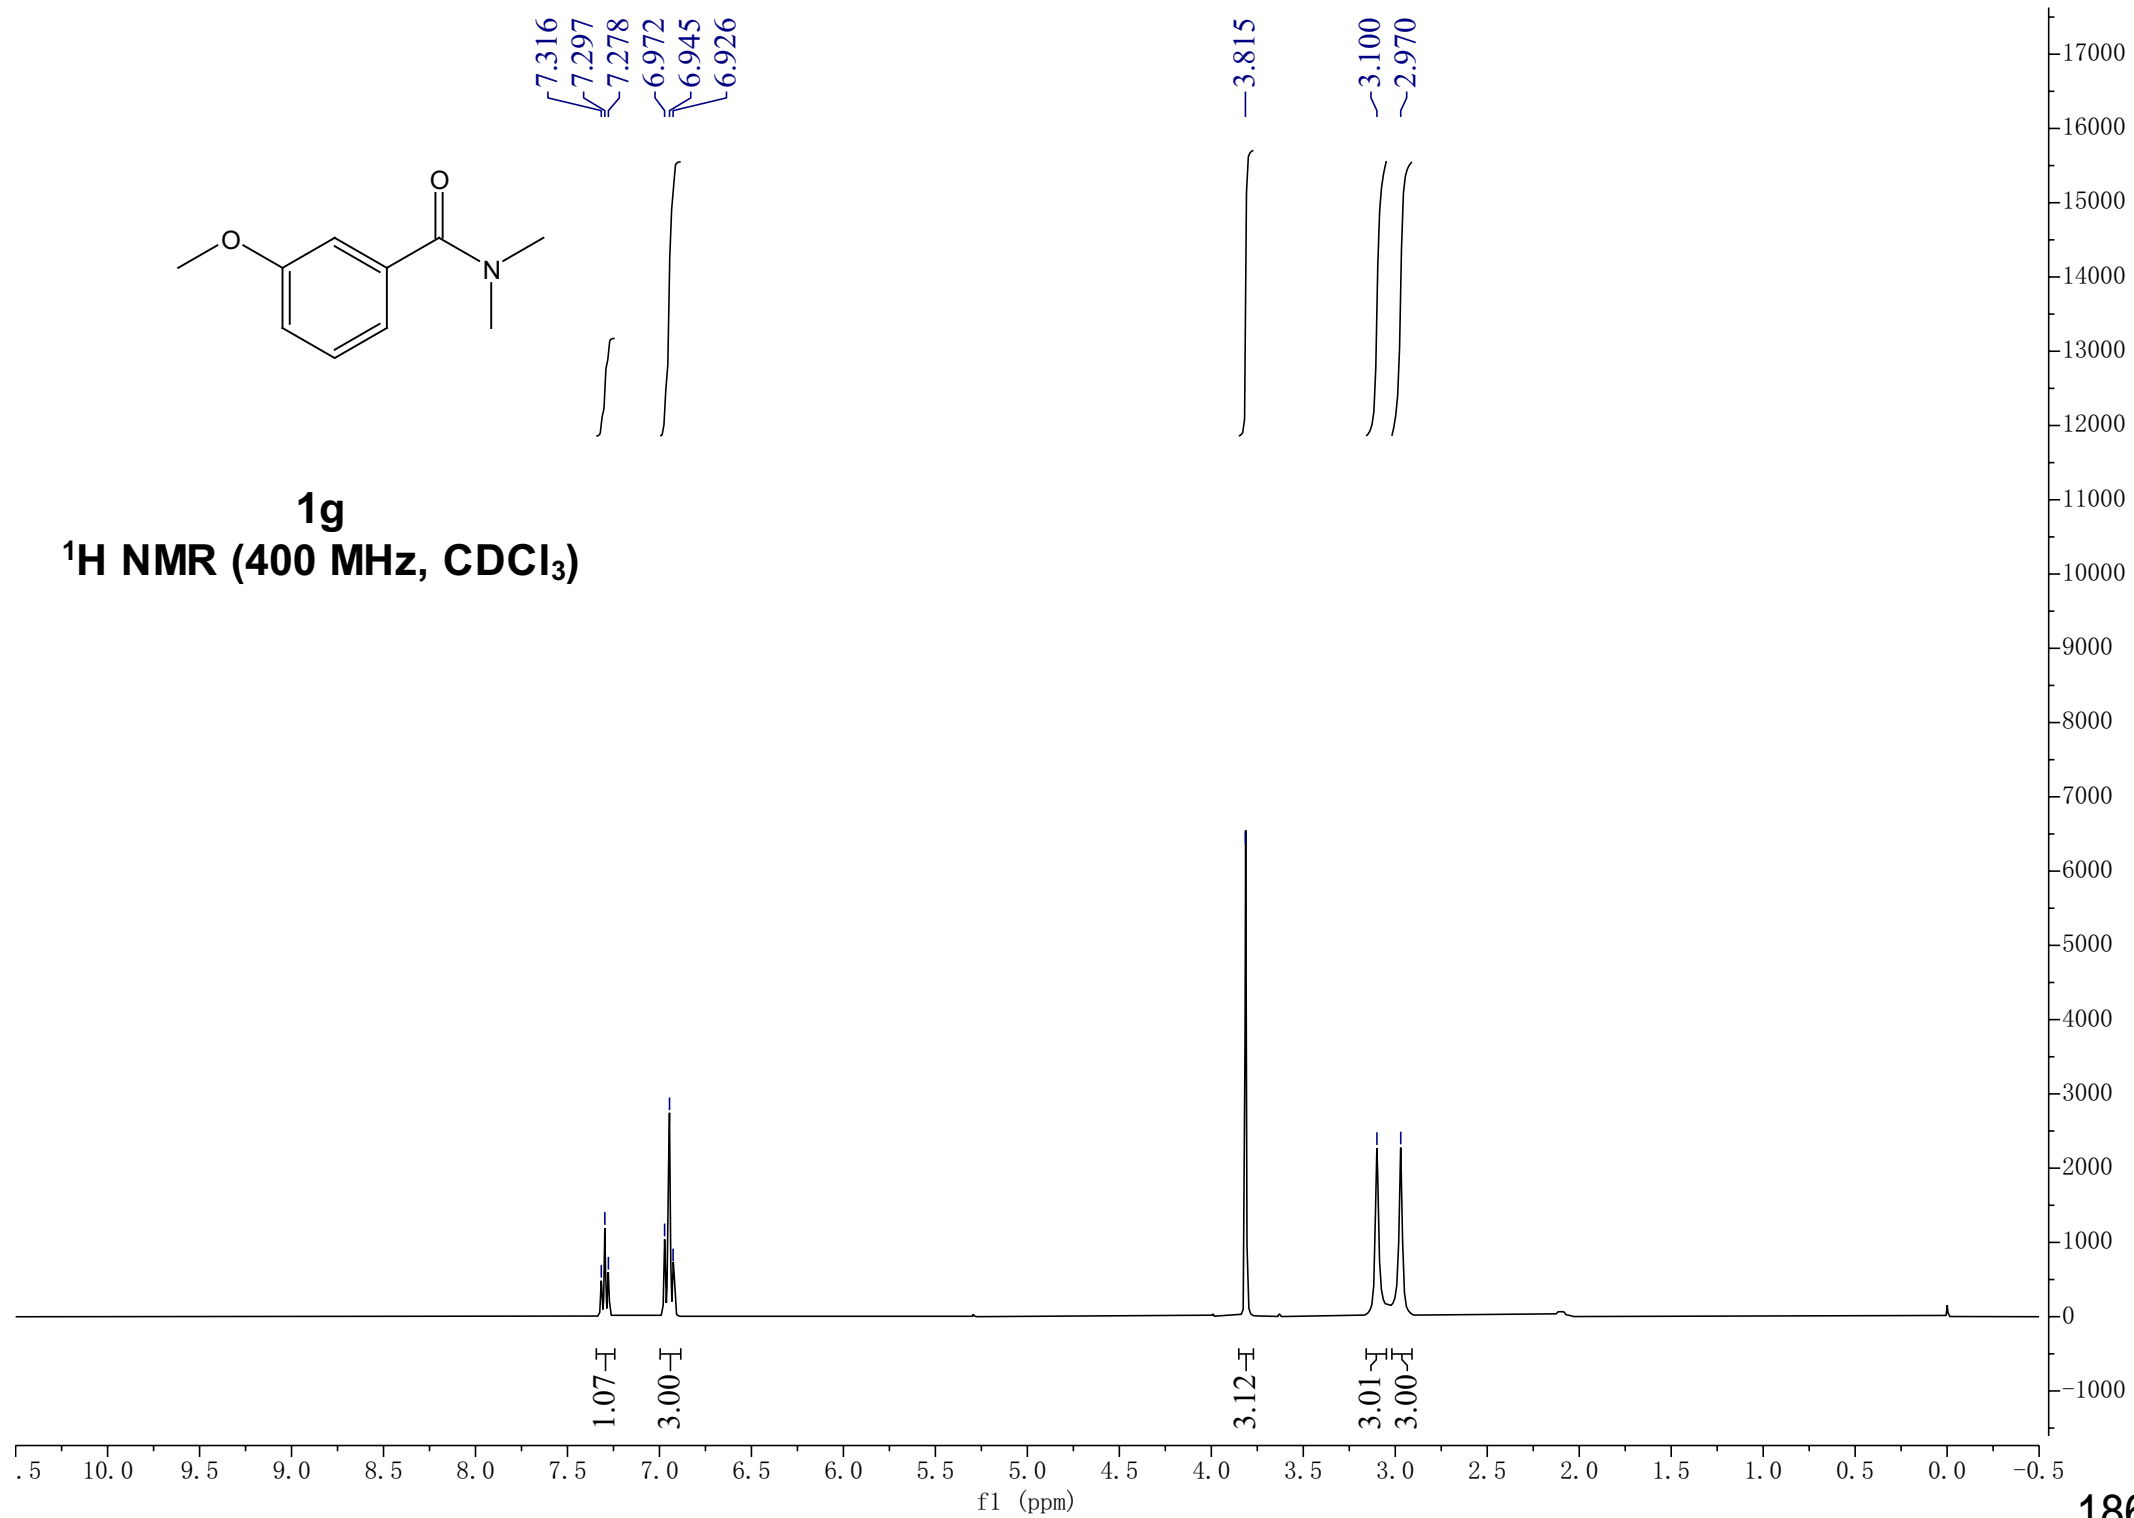

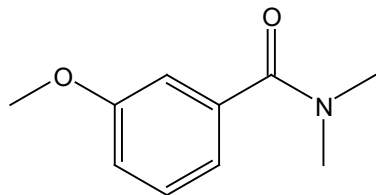

**1g**

**<sup>13</sup>C NMR (100 MHz, CDCl<sub>3</sub>)**

—171.378

—159.549

—137.679

—129.466

~119.149

~115.394

~112.379

{ 77.477  
77.160 CDCl<sub>3</sub>  
76.839 }

—55.345

—39.542

—35.291

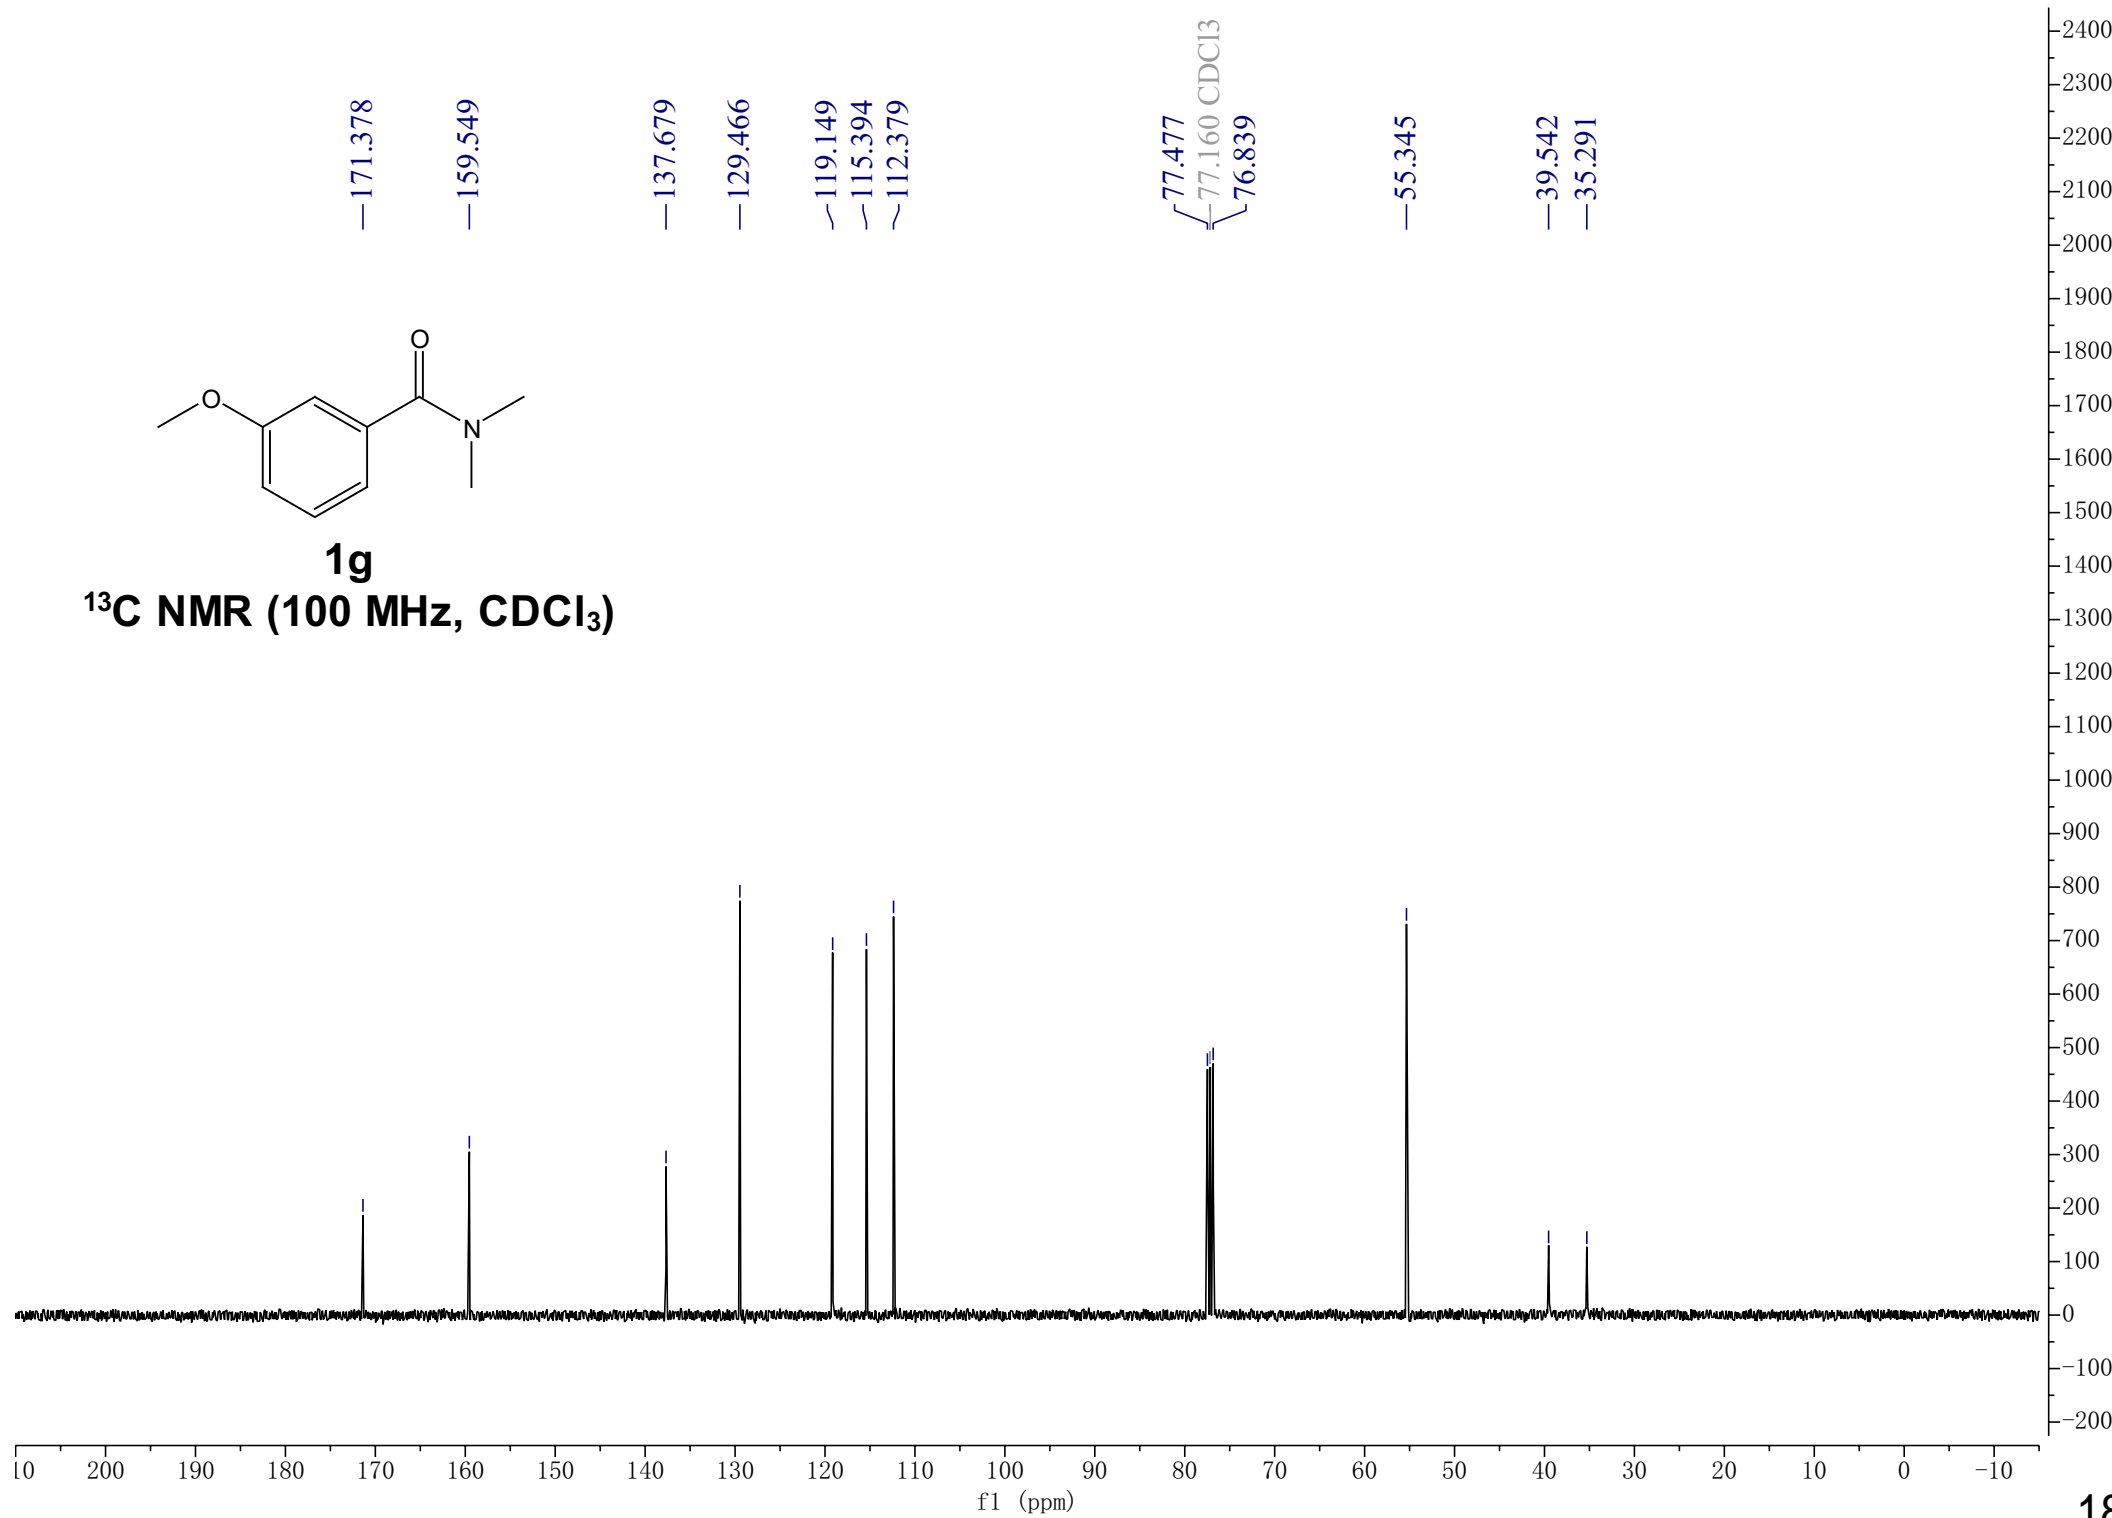

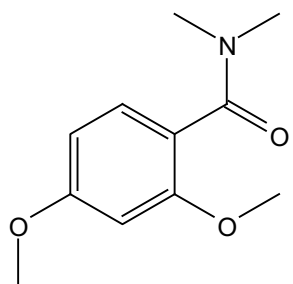

**1h**

**<sup>1</sup>H NMR (500 MHz, CDCl<sub>3</sub>)**

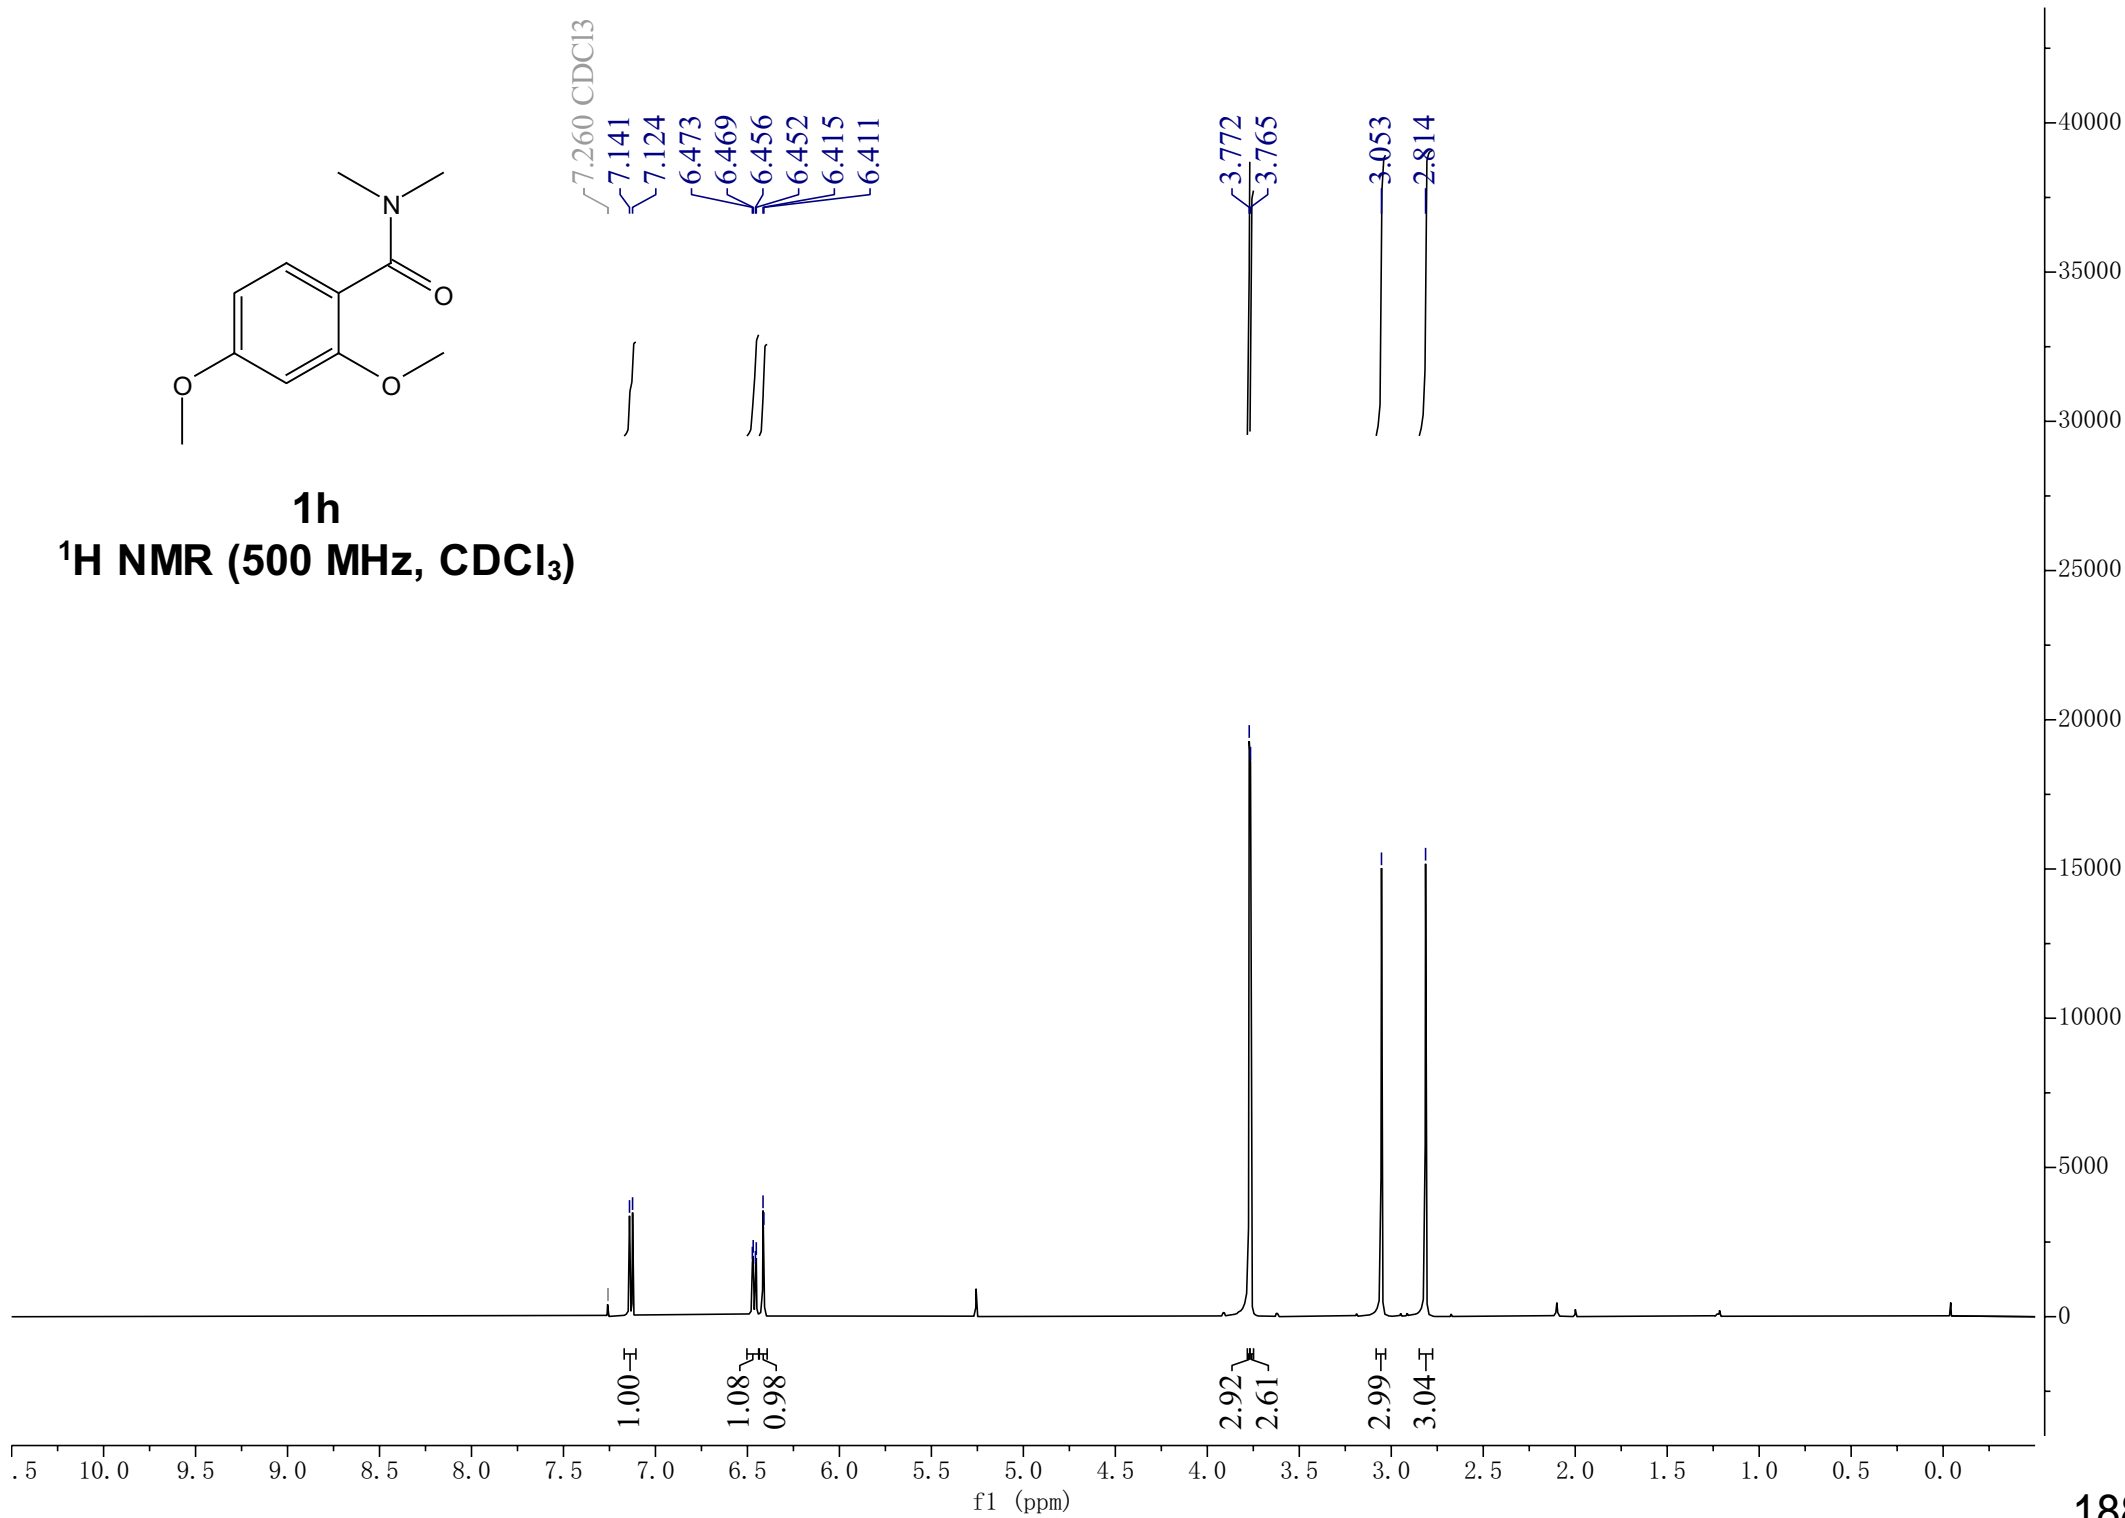

CCN(C)C(=O)c1cc(OC)ccc1OC  
**1h**  
**<sup>13</sup>C NMR (125 MHz, CDCl<sub>3</sub>)**

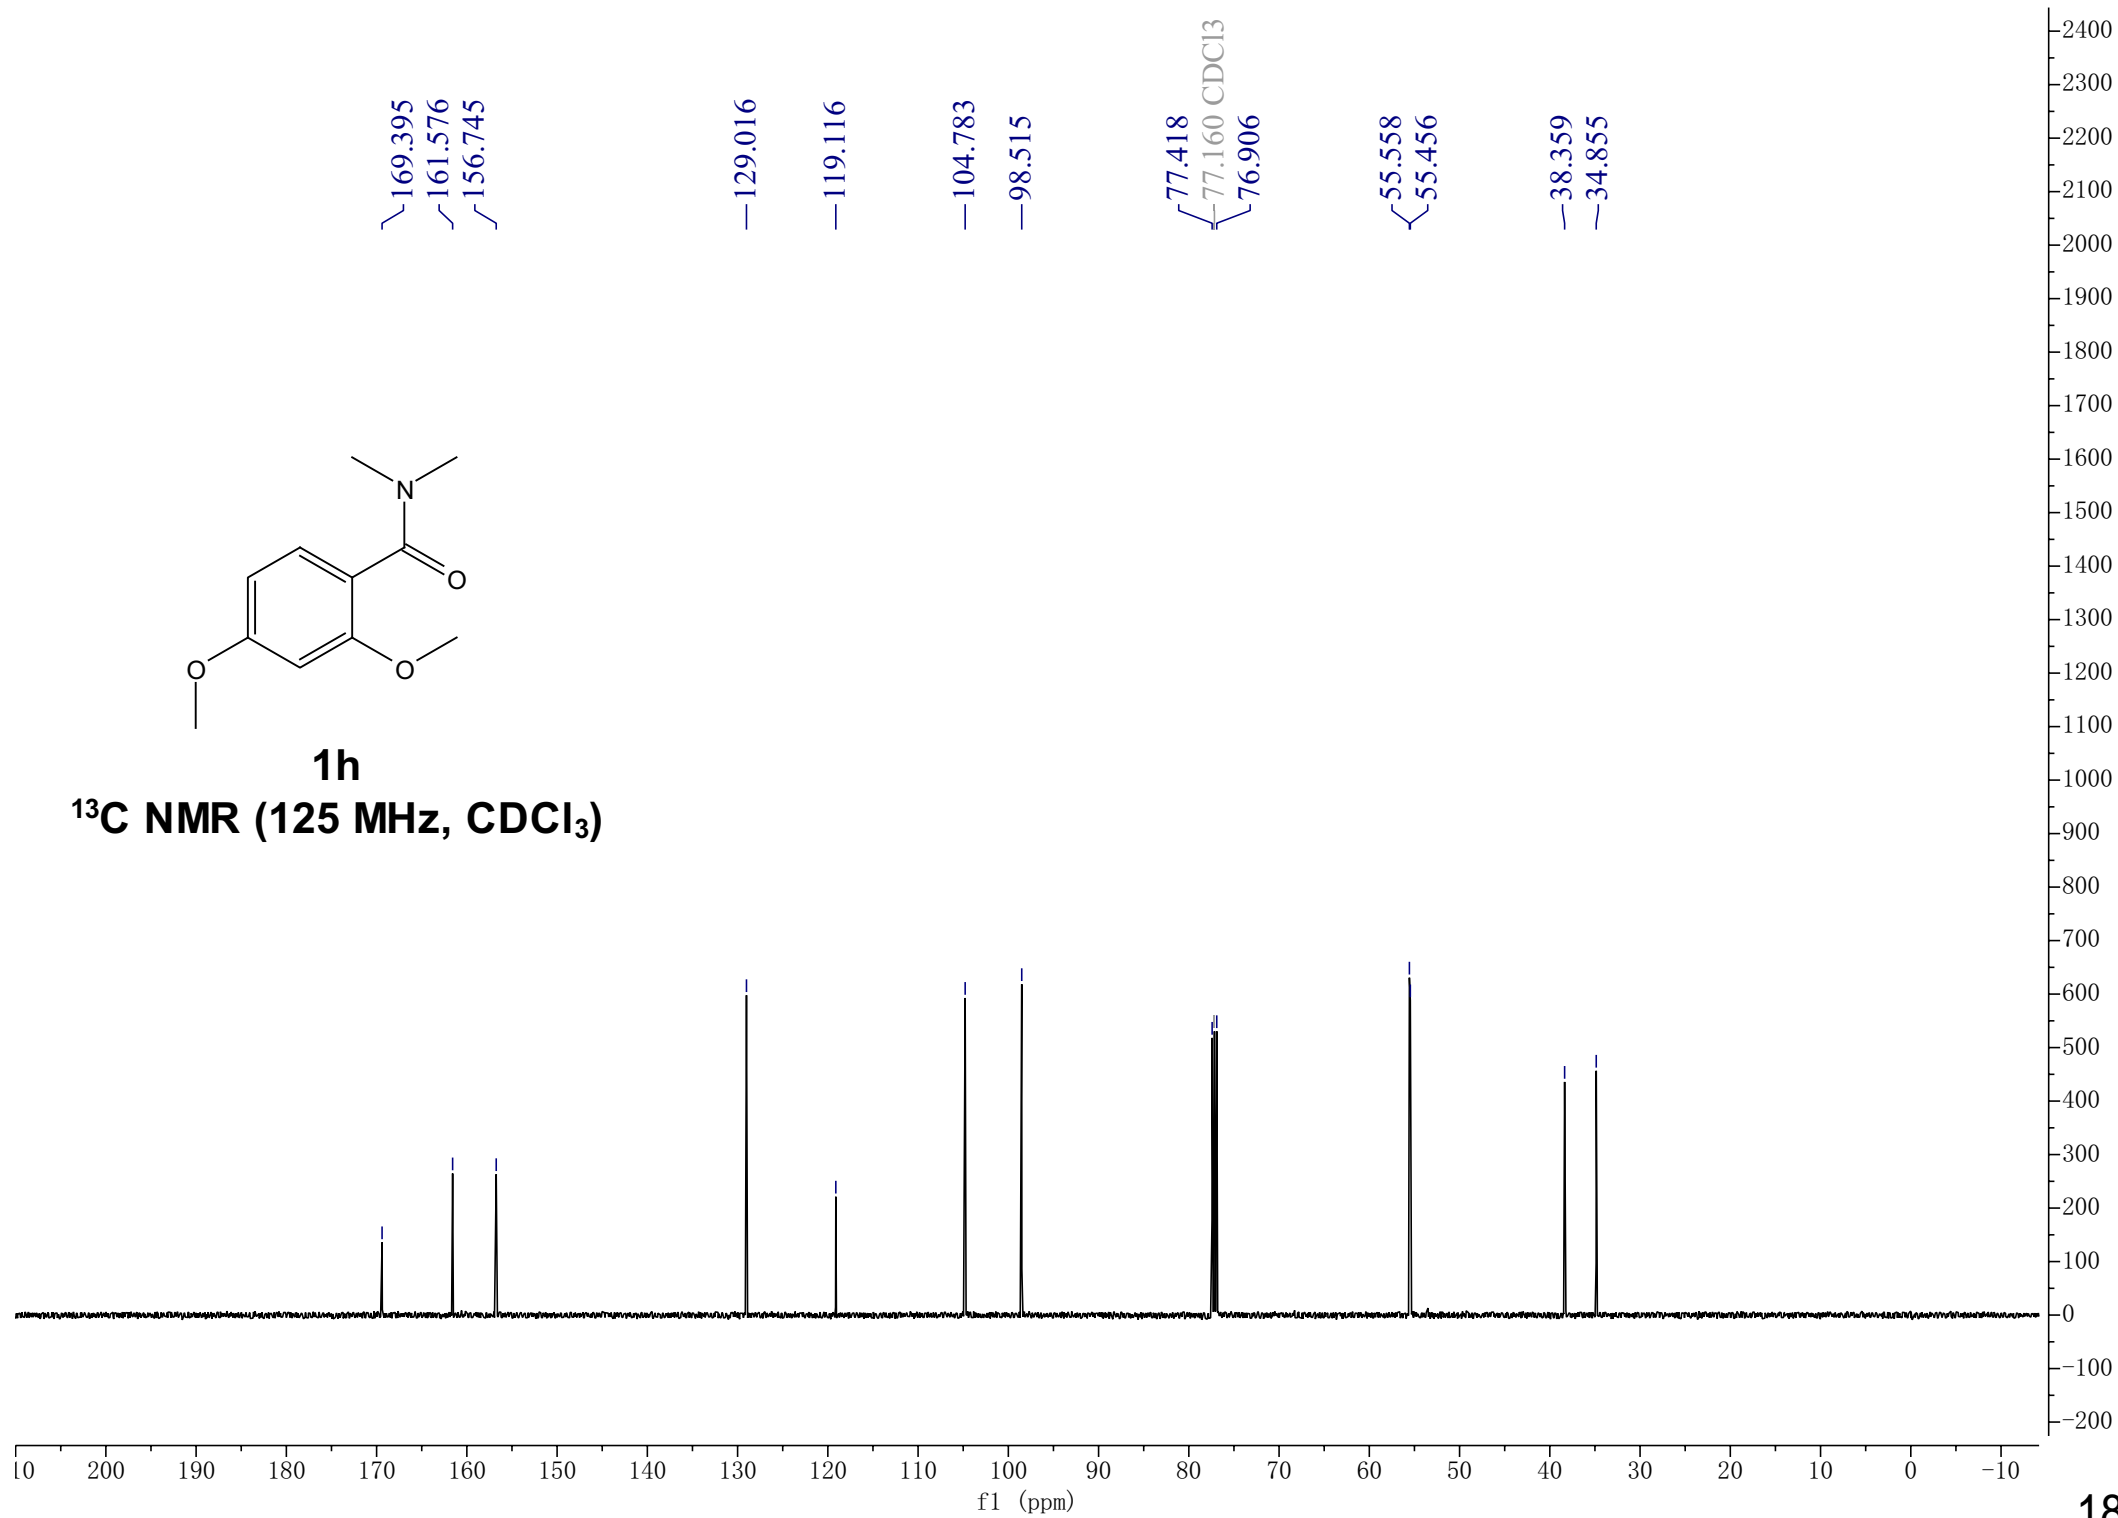

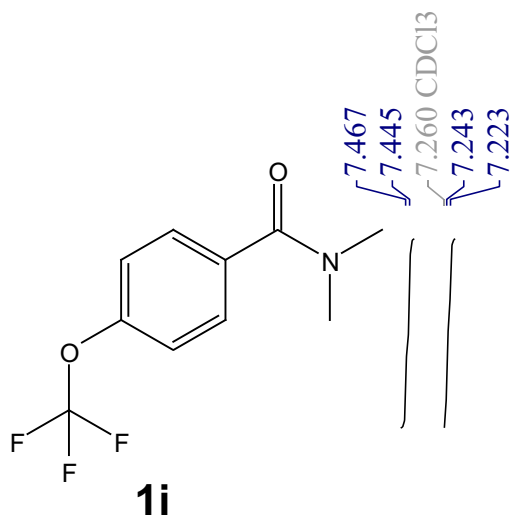

**<sup>1</sup>H NMR (400 MHz, CDCl<sub>3</sub>)**

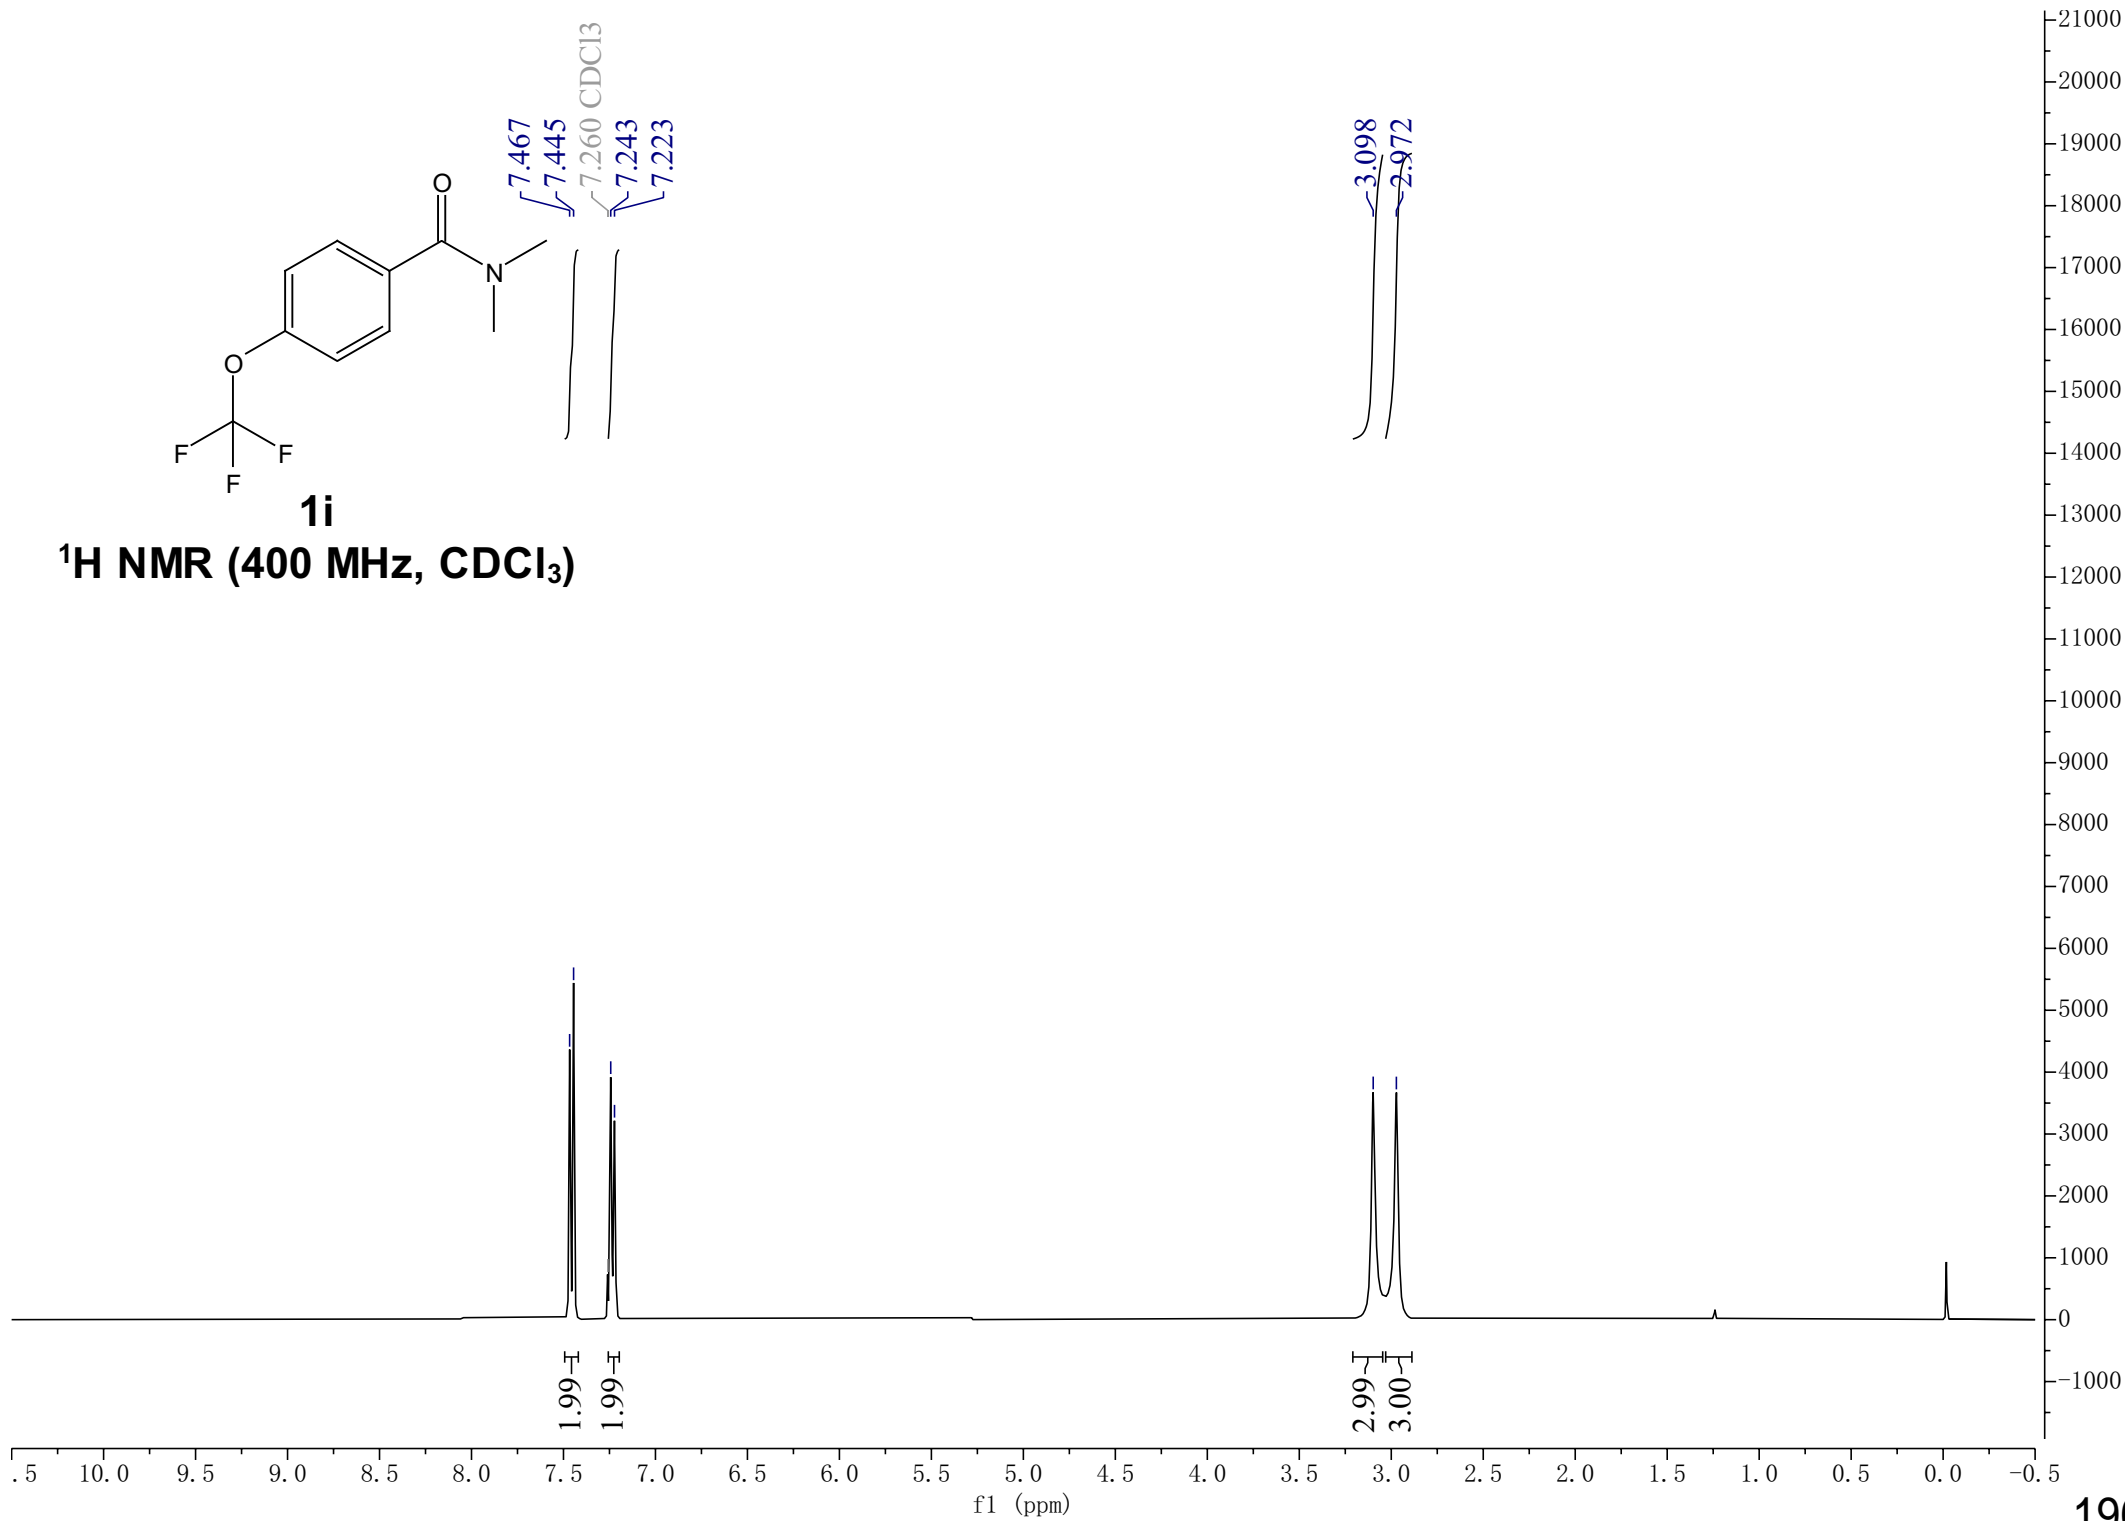

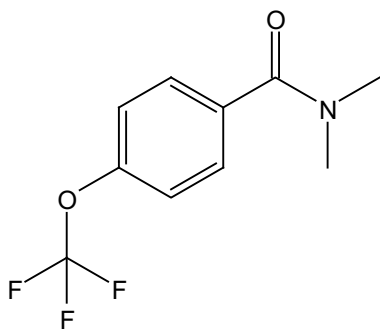

**1i**

**<sup>13</sup>C NMR (100 MHz, CDCl<sub>3</sub>)**

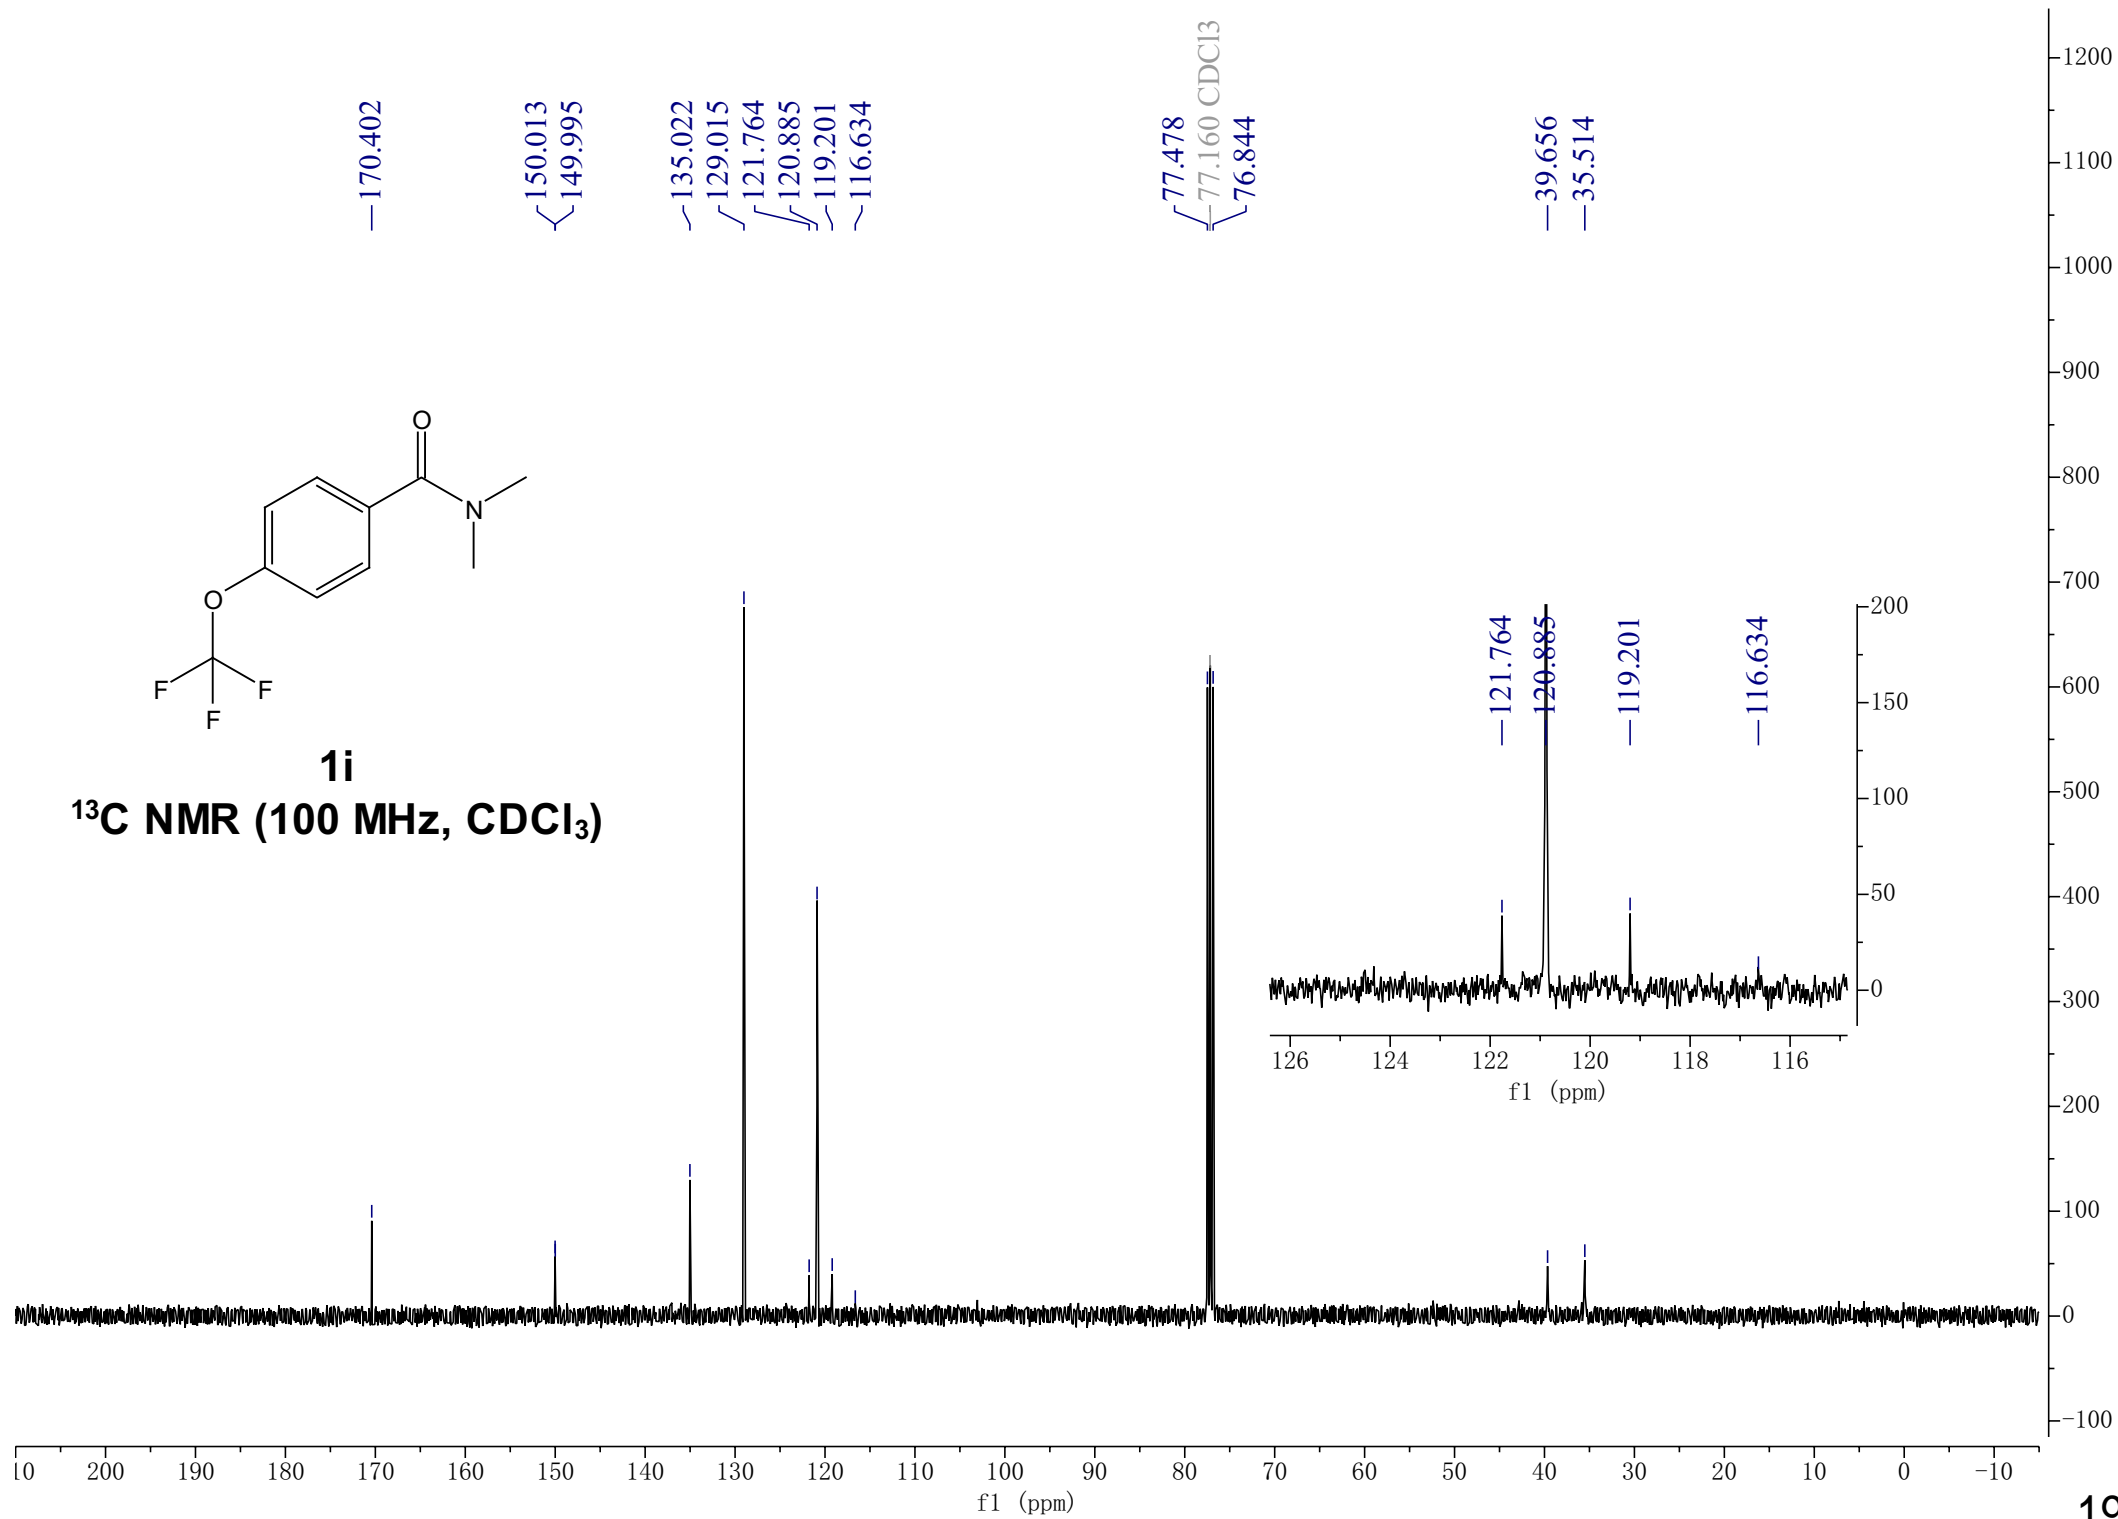



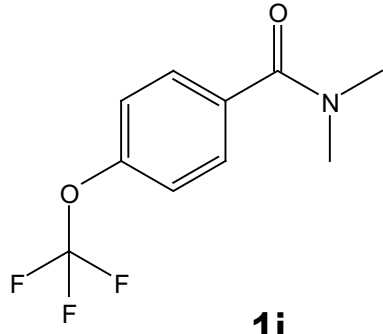

**1i**  
**<sup>19</sup>F NMR (376 MHz, CDCl<sub>3</sub>)**

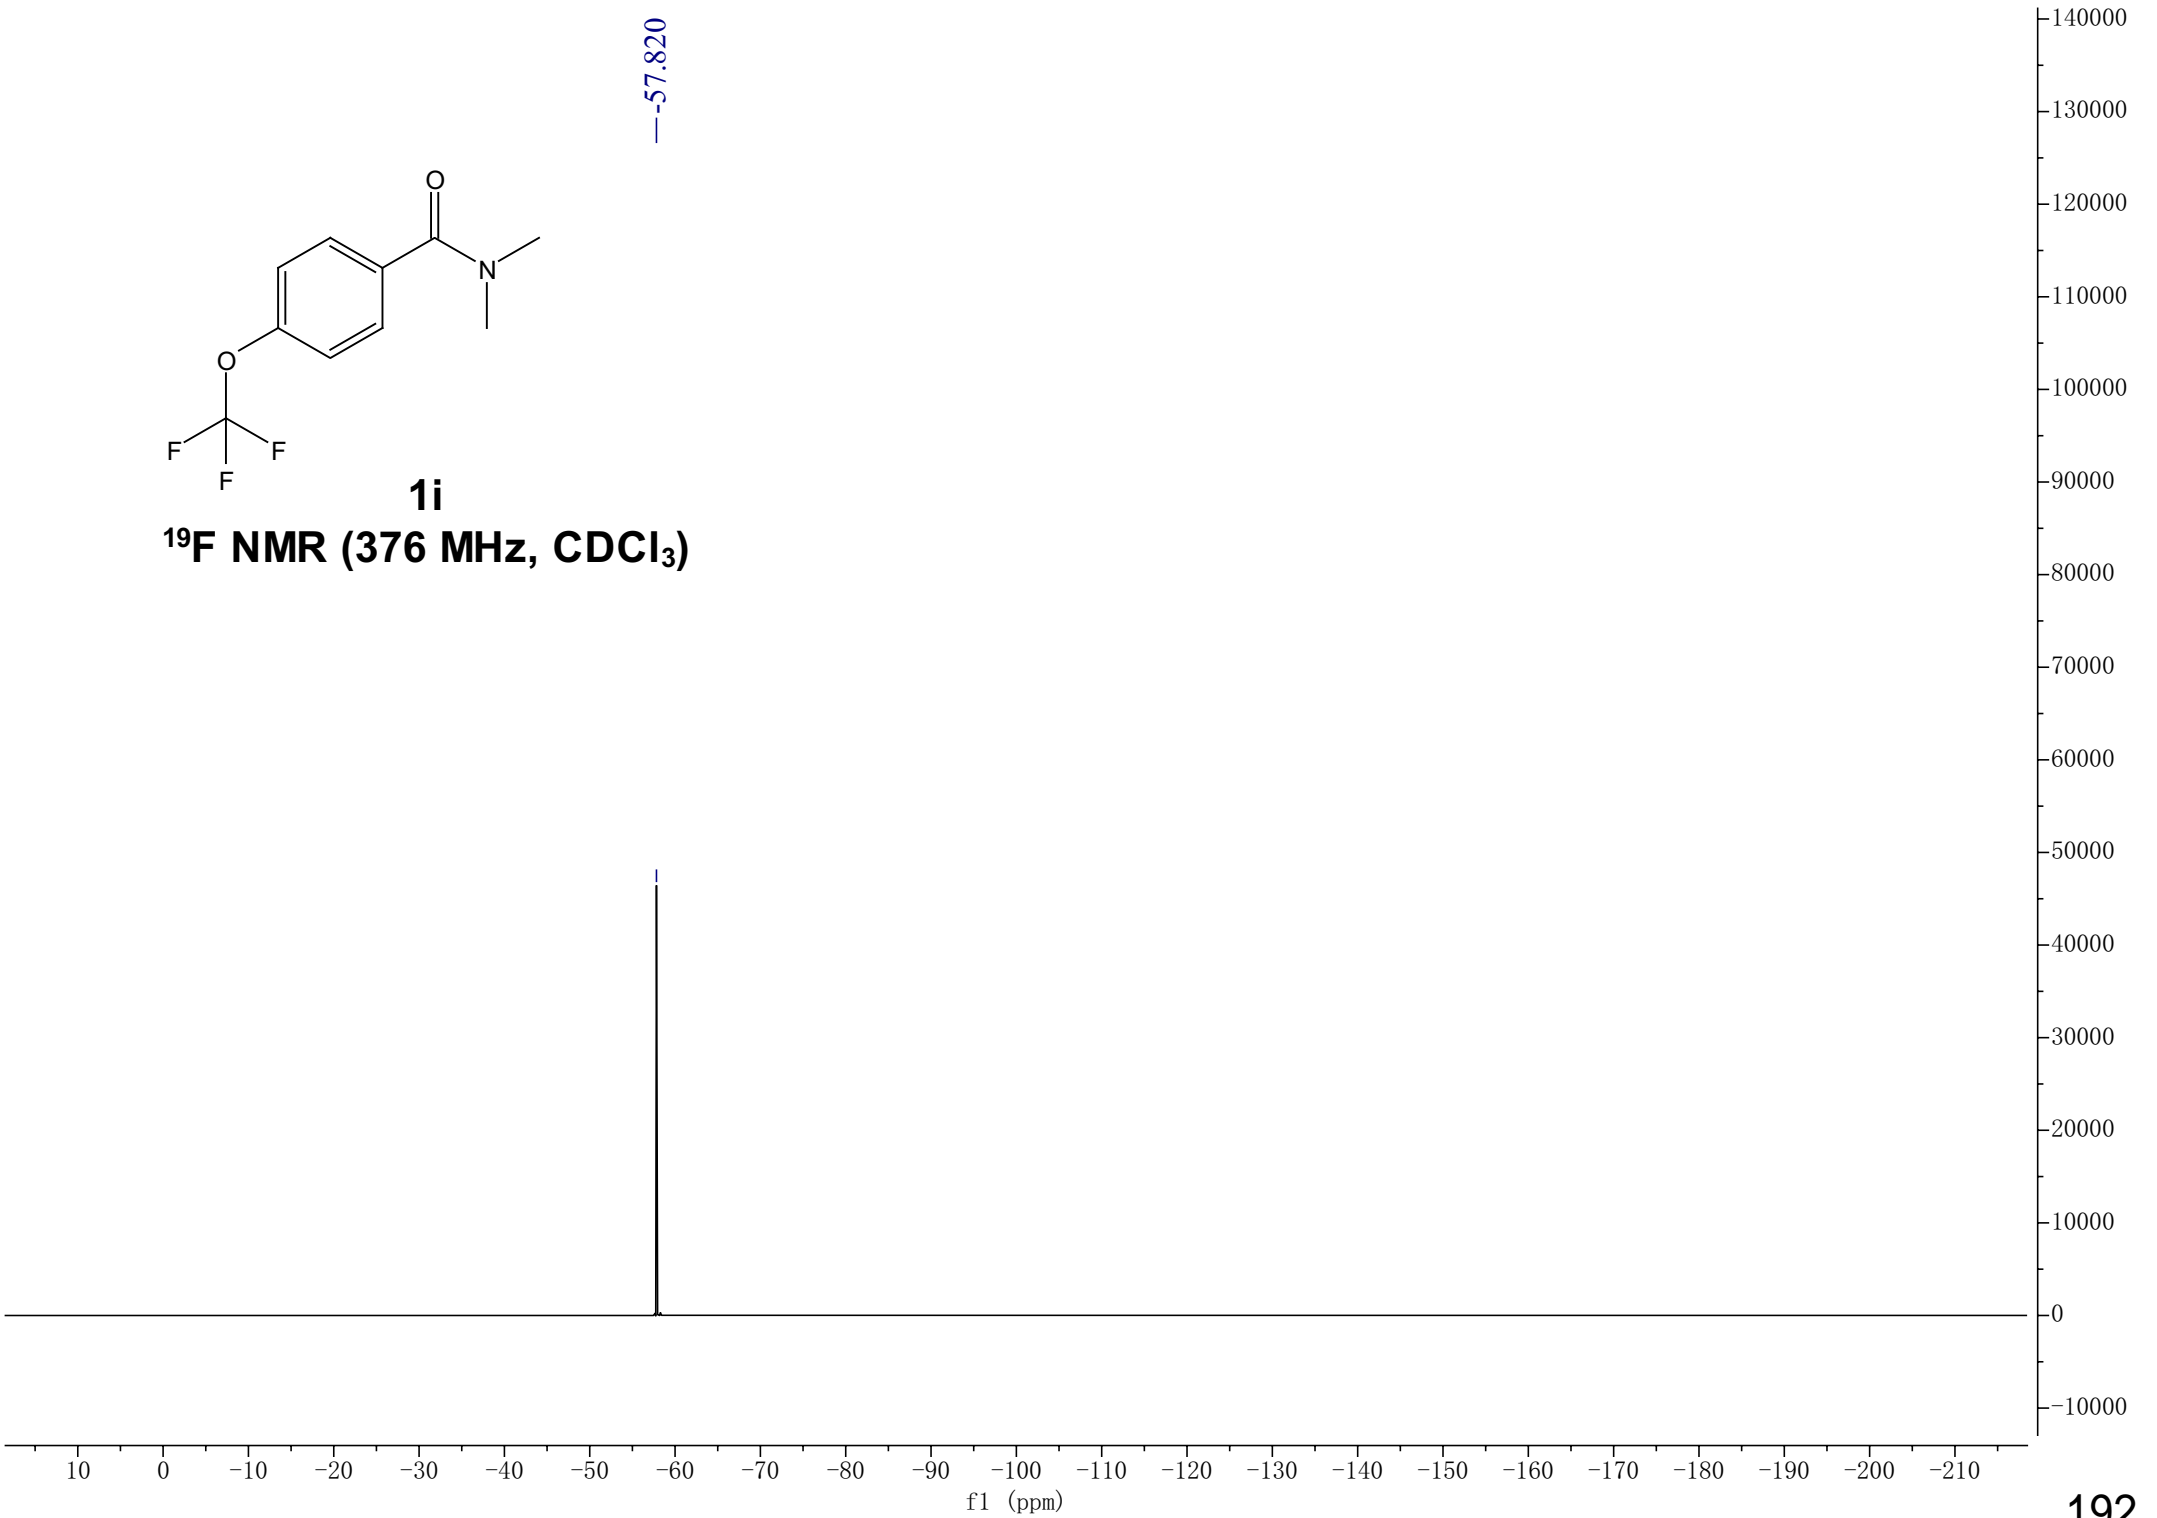

**1j**  
**<sup>1</sup>H NMR (500 MHz, CDCl<sub>3</sub>)**

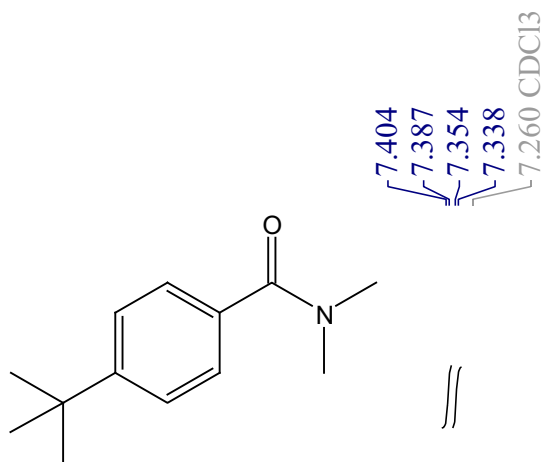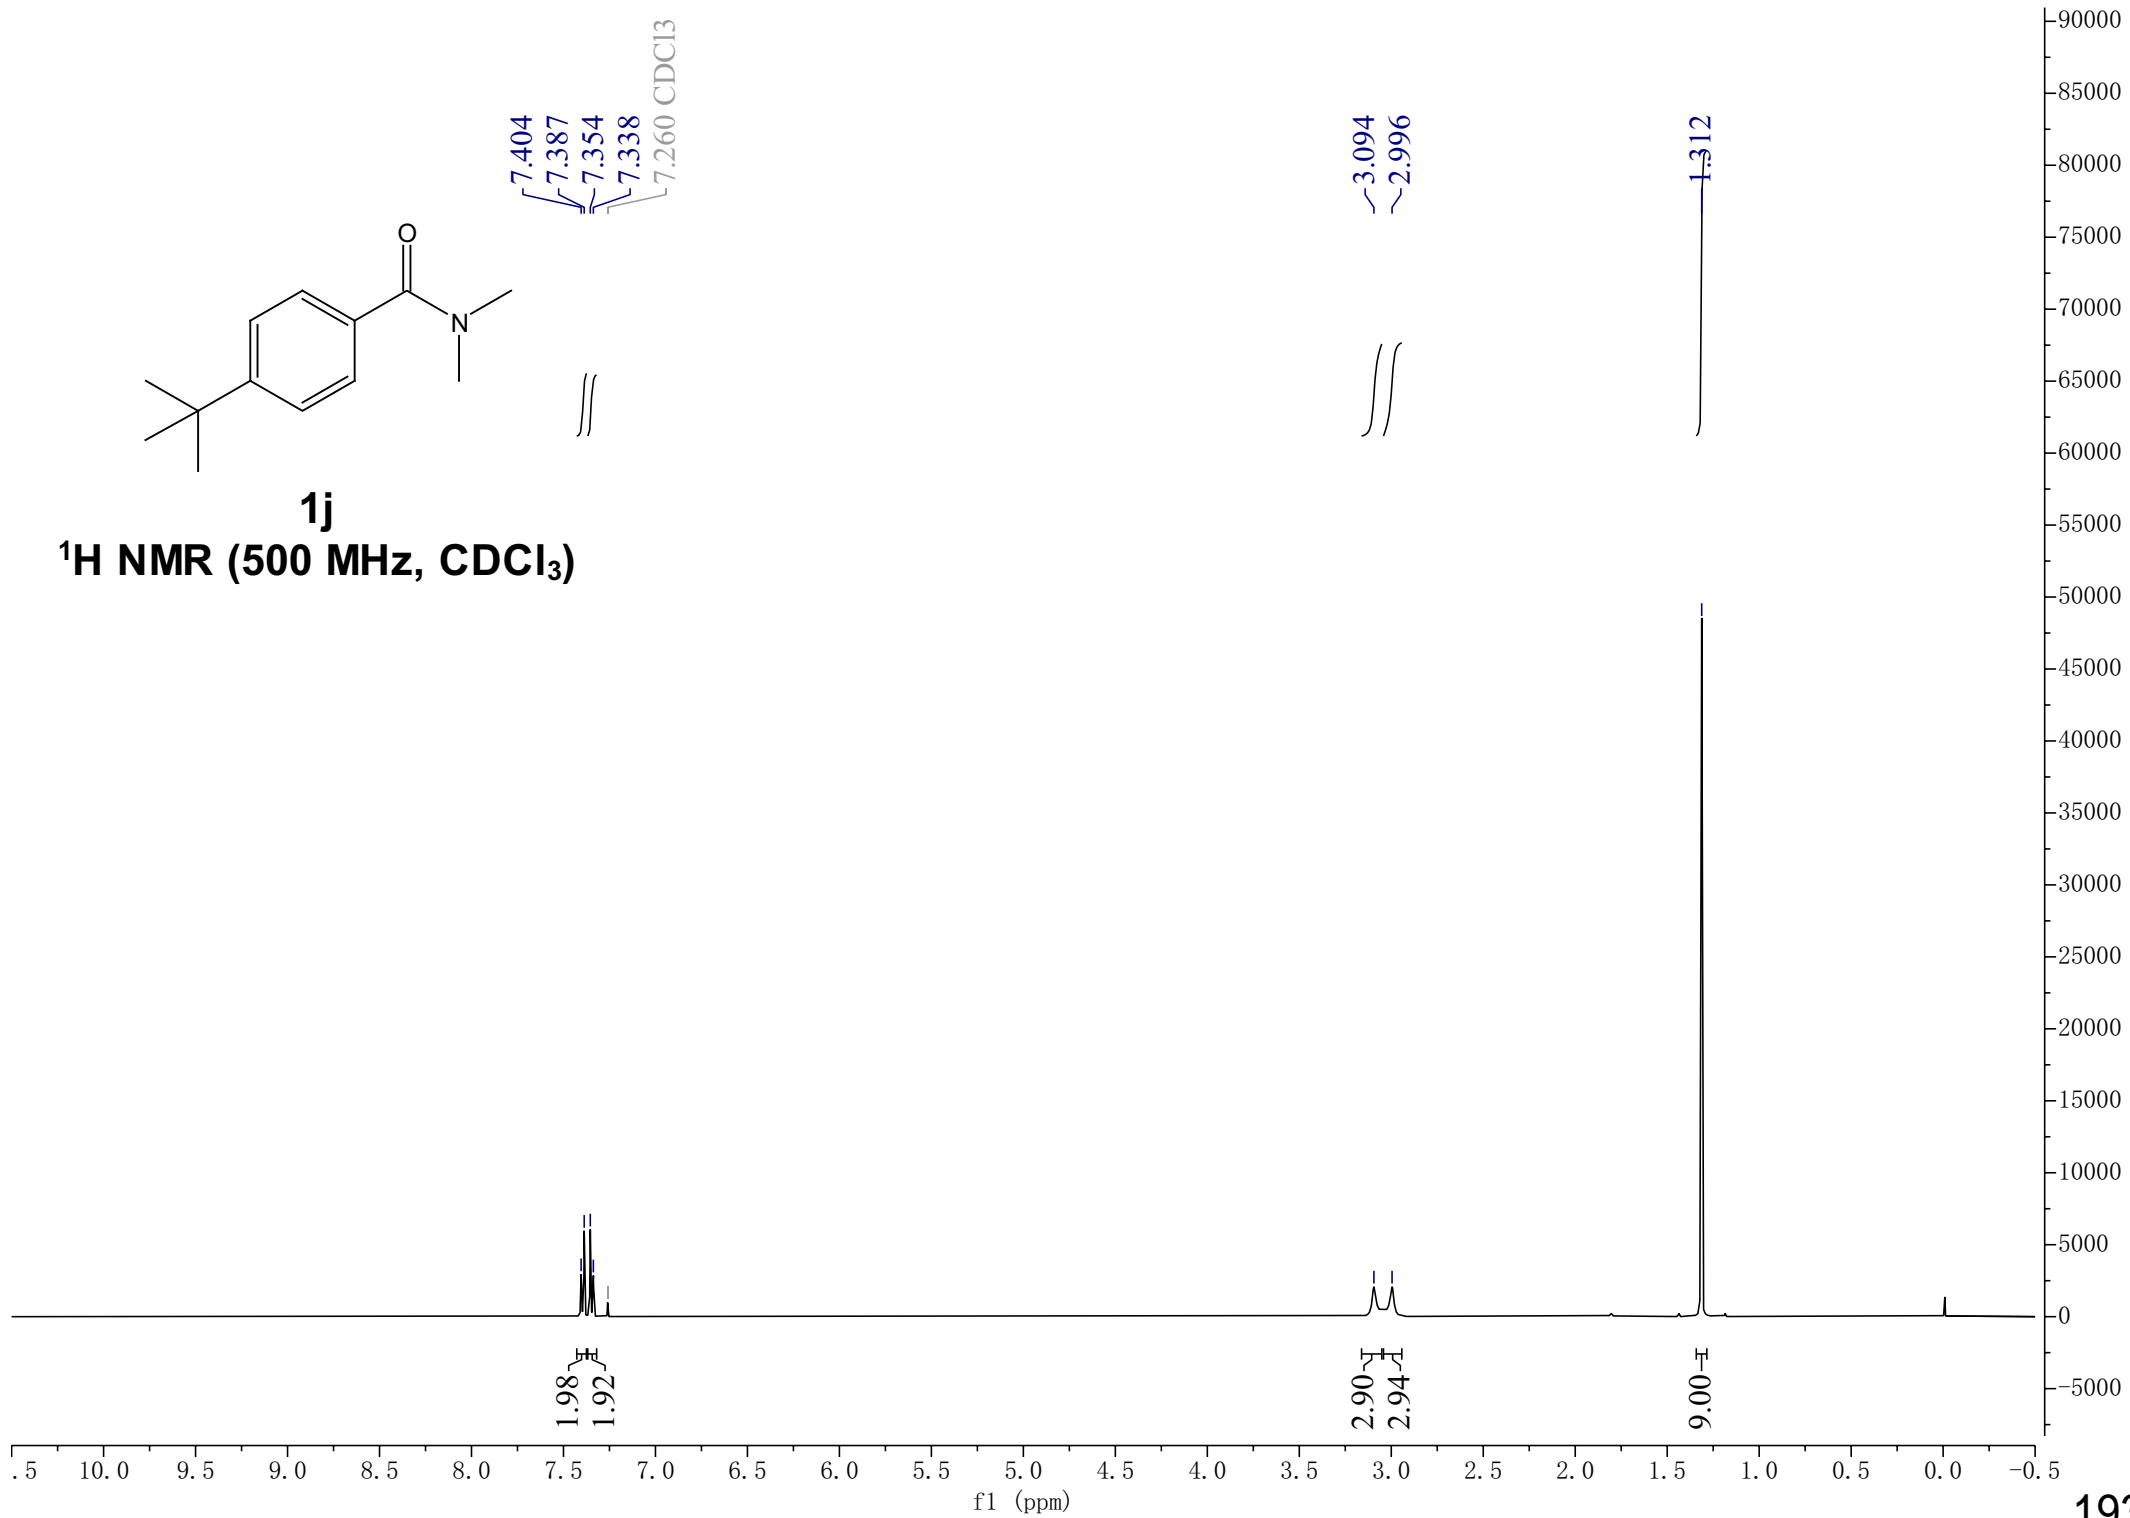

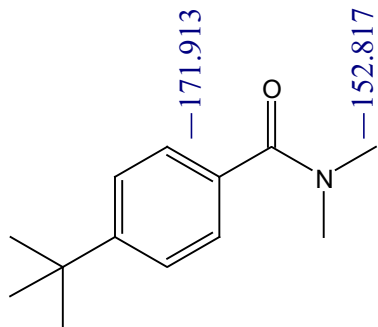

**1j**

**$^{13}\text{C}$  NMR (125 MHz,  $\text{CDCl}_3$ )**

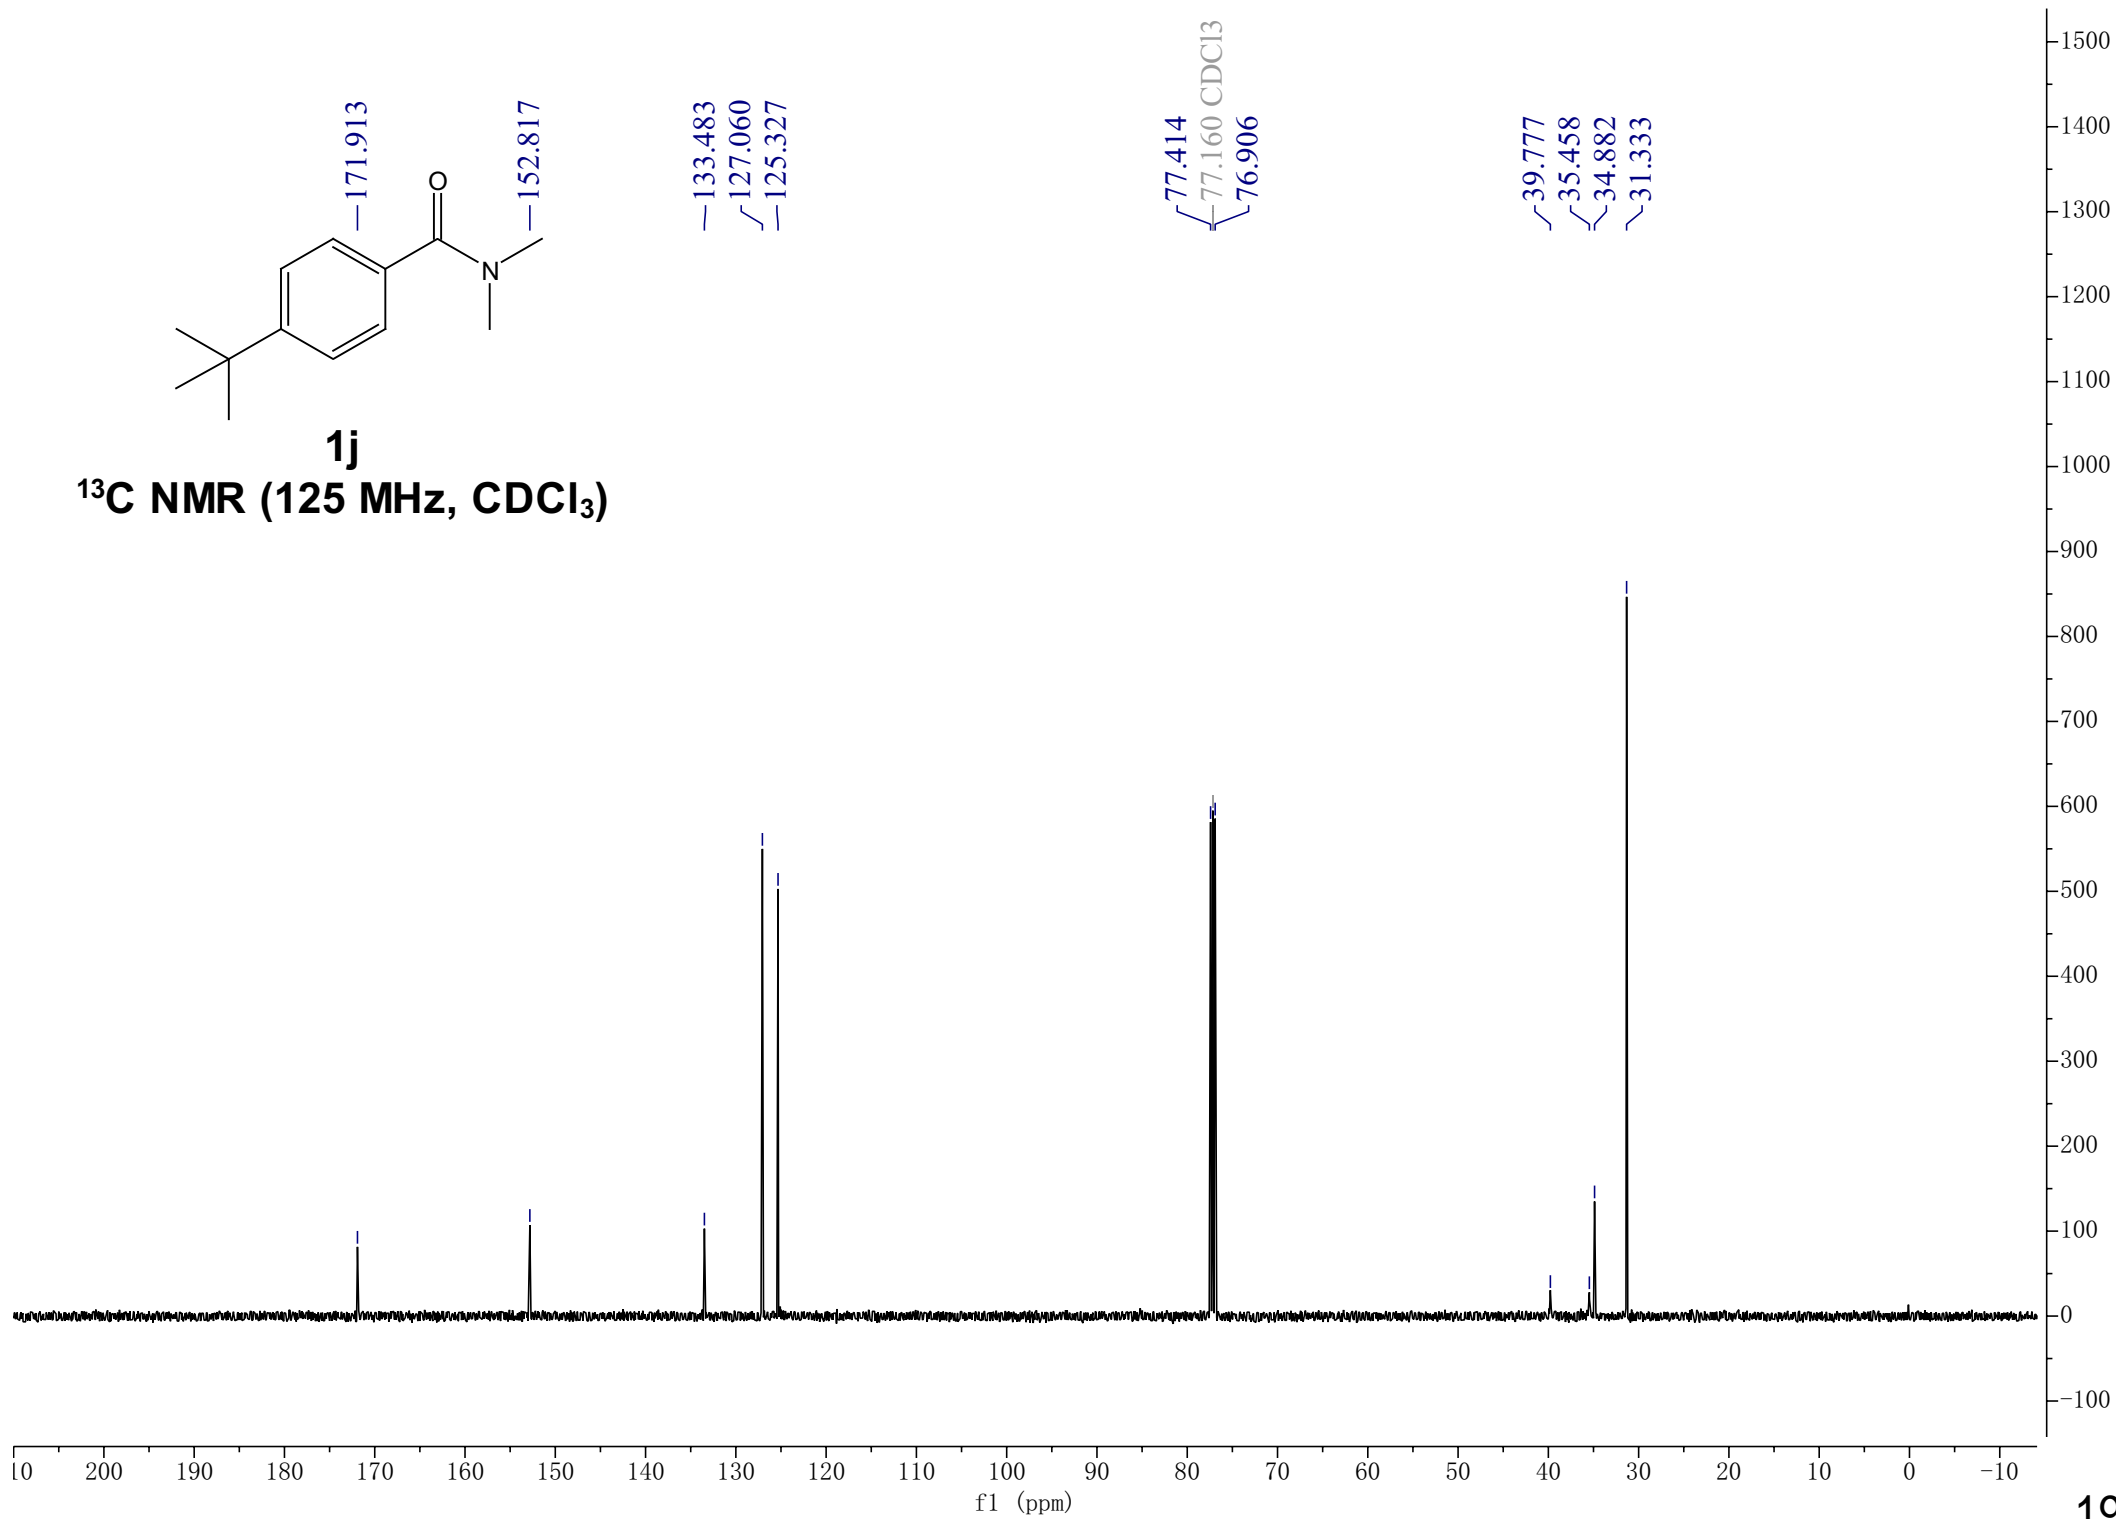

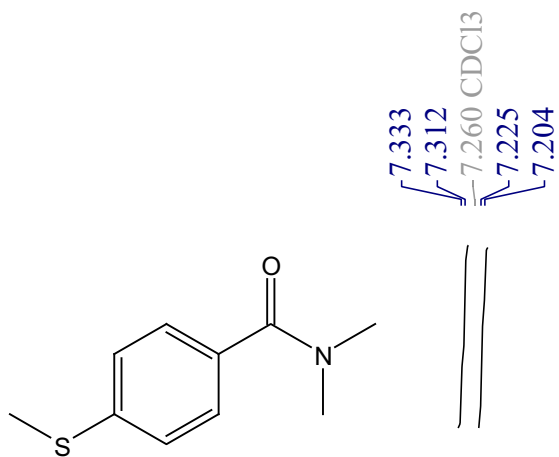

**1k**

**<sup>1</sup>H NMR (400 MHz, CDCl<sub>3</sub>)**

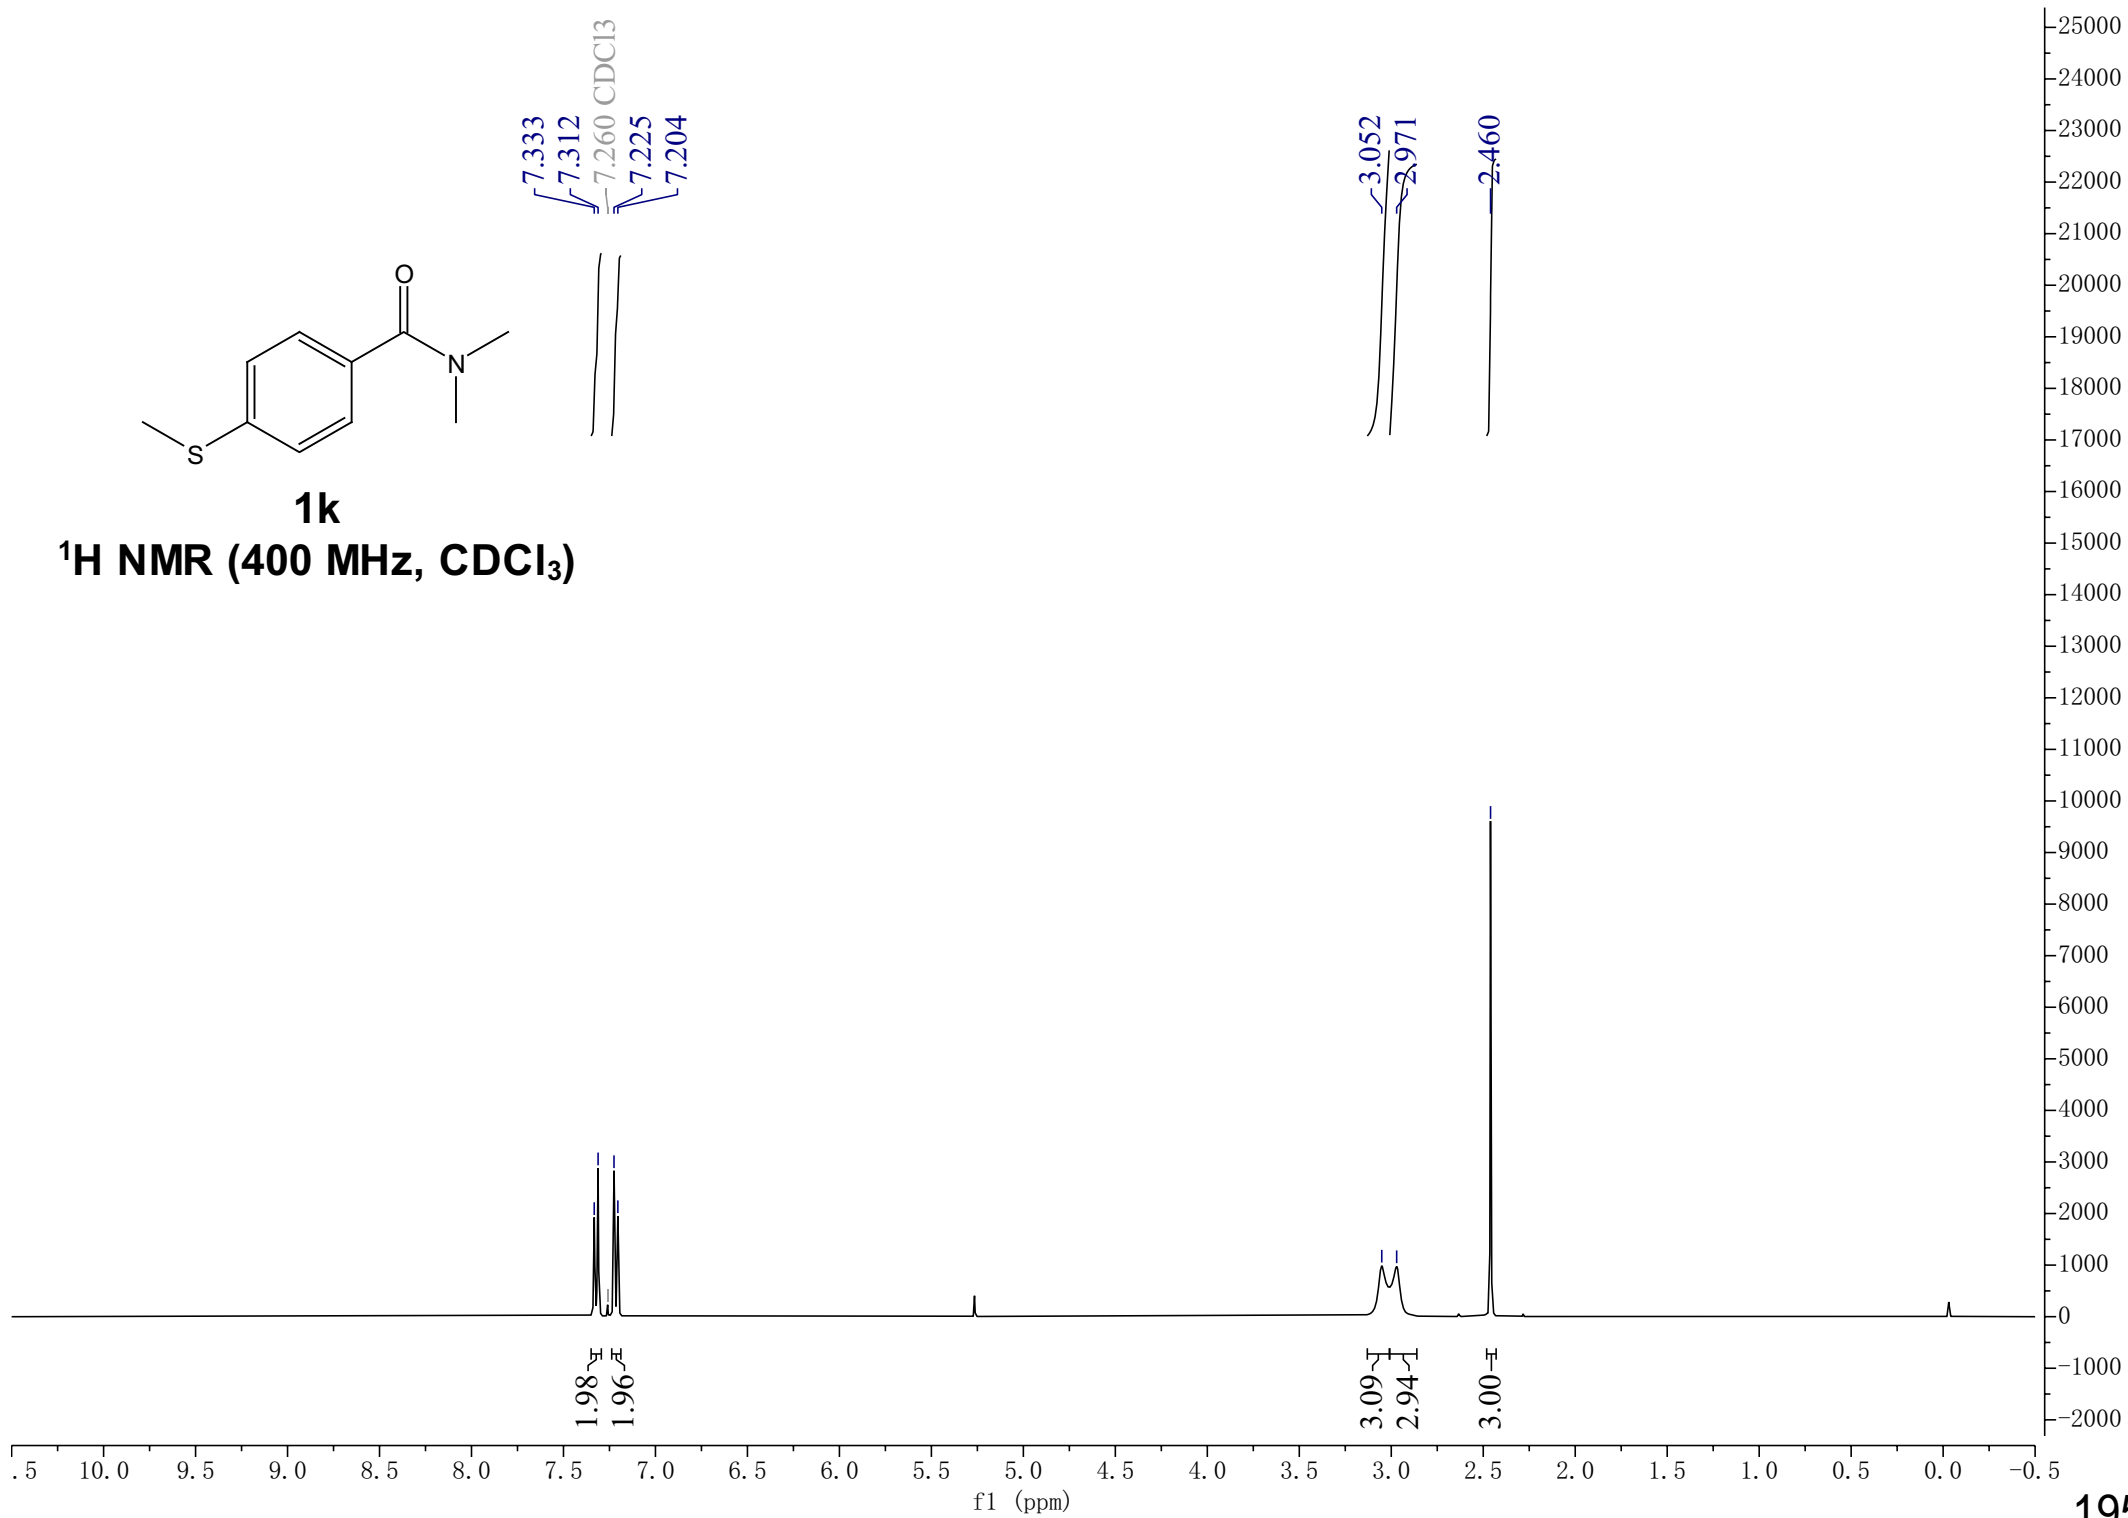

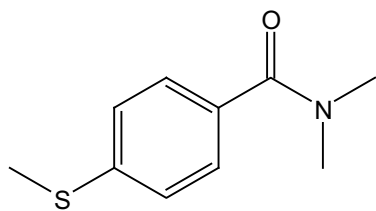

1k

<sup>13</sup>C NMR (100 MHz, CDCl<sub>3</sub>)

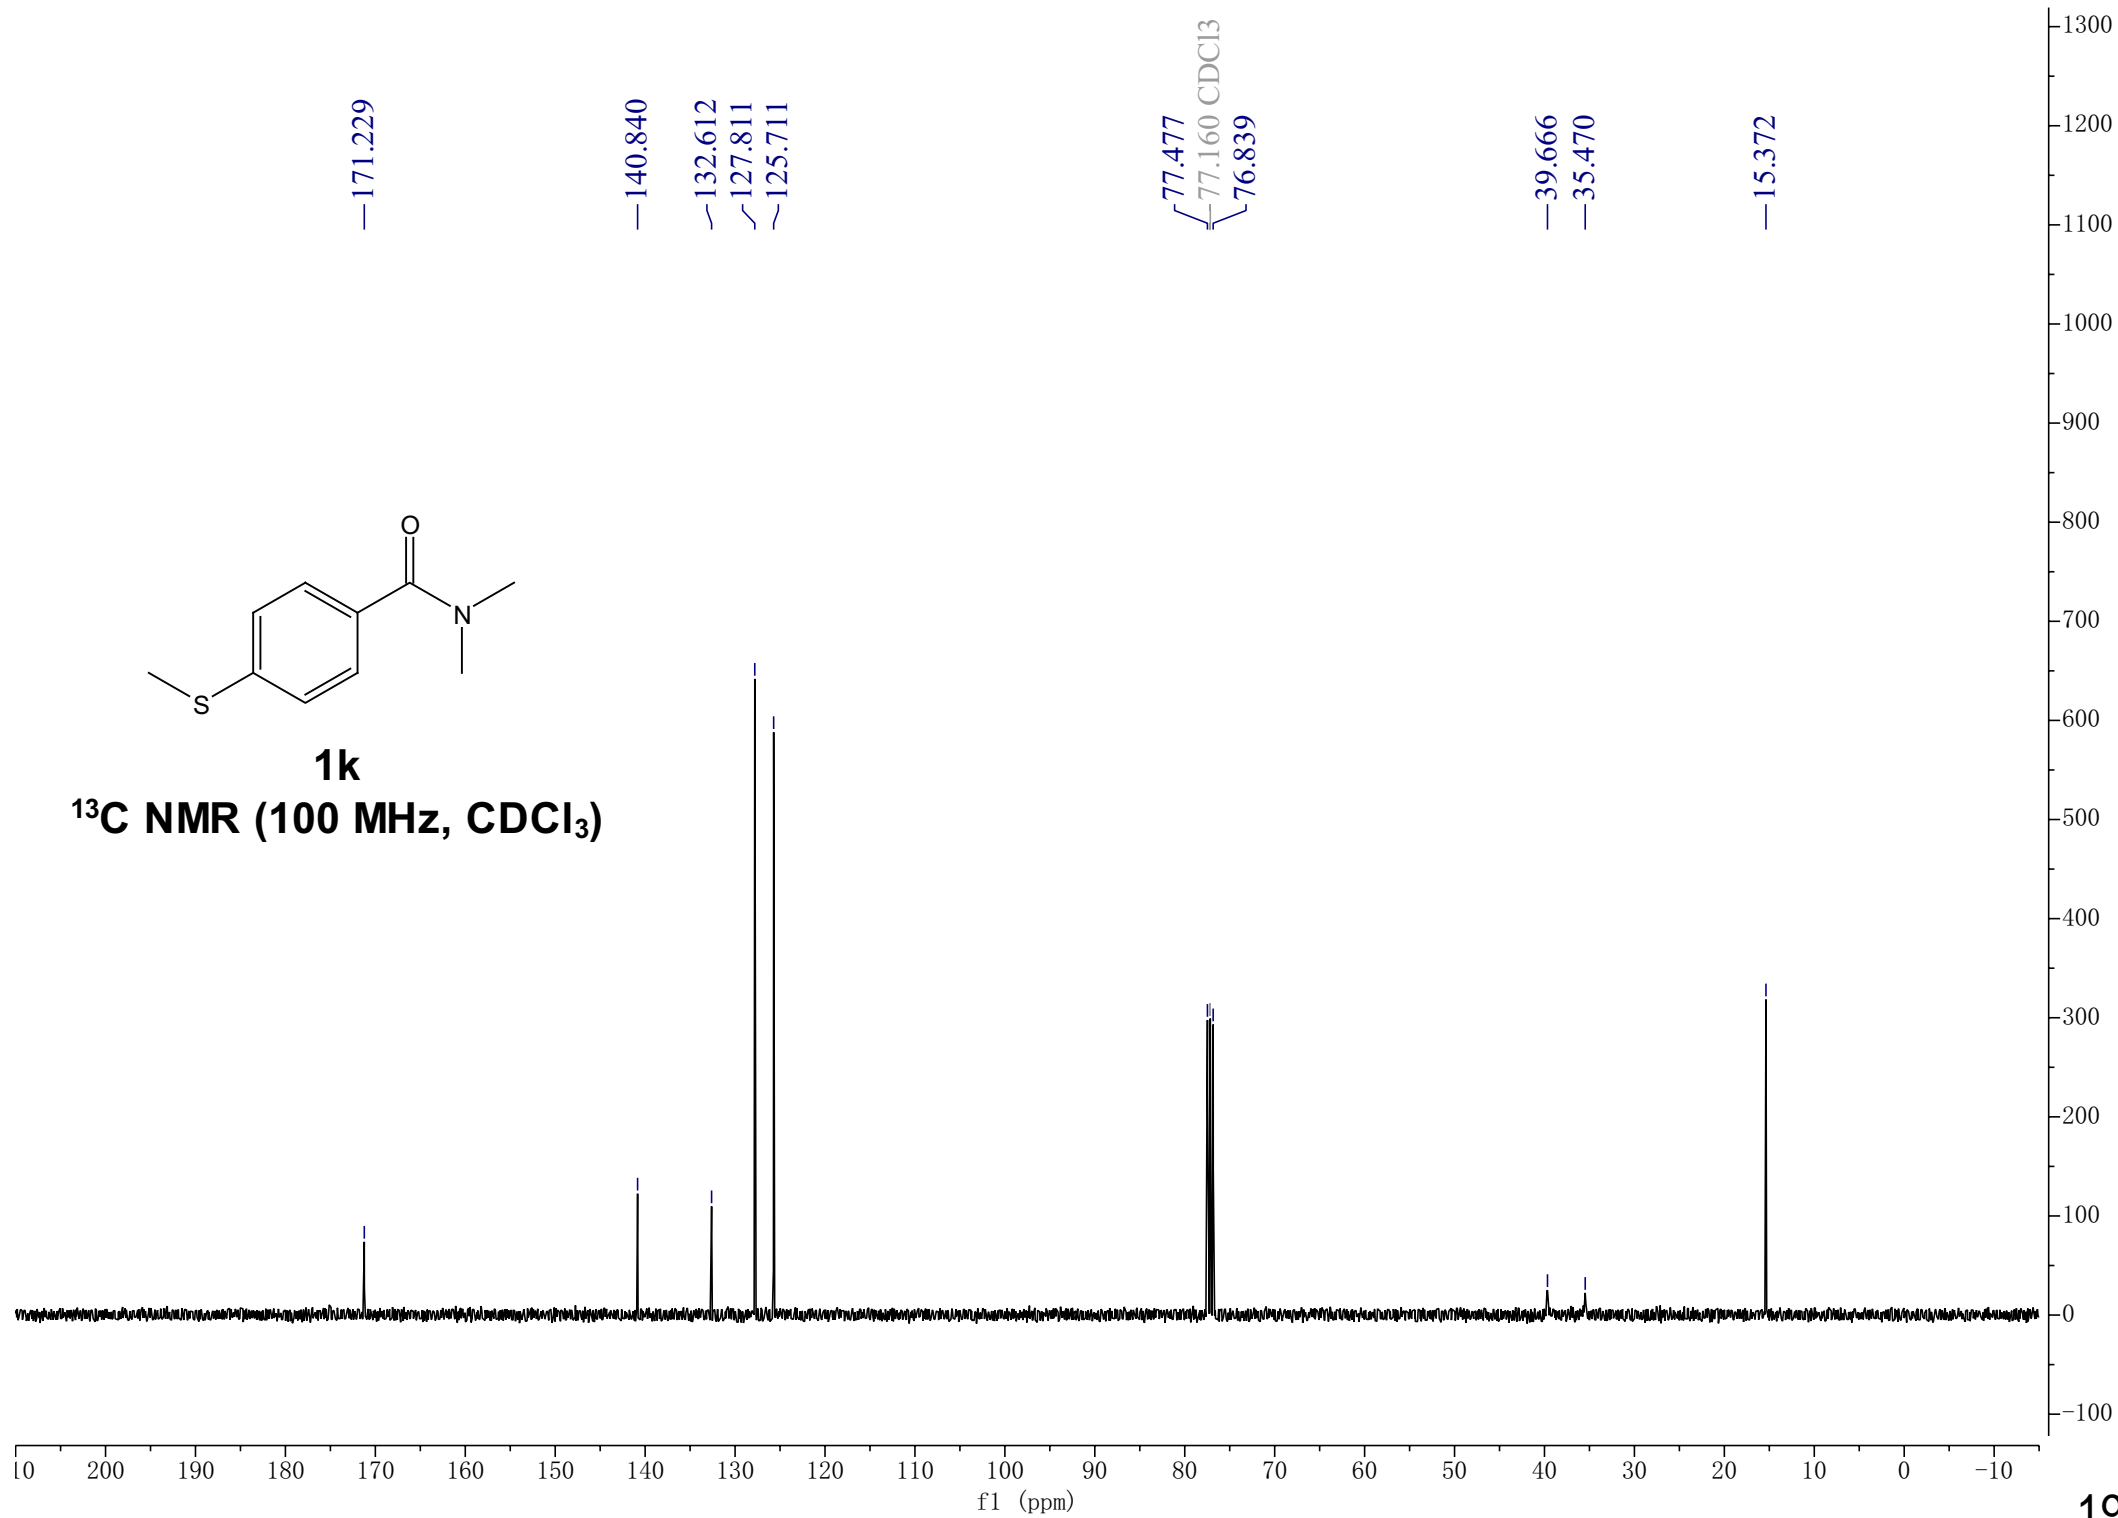

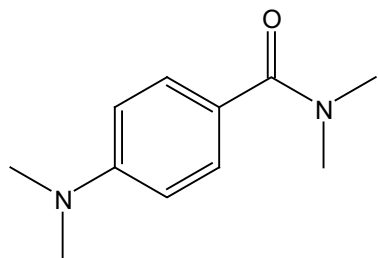

**11**

**<sup>1</sup>H NMR (400 MHz, CDCl<sub>3</sub>)**

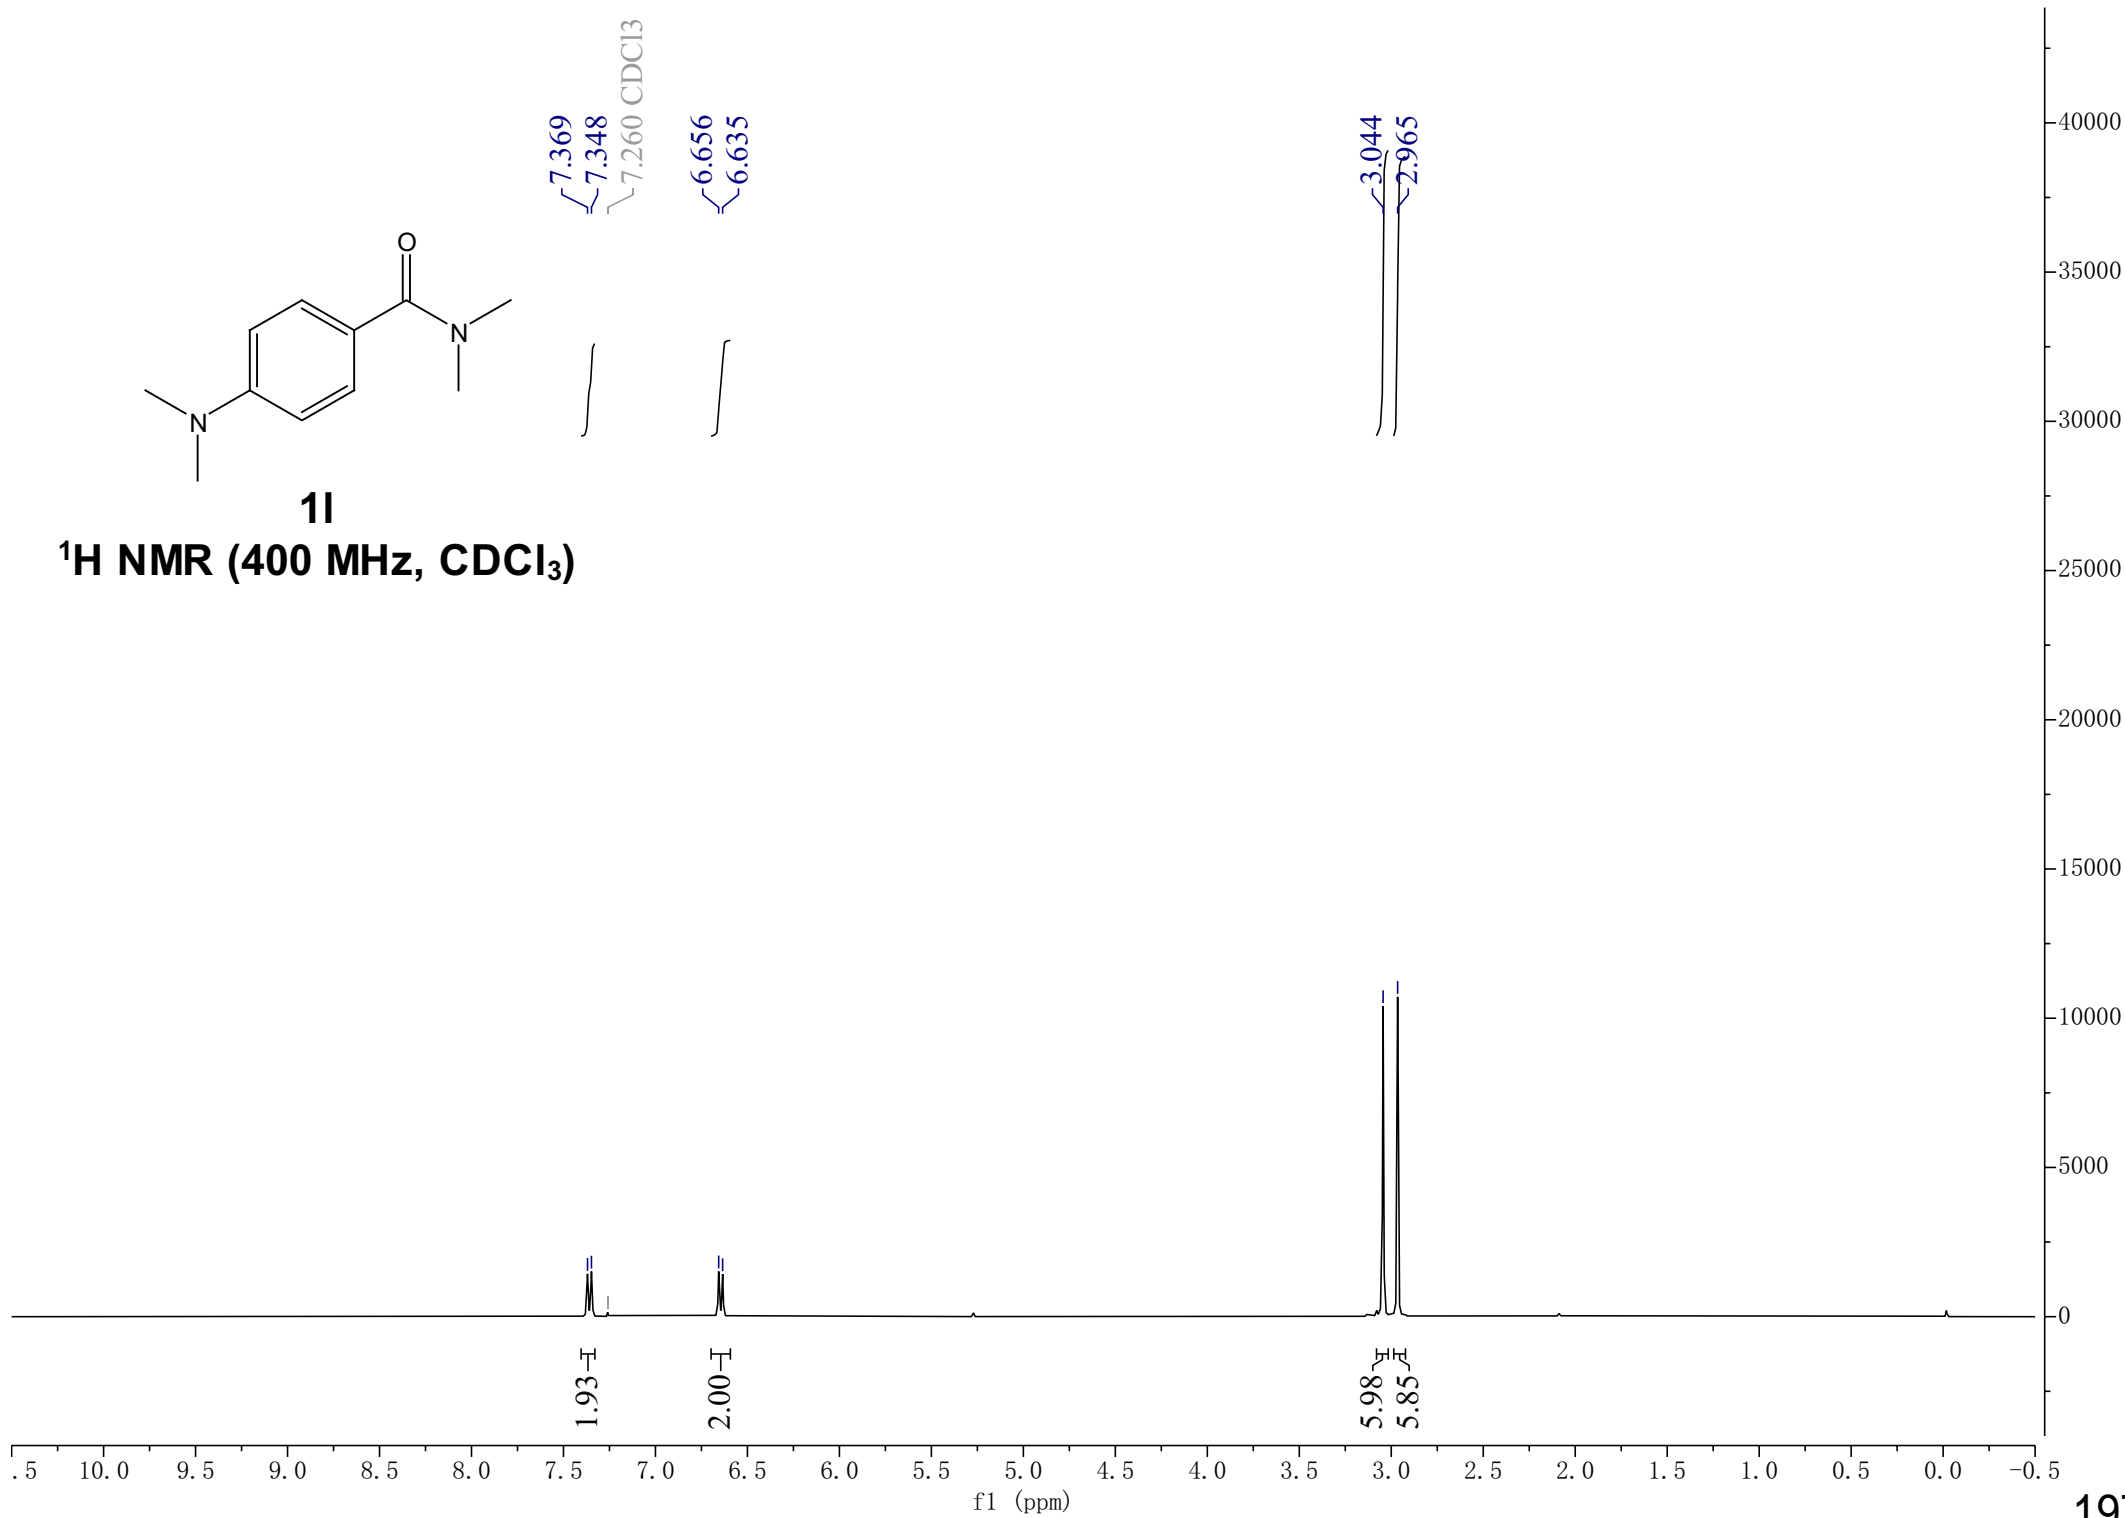

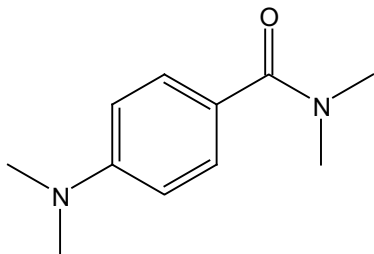

**11**

**<sup>13</sup>C NMR (100 MHz, CDCl<sub>3</sub>)**

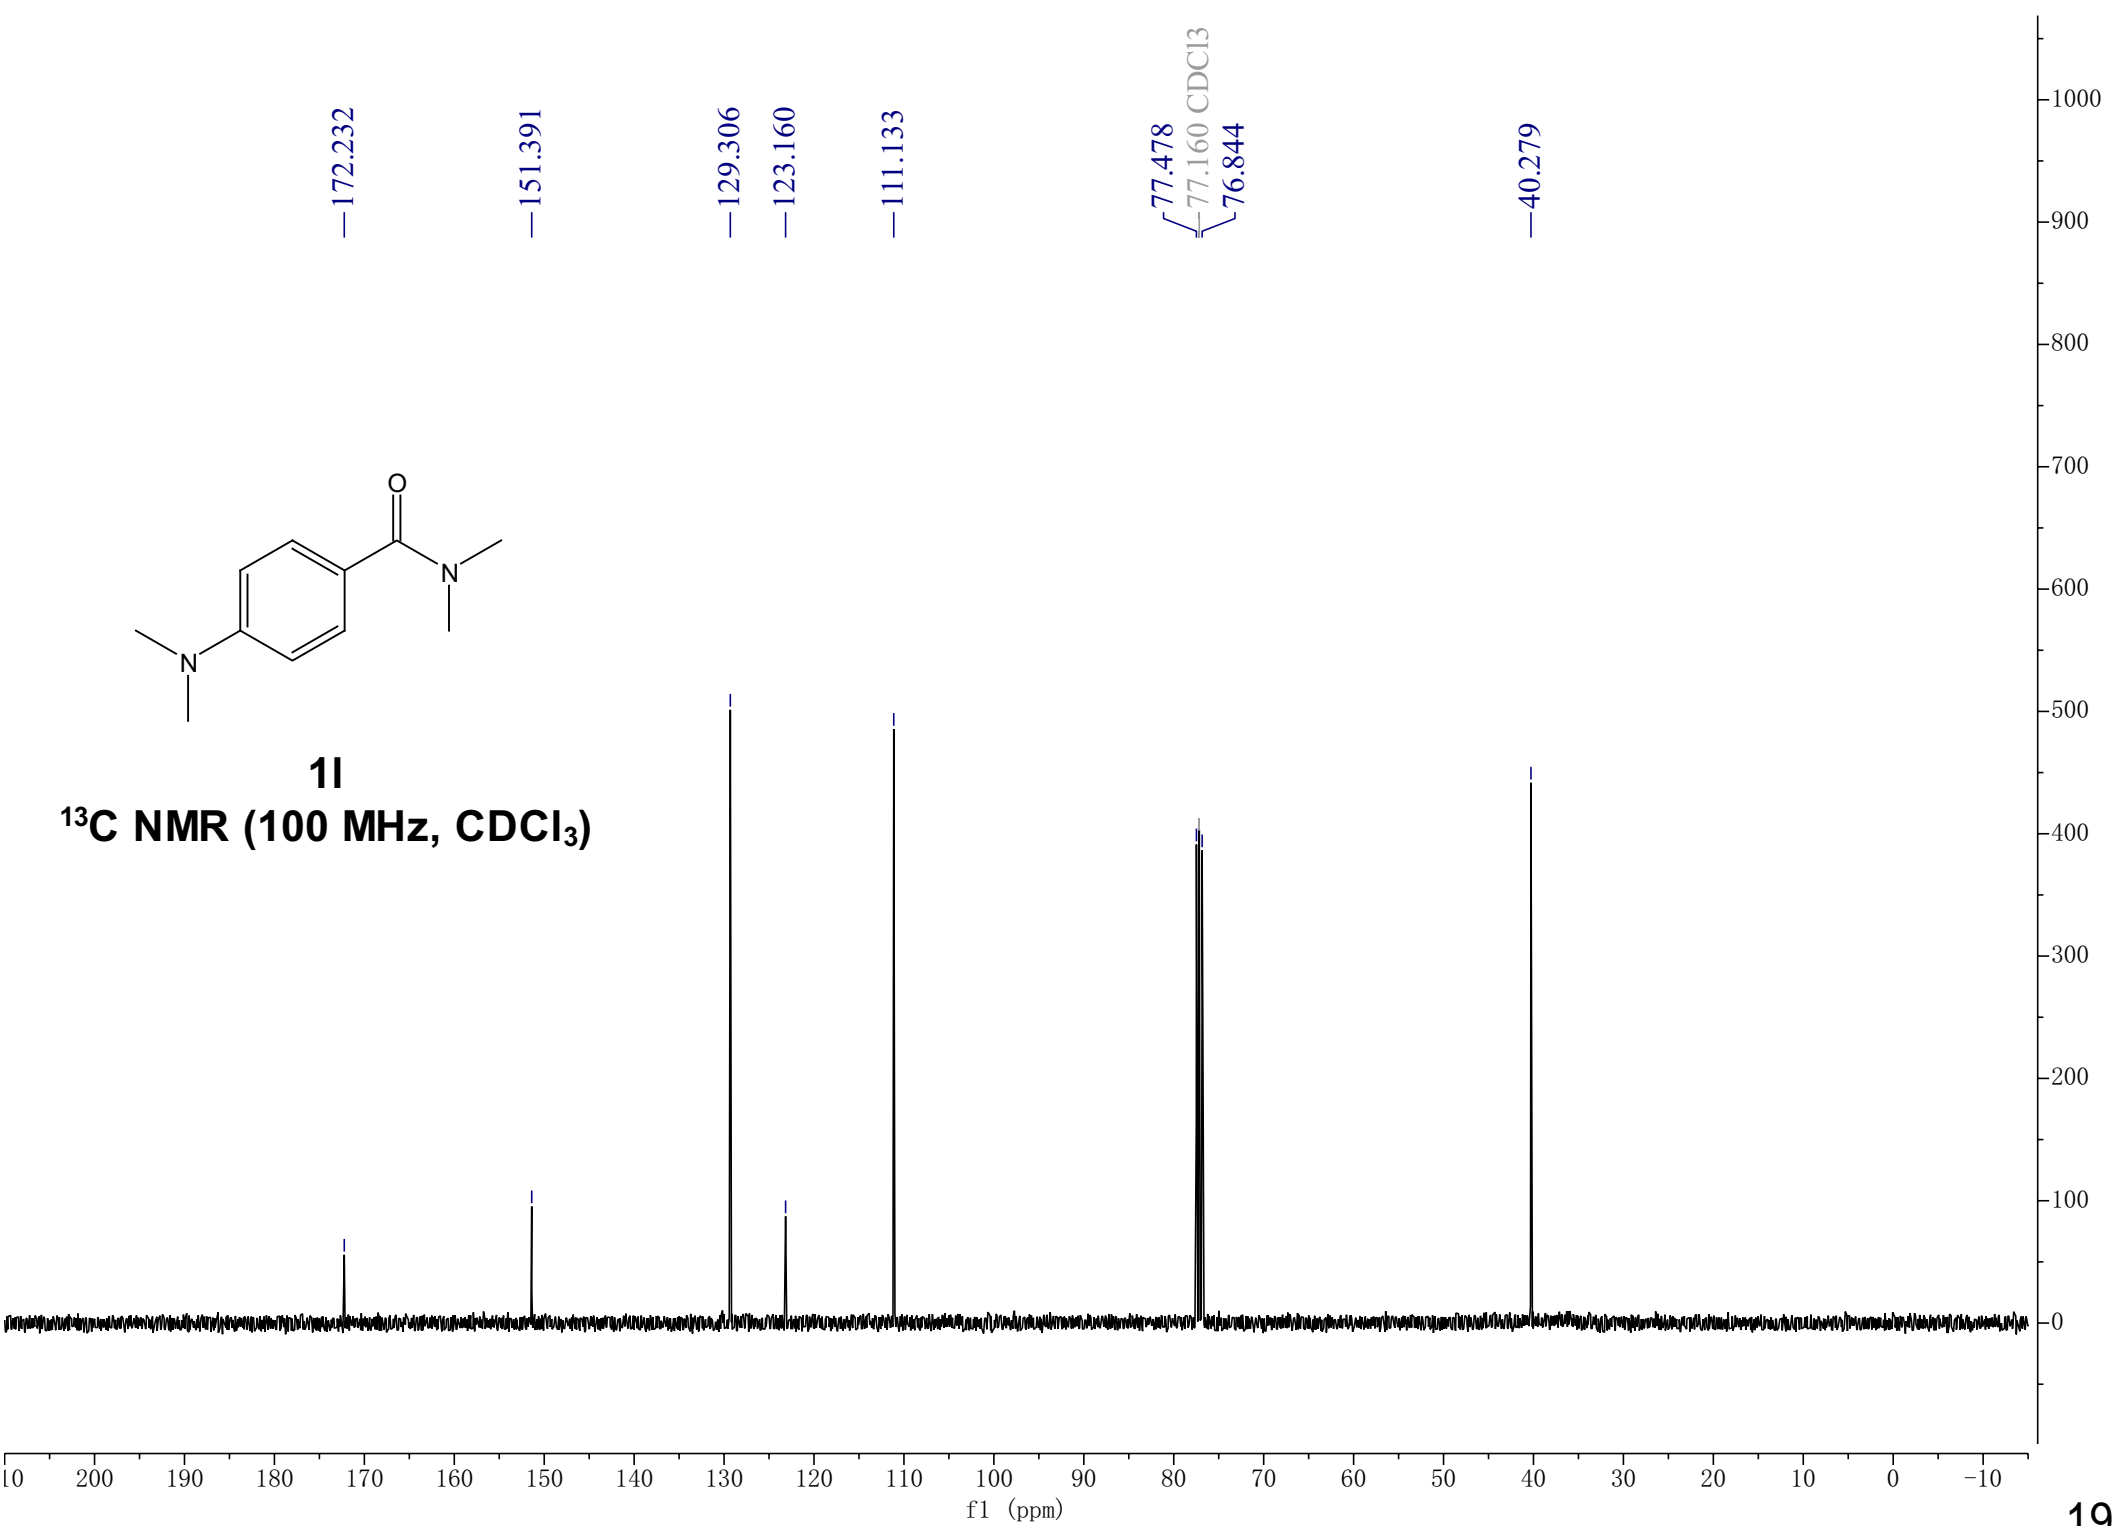

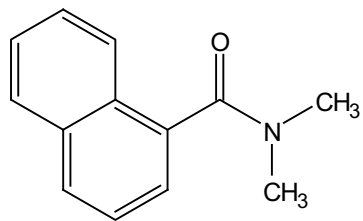

**1m**

**<sup>1</sup>H NMR (500 MHz, CDCl<sub>3</sub>)**

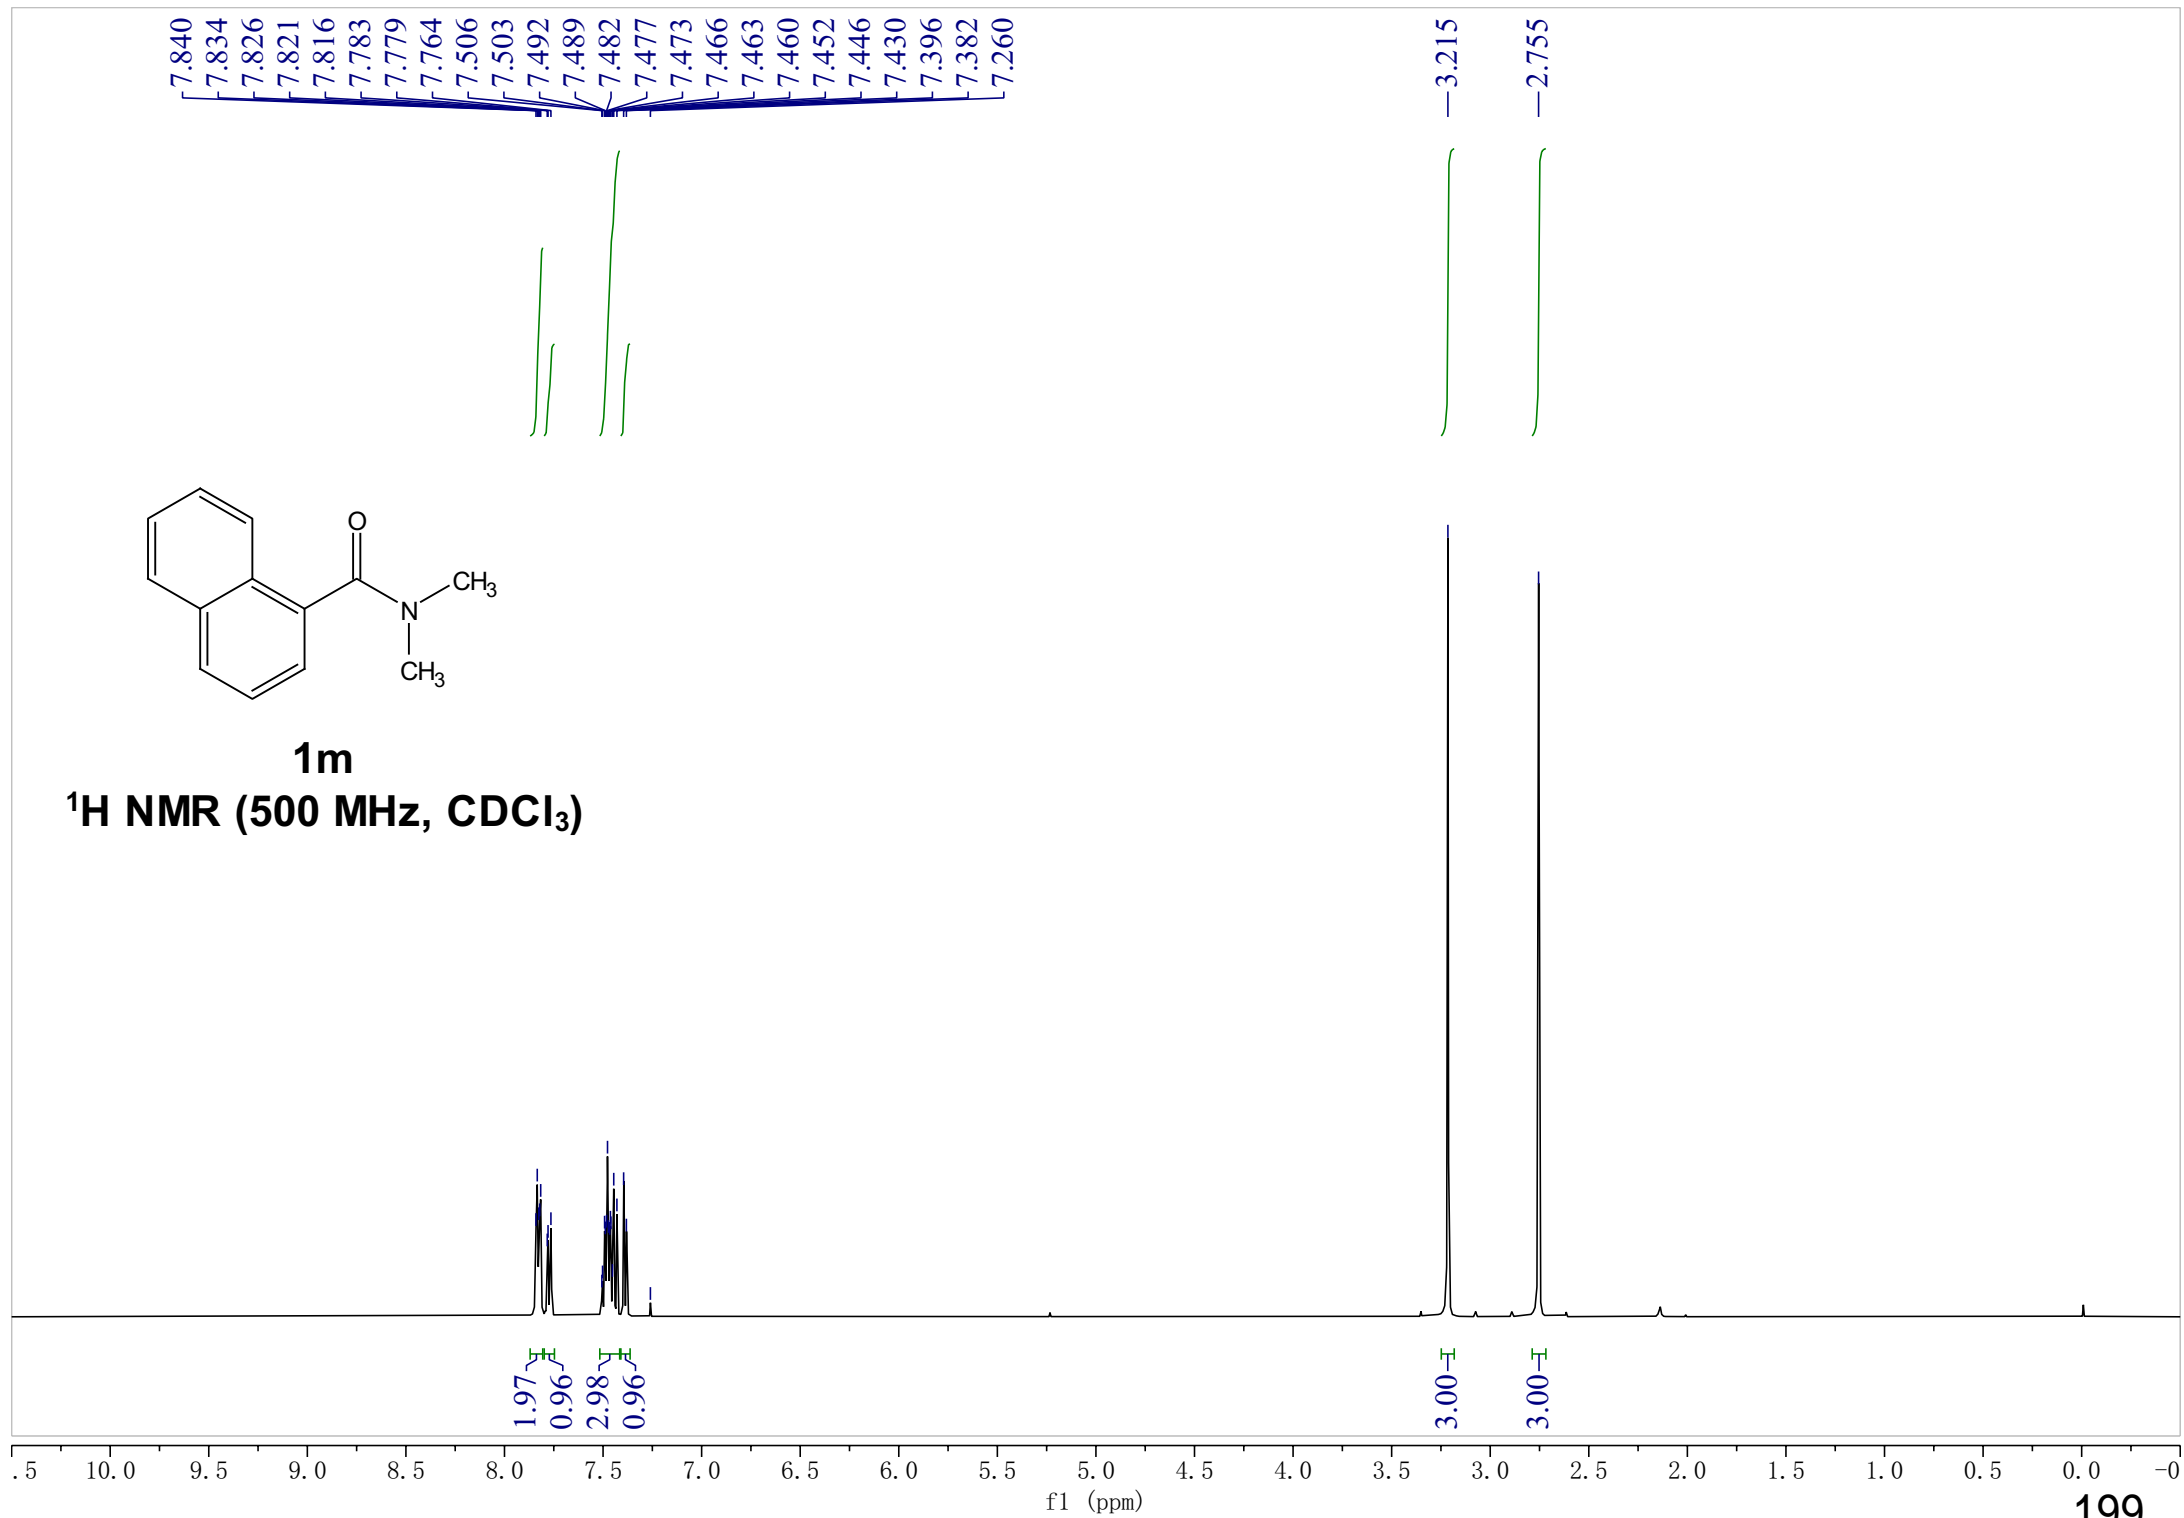



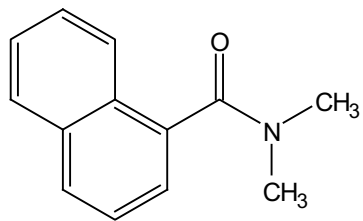

**1m**

**<sup>13</sup>C NMR (125 MHz, CDCl<sub>3</sub>)**

—170.811

—134.736

—133.410

—129.437

—128.951

—128.361

—126.906

—126.299

—125.151

—124.808

—123.818

—77.415

—77.159

—76.906

—38.784

—34.785

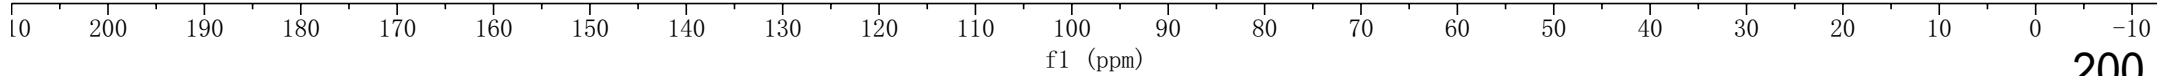

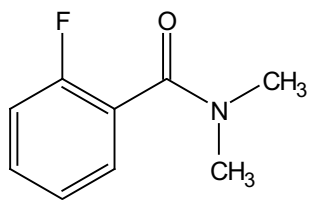

**1n**

**<sup>1</sup>H NMR (500 MHz, CDCl<sub>3</sub>)**

7.333  
7.321  
7.308  
7.293  
7.260  
7.140  
7.125  
7.110  
7.033  
7.015  
6.997

3.054  
2.855

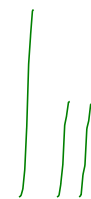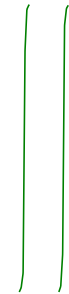

1.96  
1.00  
0.98

3.00  
2.99

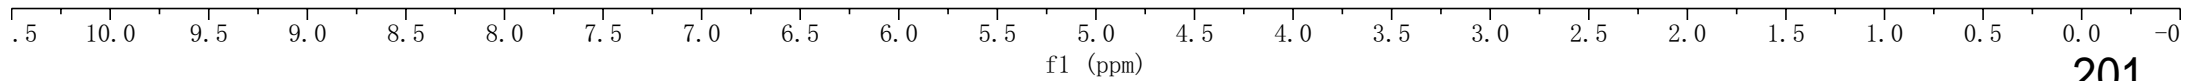



**1n**

**$^{13}\text{C}$  NMR (125 MHz,  $\text{CDCl}_3$ )**

~166.682  
~159.073  
~157.105

131.147  
131.084  
128.967  
128.937  
124.673  
124.567  
124.539  
115.737  
115.566

77.415  
77.161  
76.905

38.244  
38.222  
34.857

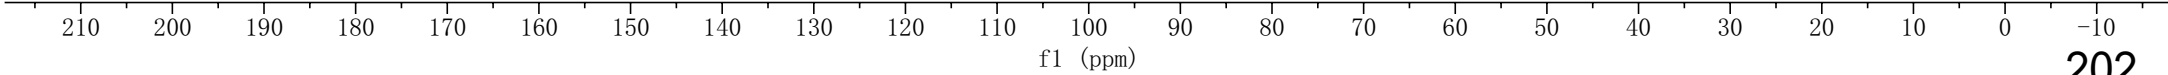

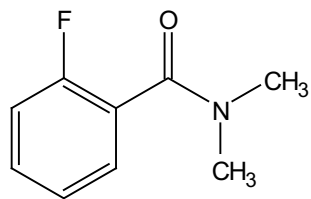

**1n**

**$^{19}\text{F}$  NMR (470 MHz,  $\text{CDCl}_3$ )**

—115.335

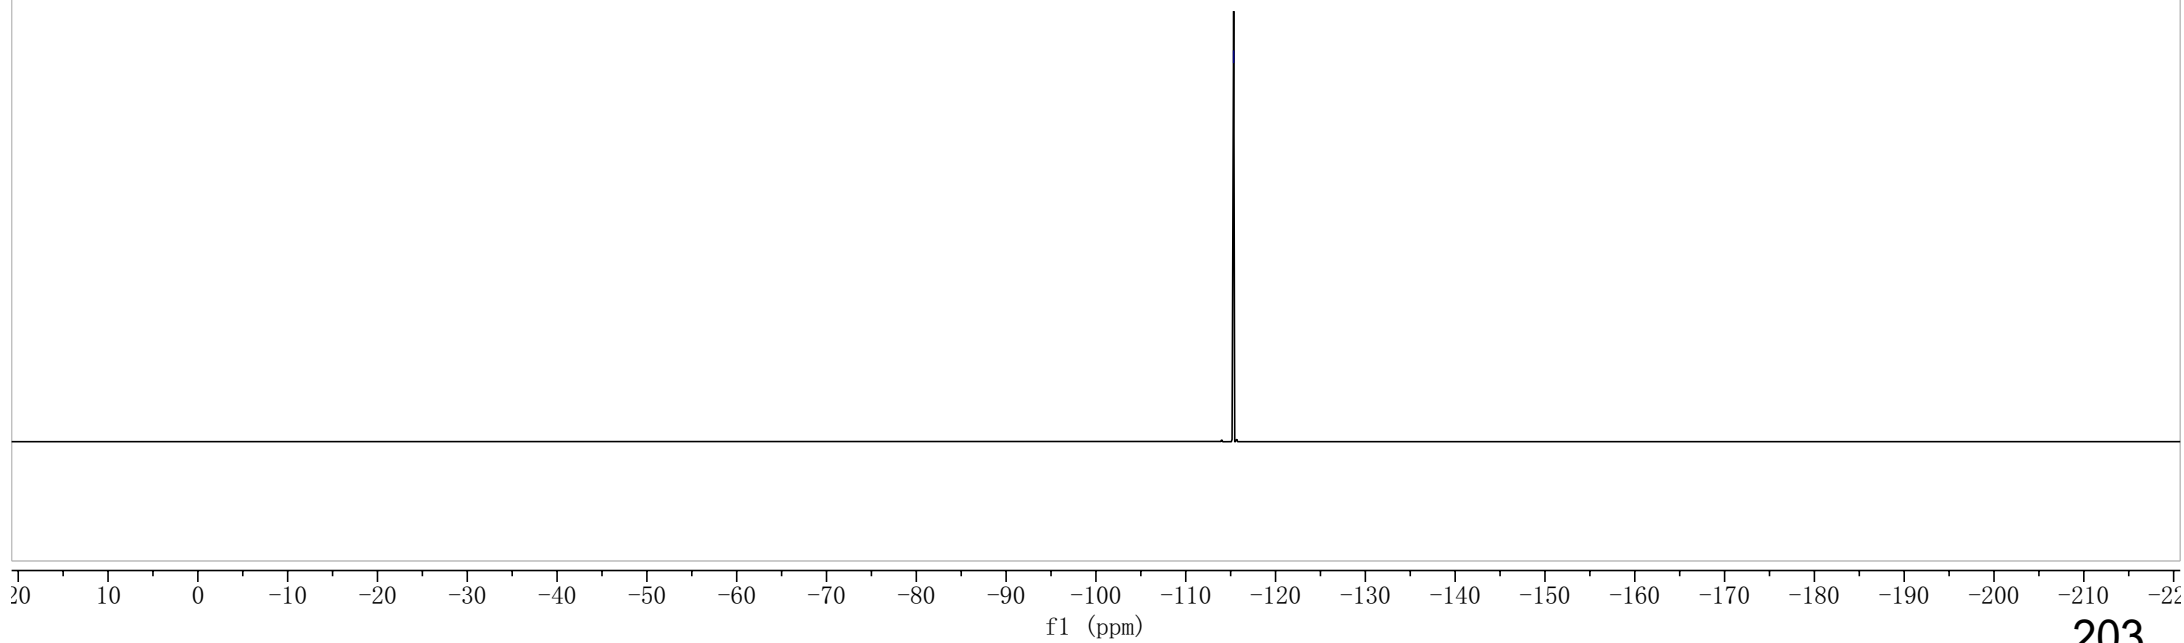

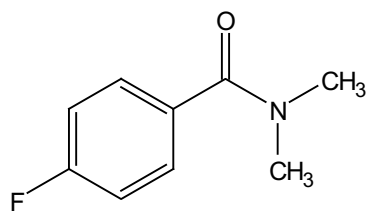

**1o**

**<sup>1</sup>H NMR (500 MHz, CDCl<sub>3</sub>)**

7.430  
7.426  
7.420  
7.413  
7.407  
7.403  
7.260  
7.088  
7.071  
7.066  
7.053

3.087  
2.976

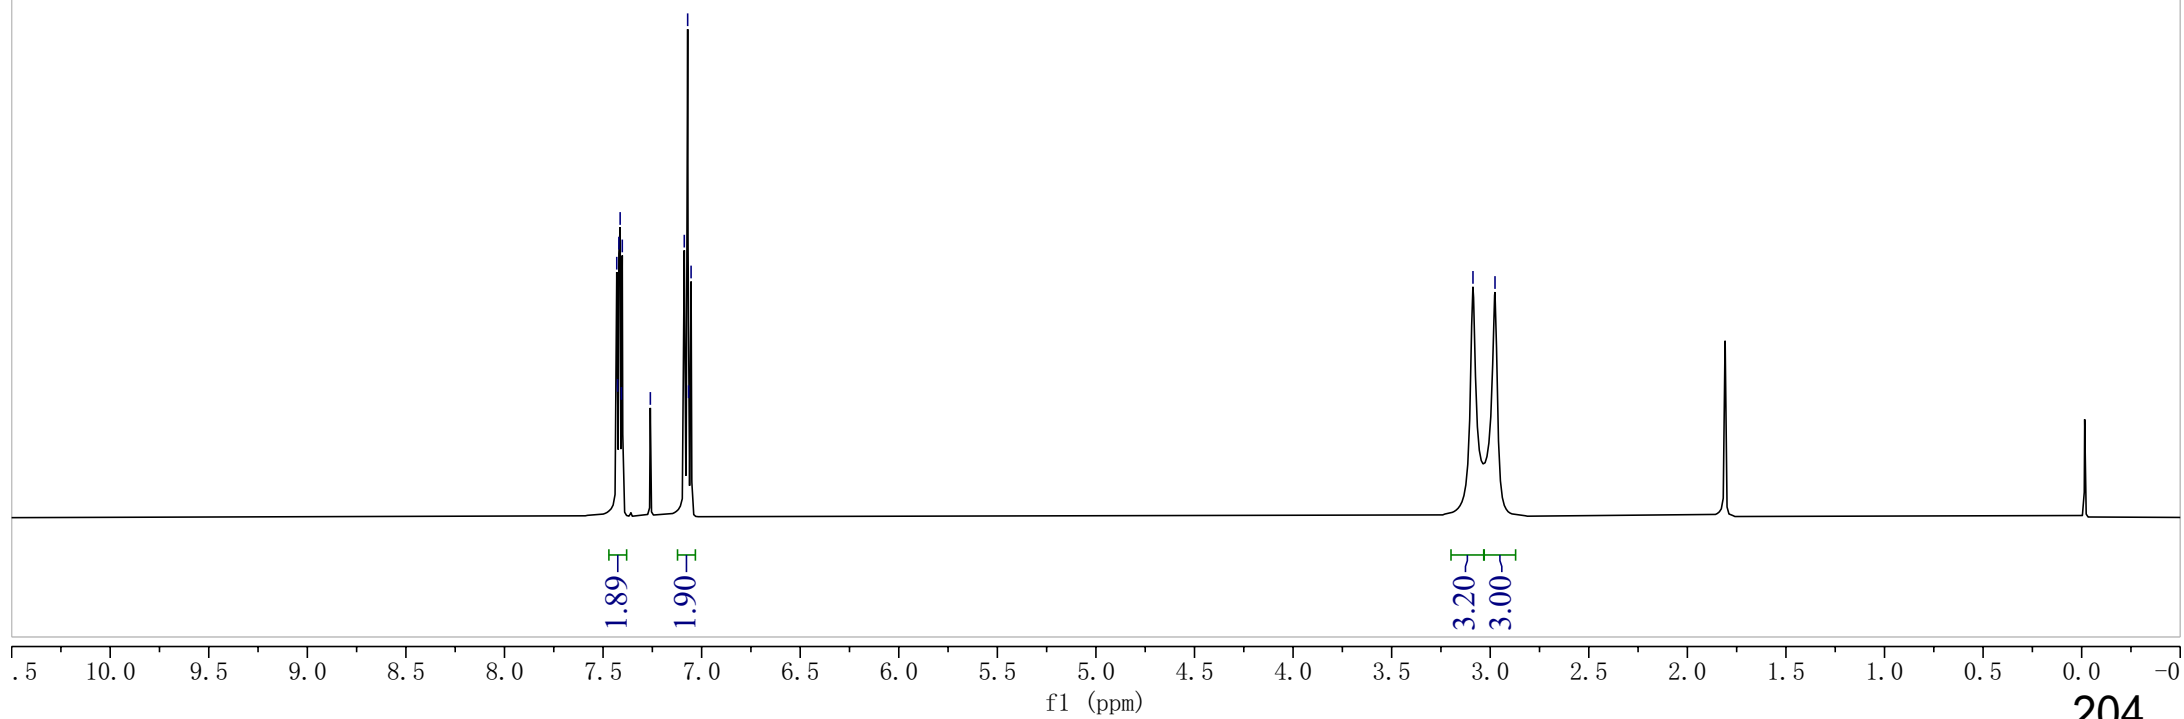

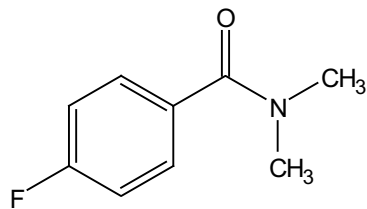

**1o**

**<sup>13</sup>C NMR (125 MHz, CDCl<sub>3</sub>)**

~170.806  
~164.398  
~162.414

~132.436  
~132.409  
~129.511  
~129.443

~115.597  
~115.424

~77.414  
~77.160  
~76.906

~39.759  
~35.599

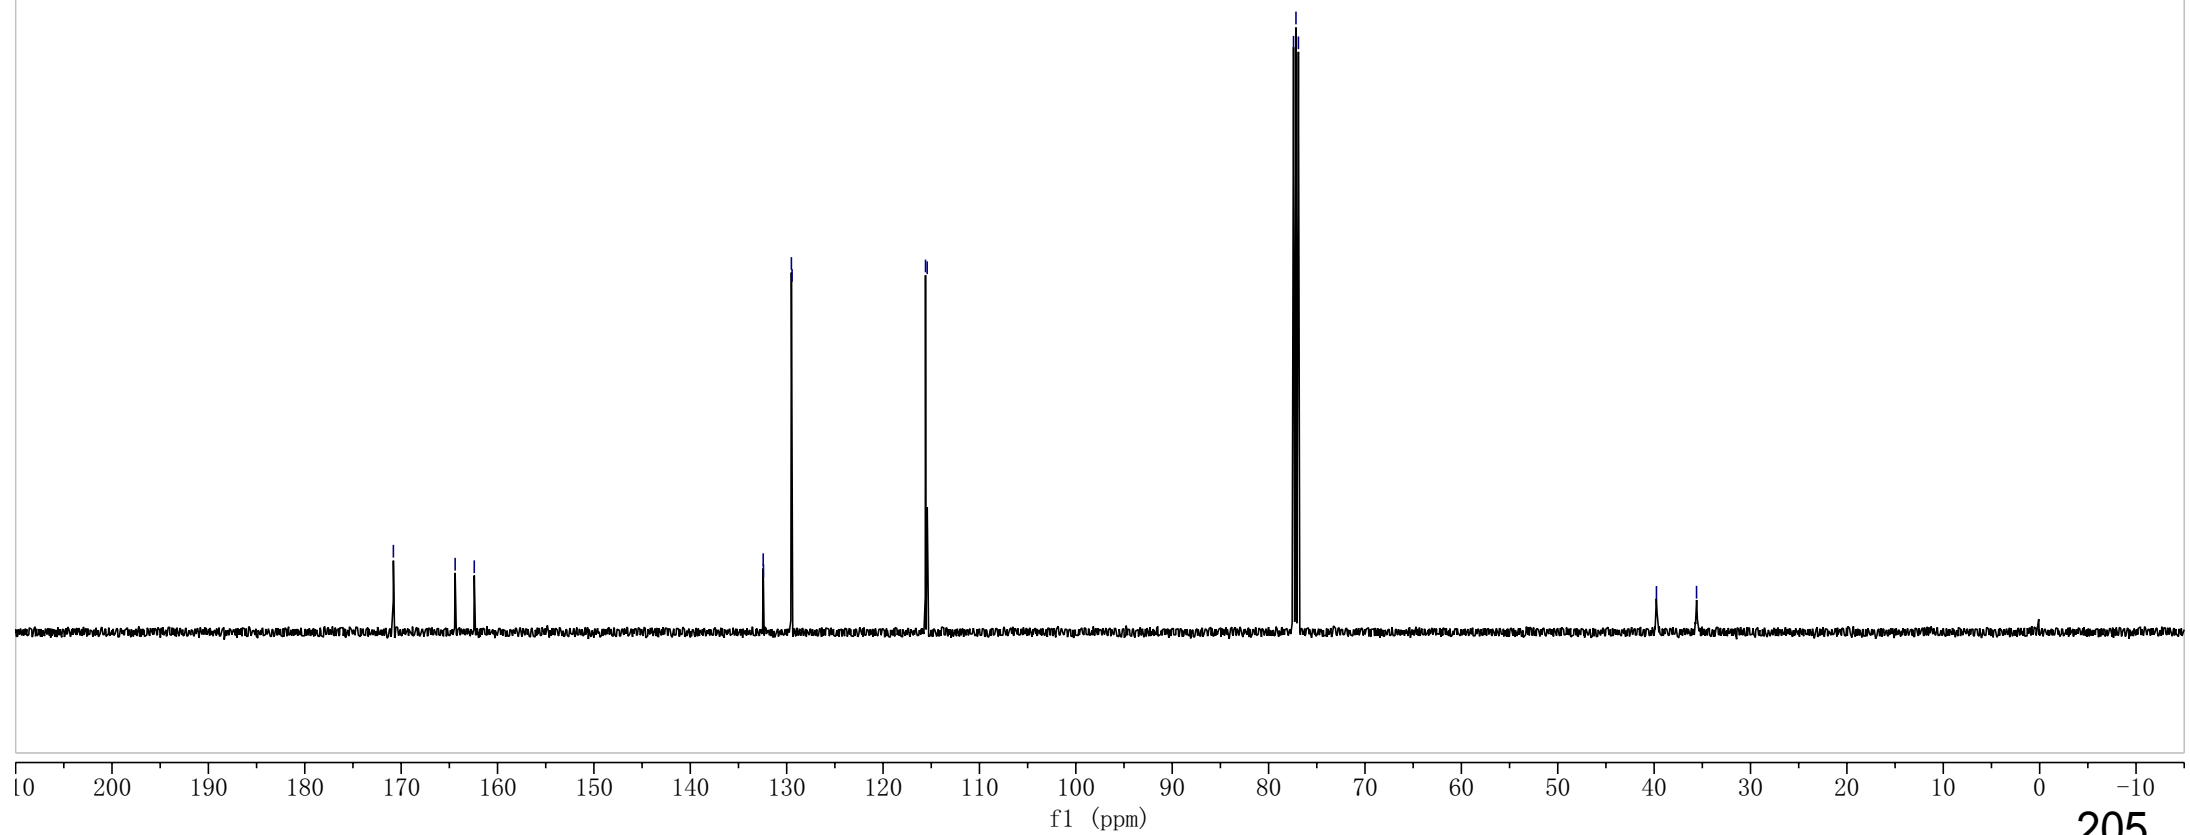



**1o**

**$^{19}\text{F}$  NMR (470 MHz,  $\text{CDCl}_3$ )**

--110.774

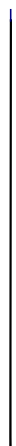

20 10 0 -10 -20 -30 -40 -50 -60 -70 -80 -90 -100 -110 -120 -130 -140 -150 -160 -170 -180 -190 -200 -210 -220  
f1 (ppm)

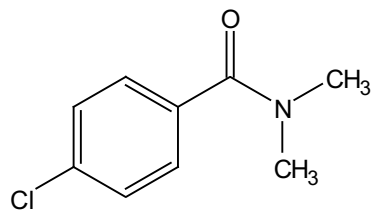

**1p**

**<sup>1</sup>H NMR (500 MHz, CDCl<sub>3</sub>)**

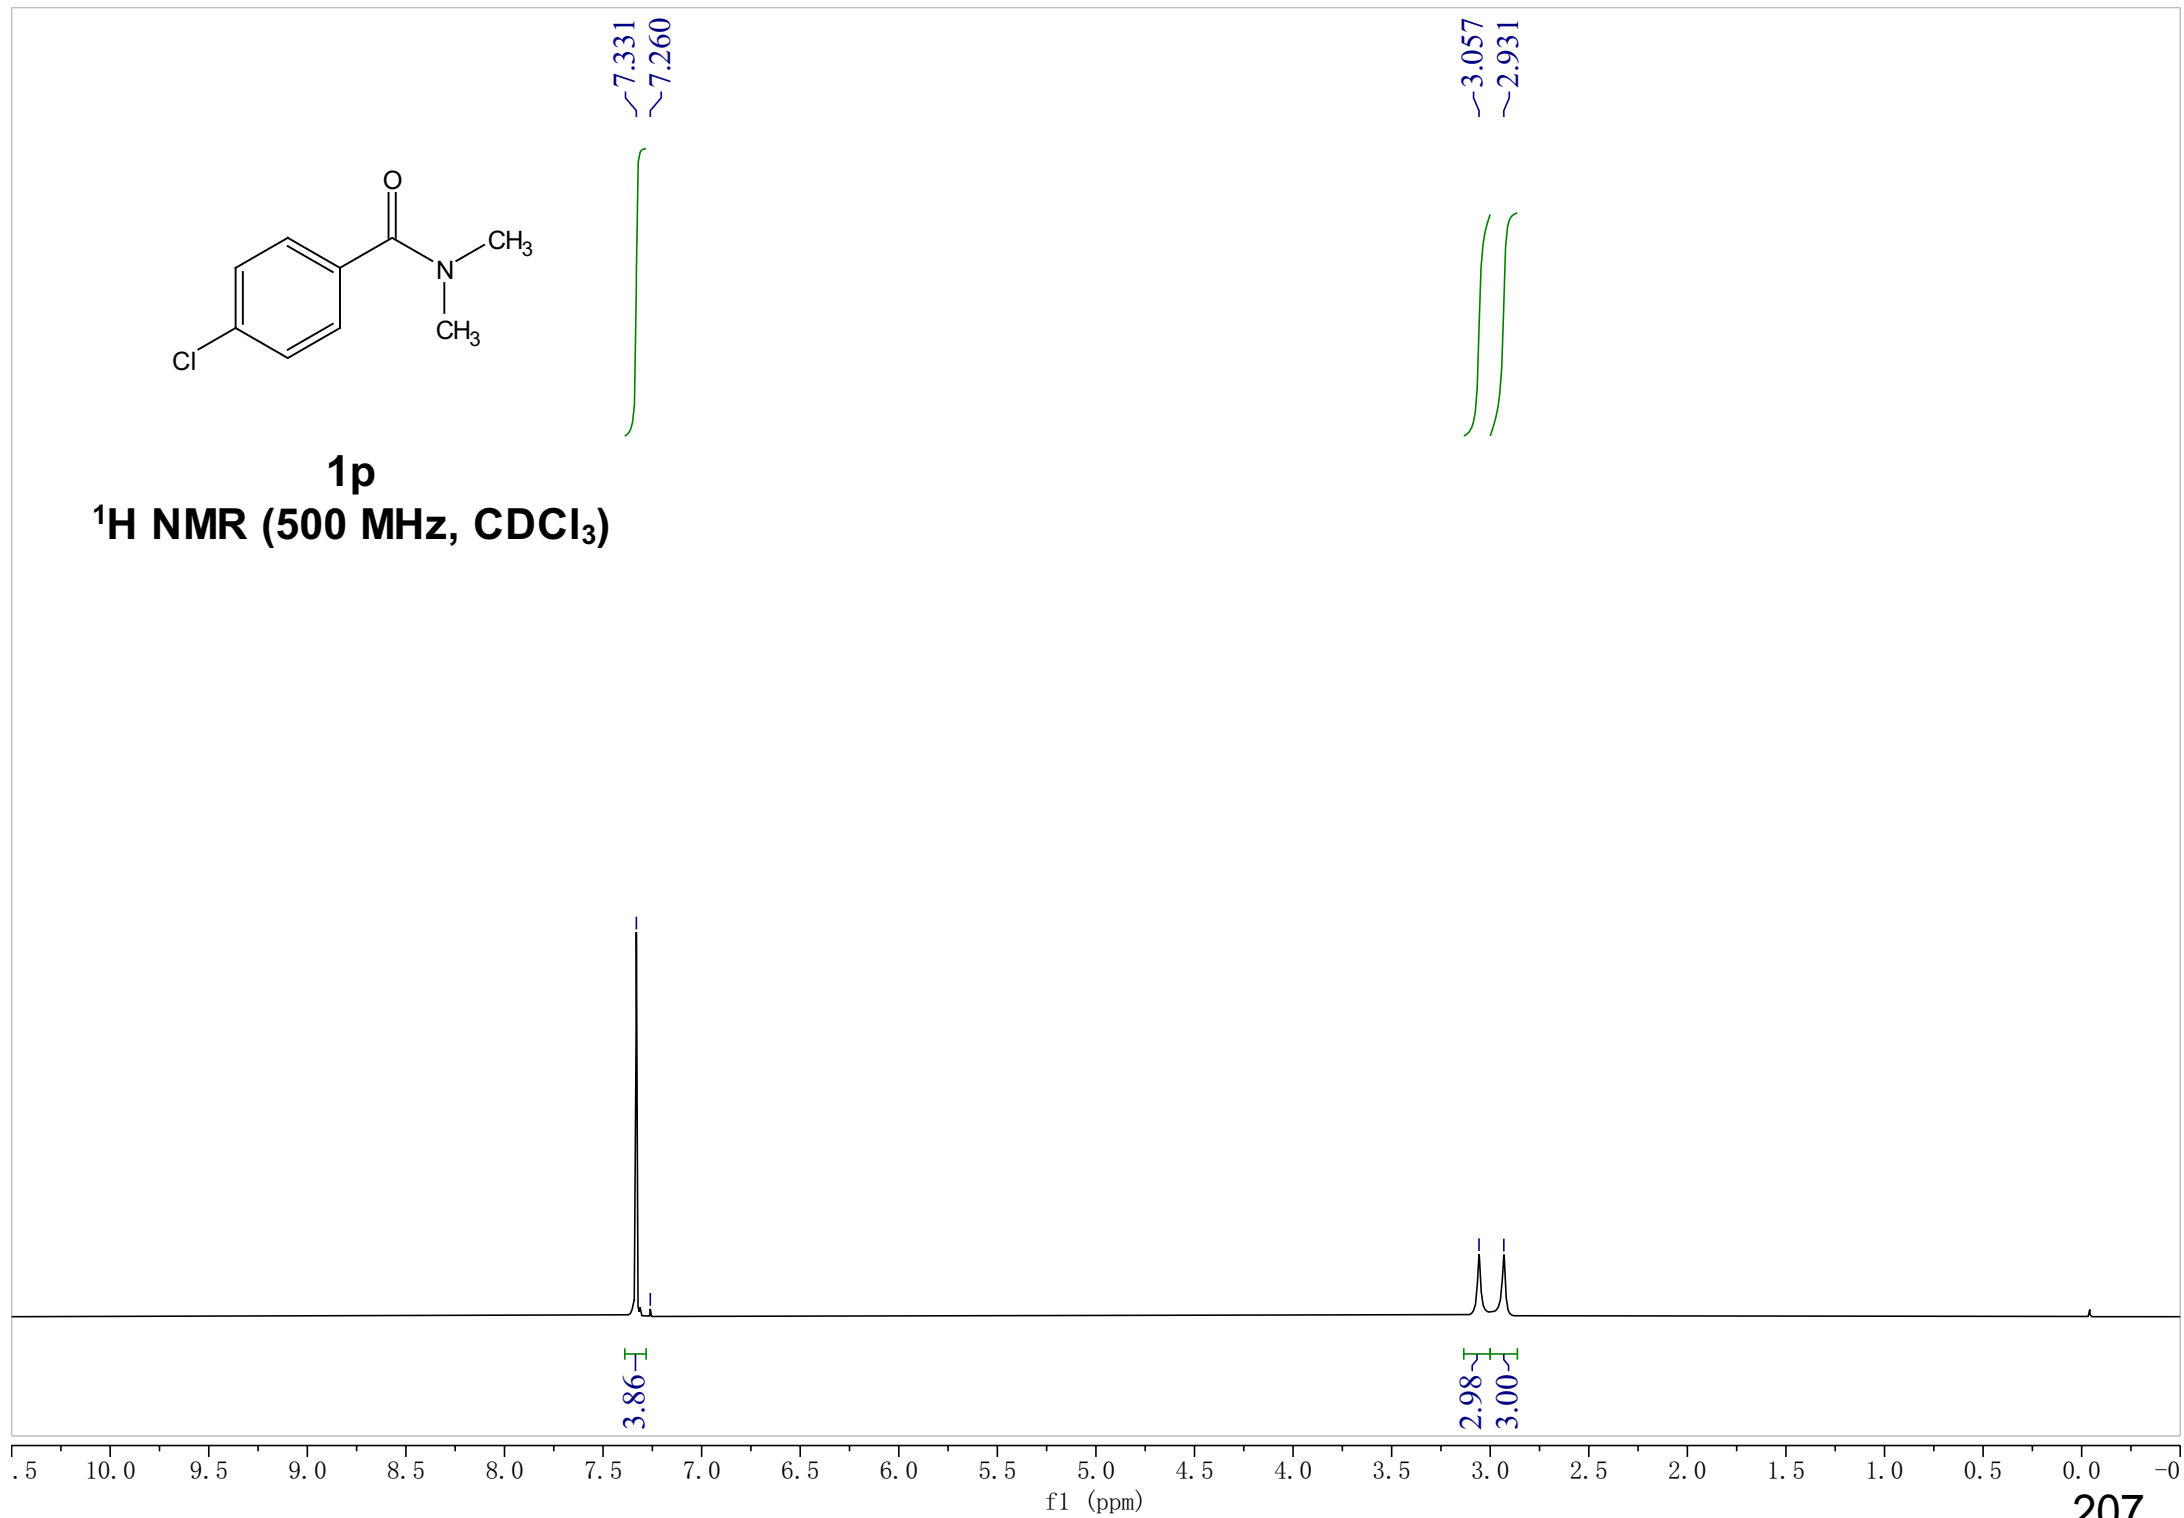



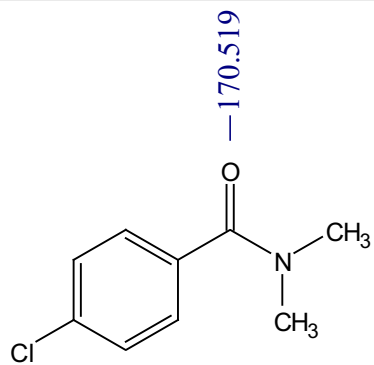

**1p**

**<sup>13</sup>C NMR (125 MHz, CDCl<sub>3</sub>)**

135.566  
134.689  
128.647  
128.630

77.415  
77.160  
76.906

39.570  
35.430

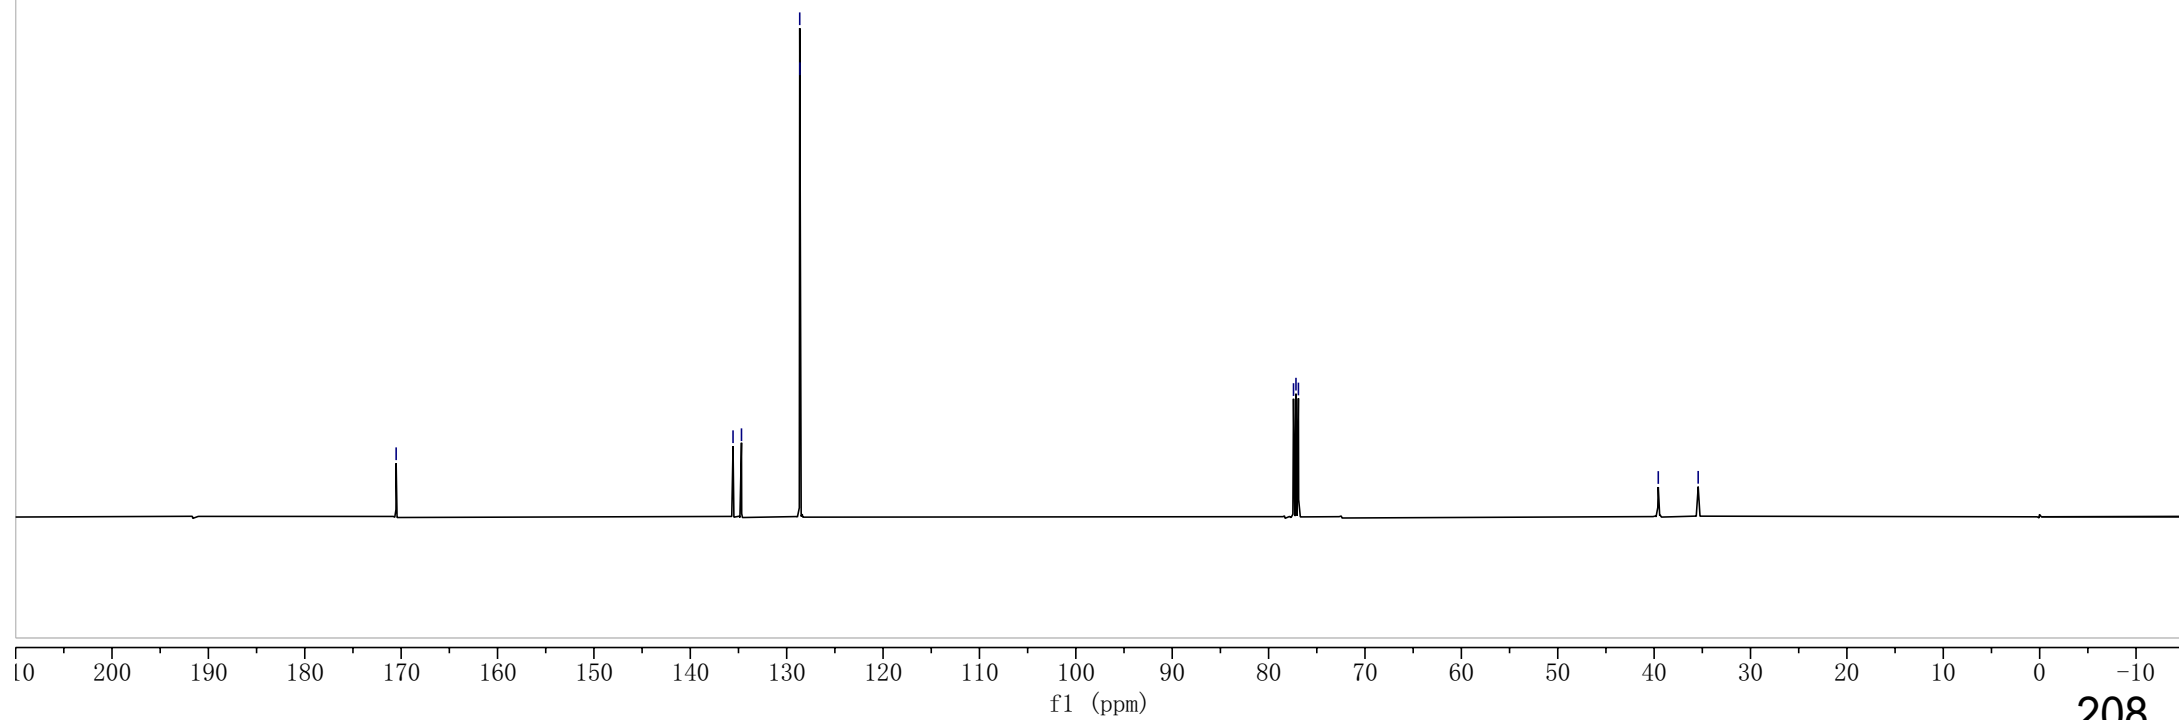

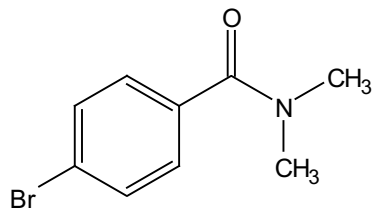

**1q**

**<sup>1</sup>H NMR (500 MHz, CDCl<sub>3</sub>)**

7.546  
7.529  
7.307  
7.291  
7.260

3.099  
2.971

1.96  
1.90

2.99  
3.00

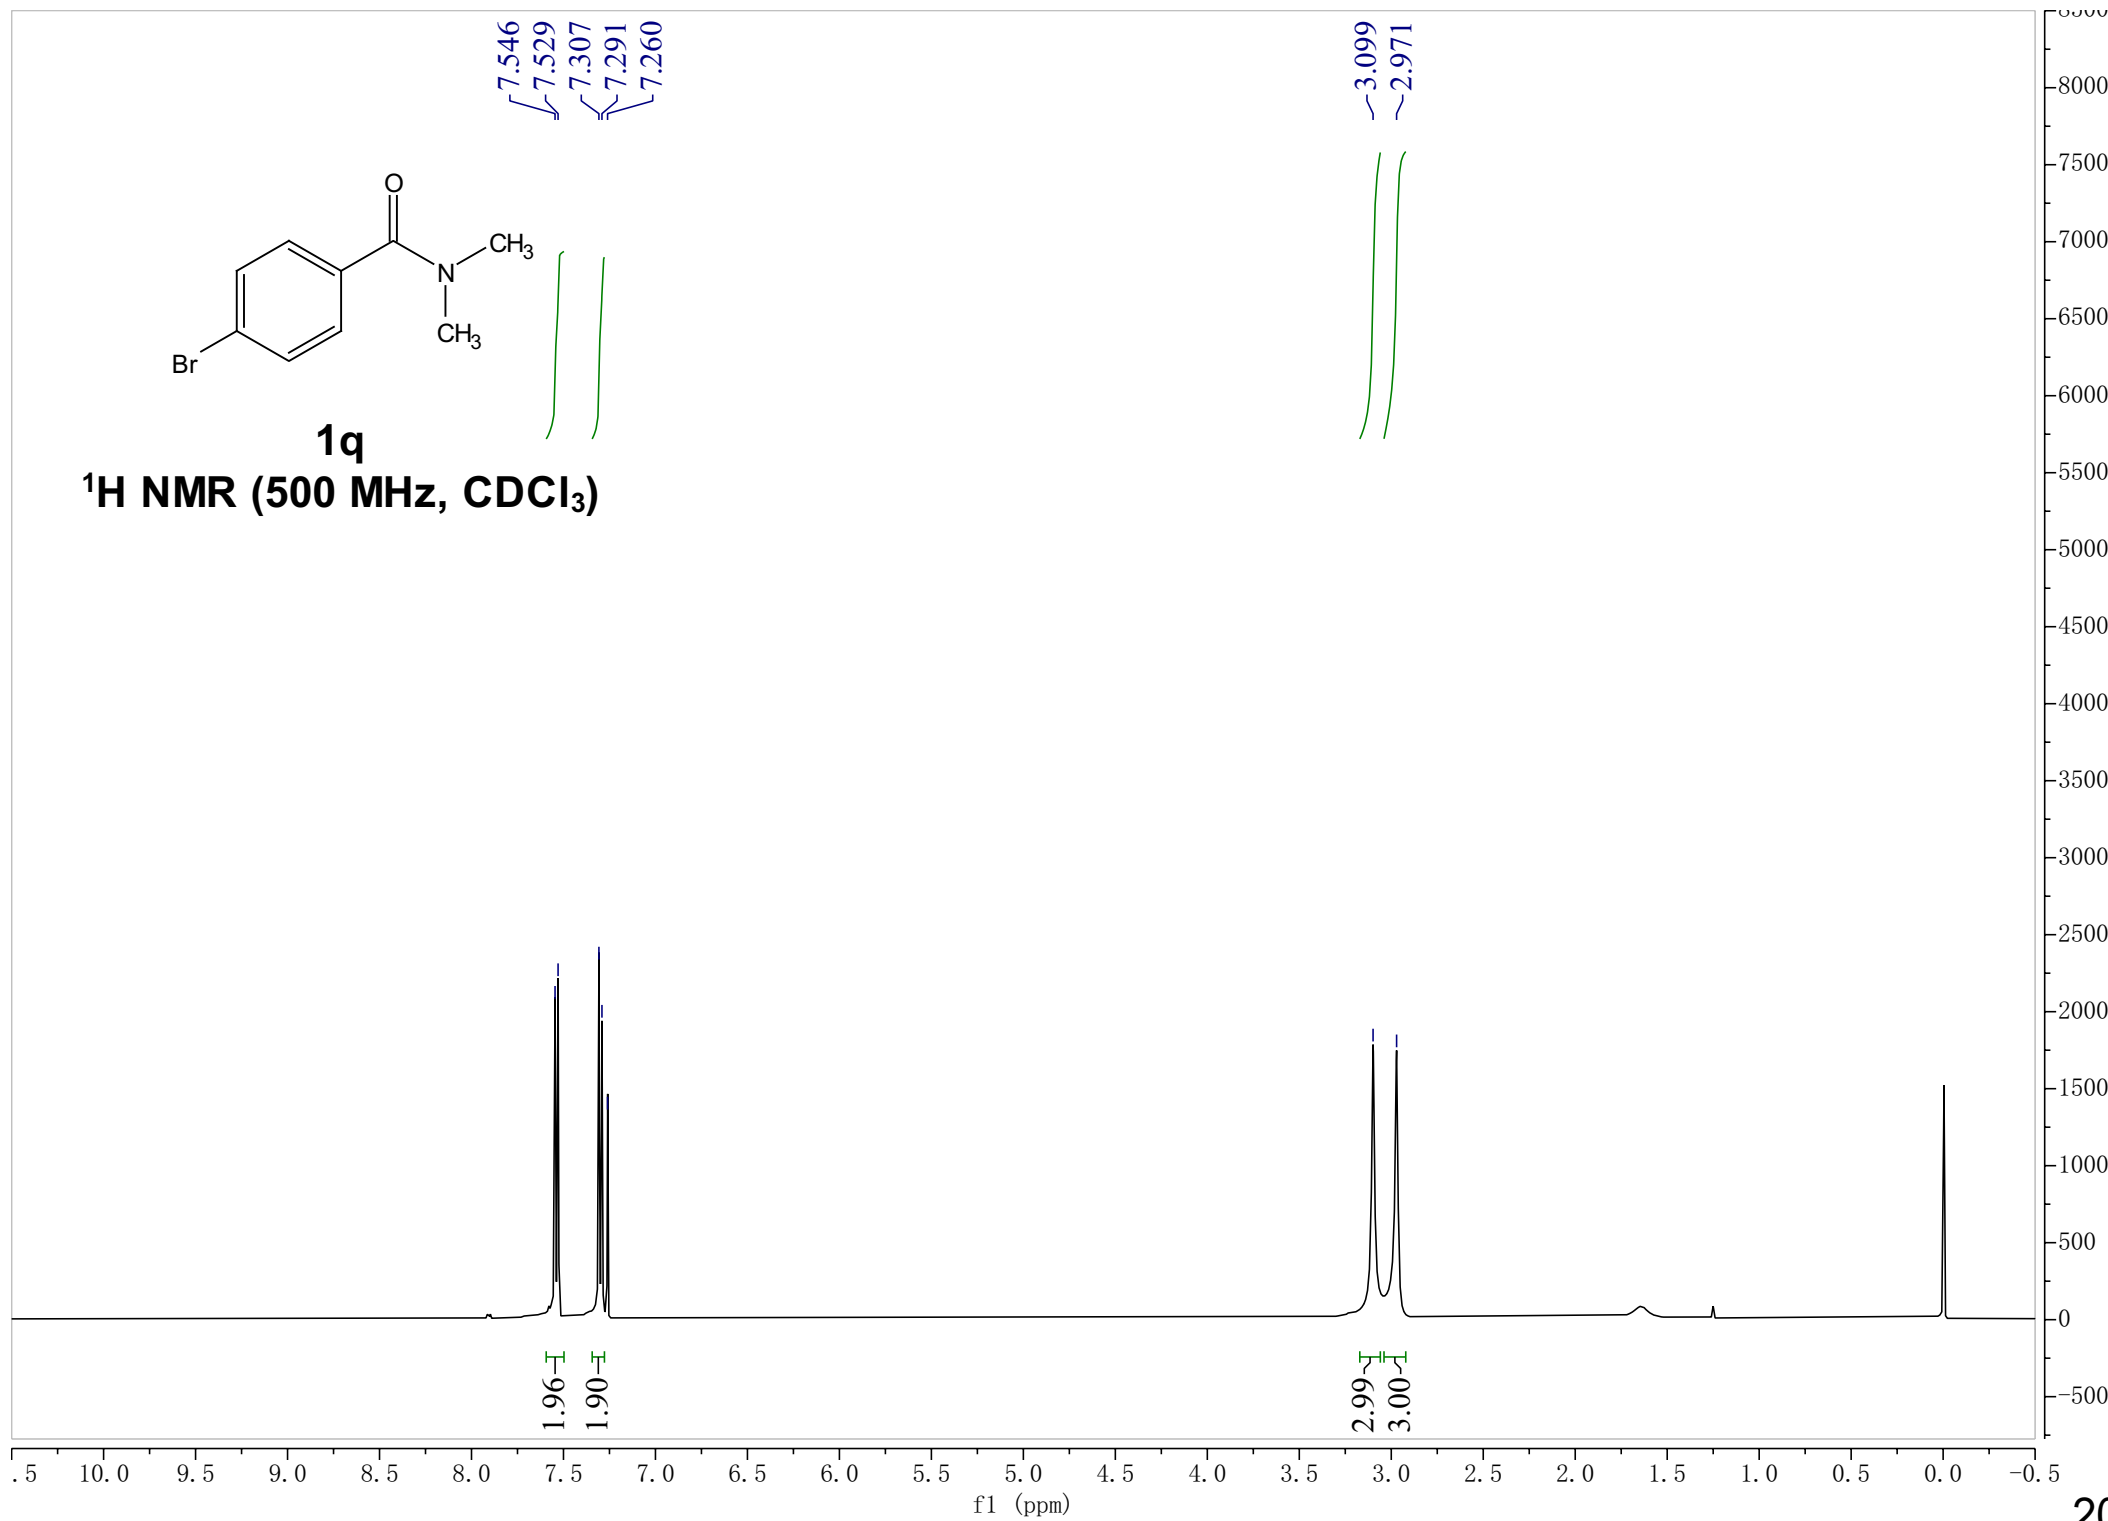

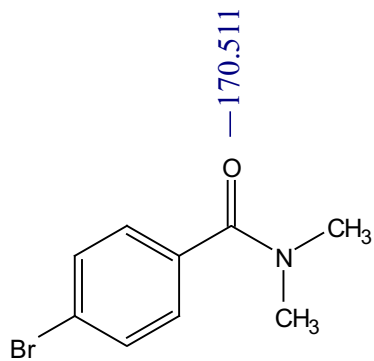

**1q**

**<sup>13</sup>C NMR (125 MHz, CDCl<sub>3</sub>)**

— 135.141  
— 131.567  
~ 128.831  
— 123.793

— 77.415  
— 77.160  
— 76.906

— 39.537  
— 35.404

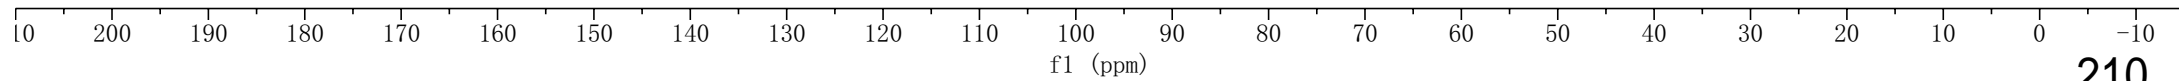

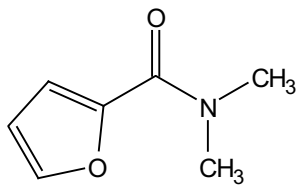

**1r**

**<sup>1</sup>H NMR (500 MHz, CDCl<sub>3</sub>)**

7.427  
7.423  
7.418  
6.908  
6.902  
6.401  
6.397  
6.394  
6.390

3.198  
3.020

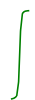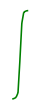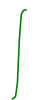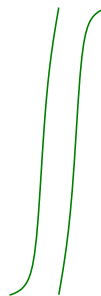

0.92

0.92

0.93

3.00

2.98

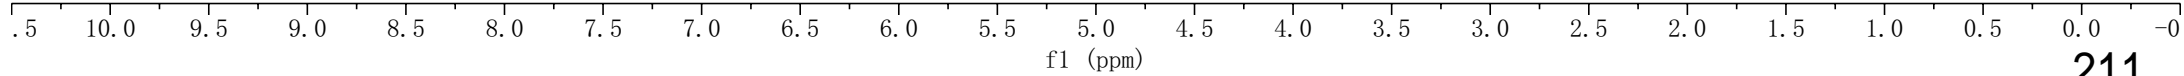

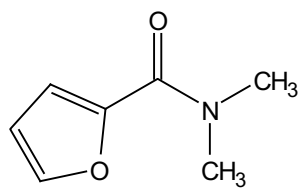

**1r**

**<sup>13</sup>C NMR (125 MHz, CDCl<sub>3</sub>)**

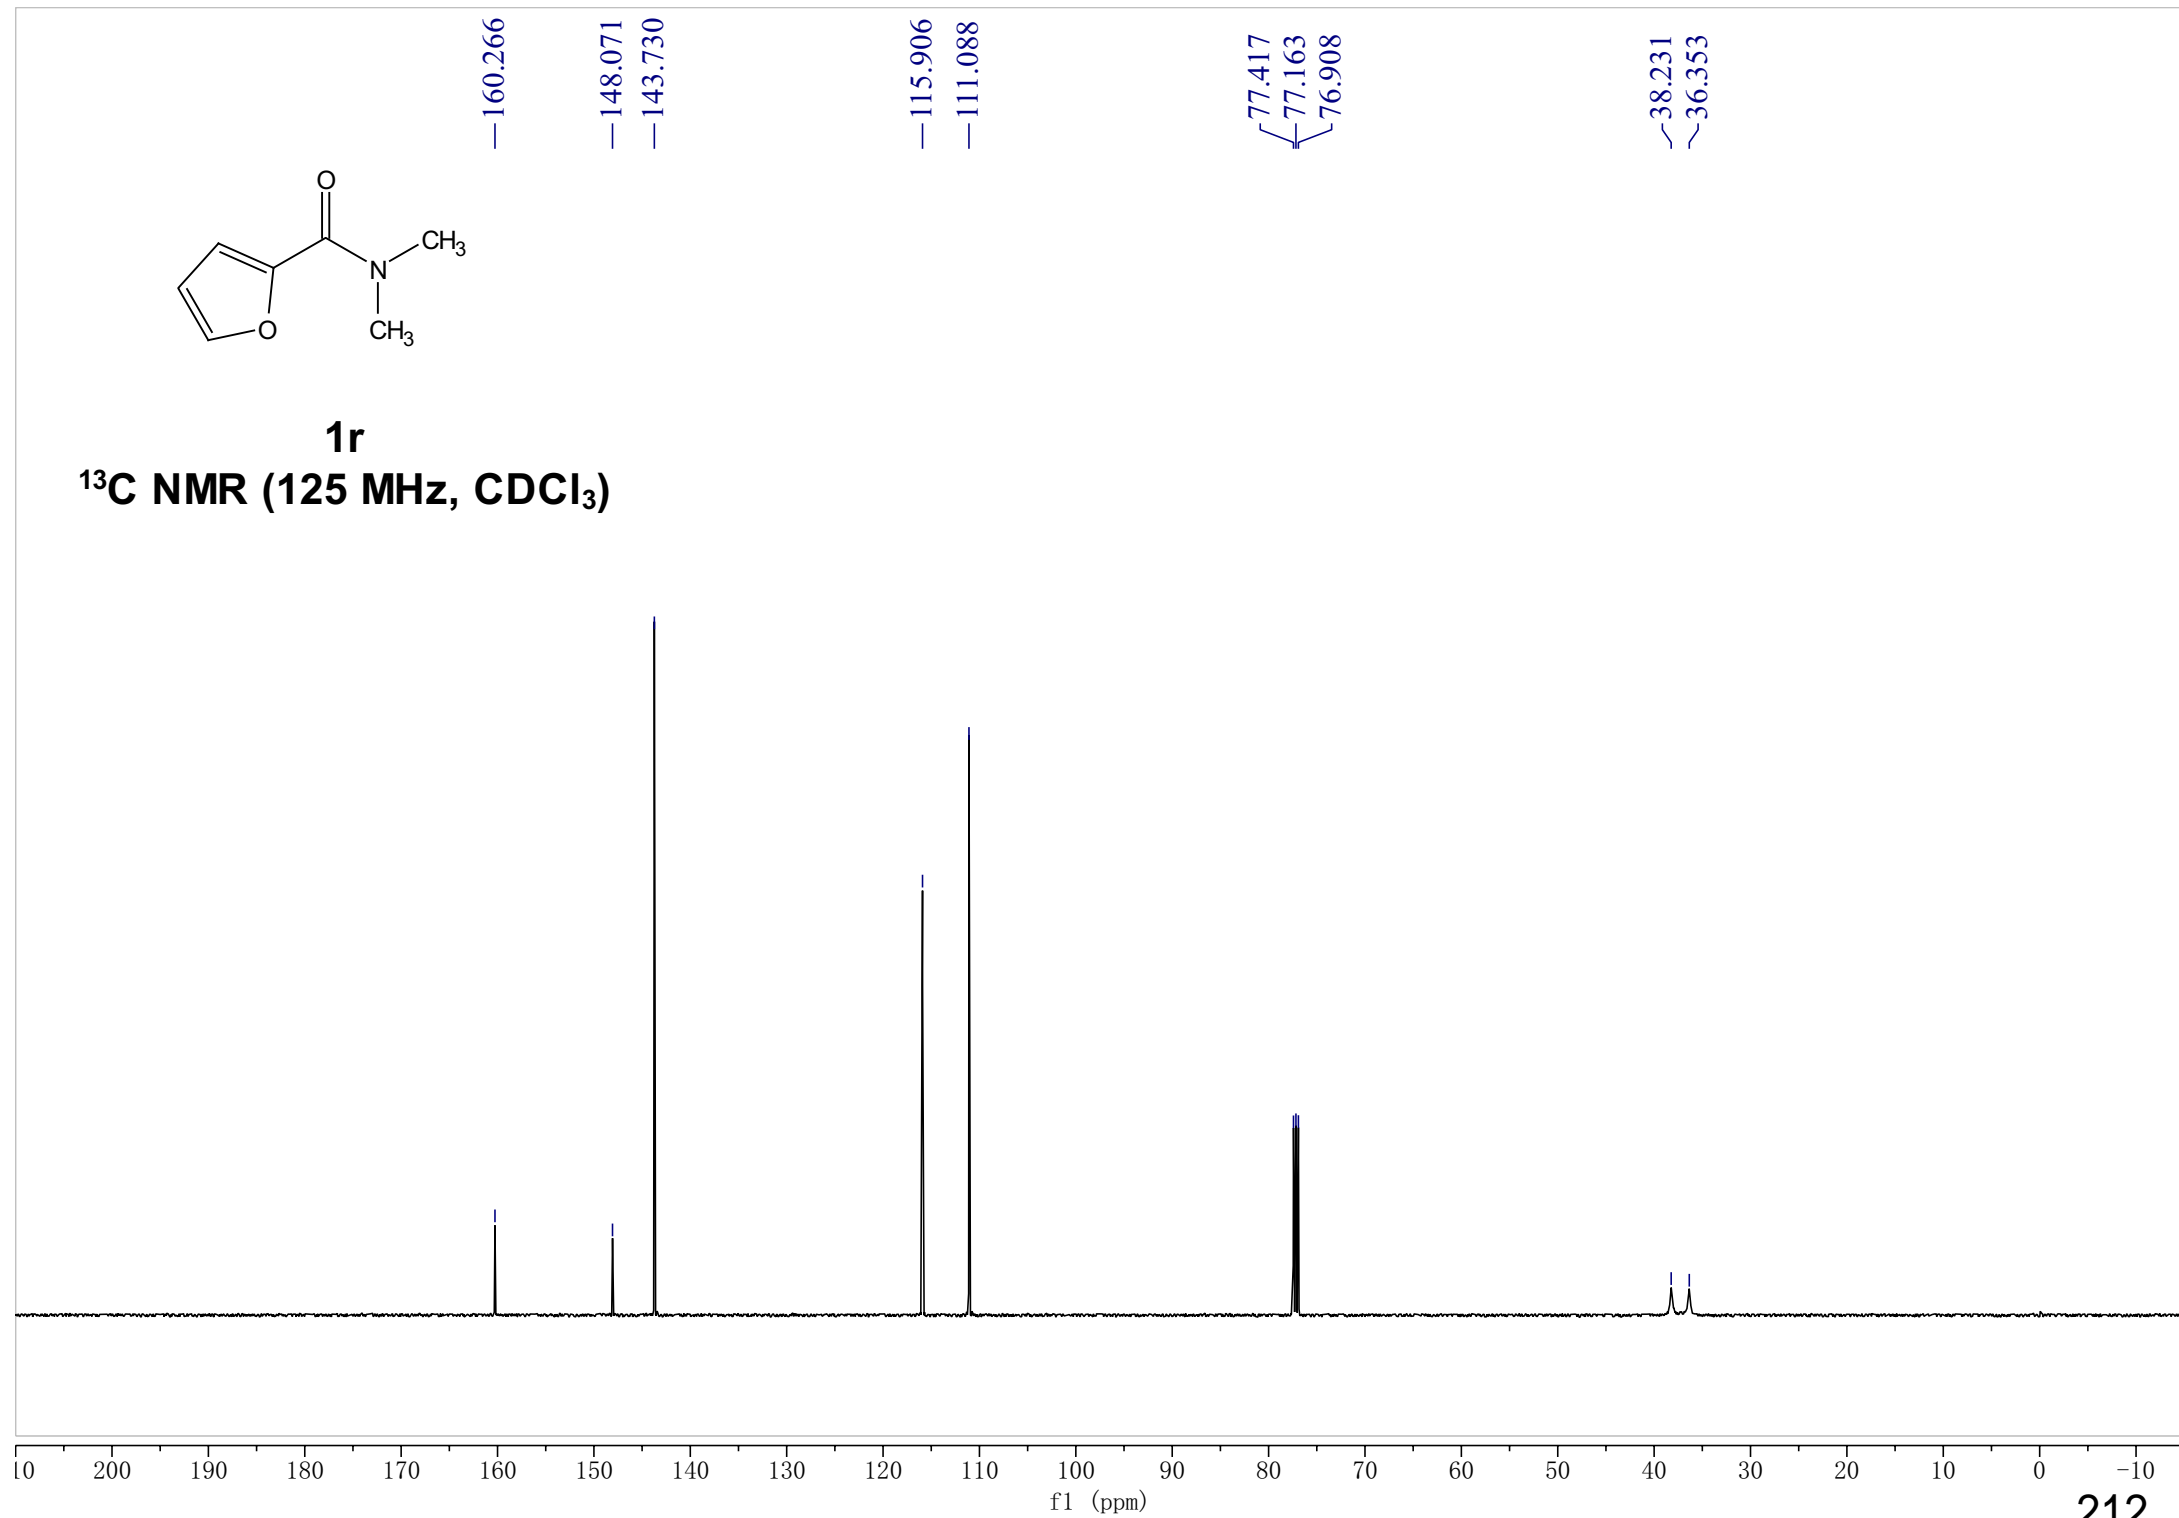

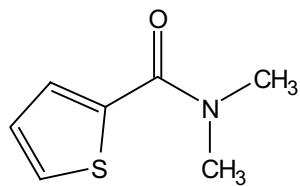

**1s**

**<sup>1</sup>H NMR (500 MHz, CDCl<sub>3</sub>)**

7.408  
7.406  
7.398  
7.396  
7.319  
7.317  
7.311  
7.309  
7.260  
7.011  
7.004  
7.001  
6.994

3.138

||| |

—

0.93  
0.94  
0.95

6.00

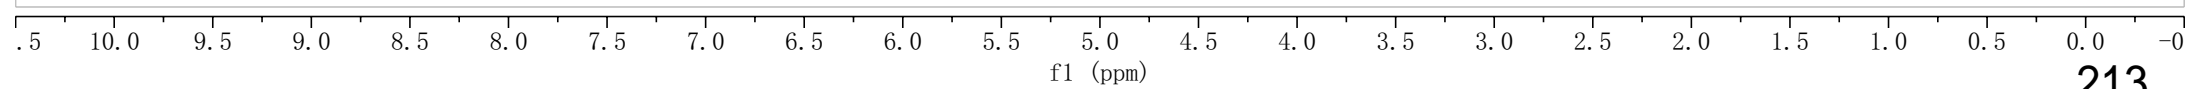

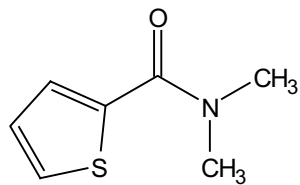

**1s**

**<sup>13</sup>C NMR (125 MHz, CDCl<sub>3</sub>)**

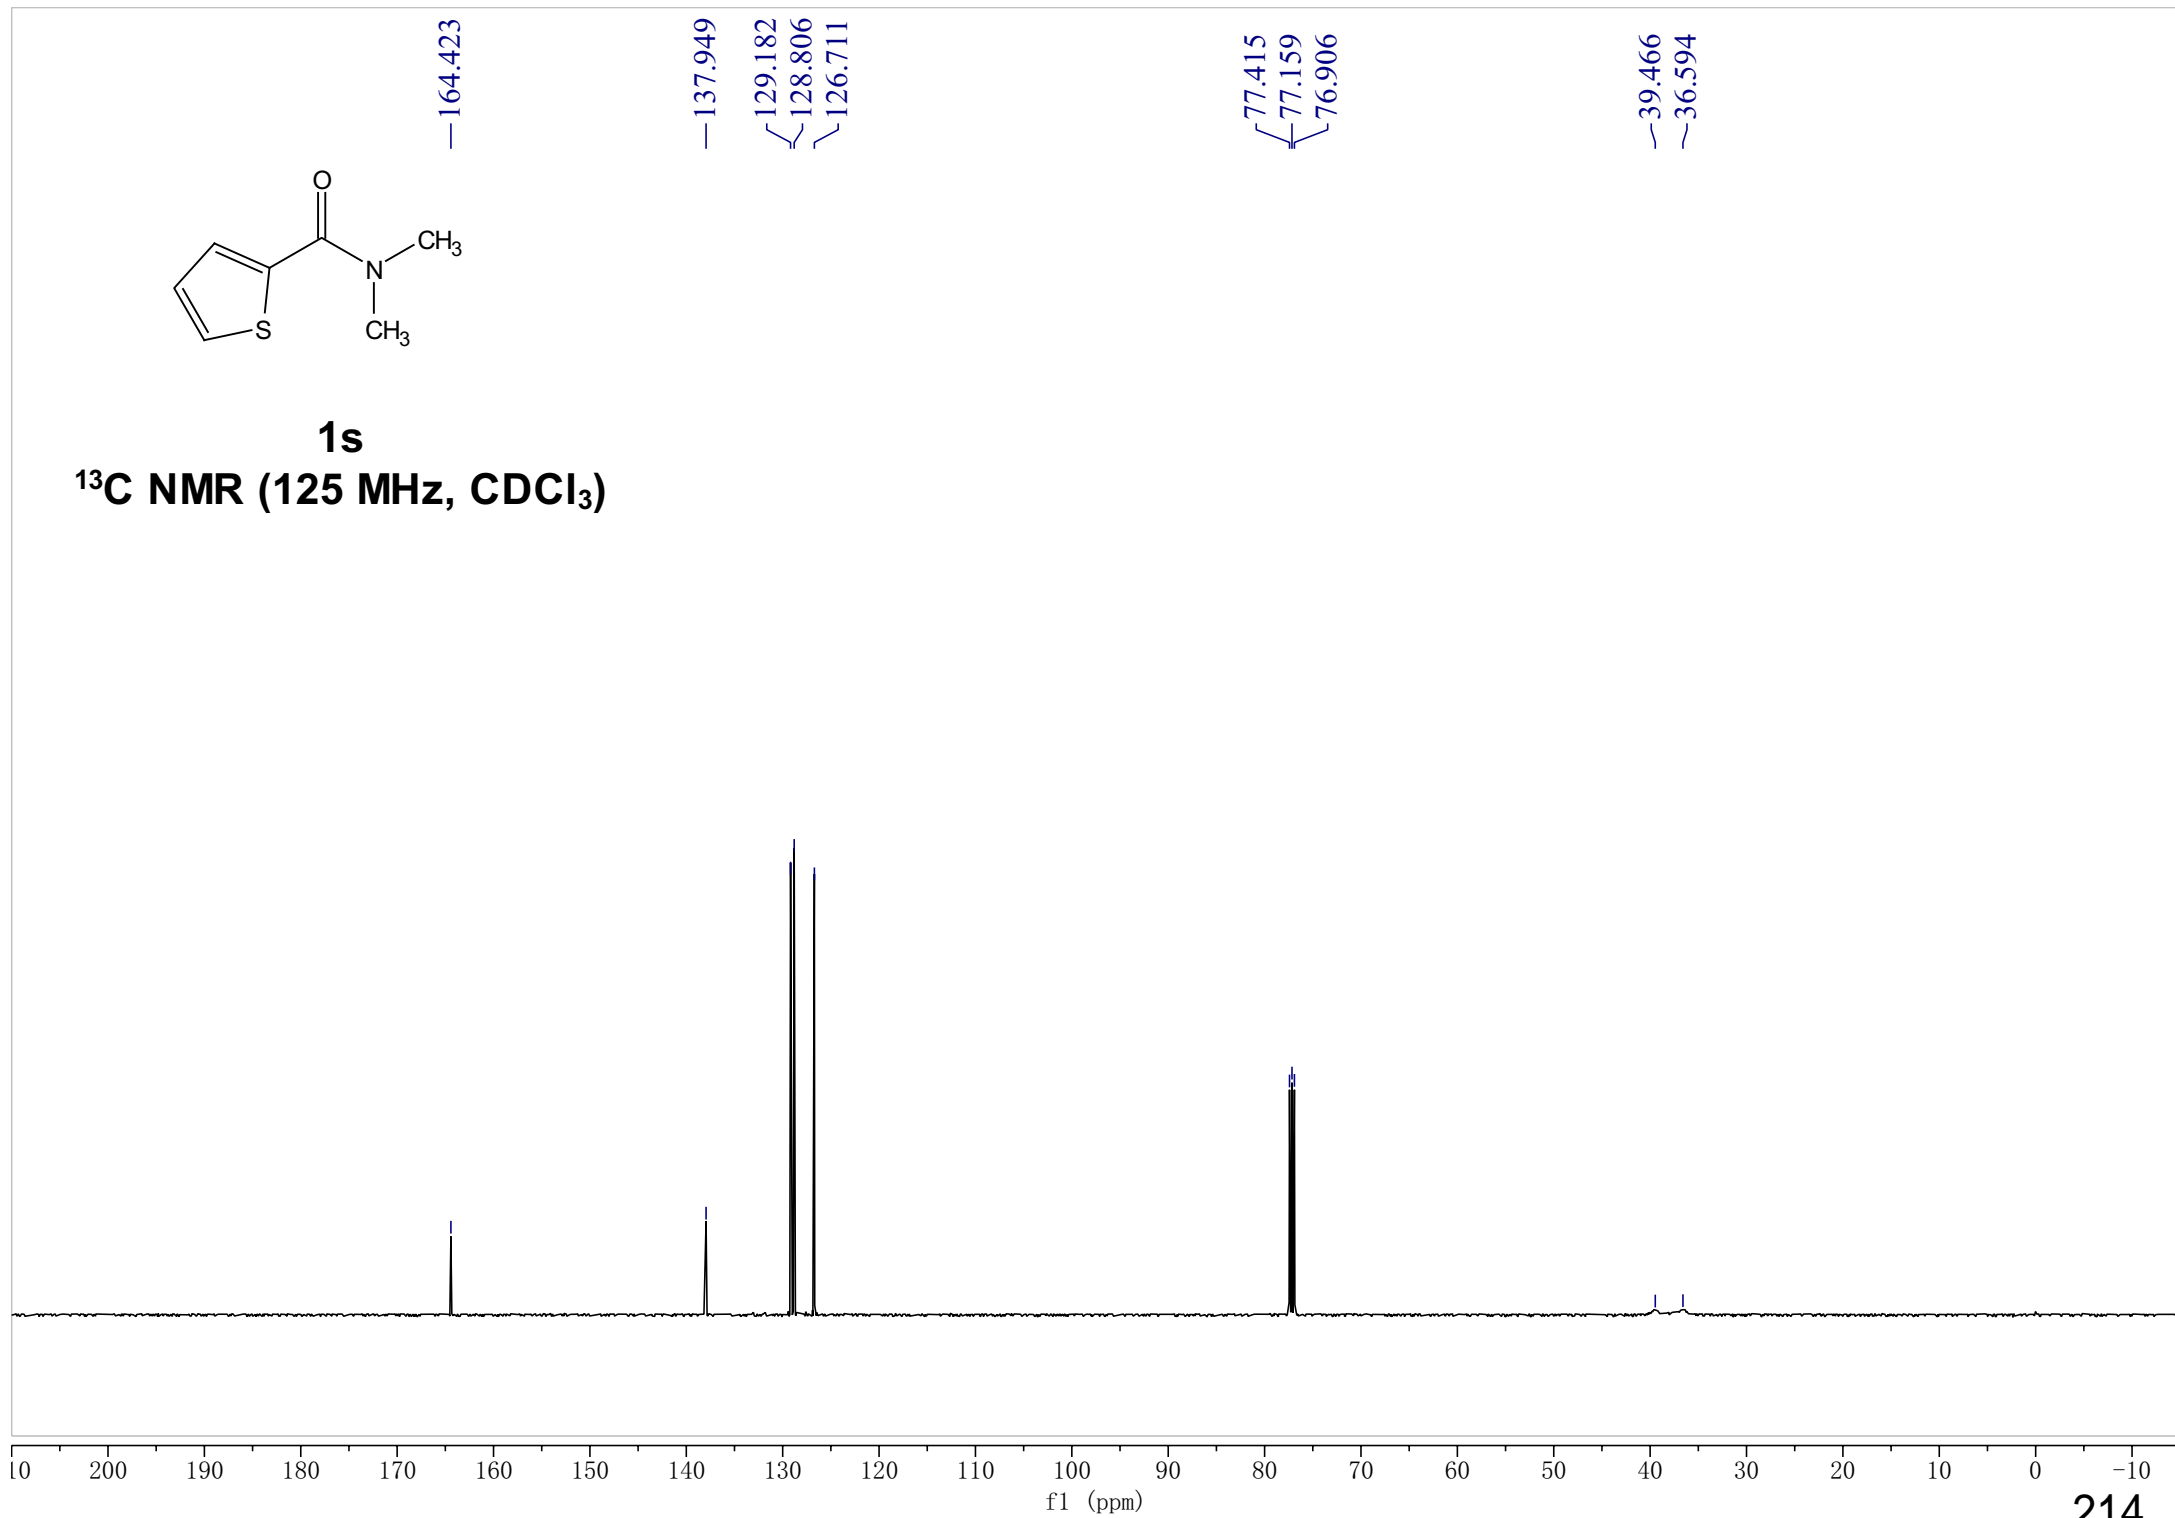

8.628  
8.624  
8.600  
8.596  
8.590  
8.586  
7.722  
7.718  
7.714  
7.706  
7.702  
7.698  
7.312  
7.303  
7.297  
7.287  
7.260

3.073  
2.957

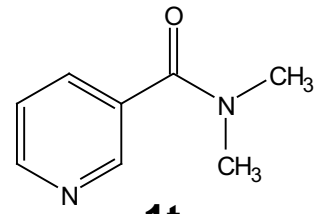

**1t**

**<sup>1</sup>H NMR (500 MHz, CDCl<sub>3</sub>)**

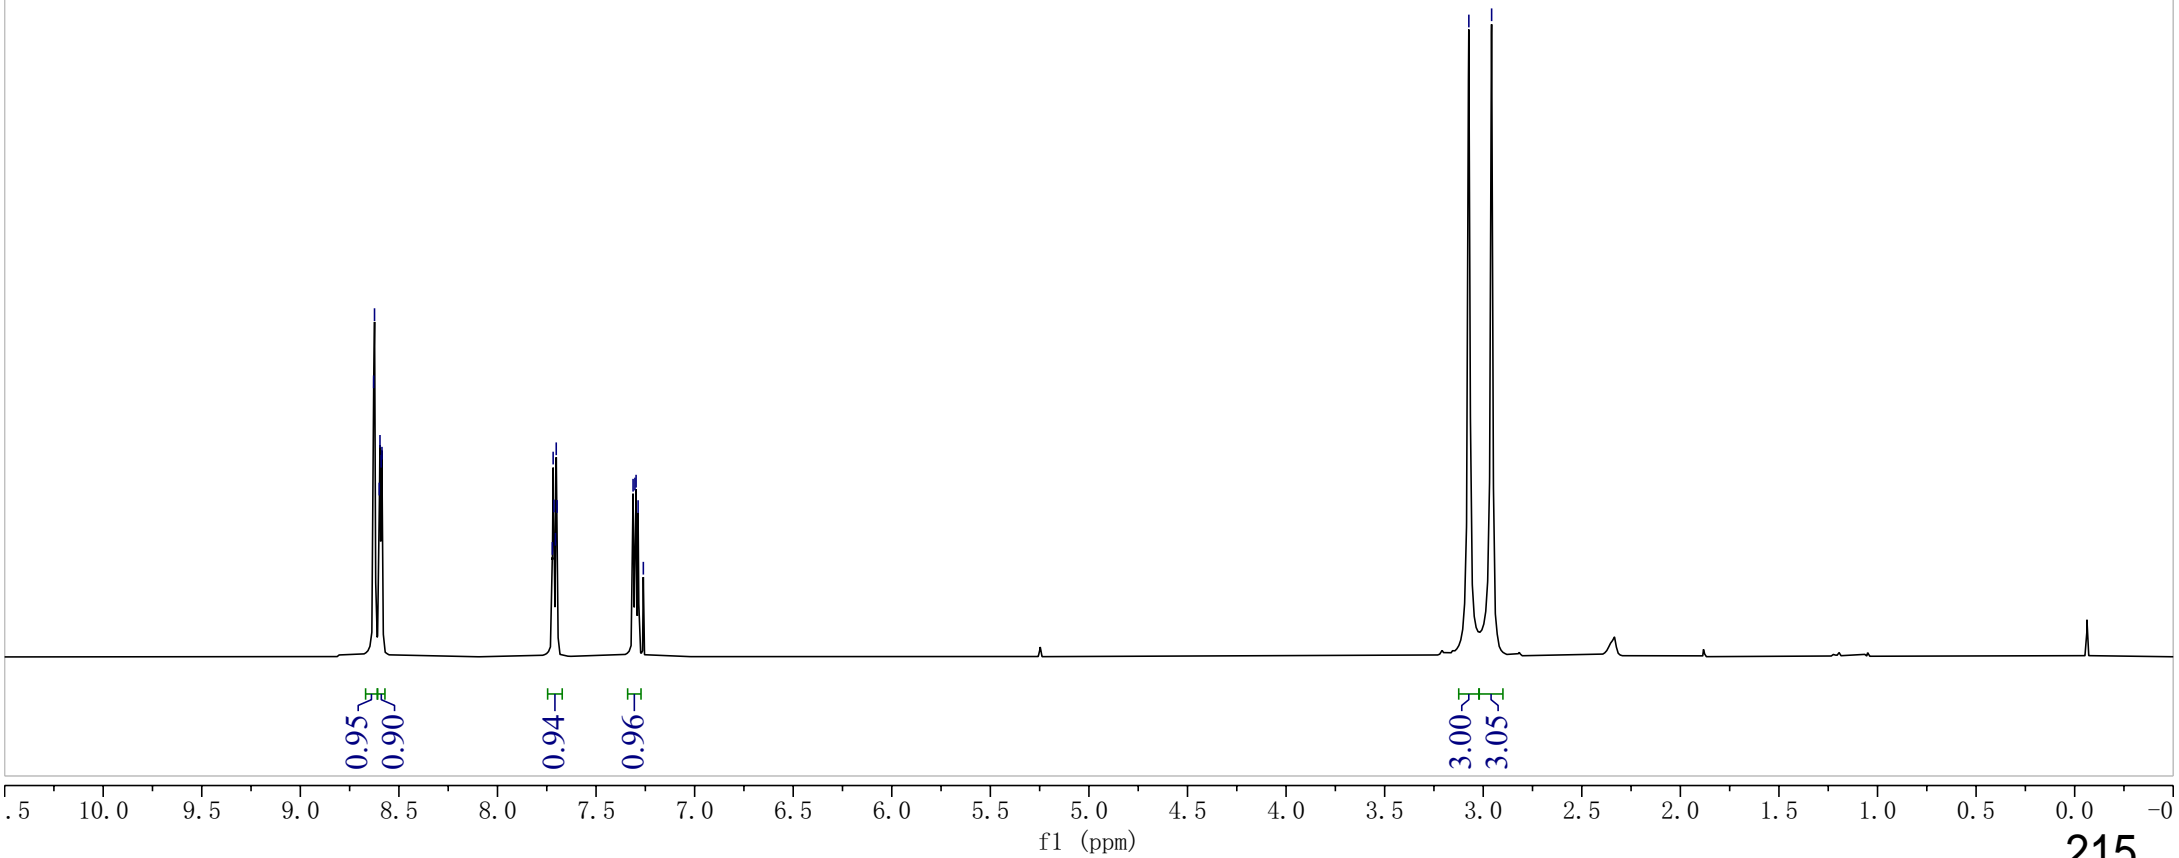



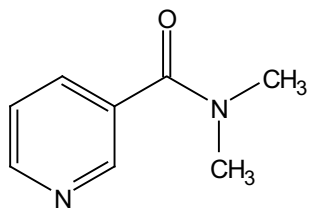

**1t**

**<sup>13</sup>C NMR (125 MHz, CDCl<sub>3</sub>)**

— 168.972

— 150.620

— 148.028

— 134.951

— 132.135

— 123.367

— 77.415

— 77.160

— 76.906

— 39.544

— 35.437

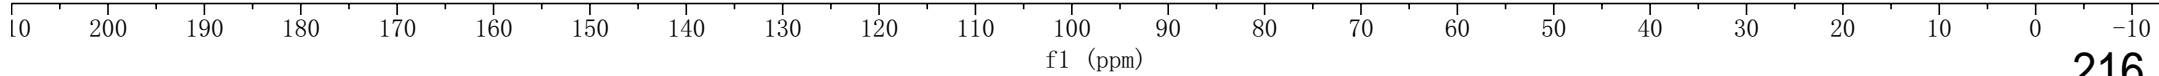

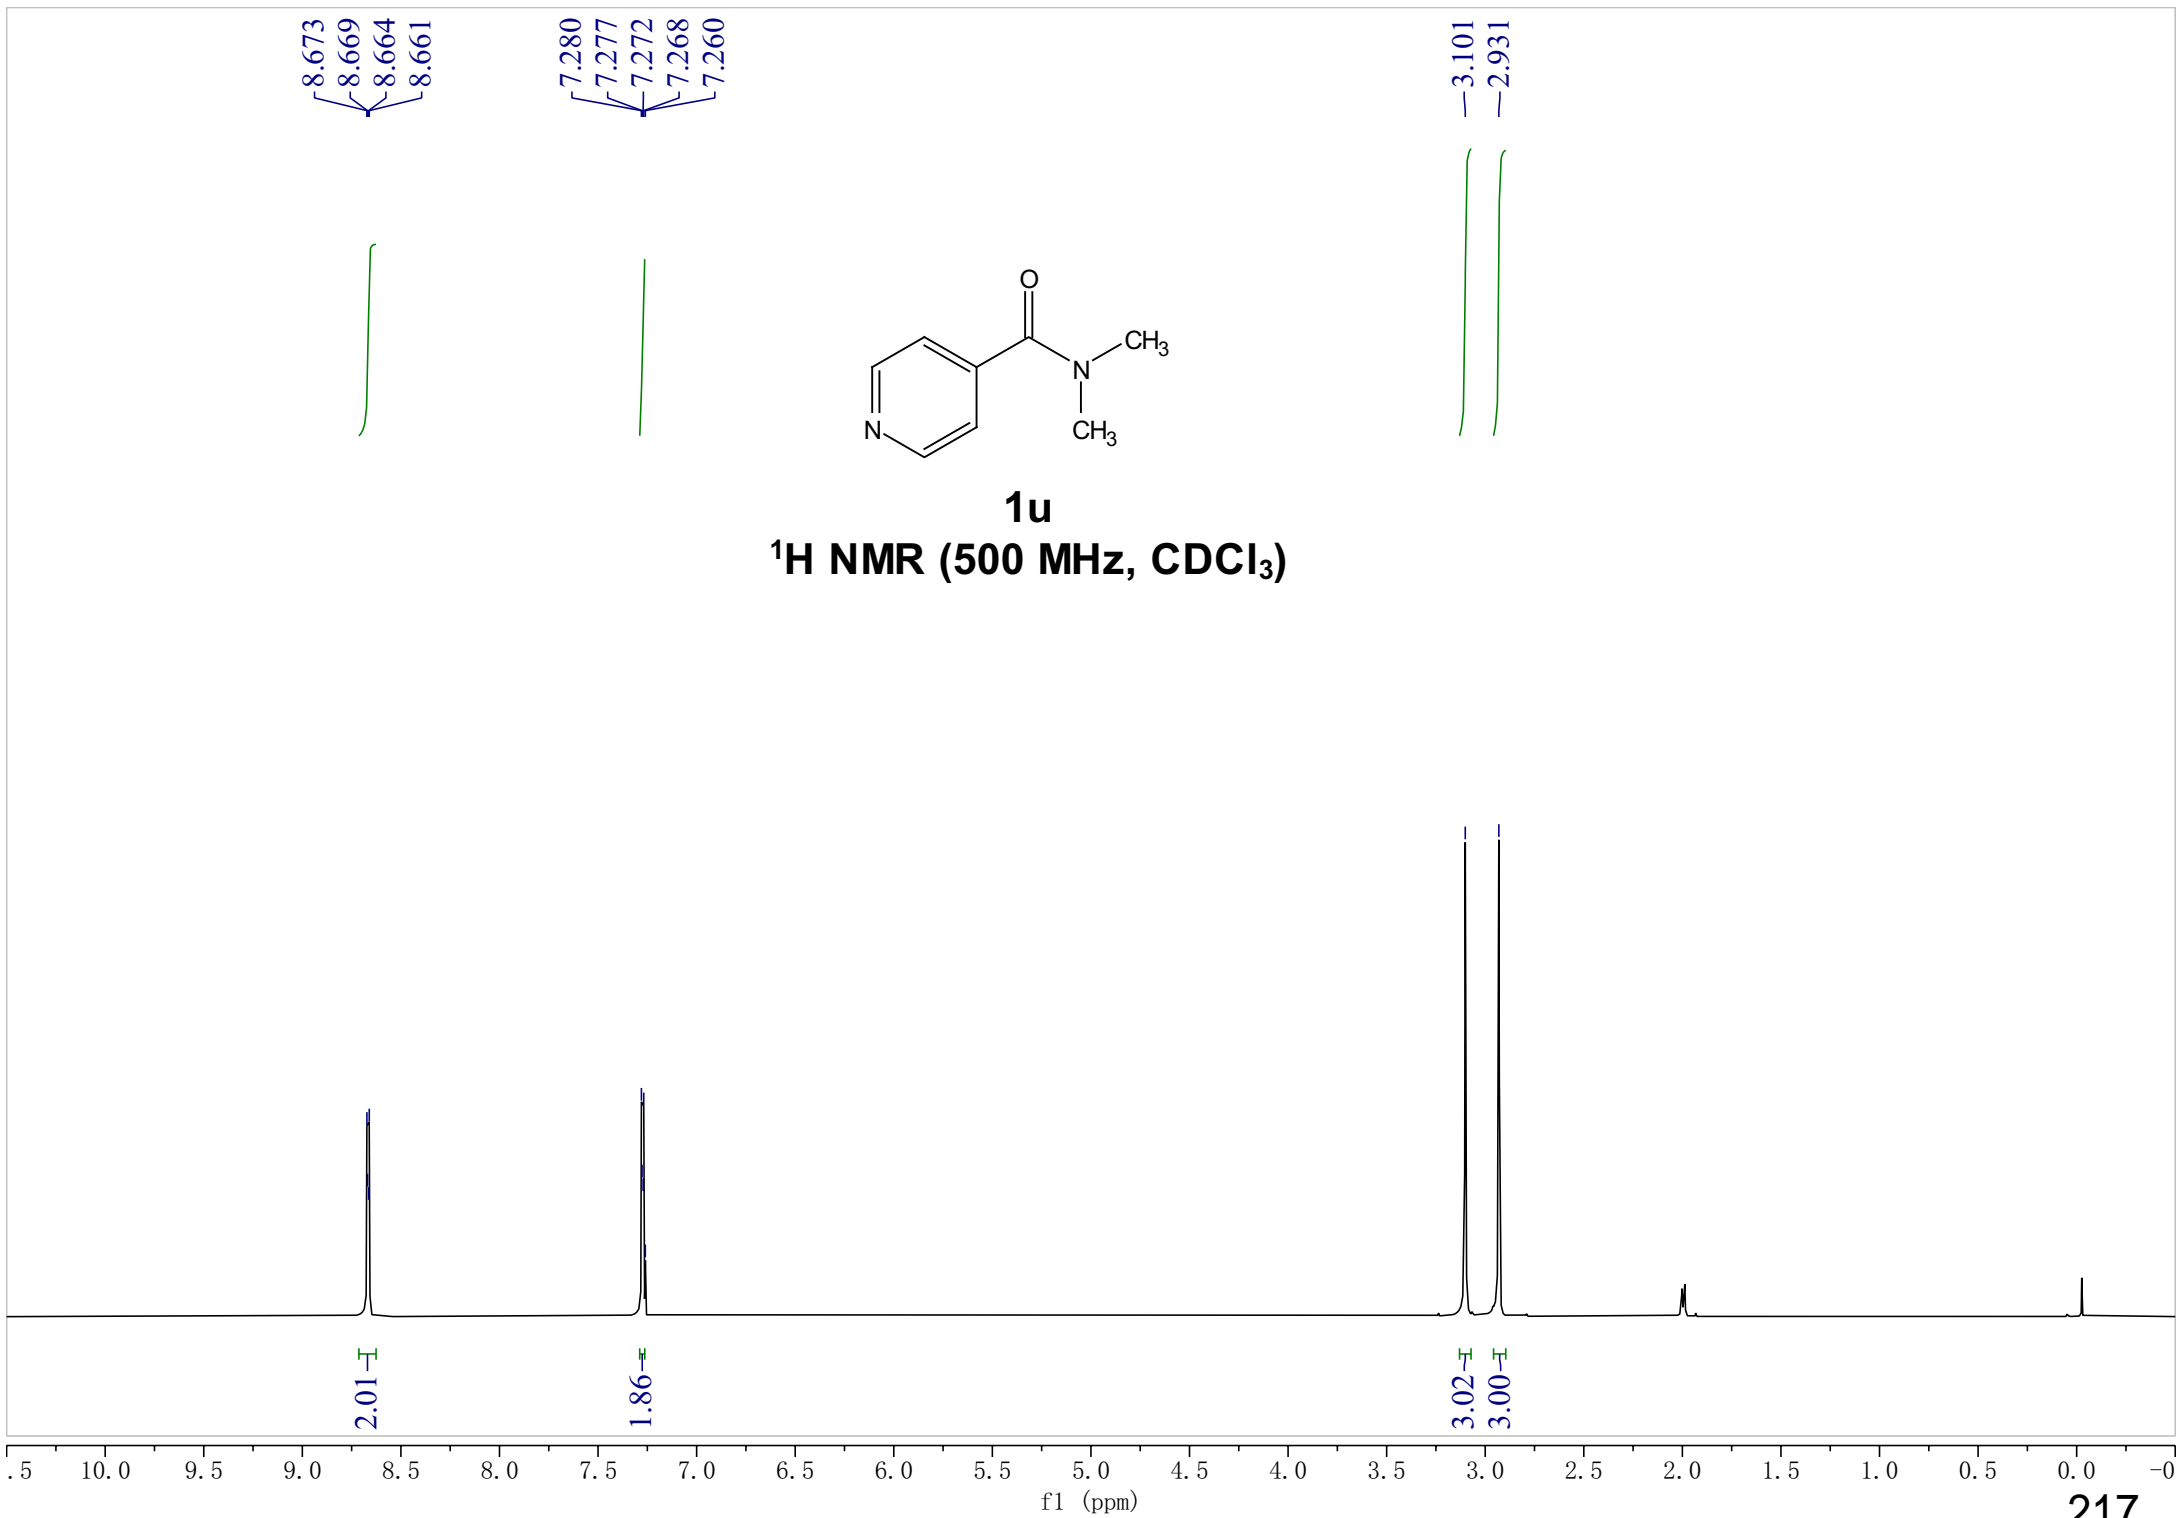

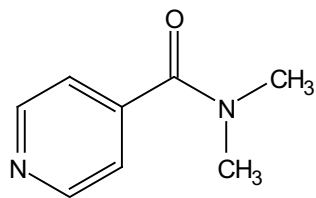

**1u**

**$^{13}\text{C}$  NMR (125 MHz,  $\text{CDCl}_3$ )**

—169.097

—150.319

—144.029

—121.325

77.414

77.161

76.905

—39.259

—35.271

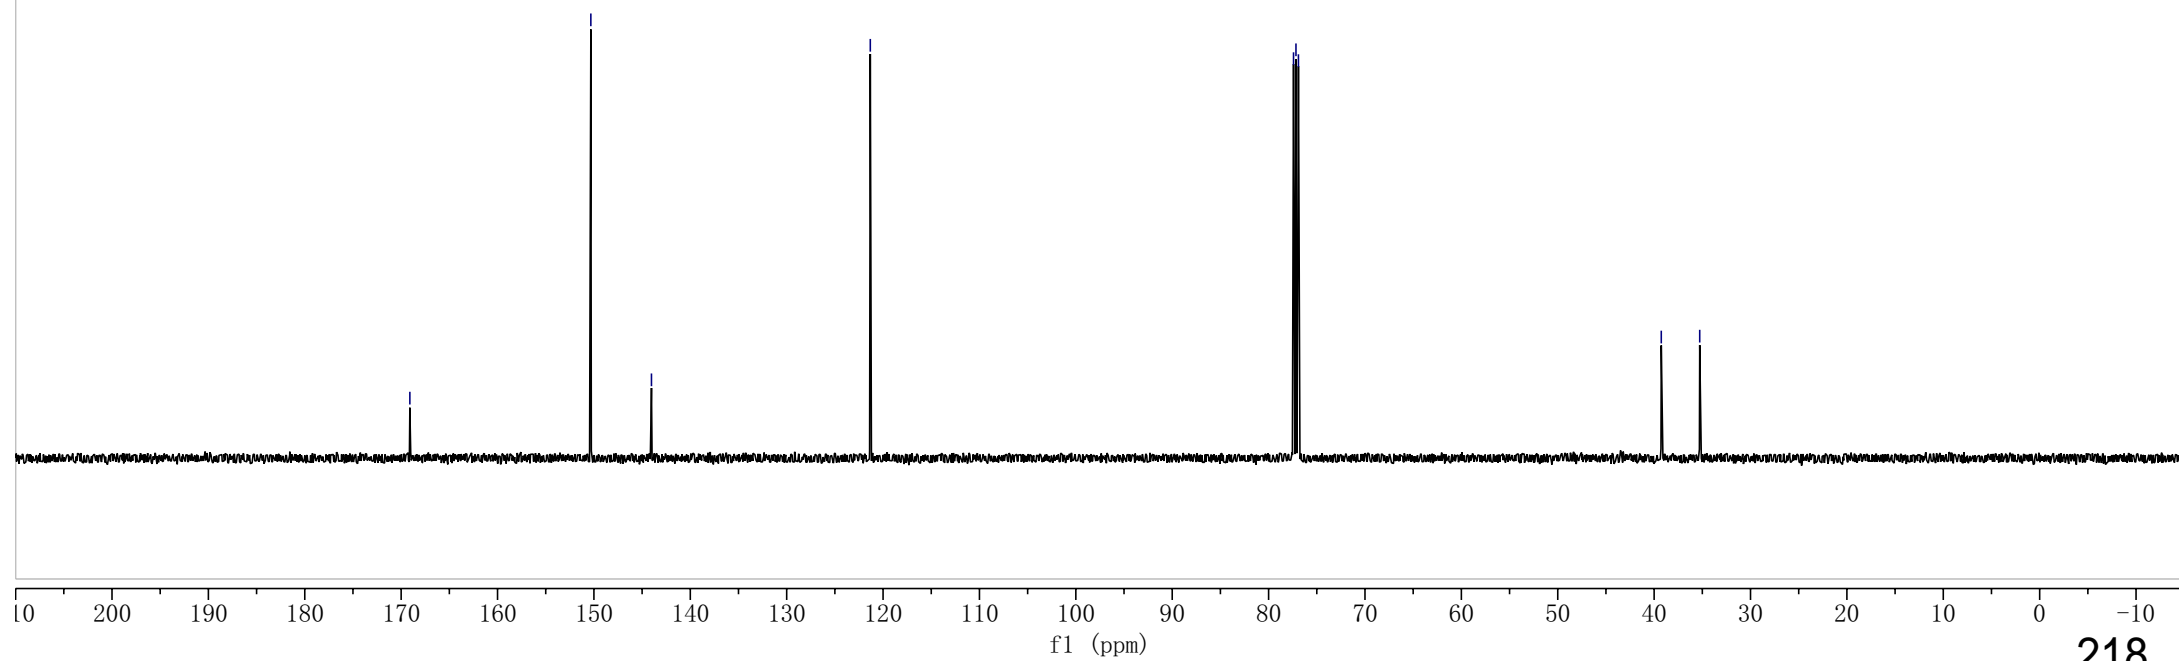

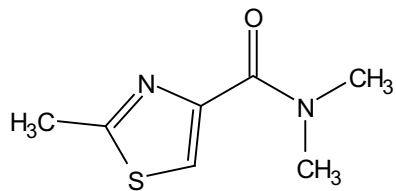

**1v**

**<sup>1</sup>H NMR (500 MHz, CDCl<sub>3</sub>)**

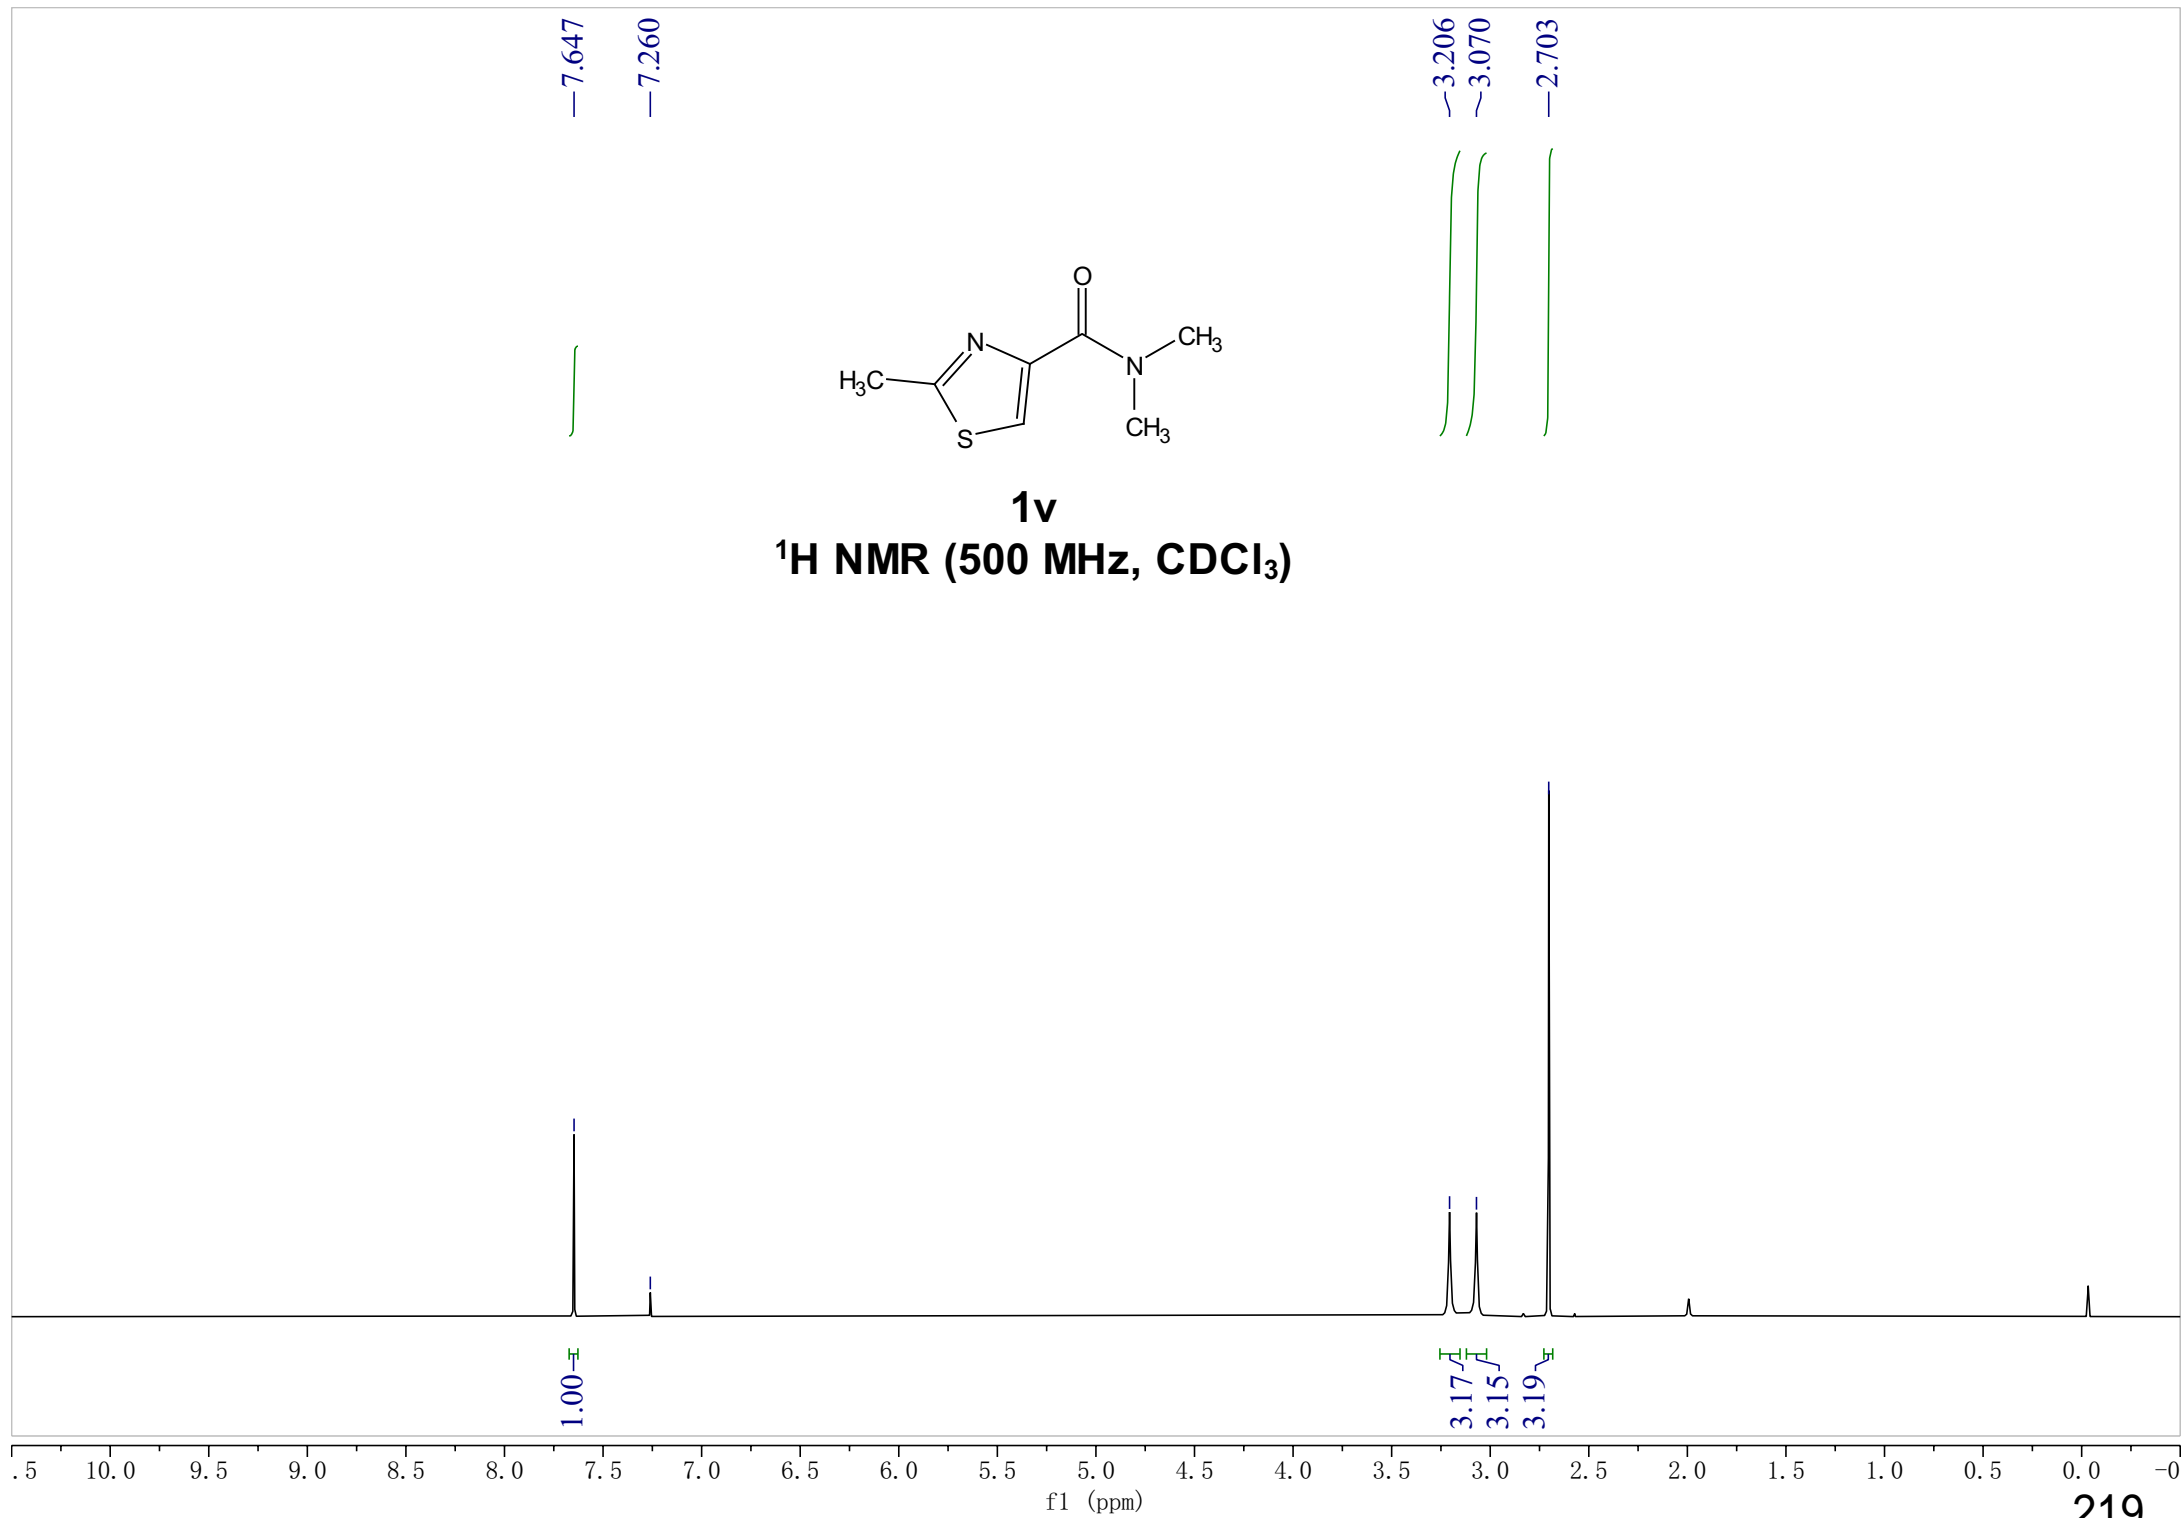

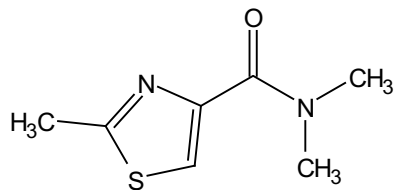

**1v**

**<sup>13</sup>C NMR (125 MHz, CDCl<sub>3</sub>)**

165.118  
164.478

150.505

123.028

77.414  
77.160  
76.905

39.052  
36.079

19.208

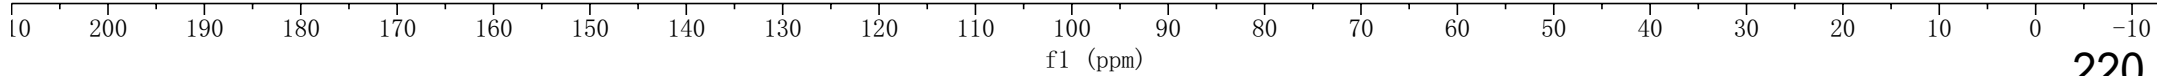

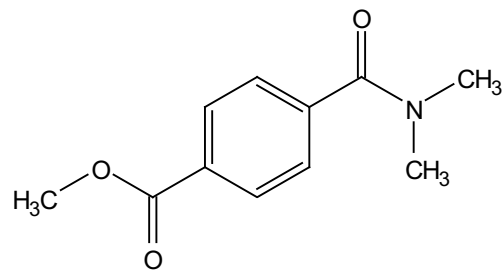

**1w**  
**<sup>1</sup>H NMR (500 MHz, CDCl<sub>3</sub>)**

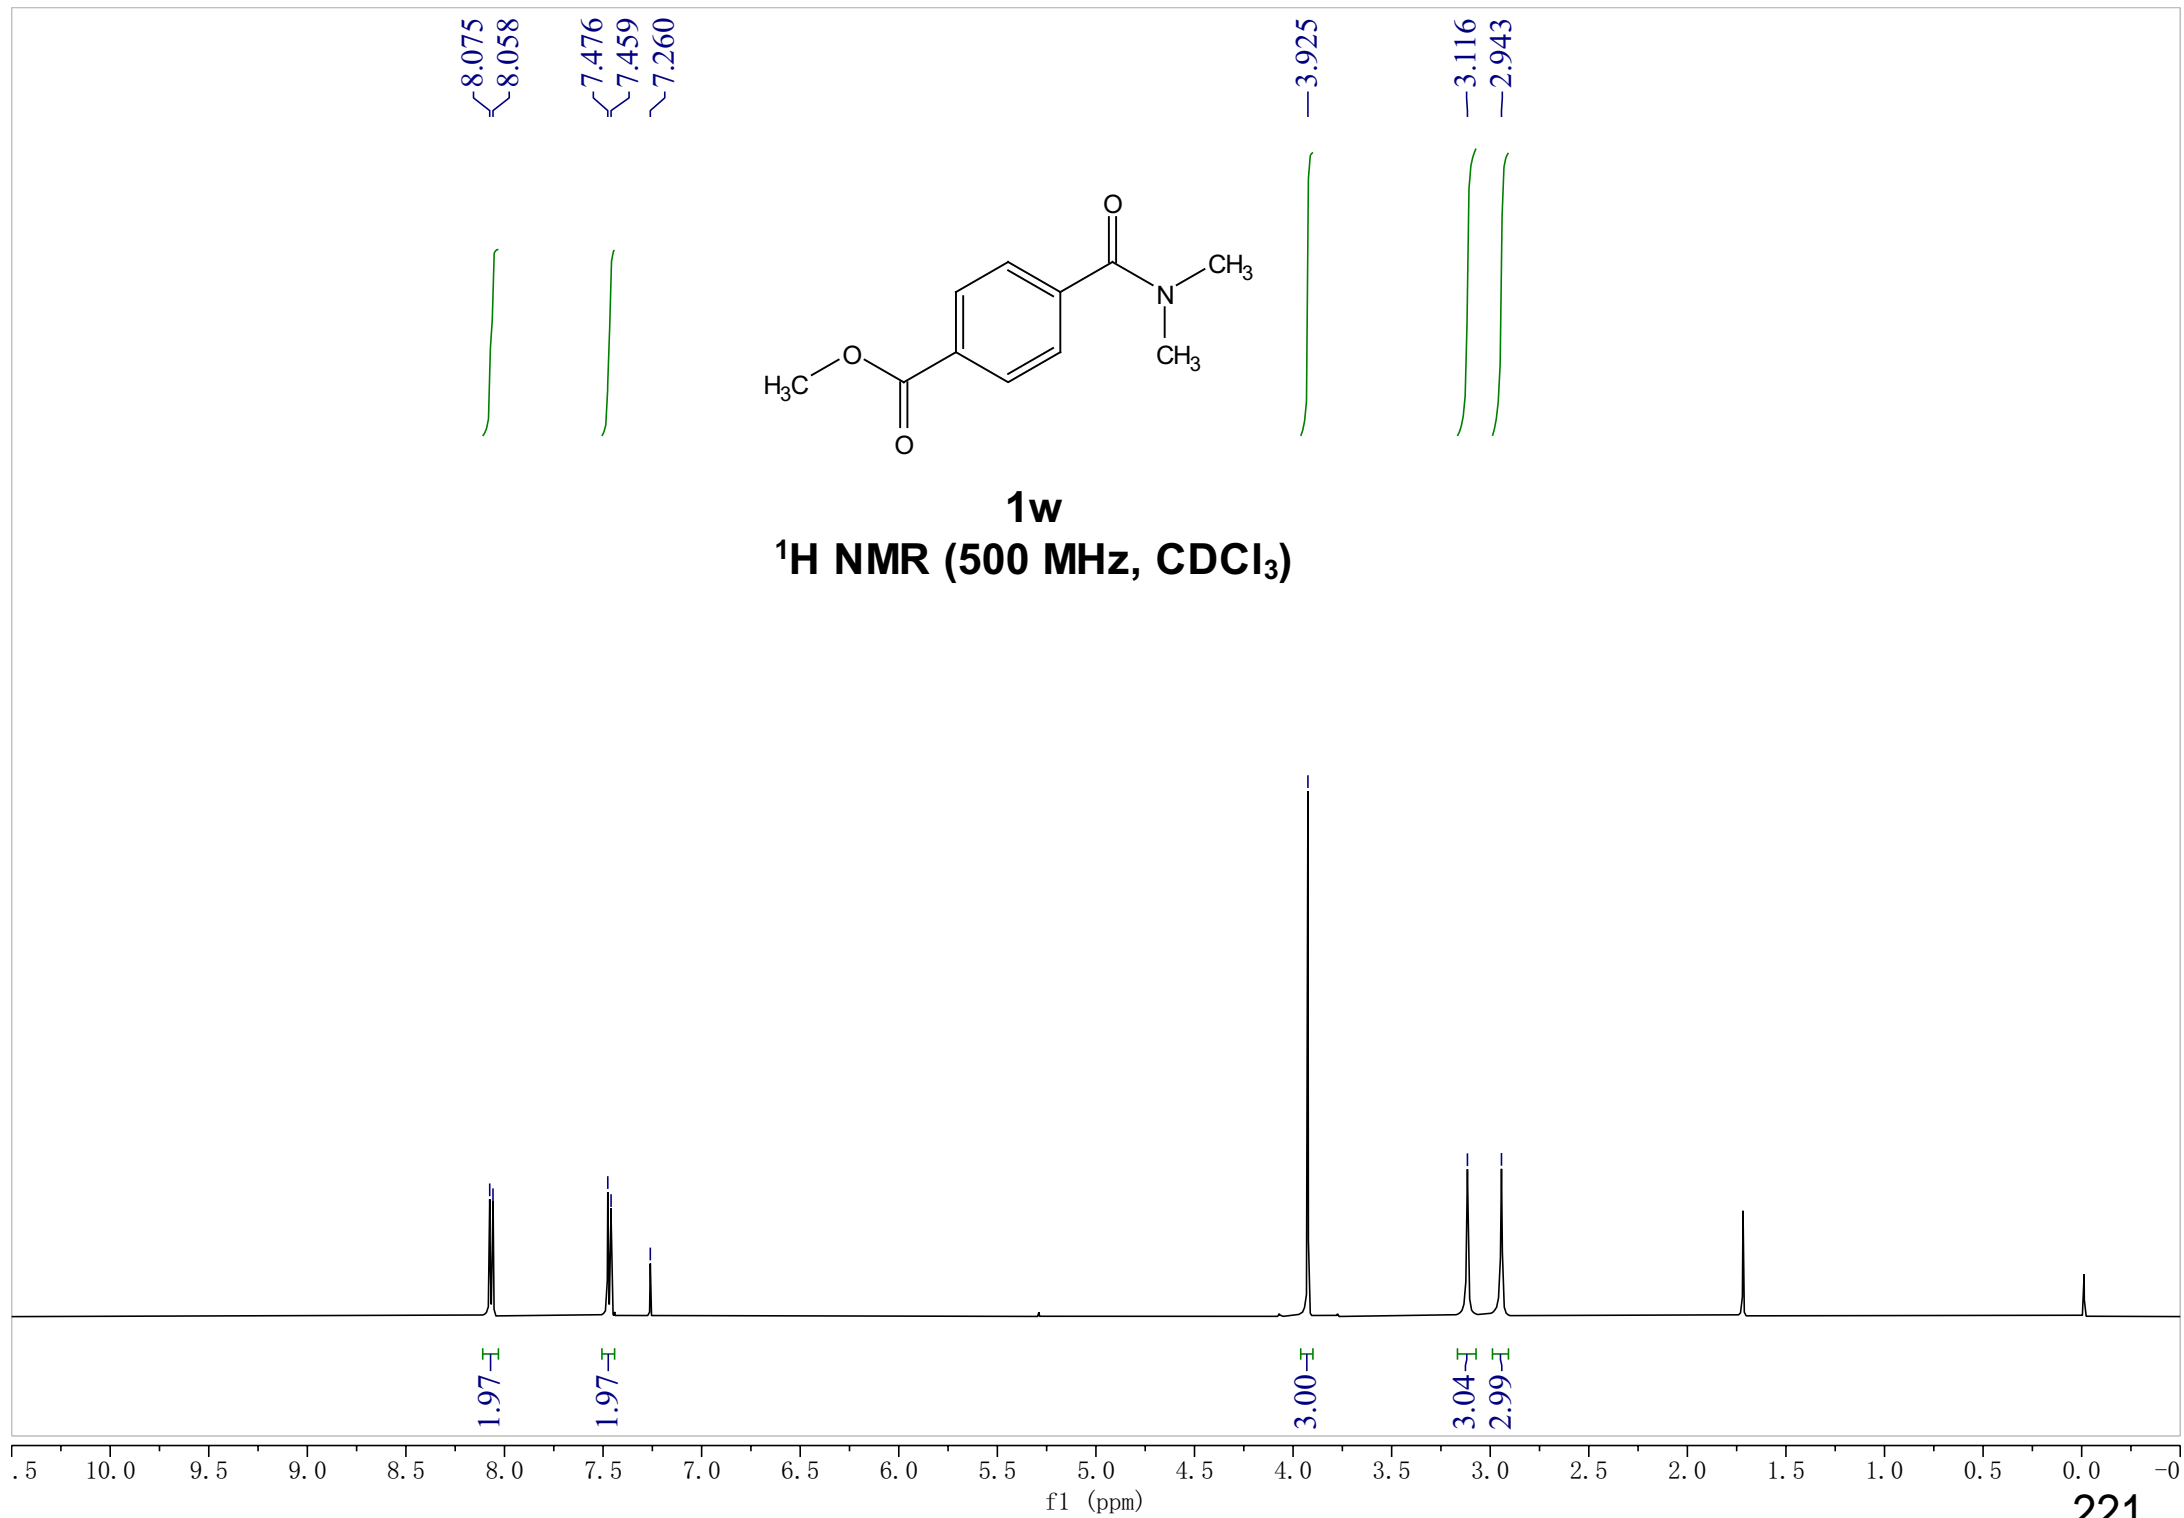

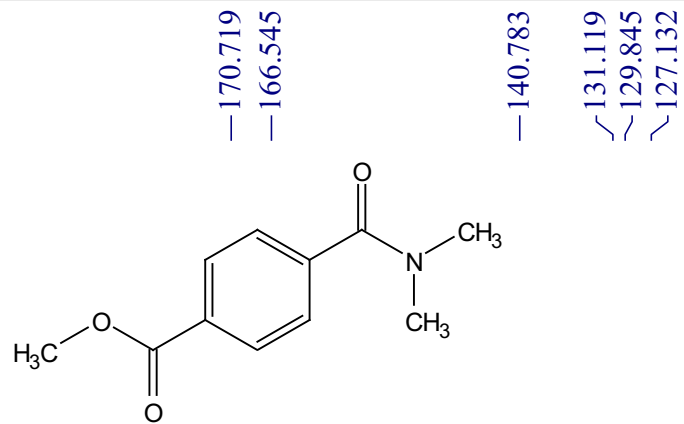

**1w**  
**<sup>13</sup>C NMR (125 MHz, CDCl<sub>3</sub>)**

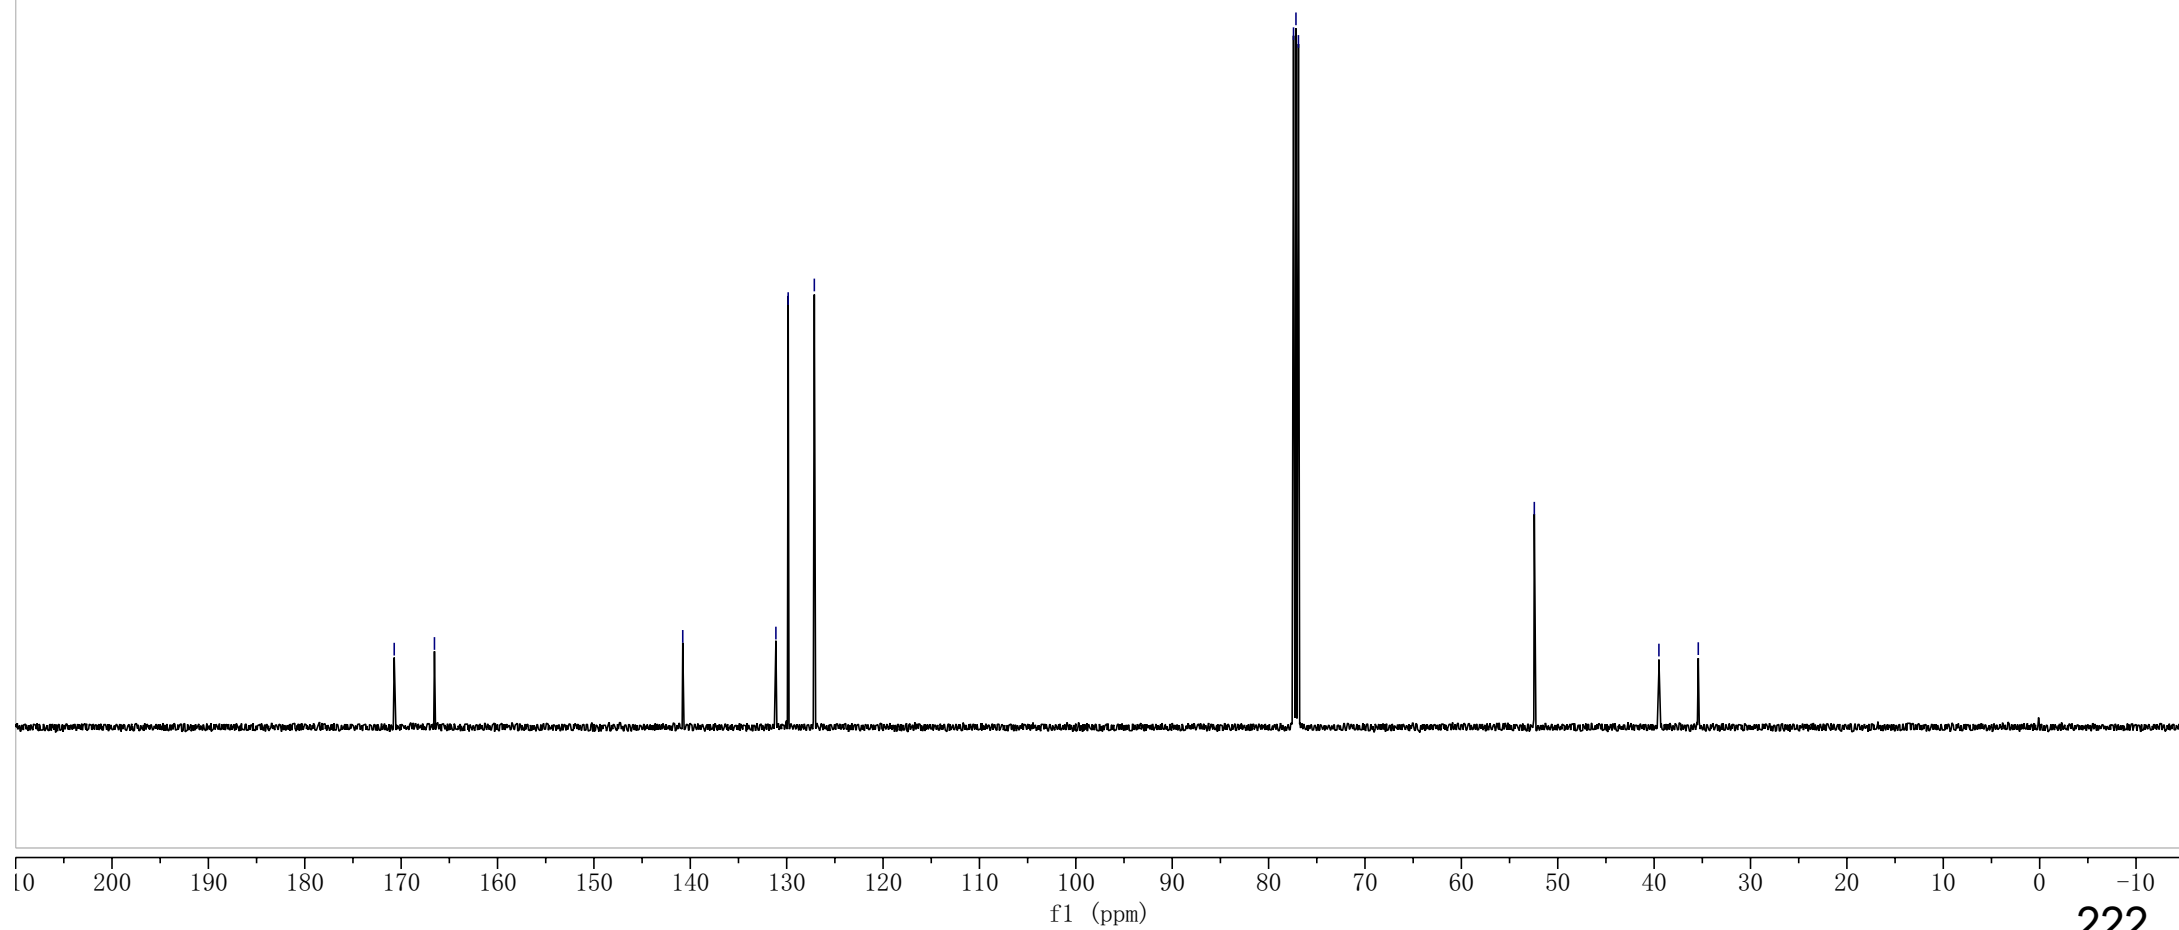

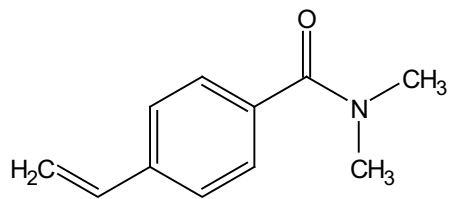

1x

<sup>1</sup>H NMR (500 MHz, CDCl<sub>3</sub>)

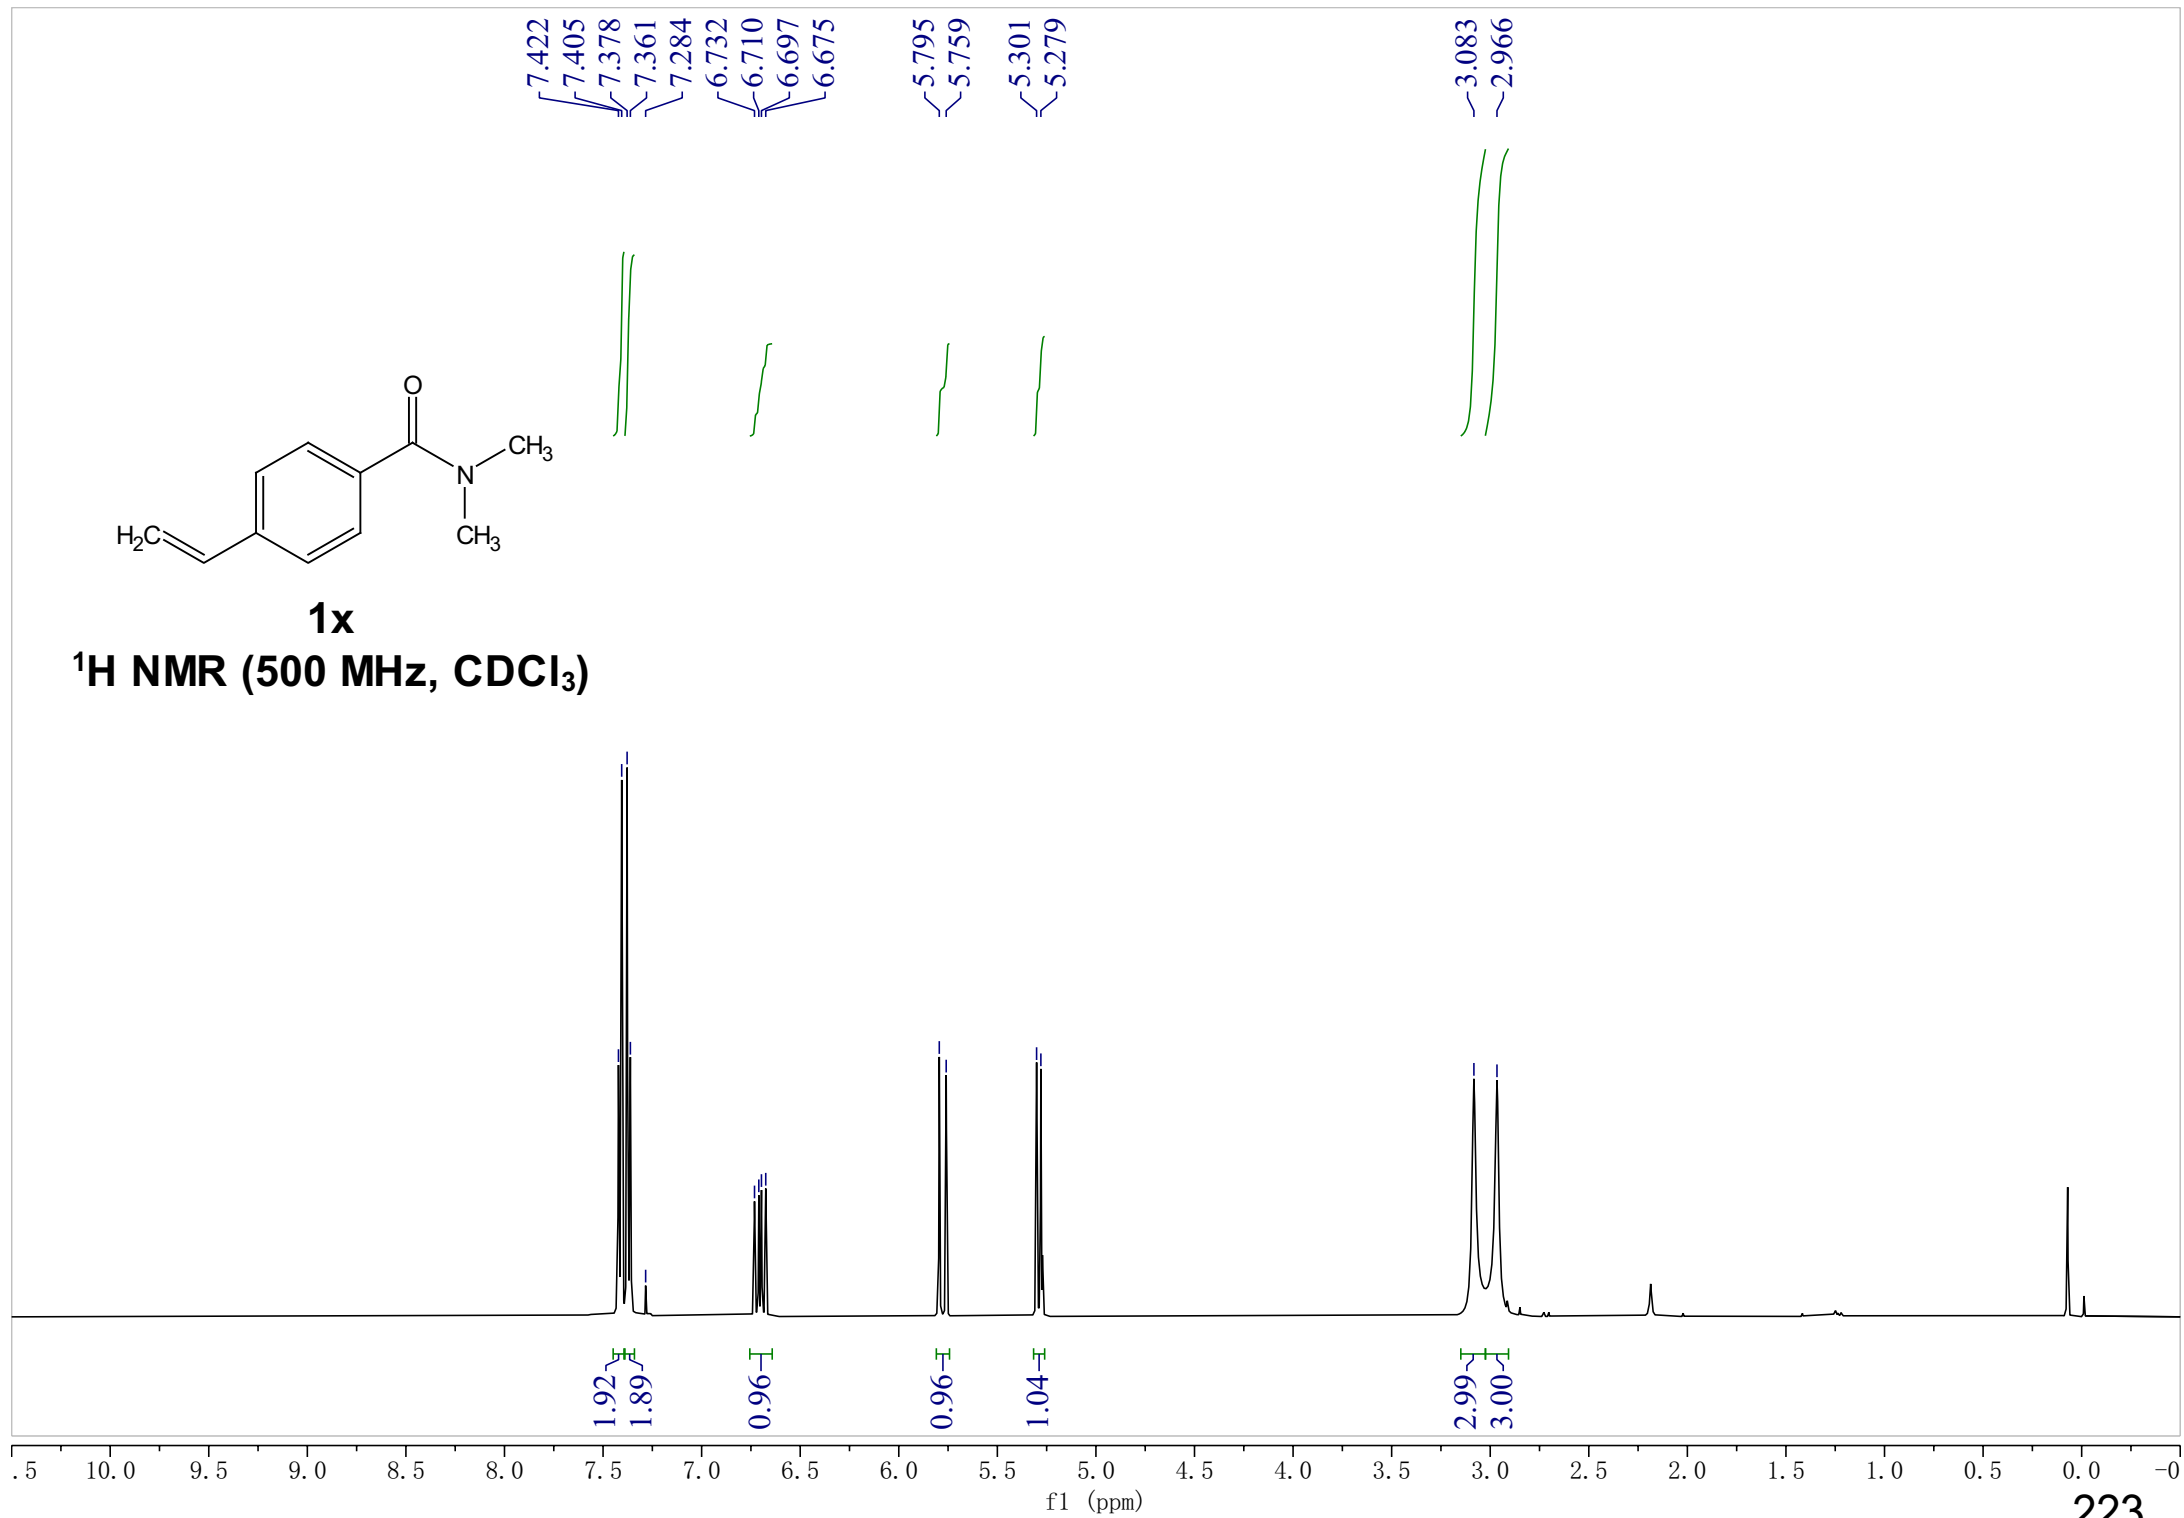



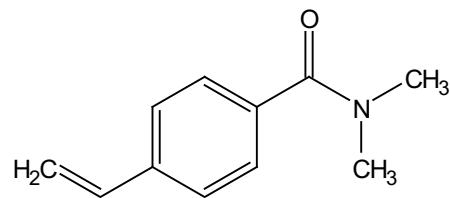

**1x**  
**<sup>13</sup>C NMR (125 MHz, CDCl<sub>3</sub>)**

—171.340

—138.750

—136.113

—135.507

—127.457

—126.075

—115.134

—77.414

—77.161

—76.905

—39.560

—35.357

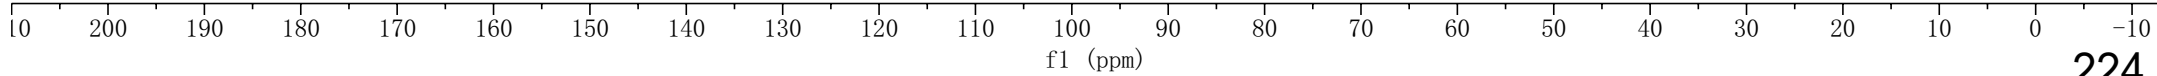

7.912  
7.878  
7.871  
7.861  
7.854  
7.845  
7.534  
7.531  
7.523  
7.517  
7.512  
7.504  
7.501  
7.260

3.162  
3.030

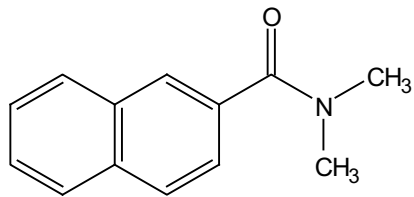

**1y**

**<sup>1</sup>H NMR (500 MHz, CDCl<sub>3</sub>)**

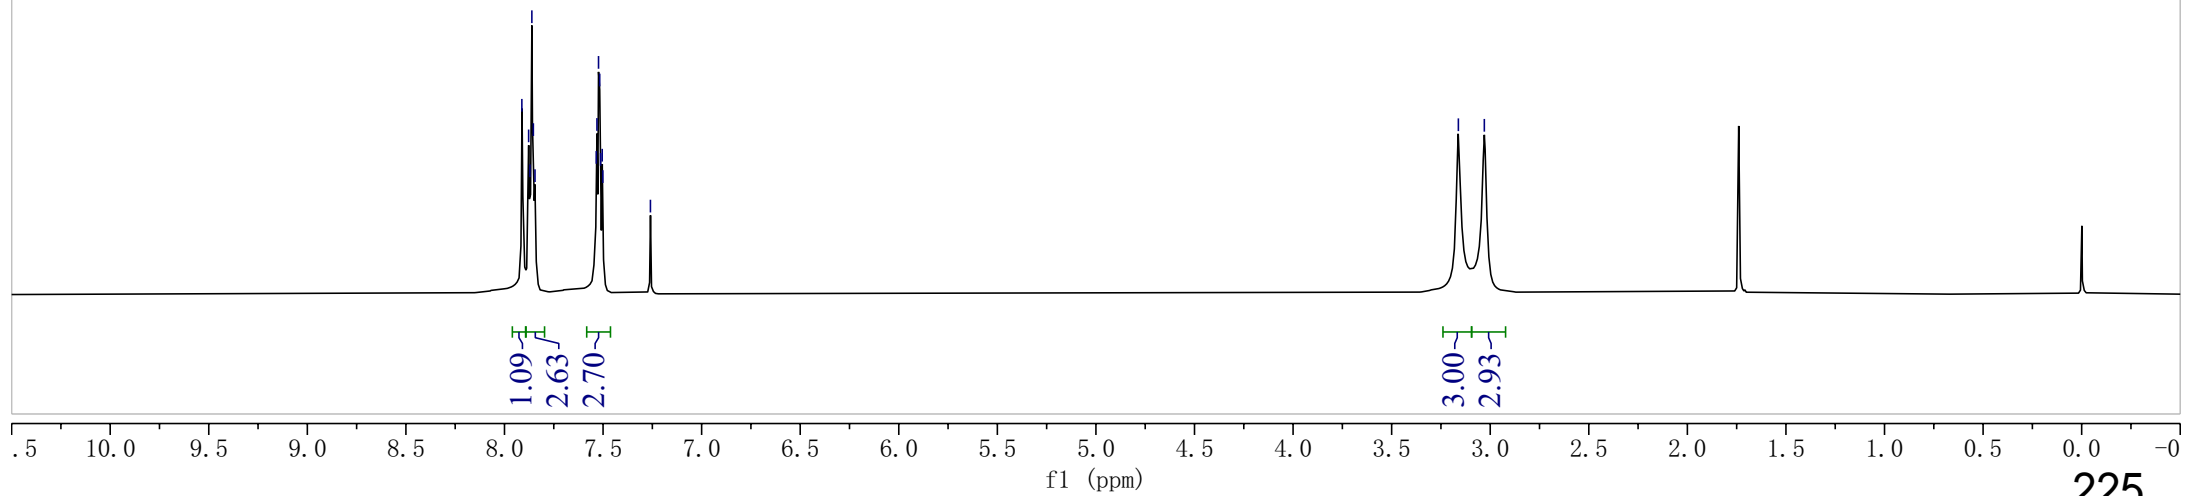

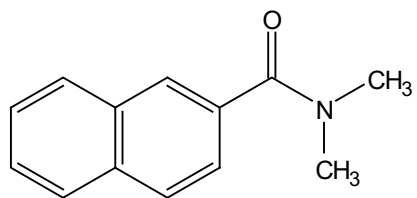

**1y**

**$^{13}\text{C}$  NMR (125 MHz,  $\text{CDCl}_3$ )**

—171.775

—133.767

—133.735

—132.802

—128.514

—128.296

—127.906

—127.092

—126.964

—126.733

—124.548

—77.414

—77.159

—76.906

—39.801

—35.578

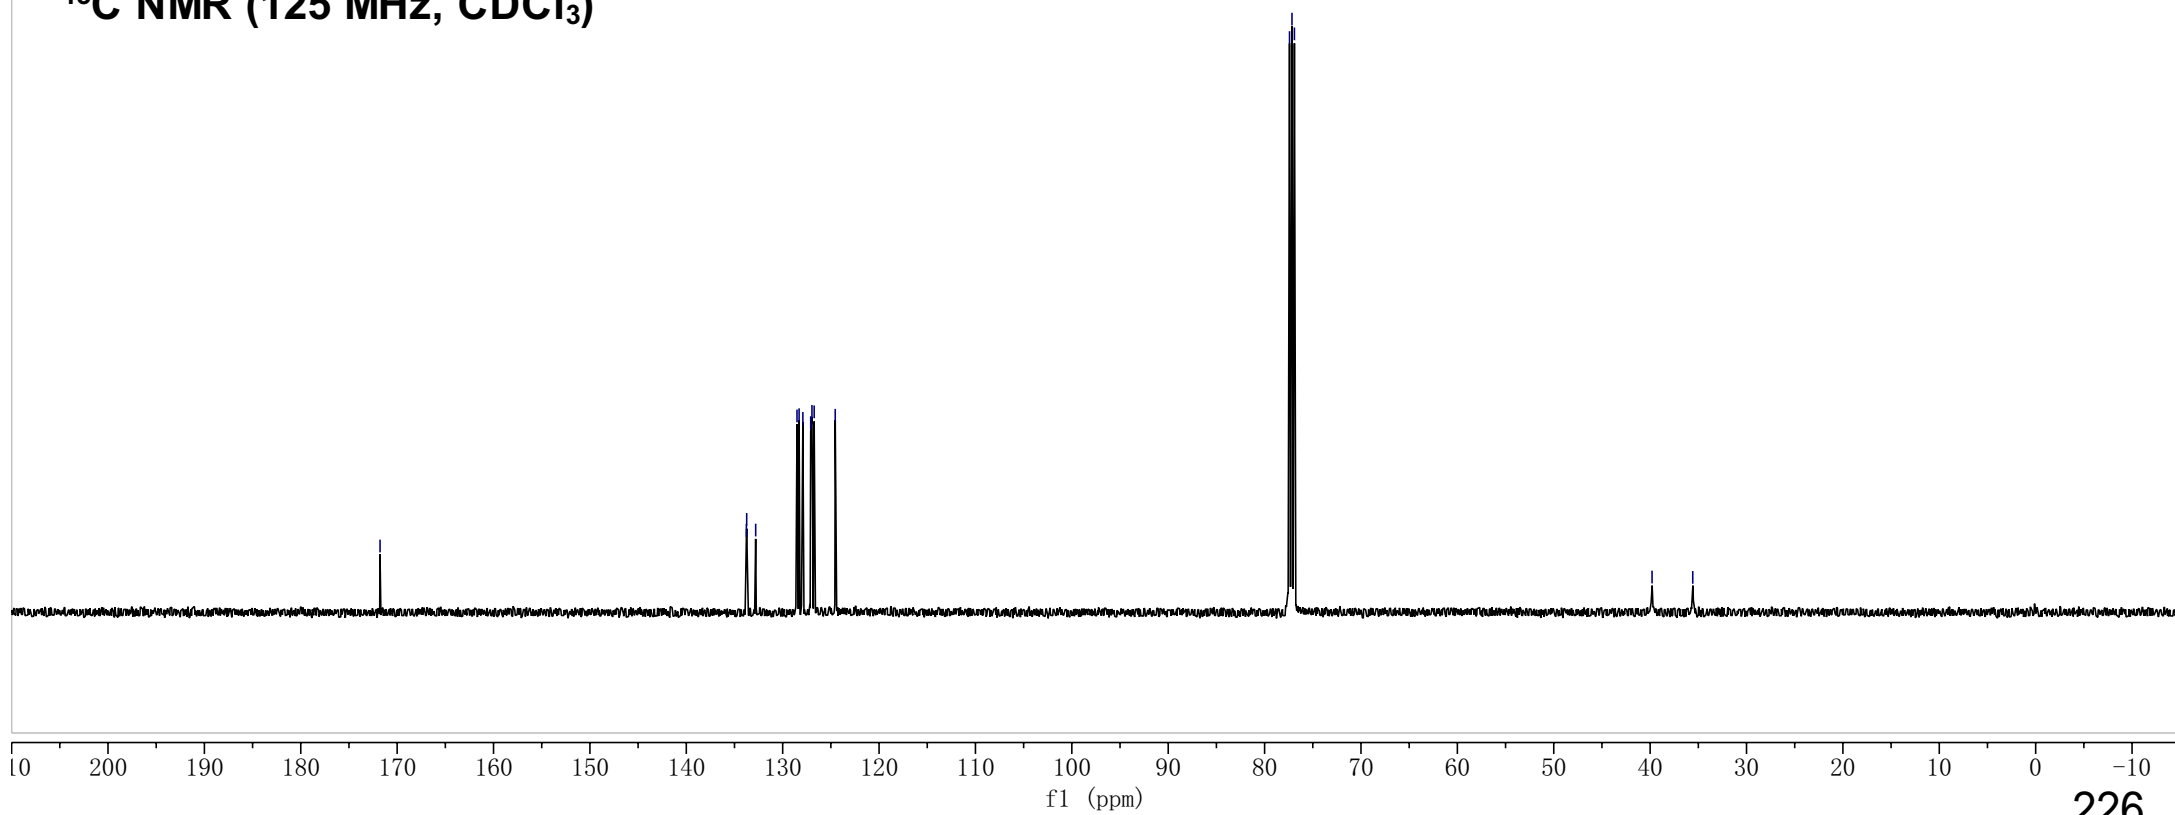

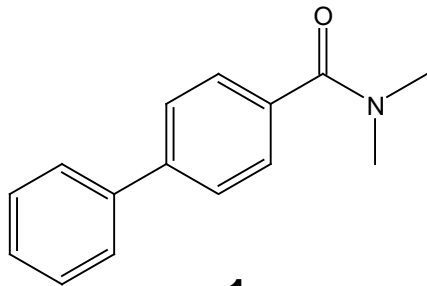

**1z**

**<sup>1</sup>H NMR (500 MHz, CDCl<sub>3</sub>)**

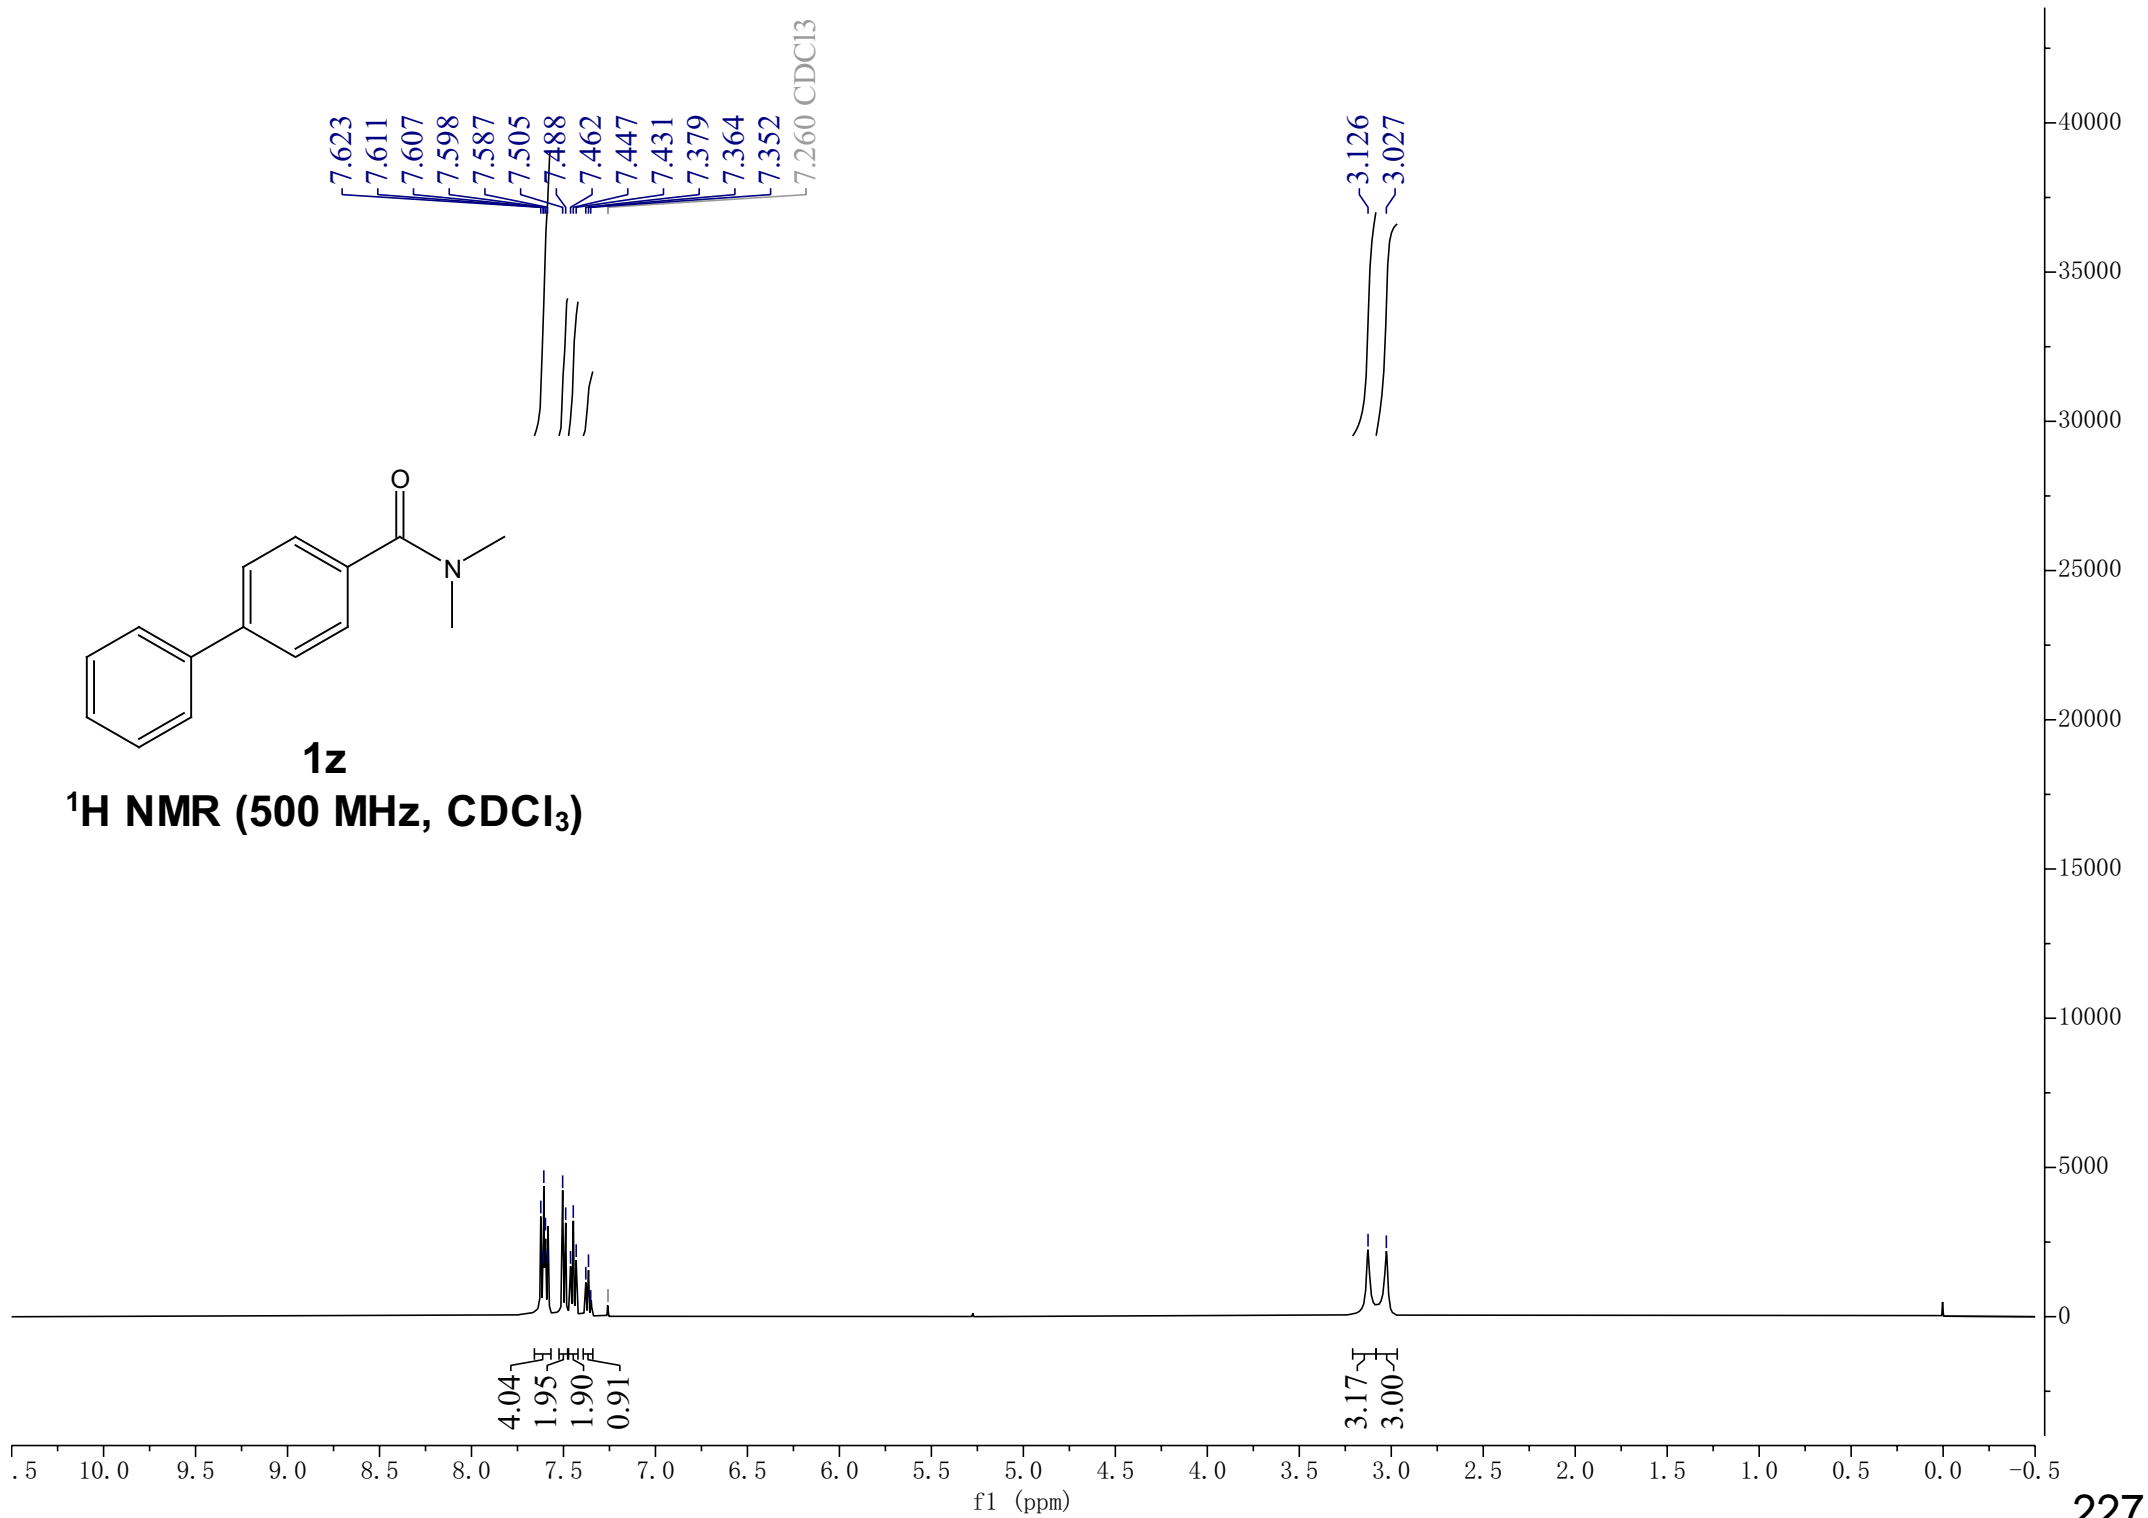

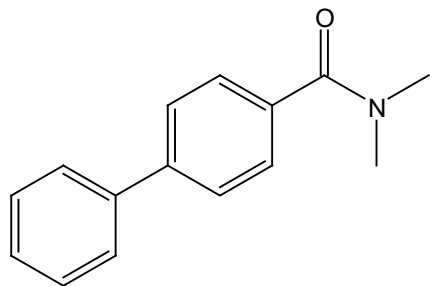

**1z**

**<sup>13</sup>C NMR (125 MHz, CDCl<sub>3</sub>)**

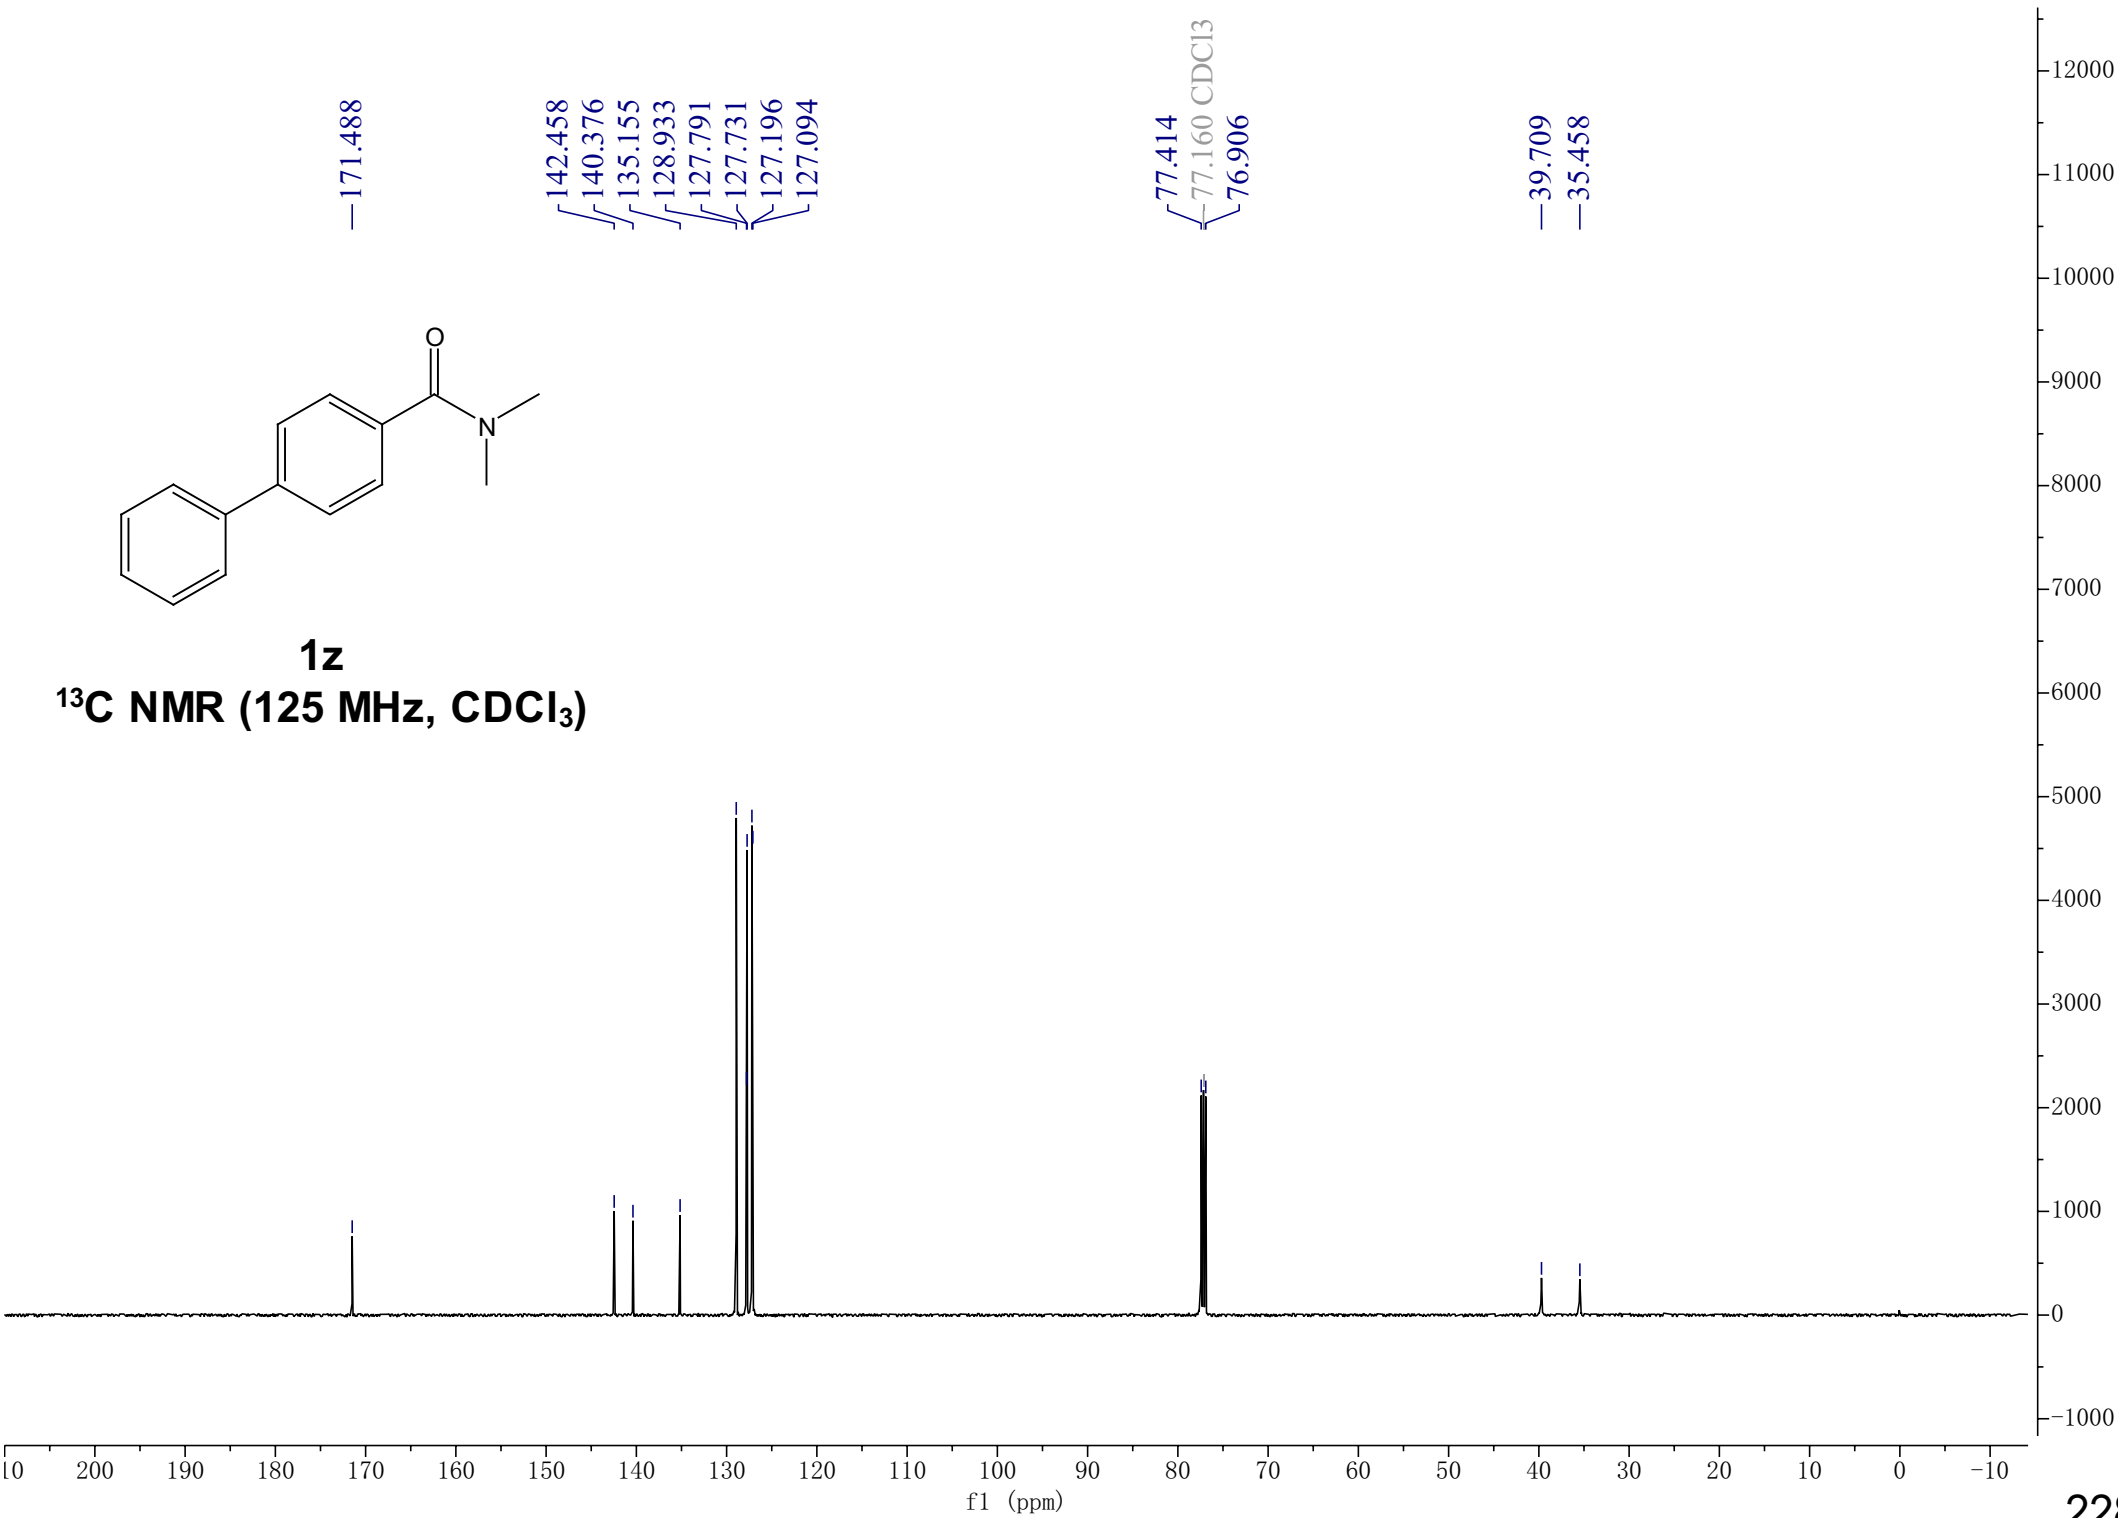

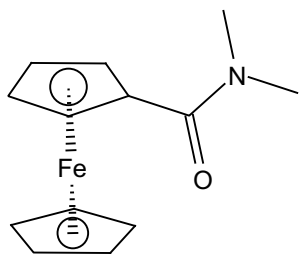

**1aa**

**<sup>1</sup>H NMR (400 MHz, CDCl<sub>3</sub>)**

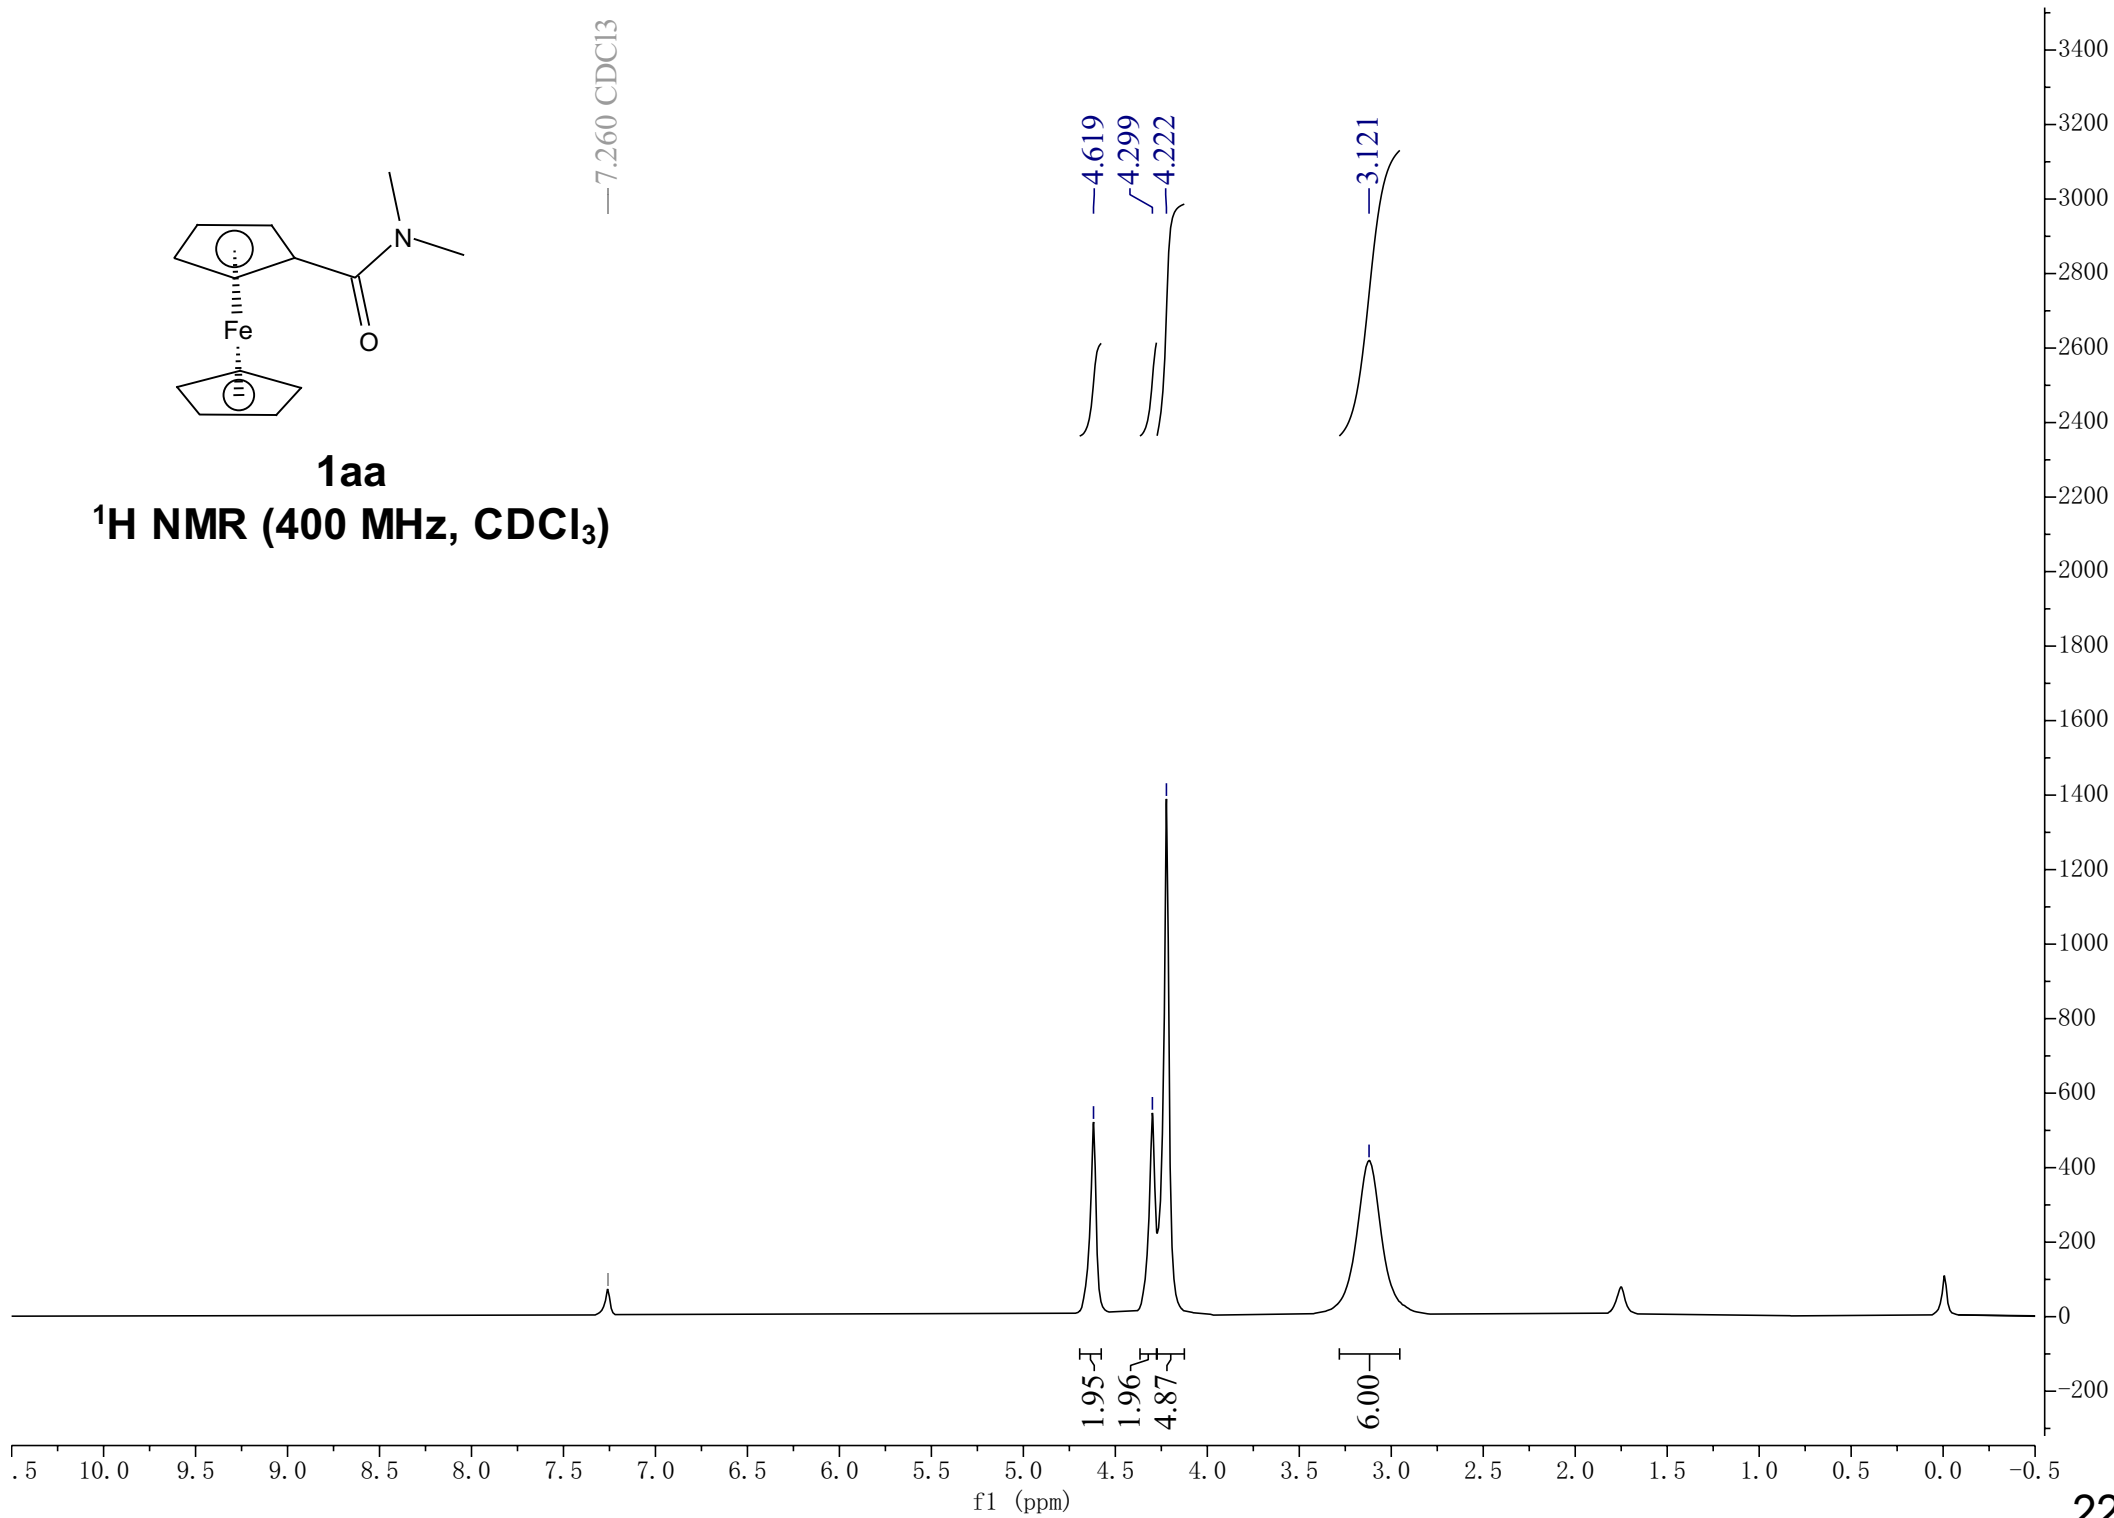

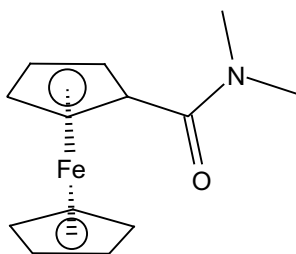

**1aa**

**$^{13}\text{C}$  NMR (100 MHz,  $\text{CDCl}_3$ )**

—170.875

78.582  
77.477  
77.160  $\text{CDCl}_3$   
76.839  
70.726  
69.869  
69.384

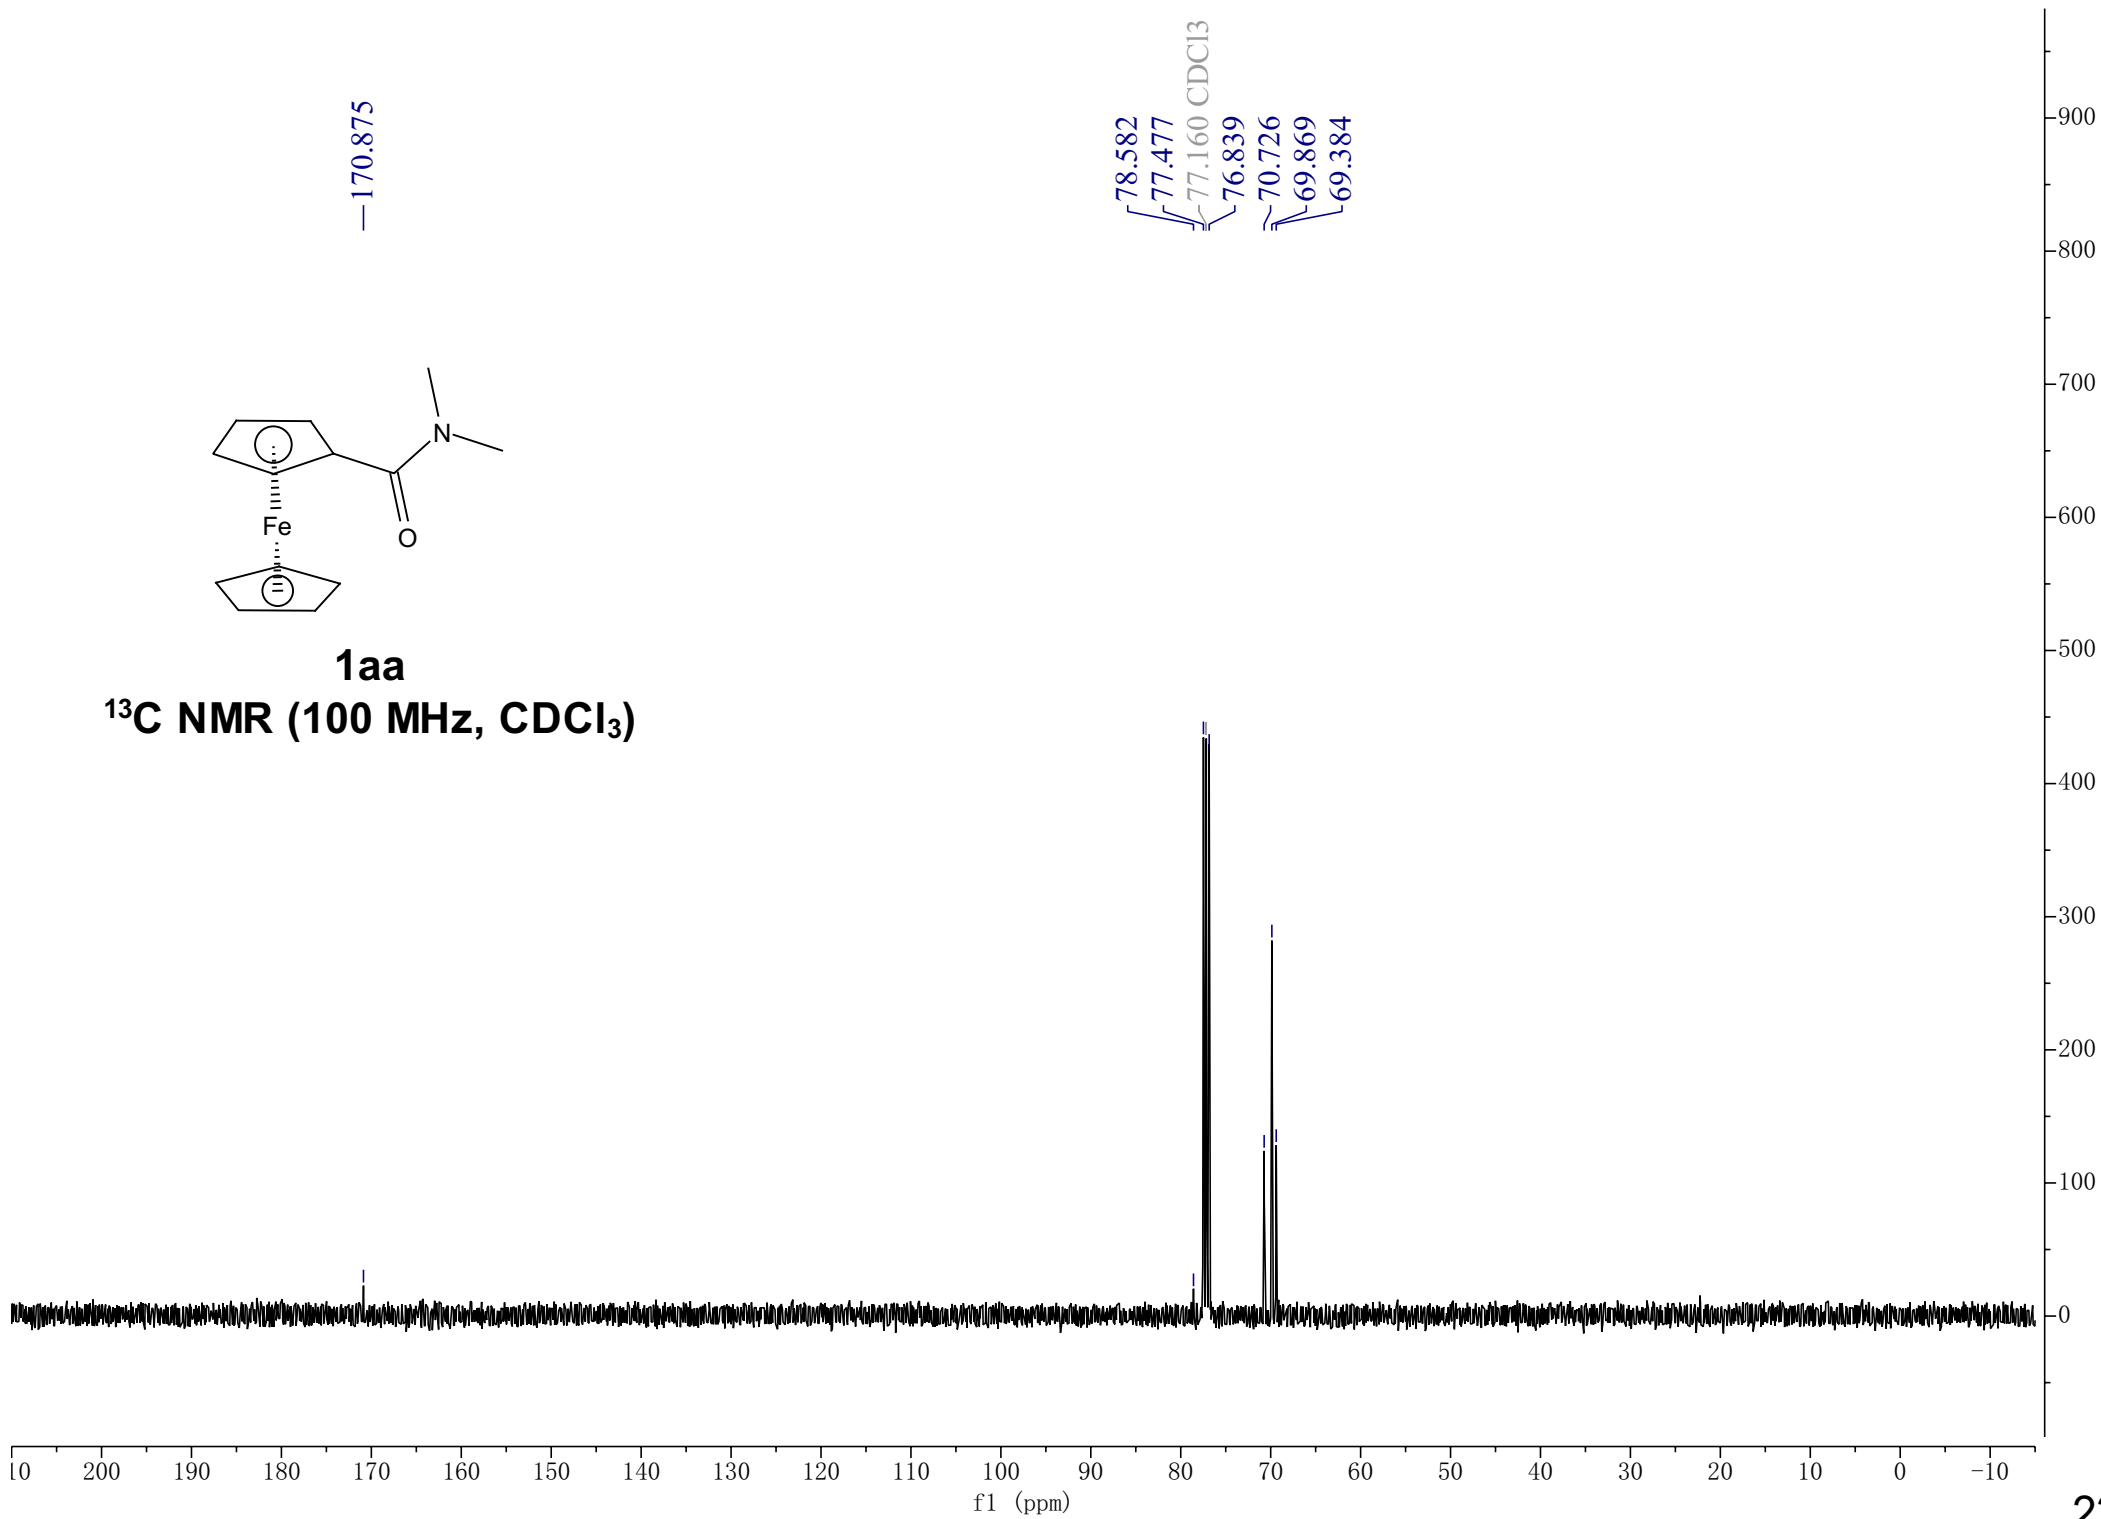

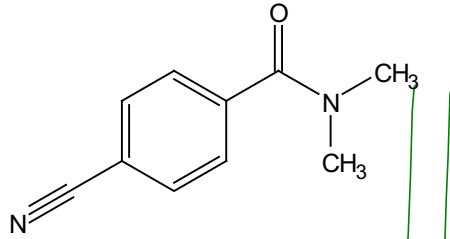

**1b**

**<sup>1</sup>H NMR (500 MHz, CDCl<sub>3</sub>)**

7.658  
7.655  
7.651  
7.646  
7.642  
7.638  
7.634  
7.470  
7.466  
7.462  
7.453  
7.449  
7.260

3.049  
2.884

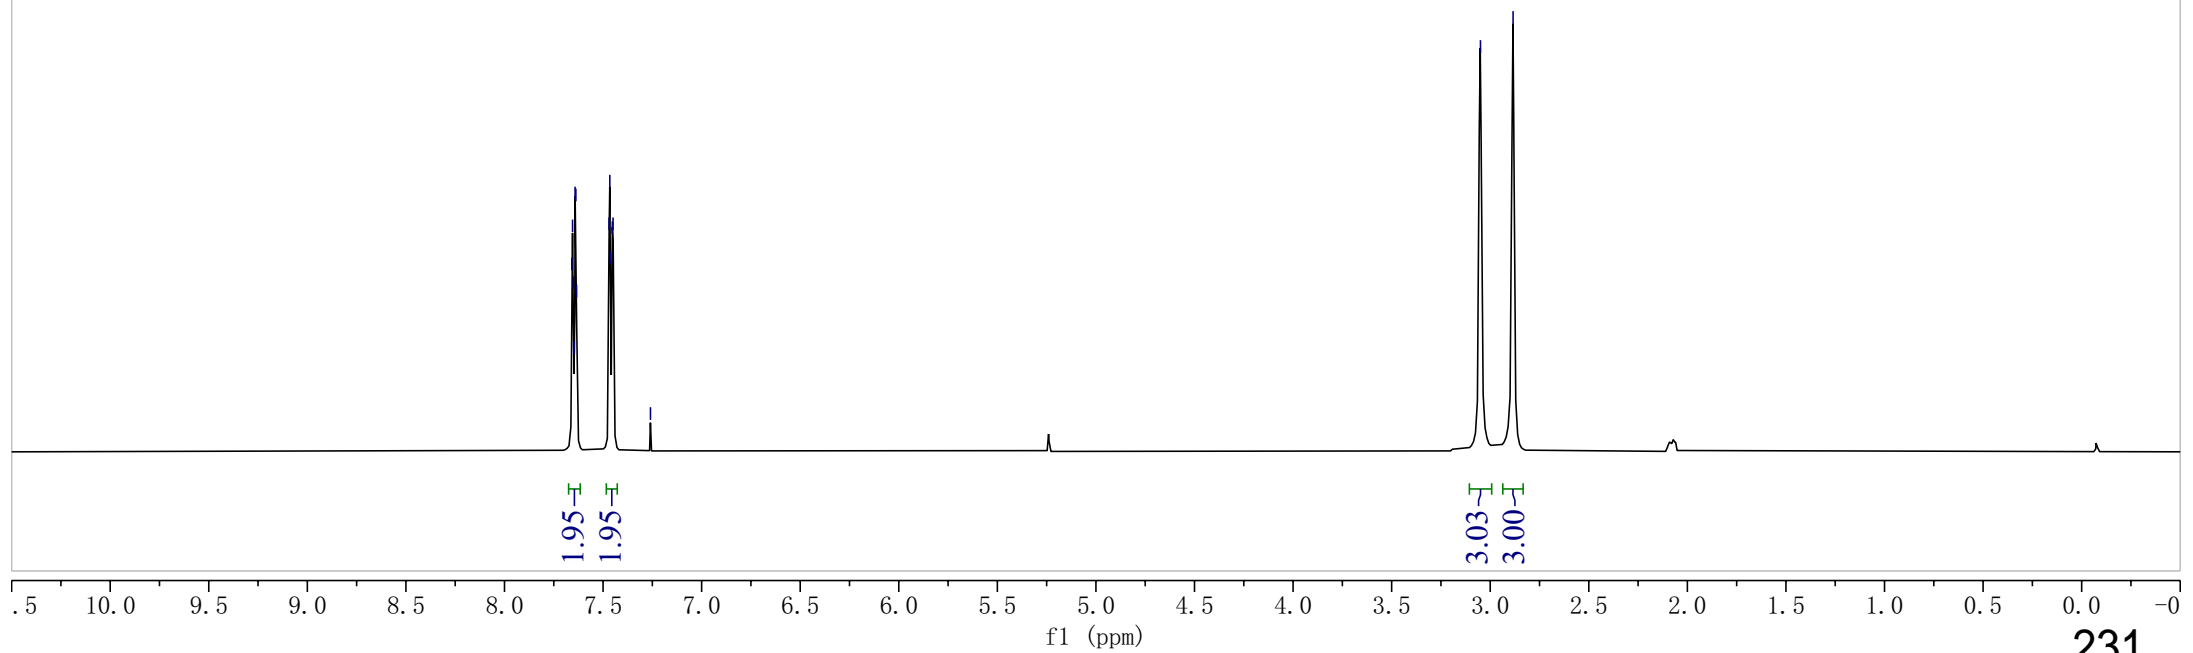



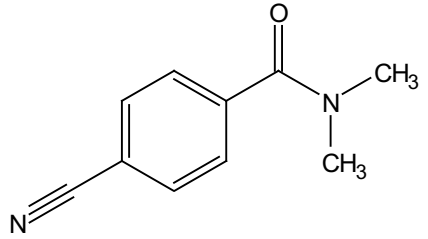

**1b**

**<sup>13</sup>C NMR (125 MHz, CDCl<sub>3</sub>)**

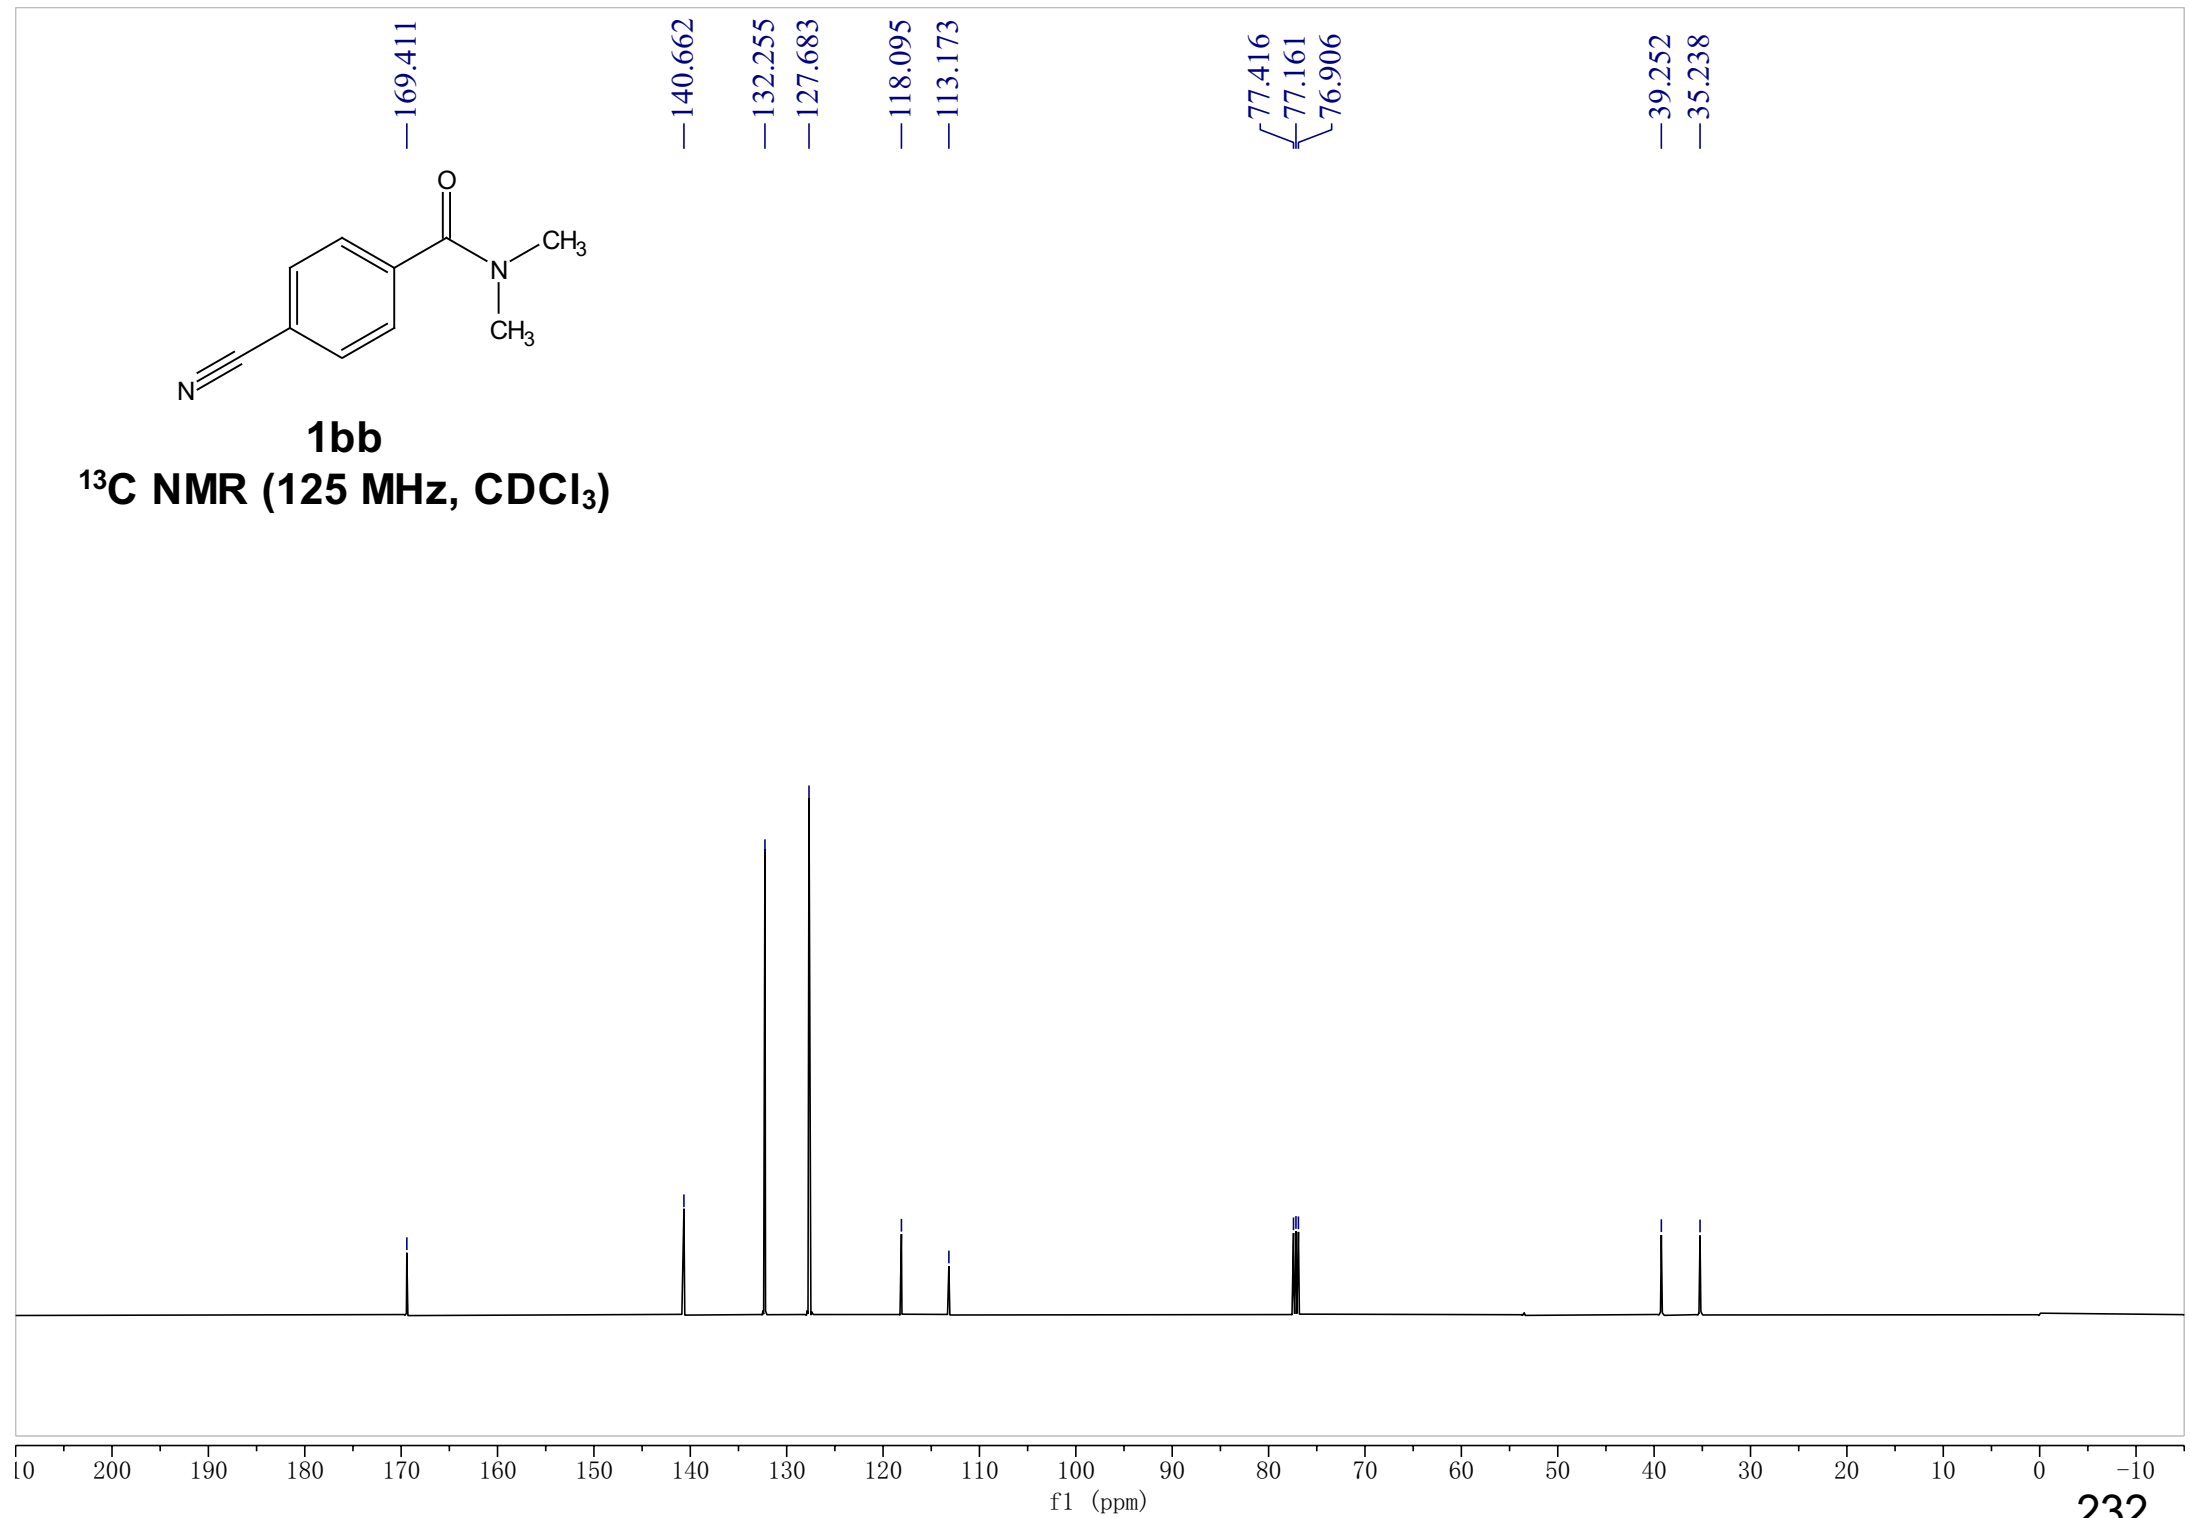

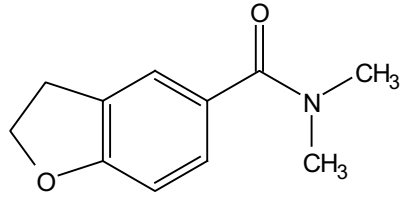

**1cc**

**<sup>1</sup>H NMR (500 MHz, CDCl<sub>3</sub>)**

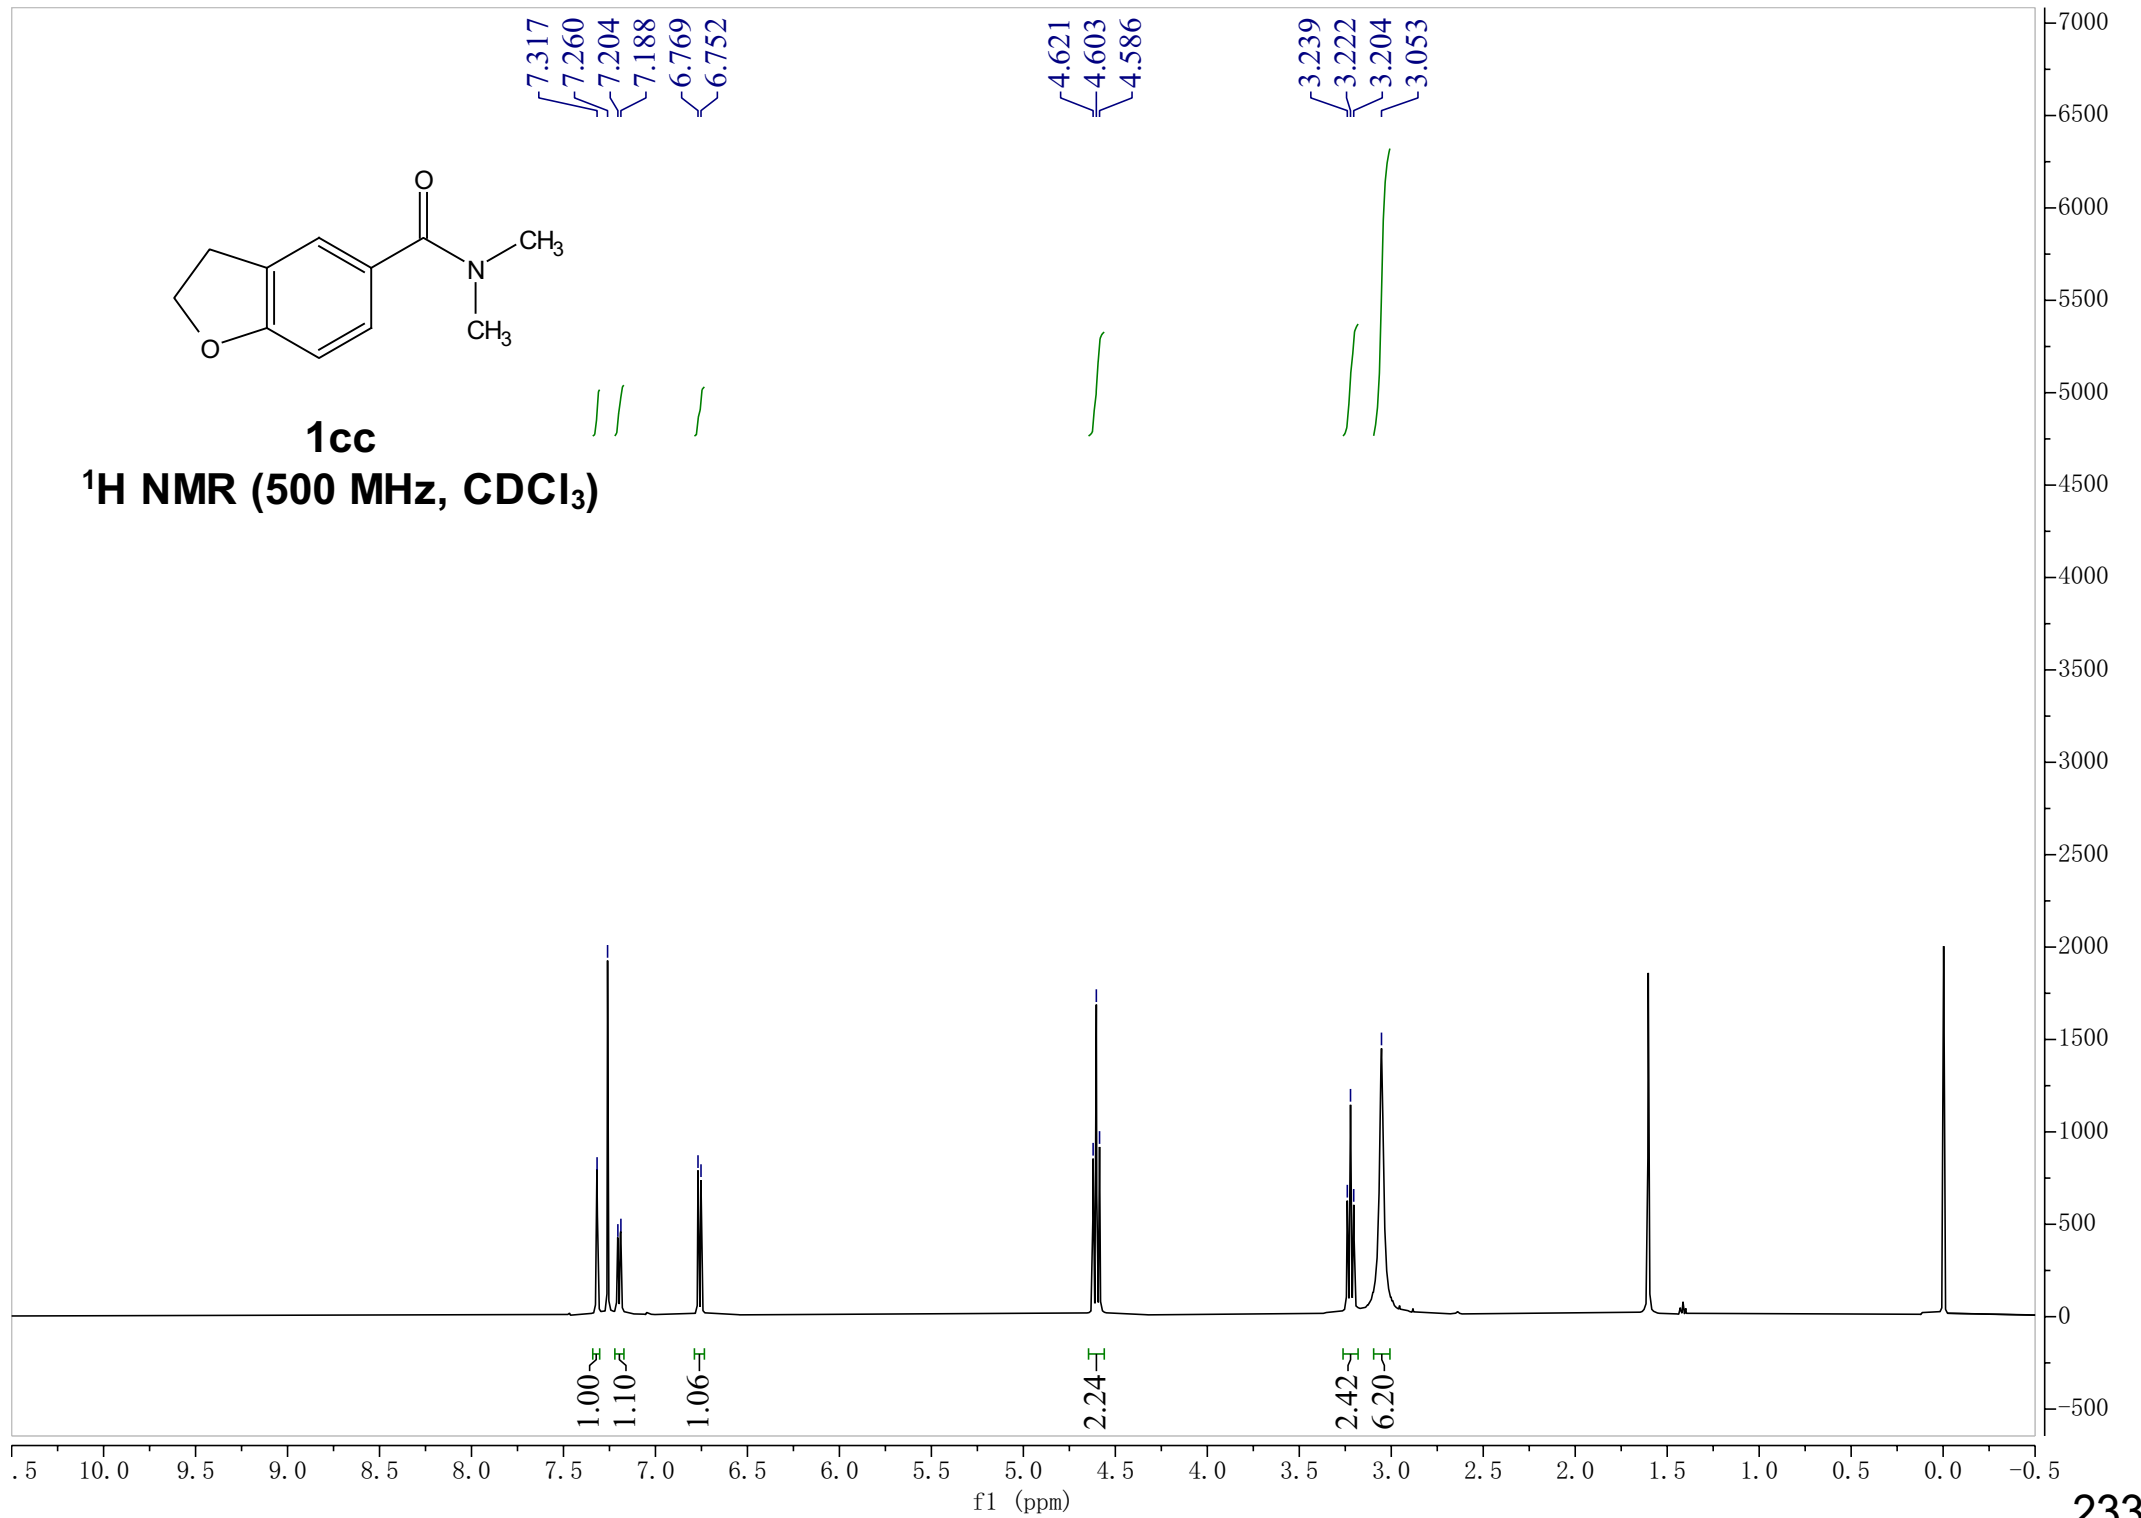

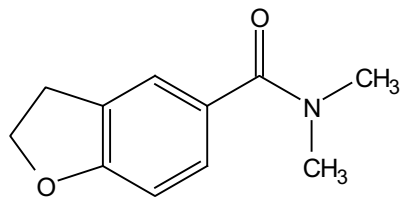

**1cc**

**$^{13}\text{C}$  NMR (125 MHz,  $\text{CDCl}_3$ )**

—171.923

—161.372

—128.507

—127.997

—127.300

—124.760

—108.829

—77.415

—77.160

—76.906

—71.679

—39.945

—35.753

—29.520

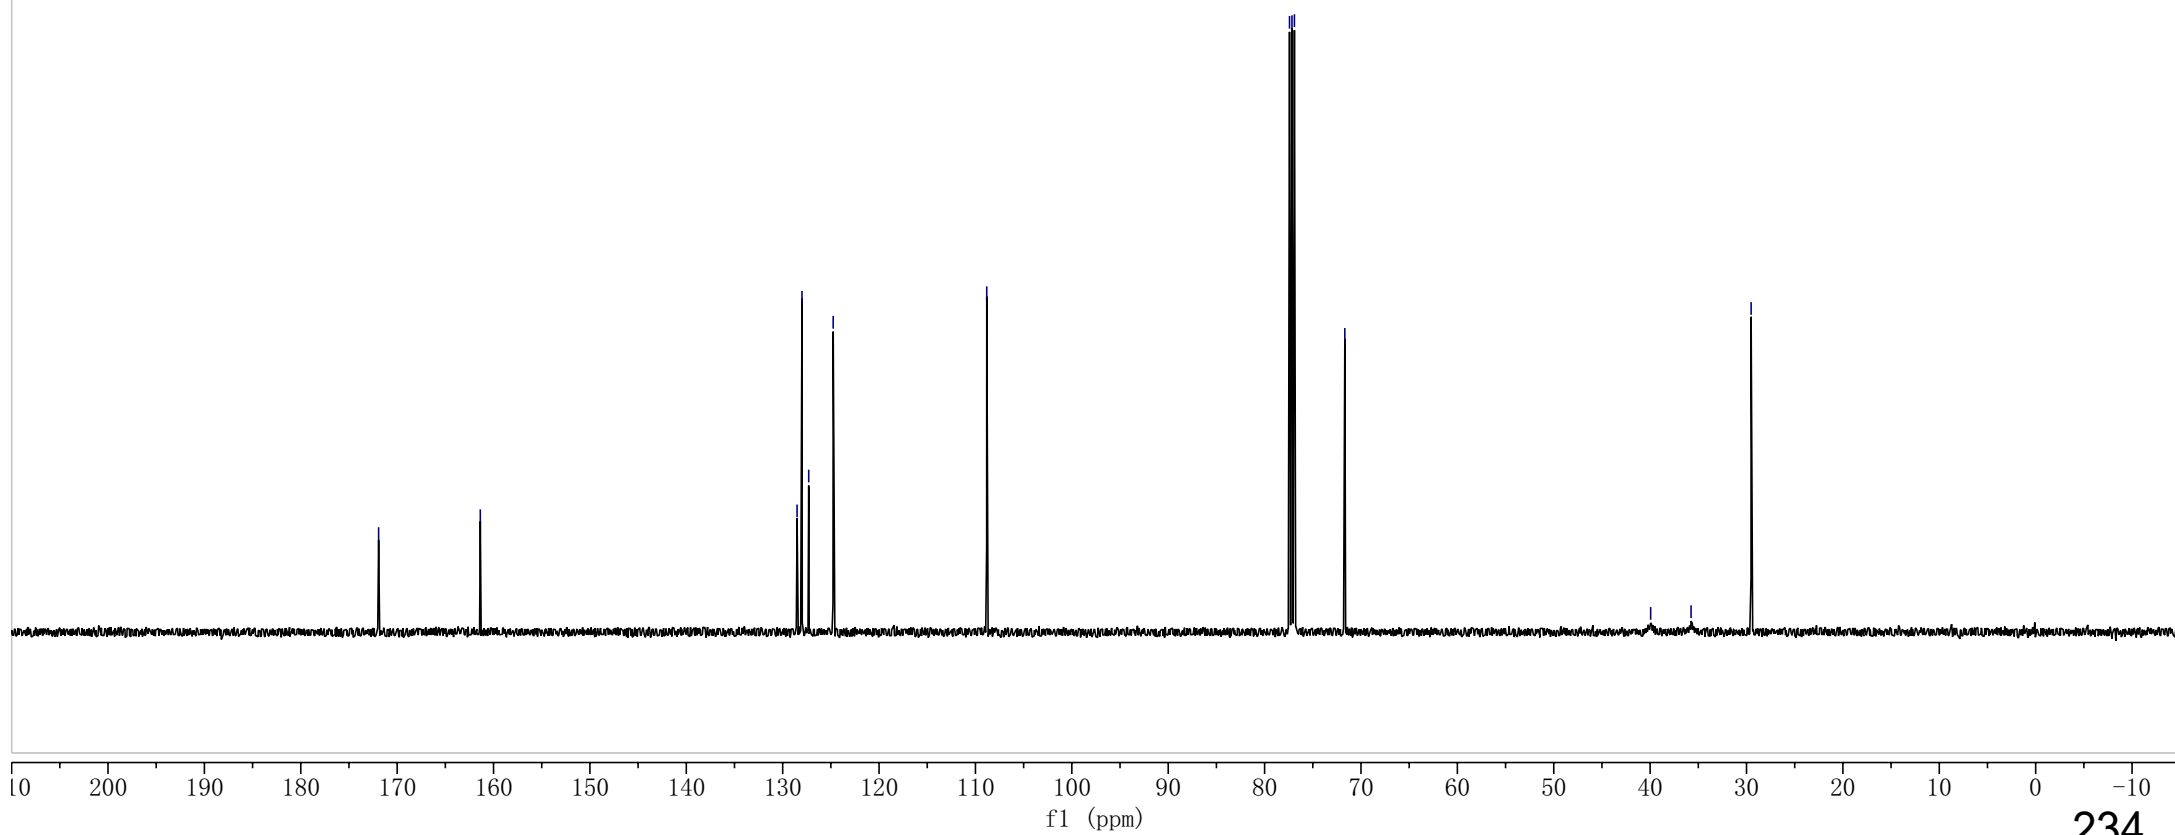

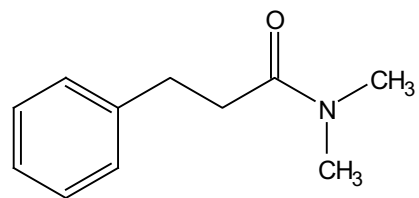

1dd

<sup>1</sup>H NMR (500 MHz, CDCl<sub>3</sub>)

7.318  
7.303  
7.288  
7.251  
7.247  
7.233  
7.213  
7.199

3.003  
2.987  
2.971  
2.964  
2.941  
2.647  
2.630  
2.615

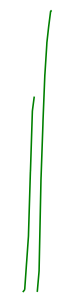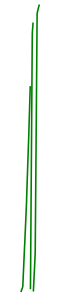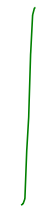

2.04  
2.95

2.15  
2.82  
3.01  
2.07

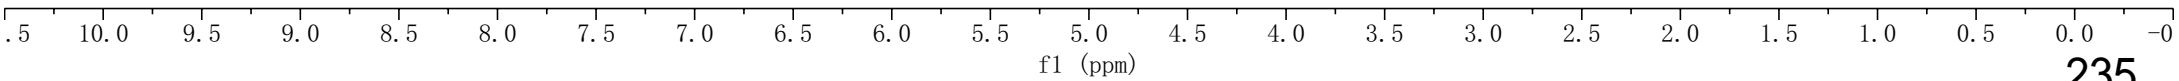

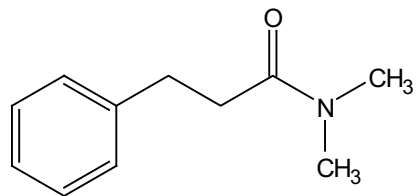

**1dd**

**$^{13}\text{C}$  NMR (125 MHz,  $\text{CDCl}_3$ )**

—172.256

—141.571

—128.528

—128.492

—126.155

—77.415

—77.161

—76.907

—37.220

—35.493

—35.363

—31.447

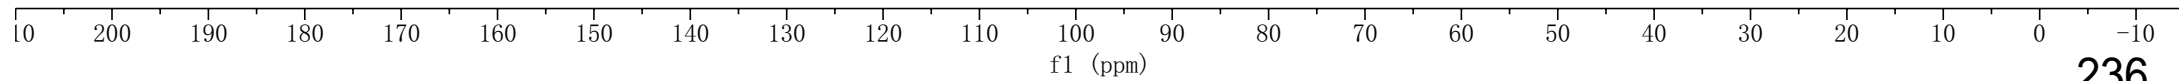

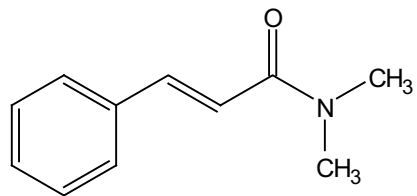

**1ee**

**<sup>1</sup>H NMR (500 MHz, CDCl<sub>3</sub>)**

7.676  
7.645  
7.524  
7.511  
7.374  
7.362  
7.347  
7.330  
7.260  
6.898  
6.867

3.161  
3.058

0.98  
1.97  
2.91

0.95

3.07  
3.00

10.0 9.5 9.0 8.5 8.0 7.5 7.0 6.5 6.0 5.5 5.0 4.5 4.0 3.5 3.0 2.5 2.0 1.5 1.0 0.5 0.0 -0.5

f1 (ppm)

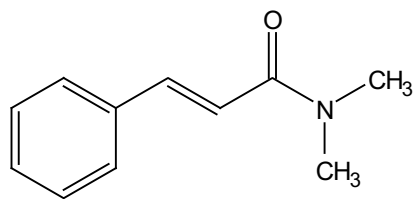

**1ee**

**$^{13}\text{C}$  NMR (125 MHz,  $\text{CDCl}_3$ )**

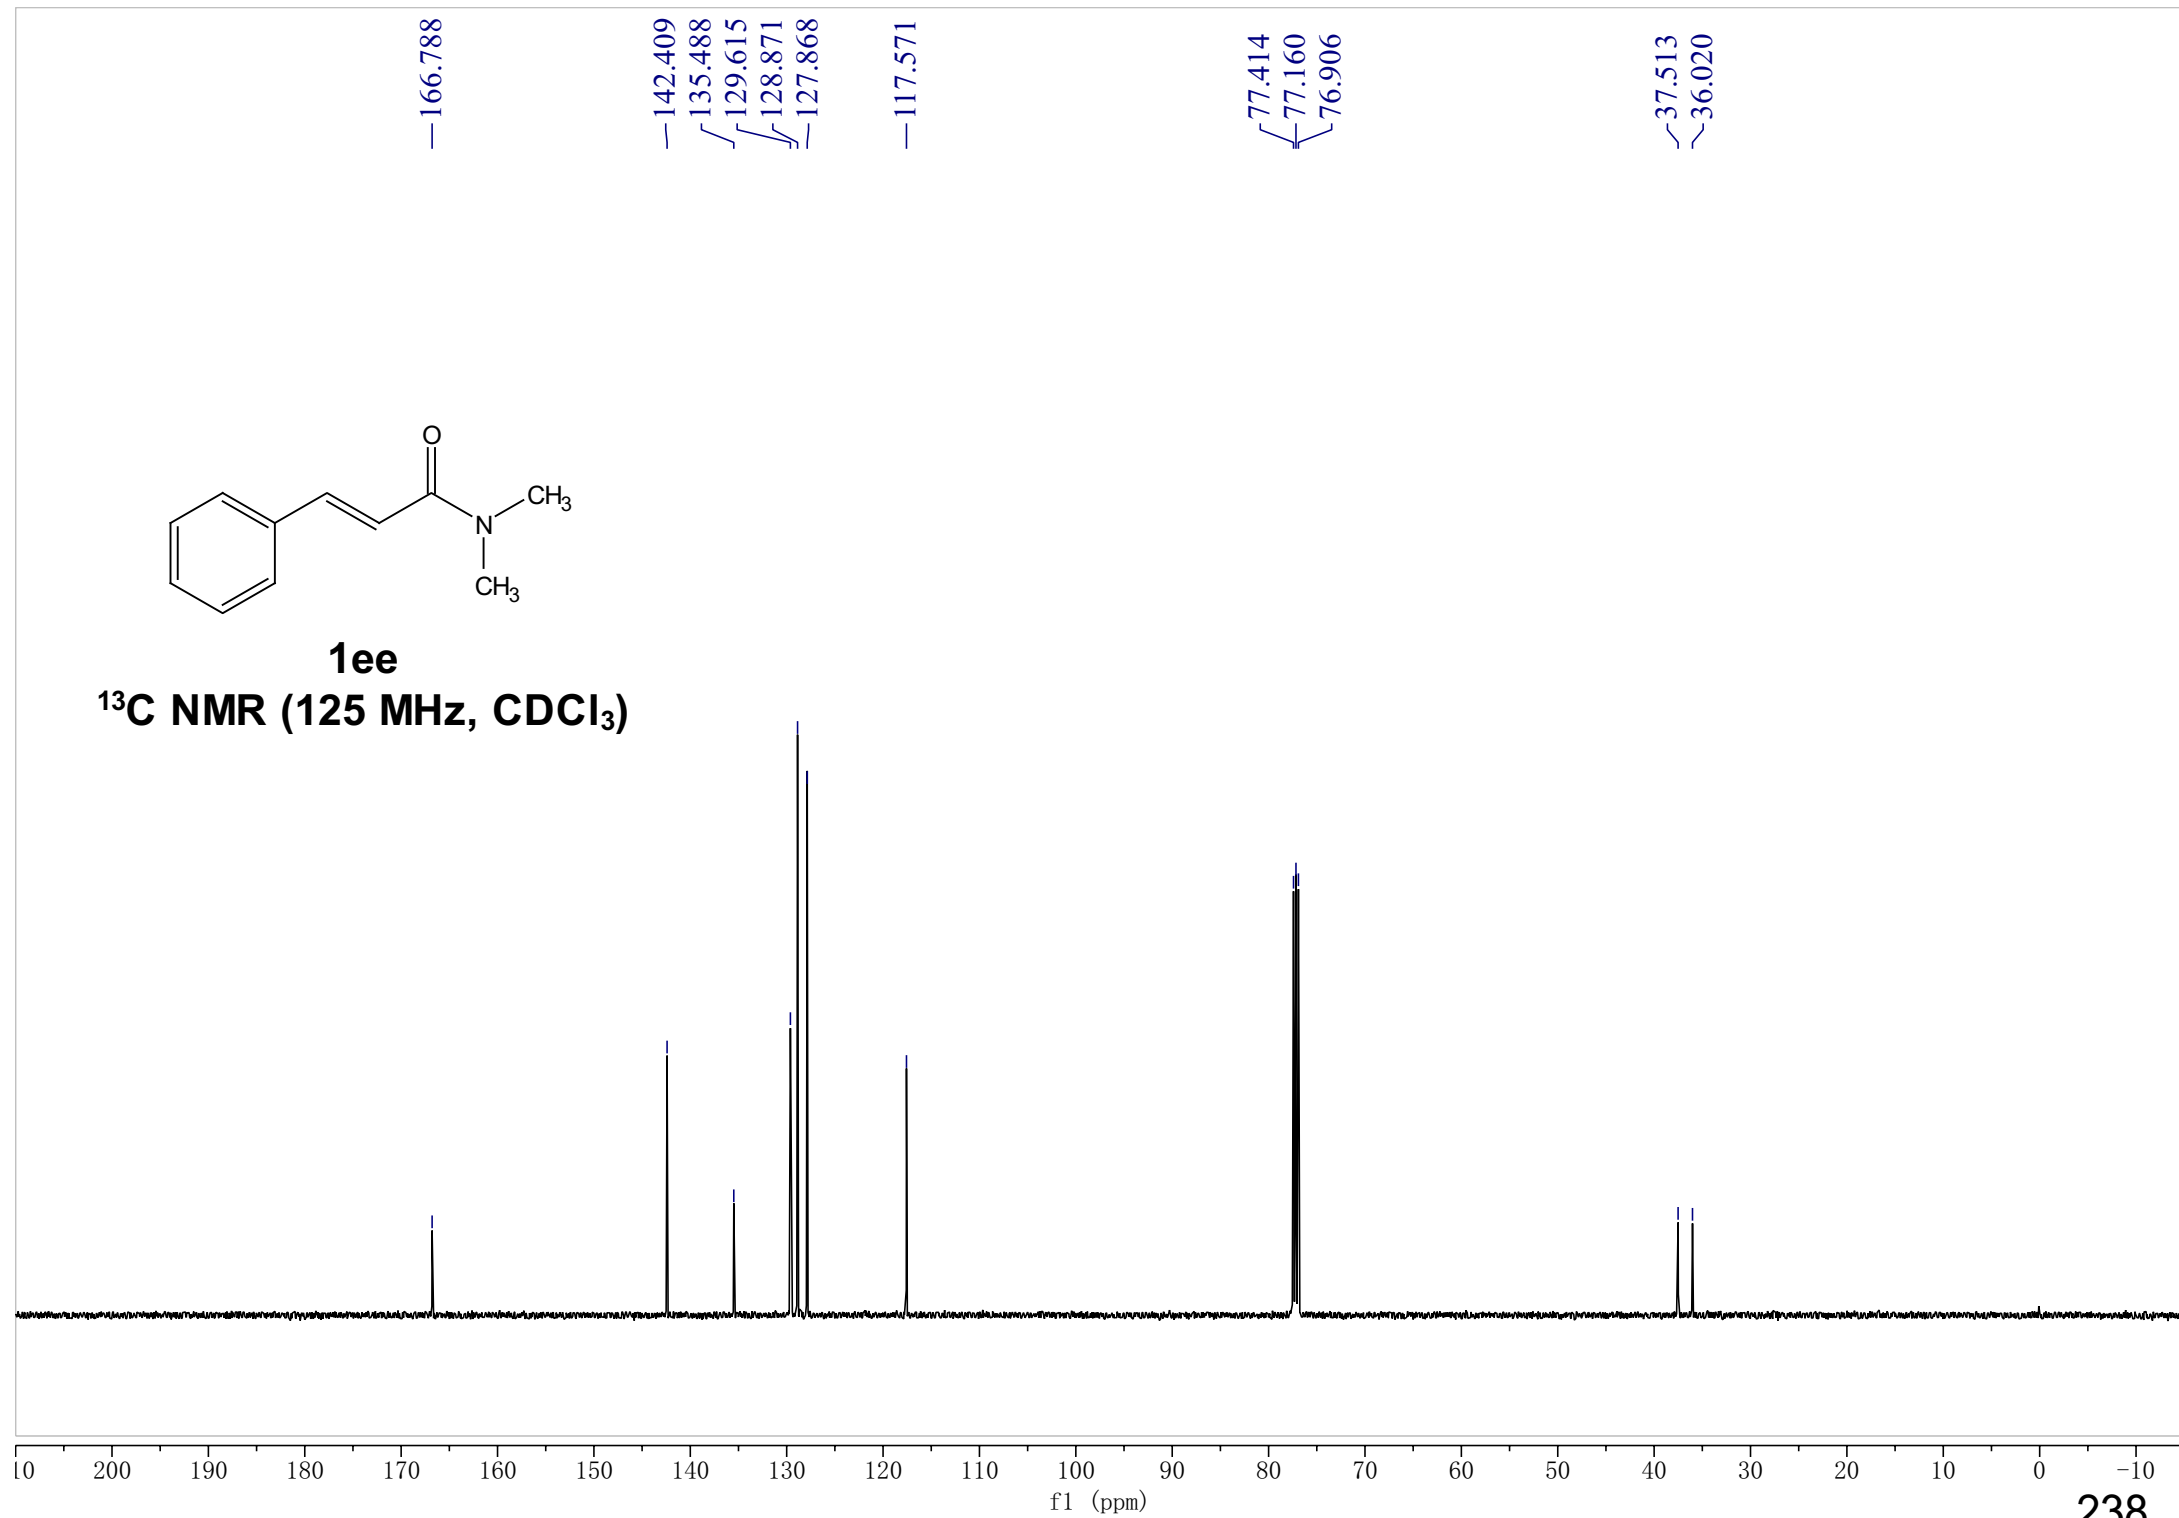

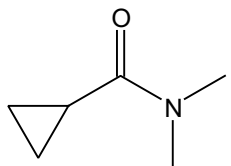

**1tt**

**<sup>1</sup>H NMR (500 MHz, CDCl<sub>3</sub>)**

—7.260 CDCl<sub>3</sub>

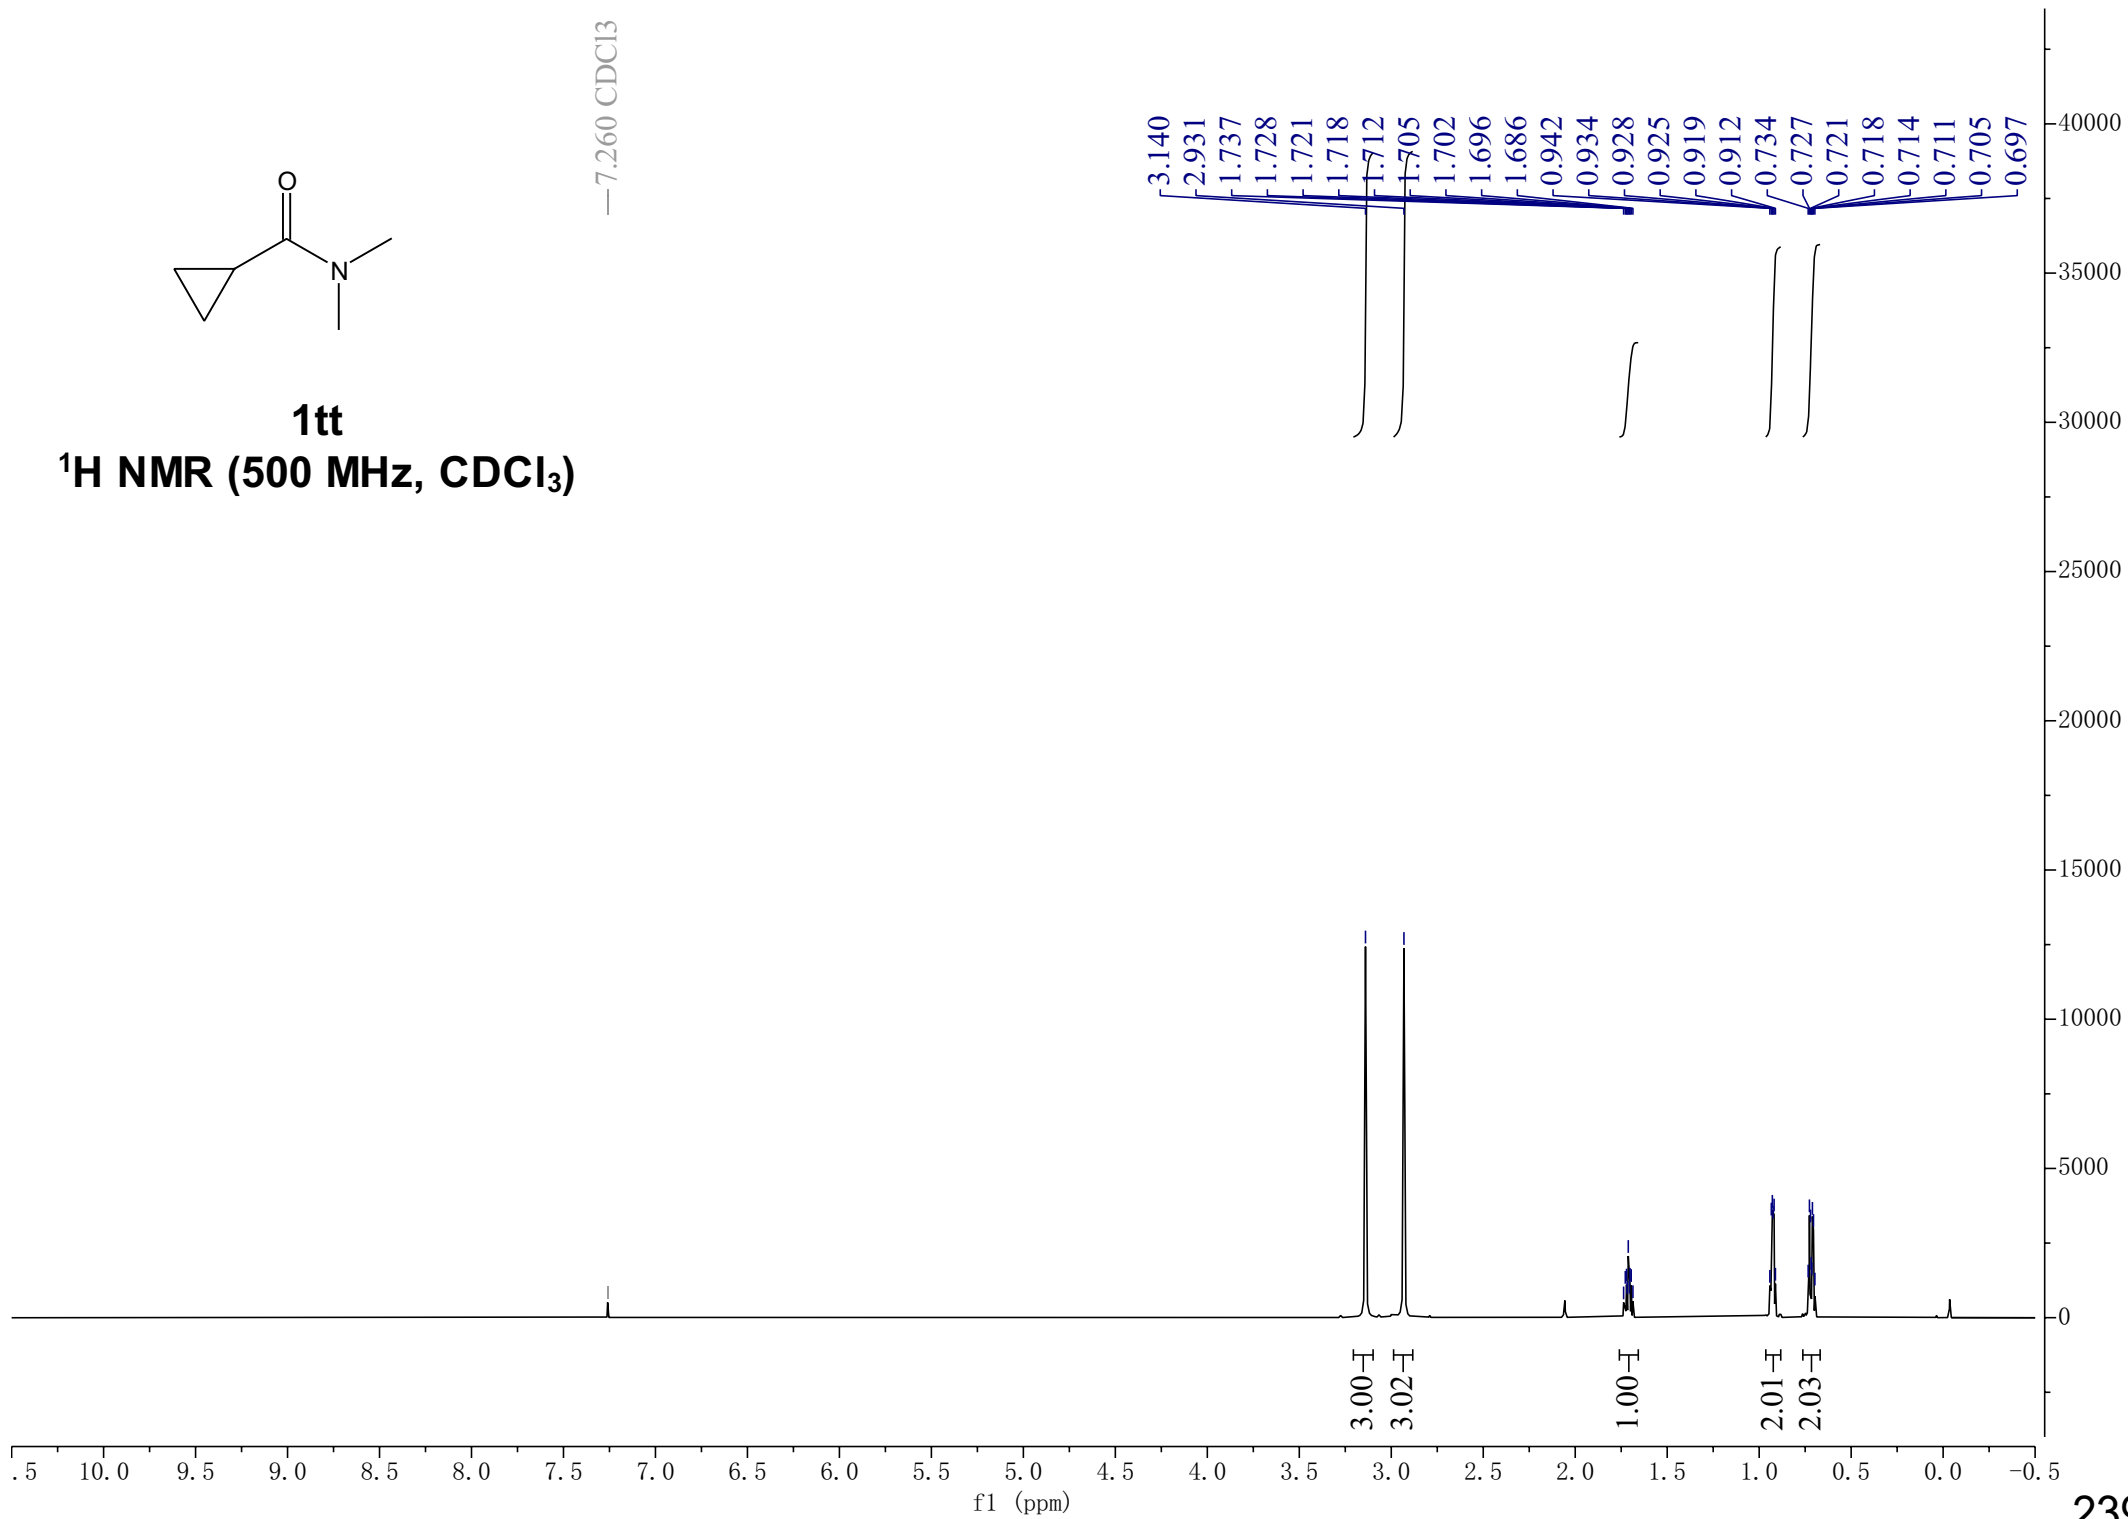



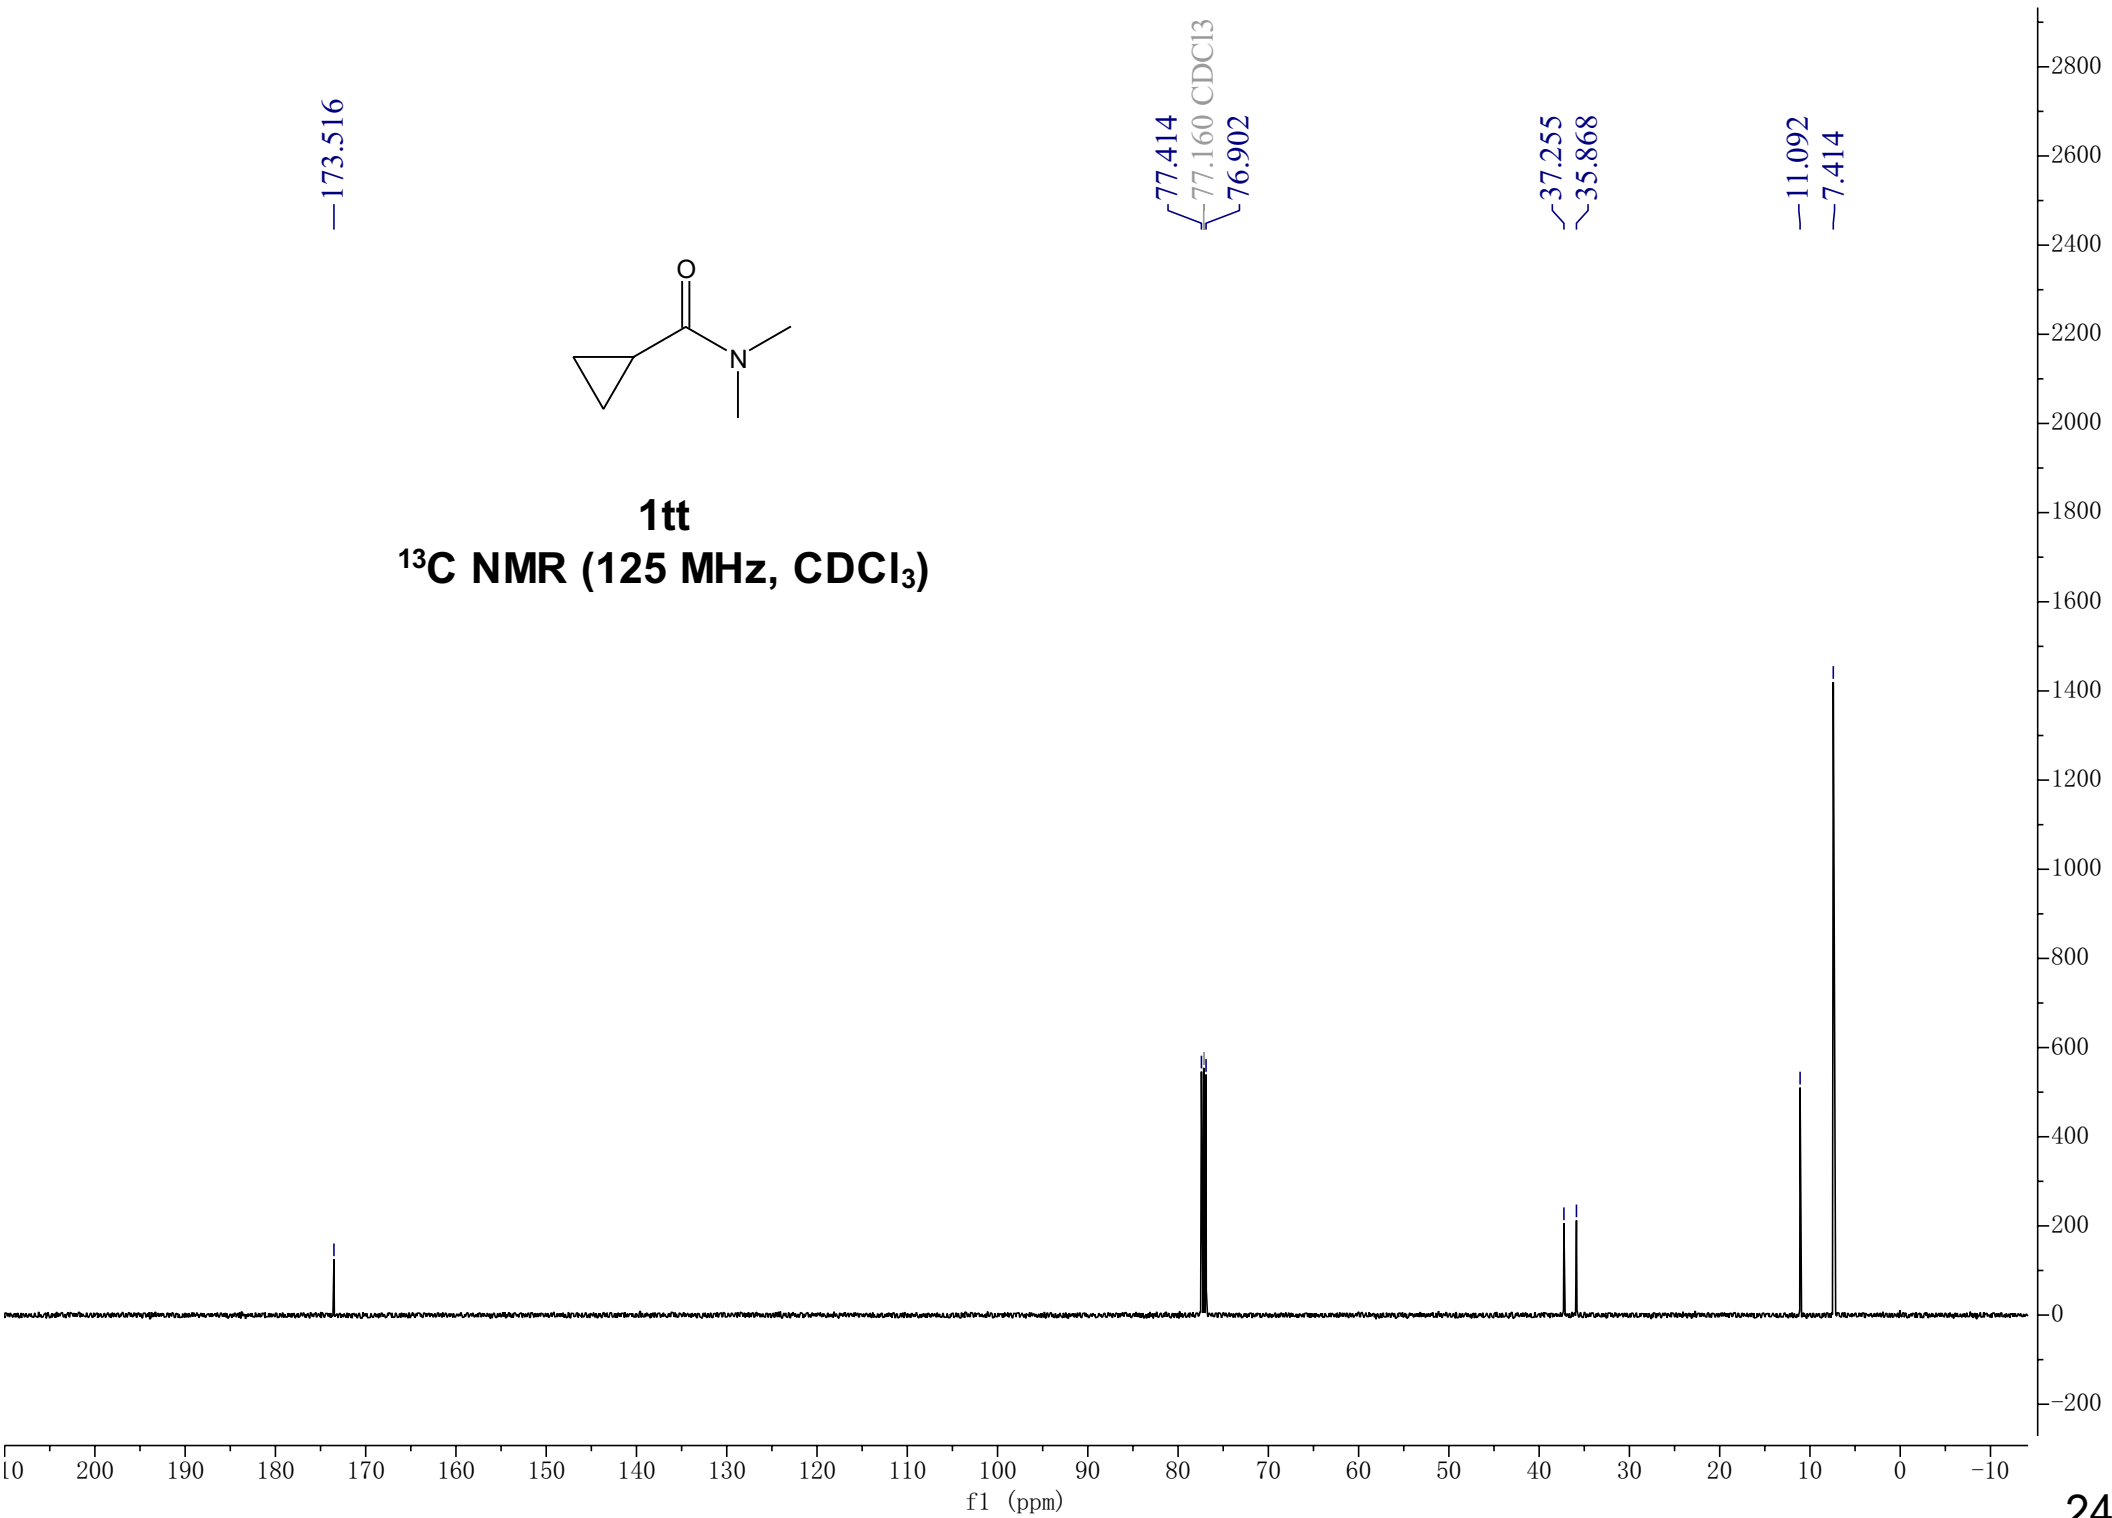

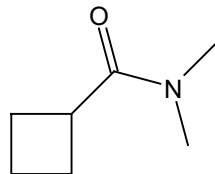

1uu

<sup>1</sup>H NMR (400 MHz, CDCl<sub>3</sub>)

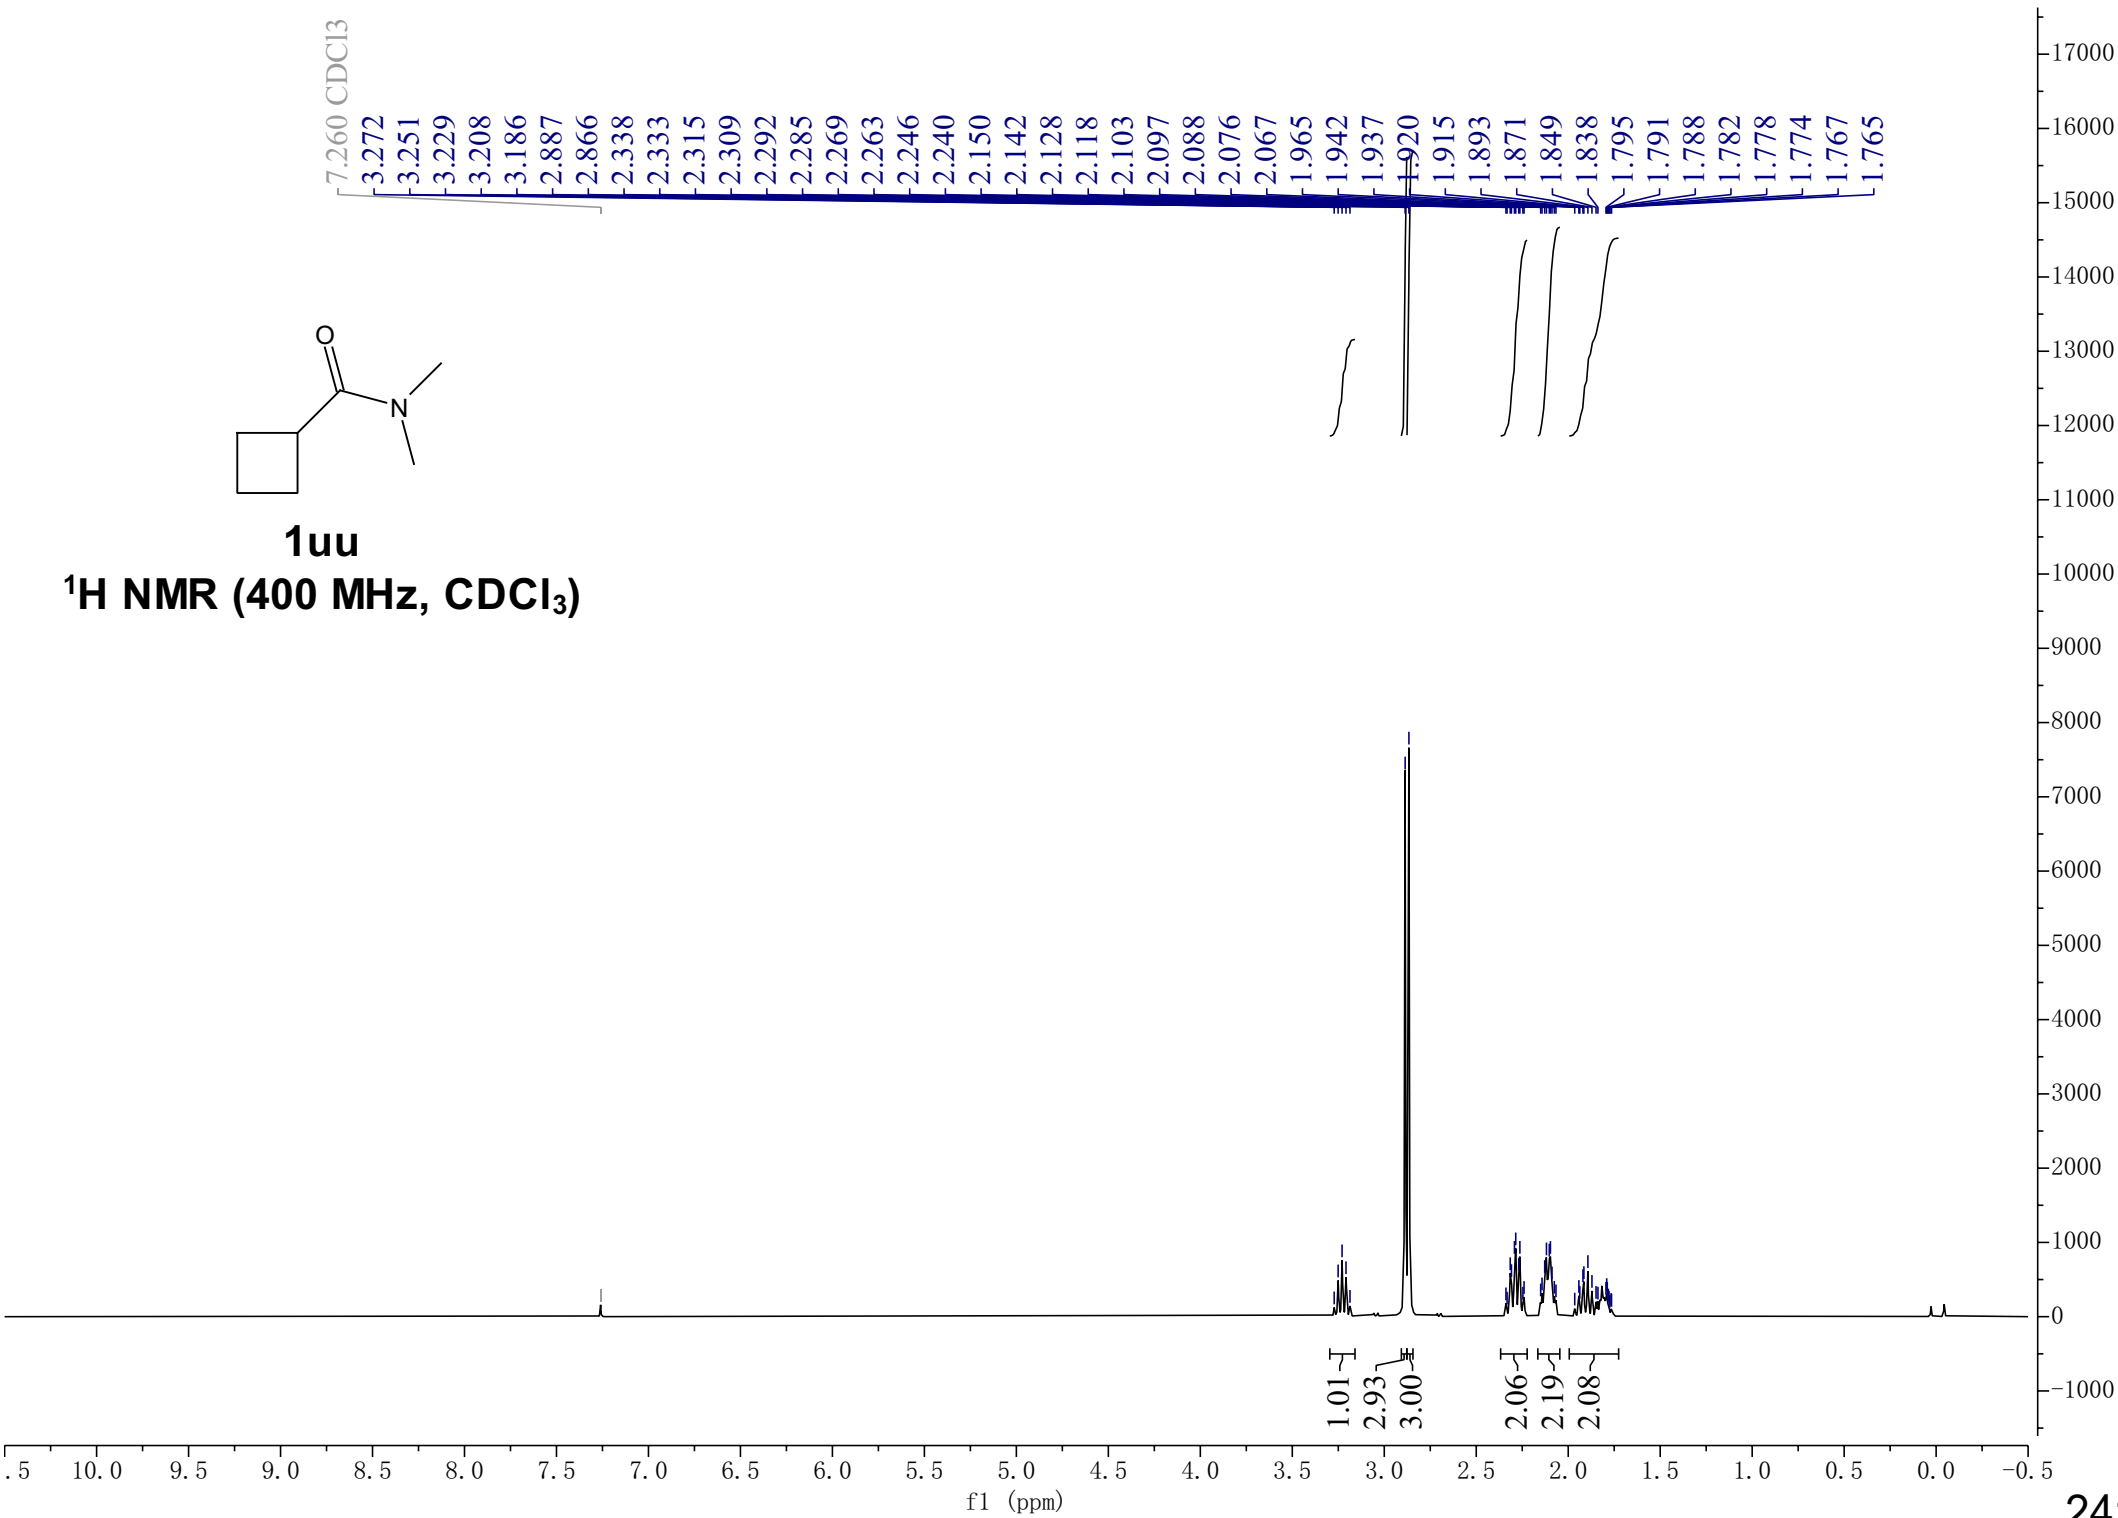

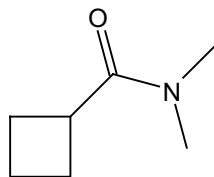

**1uu**

**$^{13}\text{C}$  NMR (100 MHz,  $\text{CDCl}_3$ )**

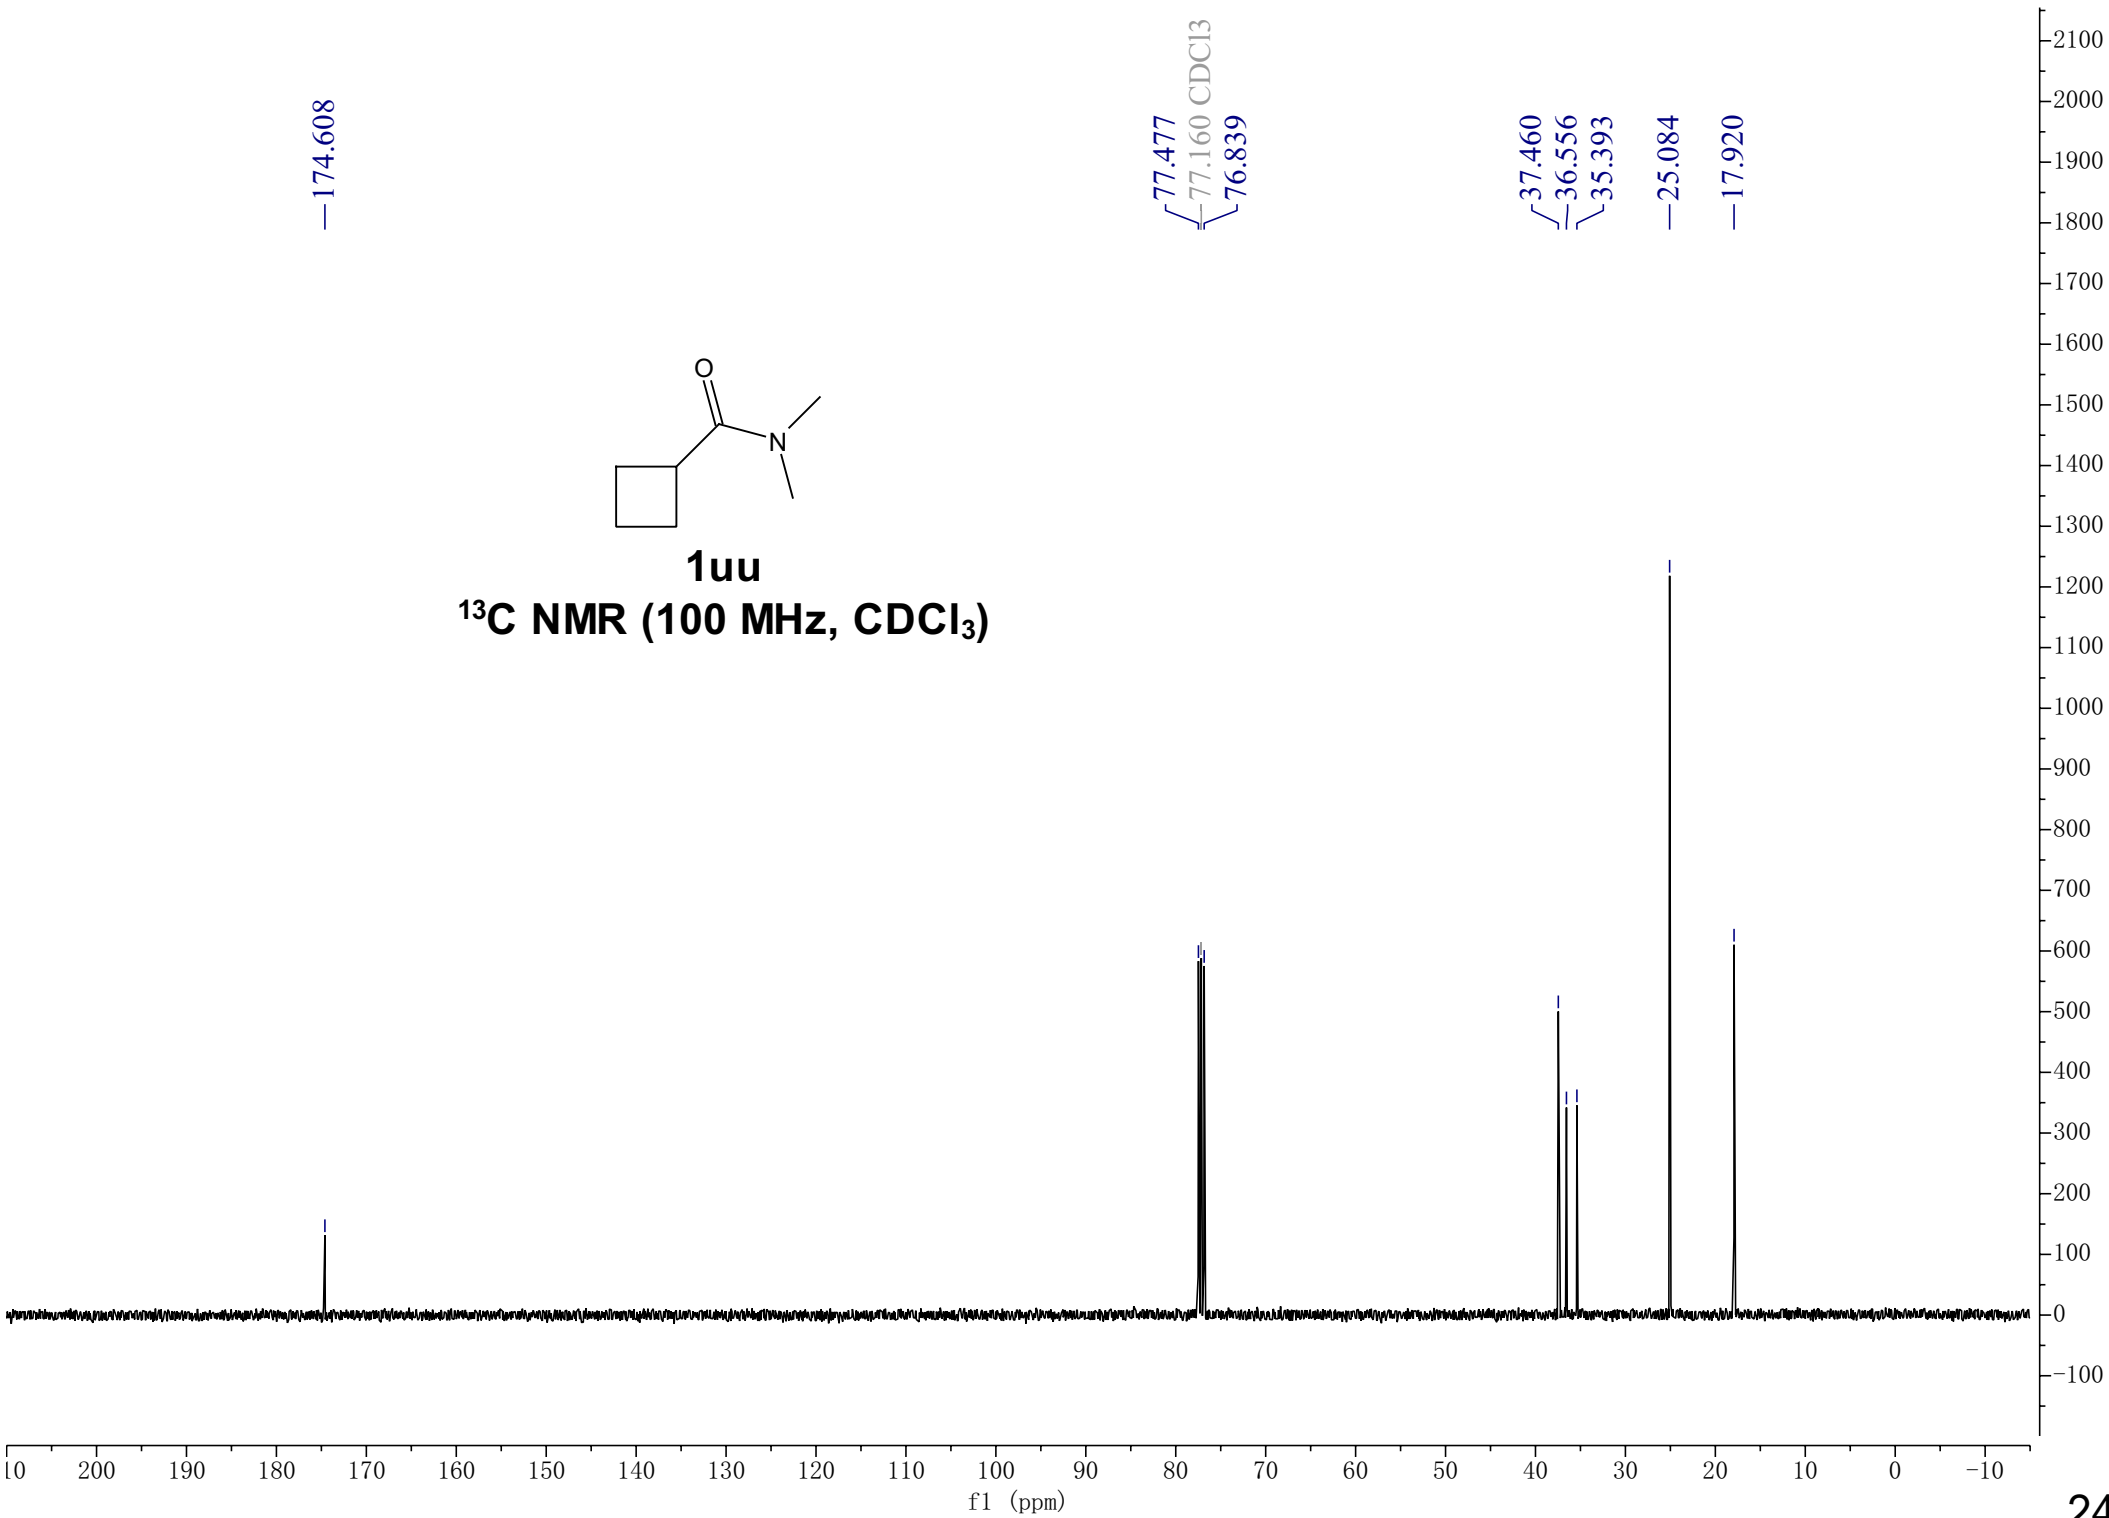

8.082  
8.063  
7.414  
7.392  
7.373  
7.338  
7.319  
7.301  
7.260 CDCl<sub>3</sub>  
7.166  
7.148  
3.571  
3.555  
3.538  
3.146  
3.014  
2.997  
2.980

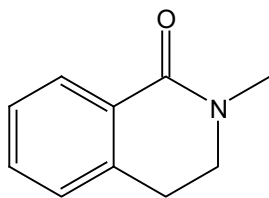

**1ww**  
**<sup>1</sup>H NMR (400 MHz, CDCl<sub>3</sub>)**

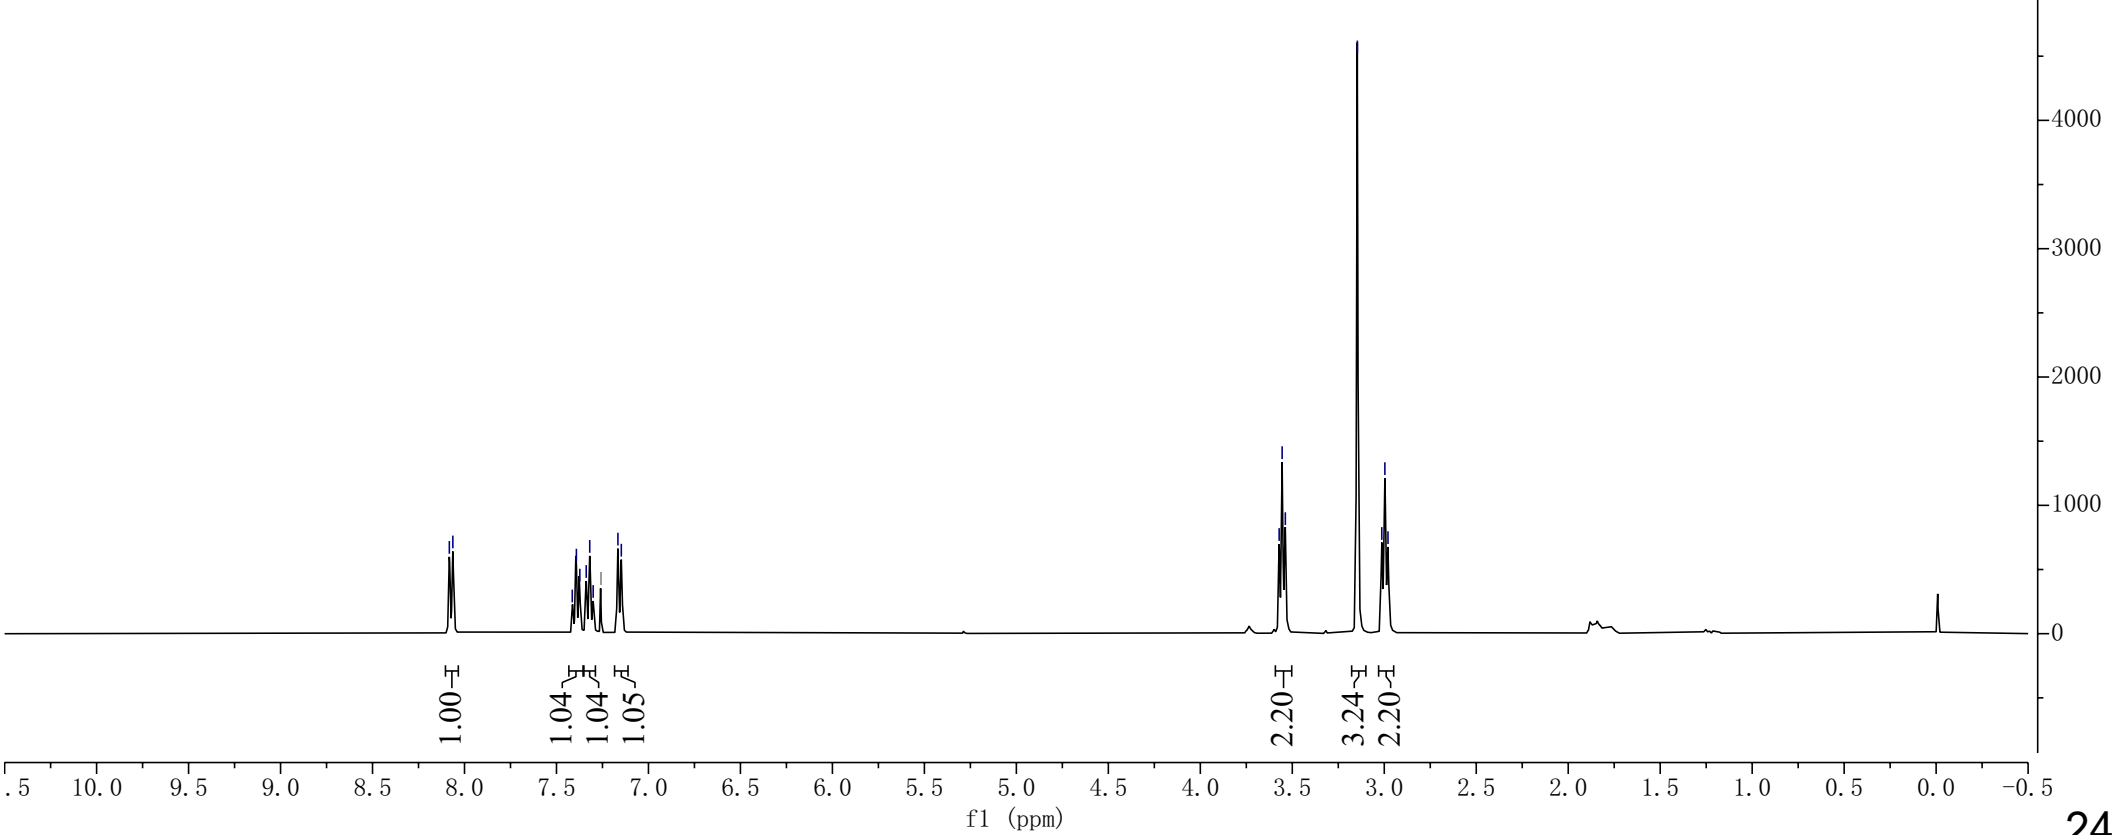

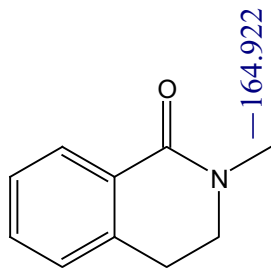

1ww

<sup>13</sup>C NMR (100 MHz, CDCl<sub>3</sub>)

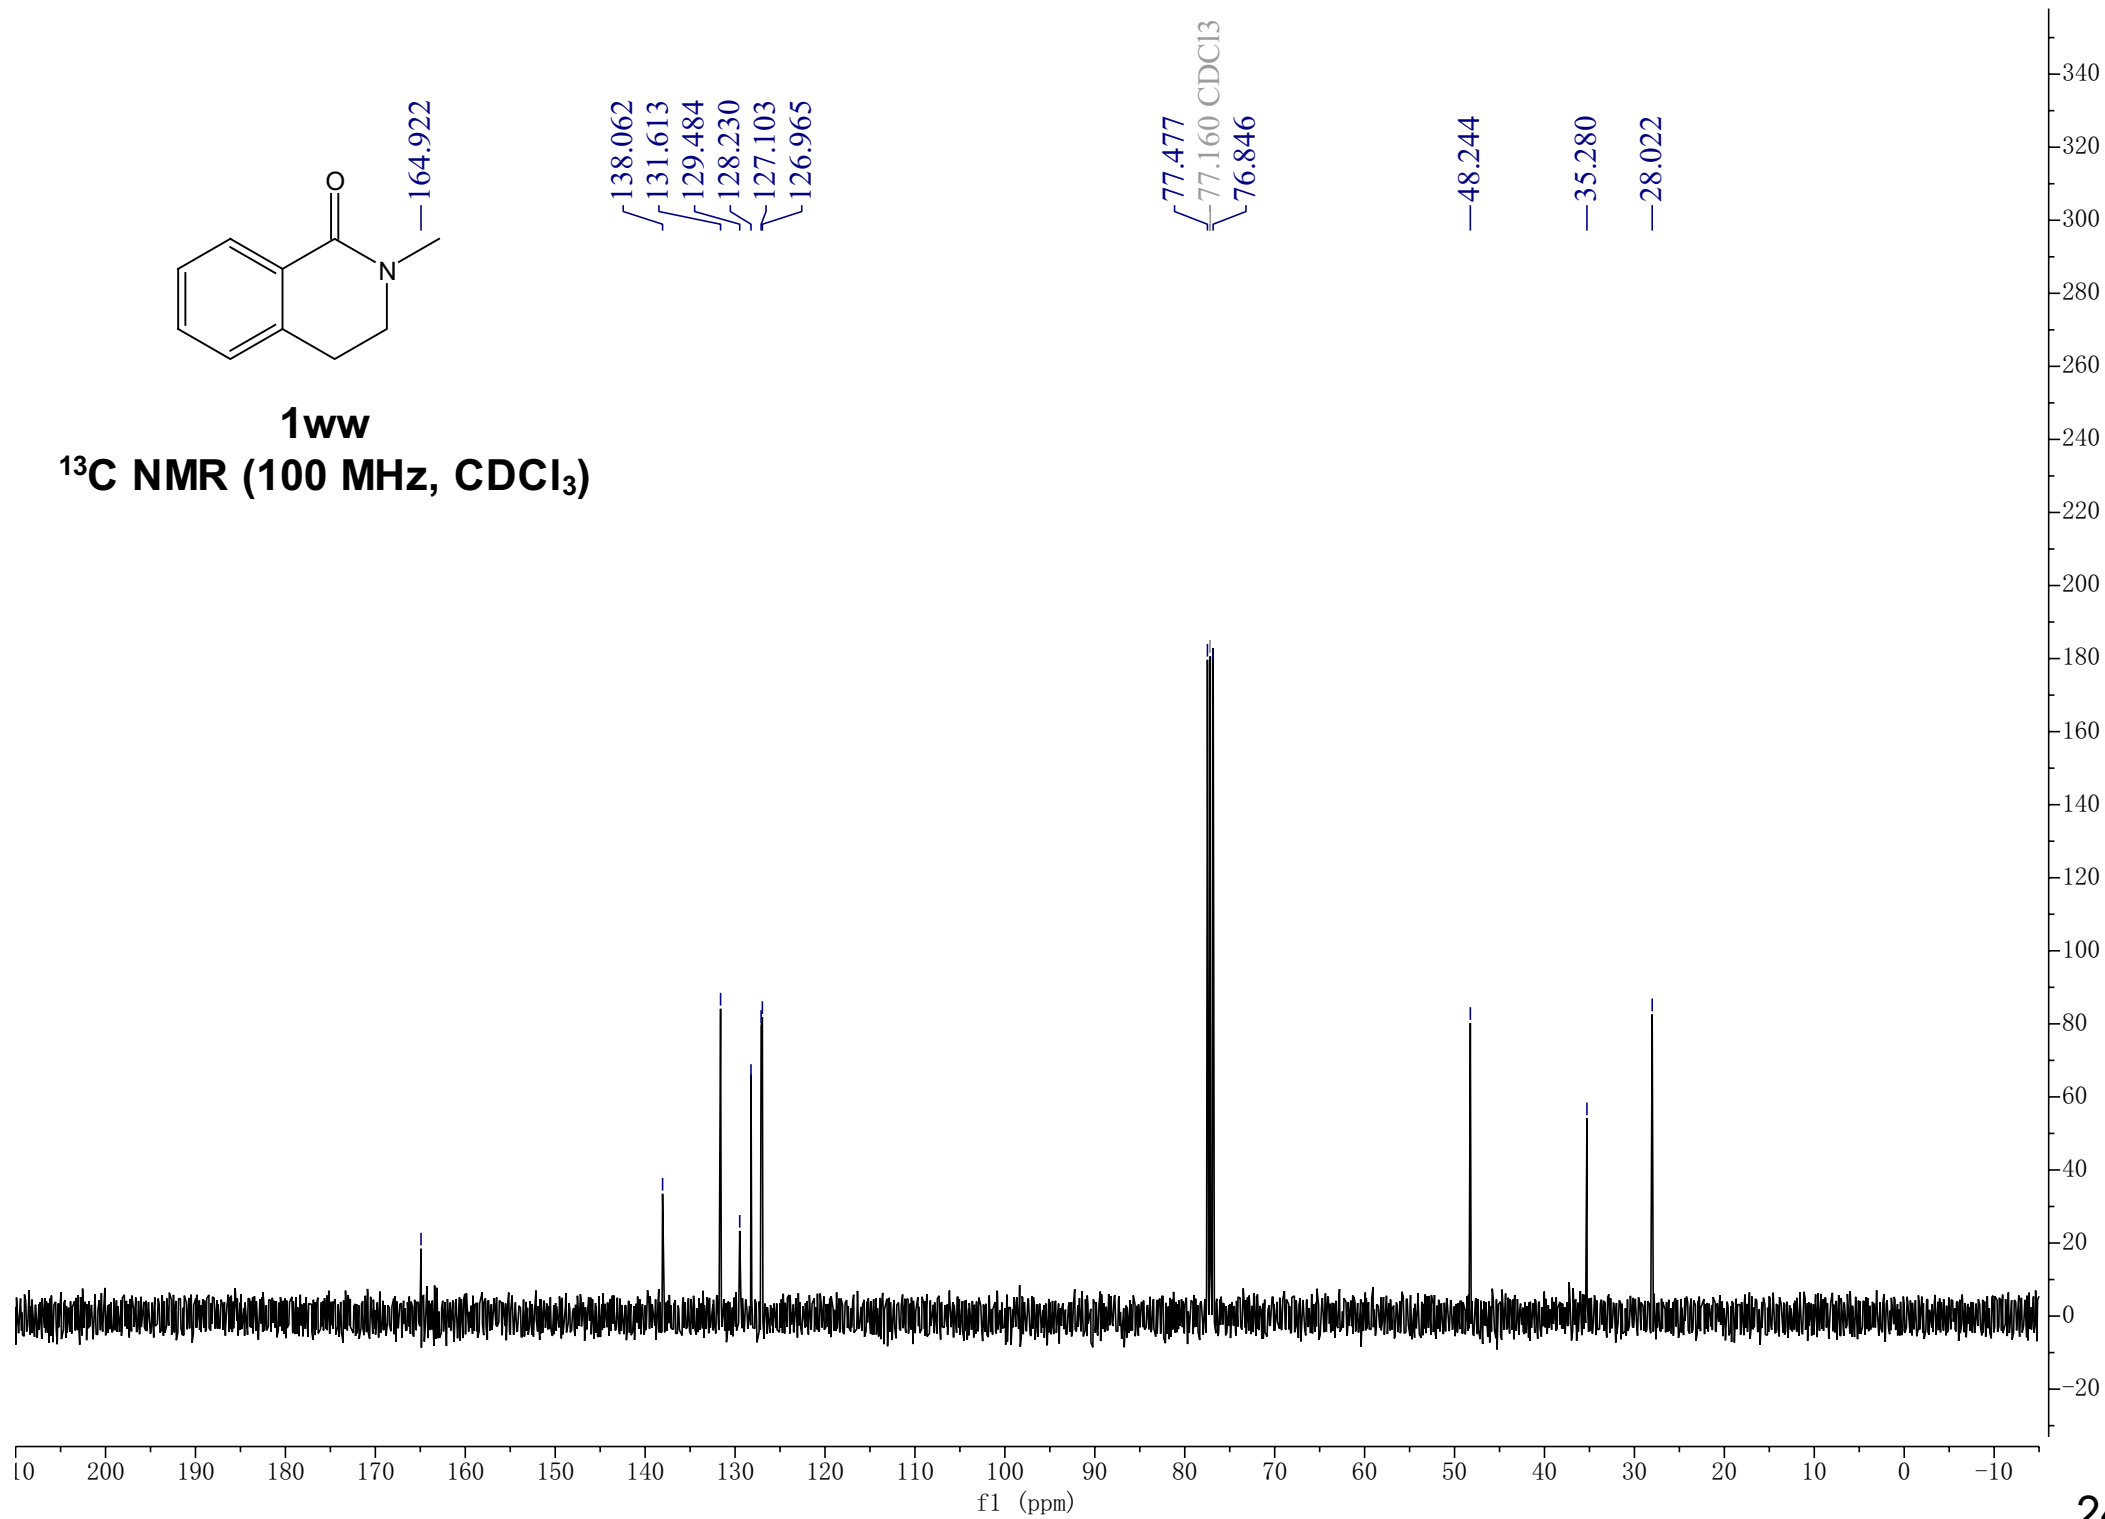

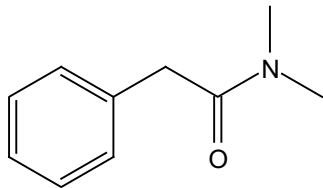

**1xx**

**<sup>1</sup>H NMR (400 MHz, CDCl<sub>3</sub>)**

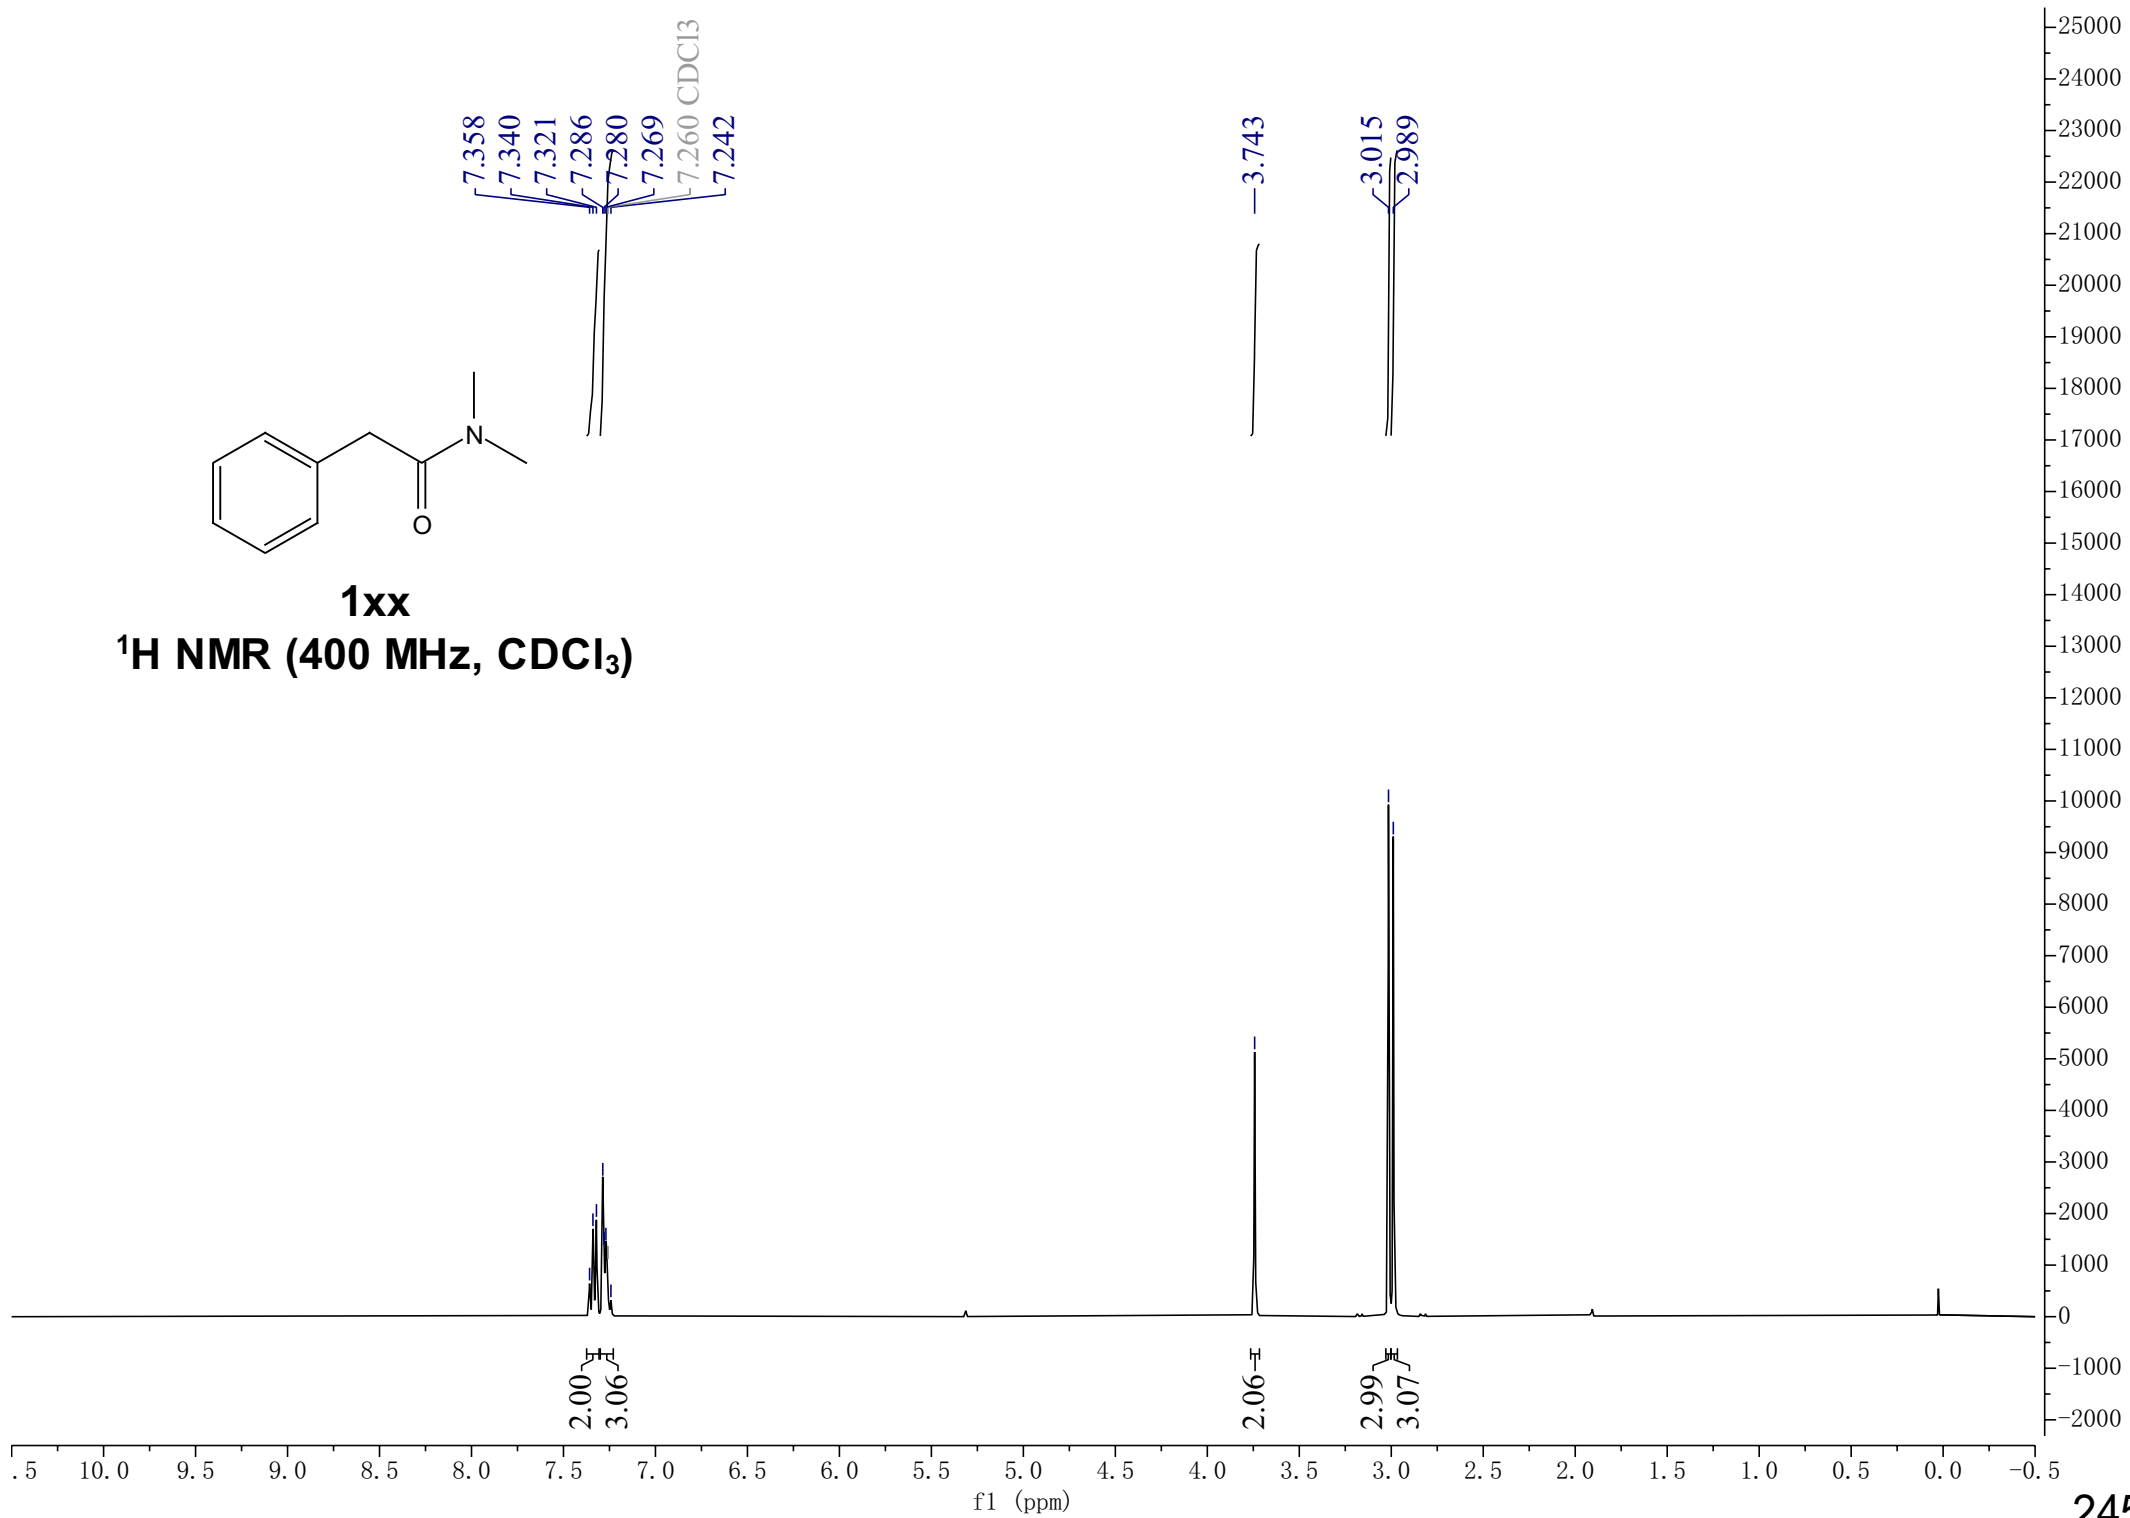

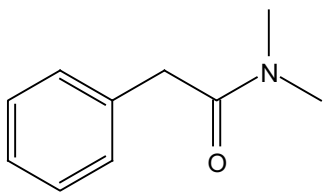

1xx

<sup>13</sup>C NMR (100 MHz, CDCl<sub>3</sub>)

171.123

135.197

128.839

128.737

126.794

77.477  
77.160 CDCl<sub>3</sub>  
76.843

41.135

37.814

35.707

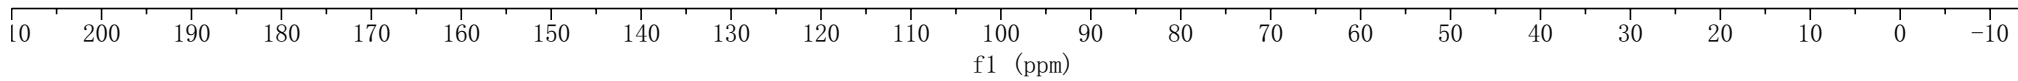

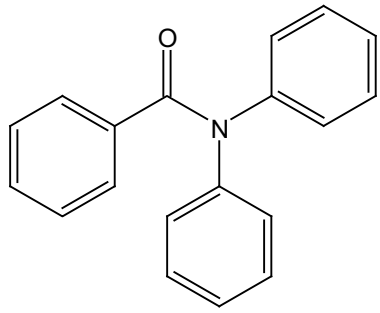

**1zz**

**<sup>1</sup>H NMR (500 MHz, CDCl<sub>3</sub>)**

7.465  
7.450  
7.303  
7.288  
7.273  
7.260  
7.225  
7.210  
7.196  
7.182  
7.163  
7.147

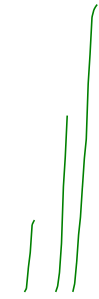

2.00  
4.91  
7.99

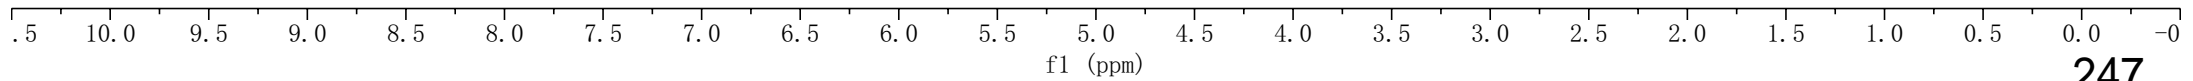



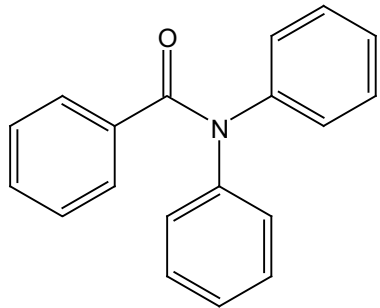

**1zz**  
 **$^{13}\text{C}$  NMR (125 MHz,  $\text{CDCl}_3$ )**

—170.787

—144.052  
—136.241  
—130.301  
—129.306  
—129.239  
—127.995  
—127.633  
—126.481

—77.415  
—77.160  
—76.907

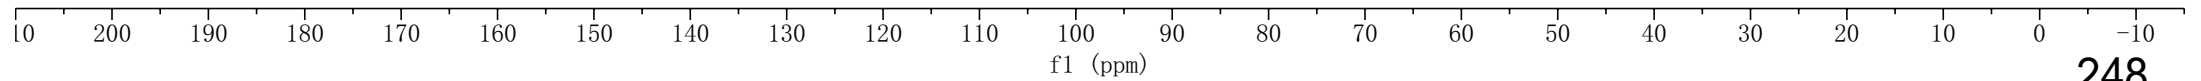

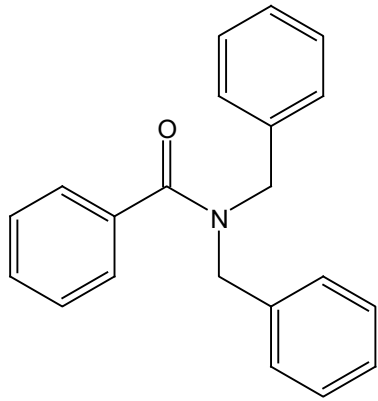

**1aaa**

**<sup>1</sup>H NMR (500 MHz, CDCl<sub>3</sub>)**

7.518  
7.513  
7.508  
7.504  
7.498  
7.395  
7.392  
7.381  
7.365  
7.351  
7.323  
7.309  
7.295  
7.260  
7.156  
7.142

4.715  
4.411

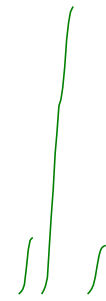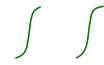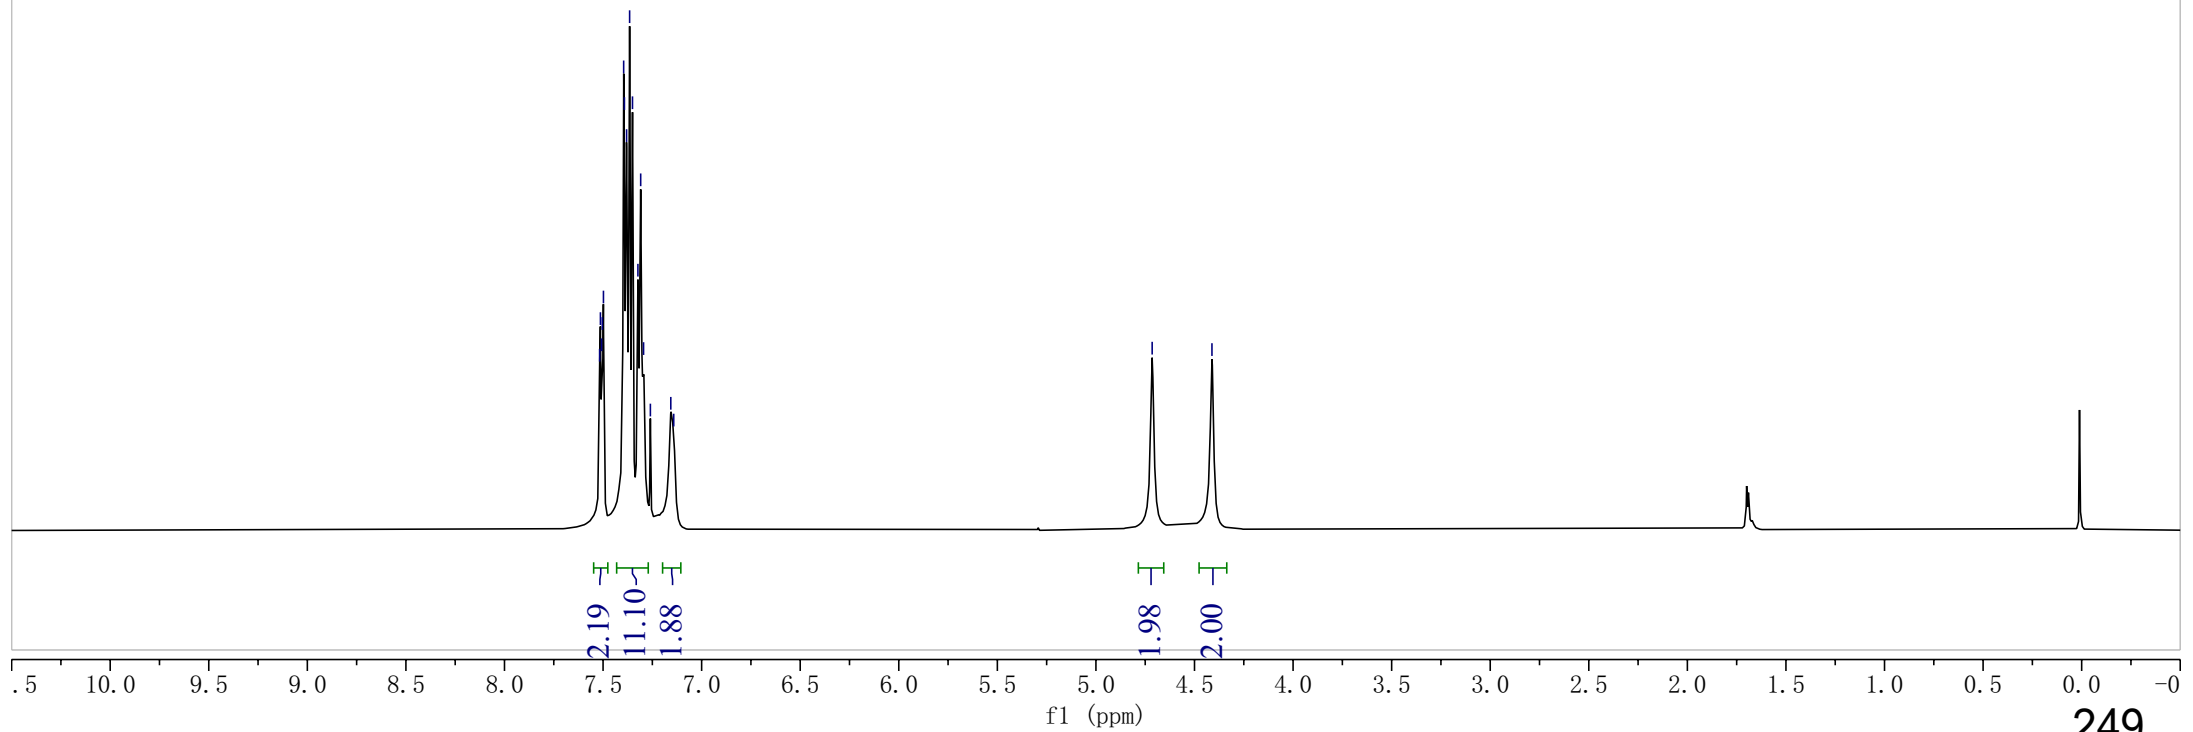



1aaa

<sup>13</sup>C NMR (125 MHz, CDCl<sub>3</sub>)

—172.383

—137.076

—136.565

—136.291

—129.775

—128.977

—128.837

—128.680

—128.548

—127.782

—127.654

—127.164

—126.839

—77.415

—77.161

—76.907

—51.656

—46.969

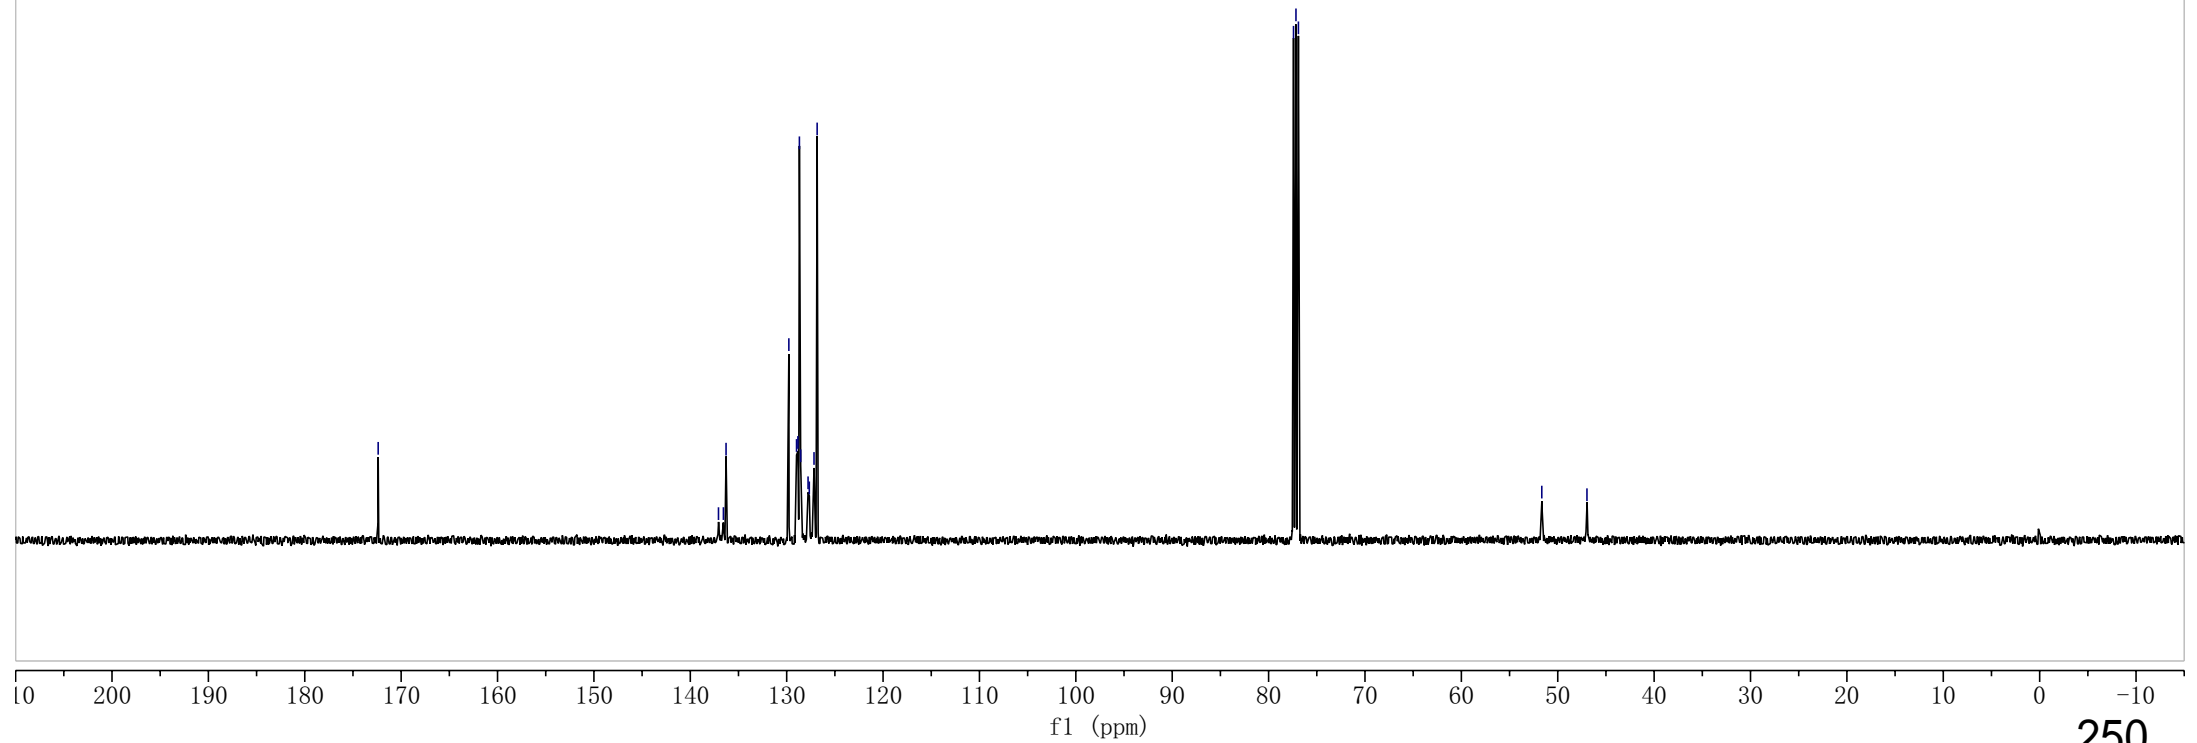

8.268  
8.250  
7.582  
7.565  
7.260

3.127  
2.950

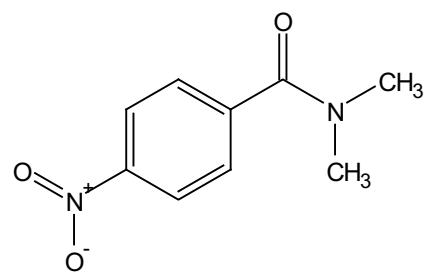

**1bb**  
**<sup>1</sup>H NMR (500 MHz, CDCl<sub>3</sub>)**

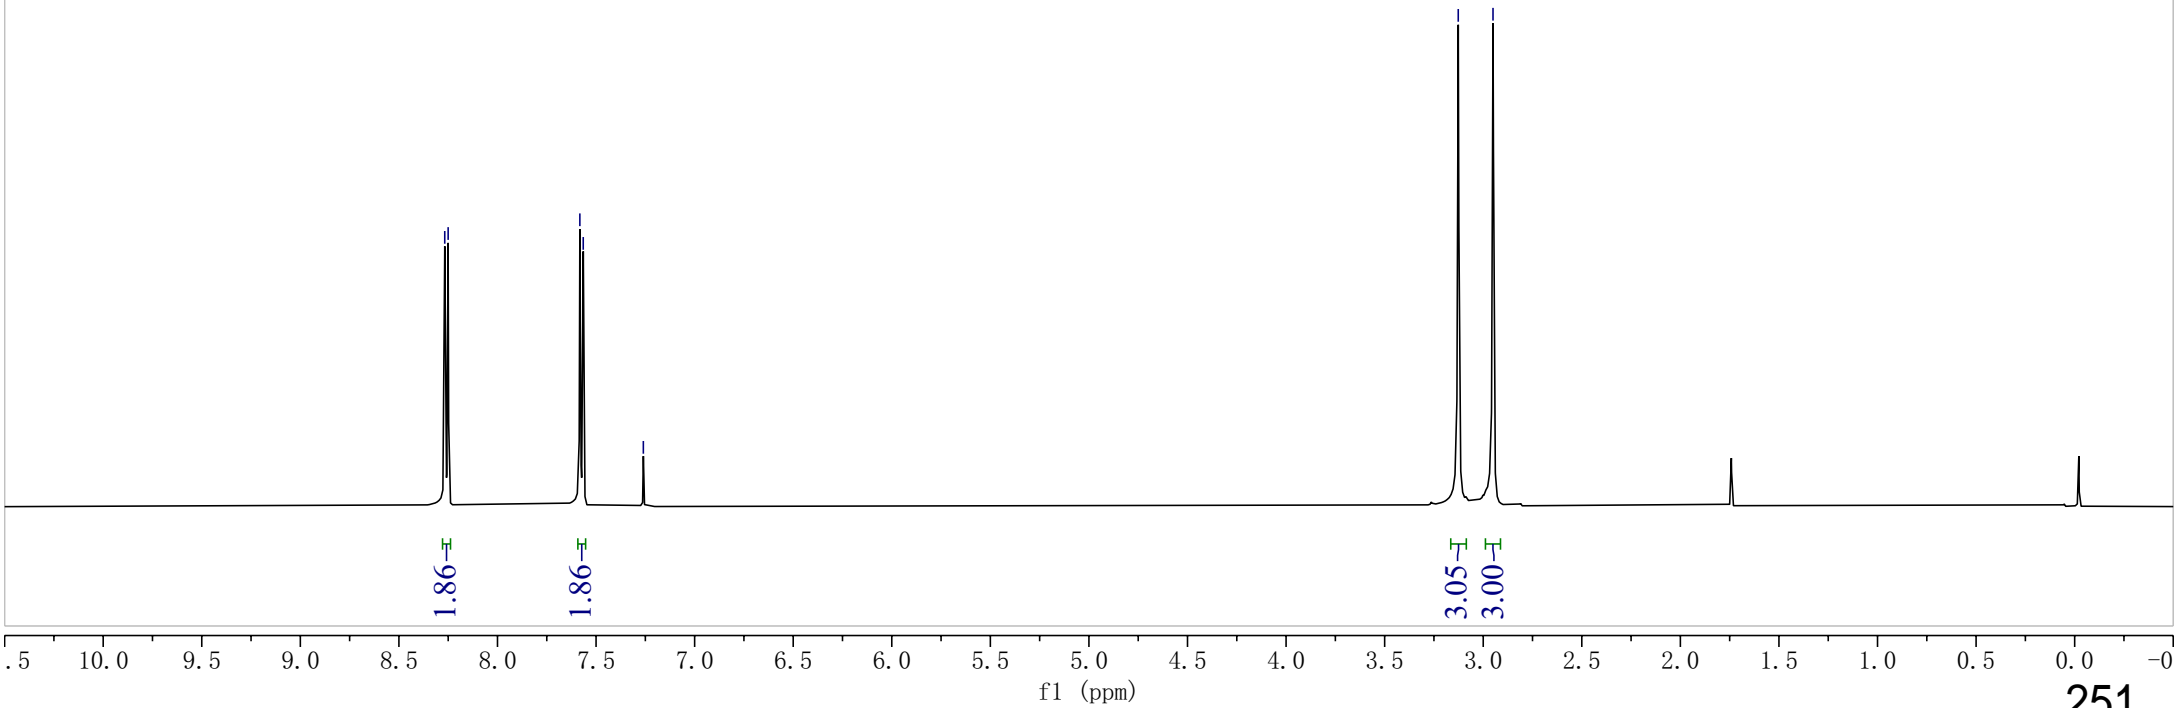

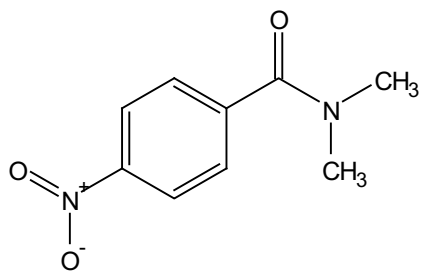

**1bb**

**$^{13}\text{C}$  NMR (125 MHz,  $\text{CDCl}_3$ )**

—169.349

—148.377

—142.618

—128.169

—123.883

77.414

77.161

76.906

—39.408

—35.451

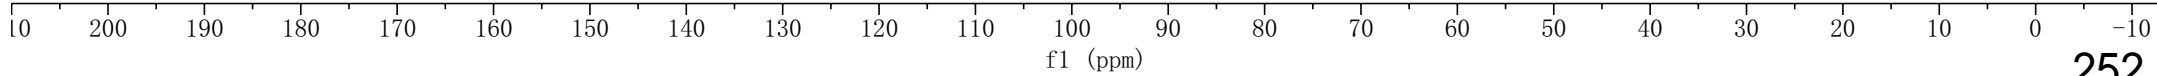

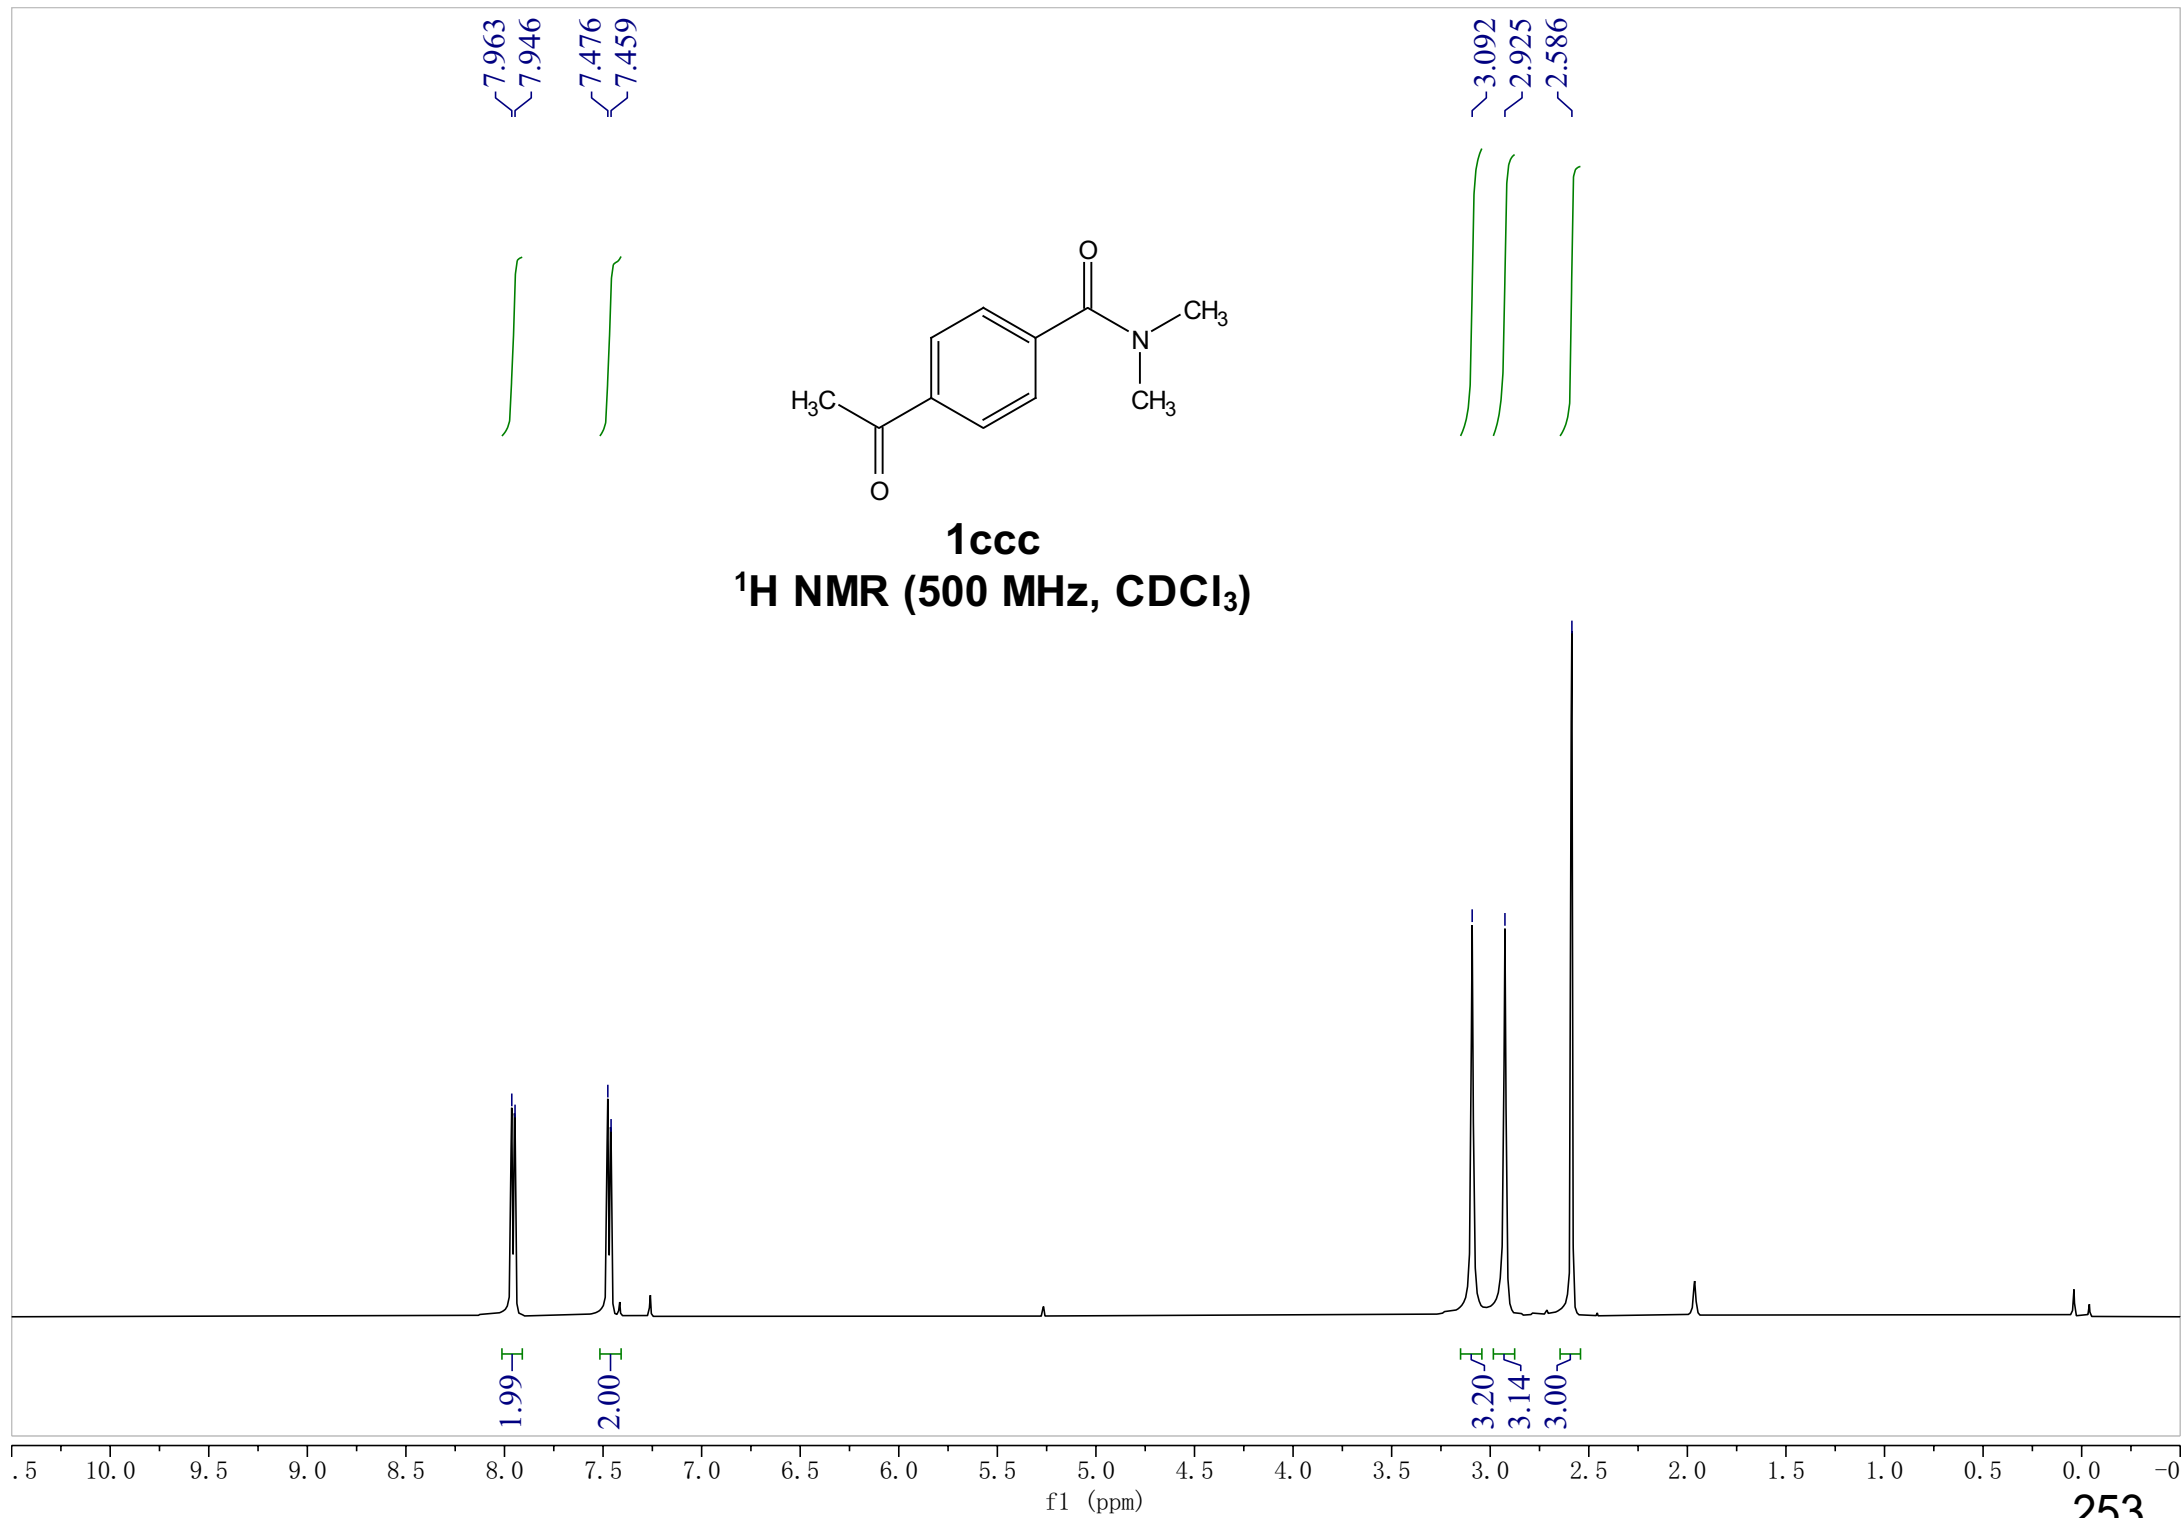

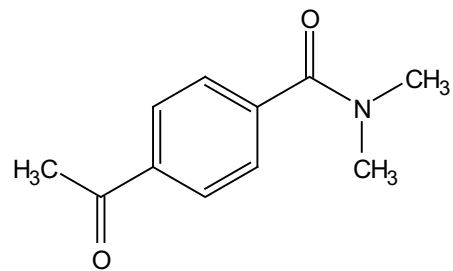

**1ccc**  
**<sup>13</sup>C NMR (125 MHz, CDCl<sub>3</sub>)**

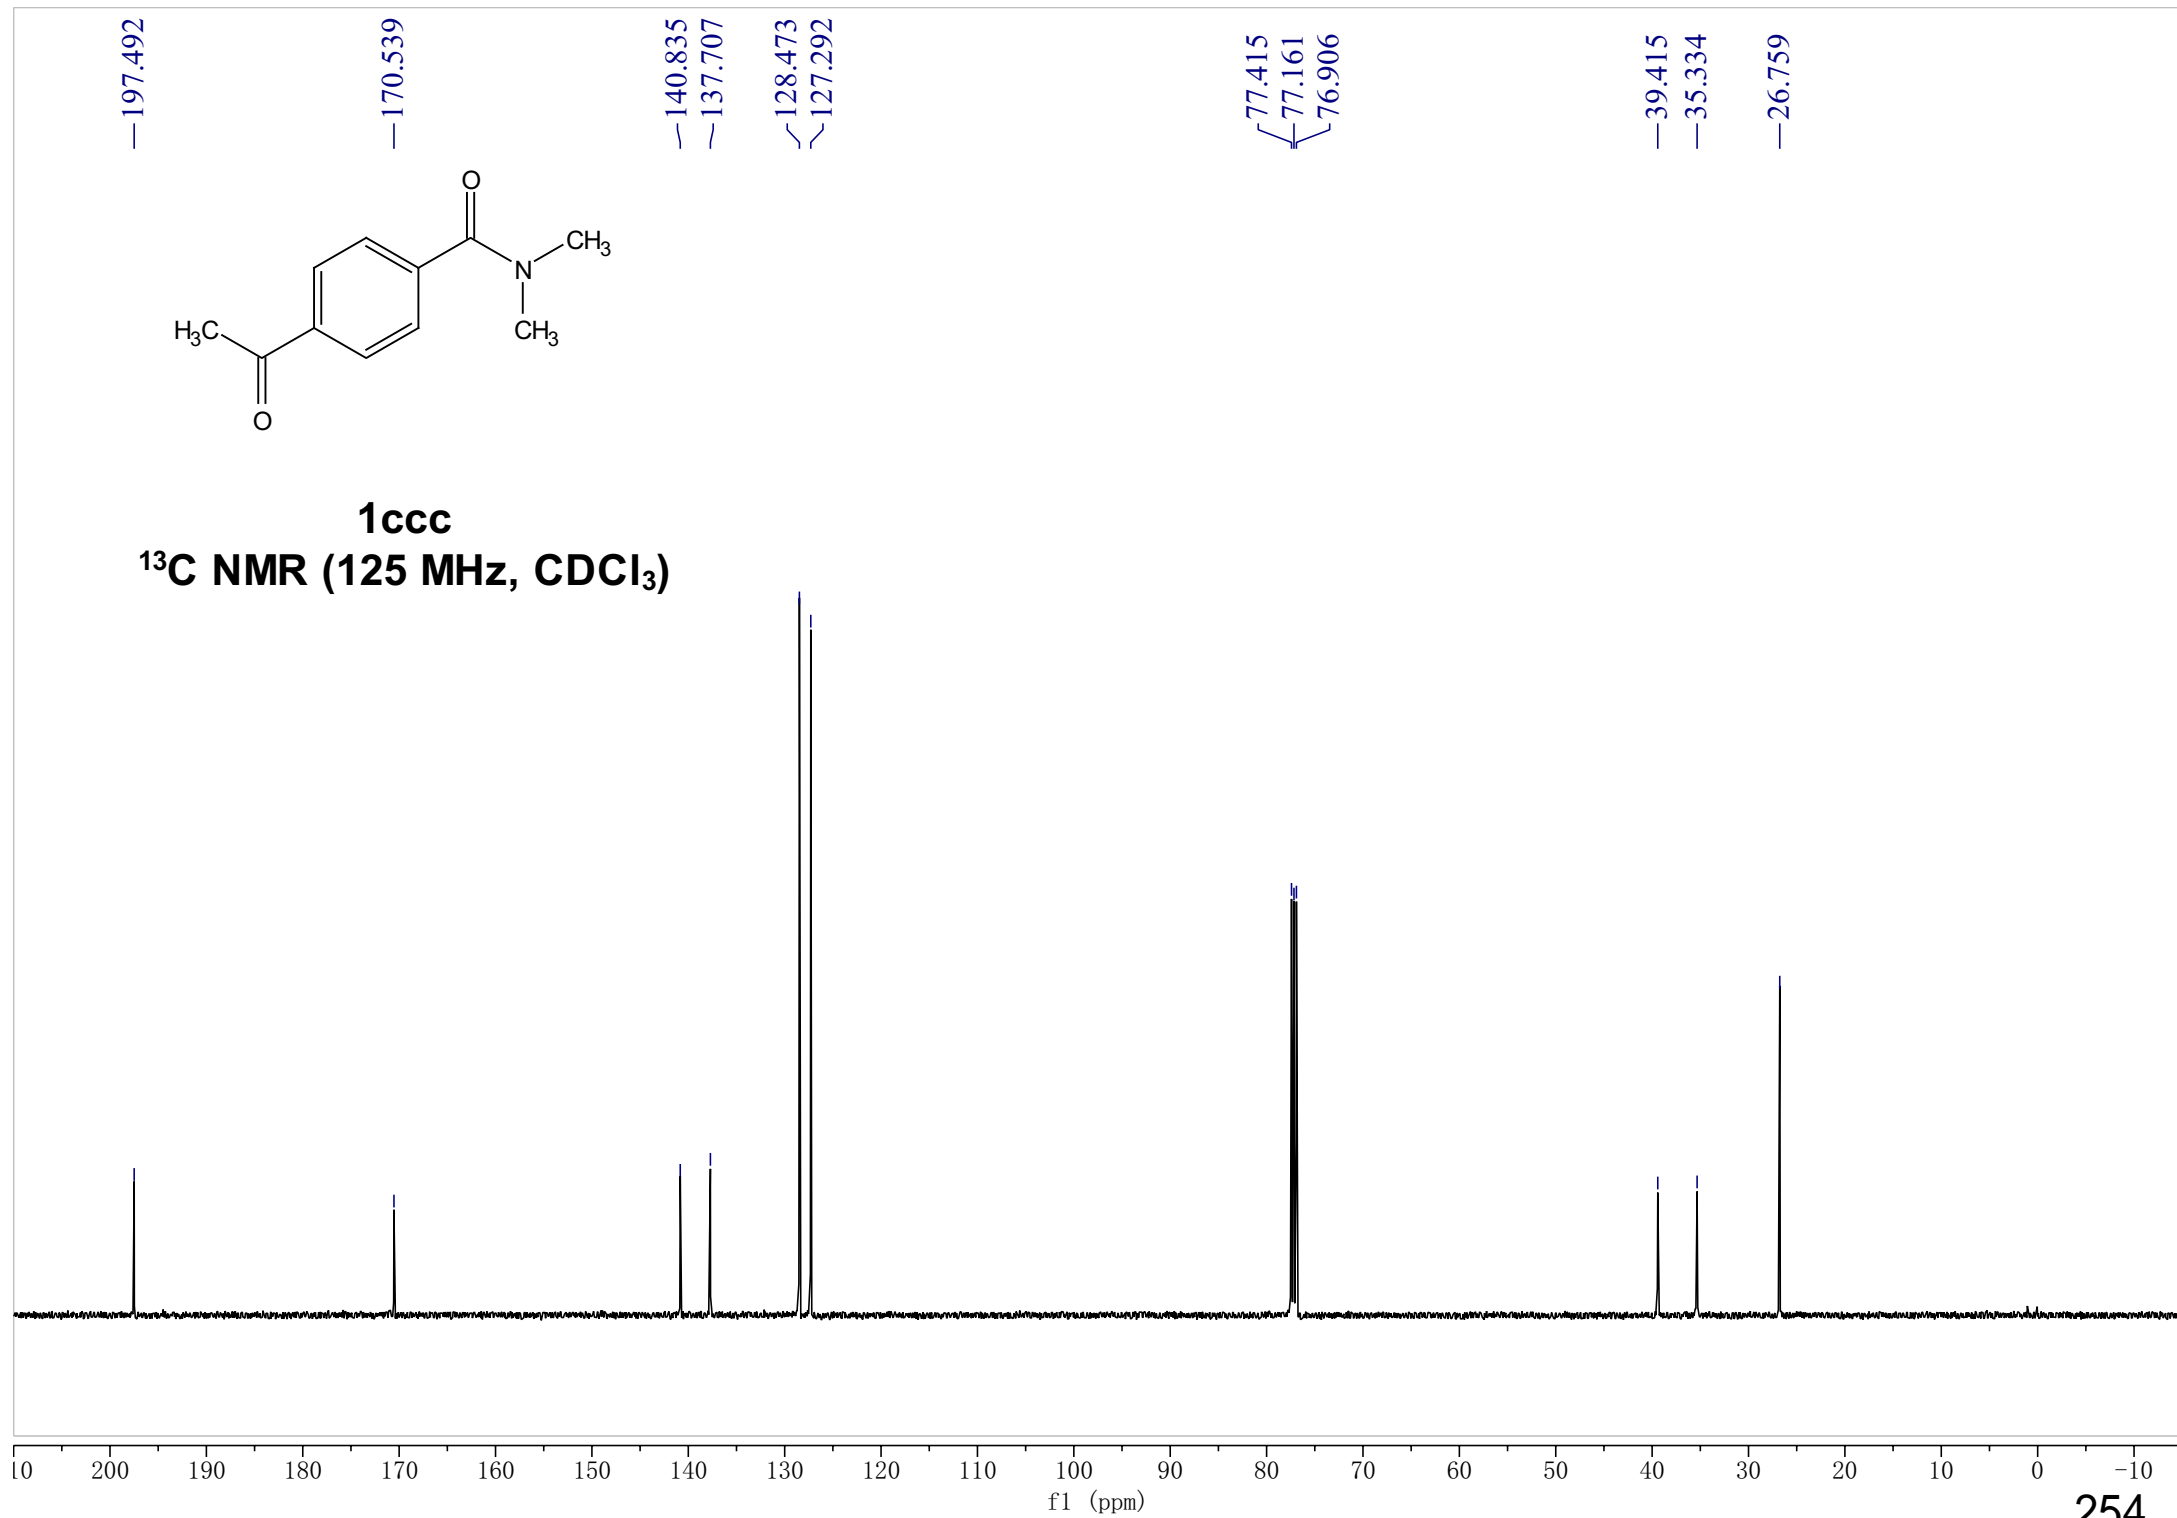

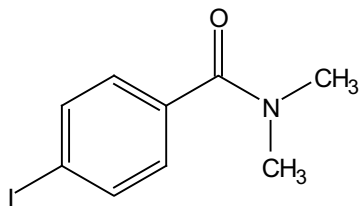

1ddd

<sup>1</sup>H NMR (500 MHz, CDCl<sub>3</sub>)

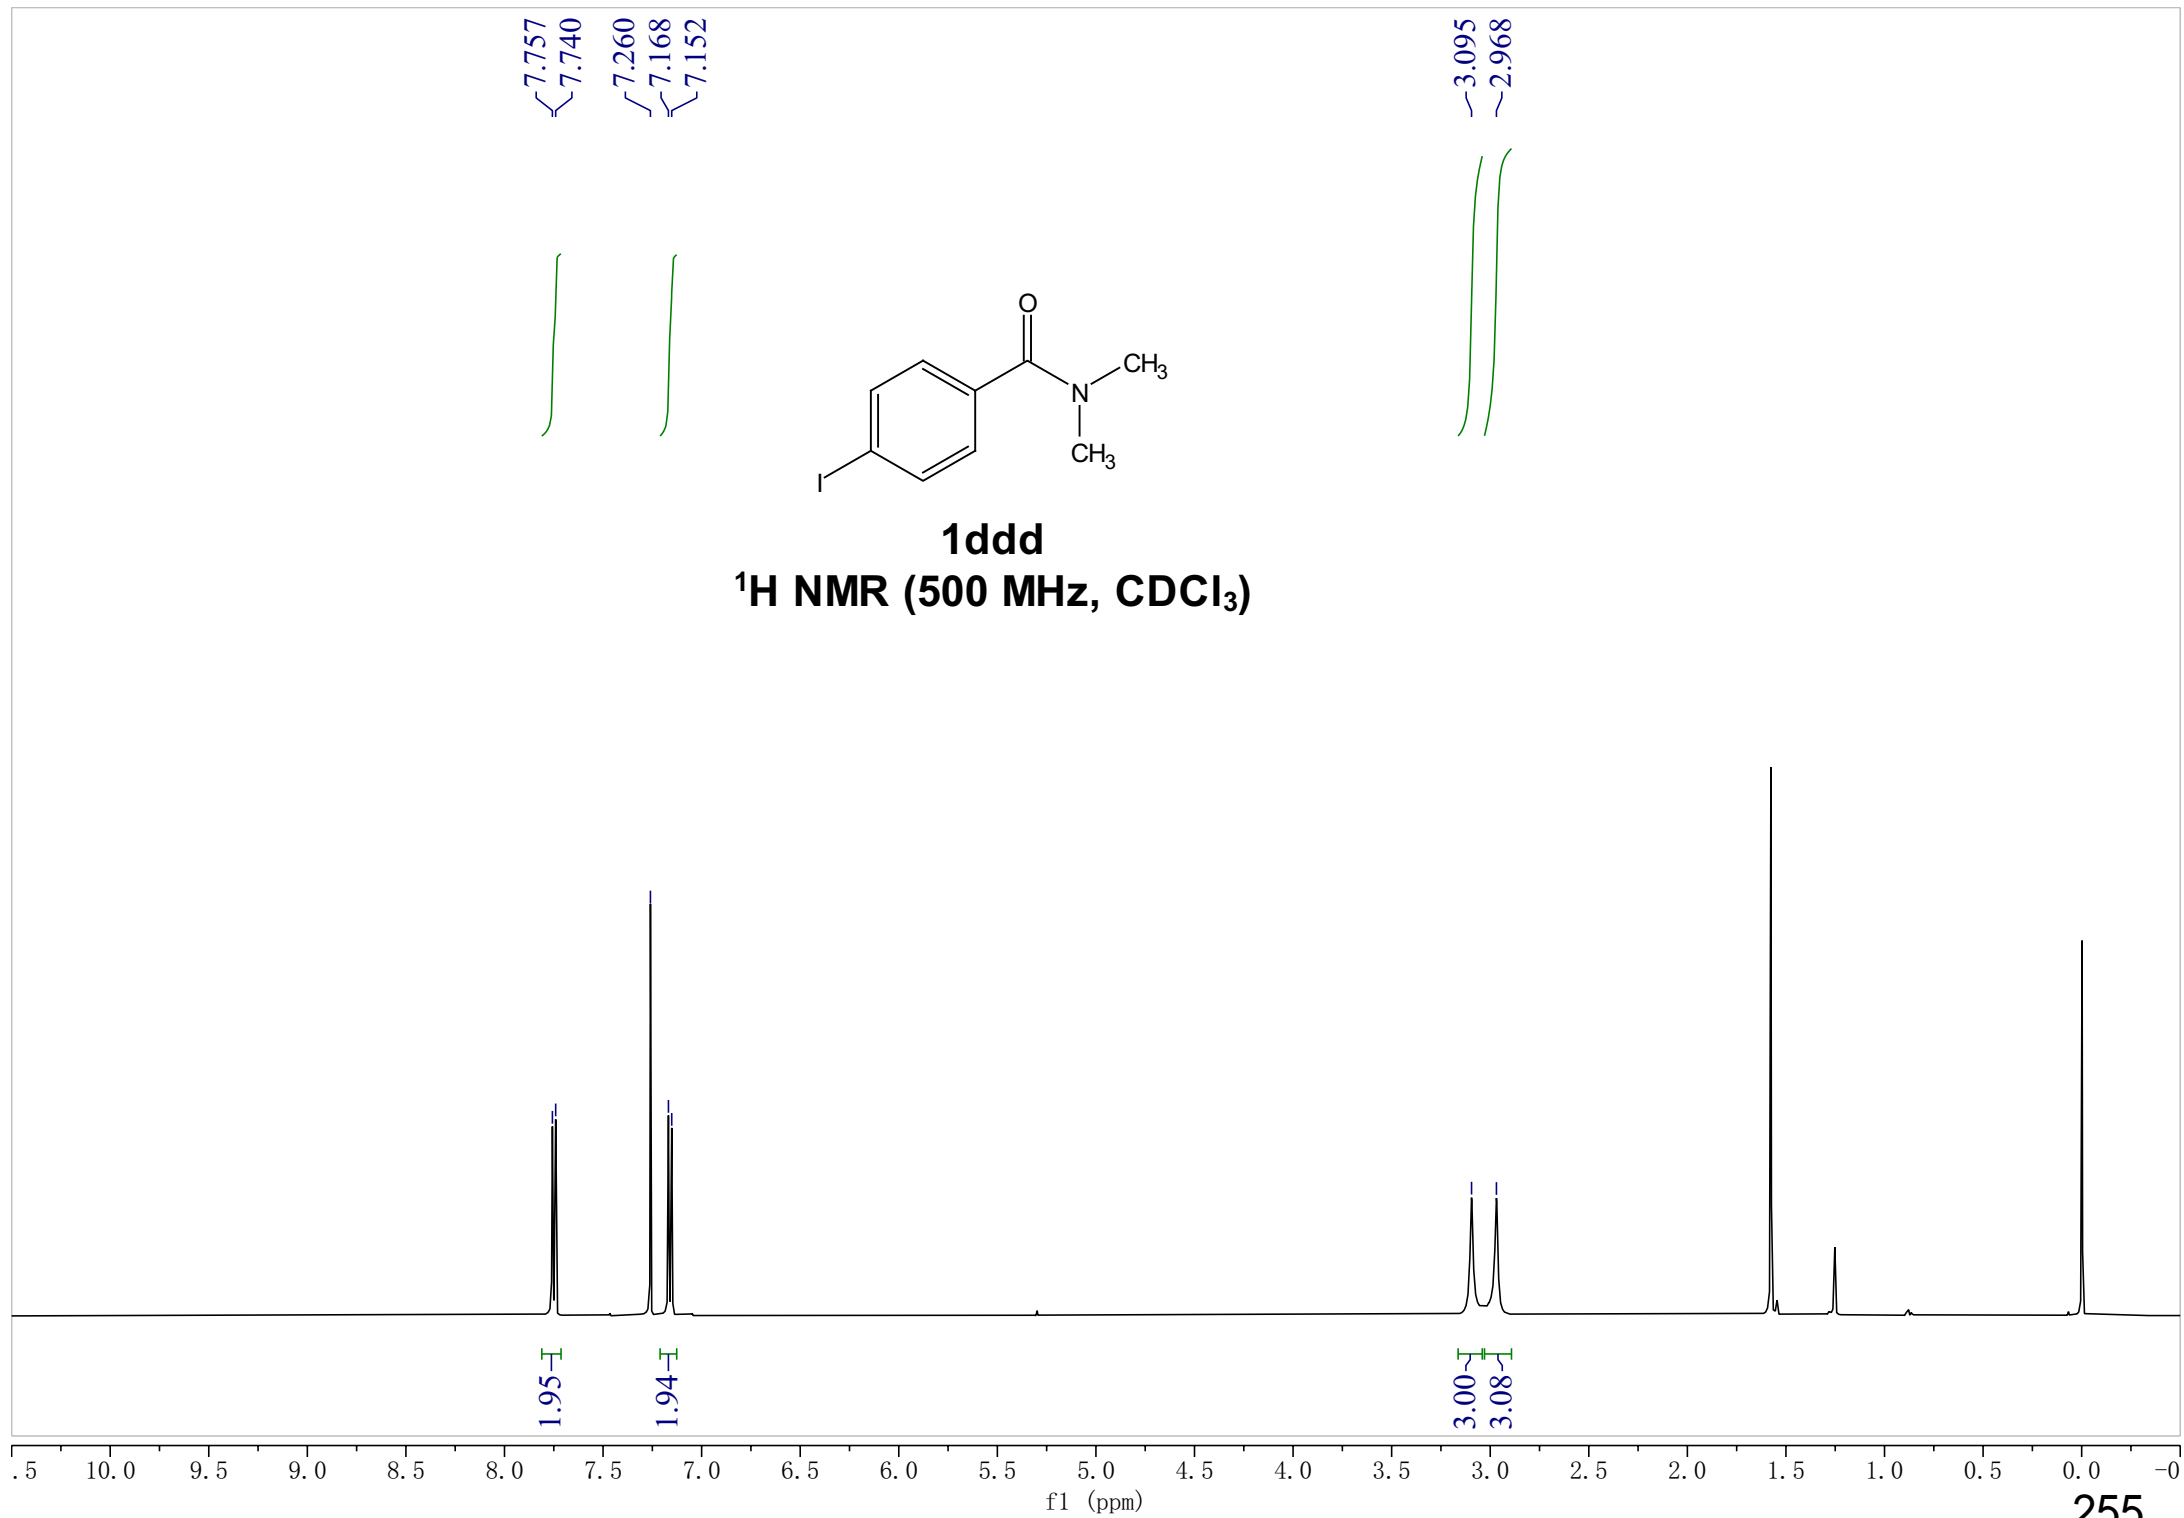



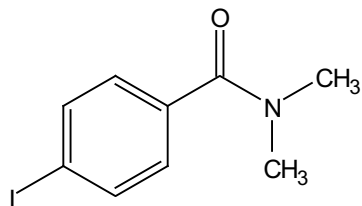

**1ddd**

**$^{13}\text{C}$  NMR (125 MHz,  $\text{CDCl}_3$ )**

—170.785

~137.657

~135.842

~128.981

—95.816

77.414

77.363

77.160

76.906

—39.651

—35.517

10 200 190 180 170 160 150 140 130 120 110 100 90 80 70 60 50 40 30 20 10 0 -10

f1 (ppm)

256

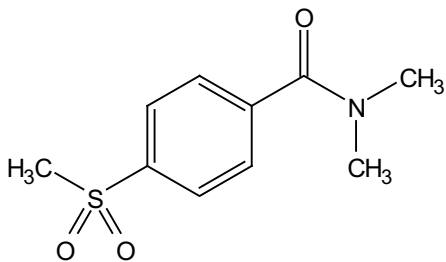

1eee

<sup>1</sup>H NMR (500 MHz, CDCl<sub>3</sub>)

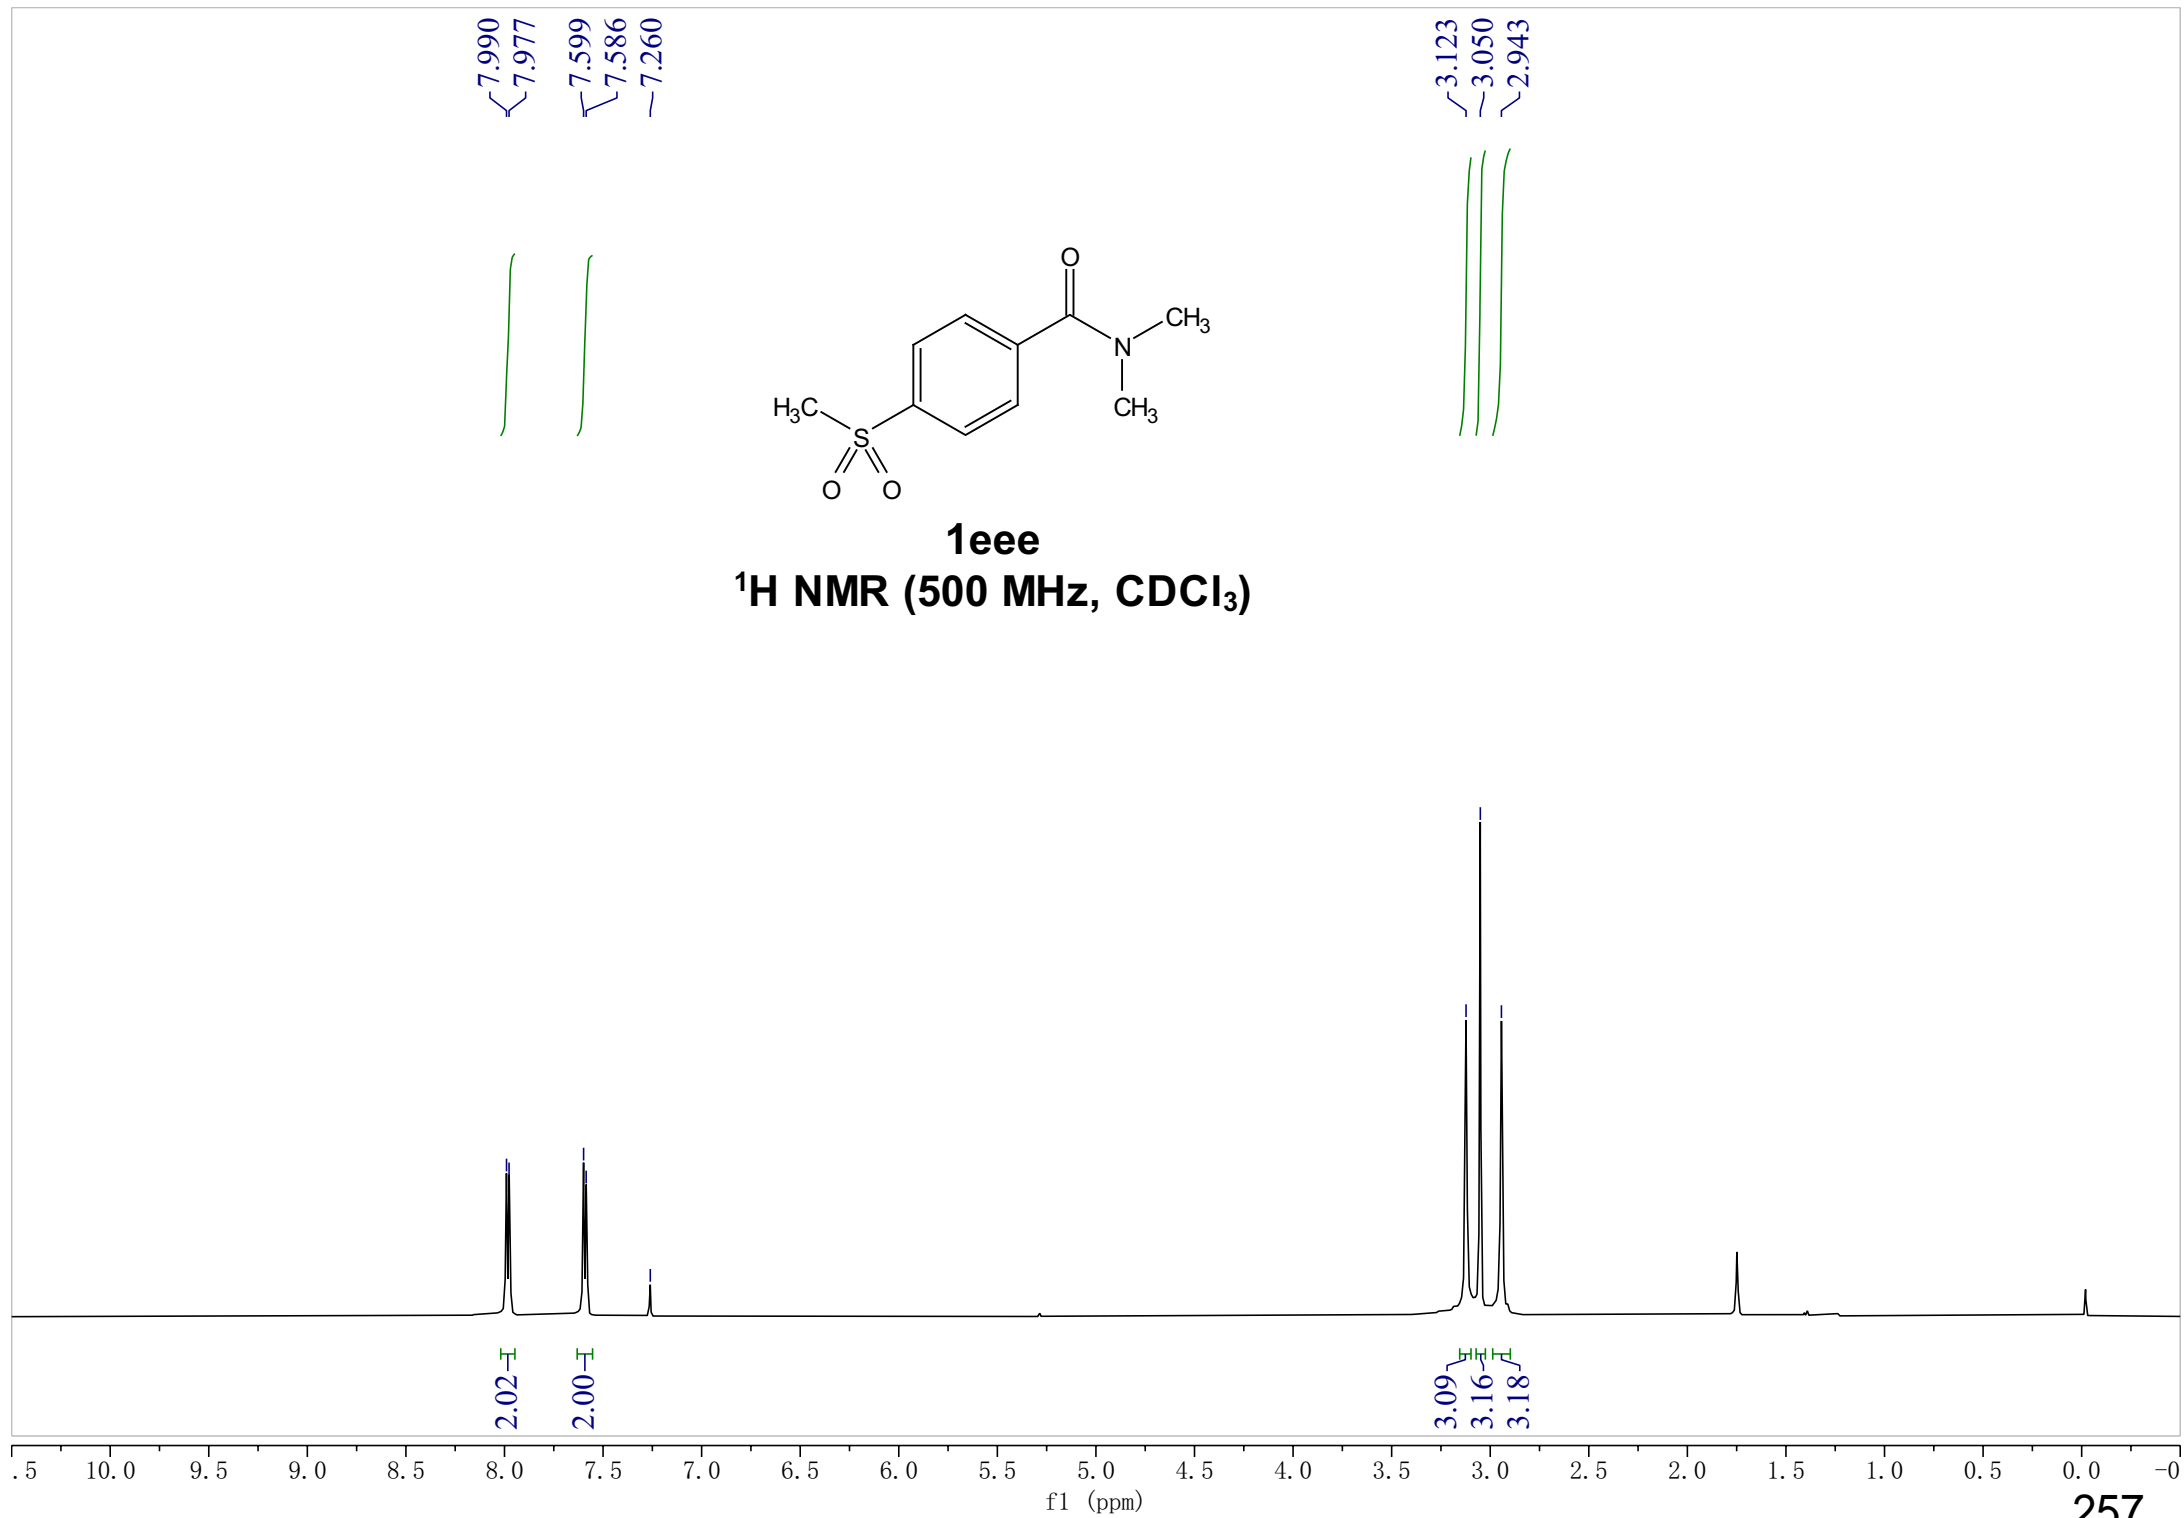

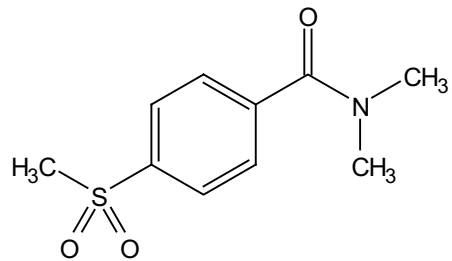

**1eee**

**$^{13}\text{C}$  NMR (125 MHz,  $\text{CDCl}_3$ )**

— 169.676

~ 141.895  
~ 141.463

~ 128.027  
~ 127.824

~ 77.416  
~ 77.161  
~ 76.907

~ 44.538  
~ 39.444  
~ 35.418

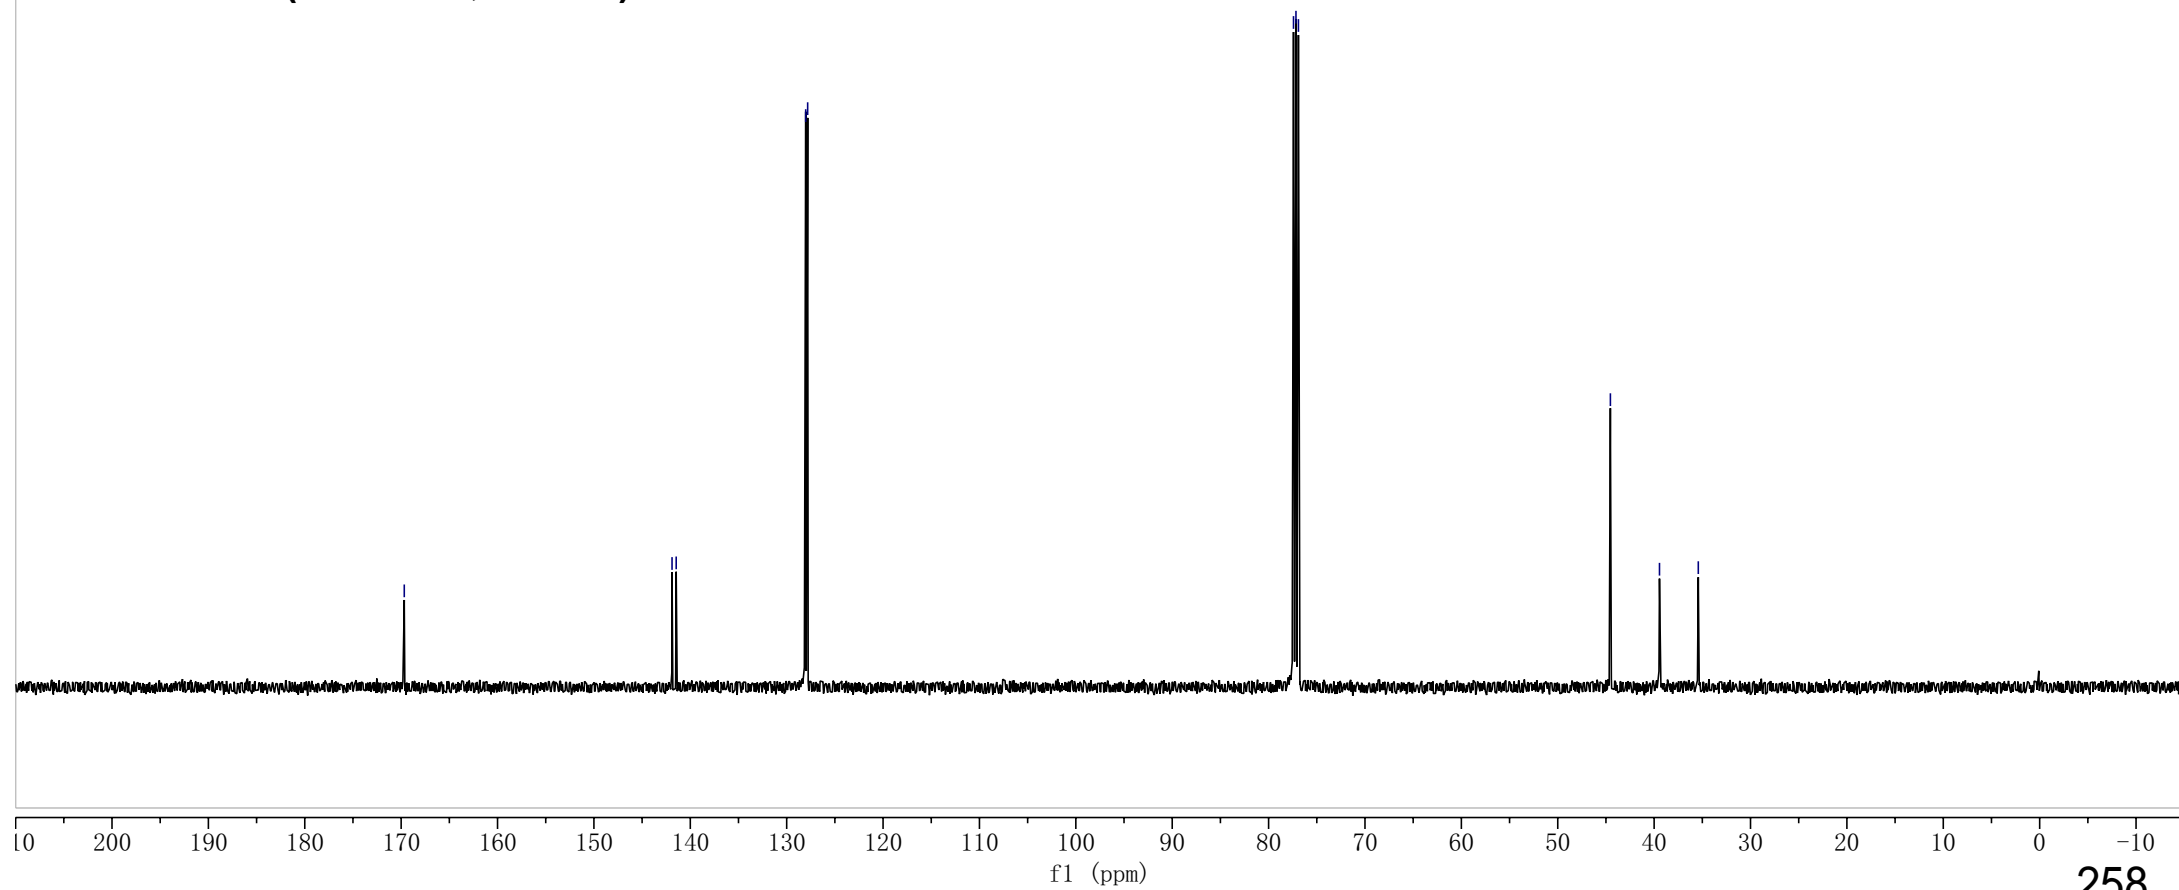

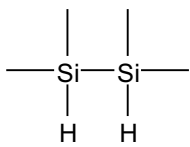

**6a**

**<sup>1</sup>H NMR (500 MHz, CDCl<sub>3</sub>)**

—7.260 CDCl<sub>3</sub>

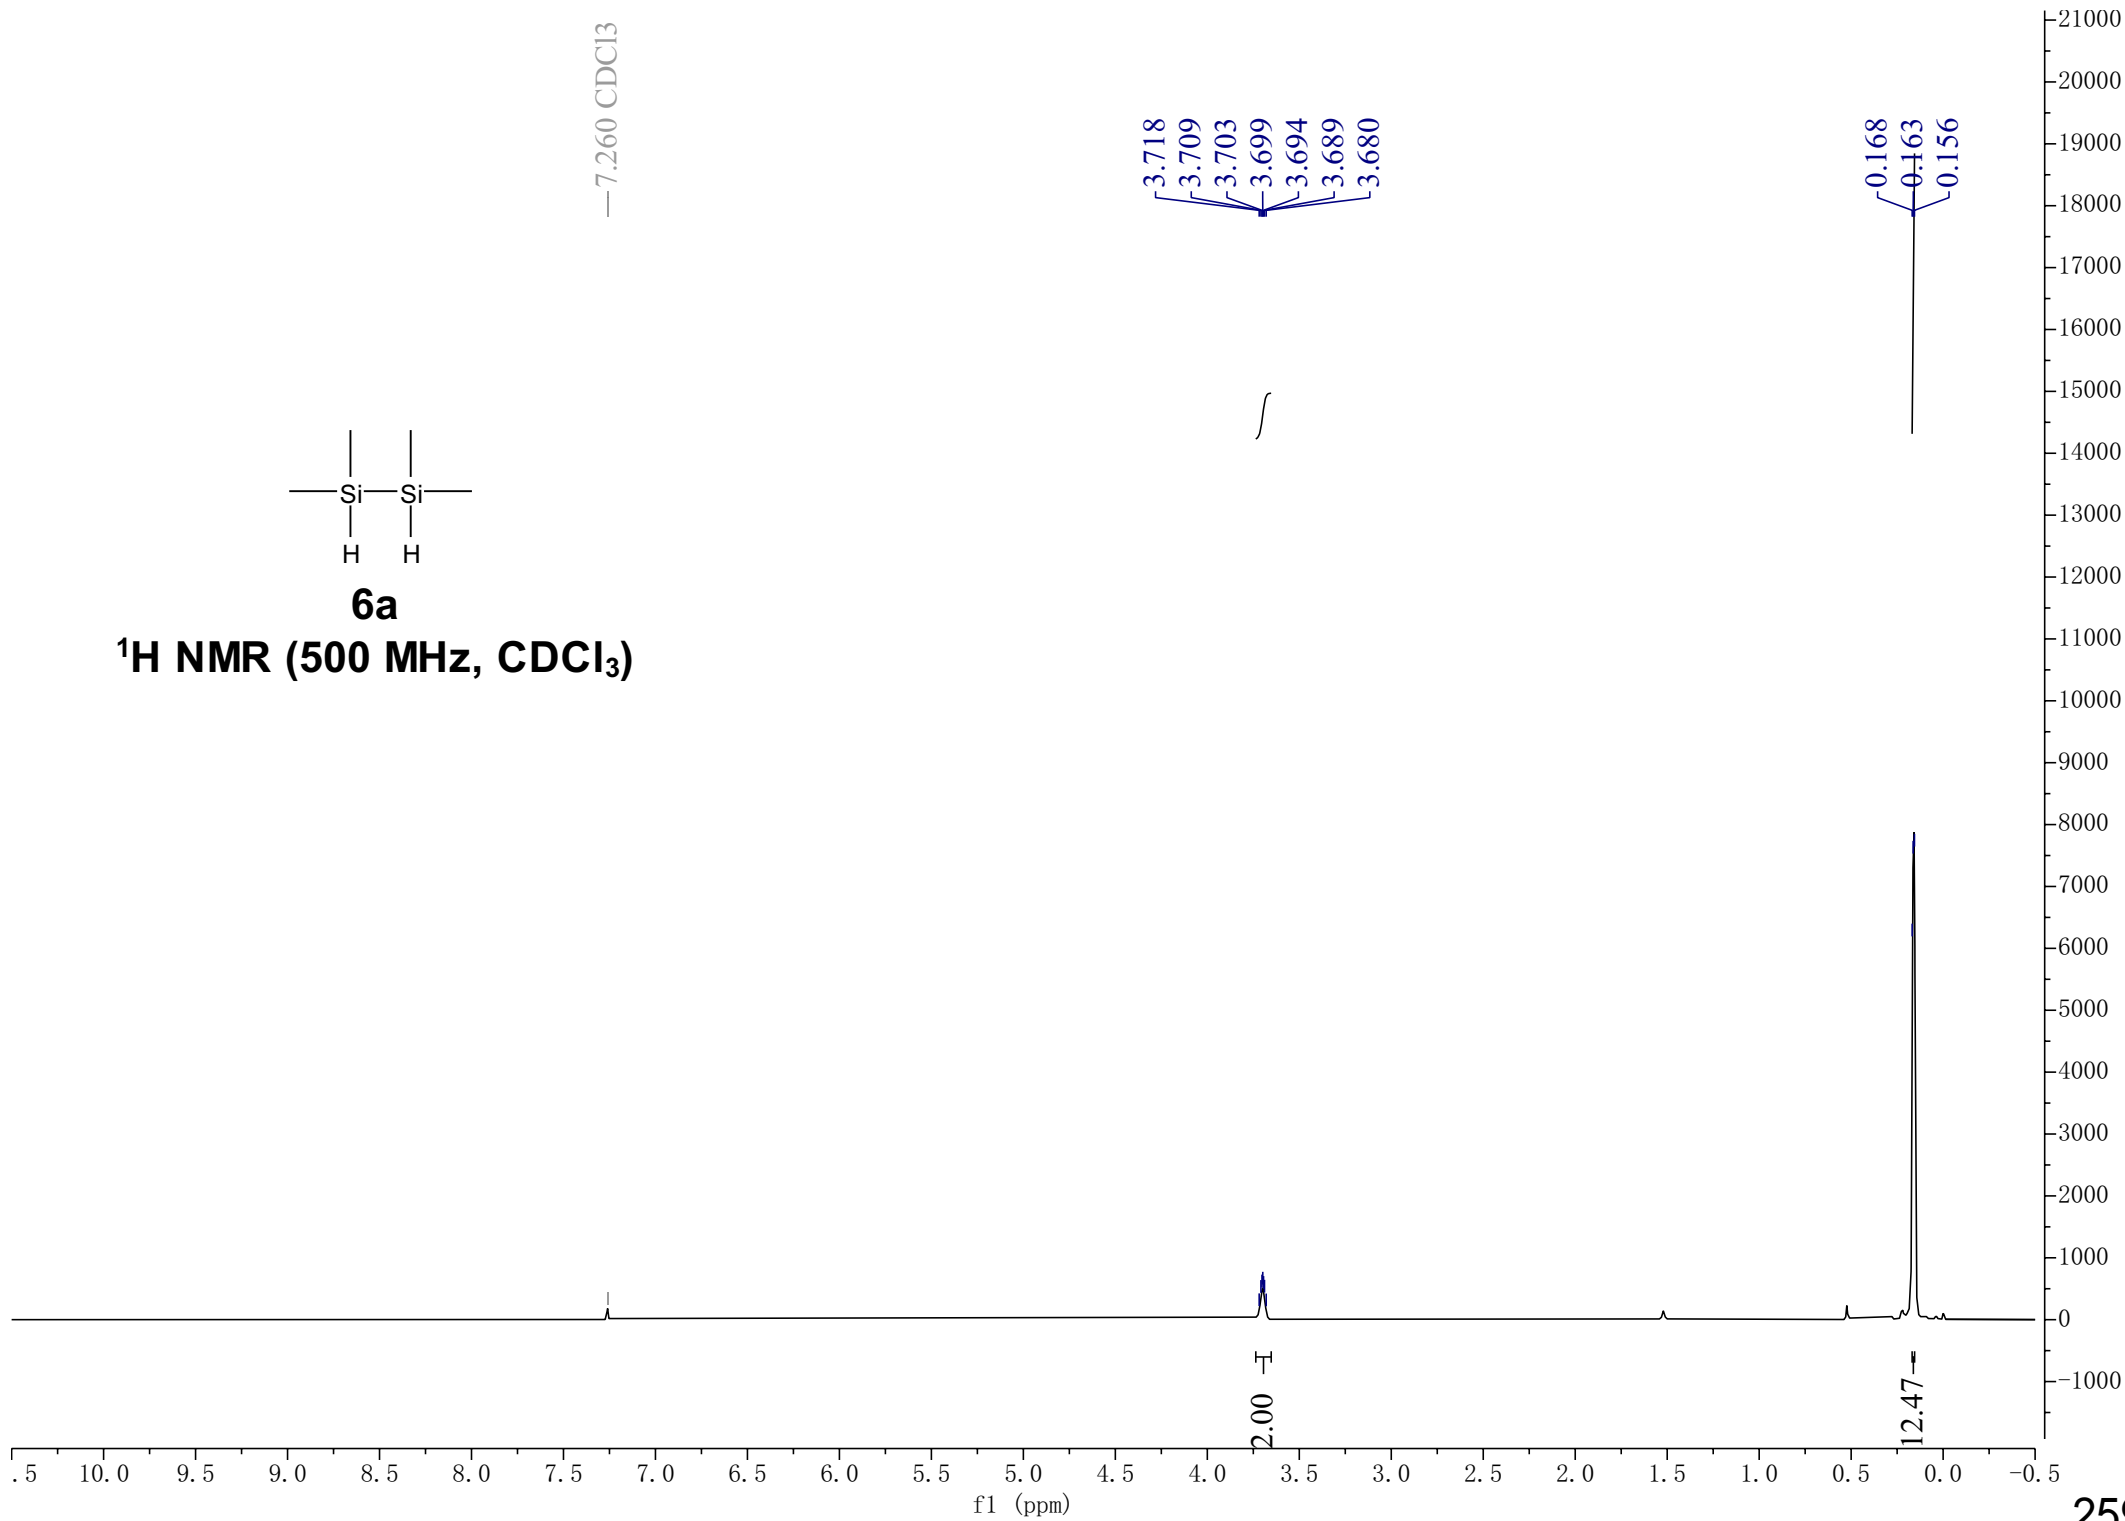

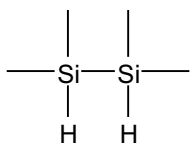

**6a**

**$^{13}\text{C}$  NMR (125 MHz,  $\text{CDCl}_3$ )**

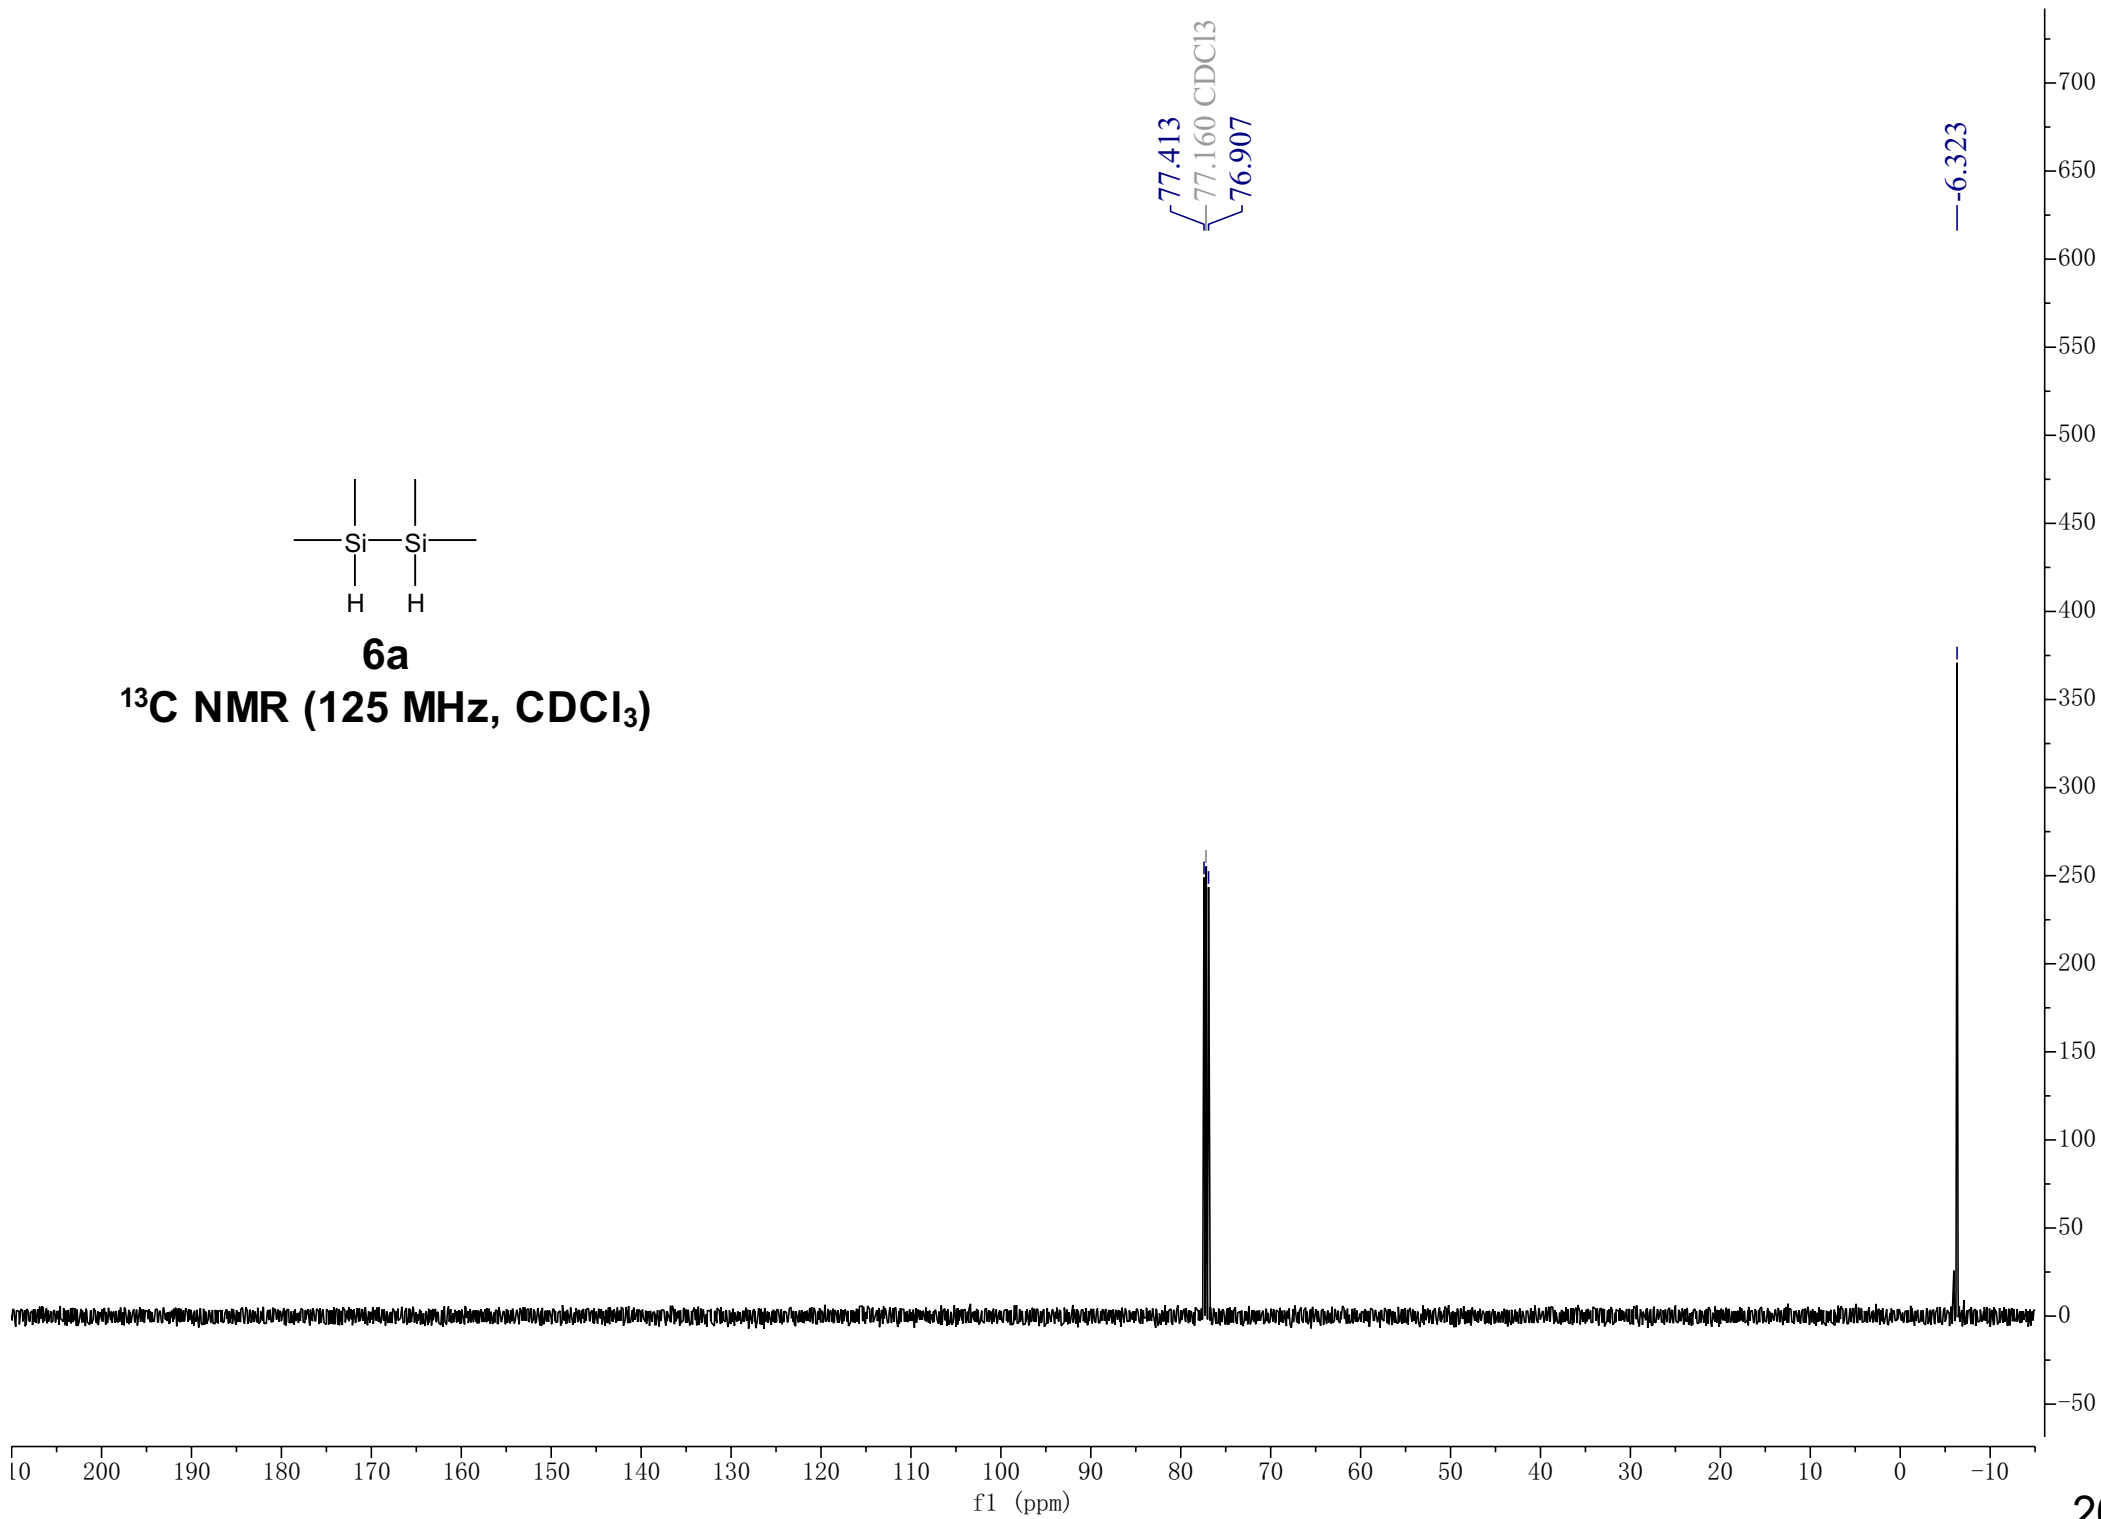

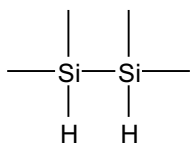

**6a**

**$^{29}\text{Si}$  NMR (99 MHz,  $\text{CDCl}_3$ )**

---39.026

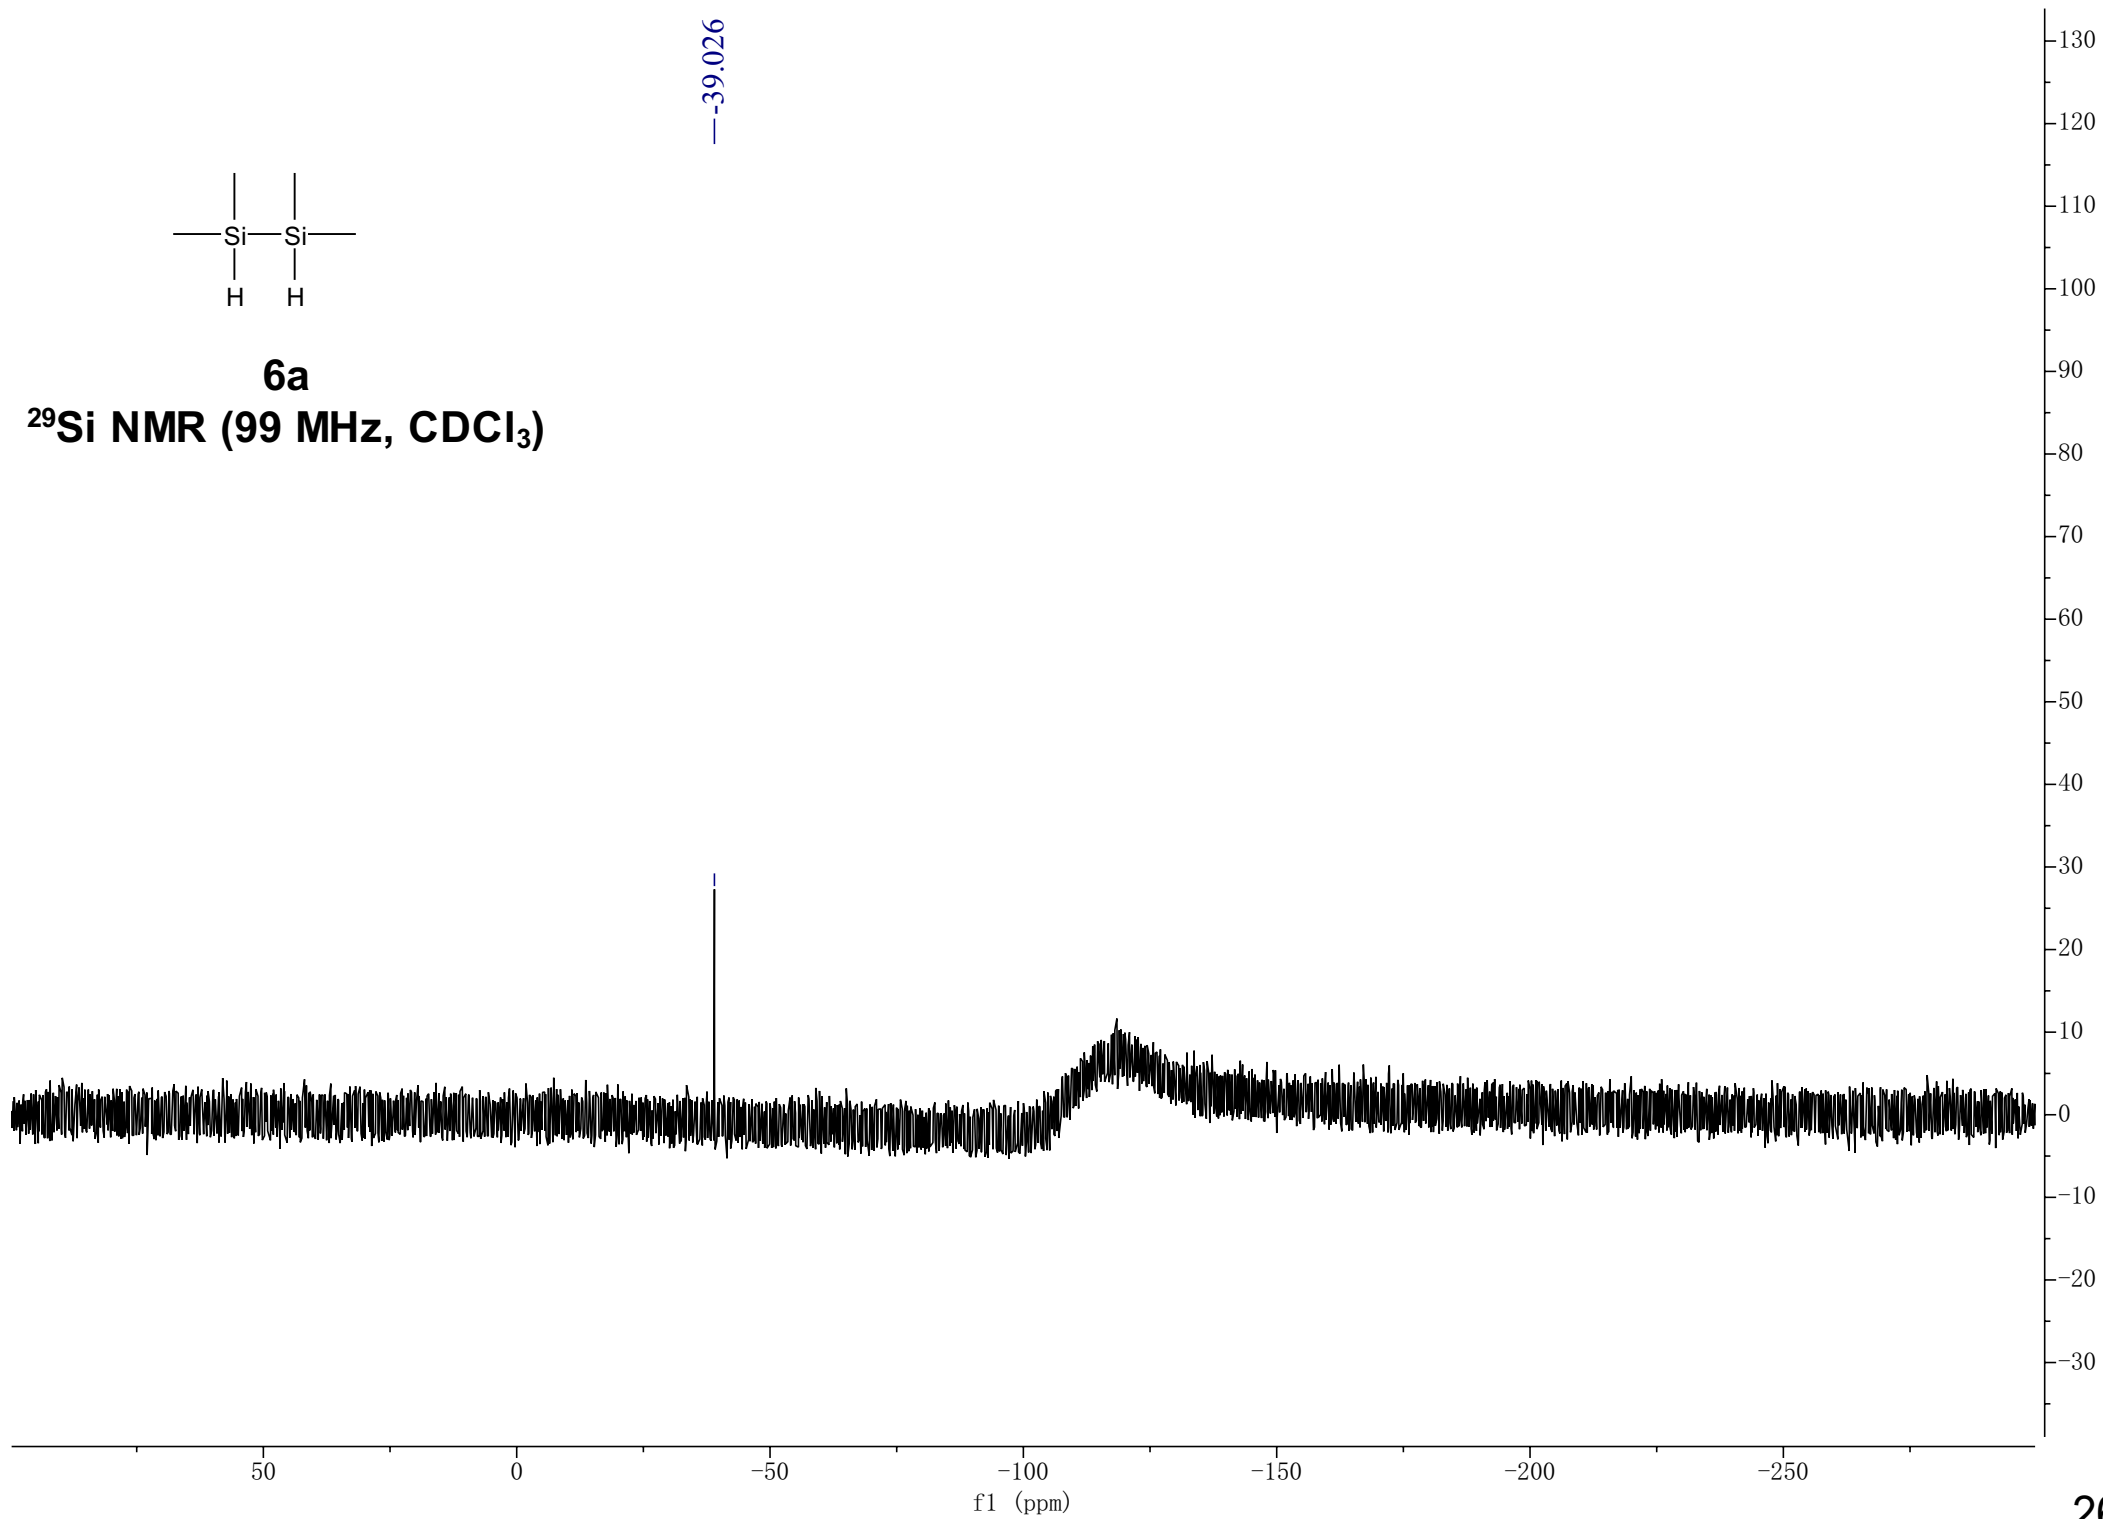

Supplement: d2qo01766k1.pdf [file d2qo01766k1.pdf]
